# Supplementary material for: Insights into pharmacokinetic properties for exposure chemicals: predictive modelling of human plasma fraction unbound (fu) and hepatocyte intrinsic clearance (Clint) data using machine learning
Source: Royal Society of Chemistry journal article supplement (doi:10.1039/d4dd00082j), 2024-01-01
Supplement: d4dd00082j1.sdf [file d4dd00082j1.sdf]

1
  Mrv2314 01052423262D          

 45 47  0  0  1  0            999 V2000
    3.1312    1.1653    0.0000 C   0  0  0  0  0  0  0  0  0  0  0  0
    3.5212    0.4383    0.0000 C   0  0  2  0  0  0  0  0  0  0  0  0
    3.9558    1.1395    0.0000 C   0  0  0  0  0  0  0  0  0  0  0  0
    4.7804    1.1137    0.0000 C   0  0  0  0  0  0  0  0  0  0  0  0
    5.1704    0.3867    0.0000 C   0  0  0  0  0  0  0  0  0  0  0  0
    4.7358   -0.3145    0.0000 C   0  0  0  0  0  0  0  0  0  0  0  0
    3.9112   -0.2887    0.0000 C   0  0  2  0  0  0  0  0  0  0  0  0
    3.4766   -0.9900    0.0000 C   0  0  0  0  0  0  0  0  0  0  0  0
    2.6520   -0.9642    0.0000 C   0  0  0  0  0  0  0  0  0  0  0  0
    2.2620   -0.2372    0.0000 C   0  0  2  0  0  0  0  0  0  0  0  0
    2.6966    0.4640    0.0000 C   0  0  2  0  0  0  0  0  0  0  0  0
    2.1640    1.0941    0.0000 C   0  0  0  0  0  0  0  0  0  0  0  0
    1.4002    0.7822    0.0000 C   0  0  0  0  0  0  0  0  0  0  0  0
    1.4608   -0.0406    0.0000 O   0  0  0  0  0  0  0  0  0  0  0  0
    1.7565   -0.8892    0.0000 C   0  0  0  0  0  0  0  0  0  0  0  0
    5.4214   -0.7733    0.0000 C   0  0  0  0  0  0  0  0  0  0  0  0
    4.7388   -1.1395    0.0000 C   0  0  0  0  0  0  0  0  0  0  0  0
    3.7175    1.7457    0.0000 H   0  0  0  0  0  0  0  0  0  0  0  0
    3.1138    1.9901    0.0000 H   0  0  0  0  0  0  0  0  0  0  0  0
    2.5209    1.7204    0.0000 H   0  0  0  0  0  0  0  0  0  0  0  0
    4.3458    0.4125    0.0000 H   0  0  0  0  0  0  0  0  0  0  0  0
    4.4309    1.8139    0.0000 H   0  0  0  0  0  0  0  0  0  0  0  0
    5.6047    1.0799    0.0000 H   0  0  0  0  0  0  0  0  0  0  0  0
    5.2287    1.8063    0.0000 H   0  0  0  0  0  0  0  0  0  0  0  0
    5.5592   -0.3409    0.0000 H   0  0  0  0  0  0  0  0  0  0  0  0
    5.9949    0.3583    0.0000 H   0  0  0  0  0  0  0  0  0  0  0  0
    3.0866   -0.2630    0.0000 H   0  0  0  0  0  0  0  0  0  0  0  0
    3.4988   -1.8147    0.0000 H   0  0  0  0  0  0  0  0  0  0  0  0
    4.1514   -1.4646    0.0000 H   0  0  0  0  0  0  0  0  0  0  0  0
    2.3214   -1.7201    0.0000 H   0  0  0  0  0  0  0  0  0  0  0  0
    2.8938   -1.7530    0.0000 H   0  0  0  0  0  0  0  0  0  0  0  0
    1.8738    0.4035    0.0000 H   0  0  0  0  0  0  0  0  0  0  0  0
    1.9143    1.8804    0.0000 H   0  0  0  0  0  0  0  0  0  0  0  0
    1.4168    1.4438    0.0000 H   0  0  0  0  0  0  0  0  0  0  0  0
    0.6213    1.0541    0.0000 H   0  0  0  0  0  0  0  0  0  0  0  0
    0.6353    0.4730    0.0000 H   0  0  0  0  0  0  0  0  0  0  0  0
    0.9423   -0.7560    0.0000 H   0  0  0  0  0  0  0  0  0  0  0  0
    1.2509   -1.5412    0.0000 H   0  0  0  0  0  0  0  0  0  0  0  0
    2.0882   -1.6445    0.0000 H   0  0  0  0  0  0  0  0  0  0  0  0
    5.3386   -1.5942    0.0000 H   0  0  0  0  0  0  0  0  0  0  0  0
    6.0559   -1.3006    0.0000 H   0  0  0  0  0  0  0  0  0  0  0  0
    6.2133   -0.5418    0.0000 H   0  0  0  0  0  0  0  0  0  0  0  0
    4.4154   -1.8985    0.0000 H   0  0  0  0  0  0  0  0  0  0  0  0
    4.9507   -1.9368    0.0000 H   0  0  0  0  0  0  0  0  0  0  0  0
    4.0273   -0.7219    0.0000 H   0  0  0  0  0  0  0  0  0  0  0  0
  2  1  1  6  0  0  0
  2  3  1  0  0  0  0
  3  4  1  0  0  0  0
  4  5  1  0  0  0  0
  5  6  1  0  0  0  0
  7  6  1  0  0  0  0
  2  7  1  0  0  0  0
  7  8  1  0  0  0  0
  8  9  1  0  0  0  0
 10  9  1  0  0  0  0
 11 10  1  0  0  0  0
  2 11  1  0  0  0  0
 11 12  1  0  0  0  0
 12 13  1  0  0  0  0
 13 14  1  0  0  0  0
 10 14  1  0  0  0  0
 10 15  1  6  0  0  0
  6 16  1  0  0  0  0
  6 17  1  0  0  0  0
  1 18  1  0  0  0  0
  1 19  1  0  0  0  0
  1 20  1  0  0  0  0
  3 21  1  0  0  0  0
  3 22  1  0  0  0  0
  4 23  1  0  0  0  0
  4 24  1  0  0  0  0
  5 25  1  0  0  0  0
  5 26  1  0  0  0  0
  7 27  1  1  0  0  0
  8 28  1  0  0  0  0
  8 29  1  0  0  0  0
  9 30  1  0  0  0  0
  9 31  1  0  0  0  0
 11 32  1  1  0  0  0
 12 33  1  0  0  0  0
 12 34  1  0  0  0  0
 13 35  1  0  0  0  0
 13 36  1  0  0  0  0
 15 37  1  0  0  0  0
 15 38  1  0  0  0  0
 15 39  1  0  0  0  0
 16 40  1  0  0  0  0
 16 41  1  0  0  0  0
 16 42  1  0  0  0  0
 17 43  1  0  0  0  0
 17 44  1  0  0  0  0
 17 45  1  0  0  0  0
M  END
$$$$
2
  Mrv2314 01052423262D          

 26 27  0  0  1  0            999 V2000
    2.1665   -1.4675    0.0000 C   0  0  0  0  0  0  0  0  0  0  0  0
    1.3819   -1.7224    0.0000 N   0  0  0  0  0  0  0  0  0  0  0  0
    1.1270   -2.5070    0.0000 C   0  0  0  0  0  0  0  0  0  0  0  0
    0.3020   -2.5070    0.0000 C   0  0  0  0  0  0  0  0  0  0  0  0
    0.0470   -1.7224    0.0000 C   0  0  0  0  0  0  0  0  0  0  0  0
    0.7145   -1.2375    0.0000 C   0  0  1  0  0  0  0  0  0  0  0  0
    0.7145   -0.4125    0.0000 C   0  0  0  0  0  0  0  0  0  0  0  0
    0.0000    0.0000    0.0000 C   0  0  0  0  0  0  0  0  0  0  0  0
    0.0000    0.8250    0.0000 N   0  0  0  0  0  0  0  0  0  0  0  0
    0.7145    1.2375    0.0000 C   0  0  0  0  0  0  0  0  0  0  0  0
    1.4289    0.8250    0.0000 C   0  0  0  0  0  0  0  0  0  0  0  0
    1.4289   -0.0000    0.0000 C   0  0  0  0  0  0  0  0  0  0  0  0
    2.4215   -2.2521    0.0000 H   0  0  0  0  0  0  0  0  0  0  0  0
    2.9512   -1.2125    0.0000 H   0  0  0  0  0  0  0  0  0  0  0  0
    1.9116   -0.6829    0.0000 H   0  0  0  0  0  0  0  0  0  0  0  0
    1.2418   -3.3240    0.0000 H   0  0  0  0  0  0  0  0  0  0  0  0
    1.8685   -2.8687    0.0000 H   0  0  0  0  0  0  0  0  0  0  0  0
   -0.4395   -2.8687    0.0000 H   0  0  0  0  0  0  0  0  0  0  0  0
    0.1872   -3.3240    0.0000 H   0  0  0  0  0  0  0  0  0  0  0  0
   -0.5261   -1.1290    0.0000 H   0  0  0  0  0  0  0  0  0  0  0  0
   -0.7654   -1.8657    0.0000 H   0  0  0  0  0  0  0  0  0  0  0  0
    1.4496   -0.8630    0.0000 H   0  0  0  0  0  0  0  0  0  0  0  0
   -0.7145   -0.4125    0.0000 H   0  0  0  0  0  0  0  0  0  0  0  0
    0.7145    2.0625    0.0000 H   0  0  0  0  0  0  0  0  0  0  0  0
    2.1434    1.2375    0.0000 H   0  0  0  0  0  0  0  0  0  0  0  0
    2.2152    0.2498    0.0000 H   0  0  0  0  0  0  0  0  0  0  0  0
  1  2  1  0  0  0  0
  2  3  1  0  0  0  0
  3  4  1  0  0  0  0
  4  5  1  0  0  0  0
  6  5  1  0  0  0  0
  6  2  1  0  0  0  0
  6  7  1  1  0  0  0
  7  8  4  0  0  0  0
  8  9  4  0  0  0  0
  9 10  4  0  0  0  0
 10 11  4  0  0  0  0
 11 12  4  0  0  0  0
  7 12  4  0  0  0  0
  1 13  1  0  0  0  0
  1 14  1  0  0  0  0
  1 15  1  0  0  0  0
  3 16  1  0  0  0  0
  3 17  1  0  0  0  0
  4 18  1  0  0  0  0
  4 19  1  0  0  0  0
  5 20  1  0  0  0  0
  5 21  1  0  0  0  0
  6 22  1  6  0  0  0
  8 23  1  0  0  0  0
 10 24  1  0  0  0  0
 11 25  1  0  0  0  0
 12 26  1  0  0  0  0
M  END
$$$$
3
  Mrv2314 01052423262D          

 36 37  0  0  0  0            999 V2000
   -2.1434   -5.3625    0.0000 C   0  0  0  0  0  0  0  0  0  0  0  0
   -2.1434   -4.5375    0.0000 C   0  0  0  0  0  0  0  0  0  0  0  0
   -2.8579   -4.1250    0.0000 C   0  0  0  0  0  0  0  0  0  0  0  0
   -2.8579   -3.3000    0.0000 O   0  0  0  0  0  0  0  0  0  0  0  0
   -3.5724   -4.5375    0.0000 O   0  0  0  0  0  0  0  0  0  0  0  0
   -4.2868   -4.1250    0.0000 C   0  0  0  0  0  0  0  0  0  0  0  0
   -1.4289   -4.1250    0.0000 O   0  0  0  0  0  0  0  0  0  0  0  0
   -0.7145   -4.5375    0.0000 C   0  0  0  0  0  0  0  0  0  0  0  0
    0.0000   -4.1250    0.0000 C   0  0  0  0  0  0  0  0  0  0  0  0
    0.7145   -4.5375    0.0000 C   0  0  0  0  0  0  0  0  0  0  0  0
    0.7145   -5.3625    0.0000 C   0  0  0  0  0  0  0  0  0  0  0  0
    0.0000   -5.7750    0.0000 C   0  0  0  0  0  0  0  0  0  0  0  0
   -0.7145   -5.3625    0.0000 C   0  0  0  0  0  0  0  0  0  0  0  0
    1.4289   -5.7750    0.0000 O   0  0  0  0  0  0  0  0  0  0  0  0
    2.1434   -5.3625    0.0000 C   0  0  0  0  0  0  0  0  0  0  0  0
    2.1434   -4.5375    0.0000 C   0  0  0  0  0  0  0  0  0  0  0  0
    2.8579   -4.1250    0.0000 C   0  0  0  0  0  0  0  0  0  0  0  0
    3.5724   -4.5375    0.0000 C   0  0  0  0  0  0  0  0  0  0  0  0
    3.5724   -5.3625    0.0000 C   0  0  0  0  0  0  0  0  0  0  0  0
    2.8579   -5.7750    0.0000 C   0  0  0  0  0  0  0  0  0  0  0  0
    4.2868   -4.1250    0.0000 Cl  0  0  0  0  0  0  0  0  0  0  0  0
    1.4289   -4.1250    0.0000 Cl  0  0  0  0  0  0  0  0  0  0  0  0
   -2.9684   -5.3625    0.0000 H   0  0  0  0  0  0  0  0  0  0  0  0
   -2.1434   -6.1875    0.0000 H   0  0  0  0  0  0  0  0  0  0  0  0
   -1.3184   -5.3625    0.0000 H   0  0  0  0  0  0  0  0  0  0  0  0
   -2.8579   -4.9500    0.0000 H   0  0  0  0  0  0  0  0  0  0  0  0
   -3.8743   -3.4105    0.0000 H   0  0  0  0  0  0  0  0  0  0  0  0
   -5.0013   -3.7125    0.0000 H   0  0  0  0  0  0  0  0  0  0  0  0
   -4.6993   -4.8395    0.0000 H   0  0  0  0  0  0  0  0  0  0  0  0
    0.0000   -3.3000    0.0000 H   0  0  0  0  0  0  0  0  0  0  0  0
    1.4289   -4.9500    0.0000 H   0  0  0  0  0  0  0  0  0  0  0  0
    0.0000   -6.6000    0.0000 H   0  0  0  0  0  0  0  0  0  0  0  0
   -0.9280   -6.1594    0.0000 H   0  0  0  0  0  0  0  0  0  0  0  0
    2.8579   -3.3000    0.0000 H   0  0  0  0  0  0  0  0  0  0  0  0
    4.2868   -5.7750    0.0000 H   0  0  0  0  0  0  0  0  0  0  0  0
    2.8579   -6.6000    0.0000 H   0  0  0  0  0  0  0  0  0  0  0  0
  1  2  1  0  0  0  0
  2  3  1  0  0  0  0
  3  4  2  0  0  0  0
  3  5  1  0  0  0  0
  5  6  1  0  0  0  0
  2  7  1  0  0  0  0
  7  8  1  0  0  0  0
  8  9  4  0  0  0  0
  9 10  4  0  0  0  0
 10 11  4  0  0  0  0
 11 12  4  0  0  0  0
 12 13  4  0  0  0  0
  8 13  4  0  0  0  0
 11 14  1  0  0  0  0
 14 15  1  0  0  0  0
 15 16  4  0  0  0  0
 16 17  4  0  0  0  0
 17 18  4  0  0  0  0
 18 19  4  0  0  0  0
 19 20  4  0  0  0  0
 15 20  4  0  0  0  0
 18 21  1  0  0  0  0
 16 22  1  0  0  0  0
  1 23  1  0  0  0  0
  1 24  1  0  0  0  0
  1 25  1  0  0  0  0
  2 26  1  0  0  0  0
  6 27  1  0  0  0  0
  6 28  1  0  0  0  0
  6 29  1  0  0  0  0
  9 30  1  0  0  0  0
 10 31  1  0  0  0  0
 12 32  1  0  0  0  0
 13 33  1  0  0  0  0
 17 34  1  0  0  0  0
 19 35  1  0  0  0  0
 20 36  1  0  0  0  0
M  END
$$$$
4
  Mrv2314 01052423262D          

 55 57  0  0  1  0            999 V2000
    5.7904    2.6586    0.0000 C   0  0  0  0  0  0  0  0  0  0  0  0
    4.9654    2.6586    0.0000 C   0  0  0  0  0  0  0  0  0  0  0  0
    4.5529    3.3731    0.0000 O   0  0  0  0  0  0  0  0  0  0  0  0
    4.5529    1.9441    0.0000 O   0  0  0  0  0  0  0  0  0  0  0  0
    3.7279    1.9441    0.0000 C   0  0  2  0  0  0  0  0  0  0  0  0
    3.3700    1.2008    0.0000 C   0  0  1  0  0  0  0  0  0  0  0  0
    2.5656    1.0173    0.0000 S   0  0  0  0  0  0  0  0  0  0  0  0
    1.9206    1.5316    0.0000 C   0  0  0  0  0  0  0  0  0  0  0  0
    1.2062    1.1191    0.0000 C   0  0  0  0  0  0  0  0  0  0  0  0
    0.4917    1.5316    0.0000 C   0  0  0  0  0  0  0  0  0  0  0  0
    0.4917    2.3566    0.0000 C   0  0  0  0  0  0  0  0  0  0  0  0
    1.2062    2.7691    0.0000 C   0  0  0  0  0  0  0  0  0  0  0  0
    1.9206    2.3566    0.0000 C   0  0  0  0  0  0  0  0  0  0  0  0
    2.5656    2.8710    0.0000 N   0  0  0  0  0  0  0  0  0  0  0  0
    3.3700    2.6874    0.0000 C   0  0  0  0  0  0  0  0  0  0  0  0
    3.8843    3.3325    0.0000 O   0  0  0  0  0  0  0  0  0  0  0  0
    2.3821    3.6753    0.0000 C   0  0  0  0  0  0  0  0  0  0  0  0
    1.5937    3.9185    0.0000 C   0  0  0  0  0  0  0  0  0  0  0  0
    1.4101    4.7228    0.0000 N   0  0  0  0  0  0  0  0  0  0  0  0
    0.6218    4.9660    0.0000 C   0  0  0  0  0  0  0  0  0  0  0  0
    2.0149    5.2840    0.0000 C   0  0  0  0  0  0  0  0  0  0  0  0
    3.8843    0.5558    0.0000 C   0  0  0  0  0  0  0  0  0  0  0  0
    4.7001    0.6788    0.0000 C   0  0  0  0  0  0  0  0  0  0  0  0
    5.2145    0.0338    0.0000 C   0  0  0  0  0  0  0  0  0  0  0  0
    4.9131   -0.7342    0.0000 C   0  0  0  0  0  0  0  0  0  0  0  0
    4.0973   -0.8571    0.0000 C   0  0  0  0  0  0  0  0  0  0  0  0
    3.5829   -0.2121    0.0000 C   0  0  0  0  0  0  0  0  0  0  0  0
    5.4275   -1.3792    0.0000 O   0  0  0  0  0  0  0  0  0  0  0  0
    6.2433   -1.2562    0.0000 C   0  0  0  0  0  0  0  0  0  0  0  0
    5.7904    1.8336    0.0000 H   0  0  0  0  0  0  0  0  0  0  0  0
    6.6154    2.6586    0.0000 H   0  0  0  0  0  0  0  0  0  0  0  0
    5.7904    3.4836    0.0000 H   0  0  0  0  0  0  0  0  0  0  0  0
    4.1668    2.6427    0.0000 H   0  0  0  0  0  0  0  0  0  0  0  0
    4.1898    1.2932    0.0000 H   0  0  0  0  0  0  0  0  0  0  0  0
    1.2062    0.2941    0.0000 H   0  0  0  0  0  0  0  0  0  0  0  0
   -0.2228    1.1191    0.0000 H   0  0  0  0  0  0  0  0  0  0  0  0
   -0.2228    2.7691    0.0000 H   0  0  0  0  0  0  0  0  0  0  0  0
    1.2062    3.5941    0.0000 H   0  0  0  0  0  0  0  0  0  0  0  0
    3.1743    3.9054    0.0000 H   0  0  0  0  0  0  0  0  0  0  0  0
    2.6707    4.4482    0.0000 H   0  0  0  0  0  0  0  0  0  0  0  0
    1.7567    3.1098    0.0000 H   0  0  0  0  0  0  0  0  0  0  0  0
    2.1985    4.4797    0.0000 H   0  0  0  0  0  0  0  0  0  0  0  0
    0.8650    5.7544    0.0000 H   0  0  0  0  0  0  0  0  0  0  0  0
   -0.1666    5.2092    0.0000 H   0  0  0  0  0  0  0  0  0  0  0  0
    0.3786    4.1777    0.0000 H   0  0  0  0  0  0  0  0  0  0  0  0
    2.8393    5.2531    0.0000 H   0  0  0  0  0  0  0  0  0  0  0  0
    2.2581    6.0723    0.0000 H   0  0  0  0  0  0  0  0  0  0  0  0
    1.3163    5.7229    0.0000 H   0  0  0  0  0  0  0  0  0  0  0  0
    5.3400    1.1996    0.0000 H   0  0  0  0  0  0  0  0  0  0  0  0
    6.0303    0.1567    0.0000 H   0  0  0  0  0  0  0  0  0  0  0  0
    3.7959   -1.6251    0.0000 H   0  0  0  0  0  0  0  0  0  0  0  0
    2.7671   -0.3351    0.0000 H   0  0  0  0  0  0  0  0  0  0  0  0
    6.3662   -2.0720    0.0000 H   0  0  0  0  0  0  0  0  0  0  0  0
    7.0590   -1.1333    0.0000 H   0  0  0  0  0  0  0  0  0  0  0  0
    6.1203   -0.4405    0.0000 H   0  0  0  0  0  0  0  0  0  0  0  0
  1  2  1  0  0  0  0
  2  3  2  0  0  0  0
  2  4  1  0  0  0  0
  5  4  1  6  0  0  0
  5  6  1  0  0  0  0
  6  7  1  0  0  0  0
  7  8  1  0  0  0  0
  8  9  4  0  0  0  0
  9 10  4  0  0  0  0
 10 11  4  0  0  0  0
 11 12  4  0  0  0  0
 12 13  4  0  0  0  0
  8 13  4  0  0  0  0
 13 14  1  0  0  0  0
 14 15  1  0  0  0  0
  5 15  1  0  0  0  0
 15 16  2  0  0  0  0
 14 17  1  0  0  0  0
 17 18  1  0  0  0  0
 18 19  1  0  0  0  0
 19 20  1  0  0  0  0
 19 21  1  0  0  0  0
  6 22  1  6  0  0  0
 22 23  4  0  0  0  0
 23 24  4  0  0  0  0
 24 25  4  0  0  0  0
 25 26  4  0  0  0  0
 26 27  4  0  0  0  0
 22 27  4  0  0  0  0
 25 28  1  0  0  0  0
 28 29  1  0  0  0  0
  1 30  1  0  0  0  0
  1 31  1  0  0  0  0
  1 32  1  0  0  0  0
  5 33  1  1  0  0  0
  6 34  1  1  0  0  0
  9 35  1  0  0  0  0
 10 36  1  0  0  0  0
 11 37  1  0  0  0  0
 12 38  1  0  0  0  0
 17 39  1  0  0  0  0
 17 40  1  0  0  0  0
 18 41  1  0  0  0  0
 18 42  1  0  0  0  0
 20 43  1  0  0  0  0
 20 44  1  0  0  0  0
 20 45  1  0  0  0  0
 21 46  1  0  0  0  0
 21 47  1  0  0  0  0
 21 48  1  0  0  0  0
 23 49  1  0  0  0  0
 24 50  1  0  0  0  0
 26 51  1  0  0  0  0
 27 52  1  0  0  0  0
 29 53  1  0  0  0  0
 29 54  1  0  0  0  0
 29 55  1  0  0  0  0
M  END
$$$$
5
  Mrv2314 01052423262D          

 71 72  0  0  0  0            999 V2000
   -0.7145   -2.2836    0.0000 C   0  0  0  0  0  0  0  0  0  0  0  0
   -0.3020   -2.9980    0.0000 C   0  0  0  0  0  0  0  0  0  0  0  0
    0.5230   -2.9980    0.0000 C   0  0  0  0  0  0  0  0  0  0  0  0
   -0.7145   -3.7125    0.0000 C   0  0  0  0  0  0  0  0  0  0  0  0
    0.0000   -4.1250    0.0000 C   0  0  0  0  0  0  0  0  0  0  0  0
    0.7145   -3.7125    0.0000 C   0  0  0  0  0  0  0  0  0  0  0  0
    1.4289   -4.1250    0.0000 C   0  0  0  0  0  0  0  0  0  0  0  0
    2.1434   -3.7125    0.0000 N   0  0  0  0  0  0  0  0  0  0  0  0
    2.1434   -2.8875    0.0000 C   0  0  0  0  0  0  0  0  0  0  0  0
    2.8579   -4.1250    0.0000 C   0  0  0  0  0  0  0  0  0  0  0  0
    3.5724   -3.7125    0.0000 C   0  0  0  0  0  0  0  0  0  0  0  0
    4.2868   -4.1250    0.0000 C   0  0  0  0  0  0  0  0  0  0  0  0
    5.0013   -3.7125    0.0000 C   0  0  0  0  0  0  0  0  0  0  0  0
    5.7158   -4.1250    0.0000 C   0  0  0  0  0  0  0  0  0  0  0  0
    5.7158   -4.9500    0.0000 C   0  0  0  0  0  0  0  0  0  0  0  0
    5.0013   -5.3625    0.0000 C   0  0  0  0  0  0  0  0  0  0  0  0
    4.2868   -4.9500    0.0000 C   0  0  0  0  0  0  0  0  0  0  0  0
    6.4302   -5.3625    0.0000 O   0  0  0  0  0  0  0  0  0  0  0  0
    6.4302   -6.1875    0.0000 C   0  0  0  0  0  0  0  0  0  0  0  0
    6.4302   -3.7125    0.0000 O   0  0  0  0  0  0  0  0  0  0  0  0
    7.1447   -4.1250    0.0000 C   0  0  0  0  0  0  0  0  0  0  0  0
   -1.1270   -4.4270    0.0000 C   0  0  0  0  0  0  0  0  0  0  0  0
   -1.5395   -5.1414    0.0000 N   0  0  0  0  0  0  0  0  0  0  0  0
   -1.4289   -3.3000    0.0000 C   0  0  0  0  0  0  0  0  0  0  0  0
   -2.1434   -3.7125    0.0000 C   0  0  0  0  0  0  0  0  0  0  0  0
   -2.8579   -3.3000    0.0000 C   0  0  0  0  0  0  0  0  0  0  0  0
   -2.8579   -2.4750    0.0000 C   0  0  0  0  0  0  0  0  0  0  0  0
   -2.1434   -2.0625    0.0000 C   0  0  0  0  0  0  0  0  0  0  0  0
   -1.4289   -2.4750    0.0000 C   0  0  0  0  0  0  0  0  0  0  0  0
   -3.5724   -2.0625    0.0000 O   0  0  0  0  0  0  0  0  0  0  0  0
   -4.2868   -2.4750    0.0000 C   0  0  0  0  0  0  0  0  0  0  0  0
   -3.5724   -3.7125    0.0000 O   0  0  0  0  0  0  0  0  0  0  0  0
   -4.2868   -3.3000    0.0000 C   0  0  0  0  0  0  0  0  0  0  0  0
    0.1088   -2.2296    0.0000 H   0  0  0  0  0  0  0  0  0  0  0  0
   -0.3988   -1.5214    0.0000 H   0  0  0  0  0  0  0  0  0  0  0  0
   -1.2584   -1.6633    0.0000 H   0  0  0  0  0  0  0  0  0  0  0  0
    0.1105   -3.7125    0.0000 H   0  0  0  0  0  0  0  0  0  0  0  0
    1.2603   -3.3683    0.0000 H   0  0  0  0  0  0  0  0  0  0  0  0
    1.2898   -2.6935    0.0000 H   0  0  0  0  0  0  0  0  0  0  0  0
    0.8052   -2.2228    0.0000 H   0  0  0  0  0  0  0  0  0  0  0  0
   -0.3703   -4.8622    0.0000 H   0  0  0  0  0  0  0  0  0  0  0  0
    0.3703   -4.8622    0.0000 H   0  0  0  0  0  0  0  0  0  0  0  0
    0.7145   -4.5375    0.0000 H   0  0  0  0  0  0  0  0  0  0  0  0
    0.0600   -3.2103    0.0000 H   0  0  0  0  0  0  0  0  0  0  0  0
    1.5722   -4.9375    0.0000 H   0  0  0  0  0  0  0  0  0  0  0  0
    2.0609   -4.6553    0.0000 H   0  0  0  0  0  0  0  0  0  0  0  0
    2.8868   -3.2453    0.0000 H   0  0  0  0  0  0  0  0  0  0  0  0
    2.7882   -2.3728    0.0000 H   0  0  0  0  0  0  0  0  0  0  0  0
    1.9593   -2.0833    0.0000 H   0  0  0  0  0  0  0  0  0  0  0  0
    2.8928   -4.9493    0.0000 H   0  0  0  0  0  0  0  0  0  0  0  0
    3.5809   -4.5223    0.0000 H   0  0  0  0  0  0  0  0  0  0  0  0
    4.2969   -3.3179    0.0000 H   0  0  0  0  0  0  0  0  0  0  0  0
    3.6134   -2.8885    0.0000 H   0  0  0  0  0  0  0  0  0  0  0  0
    5.4092   -2.9954    0.0000 H   0  0  0  0  0  0  0  0  0  0  0  0
    5.0013   -6.1875    0.0000 H   0  0  0  0  0  0  0  0  0  0  0  0
    3.8668   -5.6601    0.0000 H   0  0  0  0  0  0  0  0  0  0  0  0
    5.6052   -6.1875    0.0000 H   0  0  0  0  0  0  0  0  0  0  0  0
    6.4302   -7.0125    0.0000 H   0  0  0  0  0  0  0  0  0  0  0  0
    7.2552   -6.1875    0.0000 H   0  0  0  0  0  0  0  0  0  0  0  0
    6.7322   -4.8395    0.0000 H   0  0  0  0  0  0  0  0  0  0  0  0
    7.8592   -4.5375    0.0000 H   0  0  0  0  0  0  0  0  0  0  0  0
    7.5572   -3.4105    0.0000 H   0  0  0  0  0  0  0  0  0  0  0  0
   -2.1434   -4.5375    0.0000 H   0  0  0  0  0  0  0  0  0  0  0  0
   -2.1434   -1.2375    0.0000 H   0  0  0  0  0  0  0  0  0  0  0  0
   -2.1434   -2.8875    0.0000 H   0  0  0  0  0  0  0  0  0  0  0  0
   -4.2868   -1.6500    0.0000 H   0  0  0  0  0  0  0  0  0  0  0  0
   -5.0013   -2.0625    0.0000 H   0  0  0  0  0  0  0  0  0  0  0  0
   -5.0013   -2.8875    0.0000 H   0  0  0  0  0  0  0  0  0  0  0  0
   -4.9188   -3.8303    0.0000 H   0  0  0  0  0  0  0  0  0  0  0  0
   -4.4301   -4.1125    0.0000 H   0  0  0  0  0  0  0  0  0  0  0  0
   -3.5724   -2.8875    0.0000 H   0  0  0  0  0  0  0  0  0  0  0  0
  1  2  1  0  0  0  0
  2  3  1  0  0  0  0
  2  4  1  0  0  0  0
  4  5  1  0  0  0  0
  5  6  1  0  0  0  0
  6  7  1  0  0  0  0
  7  8  1  0  0  0  0
  8  9  1  0  0  0  0
  8 10  1  0  0  0  0
 10 11  1  0  0  0  0
 11 12  1  0  0  0  0
 12 13  4  0  0  0  0
 13 14  4  0  0  0  0
 14 15  4  0  0  0  0
 15 16  4  0  0  0  0
 16 17  4  0  0  0  0
 12 17  4  0  0  0  0
 15 18  1  0  0  0  0
 18 19  1  0  0  0  0
 14 20  1  0  0  0  0
 20 21  1  0  0  0  0
  4 22  1  0  0  0  0
 22 23  3  0  0  0  0
  4 24  1  0  0  0  0
 24 25  4  0  0  0  0
 25 26  4  0  0  0  0
 26 27  4  0  0  0  0
 27 28  4  0  0  0  0
 28 29  4  0  0  0  0
 24 29  4  0  0  0  0
 27 30  1  0  0  0  0
 30 31  1  0  0  0  0
 26 32  1  0  0  0  0
 32 33  1  0  0  0  0
  1 34  1  0  0  0  0
  1 35  1  0  0  0  0
  1 36  1  0  0  0  0
  2 37  1  0  0  0  0
  3 38  1  0  0  0  0
  3 39  1  0  0  0  0
  3 40  1  0  0  0  0
  5 41  1  0  0  0  0
  5 42  1  0  0  0  0
  6 43  1  0  0  0  0
  6 44  1  0  0  0  0
  7 45  1  0  0  0  0
  7 46  1  0  0  0  0
  9 47  1  0  0  0  0
  9 48  1  0  0  0  0
  9 49  1  0  0  0  0
 10 50  1  0  0  0  0
 10 51  1  0  0  0  0
 11 52  1  0  0  0  0
 11 53  1  0  0  0  0
 13 54  1  0  0  0  0
 16 55  1  0  0  0  0
 17 56  1  0  0  0  0
 19 57  1  0  0  0  0
 19 58  1  0  0  0  0
 19 59  1  0  0  0  0
 21 60  1  0  0  0  0
 21 61  1  0  0  0  0
 21 62  1  0  0  0  0
 25 63  1  0  0  0  0
 28 64  1  0  0  0  0
 29 65  1  0  0  0  0
 31 66  1  0  0  0  0
 31 67  1  0  0  0  0
 31 68  1  0  0  0  0
 33 69  1  0  0  0  0
 33 70  1  0  0  0  0
 33 71  1  0  0  0  0
M  END
$$$$
6
  Mrv2314 01052423262D          

 20 20  0  0  0  0            999 V2000
    0.0000    2.4750    0.0000 C   0  0  0  0  0  0  0  0  0  0  0  0
    0.7145    2.0625    0.0000 O   0  0  0  0  0  0  0  0  0  0  0  0
    0.7145    1.2375    0.0000 C   0  0  0  0  0  0  0  0  0  0  0  0
    1.4289    0.8250    0.0000 C   0  0  0  0  0  0  0  0  0  0  0  0
    1.4289   -0.0000    0.0000 C   0  0  0  0  0  0  0  0  0  0  0  0
    0.7145   -0.4125    0.0000 C   0  0  0  0  0  0  0  0  0  0  0  0
    0.0000    0.0000    0.0000 C   0  0  0  0  0  0  0  0  0  0  0  0
    0.0000    0.8250    0.0000 C   0  0  0  0  0  0  0  0  0  0  0  0
    0.7145   -1.2375    0.0000 C   0  0  0  0  0  0  0  0  0  0  0  0
    1.4289   -1.6500    0.0000 O   0  0  0  0  0  0  0  0  0  0  0  0
    0.4125    3.1895    0.0000 H   0  0  0  0  0  0  0  0  0  0  0  0
   -0.7145    2.8875    0.0000 H   0  0  0  0  0  0  0  0  0  0  0  0
   -0.4125    1.7605    0.0000 H   0  0  0  0  0  0  0  0  0  0  0  0
    2.1434    1.2375    0.0000 H   0  0  0  0  0  0  0  0  0  0  0  0
    2.1434   -0.4125    0.0000 H   0  0  0  0  0  0  0  0  0  0  0  0
   -0.7145   -0.4125    0.0000 H   0  0  0  0  0  0  0  0  0  0  0  0
   -0.7145    1.2375    0.0000 H   0  0  0  0  0  0  0  0  0  0  0  0
   -0.1091   -1.2855    0.0000 H   0  0  0  0  0  0  0  0  0  0  0  0
    0.2611   -1.9268    0.0000 H   0  0  0  0  0  0  0  0  0  0  0  0
    1.4289   -2.4750    0.0000 H   0  0  0  0  0  0  0  0  0  0  0  0
  1  2  1  0  0  0  0
  2  3  1  0  0  0  0
  3  4  4  0  0  0  0
  4  5  4  0  0  0  0
  5  6  4  0  0  0  0
  6  7  4  0  0  0  0
  7  8  4  0  0  0  0
  3  8  4  0  0  0  0
  6  9  1  0  0  0  0
  9 10  1  0  0  0  0
  1 11  1  0  0  0  0
  1 12  1  0  0  0  0
  1 13  1  0  0  0  0
  4 14  1  0  0  0  0
  5 15  1  0  0  0  0
  7 16  1  0  0  0  0
  8 17  1  0  0  0  0
  9 18  1  0  0  0  0
  9 19  1  0  0  0  0
 10 20  1  0  0  0  0
M  END
$$$$
7
  Mrv2314 01052423262D          

 47 47  0  0  1  0            999 V2000
    2.8579   -6.6000    0.0000 C   0  0  0  0  0  0  0  0  0  0  0  0
    3.5724   -6.1875    0.0000 C   0  0  0  0  0  0  0  0  0  0  0  0
    4.2868   -6.6000    0.0000 C   0  0  0  0  0  0  0  0  0  0  0  0
    5.0013   -6.1875    0.0000 C   0  0  0  0  0  0  0  0  0  0  0  0
    5.7158   -6.6000    0.0000 C   0  0  0  0  0  0  0  0  0  0  0  0
    6.4302   -6.1875    0.0000 C   0  0  1  0  0  0  0  0  0  0  0  0
    7.1447   -6.6000    0.0000 C   0  0  0  0  0  0  0  0  0  0  0  0
    7.8592   -6.1875    0.0000 C   0  0  0  0  0  0  0  0  0  0  0  0
    7.8592   -5.3625    0.0000 O   0  0  0  0  0  0  0  0  0  0  0  0
    8.5737   -6.6000    0.0000 C   0  0  0  0  0  0  0  0  0  0  0  0
    9.2881   -6.1875    0.0000 C   0  0  0  0  0  0  0  0  0  0  0  0
   10.0026   -6.6000    0.0000 C   0  0  0  0  0  0  0  0  0  0  0  0
   10.7171   -6.1875    0.0000 C   0  0  0  0  0  0  0  0  0  0  0  0
   11.4315   -6.6000    0.0000 C   0  0  0  0  0  0  0  0  0  0  0  0
   11.4315   -7.4250    0.0000 C   0  0  0  0  0  0  0  0  0  0  0  0
   10.7171   -7.8375    0.0000 C   0  0  0  0  0  0  0  0  0  0  0  0
   10.0026   -7.4250    0.0000 C   0  0  0  0  0  0  0  0  0  0  0  0
   12.1460   -7.8375    0.0000 O   0  0  0  0  0  0  0  0  0  0  0  0
   12.1460   -6.1875    0.0000 O   0  0  0  0  0  0  0  0  0  0  0  0
   12.8605   -6.6000    0.0000 C   0  0  0  0  0  0  0  0  0  0  0  0
    6.4302   -5.3625    0.0000 O   0  0  0  0  0  0  0  0  0  0  0  0
    2.4454   -5.8855    0.0000 H   0  0  0  0  0  0  0  0  0  0  0  0
    2.1434   -7.0125    0.0000 H   0  0  0  0  0  0  0  0  0  0  0  0
    3.2704   -7.3145    0.0000 H   0  0  0  0  0  0  0  0  0  0  0  0
    3.9426   -5.4503    0.0000 H   0  0  0  0  0  0  0  0  0  0  0  0
    3.2021   -5.4503    0.0000 H   0  0  0  0  0  0  0  0  0  0  0  0
    3.9166   -7.3372    0.0000 H   0  0  0  0  0  0  0  0  0  0  0  0
    4.6571   -7.3372    0.0000 H   0  0  0  0  0  0  0  0  0  0  0  0
    5.3716   -5.4503    0.0000 H   0  0  0  0  0  0  0  0  0  0  0  0
    4.6310   -5.4503    0.0000 H   0  0  0  0  0  0  0  0  0  0  0  0
    5.3455   -7.3372    0.0000 H   0  0  0  0  0  0  0  0  0  0  0  0
    6.0860   -7.3372    0.0000 H   0  0  0  0  0  0  0  0  0  0  0  0
    6.4302   -7.0125    0.0000 H   0  0  0  0  0  0  0  0  0  0  0  0
    7.2880   -7.4125    0.0000 H   0  0  0  0  0  0  0  0  0  0  0  0
    7.7767   -7.1303    0.0000 H   0  0  0  0  0  0  0  0  0  0  0  0
    8.6086   -7.4243    0.0000 H   0  0  0  0  0  0  0  0  0  0  0  0
    9.2967   -6.9973    0.0000 H   0  0  0  0  0  0  0  0  0  0  0  0
    9.6584   -5.4503    0.0000 H   0  0  0  0  0  0  0  0  0  0  0  0
    8.9179   -5.4503    0.0000 H   0  0  0  0  0  0  0  0  0  0  0  0
   10.7171   -5.3625    0.0000 H   0  0  0  0  0  0  0  0  0  0  0  0
   10.7171   -8.6625    0.0000 H   0  0  0  0  0  0  0  0  0  0  0  0
    9.5826   -8.1351    0.0000 H   0  0  0  0  0  0  0  0  0  0  0  0
   12.1460   -8.6625    0.0000 H   0  0  0  0  0  0  0  0  0  0  0  0
   12.4480   -7.3145    0.0000 H   0  0  0  0  0  0  0  0  0  0  0  0
   13.5749   -7.0125    0.0000 H   0  0  0  0  0  0  0  0  0  0  0  0
   13.2730   -5.8855    0.0000 H   0  0  0  0  0  0  0  0  0  0  0  0
    7.1447   -4.9500    0.0000 H   0  0  0  0  0  0  0  0  0  0  0  0
  1  2  1  0  0  0  0
  2  3  1  0  0  0  0
  3  4  1  0  0  0  0
  4  5  1  0  0  0  0
  6  5  1  0  0  0  0
  6  7  1  0  0  0  0
  7  8  1  0  0  0  0
  8  9  2  0  0  0  0
  8 10  1  0  0  0  0
 10 11  1  0  0  0  0
 11 12  1  0  0  0  0
 12 13  4  0  0  0  0
 13 14  4  0  0  0  0
 14 15  4  0  0  0  0
 15 16  4  0  0  0  0
 16 17  4  0  0  0  0
 12 17  4  0  0  0  0
 15 18  1  0  0  0  0
 14 19  1  0  0  0  0
 19 20  1  0  0  0  0
  6 21  1  0  0  0  0
  1 22  1  0  0  0  0
  1 23  1  0  0  0  0
  1 24  1  0  0  0  0
  2 25  1  0  0  0  0
  2 26  1  0  0  0  0
  3 27  1  0  0  0  0
  3 28  1  0  0  0  0
  4 29  1  0  0  0  0
  4 30  1  0  0  0  0
  5 31  1  0  0  0  0
  5 32  1  0  0  0  0
  6 33  1  1  0  0  0
  7 34  1  0  0  0  0
  7 35  1  0  0  0  0
 10 36  1  0  0  0  0
 10 37  1  0  0  0  0
 11 38  1  0  0  0  0
 11 39  1  0  0  0  0
 13 40  1  0  0  0  0
 16 41  1  0  0  0  0
 17 42  1  0  0  0  0
 18 43  1  0  0  0  0
 20 44  1  0  0  0  0
 20 45  1  0  0  0  0
 20 46  1  0  0  0  0
 21 47  1  0  0  0  0
M  END
$$$$
8
  Mrv2314 01052423262D          

 52 54  0  0  1  0            999 V2000
    3.5724   -6.7914    0.0000 C   0  0  0  0  0  0  0  0  0  0  0  0
    3.1599   -6.0770    0.0000 C   0  0  0  0  0  0  0  0  0  0  0  0
    2.3349   -6.0770    0.0000 C   0  0  0  0  0  0  0  0  0  0  0  0
    3.5724   -5.3625    0.0000 C   0  0  2  0  0  0  0  0  0  0  0  0
    3.1599   -4.6480    0.0000 C   0  0  0  0  0  0  0  0  0  0  0  0
    2.3349   -4.6480    0.0000 C   0  0  0  0  0  0  0  0  0  0  0  0
    1.9224   -3.9336    0.0000 C   0  0  0  0  0  0  0  0  0  0  0  0
    2.3349   -3.2191    0.0000 C   0  0  0  0  0  0  0  0  0  0  0  0
    3.1599   -3.2191    0.0000 C   0  0  0  0  0  0  0  0  0  0  0  0
    3.5724   -3.9336    0.0000 C   0  0  0  0  0  0  0  0  0  0  0  0
    1.9224   -2.5046    0.0000 Cl  0  0  0  0  0  0  0  0  0  0  0  0
    4.3974   -5.3625    0.0000 C   0  0  0  0  0  0  0  0  0  0  0  0
    4.8099   -4.6480    0.0000 O   0  0  0  0  0  0  0  0  0  0  0  0
    4.8099   -6.0770    0.0000 O   0  0  0  0  0  0  0  0  0  0  0  0
    5.6349   -6.0770    0.0000 C   0  0  1  0  0  0  0  0  0  0  0  0
    6.0474   -5.3625    0.0000 C   0  0  0  0  0  0  0  0  0  0  0  0
    6.4599   -4.6480    0.0000 N   0  0  0  0  0  0  0  0  0  0  0  0
    6.0474   -6.7914    0.0000 C   0  0  0  0  0  0  0  0  0  0  0  0
    6.8724   -6.7914    0.0000 C   0  0  0  0  0  0  0  0  0  0  0  0
    7.2849   -7.5059    0.0000 C   0  0  0  0  0  0  0  0  0  0  0  0
    6.8724   -8.2204    0.0000 C   0  0  0  0  0  0  0  0  0  0  0  0
    6.0474   -8.2204    0.0000 C   0  0  0  0  0  0  0  0  0  0  0  0
    5.6349   -7.5059    0.0000 C   0  0  0  0  0  0  0  0  0  0  0  0
    8.1099   -7.5059    0.0000 O   0  0  0  0  0  0  0  0  0  0  0  0
    8.5224   -8.2204    0.0000 C   0  0  0  0  0  0  0  0  0  0  0  0
    9.3474   -8.2204    0.0000 C   0  0  0  0  0  0  0  0  0  0  0  0
    9.7599   -8.9349    0.0000 C   0  0  0  0  0  0  0  0  0  0  0  0
    9.3474   -9.6493    0.0000 C   0  0  0  0  0  0  0  0  0  0  0  0
    8.5224   -9.6493    0.0000 C   0  0  0  0  0  0  0  0  0  0  0  0
    8.1099   -8.9349    0.0000 C   0  0  0  0  0  0  0  0  0  0  0  0
    2.8579   -7.2039    0.0000 H   0  0  0  0  0  0  0  0  0  0  0  0
    3.9849   -7.5059    0.0000 H   0  0  0  0  0  0  0  0  0  0  0  0
    4.2868   -6.3789    0.0000 H   0  0  0  0  0  0  0  0  0  0  0  0
    2.7474   -6.7914    0.0000 H   0  0  0  0  0  0  0  0  0  0  0  0
    2.5484   -5.2801    0.0000 H   0  0  0  0  0  0  0  0  0  0  0  0
    1.6204   -5.6645    0.0000 H   0  0  0  0  0  0  0  0  0  0  0  0
    1.7515   -6.6603    0.0000 H   0  0  0  0  0  0  0  0  0  0  0  0
    2.7474   -5.3625    0.0000 H   0  0  0  0  0  0  0  0  0  0  0  0
    1.5831   -4.9880    0.0000 H   0  0  0  0  0  0  0  0  0  0  0  0
    1.0974   -3.9336    0.0000 H   0  0  0  0  0  0  0  0  0  0  0  0
    3.5724   -2.5046    0.0000 H   0  0  0  0  0  0  0  0  0  0  0  0
    4.3974   -3.9336    0.0000 H   0  0  0  0  0  0  0  0  0  0  0  0
    5.2224   -5.3625    0.0000 H   0  0  0  0  0  0  0  0  0  0  0  0
    7.2849   -6.0770    0.0000 H   0  0  0  0  0  0  0  0  0  0  0  0
    7.2849   -8.9349    0.0000 H   0  0  0  0  0  0  0  0  0  0  0  0
    5.6349   -8.9349    0.0000 H   0  0  0  0  0  0  0  0  0  0  0  0
    4.8099   -7.5059    0.0000 H   0  0  0  0  0  0  0  0  0  0  0  0
    9.7599   -7.5059    0.0000 H   0  0  0  0  0  0  0  0  0  0  0  0
   10.5849   -8.9349    0.0000 H   0  0  0  0  0  0  0  0  0  0  0  0
    9.7599  -10.3638    0.0000 H   0  0  0  0  0  0  0  0  0  0  0  0
    8.1099  -10.3638    0.0000 H   0  0  0  0  0  0  0  0  0  0  0  0
    7.6974   -8.2204    0.0000 H   0  0  0  0  0  0  0  0  0  0  0  0
  1  2  1  0  0  0  0
  2  3  1  0  0  0  0
  4  2  1  0  0  0  0
  4  5  1  0  0  0  0
  5  6  4  0  0  0  0
  6  7  4  0  0  0  0
  7  8  4  0  0  0  0
  8  9  4  0  0  0  0
  9 10  4  0  0  0  0
  5 10  4  0  0  0  0
  8 11  1  0  0  0  0
  4 12  1  0  0  0  0
 12 13  2  0  0  0  0
 12 14  1  0  0  0  0
 15 14  1  0  0  0  0
 15 16  1  0  0  0  0
 16 17  3  0  0  0  0
 15 18  1  0  0  0  0
 18 19  4  0  0  0  0
 19 20  4  0  0  0  0
 20 21  4  0  0  0  0
 21 22  4  0  0  0  0
 22 23  4  0  0  0  0
 18 23  4  0  0  0  0
 20 24  1  0  0  0  0
 24 25  1  0  0  0  0
 25 26  4  0  0  0  0
 26 27  4  0  0  0  0
 27 28  4  0  0  0  0
 28 29  4  0  0  0  0
 29 30  4  0  0  0  0
 25 30  4  0  0  0  0
  1 31  1  0  0  0  0
  1 32  1  0  0  0  0
  1 33  1  0  0  0  0
  2 34  1  0  0  0  0
  3 35  1  0  0  0  0
  3 36  1  0  0  0  0
  3 37  1  0  0  0  0
  4 38  1  1  0  0  0
  6 39  1  0  0  0  0
  7 40  1  0  0  0  0
  9 41  1  0  0  0  0
 10 42  1  0  0  0  0
 15 43  1  6  0  0  0
 19 44  1  0  0  0  0
 21 45  1  0  0  0  0
 22 46  1  0  0  0  0
 23 47  1  0  0  0  0
 26 48  1  0  0  0  0
 27 49  1  0  0  0  0
 28 50  1  0  0  0  0
 29 51  1  0  0  0  0
 30 52  1  0  0  0  0
M  END
$$$$
9
  Mrv2314 01052423262D          

 39 41  0  0  1  0            999 V2000
    0.6320   -0.4441    0.0000 C   0  0  0  0  0  0  0  0  0  0  0  0
    1.1841   -1.0572    0.0000 C   0  0  2  0  0  0  0  0  0  0  0  0
    1.8515   -1.5422    0.0000 C   0  0  0  0  0  0  0  0  0  0  0  0
    2.6361   -1.2872    0.0000 O   0  0  0  0  0  0  0  0  0  0  0  0
    1.5966   -2.3268    0.0000 N   0  0  0  0  0  0  0  0  0  0  0  0
    0.7716   -2.3268    0.0000 C   0  0  0  0  0  0  0  0  0  0  0  0
    0.5166   -1.5422    0.0000 N   0  0  0  0  0  0  0  0  0  0  0  0
    0.2866   -2.9942    0.0000 S   0  0  0  0  0  0  0  0  0  0  0  0
   -0.5338   -2.9080    0.0000 C   0  0  0  0  0  0  0  0  0  0  0  0
    2.0815   -2.9942    0.0000 N   0  0  0  0  0  0  0  0  0  0  0  0
    1.7459   -3.7479    0.0000 C   0  0  0  0  0  0  0  0  0  0  0  0
    2.2308   -4.4153    0.0000 C   0  0  0  0  0  0  0  0  0  0  0  0
    1.8953   -5.1690    0.0000 C   0  0  0  0  0  0  0  0  0  0  0  0
    1.0748   -5.2553    0.0000 C   0  0  0  0  0  0  0  0  0  0  0  0
    0.5899   -4.5878    0.0000 C   0  0  0  0  0  0  0  0  0  0  0  0
    0.9254   -3.8341    0.0000 C   0  0  0  0  0  0  0  0  0  0  0  0
    1.7361   -0.4441    0.0000 C   0  0  0  0  0  0  0  0  0  0  0  0
    1.4812    0.3405    0.0000 C   0  0  0  0  0  0  0  0  0  0  0  0
    2.0332    0.9536    0.0000 C   0  0  0  0  0  0  0  0  0  0  0  0
    2.8402    0.7820    0.0000 C   0  0  0  0  0  0  0  0  0  0  0  0
    3.0951   -0.0026    0.0000 C   0  0  0  0  0  0  0  0  0  0  0  0
    2.5431   -0.6157    0.0000 C   0  0  0  0  0  0  0  0  0  0  0  0
    1.2451    0.1079    0.0000 H   0  0  0  0  0  0  0  0  0  0  0  0
    0.0800    0.1689    0.0000 H   0  0  0  0  0  0  0  0  0  0  0  0
    0.0189   -0.9962    0.0000 H   0  0  0  0  0  0  0  0  0  0  0  0
   -0.4476   -2.0875    0.0000 H   0  0  0  0  0  0  0  0  0  0  0  0
   -1.3543   -2.8218    0.0000 H   0  0  0  0  0  0  0  0  0  0  0  0
   -0.6201   -3.7285    0.0000 H   0  0  0  0  0  0  0  0  0  0  0  0
    2.9020   -2.9080    0.0000 H   0  0  0  0  0  0  0  0  0  0  0  0
    3.0513   -4.3291    0.0000 H   0  0  0  0  0  0  0  0  0  0  0  0
    2.3802   -5.8365    0.0000 H   0  0  0  0  0  0  0  0  0  0  0  0
    0.7392   -6.0089    0.0000 H   0  0  0  0  0  0  0  0  0  0  0  0
   -0.2306   -4.6740    0.0000 H   0  0  0  0  0  0  0  0  0  0  0  0
    0.4405   -3.1667    0.0000 H   0  0  0  0  0  0  0  0  0  0  0  0
    0.8848    0.9106    0.0000 H   0  0  0  0  0  0  0  0  0  0  0  0
    1.7782    1.7382    0.0000 H   0  0  0  0  0  0  0  0  0  0  0  0
    3.3922    1.3951    0.0000 H   0  0  0  0  0  0  0  0  0  0  0  0
    3.9021   -0.1741    0.0000 H   0  0  0  0  0  0  0  0  0  0  0  0
    3.3318   -0.8576    0.0000 H   0  0  0  0  0  0  0  0  0  0  0  0
  2  1  1  6  0  0  0
  2  3  1  0  0  0  0
  3  4  2  0  0  0  0
  3  5  1  0  0  0  0
  5  6  1  0  0  0  0
  6  7  2  0  0  0  0
  2  7  1  0  0  0  0
  6  8  1  0  0  0  0
  8  9  1  0  0  0  0
  5 10  1  0  0  0  0
 10 11  1  0  0  0  0
 11 12  4  0  0  0  0
 12 13  4  0  0  0  0
 13 14  4  0  0  0  0
 14 15  4  0  0  0  0
 15 16  4  0  0  0  0
 11 16  4  0  0  0  0
  2 17  1  1  0  0  0
 17 18  4  0  0  0  0
 18 19  4  0  0  0  0
 19 20  4  0  0  0  0
 20 21  4  0  0  0  0
 21 22  4  0  0  0  0
 17 22  4  0  0  0  0
  1 23  1  0  0  0  0
  1 24  1  0  0  0  0
  1 25  1  0  0  0  0
  9 26  1  0  0  0  0
  9 27  1  0  0  0  0
  9 28  1  0  0  0  0
 10 29  1  0  0  0  0
 12 30  1  0  0  0  0
 13 31  1  0  0  0  0
 14 32  1  0  0  0  0
 15 33  1  0  0  0  0
 16 34  1  0  0  0  0
 18 35  1  0  0  0  0
 19 36  1  0  0  0  0
 20 37  1  0  0  0  0
 21 38  1  0  0  0  0
 22 39  1  0  0  0  0
M  END
$$$$
10
  Mrv2314 01052423262D          

 40 41  0  0  1  0            999 V2000
    4.2868    0.0000    0.0000 C   0  0  0  0  0  0  0  0  0  0  0  0
    5.0013    0.4125    0.0000 C   0  0  0  0  0  0  0  0  0  0  0  0
    5.0013    1.2375    0.0000 C   0  0  0  0  0  0  0  0  0  0  0  0
    5.7158    0.0000    0.0000 N   0  0  0  0  0  0  0  0  0  0  0  0
    6.4302    0.4125    0.0000 C   0  0  0  0  0  0  0  0  0  0  0  0
    7.1447    0.0000    0.0000 C   0  0  1  0  0  0  0  0  0  0  0  0
    7.8592    0.4125    0.0000 C   0  0  0  0  0  0  0  0  0  0  0  0
    8.5737    0.0000    0.0000 O   0  0  0  0  0  0  0  0  0  0  0  0
    9.2881    0.4125    0.0000 C   0  0  0  0  0  0  0  0  0  0  0  0
    9.2881    1.2375    0.0000 C   0  0  0  0  0  0  0  0  0  0  0  0
   10.0026    1.6500    0.0000 C   0  0  0  0  0  0  0  0  0  0  0  0
   10.7171    1.2375    0.0000 C   0  0  0  0  0  0  0  0  0  0  0  0
   10.7171    0.4125    0.0000 C   0  0  0  0  0  0  0  0  0  0  0  0
   11.4315    0.0000    0.0000 C   0  0  0  0  0  0  0  0  0  0  0  0
   11.4315   -0.8250    0.0000 C   0  0  0  0  0  0  0  0  0  0  0  0
   10.7171   -1.2375    0.0000 C   0  0  0  0  0  0  0  0  0  0  0  0
   10.0026   -0.8250    0.0000 C   0  0  0  0  0  0  0  0  0  0  0  0
   10.0026    0.0000    0.0000 C   0  0  0  0  0  0  0  0  0  0  0  0
    7.1447   -0.8250    0.0000 O   0  0  0  0  0  0  0  0  0  0  0  0
    3.8743    0.7145    0.0000 H   0  0  0  0  0  0  0  0  0  0  0  0
    3.5724   -0.4125    0.0000 H   0  0  0  0  0  0  0  0  0  0  0  0
    4.6993   -0.7145    0.0000 H   0  0  0  0  0  0  0  0  0  0  0  0
    4.2868    0.8250    0.0000 H   0  0  0  0  0  0  0  0  0  0  0  0
    5.7982    1.0240    0.0000 H   0  0  0  0  0  0  0  0  0  0  0  0
    5.4138    1.9520    0.0000 H   0  0  0  0  0  0  0  0  0  0  0  0
    4.4179    1.8209    0.0000 H   0  0  0  0  0  0  0  0  0  0  0  0
    5.7158   -0.8250    0.0000 H   0  0  0  0  0  0  0  0  0  0  0  0
    6.9270    1.0711    0.0000 H   0  0  0  0  0  0  0  0  0  0  0  0
    6.4302   -0.4125    0.0000 H   0  0  0  0  0  0  0  0  0  0  0  0
    7.1447    0.8250    0.0000 H   0  0  0  0  0  0  0  0  0  0  0  0
    8.4912    0.9428    0.0000 H   0  0  0  0  0  0  0  0  0  0  0  0
    8.0024    1.2250    0.0000 H   0  0  0  0  0  0  0  0  0  0  0  0
    8.9375    1.9843    0.0000 H   0  0  0  0  0  0  0  0  0  0  0  0
   10.0026    2.4750    0.0000 H   0  0  0  0  0  0  0  0  0  0  0  0
   11.4315    1.6500    0.0000 H   0  0  0  0  0  0  0  0  0  0  0  0
   12.1460    0.4125    0.0000 H   0  0  0  0  0  0  0  0  0  0  0  0
   12.1460   -1.2375    0.0000 H   0  0  0  0  0  0  0  0  0  0  0  0
   10.7171   -2.0625    0.0000 H   0  0  0  0  0  0  0  0  0  0  0  0
    9.2881   -1.2375    0.0000 H   0  0  0  0  0  0  0  0  0  0  0  0
    7.5572   -1.5395    0.0000 H   0  0  0  0  0  0  0  0  0  0  0  0
  1  2  1  0  0  0  0
  2  3  1  0  0  0  0
  2  4  1  0  0  0  0
  4  5  1  0  0  0  0
  6  5  1  0  0  0  0
  6  7  1  0  0  0  0
  7  8  1  0  0  0  0
  8  9  1  0  0  0  0
  9 10  4  0  0  0  0
 10 11  4  0  0  0  0
 11 12  4  0  0  0  0
 12 13  4  0  0  0  0
 13 14  4  0  0  0  0
 14 15  4  0  0  0  0
 15 16  4  0  0  0  0
 16 17  4  0  0  0  0
 17 18  4  0  0  0  0
 13 18  4  0  0  0  0
  9 18  4  0  0  0  0
  6 19  1  0  0  0  0
  1 20  1  0  0  0  0
  1 21  1  0  0  0  0
  1 22  1  0  0  0  0
  2 23  1  0  0  0  0
  3 24  1  0  0  0  0
  3 25  1  0  0  0  0
  3 26  1  0  0  0  0
  4 27  1  0  0  0  0
  5 28  1  0  0  0  0
  5 29  1  0  0  0  0
  6 30  1  6  0  0  0
  7 31  1  0  0  0  0
  7 32  1  0  0  0  0
 10 33  1  0  0  0  0
 11 34  1  0  0  0  0
 12 35  1  0  0  0  0
 14 36  1  0  0  0  0
 15 37  1  0  0  0  0
 16 38  1  0  0  0  0
 17 39  1  0  0  0  0
 19 40  1  0  0  0  0
M  END
$$$$
11
  Mrv2314 01052423262D          

 45 46  0  0  1  0            999 V2000
    3.5724    2.8875    0.0000 C   0  0  0  0  0  0  0  0  0  0  0  0
    2.8579    2.4750    0.0000 C   0  0  0  0  0  0  0  0  0  0  0  0
    2.4454    3.1895    0.0000 C   0  0  0  0  0  0  0  0  0  0  0  0
    3.2704    1.7605    0.0000 C   0  0  0  0  0  0  0  0  0  0  0  0
    2.1434    2.0625    0.0000 N   0  0  0  0  0  0  0  0  0  0  0  0
    2.1434    1.2375    0.0000 C   0  0  0  0  0  0  0  0  0  0  0  0
    1.4289    0.8250    0.0000 C   0  0  1  0  0  0  0  0  0  0  0  0
    1.4289   -0.0000    0.0000 C   0  0  0  0  0  0  0  0  0  0  0  0
    0.7145   -0.4125    0.0000 O   0  0  0  0  0  0  0  0  0  0  0  0
    0.7145   -1.2375    0.0000 C   0  0  0  0  0  0  0  0  0  0  0  0
    1.3819   -1.7224    0.0000 N   0  0  0  0  0  0  0  0  0  0  0  0
    1.1270   -2.5070    0.0000 S   0  0  0  0  0  0  0  0  0  0  0  0
    0.3020   -2.5070    0.0000 N   0  0  0  0  0  0  0  0  0  0  0  0
    0.0470   -1.7224    0.0000 C   0  0  0  0  0  0  0  0  0  0  0  0
   -0.7376   -1.4675    0.0000 N   0  0  0  0  0  0  0  0  0  0  0  0
   -1.3507   -2.0195    0.0000 C   0  0  0  0  0  0  0  0  0  0  0  0
   -2.1353   -1.7646    0.0000 C   0  0  0  0  0  0  0  0  0  0  0  0
   -2.3068   -0.9576    0.0000 O   0  0  0  0  0  0  0  0  0  0  0  0
   -1.6937   -0.4056    0.0000 C   0  0  0  0  0  0  0  0  0  0  0  0
   -0.9091   -0.6605    0.0000 C   0  0  0  0  0  0  0  0  0  0  0  0
    0.7145    1.2375    0.0000 O   0  0  0  0  0  0  0  0  0  0  0  0
    3.9849    2.1730    0.0000 H   0  0  0  0  0  0  0  0  0  0  0  0
    4.2868    3.3000    0.0000 H   0  0  0  0  0  0  0  0  0  0  0  0
    3.1599    3.6020    0.0000 H   0  0  0  0  0  0  0  0  0  0  0  0
    2.3377    4.0074    0.0000 H   0  0  0  0  0  0  0  0  0  0  0  0
    1.6485    3.4030    0.0000 H   0  0  0  0  0  0  0  0  0  0  0  0
    1.9432    2.5350    0.0000 H   0  0  0  0  0  0  0  0  0  0  0  0
    2.4524    1.6528    0.0000 H   0  0  0  0  0  0  0  0  0  0  0  0
    3.0569    0.9636    0.0000 H   0  0  0  0  0  0  0  0  0  0  0  0
    3.9249    1.2583    0.0000 H   0  0  0  0  0  0  0  0  0  0  0  0
    1.3349    1.8982    0.0000 H   0  0  0  0  0  0  0  0  0  0  0  0
    2.2390    0.4181    0.0000 H   0  0  0  0  0  0  0  0  0  0  0  0
    1.4289    1.6500    0.0000 H   0  0  0  0  0  0  0  0  0  0  0  0
    0.7145    0.4125    0.0000 H   0  0  0  0  0  0  0  0  0  0  0  0
    1.4160   -0.8249    0.0000 H   0  0  0  0  0  0  0  0  0  0  0  0
    2.1301   -0.4348    0.0000 H   0  0  0  0  0  0  0  0  0  0  0  0
   -1.5596   -2.8176    0.0000 H   0  0  0  0  0  0  0  0  0  0  0  0
   -0.8352   -2.6637    0.0000 H   0  0  0  0  0  0  0  0  0  0  0  0
   -2.9309   -1.9827    0.0000 H   0  0  0  0  0  0  0  0  0  0  0  0
   -2.4354   -2.5330    0.0000 H   0  0  0  0  0  0  0  0  0  0  0  0
   -1.4849    0.3925    0.0000 H   0  0  0  0  0  0  0  0  0  0  0  0
   -2.2092    0.2386    0.0000 H   0  0  0  0  0  0  0  0  0  0  0  0
   -0.1135   -0.4424    0.0000 H   0  0  0  0  0  0  0  0  0  0  0  0
   -0.6090    0.1080    0.0000 H   0  0  0  0  0  0  0  0  0  0  0  0
   -0.0526    1.5412    0.0000 H   0  0  0  0  0  0  0  0  0  0  0  0
  1  2  1  0  0  0  0
  2  3  1  0  0  0  0
  2  4  1  0  0  0  0
  2  5  1  0  0  0  0
  5  6  1  0  0  0  0
  7  6  1  0  0  0  0
  7  8  1  0  0  0  0
  8  9  1  0  0  0  0
  9 10  1  0  0  0  0
 10 11  4  0  0  0  0
 11 12  4  0  0  0  0
 12 13  4  0  0  0  0
 13 14  4  0  0  0  0
 10 14  4  0  0  0  0
 14 15  1  0  0  0  0
 15 16  1  0  0  0  0
 16 17  1  0  0  0  0
 17 18  1  0  0  0  0
 18 19  1  0  0  0  0
 19 20  1  0  0  0  0
 15 20  1  0  0  0  0
  7 21  1  0  0  0  0
  1 22  1  0  0  0  0
  1 23  1  0  0  0  0
  1 24  1  0  0  0  0
  3 25  1  0  0  0  0
  3 26  1  0  0  0  0
  3 27  1  0  0  0  0
  4 28  1  0  0  0  0
  4 29  1  0  0  0  0
  4 30  1  0  0  0  0
  5 31  1  0  0  0  0
  6 32  1  0  0  0  0
  6 33  1  0  0  0  0
  7 34  1  6  0  0  0
  8 35  1  0  0  0  0
  8 36  1  0  0  0  0
 16 37  1  0  0  0  0
 16 38  1  0  0  0  0
 17 39  1  0  0  0  0
 17 40  1  0  0  0  0
 19 41  1  0  0  0  0
 19 42  1  0  0  0  0
 20 43  1  0  0  0  0
 20 44  1  0  0  0  0
 21 45  1  0  0  0  0
M  END
$$$$
12
  Mrv2314 01052423262D          

 39 41  0  0  1  0            999 V2000
   -0.7145    2.0625    0.0000 C   0  0  0  0  0  0  0  0  0  0  0  0
   -0.7145    1.2375    0.0000 C   0  0  0  0  0  0  0  0  0  0  0  0
   -1.4289    0.8250    0.0000 O   0  0  0  0  0  0  0  0  0  0  0  0
    0.0000    0.8250    0.0000 C   0  0  0  0  0  0  0  0  0  0  0  0
    0.0000   -0.0000    0.0000 C   0  0  1  0  0  0  0  0  0  0  0  0
   -0.7145   -0.4125    0.0000 C   0  0  0  0  0  0  0  0  0  0  0  0
   -0.7145   -1.2375    0.0000 C   0  0  0  0  0  0  0  0  0  0  0  0
   -1.4289   -1.6500    0.0000 C   0  0  0  0  0  0  0  0  0  0  0  0
   -2.1434   -1.2375    0.0000 C   0  0  0  0  0  0  0  0  0  0  0  0
   -2.1434   -0.4125    0.0000 C   0  0  0  0  0  0  0  0  0  0  0  0
   -1.4289   -0.0000    0.0000 C   0  0  0  0  0  0  0  0  0  0  0  0
    0.7145   -0.4125    0.0000 C   0  0  0  0  0  0  0  0  0  0  0  0
    1.4289    0.0000    0.0000 C   0  0  0  0  0  0  0  0  0  0  0  0
    2.1434   -0.4125    0.0000 C   0  0  0  0  0  0  0  0  0  0  0  0
    2.8579    0.0000    0.0000 C   0  0  0  0  0  0  0  0  0  0  0  0
    3.5724   -0.4125    0.0000 C   0  0  0  0  0  0  0  0  0  0  0  0
    3.5724   -1.2375    0.0000 C   0  0  0  0  0  0  0  0  0  0  0  0
    2.8579   -1.6500    0.0000 C   0  0  0  0  0  0  0  0  0  0  0  0
    2.1434   -1.2375    0.0000 C   0  0  0  0  0  0  0  0  0  0  0  0
    1.4289   -1.6500    0.0000 O   0  0  0  0  0  0  0  0  0  0  0  0
    0.7145   -1.2375    0.0000 C   0  0  0  0  0  0  0  0  0  0  0  0
    0.0000   -1.6500    0.0000 O   0  0  0  0  0  0  0  0  0  0  0  0
    1.4289    0.8250    0.0000 O   0  0  0  0  0  0  0  0  0  0  0  0
    0.1105    2.0625    0.0000 H   0  0  0  0  0  0  0  0  0  0  0  0
   -0.7145    2.8875    0.0000 H   0  0  0  0  0  0  0  0  0  0  0  0
   -1.5395    2.0625    0.0000 H   0  0  0  0  0  0  0  0  0  0  0  0
    0.8236    0.8730    0.0000 H   0  0  0  0  0  0  0  0  0  0  0  0
    0.4533    1.5143    0.0000 H   0  0  0  0  0  0  0  0  0  0  0  0
   -0.7145    0.4125    0.0000 H   0  0  0  0  0  0  0  0  0  0  0  0
    0.0000   -0.8250    0.0000 H   0  0  0  0  0  0  0  0  0  0  0  0
   -1.4289   -2.4750    0.0000 H   0  0  0  0  0  0  0  0  0  0  0  0
   -2.8579   -1.6500    0.0000 H   0  0  0  0  0  0  0  0  0  0  0  0
   -2.8579   -0.0000    0.0000 H   0  0  0  0  0  0  0  0  0  0  0  0
   -1.4289   -0.8250    0.0000 H   0  0  0  0  0  0  0  0  0  0  0  0
    2.8579    0.8250    0.0000 H   0  0  0  0  0  0  0  0  0  0  0  0
    4.2868   -0.0000    0.0000 H   0  0  0  0  0  0  0  0  0  0  0  0
    4.2868   -1.6500    0.0000 H   0  0  0  0  0  0  0  0  0  0  0  0
    2.8579   -2.4750    0.0000 H   0  0  0  0  0  0  0  0  0  0  0  0
    2.0349    1.3848    0.0000 H   0  0  0  0  0  0  0  0  0  0  0  0
  1  2  1  0  0  0  0
  2  3  2  0  0  0  0
  2  4  1  0  0  0  0
  5  4  1  0  0  0  0
  5  6  1  0  0  0  0
  6  7  4  0  0  0  0
  7  8  4  0  0  0  0
  8  9  4  0  0  0  0
  9 10  4  0  0  0  0
 10 11  4  0  0  0  0
  6 11  4  0  0  0  0
  5 12  1  0  0  0  0
 12 13  2  0  0  0  0
 13 14  1  0  0  0  0
 14 15  4  0  0  0  0
 15 16  4  0  0  0  0
 16 17  4  0  0  0  0
 17 18  4  0  0  0  0
 18 19  4  0  0  0  0
 14 19  4  0  0  0  0
 19 20  1  0  0  0  0
 20 21  1  0  0  0  0
 12 21  1  0  0  0  0
 21 22  2  0  0  0  0
 13 23  1  0  0  0  0
  1 24  1  0  0  0  0
  1 25  1  0  0  0  0
  1 26  1  0  0  0  0
  4 27  1  0  0  0  0
  4 28  1  0  0  0  0
  5 29  1  1  0  0  0
  7 30  1  0  0  0  0
  8 31  1  0  0  0  0
  9 32  1  0  0  0  0
 10 33  1  0  0  0  0
 11 34  1  0  0  0  0
 15 35  1  0  0  0  0
 16 36  1  0  0  0  0
 17 37  1  0  0  0  0
 18 38  1  0  0  0  0
 23 39  1  0  0  0  0
M  END
$$$$
13
  Mrv2314 01052423262D          

 29 28  0  0  0  0            999 V2000
    2.4750   -2.8579    0.0000 C   0  0  0  0  0  0  0  0  0  0  0  0
    2.0625   -2.1434    0.0000 C   0  0  0  0  0  0  0  0  0  0  0  0
    2.4750   -1.4289    0.0000 C   0  0  0  0  0  0  0  0  0  0  0  0
    2.0625   -0.7145    0.0000 C   0  0  0  0  0  0  0  0  0  0  0  0
    1.2375   -0.7145    0.0000 C   0  0  0  0  0  0  0  0  0  0  0  0
    0.8250    0.0000    0.0000 C   0  0  0  0  0  0  0  0  0  0  0  0
    0.0000    0.0000    0.0000 C   0  0  0  0  0  0  0  0  0  0  0  0
   -0.4125   -0.7145    0.0000 C   0  0  0  0  0  0  0  0  0  0  0  0
    0.0000   -1.4289    0.0000 O   0  0  0  0  0  0  0  0  0  0  0  0
    1.2375    0.7145    0.0000 C   0  0  0  0  0  0  0  0  0  0  0  0
    1.2375   -2.1434    0.0000 C   0  0  0  0  0  0  0  0  0  0  0  0
    1.7605   -3.2704    0.0000 H   0  0  0  0  0  0  0  0  0  0  0  0
    2.8875   -3.5724    0.0000 H   0  0  0  0  0  0  0  0  0  0  0  0
    3.1895   -2.4454    0.0000 H   0  0  0  0  0  0  0  0  0  0  0  0
    3.3000   -1.4289    0.0000 H   0  0  0  0  0  0  0  0  0  0  0  0
    2.7518   -0.2611    0.0000 H   0  0  0  0  0  0  0  0  0  0  0  0
    2.1105    0.1091    0.0000 H   0  0  0  0  0  0  0  0  0  0  0  0
    0.5482   -1.1678    0.0000 H   0  0  0  0  0  0  0  0  0  0  0  0
    1.1895   -1.5381    0.0000 H   0  0  0  0  0  0  0  0  0  0  0  0
   -0.4125    0.7145    0.0000 H   0  0  0  0  0  0  0  0  0  0  0  0
   -1.1497   -0.3442    0.0000 H   0  0  0  0  0  0  0  0  0  0  0  0
   -1.1497   -1.0847    0.0000 H   0  0  0  0  0  0  0  0  0  0  0  0
   -0.2449   -2.2168    0.0000 H   0  0  0  0  0  0  0  0  0  0  0  0
    1.9520    0.3020    0.0000 H   0  0  0  0  0  0  0  0  0  0  0  0
    1.6500    1.4289    0.0000 H   0  0  0  0  0  0  0  0  0  0  0  0
    0.5230    1.1270    0.0000 H   0  0  0  0  0  0  0  0  0  0  0  0
    0.4579   -1.8734    0.0000 H   0  0  0  0  0  0  0  0  0  0  0  0
    0.6777   -2.7494    0.0000 H   0  0  0  0  0  0  0  0  0  0  0  0
    1.5682   -2.8992    0.0000 H   0  0  0  0  0  0  0  0  0  0  0  0
  1  2  1  0  0  0  0
  2  3  2  0  0  0  0
  3  4  1  0  0  0  0
  4  5  1  0  0  0  0
  5  6  1  0  0  0  0
  6  7  2  0  0  0  0
  7  8  1  0  0  0  0
  8  9  1  0  0  0  0
  6 10  1  0  0  0  0
  2 11  1  0  0  0  0
  1 12  1  0  0  0  0
  1 13  1  0  0  0  0
  1 14  1  0  0  0  0
  3 15  1  0  0  0  0
  4 16  1  0  0  0  0
  4 17  1  0  0  0  0
  5 18  1  0  0  0  0
  5 19  1  0  0  0  0
  7 20  1  0  0  0  0
  8 21  1  0  0  0  0
  8 22  1  0  0  0  0
  9 23  1  0  0  0  0
 10 24  1  0  0  0  0
 10 25  1  0  0  0  0
 10 26  1  0  0  0  0
 11 27  1  0  0  0  0
 11 28  1  0  0  0  0
 11 29  1  0  0  0  0
M  END
$$$$
14
  Mrv2314 01052423262D          

 35 36  0  0  0  0            999 V2000
   -0.7145   -0.4125    0.0000 C   0  0  0  0  0  0  0  0  0  0  0  0
   -0.7145   -1.2375    0.0000 C   0  0  0  0  0  0  0  0  0  0  0  0
    0.0000   -1.6500    0.0000 C   0  0  0  0  0  0  0  0  0  0  0  0
    0.0000   -2.4750    0.0000 C   0  0  0  0  0  0  0  0  0  0  0  0
   -0.7145   -2.8875    0.0000 C   0  0  0  0  0  0  0  0  0  0  0  0
   -1.4289   -2.4750    0.0000 C   0  0  0  0  0  0  0  0  0  0  0  0
   -1.4289   -1.6500    0.0000 C   0  0  0  0  0  0  0  0  0  0  0  0
    0.7145   -2.8875    0.0000 N   0  0  0  0  0  0  0  0  0  0  0  0
    1.4289   -2.4750    0.0000 C   0  0  0  0  0  0  0  0  0  0  0  0
    1.4289   -1.6500    0.0000 C   0  0  0  0  0  0  0  0  0  0  0  0
    2.1434   -1.2375    0.0000 C   0  0  0  0  0  0  0  0  0  0  0  0
    2.8579   -1.6500    0.0000 N   0  0  0  0  0  0  0  0  0  0  0  0
    2.8579   -2.4750    0.0000 C   0  0  0  0  0  0  0  0  0  0  0  0
    2.1434   -2.8875    0.0000 N   0  0  0  0  0  0  0  0  0  0  0  0
    3.5724   -2.8875    0.0000 S   0  0  0  0  0  0  0  0  0  0  0  0
    4.2868   -2.4750    0.0000 C   0  0  0  0  0  0  0  0  0  0  0  0
    5.0013   -2.8875    0.0000 C   0  0  0  0  0  0  0  0  0  0  0  0
    5.7158   -2.4750    0.0000 O   0  0  0  0  0  0  0  0  0  0  0  0
    5.0013   -3.7125    0.0000 O   0  0  0  0  0  0  0  0  0  0  0  0
    2.1434   -0.4125    0.0000 Cl  0  0  0  0  0  0  0  0  0  0  0  0
    0.7145   -1.2375    0.0000 C   0  0  0  0  0  0  0  0  0  0  0  0
    0.1105   -0.4125    0.0000 H   0  0  0  0  0  0  0  0  0  0  0  0
   -0.7145    0.4125    0.0000 H   0  0  0  0  0  0  0  0  0  0  0  0
   -1.5395   -0.4125    0.0000 H   0  0  0  0  0  0  0  0  0  0  0  0
   -0.7145   -3.7125    0.0000 H   0  0  0  0  0  0  0  0  0  0  0  0
   -2.1434   -2.8875    0.0000 H   0  0  0  0  0  0  0  0  0  0  0  0
   -2.1434   -1.2375    0.0000 H   0  0  0  0  0  0  0  0  0  0  0  0
    0.7145   -3.7125    0.0000 H   0  0  0  0  0  0  0  0  0  0  0  0
    0.7145   -2.0625    0.0000 H   0  0  0  0  0  0  0  0  0  0  0  0
    4.6571   -1.7378    0.0000 H   0  0  0  0  0  0  0  0  0  0  0  0
    3.9166   -1.7378    0.0000 H   0  0  0  0  0  0  0  0  0  0  0  0
    4.2868   -4.1250    0.0000 H   0  0  0  0  0  0  0  0  0  0  0  0
    1.4289   -0.8250    0.0000 H   0  0  0  0  0  0  0  0  0  0  0  0
    0.7145   -0.4125    0.0000 H   0  0  0  0  0  0  0  0  0  0  0  0
    0.0000   -0.8250    0.0000 H   0  0  0  0  0  0  0  0  0  0  0  0
  1  2  1  0  0  0  0
  2  3  4  0  0  0  0
  3  4  4  0  0  0  0
  4  5  4  0  0  0  0
  5  6  4  0  0  0  0
  6  7  4  0  0  0  0
  2  7  4  0  0  0  0
  4  8  1  0  0  0  0
  8  9  1  0  0  0  0
  9 10  4  0  0  0  0
 10 11  4  0  0  0  0
 11 12  4  0  0  0  0
 12 13  4  0  0  0  0
 13 14  4  0  0  0  0
  9 14  4  0  0  0  0
 13 15  1  0  0  0  0
 15 16  1  0  0  0  0
 16 17  1  0  0  0  0
 17 18  2  0  0  0  0
 17 19  1  0  0  0  0
 11 20  1  0  0  0  0
  3 21  1  0  0  0  0
  1 22  1  0  0  0  0
  1 23  1  0  0  0  0
  1 24  1  0  0  0  0
  5 25  1  0  0  0  0
  6 26  1  0  0  0  0
  7 27  1  0  0  0  0
  8 28  1  0  0  0  0
 10 29  1  0  0  0  0
 16 30  1  0  0  0  0
 16 31  1  0  0  0  0
 19 32  1  0  0  0  0
 21 33  1  0  0  0  0
 21 34  1  0  0  0  0
 21 35  1  0  0  0  0
M  END
$$$$
15
  Mrv2314 01052423262D          

 46 48  0  0  0  0            999 V2000
   -0.7145   -3.7125    0.0000 C   0  0  0  0  0  0  0  0  0  0  0  0
    0.0000   -3.3000    0.0000 C   0  0  0  0  0  0  0  0  0  0  0  0
    0.7145   -3.7125    0.0000 C   0  0  0  0  0  0  0  0  0  0  0  0
    0.7145   -4.5375    0.0000 C   0  0  0  0  0  0  0  0  0  0  0  0
    1.4289   -3.3000    0.0000 N   0  0  0  0  0  0  0  0  0  0  0  0
    1.4289   -2.4750    0.0000 C   0  0  0  0  0  0  0  0  0  0  0  0
    2.1434   -3.7125    0.0000 C   0  0  0  0  0  0  0  0  0  0  0  0
    2.1434   -4.5375    0.0000 O   0  0  0  0  0  0  0  0  0  0  0  0
    2.8579   -3.3000    0.0000 C   0  0  0  0  0  0  0  0  0  0  0  0
    2.8579   -2.4750    0.0000 C   0  0  0  0  0  0  0  0  0  0  0  0
    3.5724   -2.0625    0.0000 C   0  0  0  0  0  0  0  0  0  0  0  0
    3.5724   -1.2375    0.0000 C   0  0  0  0  0  0  0  0  0  0  0  0
    4.2868   -0.8250    0.0000 C   0  0  0  0  0  0  0  0  0  0  0  0
    5.0013   -1.2375    0.0000 C   0  0  0  0  0  0  0  0  0  0  0  0
    5.0013   -2.0625    0.0000 C   0  0  0  0  0  0  0  0  0  0  0  0
    4.2868   -2.4750    0.0000 C   0  0  0  0  0  0  0  0  0  0  0  0
    4.2868   -3.3000    0.0000 C   0  0  0  0  0  0  0  0  0  0  0  0
    3.5724   -3.7125    0.0000 N   0  0  0  0  0  0  0  0  0  0  0  0
    5.0013   -3.7125    0.0000 C   0  0  0  0  0  0  0  0  0  0  0  0
    5.7158   -3.3000    0.0000 C   0  0  0  0  0  0  0  0  0  0  0  0
    6.4302   -3.7125    0.0000 C   0  0  0  0  0  0  0  0  0  0  0  0
    6.4302   -4.5375    0.0000 C   0  0  0  0  0  0  0  0  0  0  0  0
    5.7158   -4.9500    0.0000 C   0  0  0  0  0  0  0  0  0  0  0  0
    5.0013   -4.5375    0.0000 C   0  0  0  0  0  0  0  0  0  0  0  0
    4.2868   -4.9500    0.0000 Cl  0  0  0  0  0  0  0  0  0  0  0  0
   -1.1270   -2.9980    0.0000 H   0  0  0  0  0  0  0  0  0  0  0  0
   -1.4289   -4.1250    0.0000 H   0  0  0  0  0  0  0  0  0  0  0  0
   -0.3020   -4.4270    0.0000 H   0  0  0  0  0  0  0  0  0  0  0  0
    0.3703   -2.5628    0.0000 H   0  0  0  0  0  0  0  0  0  0  0  0
   -0.3703   -2.5628    0.0000 H   0  0  0  0  0  0  0  0  0  0  0  0
    0.0000   -4.1250    0.0000 H   0  0  0  0  0  0  0  0  0  0  0  0
    0.1311   -5.1209    0.0000 H   0  0  0  0  0  0  0  0  0  0  0  0
    1.1270   -5.2520    0.0000 H   0  0  0  0  0  0  0  0  0  0  0  0
    1.5114   -4.3240    0.0000 H   0  0  0  0  0  0  0  0  0  0  0  0
    2.2539   -2.4750    0.0000 H   0  0  0  0  0  0  0  0  0  0  0  0
    1.4289   -1.6500    0.0000 H   0  0  0  0  0  0  0  0  0  0  0  0
    0.6039   -2.4750    0.0000 H   0  0  0  0  0  0  0  0  0  0  0  0
    2.6444   -1.6781    0.0000 H   0  0  0  0  0  0  0  0  0  0  0  0
    2.8579   -0.8250    0.0000 H   0  0  0  0  0  0  0  0  0  0  0  0
    4.2868   -0.0000    0.0000 H   0  0  0  0  0  0  0  0  0  0  0  0
    5.7158   -0.8250    0.0000 H   0  0  0  0  0  0  0  0  0  0  0  0
    5.7158   -2.4750    0.0000 H   0  0  0  0  0  0  0  0  0  0  0  0
    5.0013   -2.8875    0.0000 H   0  0  0  0  0  0  0  0  0  0  0  0
    7.1447   -3.3000    0.0000 H   0  0  0  0  0  0  0  0  0  0  0  0
    7.1447   -4.9500    0.0000 H   0  0  0  0  0  0  0  0  0  0  0  0
    5.7158   -5.7750    0.0000 H   0  0  0  0  0  0  0  0  0  0  0  0
  1  2  1  0  0  0  0
  2  3  1  0  0  0  0
  3  4  1  0  0  0  0
  3  5  1  0  0  0  0
  5  6  1  0  0  0  0
  5  7  1  0  0  0  0
  7  8  2  0  0  0  0
  7  9  1  0  0  0  0
  9 10  4  0  0  0  0
 10 11  4  0  0  0  0
 11 12  4  0  0  0  0
 12 13  4  0  0  0  0
 13 14  4  0  0  0  0
 14 15  4  0  0  0  0
 15 16  4  0  0  0  0
 11 16  4  0  0  0  0
 16 17  4  0  0  0  0
 17 18  4  0  0  0  0
  9 18  4  0  0  0  0
 17 19  1  0  0  0  0
 19 20  4  0  0  0  0
 20 21  4  0  0  0  0
 21 22  4  0  0  0  0
 22 23  4  0  0  0  0
 23 24  4  0  0  0  0
 19 24  4  0  0  0  0
 24 25  1  0  0  0  0
  1 26  1  0  0  0  0
  1 27  1  0  0  0  0
  1 28  1  0  0  0  0
  2 29  1  0  0  0  0
  2 30  1  0  0  0  0
  3 31  1  0  0  0  0
  4 32  1  0  0  0  0
  4 33  1  0  0  0  0
  4 34  1  0  0  0  0
  6 35  1  0  0  0  0
  6 36  1  0  0  0  0
  6 37  1  0  0  0  0
 10 38  1  0  0  0  0
 12 39  1  0  0  0  0
 13 40  1  0  0  0  0
 14 41  1  0  0  0  0
 15 42  1  0  0  0  0
 20 43  1  0  0  0  0
 21 44  1  0  0  0  0
 22 45  1  0  0  0  0
 23 46  1  0  0  0  0
M  END
$$$$
16
  Mrv2314 01052423262D          

 20 20  0  0  0  0            999 V2000
    0.5678    1.1143    0.0000 C   0  0  0  0  0  0  0  0  0  0  0  0
    1.2352    0.6294    0.0000 C   0  0  0  0  0  0  0  0  0  0  0  0
    0.9803   -0.1553    0.0000 C   0  0  0  0  0  0  0  0  0  0  0  0
    1.4652   -0.8227    0.0000 O   0  0  0  0  0  0  0  0  0  0  0  0
    0.1553   -0.1553    0.0000 N   0  0  0  0  0  0  0  0  0  0  0  0
   -0.0997    0.6294    0.0000 C   0  0  0  0  0  0  0  0  0  0  0  0
   -0.3297   -0.8227    0.0000 C   0  0  0  0  0  0  0  0  0  0  0  0
   -1.1501   -0.7365    0.0000 C   0  0  0  0  0  0  0  0  0  0  0  0
   -1.6351   -1.4039    0.0000 O   0  0  0  0  0  0  0  0  0  0  0  0
    0.9551    1.8427    0.0000 H   0  0  0  0  0  0  0  0  0  0  0  0
    0.1804    1.8427    0.0000 H   0  0  0  0  0  0  0  0  0  0  0  0
    2.0477    0.4861    0.0000 H   0  0  0  0  0  0  0  0  0  0  0  0
    1.8083    1.2228    0.0000 H   0  0  0  0  0  0  0  0  0  0  0  0
   -0.6728    1.2228    0.0000 H   0  0  0  0  0  0  0  0  0  0  0  0
   -0.9121    0.4861    0.0000 H   0  0  0  0  0  0  0  0  0  0  0  0
   -0.3680   -1.6468    0.0000 H   0  0  0  0  0  0  0  0  0  0  0  0
    0.3084   -1.3456    0.0000 H   0  0  0  0  0  0  0  0  0  0  0  0
   -1.1118    0.0876    0.0000 H   0  0  0  0  0  0  0  0  0  0  0  0
   -1.7883   -0.2136    0.0000 H   0  0  0  0  0  0  0  0  0  0  0  0
   -2.4555   -1.3177    0.0000 H   0  0  0  0  0  0  0  0  0  0  0  0
  1  2  1  0  0  0  0
  2  3  1  0  0  0  0
  3  4  2  0  0  0  0
  3  5  1  0  0  0  0
  5  6  1  0  0  0  0
  1  6  1  0  0  0  0
  5  7  1  0  0  0  0
  7  8  1  0  0  0  0
  8  9  1  0  0  0  0
  1 10  1  0  0  0  0
  1 11  1  0  0  0  0
  2 12  1  0  0  0  0
  2 13  1  0  0  0  0
  6 14  1  0  0  0  0
  6 15  1  0  0  0  0
  7 16  1  0  0  0  0
  7 17  1  0  0  0  0
  8 18  1  0  0  0  0
  8 19  1  0  0  0  0
  9 20  1  0  0  0  0
M  END
$$$$
17
  Mrv2314 01052423262D          

 21 21  0  0  0  0            999 V2000
    0.0157    1.7274    0.0000 C   0  0  0  0  0  0  0  0  0  0  0  0
    0.5678    1.1143    0.0000 C   0  0  0  0  0  0  0  0  0  0  0  0
    1.2352    0.6294    0.0000 C   0  0  0  0  0  0  0  0  0  0  0  0
    2.0198    0.8843    0.0000 O   0  0  0  0  0  0  0  0  0  0  0  0
    0.9803   -0.1553    0.0000 N   0  0  0  0  0  0  0  0  0  0  0  0
    0.1553   -0.1553    0.0000 C   0  0  0  0  0  0  0  0  0  0  0  0
   -0.3297   -0.8227    0.0000 O   0  0  0  0  0  0  0  0  0  0  0  0
   -0.0997    0.6294    0.0000 N   0  0  0  0  0  0  0  0  0  0  0  0
   -0.8843    0.8843    0.0000 C   0  0  0  0  0  0  0  0  0  0  0  0
   -1.4974    0.3323    0.0000 O   0  0  0  0  0  0  0  0  0  0  0  0
    1.1198    1.7274    0.0000 C   0  0  0  0  0  0  0  0  0  0  0  0
    0.6288    2.2794    0.0000 H   0  0  0  0  0  0  0  0  0  0  0  0
   -0.5363    2.3405    0.0000 H   0  0  0  0  0  0  0  0  0  0  0  0
   -0.5974    1.1753    0.0000 H   0  0  0  0  0  0  0  0  0  0  0  0
    1.4652   -0.8227    0.0000 H   0  0  0  0  0  0  0  0  0  0  0  0
   -1.0877    1.6838    0.0000 H   0  0  0  0  0  0  0  0  0  0  0  0
   -1.6738    1.1236    0.0000 H   0  0  0  0  0  0  0  0  0  0  0  0
   -1.7484   -0.4536    0.0000 H   0  0  0  0  0  0  0  0  0  0  0  0
    1.4542    0.9732    0.0000 H   0  0  0  0  0  0  0  0  0  0  0  0
    1.9448    1.7249    0.0000 H   0  0  0  0  0  0  0  0  0  0  0  0
    1.4588    2.4795    0.0000 H   0  0  0  0  0  0  0  0  0  0  0  0
  1  2  1  0  0  0  0
  2  3  1  0  0  0  0
  3  4  2  0  0  0  0
  3  5  1  0  0  0  0
  5  6  1  0  0  0  0
  6  7  2  0  0  0  0
  6  8  1  0  0  0  0
  2  8  1  0  0  0  0
  8  9  1  0  0  0  0
  9 10  1  0  0  0  0
  2 11  1  0  0  0  0
  1 12  1  0  0  0  0
  1 13  1  0  0  0  0
  1 14  1  0  0  0  0
  5 15  1  0  0  0  0
  9 16  1  0  0  0  0
  9 17  1  0  0  0  0
 10 18  1  0  0  0  0
 11 19  1  0  0  0  0
 11 20  1  0  0  0  0
 11 21  1  0  0  0  0
M  END
$$$$
18
  Mrv2314 01052423262D          

 41 43  0  0  0  0            999 V2000
   -1.4534   -0.6979    0.0000 C   0  0  0  0  0  0  0  0  0  0  0  0
   -0.6284   -0.6979    0.0000 C   0  0  0  0  0  0  0  0  0  0  0  0
   -0.1435   -1.3654    0.0000 C   0  0  0  0  0  0  0  0  0  0  0  0
    0.6411   -1.1104    0.0000 C   0  0  0  0  0  0  0  0  0  0  0  0
    0.6411   -0.2854    0.0000 C   0  0  0  0  0  0  0  0  0  0  0  0
   -0.1435   -0.0305    0.0000 N   0  0  0  0  0  0  0  0  0  0  0  0
   -0.3984    0.7541    0.0000 C   0  0  0  0  0  0  0  0  0  0  0  0
    0.1536    1.3672    0.0000 O   0  0  0  0  0  0  0  0  0  0  0  0
   -1.2054    0.9256    0.0000 C   0  0  0  0  0  0  0  0  0  0  0  0
   -1.7575    0.3126    0.0000 C   0  0  0  0  0  0  0  0  0  0  0  0
   -2.5644    0.4841    0.0000 C   0  0  0  0  0  0  0  0  0  0  0  0
   -2.8194    1.2687    0.0000 C   0  0  0  0  0  0  0  0  0  0  0  0
   -2.2673    1.8818    0.0000 C   0  0  0  0  0  0  0  0  0  0  0  0
   -1.4604    1.7103    0.0000 C   0  0  0  0  0  0  0  0  0  0  0  0
   -3.6263    1.4402    0.0000 Cl  0  0  0  0  0  0  0  0  0  0  0  0
    1.3556    0.1271    0.0000 C   0  0  0  0  0  0  0  0  0  0  0  0
    2.0701   -0.2854    0.0000 C   0  0  0  0  0  0  0  0  0  0  0  0
    2.0701   -1.1104    0.0000 C   0  0  0  0  0  0  0  0  0  0  0  0
    1.3556   -1.5229    0.0000 C   0  0  0  0  0  0  0  0  0  0  0  0
    2.7845   -1.5229    0.0000 O   0  0  0  0  0  0  0  0  0  0  0  0
    3.4990   -1.1104    0.0000 C   0  0  0  0  0  0  0  0  0  0  0  0
   -0.3984   -2.1500    0.0000 C   0  0  0  0  0  0  0  0  0  0  0  0
    0.1536   -2.7631    0.0000 C   0  0  0  0  0  0  0  0  0  0  0  0
    0.9606   -2.5916    0.0000 O   0  0  0  0  0  0  0  0  0  0  0  0
   -0.1014   -3.5477    0.0000 O   0  0  0  0  0  0  0  0  0  0  0  0
   -1.4534    0.1271    0.0000 H   0  0  0  0  0  0  0  0  0  0  0  0
   -2.2784   -0.6979    0.0000 H   0  0  0  0  0  0  0  0  0  0  0  0
   -1.4534   -1.5229    0.0000 H   0  0  0  0  0  0  0  0  0  0  0  0
   -2.0624   -0.4540    0.0000 H   0  0  0  0  0  0  0  0  0  0  0  0
   -3.1165   -0.1290    0.0000 H   0  0  0  0  0  0  0  0  0  0  0  0
   -2.5223    2.6664    0.0000 H   0  0  0  0  0  0  0  0  0  0  0  0
   -0.9083    2.3234    0.0000 H   0  0  0  0  0  0  0  0  0  0  0  0
    1.3556    0.9521    0.0000 H   0  0  0  0  0  0  0  0  0  0  0  0
    2.7845    0.1271    0.0000 H   0  0  0  0  0  0  0  0  0  0  0  0
    1.3556   -2.3479    0.0000 H   0  0  0  0  0  0  0  0  0  0  0  0
    3.9115   -1.8249    0.0000 H   0  0  0  0  0  0  0  0  0  0  0  0
    4.2135   -0.6979    0.0000 H   0  0  0  0  0  0  0  0  0  0  0  0
    3.0865   -0.3960    0.0000 H   0  0  0  0  0  0  0  0  0  0  0  0
   -1.1966   -1.9411    0.0000 H   0  0  0  0  0  0  0  0  0  0  0  0
   -1.0426   -2.6655    0.0000 H   0  0  0  0  0  0  0  0  0  0  0  0
   -0.9083   -3.7192    0.0000 H   0  0  0  0  0  0  0  0  0  0  0  0
  1  2  1  0  0  0  0
  2  3  4  0  0  0  0
  3  4  4  0  0  0  0
  4  5  4  0  0  0  0
  5  6  4  0  0  0  0
  2  6  4  0  0  0  0
  6  7  1  0  0  0  0
  7  8  2  0  0  0  0
  7  9  1  0  0  0  0
  9 10  4  0  0  0  0
 10 11  4  0  0  0  0
 11 12  4  0  0  0  0
 12 13  4  0  0  0  0
 13 14  4  0  0  0  0
  9 14  4  0  0  0  0
 12 15  1  0  0  0  0
  5 16  4  0  0  0  0
 16 17  4  0  0  0  0
 17 18  4  0  0  0  0
 18 19  4  0  0  0  0
  4 19  4  0  0  0  0
 18 20  1  0  0  0  0
 20 21  1  0  0  0  0
  3 22  1  0  0  0  0
 22 23  1  0  0  0  0
 23 24  2  0  0  0  0
 23 25  1  0  0  0  0
  1 26  1  0  0  0  0
  1 27  1  0  0  0  0
  1 28  1  0  0  0  0
 10 29  1  0  0  0  0
 11 30  1  0  0  0  0
 13 31  1  0  0  0  0
 14 32  1  0  0  0  0
 16 33  1  0  0  0  0
 17 34  1  0  0  0  0
 19 35  1  0  0  0  0
 21 36  1  0  0  0  0
 21 37  1  0  0  0  0
 21 38  1  0  0  0  0
 22 39  1  0  0  0  0
 22 40  1  0  0  0  0
 25 41  1  0  0  0  0
M  END
$$$$
19
  Mrv2314 01052423262D          

 14 14  0  0  0  0            999 V2000
    0.7145    1.2375    0.0000 C   0  0  0  0  0  0  0  0  0  0  0  0
    1.4289    0.8250    0.0000 C   0  0  0  0  0  0  0  0  0  0  0  0
    1.4289   -0.0000    0.0000 C   0  0  0  0  0  0  0  0  0  0  0  0
    0.7145   -0.4125    0.0000 C   0  0  0  0  0  0  0  0  0  0  0  0
    0.0000    0.0000    0.0000 C   0  0  0  0  0  0  0  0  0  0  0  0
    0.0000    0.8250    0.0000 C   0  0  0  0  0  0  0  0  0  0  0  0
   -0.7145   -0.4125    0.0000 O   0  0  0  0  0  0  0  0  0  0  0  0
    0.7145   -1.2375    0.0000 O   0  0  0  0  0  0  0  0  0  0  0  0
    0.7145    2.0625    0.0000 H   0  0  0  0  0  0  0  0  0  0  0  0
    2.1434    1.2375    0.0000 H   0  0  0  0  0  0  0  0  0  0  0  0
    2.1434   -0.4125    0.0000 H   0  0  0  0  0  0  0  0  0  0  0  0
   -0.7145    1.2375    0.0000 H   0  0  0  0  0  0  0  0  0  0  0  0
   -1.4289    0.0000    0.0000 H   0  0  0  0  0  0  0  0  0  0  0  0
   -0.0000   -1.6500    0.0000 H   0  0  0  0  0  0  0  0  0  0  0  0
  1  2  4  0  0  0  0
  2  3  4  0  0  0  0
  3  4  4  0  0  0  0
  4  5  4  0  0  0  0
  5  6  4  0  0  0  0
  1  6  4  0  0  0  0
  5  7  1  0  0  0  0
  4  8  1  0  0  0  0
  1  9  1  0  0  0  0
  2 10  1  0  0  0  0
  3 11  1  0  0  0  0
  6 12  1  0  0  0  0
  7 13  1  0  0  0  0
  8 14  1  0  0  0  0
M  END
$$$$
20
  Mrv2314 01052423262D          

  8  7  0  0  0  0            999 V2000
    0.8250    0.0000    0.0000 C   0  0  0  0  0  0  0  0  0  0  0  0
    1.2375   -0.7145    0.0000 C   0  0  0  0  0  0  0  0  0  0  0  0
    1.6500   -1.4289    0.0000 F   0  0  0  0  0  0  0  0  0  0  0  0
    1.9520   -0.3020    0.0000 F   0  0  0  0  0  0  0  0  0  0  0  0
    0.5230   -1.1270    0.0000 F   0  0  0  0  0  0  0  0  0  0  0  0
    0.0000    0.0000    0.0000 F   0  0  0  0  0  0  0  0  0  0  0  0
    1.5143    0.4533    0.0000 H   0  0  0  0  0  0  0  0  0  0  0  0
    0.8730    0.8236    0.0000 H   0  0  0  0  0  0  0  0  0  0  0  0
  1  2  1  0  0  0  0
  2  3  1  0  0  0  0
  2  4  1  0  0  0  0
  2  5  1  0  0  0  0
  1  6  1  0  0  0  0
  1  7  1  0  0  0  0
  1  8  1  0  0  0  0
M  END
$$$$
21
  Mrv2314 01052423262D          

  8  7  0  0  0  0            999 V2000
    0.8250   -0.8250    0.0000 C   0  0  0  0  0  0  0  0  0  0  0  0
    0.8250    0.0000    0.0000 C   0  0  0  0  0  0  0  0  0  0  0  0
    0.8250    0.8250    0.0000 Cl  0  0  0  0  0  0  0  0  0  0  0  0
    1.6500   -0.0000    0.0000 Cl  0  0  0  0  0  0  0  0  0  0  0  0
    0.0000    0.0000    0.0000 Cl  0  0  0  0  0  0  0  0  0  0  0  0
    0.0000   -0.8250    0.0000 H   0  0  0  0  0  0  0  0  0  0  0  0
    0.8250   -1.6500    0.0000 H   0  0  0  0  0  0  0  0  0  0  0  0
    1.6500   -0.8250    0.0000 H   0  0  0  0  0  0  0  0  0  0  0  0
  1  2  1  0  0  0  0
  2  3  1  0  0  0  0
  2  4  1  0  0  0  0
  2  5  1  0  0  0  0
  1  6  1  0  0  0  0
  1  7  1  0  0  0  0
  1  8  1  0  0  0  0
M  END
$$$$
22
  Mrv2314 01052423262D          

  8  7  0  0  0  0            999 V2000
    0.8250    0.0000    0.0000 C   0  0  0  0  0  0  0  0  0  0  0  0
    0.8250   -0.8250    0.0000 C   0  0  0  0  0  0  0  0  0  0  0  0
    0.8250   -1.6500    0.0000 F   0  0  0  0  0  0  0  0  0  0  0  0
    1.6500   -0.8250    0.0000 Cl  0  0  0  0  0  0  0  0  0  0  0  0
    0.0000   -0.8250    0.0000 Cl  0  0  0  0  0  0  0  0  0  0  0  0
    0.8250    0.8250    0.0000 F   0  0  0  0  0  0  0  0  0  0  0  0
    1.6500   -0.0000    0.0000 F   0  0  0  0  0  0  0  0  0  0  0  0
    0.0000    0.0000    0.0000 Cl  0  0  0  0  0  0  0  0  0  0  0  0
  1  2  1  0  0  0  0
  2  3  1  0  0  0  0
  2  4  1  0  0  0  0
  2  5  1  0  0  0  0
  1  6  1  0  0  0  0
  1  7  1  0  0  0  0
  1  8  1  0  0  0  0
M  END
$$$$
23
  Mrv2314 01052423262D          

  6  5  0  0  0  0            999 V2000
    1.2375    0.7145    0.0000 C   0  0  0  0  0  0  0  0  0  0  0  0
    0.8250    0.0000    0.0000 C   0  0  0  0  0  0  0  0  0  0  0  0
    1.2375   -0.7145    0.0000 Cl  0  0  0  0  0  0  0  0  0  0  0  0
    0.0000    0.0000    0.0000 Cl  0  0  0  0  0  0  0  0  0  0  0  0
    2.0625    0.7145    0.0000 H   0  0  0  0  0  0  0  0  0  0  0  0
    0.8250    1.4289    0.0000 H   0  0  0  0  0  0  0  0  0  0  0  0
  1  2  2  0  0  0  0
  2  3  1  0  0  0  0
  2  4  1  0  0  0  0
  1  5  1  0  0  0  0
  1  6  1  0  0  0  0
M  END
$$$$
24
  Mrv2314 01052423262D          

 18 18  0  0  0  0            999 V2000
    0.7145    1.2375    0.0000 C   0  0  0  0  0  0  0  0  0  0  0  0
    1.4289    0.8250    0.0000 C   0  0  0  0  0  0  0  0  0  0  0  0
    1.4289   -0.0000    0.0000 C   0  0  0  0  0  0  0  0  0  0  0  0
    0.7145   -0.4125    0.0000 C   0  0  0  0  0  0  0  0  0  0  0  0
    0.0000    0.0000    0.0000 C   0  0  0  0  0  0  0  0  0  0  0  0
    0.0000    0.8250    0.0000 C   0  0  0  0  0  0  0  0  0  0  0  0
   -0.7145    1.2375    0.0000 Cl  0  0  0  0  0  0  0  0  0  0  0  0
   -0.7145   -0.4125    0.0000 Cl  0  0  0  0  0  0  0  0  0  0  0  0
    0.7145   -1.2375    0.0000 Cl  0  0  0  0  0  0  0  0  0  0  0  0
    2.1434   -0.4125    0.0000 Cl  0  0  0  0  0  0  0  0  0  0  0  0
    2.1434    1.2375    0.0000 Cl  0  0  0  0  0  0  0  0  0  0  0  0
    0.7145    2.0625    0.0000 Cl  0  0  0  0  0  0  0  0  0  0  0  0
    0.0000    1.6500    0.0000 H   0  0  0  0  0  0  0  0  0  0  0  0
    1.4289    1.6500    0.0000 H   0  0  0  0  0  0  0  0  0  0  0  0
    1.4289   -0.8250    0.0000 H   0  0  0  0  0  0  0  0  0  0  0  0
   -0.0000   -0.8250    0.0000 H   0  0  0  0  0  0  0  0  0  0  0  0
   -0.7145    0.4125    0.0000 H   0  0  0  0  0  0  0  0  0  0  0  0
    0.7145    0.4125    0.0000 H   0  0  0  0  0  0  0  0  0  0  0  0
  1  2  1  0  0  0  0
  2  3  1  0  0  0  0
  3  4  1  0  0  0  0
  4  5  1  0  0  0  0
  5  6  1  0  0  0  0
  1  6  1  0  0  0  0
  6  7  1  0  0  0  0
  5  8  1  0  0  0  0
  4  9  1  0  0  0  0
  3 10  1  0  0  0  0
  2 11  1  0  0  0  0
  1 12  1  0  0  0  0
  1 13  1  0  0  0  0
  2 14  1  0  0  0  0
  3 15  1  0  0  0  0
  4 16  1  0  0  0  0
  5 17  1  0  0  0  0
  6 18  1  0  0  0  0
M  END
$$$$
25
  Mrv2314 01052423262D          

 14 15  0  0  0  0            999 V2000
    2.0701    1.1104    0.0000 C   0  0  0  0  0  0  0  0  0  0  0  0
    1.3556    0.6979    0.0000 C   0  0  0  0  0  0  0  0  0  0  0  0
    0.6411    1.1104    0.0000 C   0  0  0  0  0  0  0  0  0  0  0  0
   -0.1435    0.8555    0.0000 N   0  0  0  0  0  0  0  0  0  0  0  0
   -0.6284    1.5229    0.0000 N   0  0  0  0  0  0  0  0  0  0  0  0
   -0.1435    2.1904    0.0000 N   0  0  0  0  0  0  0  0  0  0  0  0
    0.6411    1.9354    0.0000 C   0  0  0  0  0  0  0  0  0  0  0  0
    1.3556    2.3479    0.0000 C   0  0  0  0  0  0  0  0  0  0  0  0
    2.0701    1.9354    0.0000 C   0  0  0  0  0  0  0  0  0  0  0  0
    2.7845    0.6979    0.0000 H   0  0  0  0  0  0  0  0  0  0  0  0
    1.3556   -0.1271    0.0000 H   0  0  0  0  0  0  0  0  0  0  0  0
   -1.4534    1.5229    0.0000 H   0  0  0  0  0  0  0  0  0  0  0  0
    1.3556    3.1729    0.0000 H   0  0  0  0  0  0  0  0  0  0  0  0
    2.7845    2.3479    0.0000 H   0  0  0  0  0  0  0  0  0  0  0  0
  1  2  4  0  0  0  0
  2  3  4  0  0  0  0
  3  4  4  0  0  0  0
  4  5  4  0  0  0  0
  5  6  4  0  0  0  0
  6  7  4  0  0  0  0
  3  7  4  0  0  0  0
  7  8  4  0  0  0  0
  8  9  4  0  0  0  0
  1  9  4  0  0  0  0
  1 10  1  0  0  0  0
  2 11  1  0  0  0  0
  5 12  1  0  0  0  0
  8 13  1  0  0  0  0
  9 14  1  0  0  0  0
M  END
$$$$
26
  Mrv2314 01052423262D          

 12 12  0  0  0  0            999 V2000
    0.7145    1.2375    0.0000 C   0  0  0  0  0  0  0  0  0  0  0  0
    1.4289    0.8250    0.0000 C   0  0  0  0  0  0  0  0  0  0  0  0
    1.4289   -0.0000    0.0000 C   0  0  0  0  0  0  0  0  0  0  0  0
    0.7145   -0.4125    0.0000 C   0  0  0  0  0  0  0  0  0  0  0  0
    0.0000    0.0000    0.0000 C   0  0  0  0  0  0  0  0  0  0  0  0
    0.0000    0.8250    0.0000 C   0  0  0  0  0  0  0  0  0  0  0  0
   -0.7145   -0.4125    0.0000 Cl  0  0  0  0  0  0  0  0  0  0  0  0
    0.7145   -1.2375    0.0000 Cl  0  0  0  0  0  0  0  0  0  0  0  0
    2.1434   -0.4125    0.0000 Cl  0  0  0  0  0  0  0  0  0  0  0  0
    0.7145    2.0625    0.0000 H   0  0  0  0  0  0  0  0  0  0  0  0
    2.1434    1.2375    0.0000 H   0  0  0  0  0  0  0  0  0  0  0  0
   -0.7145    1.2375    0.0000 H   0  0  0  0  0  0  0  0  0  0  0  0
  1  2  4  0  0  0  0
  2  3  4  0  0  0  0
  3  4  4  0  0  0  0
  4  5  4  0  0  0  0
  5  6  4  0  0  0  0
  1  6  4  0  0  0  0
  5  7  1  0  0  0  0
  4  8  1  0  0  0  0
  3  9  1  0  0  0  0
  1 10  1  0  0  0  0
  2 11  1  0  0  0  0
  6 12  1  0  0  0  0
M  END
$$$$
27
  Mrv2314 01052423262D          

 12 12  0  0  0  0            999 V2000
    0.7145    1.2375    0.0000 C   0  0  0  0  0  0  0  0  0  0  0  0
    1.4289    0.8250    0.0000 C   0  0  0  0  0  0  0  0  0  0  0  0
    1.4289   -0.0000    0.0000 C   0  0  0  0  0  0  0  0  0  0  0  0
    0.7145   -0.4125    0.0000 C   0  0  0  0  0  0  0  0  0  0  0  0
    0.0000    0.0000    0.0000 C   0  0  0  0  0  0  0  0  0  0  0  0
    0.0000    0.8250    0.0000 C   0  0  0  0  0  0  0  0  0  0  0  0
   -0.7145    1.2375    0.0000 Cl  0  0  0  0  0  0  0  0  0  0  0  0
   -0.7145   -0.4125    0.0000 Cl  0  0  0  0  0  0  0  0  0  0  0  0
    2.1434   -0.4125    0.0000 Cl  0  0  0  0  0  0  0  0  0  0  0  0
    2.1434    1.2375    0.0000 Cl  0  0  0  0  0  0  0  0  0  0  0  0
    0.7145    2.0625    0.0000 H   0  0  0  0  0  0  0  0  0  0  0  0
    0.7145   -1.2375    0.0000 H   0  0  0  0  0  0  0  0  0  0  0  0
  1  2  4  0  0  0  0
  2  3  4  0  0  0  0
  3  4  4  0  0  0  0
  4  5  4  0  0  0  0
  5  6  4  0  0  0  0
  1  6  4  0  0  0  0
  6  7  1  0  0  0  0
  5  8  1  0  0  0  0
  3  9  1  0  0  0  0
  2 10  1  0  0  0  0
  1 11  1  0  0  0  0
  4 12  1  0  0  0  0
M  END
$$$$
28
  Mrv2314 01052423262D          

 21 21  0  0  0  0            999 V2000
    0.7145    2.0625    0.0000 C   0  0  0  0  0  0  0  0  0  0  0  0
    0.7145    1.2375    0.0000 C   0  0  0  0  0  0  0  0  0  0  0  0
    1.4289    0.8250    0.0000 C   0  0  0  0  0  0  0  0  0  0  0  0
    1.4289   -0.0000    0.0000 C   0  0  0  0  0  0  0  0  0  0  0  0
    0.7145   -0.4125    0.0000 C   0  0  0  0  0  0  0  0  0  0  0  0
    0.0000    0.0000    0.0000 C   0  0  0  0  0  0  0  0  0  0  0  0
    0.0000    0.8250    0.0000 C   0  0  0  0  0  0  0  0  0  0  0  0
    0.7145   -1.2375    0.0000 C   0  0  0  0  0  0  0  0  0  0  0  0
    2.1434   -0.4125    0.0000 C   0  0  0  0  0  0  0  0  0  0  0  0
    1.5395    2.0625    0.0000 H   0  0  0  0  0  0  0  0  0  0  0  0
    0.7145    2.8875    0.0000 H   0  0  0  0  0  0  0  0  0  0  0  0
   -0.1105    2.0625    0.0000 H   0  0  0  0  0  0  0  0  0  0  0  0
    2.1434    1.2375    0.0000 H   0  0  0  0  0  0  0  0  0  0  0  0
   -0.7145   -0.4125    0.0000 H   0  0  0  0  0  0  0  0  0  0  0  0
   -0.7145    1.2375    0.0000 H   0  0  0  0  0  0  0  0  0  0  0  0
   -0.1105   -1.2375    0.0000 H   0  0  0  0  0  0  0  0  0  0  0  0
    0.7145   -2.0625    0.0000 H   0  0  0  0  0  0  0  0  0  0  0  0
    1.5395   -1.2375    0.0000 H   0  0  0  0  0  0  0  0  0  0  0  0
    1.7309   -1.1270    0.0000 H   0  0  0  0  0  0  0  0  0  0  0  0
    2.8579   -0.8250    0.0000 H   0  0  0  0  0  0  0  0  0  0  0  0
    2.5559    0.3020    0.0000 H   0  0  0  0  0  0  0  0  0  0  0  0
  1  2  1  0  0  0  0
  2  3  4  0  0  0  0
  3  4  4  0  0  0  0
  4  5  4  0  0  0  0
  5  6  4  0  0  0  0
  6  7  4  0  0  0  0
  2  7  4  0  0  0  0
  5  8  1  0  0  0  0
  4  9  1  0  0  0  0
  1 10  1  0  0  0  0
  1 11  1  0  0  0  0
  1 12  1  0  0  0  0
  3 13  1  0  0  0  0
  6 14  1  0  0  0  0
  7 15  1  0  0  0  0
  8 16  1  0  0  0  0
  8 17  1  0  0  0  0
  8 18  1  0  0  0  0
  9 19  1  0  0  0  0
  9 20  1  0  0  0  0
  9 21  1  0  0  0  0
M  END
$$$$
29
  Mrv2314 01052423262D          

 15 16  0  0  0  0            999 V2000
    3.3523    1.9354    0.0000 C   0  0  0  0  0  0  0  0  0  0  0  0
    3.3523    1.1104    0.0000 C   0  0  0  0  0  0  0  0  0  0  0  0
    2.6378    0.6979    0.0000 C   0  0  0  0  0  0  0  0  0  0  0  0
    1.9233    1.1104    0.0000 C   0  0  0  0  0  0  0  0  0  0  0  0
    1.9233    1.9354    0.0000 C   0  0  0  0  0  0  0  0  0  0  0  0
    2.6378    2.3479    0.0000 C   0  0  0  0  0  0  0  0  0  0  0  0
    1.1387    2.1904    0.0000 C   0  0  0  0  0  0  0  0  0  0  0  0
    0.8838    2.9750    0.0000 O   0  0  0  0  0  0  0  0  0  0  0  0
    0.6538    1.5229    0.0000 N   0  0  0  0  0  0  0  0  0  0  0  0
    1.1387    0.8555    0.0000 S   0  0  0  0  0  0  0  0  0  0  0  0
    4.0668    2.3479    0.0000 H   0  0  0  0  0  0  0  0  0  0  0  0
    4.0668    0.6979    0.0000 H   0  0  0  0  0  0  0  0  0  0  0  0
    2.6378   -0.1271    0.0000 H   0  0  0  0  0  0  0  0  0  0  0  0
    2.6378    3.1729    0.0000 H   0  0  0  0  0  0  0  0  0  0  0  0
   -0.1712    1.5229    0.0000 H   0  0  0  0  0  0  0  0  0  0  0  0
  1  2  4  0  0  0  0
  2  3  4  0  0  0  0
  3  4  4  0  0  0  0
  4  5  4  0  0  0  0
  5  6  4  0  0  0  0
  1  6  4  0  0  0  0
  5  7  1  0  0  0  0
  7  8  2  0  0  0  0
  7  9  1  0  0  0  0
  9 10  1  0  0  0  0
  4 10  1  0  0  0  0
  1 11  1  0  0  0  0
  2 12  1  0  0  0  0
  3 13  1  0  0  0  0
  6 14  1  0  0  0  0
  9 15  1  0  0  0  0
M  END
$$$$
30
  Mrv2314 01052423262D          

  8  7  0  0  0  0            999 V2000
    0.8250    0.0000    0.0000 C   0  0  0  0  0  0  0  0  0  0  0  0
    1.2375   -0.7145    0.0000 C   0  0  0  0  0  0  0  0  0  0  0  0
    2.0625   -0.7145    0.0000 Cl  0  0  0  0  0  0  0  0  0  0  0  0
    0.0000    0.0000    0.0000 Cl  0  0  0  0  0  0  0  0  0  0  0  0
    1.5143    0.4533    0.0000 H   0  0  0  0  0  0  0  0  0  0  0  0
    0.8730    0.8236    0.0000 H   0  0  0  0  0  0  0  0  0  0  0  0
    0.5482   -1.1678    0.0000 H   0  0  0  0  0  0  0  0  0  0  0  0
    1.1895   -1.5381    0.0000 H   0  0  0  0  0  0  0  0  0  0  0  0
  1  2  1  0  0  0  0
  2  3  1  0  0  0  0
  1  4  1  0  0  0  0
  1  5  1  0  0  0  0
  1  6  1  0  0  0  0
  2  7  1  0  0  0  0
  2  8  1  0  0  0  0
M  END
$$$$
31
  Mrv2314 01052423262D          

 11 10  0  0  0  0            999 V2000
    1.2375   -0.7145    0.0000 C   0  0  0  0  0  0  0  0  0  0  0  0
    0.8250    0.0000    0.0000 C   0  0  0  0  0  0  0  0  0  0  0  0
    1.2375    0.7145    0.0000 C   0  0  0  0  0  0  0  0  0  0  0  0
    0.8250    1.4289    0.0000 Cl  0  0  0  0  0  0  0  0  0  0  0  0
    0.0000    0.0000    0.0000 Cl  0  0  0  0  0  0  0  0  0  0  0  0
    0.5230   -1.1270    0.0000 H   0  0  0  0  0  0  0  0  0  0  0  0
    1.6500   -1.4289    0.0000 H   0  0  0  0  0  0  0  0  0  0  0  0
    1.9520   -0.3020    0.0000 H   0  0  0  0  0  0  0  0  0  0  0  0
    1.6500   -0.0000    0.0000 H   0  0  0  0  0  0  0  0  0  0  0  0
    2.0500    0.8577    0.0000 H   0  0  0  0  0  0  0  0  0  0  0  0
    1.7678    1.3465    0.0000 H   0  0  0  0  0  0  0  0  0  0  0  0
  1  2  1  0  0  0  0
  2  3  1  0  0  0  0
  3  4  1  0  0  0  0
  2  5  1  0  0  0  0
  1  6  1  0  0  0  0
  1  7  1  0  0  0  0
  1  8  1  0  0  0  0
  2  9  1  0  0  0  0
  3 10  1  0  0  0  0
  3 11  1  0  0  0  0
M  END
$$$$
32
  Mrv2314 01052423262D          

 20 20  0  0  0  0            999 V2000
    0.7145    2.0625    0.0000 C   0  0  0  0  0  0  0  0  0  0  0  0
    0.7145    1.2375    0.0000 C   0  0  0  0  0  0  0  0  0  0  0  0
    1.4289    0.8250    0.0000 C   0  0  0  0  0  0  0  0  0  0  0  0
    1.4289   -0.0000    0.0000 C   0  0  0  0  0  0  0  0  0  0  0  0
    0.7145   -0.4125    0.0000 C   0  0  0  0  0  0  0  0  0  0  0  0
    0.0000    0.0000    0.0000 C   0  0  0  0  0  0  0  0  0  0  0  0
    0.0000    0.8250    0.0000 C   0  0  0  0  0  0  0  0  0  0  0  0
    2.1434   -0.4125    0.0000 N   0  3  0  0  0  0  0  0  0  0  0  0
    2.8579   -0.0000    0.0000 O   0  0  0  0  0  0  0  0  0  0  0  0
    2.1434   -1.2375    0.0000 O   0  5  0  0  0  0  0  0  0  0  0  0
    2.1434    1.2375    0.0000 C   0  0  0  0  0  0  0  0  0  0  0  0
    1.5395    2.0625    0.0000 H   0  0  0  0  0  0  0  0  0  0  0  0
    0.7145    2.8875    0.0000 H   0  0  0  0  0  0  0  0  0  0  0  0
   -0.1105    2.0625    0.0000 H   0  0  0  0  0  0  0  0  0  0  0  0
    0.7145   -1.2375    0.0000 H   0  0  0  0  0  0  0  0  0  0  0  0
   -0.7145   -0.4125    0.0000 H   0  0  0  0  0  0  0  0  0  0  0  0
   -0.7145    1.2375    0.0000 H   0  0  0  0  0  0  0  0  0  0  0  0
    2.5559    0.5230    0.0000 H   0  0  0  0  0  0  0  0  0  0  0  0
    2.8579    1.6500    0.0000 H   0  0  0  0  0  0  0  0  0  0  0  0
    1.7309    1.9520    0.0000 H   0  0  0  0  0  0  0  0  0  0  0  0
  1  2  1  0  0  0  0
  2  3  4  0  0  0  0
  3  4  4  0  0  0  0
  4  5  4  0  0  0  0
  5  6  4  0  0  0  0
  6  7  4  0  0  0  0
  2  7  4  0  0  0  0
  4  8  1  0  0  0  0
  8  9  2  0  0  0  0
  8 10  1  0  0  0  0
  3 11  1  0  0  0  0
  1 12  1  0  0  0  0
  1 13  1  0  0  0  0
  1 14  1  0  0  0  0
  5 15  1  0  0  0  0
  6 16  1  0  0  0  0
  7 17  1  0  0  0  0
 11 18  1  0  0  0  0
 11 19  1  0  0  0  0
 11 20  1  0  0  0  0
M  CHG  2   8   1  10  -1
M  END
$$$$
33
  Mrv2314 01052423262D          

 16 16  0  0  0  0            999 V2000
    0.7145    1.2375    0.0000 C   0  0  0  0  0  0  0  0  0  0  0  0
    1.4289    0.8250    0.0000 C   0  0  0  0  0  0  0  0  0  0  0  0
    1.4289   -0.0000    0.0000 C   0  0  0  0  0  0  0  0  0  0  0  0
    0.7145   -0.4125    0.0000 C   0  0  0  0  0  0  0  0  0  0  0  0
    0.0000    0.0000    0.0000 C   0  0  0  0  0  0  0  0  0  0  0  0
    0.0000    0.8250    0.0000 C   0  0  0  0  0  0  0  0  0  0  0  0
   -0.7145   -0.4125    0.0000 N   0  3  0  0  0  0  0  0  0  0  0  0
   -1.4289    0.0000    0.0000 O   0  0  0  0  0  0  0  0  0  0  0  0
   -0.7145   -1.2375    0.0000 O   0  5  0  0  0  0  0  0  0  0  0  0
    0.7145   -1.2375    0.0000 N   0  3  0  0  0  0  0  0  0  0  0  0
    1.4289   -1.6500    0.0000 O   0  0  0  0  0  0  0  0  0  0  0  0
   -0.0000   -1.6500    0.0000 O   0  5  0  0  0  0  0  0  0  0  0  0
    0.7145    2.0625    0.0000 H   0  0  0  0  0  0  0  0  0  0  0  0
    2.1434    1.2375    0.0000 H   0  0  0  0  0  0  0  0  0  0  0  0
    2.1434   -0.4125    0.0000 H   0  0  0  0  0  0  0  0  0  0  0  0
   -0.7145    1.2375    0.0000 H   0  0  0  0  0  0  0  0  0  0  0  0
  1  2  4  0  0  0  0
  2  3  4  0  0  0  0
  3  4  4  0  0  0  0
  4  5  4  0  0  0  0
  5  6  4  0  0  0  0
  1  6  4  0  0  0  0
  5  7  1  0  0  0  0
  7  8  2  0  0  0  0
  7  9  1  0  0  0  0
  4 10  1  0  0  0  0
 10 11  2  0  0  0  0
 10 12  1  0  0  0  0
  1 13  1  0  0  0  0
  2 14  1  0  0  0  0
  3 15  1  0  0  0  0
  6 16  1  0  0  0  0
M  CHG  4   7   1   9  -1  10   1  12  -1
M  END
$$$$
34
  Mrv2314 01052423262D          

 30 31  0  0  0  0            999 V2000
   -1.4289   -1.6500    0.0000 C   0  0  0  0  0  0  0  0  0  0  0  0
   -0.7145   -1.2375    0.0000 C   0  0  0  0  0  0  0  0  0  0  0  0
    0.0000   -1.6500    0.0000 C   0  0  0  0  0  0  0  0  0  0  0  0
    0.0000   -2.4750    0.0000 C   0  0  0  0  0  0  0  0  0  0  0  0
   -0.7145   -2.8875    0.0000 C   0  0  0  0  0  0  0  0  0  0  0  0
   -1.4289   -2.4750    0.0000 C   0  0  0  0  0  0  0  0  0  0  0  0
    0.7145   -2.8875    0.0000 O   0  0  0  0  0  0  0  0  0  0  0  0
    1.4289   -2.4750    0.0000 C   0  0  0  0  0  0  0  0  0  0  0  0
    2.1434   -2.8875    0.0000 C   0  0  0  0  0  0  0  0  0  0  0  0
    2.8579   -2.4750    0.0000 O   0  0  0  0  0  0  0  0  0  0  0  0
    3.5724   -2.8875    0.0000 C   0  0  0  0  0  0  0  0  0  0  0  0
    4.2868   -2.4750    0.0000 C   0  0  0  0  0  0  0  0  0  0  0  0
    5.0013   -2.8875    0.0000 C   0  0  0  0  0  0  0  0  0  0  0  0
    5.0013   -3.7125    0.0000 C   0  0  0  0  0  0  0  0  0  0  0  0
    4.2868   -4.1250    0.0000 C   0  0  0  0  0  0  0  0  0  0  0  0
    3.5724   -3.7125    0.0000 C   0  0  0  0  0  0  0  0  0  0  0  0
   -2.1434   -1.2375    0.0000 H   0  0  0  0  0  0  0  0  0  0  0  0
   -0.7145   -0.4125    0.0000 H   0  0  0  0  0  0  0  0  0  0  0  0
    0.7145   -1.2375    0.0000 H   0  0  0  0  0  0  0  0  0  0  0  0
   -0.7145   -3.7125    0.0000 H   0  0  0  0  0  0  0  0  0  0  0  0
   -2.1434   -2.8875    0.0000 H   0  0  0  0  0  0  0  0  0  0  0  0
    1.7992   -1.7378    0.0000 H   0  0  0  0  0  0  0  0  0  0  0  0
    1.0587   -1.7378    0.0000 H   0  0  0  0  0  0  0  0  0  0  0  0
    1.7732   -3.6247    0.0000 H   0  0  0  0  0  0  0  0  0  0  0  0
    2.5137   -3.6247    0.0000 H   0  0  0  0  0  0  0  0  0  0  0  0
    4.2868   -1.6500    0.0000 H   0  0  0  0  0  0  0  0  0  0  0  0
    5.7158   -2.4750    0.0000 H   0  0  0  0  0  0  0  0  0  0  0  0
    5.7158   -4.1250    0.0000 H   0  0  0  0  0  0  0  0  0  0  0  0
    4.2868   -4.9500    0.0000 H   0  0  0  0  0  0  0  0  0  0  0  0
    2.8579   -4.1250    0.0000 H   0  0  0  0  0  0  0  0  0  0  0  0
  1  2  4  0  0  0  0
  2  3  4  0  0  0  0
  3  4  4  0  0  0  0
  4  5  4  0  0  0  0
  5  6  4  0  0  0  0
  1  6  4  0  0  0  0
  4  7  1  0  0  0  0
  7  8  1  0  0  0  0
  8  9  1  0  0  0  0
  9 10  1  0  0  0  0
 10 11  1  0  0  0  0
 11 12  4  0  0  0  0
 12 13  4  0  0  0  0
 13 14  4  0  0  0  0
 14 15  4  0  0  0  0
 15 16  4  0  0  0  0
 11 16  4  0  0  0  0
  1 17  1  0  0  0  0
  2 18  1  0  0  0  0
  3 19  1  0  0  0  0
  5 20  1  0  0  0  0
  6 21  1  0  0  0  0
  8 22  1  0  0  0  0
  8 23  1  0  0  0  0
  9 24  1  0  0  0  0
  9 25  1  0  0  0  0
 12 26  1  0  0  0  0
 13 27  1  0  0  0  0
 14 28  1  0  0  0  0
 15 29  1  0  0  0  0
 16 30  1  0  0  0  0
M  END
$$$$
35
  Mrv2314 01052423262D          

 26 27  0  0  0  0            999 V2000
    1.4289   -2.4750    0.0000 C   0  0  0  0  0  0  0  0  0  0  0  0
    2.1434   -2.8875    0.0000 C   0  0  0  0  0  0  0  0  0  0  0  0
    2.1434   -3.7125    0.0000 C   0  0  0  0  0  0  0  0  0  0  0  0
    1.4289   -4.1250    0.0000 C   0  0  0  0  0  0  0  0  0  0  0  0
    0.7145   -3.7125    0.0000 C   0  0  0  0  0  0  0  0  0  0  0  0
    0.7145   -2.8875    0.0000 C   0  0  0  0  0  0  0  0  0  0  0  0
    1.4289   -4.9500    0.0000 N   0  0  0  0  0  0  0  0  0  0  0  0
    2.1434   -5.3625    0.0000 N   0  0  0  0  0  0  0  0  0  0  0  0
    2.1434   -6.1875    0.0000 C   0  0  0  0  0  0  0  0  0  0  0  0
    2.8579   -6.6000    0.0000 C   0  0  0  0  0  0  0  0  0  0  0  0
    2.8579   -7.4250    0.0000 C   0  0  0  0  0  0  0  0  0  0  0  0
    2.1434   -7.8375    0.0000 C   0  0  0  0  0  0  0  0  0  0  0  0
    1.4289   -7.4250    0.0000 C   0  0  0  0  0  0  0  0  0  0  0  0
    1.4289   -6.6000    0.0000 C   0  0  0  0  0  0  0  0  0  0  0  0
    1.4289   -1.6500    0.0000 H   0  0  0  0  0  0  0  0  0  0  0  0
    2.8579   -2.4750    0.0000 H   0  0  0  0  0  0  0  0  0  0  0  0
    2.8579   -4.1250    0.0000 H   0  0  0  0  0  0  0  0  0  0  0  0
    0.0000   -4.1250    0.0000 H   0  0  0  0  0  0  0  0  0  0  0  0
    0.0000   -2.4750    0.0000 H   0  0  0  0  0  0  0  0  0  0  0  0
    0.7145   -5.3625    0.0000 H   0  0  0  0  0  0  0  0  0  0  0  0
    2.8579   -4.9500    0.0000 H   0  0  0  0  0  0  0  0  0  0  0  0
    3.5724   -6.1875    0.0000 H   0  0  0  0  0  0  0  0  0  0  0  0
    3.5724   -7.8375    0.0000 H   0  0  0  0  0  0  0  0  0  0  0  0
    2.1434   -8.6625    0.0000 H   0  0  0  0  0  0  0  0  0  0  0  0
    0.7145   -7.8375    0.0000 H   0  0  0  0  0  0  0  0  0  0  0  0
    0.7145   -6.1875    0.0000 H   0  0  0  0  0  0  0  0  0  0  0  0
  1  2  4  0  0  0  0
  2  3  4  0  0  0  0
  3  4  4  0  0  0  0
  4  5  4  0  0  0  0
  5  6  4  0  0  0  0
  1  6  4  0  0  0  0
  4  7  1  0  0  0  0
  7  8  1  0  0  0  0
  8  9  1  0  0  0  0
  9 10  4  0  0  0  0
 10 11  4  0  0  0  0
 11 12  4  0  0  0  0
 12 13  4  0  0  0  0
 13 14  4  0  0  0  0
  9 14  4  0  0  0  0
  1 15  1  0  0  0  0
  2 16  1  0  0  0  0
  3 17  1  0  0  0  0
  5 18  1  0  0  0  0
  6 19  1  0  0  0  0
  7 20  1  0  0  0  0
  8 21  1  0  0  0  0
 10 22  1  0  0  0  0
 11 23  1  0  0  0  0
 12 24  1  0  0  0  0
 13 25  1  0  0  0  0
 14 26  1  0  0  0  0
M  END
$$$$
36
  Mrv2314 01052423262D          

 10  9  0  0  0  0            999 V2000
    2.0625   -0.7145    0.0000 C   0  0  0  0  0  0  0  0  0  0  0  0
    1.2375   -0.7145    0.0000 C   0  0  0  0  0  0  0  0  0  0  0  0
    0.8250    0.0000    0.0000 C   0  0  0  0  0  0  0  0  0  0  0  0
    0.0000    0.0000    0.0000 C   0  0  0  0  0  0  0  0  0  0  0  0
    2.4750   -1.4289    0.0000 H   0  0  0  0  0  0  0  0  0  0  0  0
    2.4750   -0.0000    0.0000 H   0  0  0  0  0  0  0  0  0  0  0  0
    0.8250   -1.4289    0.0000 H   0  0  0  0  0  0  0  0  0  0  0  0
    1.2375    0.7145    0.0000 H   0  0  0  0  0  0  0  0  0  0  0  0
   -0.4125    0.7145    0.0000 H   0  0  0  0  0  0  0  0  0  0  0  0
   -0.4125   -0.7145    0.0000 H   0  0  0  0  0  0  0  0  0  0  0  0
  1  2  2  0  0  0  0
  2  3  1  0  0  0  0
  3  4  2  0  0  0  0
  1  5  1  0  0  0  0
  1  6  1  0  0  0  0
  2  7  1  0  0  0  0
  3  8  1  0  0  0  0
  4  9  1  0  0  0  0
  4 10  1  0  0  0  0
M  END
$$$$
37
  Mrv2314 01052423262D          

 30 30  0  0  0  0            999 V2000
    0.0000    2.4750    0.0000 C   0  0  0  0  0  0  0  0  0  0  0  0
    0.7145    2.0625    0.0000 C   0  0  0  0  0  0  0  0  0  0  0  0
    1.4289    2.4750    0.0000 C   0  0  0  0  0  0  0  0  0  0  0  0
    0.7145    1.2375    0.0000 C   0  0  0  0  0  0  0  0  0  0  0  0
    1.4289    0.8250    0.0000 C   0  0  0  0  0  0  0  0  0  0  0  0
    1.4289   -0.0000    0.0000 C   0  0  0  0  0  0  0  0  0  0  0  0
    0.7145   -0.4125    0.0000 C   0  0  0  0  0  0  0  0  0  0  0  0
    0.0000    0.0000    0.0000 C   0  0  0  0  0  0  0  0  0  0  0  0
    0.0000    0.8250    0.0000 C   0  0  0  0  0  0  0  0  0  0  0  0
    2.1434   -0.4125    0.0000 C   0  0  0  0  0  0  0  0  0  0  0  0
    2.8579   -0.0000    0.0000 C   0  0  0  0  0  0  0  0  0  0  0  0
    2.1434   -1.2375    0.0000 C   0  0  0  0  0  0  0  0  0  0  0  0
    0.4125    3.1895    0.0000 H   0  0  0  0  0  0  0  0  0  0  0  0
   -0.7145    2.8875    0.0000 H   0  0  0  0  0  0  0  0  0  0  0  0
   -0.4125    1.7605    0.0000 H   0  0  0  0  0  0  0  0  0  0  0  0
    0.7145    2.8875    0.0000 H   0  0  0  0  0  0  0  0  0  0  0  0
    1.6425    1.6781    0.0000 H   0  0  0  0  0  0  0  0  0  0  0  0
    2.2539    2.4750    0.0000 H   0  0  0  0  0  0  0  0  0  0  0  0
    1.6425    3.2719    0.0000 H   0  0  0  0  0  0  0  0  0  0  0  0
    2.2477    0.7241    0.0000 H   0  0  0  0  0  0  0  0  0  0  0  0
    0.7145   -1.2375    0.0000 H   0  0  0  0  0  0  0  0  0  0  0  0
   -0.7145   -0.4125    0.0000 H   0  0  0  0  0  0  0  0  0  0  0  0
   -0.7145    1.2375    0.0000 H   0  0  0  0  0  0  0  0  0  0  0  0
    2.1434    0.4125    0.0000 H   0  0  0  0  0  0  0  0  0  0  0  0
    3.0016   -0.8124    0.0000 H   0  0  0  0  0  0  0  0  0  0  0  0
    3.6705   -0.1424    0.0000 H   0  0  0  0  0  0  0  0  0  0  0  0
    3.2693    0.7151    0.0000 H   0  0  0  0  0  0  0  0  0  0  0  0
    1.3500   -1.0113    0.0000 H   0  0  0  0  0  0  0  0  0  0  0  0
    1.7084   -1.9385    0.0000 H   0  0  0  0  0  0  0  0  0  0  0  0
    2.6983   -1.8480    0.0000 H   0  0  0  0  0  0  0  0  0  0  0  0
  1  2  1  0  0  0  0
  2  3  1  0  0  0  0
  2  4  1  0  0  0  0
  4  5  4  0  0  0  0
  5  6  4  0  0  0  0
  6  7  4  0  0  0  0
  7  8  4  0  0  0  0
  8  9  4  0  0  0  0
  4  9  4  0  0  0  0
  6 10  1  0  0  0  0
 10 11  1  0  0  0  0
 10 12  1  0  0  0  0
  1 13  1  0  0  0  0
  1 14  1  0  0  0  0
  1 15  1  0  0  0  0
  2 16  1  0  0  0  0
  3 17  1  0  0  0  0
  3 18  1  0  0  0  0
  3 19  1  0  0  0  0
  5 20  1  0  0  0  0
  7 21  1  0  0  0  0
  8 22  1  0  0  0  0
  9 23  1  0  0  0  0
 10 24  1  0  0  0  0
 11 25  1  0  0  0  0
 11 26  1  0  0  0  0
 11 27  1  0  0  0  0
 12 28  1  0  0  0  0
 12 29  1  0  0  0  0
 12 30  1  0  0  0  0
M  END
$$$$
38
  Mrv2314 01052423262D          

 16 16  0  0  0  0            999 V2000
    0.7145    1.2375    0.0000 C   0  0  0  0  0  0  0  0  0  0  0  0
    1.4289    0.8250    0.0000 C   0  0  0  0  0  0  0  0  0  0  0  0
    1.4289   -0.0000    0.0000 C   0  0  0  0  0  0  0  0  0  0  0  0
    0.7145   -0.4125    0.0000 C   0  0  0  0  0  0  0  0  0  0  0  0
    0.0000    0.0000    0.0000 C   0  0  0  0  0  0  0  0  0  0  0  0
    0.0000    0.8250    0.0000 C   0  0  0  0  0  0  0  0  0  0  0  0
   -0.7145   -0.4125    0.0000 N   0  3  0  0  0  0  0  0  0  0  0  0
   -1.4289    0.0000    0.0000 O   0  0  0  0  0  0  0  0  0  0  0  0
   -0.7145   -1.2375    0.0000 O   0  5  0  0  0  0  0  0  0  0  0  0
    2.1434   -0.4125    0.0000 N   0  3  0  0  0  0  0  0  0  0  0  0
    2.8579   -0.0000    0.0000 O   0  0  0  0  0  0  0  0  0  0  0  0
    2.1434   -1.2375    0.0000 O   0  5  0  0  0  0  0  0  0  0  0  0
    0.7145    2.0625    0.0000 H   0  0  0  0  0  0  0  0  0  0  0  0
    2.1434    1.2375    0.0000 H   0  0  0  0  0  0  0  0  0  0  0  0
    0.7145   -1.2375    0.0000 H   0  0  0  0  0  0  0  0  0  0  0  0
   -0.7145    1.2375    0.0000 H   0  0  0  0  0  0  0  0  0  0  0  0
  1  2  4  0  0  0  0
  2  3  4  0  0  0  0
  3  4  4  0  0  0  0
  4  5  4  0  0  0  0
  5  6  4  0  0  0  0
  1  6  4  0  0  0  0
  5  7  1  0  0  0  0
  7  8  2  0  0  0  0
  7  9  1  0  0  0  0
  3 10  1  0  0  0  0
 10 11  2  0  0  0  0
 10 12  1  0  0  0  0
  1 13  1  0  0  0  0
  2 14  1  0  0  0  0
  4 15  1  0  0  0  0
  6 16  1  0  0  0  0
M  CHG  4   7   1   9  -1  10   1  12  -1
M  END
$$$$
39
  Mrv2314 01052423262D          

 29 30  0  0  0  0            999 V2000
    2.8579   -2.4750    0.0000 C   0  0  0  0  0  0  0  0  0  0  0  0
    3.5724   -2.8875    0.0000 C   0  0  0  0  0  0  0  0  0  0  0  0
    3.5724   -3.7125    0.0000 C   0  0  0  0  0  0  0  0  0  0  0  0
    2.8579   -4.1250    0.0000 C   0  0  0  0  0  0  0  0  0  0  0  0
    2.1434   -3.7125    0.0000 C   0  0  0  0  0  0  0  0  0  0  0  0
    2.1434   -2.8875    0.0000 C   0  0  0  0  0  0  0  0  0  0  0  0
    2.8579   -4.9500    0.0000 N   0  0  0  0  0  0  0  0  0  0  0  0
    2.1434   -5.3625    0.0000 C   0  0  0  0  0  0  0  0  0  0  0  0
    2.1434   -6.1875    0.0000 N   0  0  0  0  0  0  0  0  0  0  0  0
    1.4289   -6.6000    0.0000 C   0  0  0  0  0  0  0  0  0  0  0  0
    1.4289   -7.4250    0.0000 C   0  0  0  0  0  0  0  0  0  0  0  0
    0.7145   -7.8375    0.0000 C   0  0  0  0  0  0  0  0  0  0  0  0
    0.0000   -7.4250    0.0000 C   0  0  0  0  0  0  0  0  0  0  0  0
    0.0000   -6.6000    0.0000 C   0  0  0  0  0  0  0  0  0  0  0  0
    0.7145   -6.1875    0.0000 C   0  0  0  0  0  0  0  0  0  0  0  0
    1.4289   -4.9500    0.0000 N   0  0  0  0  0  0  0  0  0  0  0  0
    2.8579   -1.6500    0.0000 H   0  0  0  0  0  0  0  0  0  0  0  0
    4.2868   -2.4750    0.0000 H   0  0  0  0  0  0  0  0  0  0  0  0
    4.2868   -4.1250    0.0000 H   0  0  0  0  0  0  0  0  0  0  0  0
    1.4289   -4.1250    0.0000 H   0  0  0  0  0  0  0  0  0  0  0  0
    1.4289   -2.4750    0.0000 H   0  0  0  0  0  0  0  0  0  0  0  0
    3.5724   -5.3625    0.0000 H   0  0  0  0  0  0  0  0  0  0  0  0
    2.1434   -7.8375    0.0000 H   0  0  0  0  0  0  0  0  0  0  0  0
    0.7145   -8.6625    0.0000 H   0  0  0  0  0  0  0  0  0  0  0  0
   -0.7145   -7.8375    0.0000 H   0  0  0  0  0  0  0  0  0  0  0  0
   -0.7145   -6.1875    0.0000 H   0  0  0  0  0  0  0  0  0  0  0  0
    0.7145   -5.3625    0.0000 H   0  0  0  0  0  0  0  0  0  0  0  0
    0.7145   -4.5375    0.0000 H   0  0  0  0  0  0  0  0  0  0  0  0
    2.1434   -4.5375    0.0000 H   0  0  0  0  0  0  0  0  0  0  0  0
  1  2  4  0  0  0  0
  2  3  4  0  0  0  0
  3  4  4  0  0  0  0
  4  5  4  0  0  0  0
  5  6  4  0  0  0  0
  1  6  4  0  0  0  0
  4  7  1  0  0  0  0
  7  8  1  0  0  0  0
  8  9  2  0  0  0  0
  9 10  1  4  0  0  0
 10 11  4  0  0  0  0
 11 12  4  0  0  0  0
 12 13  4  0  0  0  0
 13 14  4  0  0  0  0
 14 15  4  0  0  0  0
 10 15  4  0  0  0  0
  8 16  1  0  0  0  0
  1 17  1  0  0  0  0
  2 18  1  0  0  0  0
  3 19  1  0  0  0  0
  5 20  1  0  0  0  0
  6 21  1  0  0  0  0
  7 22  1  0  0  0  0
 11 23  1  0  0  0  0
 12 24  1  0  0  0  0
 13 25  1  0  0  0  0
 14 26  1  0  0  0  0
 15 27  1  0  0  0  0
 16 28  1  0  0  0  0
 16 29  1  0  0  0  0
M  END
$$$$
40
  Mrv2314 01052423262D          

 46 48  0  0  0  0            999 V2000
    4.2868    3.3000    0.0000 C   0  0  0  0  0  0  0  0  0  0  0  0
    4.2868    2.4750    0.0000 C   0  0  0  0  0  0  0  0  0  0  0  0
    5.0013    2.0625    0.0000 C   0  0  0  0  0  0  0  0  0  0  0  0
    3.5724    2.0625    0.0000 N   0  0  0  0  0  0  0  0  0  0  0  0
    3.5724    1.2375    0.0000 C   0  0  0  0  0  0  0  0  0  0  0  0
    2.8579    0.8250    0.0000 C   0  0  0  0  0  0  0  0  0  0  0  0
    2.8579    0.0000    0.0000 C   0  0  0  0  0  0  0  0  0  0  0  0
    3.5724   -0.4125    0.0000 C   0  0  0  0  0  0  0  0  0  0  0  0
    4.2868   -0.0000    0.0000 C   0  0  0  0  0  0  0  0  0  0  0  0
    4.2868    0.8250    0.0000 C   0  0  0  0  0  0  0  0  0  0  0  0
    3.5724   -1.2375    0.0000 N   0  0  0  0  0  0  0  0  0  0  0  0
    4.2868   -1.6500    0.0000 C   0  0  0  0  0  0  0  0  0  0  0  0
    5.0013   -1.2375    0.0000 C   0  0  0  0  0  0  0  0  0  0  0  0
    4.2868   -2.4750    0.0000 C   0  0  0  0  0  0  0  0  0  0  0  0
    2.1434   -0.4125    0.0000 C   0  0  0  0  0  0  0  0  0  0  0  0
    2.1434   -1.2375    0.0000 O   0  0  0  0  0  0  0  0  0  0  0  0
    1.4289   -0.0000    0.0000 C   0  0  0  0  0  0  0  0  0  0  0  0
    0.7145   -0.4125    0.0000 C   0  0  0  0  0  0  0  0  0  0  0  0
   -0.0000    0.0000    0.0000 C   0  0  0  0  0  0  0  0  0  0  0  0
    0.0000    0.8250    0.0000 C   0  0  0  0  0  0  0  0  0  0  0  0
    0.7145    1.2375    0.0000 C   0  0  0  0  0  0  0  0  0  0  0  0
    1.4289    0.8250    0.0000 C   0  0  0  0  0  0  0  0  0  0  0  0
    2.1434    1.2375    0.0000 C   0  0  0  0  0  0  0  0  0  0  0  0
    2.1434    2.0625    0.0000 O   0  0  0  0  0  0  0  0  0  0  0  0
    5.1118    3.3000    0.0000 H   0  0  0  0  0  0  0  0  0  0  0  0
    4.2868    4.1250    0.0000 H   0  0  0  0  0  0  0  0  0  0  0  0
    3.4618    3.3000    0.0000 H   0  0  0  0  0  0  0  0  0  0  0  0
    5.0013    2.8875    0.0000 H   0  0  0  0  0  0  0  0  0  0  0  0
    4.4179    1.4791    0.0000 H   0  0  0  0  0  0  0  0  0  0  0  0
    5.4138    1.3480    0.0000 H   0  0  0  0  0  0  0  0  0  0  0  0
    5.7982    2.2760    0.0000 H   0  0  0  0  0  0  0  0  0  0  0  0
    2.8579    2.4750    0.0000 H   0  0  0  0  0  0  0  0  0  0  0  0
    5.0013   -0.4125    0.0000 H   0  0  0  0  0  0  0  0  0  0  0  0
    5.1078    0.7435    0.0000 H   0  0  0  0  0  0  0  0  0  0  0  0
    2.8579   -1.6500    0.0000 H   0  0  0  0  0  0  0  0  0  0  0  0
    4.2868   -0.8250    0.0000 H   0  0  0  0  0  0  0  0  0  0  0  0
    5.0013   -2.0625    0.0000 H   0  0  0  0  0  0  0  0  0  0  0  0
    5.7158   -1.6500    0.0000 H   0  0  0  0  0  0  0  0  0  0  0  0
    5.7158   -0.8250    0.0000 H   0  0  0  0  0  0  0  0  0  0  0  0
    3.4899   -2.2615    0.0000 H   0  0  0  0  0  0  0  0  0  0  0  0
    3.8743   -3.1895    0.0000 H   0  0  0  0  0  0  0  0  0  0  0  0
    4.8702   -3.0584    0.0000 H   0  0  0  0  0  0  0  0  0  0  0  0
    0.7145   -1.2375    0.0000 H   0  0  0  0  0  0  0  0  0  0  0  0
   -0.7145   -0.4125    0.0000 H   0  0  0  0  0  0  0  0  0  0  0  0
   -0.7145    1.2375    0.0000 H   0  0  0  0  0  0  0  0  0  0  0  0
    0.7145    2.0625    0.0000 H   0  0  0  0  0  0  0  0  0  0  0  0
  1  2  1  0  0  0  0
  2  3  1  0  0  0  0
  2  4  1  0  0  0  0
  4  5  1  0  0  0  0
  5  6  4  0  0  0  0
  6  7  4  0  0  0  0
  7  8  4  0  0  0  0
  8  9  4  0  0  0  0
  9 10  4  0  0  0  0
  5 10  4  0  0  0  0
  8 11  1  0  0  0  0
 11 12  1  0  0  0  0
 12 13  1  0  0  0  0
 12 14  1  0  0  0  0
  7 15  1  0  0  0  0
 15 16  2  0  0  0  0
 15 17  1  0  0  0  0
 17 18  4  0  0  0  0
 18 19  4  0  0  0  0
 19 20  4  0  0  0  0
 20 21  4  0  0  0  0
 21 22  4  0  0  0  0
 17 22  4  0  0  0  0
 22 23  1  0  0  0  0
  6 23  1  0  0  0  0
 23 24  2  0  0  0  0
  1 25  1  0  0  0  0
  1 26  1  0  0  0  0
  1 27  1  0  0  0  0
  2 28  1  0  0  0  0
  3 29  1  0  0  0  0
  3 30  1  0  0  0  0
  3 31  1  0  0  0  0
  4 32  1  0  0  0  0
  9 33  1  0  0  0  0
 10 34  1  0  0  0  0
 11 35  1  0  0  0  0
 12 36  1  0  0  0  0
 13 37  1  0  0  0  0
 13 38  1  0  0  0  0
 13 39  1  0  0  0  0
 14 40  1  0  0  0  0
 14 41  1  0  0  0  0
 14 42  1  0  0  0  0
 18 43  1  0  0  0  0
 19 44  1  0  0  0  0
 20 45  1  0  0  0  0
 21 46  1  0  0  0  0
M  END
$$$$
41
  Mrv2314 01052423262D          

 12 12  0  0  0  0            999 V2000
    0.7145    1.2375    0.0000 C   0  0  0  0  0  0  0  0  0  0  0  0
    1.4289    0.8250    0.0000 C   0  0  0  0  0  0  0  0  0  0  0  0
    1.4289   -0.0000    0.0000 C   0  0  0  0  0  0  0  0  0  0  0  0
    0.7145   -0.4125    0.0000 C   0  0  0  0  0  0  0  0  0  0  0  0
    0.0000    0.0000    0.0000 C   0  0  0  0  0  0  0  0  0  0  0  0
    0.0000    0.8250    0.0000 C   0  0  0  0  0  0  0  0  0  0  0  0
   -0.7145    1.2375    0.0000 Cl  0  0  0  0  0  0  0  0  0  0  0  0
    2.1434   -0.4125    0.0000 Cl  0  0  0  0  0  0  0  0  0  0  0  0
    0.7145    2.0625    0.0000 H   0  0  0  0  0  0  0  0  0  0  0  0
    2.1434    1.2375    0.0000 H   0  0  0  0  0  0  0  0  0  0  0  0
    0.7145   -1.2375    0.0000 H   0  0  0  0  0  0  0  0  0  0  0  0
   -0.7145   -0.4125    0.0000 H   0  0  0  0  0  0  0  0  0  0  0  0
  1  2  4  0  0  0  0
  2  3  4  0  0  0  0
  3  4  4  0  0  0  0
  4  5  4  0  0  0  0
  5  6  4  0  0  0  0
  1  6  4  0  0  0  0
  6  7  1  0  0  0  0
  3  8  1  0  0  0  0
  1  9  1  0  0  0  0
  2 10  1  0  0  0  0
  4 11  1  0  0  0  0
  5 12  1  0  0  0  0
M  END
$$$$
42
  Mrv2314 01052423262D          

 14 14  0  0  0  0            999 V2000
    0.7145    1.2375    0.0000 C   0  0  0  0  0  0  0  0  0  0  0  0
    1.4289    0.8250    0.0000 C   0  0  0  0  0  0  0  0  0  0  0  0
    1.4289   -0.0000    0.0000 O   0  0  0  0  0  0  0  0  0  0  0  0
    0.7145   -0.4125    0.0000 C   0  0  0  0  0  0  0  0  0  0  0  0
    0.0000    0.0000    0.0000 C   0  0  0  0  0  0  0  0  0  0  0  0
    0.0000    0.8250    0.0000 O   0  0  0  0  0  0  0  0  0  0  0  0
    1.0847    1.9747    0.0000 H   0  0  0  0  0  0  0  0  0  0  0  0
    0.3442    1.9747    0.0000 H   0  0  0  0  0  0  0  0  0  0  0  0
    2.2525    0.8730    0.0000 H   0  0  0  0  0  0  0  0  0  0  0  0
    1.8823    1.5143    0.0000 H   0  0  0  0  0  0  0  0  0  0  0  0
    0.3442   -1.1497    0.0000 H   0  0  0  0  0  0  0  0  0  0  0  0
    1.0847   -1.1497    0.0000 H   0  0  0  0  0  0  0  0  0  0  0  0
   -0.8236   -0.0480    0.0000 H   0  0  0  0  0  0  0  0  0  0  0  0
   -0.4533   -0.6893    0.0000 H   0  0  0  0  0  0  0  0  0  0  0  0
  1  2  1  0  0  0  0
  2  3  1  0  0  0  0
  3  4  1  0  0  0  0
  4  5  1  0  0  0  0
  5  6  1  0  0  0  0
  1  6  1  0  0  0  0
  1  7  1  0  0  0  0
  1  8  1  0  0  0  0
  2  9  1  0  0  0  0
  2 10  1  0  0  0  0
  4 11  1  0  0  0  0
  4 12  1  0  0  0  0
  5 13  1  0  0  0  0
  5 14  1  0  0  0  0
M  END
$$$$
43
  Mrv2314 01052423262D          

 30 30  0  0  0  0            999 V2000
    1.4289    0.8250    0.0000 C   0  0  0  0  0  0  0  0  0  0  0  0
    2.1434    1.2375    0.0000 C   0  0  0  0  0  0  0  0  0  0  0  0
    2.8579    0.8250    0.0000 C   0  0  0  0  0  0  0  0  0  0  0  0
    2.8579   -0.0000    0.0000 C   0  0  0  0  0  0  0  0  0  0  0  0
    2.1434   -0.4125    0.0000 C   0  0  0  0  0  0  0  0  0  0  0  0
    2.1434   -1.2375    0.0000 C   0  0  0  0  0  0  0  0  0  0  0  0
    1.4289   -1.6500    0.0000 C   0  0  0  0  0  0  0  0  0  0  0  0
    0.7145   -1.2375    0.0000 C   0  0  0  0  0  0  0  0  0  0  0  0
    0.7145   -0.4125    0.0000 C   0  0  0  0  0  0  0  0  0  0  0  0
   -0.0000    0.0000    0.0000 C   0  0  0  0  0  0  0  0  0  0  0  0
   -0.0000    0.8250    0.0000 C   0  0  0  0  0  0  0  0  0  0  0  0
    0.7145    1.2375    0.0000 C   0  0  0  0  0  0  0  0  0  0  0  0
    1.0587    0.0878    0.0000 H   0  0  0  0  0  0  0  0  0  0  0  0
    1.7992    0.0878    0.0000 H   0  0  0  0  0  0  0  0  0  0  0  0
    2.5137    1.9747    0.0000 H   0  0  0  0  0  0  0  0  0  0  0  0
    1.7732    1.9747    0.0000 H   0  0  0  0  0  0  0  0  0  0  0  0
    3.5724    1.2375    0.0000 H   0  0  0  0  0  0  0  0  0  0  0  0
    3.5724   -0.4125    0.0000 H   0  0  0  0  0  0  0  0  0  0  0  0
    1.3556   -0.6574    0.0000 H   0  0  0  0  0  0  0  0  0  0  0  0
    2.8579   -0.8250    0.0000 H   0  0  0  0  0  0  0  0  0  0  0  0
    2.2867   -2.0500    0.0000 H   0  0  0  0  0  0  0  0  0  0  0  0
    2.7754   -1.7678    0.0000 H   0  0  0  0  0  0  0  0  0  0  0  0
    1.0480   -2.3818    0.0000 H   0  0  0  0  0  0  0  0  0  0  0  0
   -0.0000   -1.6500    0.0000 H   0  0  0  0  0  0  0  0  0  0  0  0
   -0.0000   -0.8250    0.0000 H   0  0  0  0  0  0  0  0  0  0  0  0
    0.5326    0.3922    0.0000 H   0  0  0  0  0  0  0  0  0  0  0  0
   -0.7752    0.2822    0.0000 H   0  0  0  0  0  0  0  0  0  0  0  0
   -0.7752   -0.2822    0.0000 H   0  0  0  0  0  0  0  0  0  0  0  0
   -0.4433    1.5208    0.0000 H   0  0  0  0  0  0  0  0  0  0  0  0
    0.7145    2.0625    0.0000 H   0  0  0  0  0  0  0  0  0  0  0  0
  1  2  1  0  0  0  0
  2  3  1  0  0  0  0
  3  4  2  0  0  0  0
  4  5  1  0  0  0  0
  5  6  1  0  0  0  0
  6  7  1  0  0  0  0
  7  8  2  0  0  0  0
  8  9  1  0  0  0  0
  9 10  1  0  0  0  0
 10 11  1  0  0  0  0
 11 12  2  0  0  0  0
  1 12  1  0  0  0  0
  1 13  1  0  0  0  0
  1 14  1  0  0  0  0
  2 15  1  0  0  0  0
  2 16  1  0  0  0  0
  3 17  1  4  0  0  0
  4 18  1  0  0  0  0
  5 19  1  0  0  0  0
  5 20  1  0  0  0  0
  6 21  1  0  0  0  0
  6 22  1  0  0  0  0
  7 23  1  4  0  0  0
  8 24  1  0  0  0  0
  9 25  1  0  0  0  0
  9 26  1  0  0  0  0
 10 27  1  0  0  0  0
 10 28  1  0  0  0  0
 11 29  1  4  0  0  0
 12 30  1  0  0  0  0
M  END
$$$$
44
  Mrv2314 01052423262D          

 22 23  0  0  0  0            999 V2000
   -0.7145   -1.2375    0.0000 C   0  0  0  0  0  0  0  0  0  0  0  0
    0.0000   -1.6500    0.0000 C   0  0  0  0  0  0  0  0  0  0  0  0
    0.7145   -1.2375    0.0000 C   0  0  0  0  0  0  0  0  0  0  0  0
    0.7145   -0.4125    0.0000 C   0  0  0  0  0  0  0  0  0  0  0  0
    1.4289   -0.0000    0.0000 C   0  0  0  0  0  0  0  0  0  0  0  0
    2.1434   -0.4125    0.0000 C   0  0  0  0  0  0  0  0  0  0  0  0
    2.1434   -1.2375    0.0000 C   0  0  0  0  0  0  0  0  0  0  0  0
    1.4289   -1.6500    0.0000 C   0  0  0  0  0  0  0  0  0  0  0  0
    1.4289   -2.4750    0.0000 N   0  0  0  0  0  0  0  0  0  0  0  0
    0.0000   -0.0000    0.0000 C   0  0  0  0  0  0  0  0  0  0  0  0
   -0.7145   -0.4125    0.0000 C   0  0  0  0  0  0  0  0  0  0  0  0
    0.0000    0.8250    0.0000 N   0  0  0  0  0  0  0  0  0  0  0  0
   -1.4289   -1.6500    0.0000 H   0  0  0  0  0  0  0  0  0  0  0  0
    0.0000   -2.4750    0.0000 H   0  0  0  0  0  0  0  0  0  0  0  0
    1.4289    0.8250    0.0000 H   0  0  0  0  0  0  0  0  0  0  0  0
    2.8579   -0.0000    0.0000 H   0  0  0  0  0  0  0  0  0  0  0  0
    2.8579   -1.6500    0.0000 H   0  0  0  0  0  0  0  0  0  0  0  0
    0.7145   -2.8875    0.0000 H   0  0  0  0  0  0  0  0  0  0  0  0
    2.1434   -2.8875    0.0000 H   0  0  0  0  0  0  0  0  0  0  0  0
   -1.4289   -0.0000    0.0000 H   0  0  0  0  0  0  0  0  0  0  0  0
    0.7145    1.2375    0.0000 H   0  0  0  0  0  0  0  0  0  0  0  0
   -0.7145    1.2375    0.0000 H   0  0  0  0  0  0  0  0  0  0  0  0
  1  2  4  0  0  0  0
  2  3  4  0  0  0  0
  3  4  4  0  0  0  0
  4  5  4  0  0  0  0
  5  6  4  0  0  0  0
  6  7  4  0  0  0  0
  7  8  4  0  0  0  0
  3  8  4  0  0  0  0
  8  9  1  0  0  0  0
  4 10  4  0  0  0  0
 10 11  4  0  0  0  0
  1 11  4  0  0  0  0
 10 12  1  0  0  0  0
  1 13  1  0  0  0  0
  2 14  1  0  0  0  0
  5 15  1  0  0  0  0
  6 16  1  0  0  0  0
  7 17  1  0  0  0  0
  9 18  1  0  0  0  0
  9 19  1  0  0  0  0
 11 20  1  0  0  0  0
 12 21  1  0  0  0  0
 12 22  1  0  0  0  0
M  END
$$$$
45
  Mrv2314 01052423262D          

 83 87  0  0  0  0            999 V2000
   -0.6283    0.0762    0.0000 C   0  0  0  0  0  0  0  0  0  0  0  0
   -0.0980   -0.5558    0.0000 N   0  0  0  0  0  0  0  0  0  0  0  0
   -0.3802   -1.3310    0.0000 C   0  0  0  0  0  0  0  0  0  0  0  0
    0.7145   -0.4125    0.0000 C   0  0  0  0  0  0  0  0  0  0  0  0
    0.9966    0.3627    0.0000 O   0  0  0  0  0  0  0  0  0  0  0  0
    1.2448   -1.0445    0.0000 C   0  0  0  0  0  0  0  0  0  0  0  0
    1.9592   -1.4570    0.0000 C   0  0  0  0  0  0  0  0  0  0  0  0
    1.9592   -2.2820    0.0000 C   0  0  0  0  0  0  0  0  0  0  0  0
    1.2448   -2.6945    0.0000 N   0  0  0  0  0  0  0  0  0  0  0  0
    0.5303   -2.2820    0.0000 C   0  0  0  0  0  0  0  0  0  0  0  0
    0.5303   -1.4570    0.0000 C   0  0  0  0  0  0  0  0  0  0  0  0
    1.2448   -3.5195    0.0000 C   0  0  0  0  0  0  0  0  0  0  0  0
    0.5303   -3.9320    0.0000 C   0  0  0  0  0  0  0  0  0  0  0  0
    0.5303   -4.7570    0.0000 C   0  0  0  0  0  0  0  0  0  0  0  0
    0.8125   -5.5322    0.0000 C   0  0  0  0  0  0  0  0  0  0  0  0
    0.2822   -6.1642    0.0000 N   0  0  0  0  0  0  0  0  0  0  0  0
   -0.5303   -6.0210    0.0000 C   0  0  0  0  0  0  0  0  0  0  0  0
   -0.8125   -5.2457    0.0000 C   0  0  0  0  0  0  0  0  0  0  0  0
   -0.2822   -4.6137    0.0000 O   0  0  0  0  0  0  0  0  0  0  0  0
    0.5643   -6.9395    0.0000 C   0  0  0  0  0  0  0  0  0  0  0  0
    1.3768   -7.0827    0.0000 O   0  0  0  0  0  0  0  0  0  0  0  0
    0.0340   -7.5715    0.0000 C   0  0  0  0  0  0  0  0  0  0  0  0
    0.3162   -8.3467    0.0000 C   0  0  0  0  0  0  0  0  0  0  0  0
   -0.2141   -8.9787    0.0000 C   0  0  0  0  0  0  0  0  0  0  0  0
   -1.0266   -8.8354    0.0000 C   0  0  0  0  0  0  0  0  0  0  0  0
   -1.3087   -8.0602    0.0000 C   0  0  0  0  0  0  0  0  0  0  0  0
   -0.7784   -7.4282    0.0000 C   0  0  0  0  0  0  0  0  0  0  0  0
    1.3428   -4.6137    0.0000 C   0  0  0  0  0  0  0  0  0  0  0  0
    1.6249   -3.8385    0.0000 C   0  0  0  0  0  0  0  0  0  0  0  0
    2.4374   -3.6952    0.0000 C   0  0  0  0  0  0  0  0  0  0  0  0
    2.9677   -4.3272    0.0000 C   0  0  0  0  0  0  0  0  0  0  0  0
    2.6855   -5.1025    0.0000 C   0  0  0  0  0  0  0  0  0  0  0  0
    1.8731   -5.2457    0.0000 C   0  0  0  0  0  0  0  0  0  0  0  0
    3.7802   -4.1839    0.0000 Cl  0  0  0  0  0  0  0  0  0  0  0  0
    2.7196   -2.9200    0.0000 Cl  0  0  0  0  0  0  0  0  0  0  0  0
    1.7751   -0.4125    0.0000 N   0  0  0  0  0  0  0  0  0  0  0  0
    1.4929    0.3627    0.0000 C   0  0  0  0  0  0  0  0  0  0  0  0
    2.0232    0.9947    0.0000 C   0  0  0  0  0  0  0  0  0  0  0  0
    2.8357    0.8515    0.0000 C   0  0  0  0  0  0  0  0  0  0  0  0
    3.1178    0.0762    0.0000 C   0  0  0  0  0  0  0  0  0  0  0  0
    2.5875   -0.5558    0.0000 C   0  0  0  0  0  0  0  0  0  0  0  0
    0.0037    0.6065    0.0000 H   0  0  0  0  0  0  0  0  0  0  0  0
   -1.1586    0.7082    0.0000 H   0  0  0  0  0  0  0  0  0  0  0  0
   -1.2603   -0.4541    0.0000 H   0  0  0  0  0  0  0  0  0  0  0  0
   -1.0170   -0.8066    0.0000 H   0  0  0  0  0  0  0  0  0  0  0  0
   -1.0869   -1.7567    0.0000 H   0  0  0  0  0  0  0  0  0  0  0  0
   -0.2144   -2.1392    0.0000 H   0  0  0  0  0  0  0  0  0  0  0  0
    2.7828   -1.4090    0.0000 H   0  0  0  0  0  0  0  0  0  0  0  0
    2.4126   -0.7677    0.0000 H   0  0  0  0  0  0  0  0  0  0  0  0
    2.4126   -2.9713    0.0000 H   0  0  0  0  0  0  0  0  0  0  0  0
    2.7828   -2.3300    0.0000 H   0  0  0  0  0  0  0  0  0  0  0  0
    0.2424   -3.0551    0.0000 H   0  0  0  0  0  0  0  0  0  0  0  0
    1.2448   -1.8695    0.0000 H   0  0  0  0  0  0  0  0  0  0  0  0
    0.7106   -0.6519    0.0000 H   0  0  0  0  0  0  0  0  0  0  0  0
    0.0601   -0.7791    0.0000 H   0  0  0  0  0  0  0  0  0  0  0  0
    1.9925   -3.1708    0.0000 H   0  0  0  0  0  0  0  0  0  0  0  0
    0.5303   -3.1070    0.0000 H   0  0  0  0  0  0  0  0  0  0  0  0
   -0.2843   -4.0623    0.0000 H   0  0  0  0  0  0  0  0  0  0  0  0
    1.2448   -4.3445    0.0000 H   0  0  0  0  0  0  0  0  0  0  0  0
    1.4742   -6.0249    0.0000 H   0  0  0  0  0  0  0  0  0  0  0  0
    1.6028   -5.2956    0.0000 H   0  0  0  0  0  0  0  0  0  0  0  0
   -1.2878   -6.3477    0.0000 H   0  0  0  0  0  0  0  0  0  0  0  0
   -0.7206   -6.8237    0.0000 H   0  0  0  0  0  0  0  0  0  0  0  0
   -1.4742   -4.7531    0.0000 H   0  0  0  0  0  0  0  0  0  0  0  0
   -1.6028   -5.4823    0.0000 H   0  0  0  0  0  0  0  0  0  0  0  0
    1.1287   -8.4900    0.0000 H   0  0  0  0  0  0  0  0  0  0  0  0
    0.0681   -9.7539    0.0000 H   0  0  0  0  0  0  0  0  0  0  0  0
   -1.5569   -9.4674    0.0000 H   0  0  0  0  0  0  0  0  0  0  0  0
   -2.1212   -7.9169    0.0000 H   0  0  0  0  0  0  0  0  0  0  0  0
   -1.5393   -7.1094    0.0000 H   0  0  0  0  0  0  0  0  0  0  0  0
    2.1552   -4.4705    0.0000 H   0  0  0  0  0  0  0  0  0  0  0  0
    3.2158   -5.7344    0.0000 H   0  0  0  0  0  0  0  0  0  0  0  0
    2.3632   -5.9094    0.0000 H   0  0  0  0  0  0  0  0  0  0  0  0
    1.1442    1.1105    0.0000 H   0  0  0  0  0  0  0  0  0  0  0  0
    1.0197   -0.3131    0.0000 H   0  0  0  0  0  0  0  0  0  0  0  0
    2.4235    1.7161    0.0000 H   0  0  0  0  0  0  0  0  0  0  0  0
    1.8583    1.8031    0.0000 H   0  0  0  0  0  0  0  0  0  0  0  0
    3.6601    0.8822    0.0000 H   0  0  0  0  0  0  0  0  0  0  0  0
    3.4356    1.4178    0.0000 H   0  0  0  0  0  0  0  0  0  0  0  0
    3.7796   -0.4164    0.0000 H   0  0  0  0  0  0  0  0  0  0  0  0
    3.9082    0.3128    0.0000 H   0  0  0  0  0  0  0  0  0  0  0  0
    3.3896   -0.7491    0.0000 H   0  0  0  0  0  0  0  0  0  0  0  0
    2.3054    0.2195    0.0000 H   0  0  0  0  0  0  0  0  0  0  0  0
  1  2  1  0  0  0  0
  2  3  1  0  0  0  0
  2  4  1  0  0  0  0
  4  5  2  0  0  0  0
  4  6  1  0  0  0  0
  6  7  1  0  0  0  0
  7  8  1  0  0  0  0
  8  9  1  0  0  0  0
  9 10  1  0  0  0  0
 10 11  1  0  0  0  0
  6 11  1  0  0  0  0
  9 12  1  0  0  0  0
 12 13  1  0  0  0  0
 13 14  1  0  0  0  0
 14 15  1  0  0  0  0
 15 16  1  0  0  0  0
 16 17  1  0  0  0  0
 17 18  1  0  0  0  0
 18 19  1  0  0  0  0
 14 19  1  0  0  0  0
 16 20  1  0  0  0  0
 20 21  2  0  0  0  0
 20 22  1  0  0  0  0
 22 23  4  0  0  0  0
 23 24  4  0  0  0  0
 24 25  4  0  0  0  0
 25 26  4  0  0  0  0
 26 27  4  0  0  0  0
 22 27  4  0  0  0  0
 14 28  1  0  0  0  0
 28 29  4  0  0  0  0
 29 30  4  0  0  0  0
 30 31  4  0  0  0  0
 31 32  4  0  0  0  0
 32 33  4  0  0  0  0
 28 33  4  0  0  0  0
 31 34  1  0  0  0  0
 30 35  1  0  0  0  0
  6 36  1  0  0  0  0
 36 37  1  0  0  0  0
 37 38  1  0  0  0  0
 38 39  1  0  0  0  0
 39 40  1  0  0  0  0
 40 41  1  0  0  0  0
 36 41  1  0  0  0  0
  1 42  1  0  0  0  0
  1 43  1  0  0  0  0
  1 44  1  0  0  0  0
  3 45  1  0  0  0  0
  3 46  1  0  0  0  0
  3 47  1  0  0  0  0
  7 48  1  0  0  0  0
  7 49  1  0  0  0  0
  8 50  1  0  0  0  0
  8 51  1  0  0  0  0
 10 52  1  0  0  0  0
 10 53  1  0  0  0  0
 11 54  1  0  0  0  0
 11 55  1  0  0  0  0
 12 56  1  0  0  0  0
 12 57  1  0  0  0  0
 13 58  1  0  0  0  0
 13 59  1  0  0  0  0
 15 60  1  0  0  0  0
 15 61  1  0  0  0  0
 17 62  1  0  0  0  0
 17 63  1  0  0  0  0
 18 64  1  0  0  0  0
 18 65  1  0  0  0  0
 23 66  1  0  0  0  0
 24 67  1  0  0  0  0
 25 68  1  0  0  0  0
 26 69  1  0  0  0  0
 27 70  1  0  0  0  0
 29 71  1  0  0  0  0
 32 72  1  0  0  0  0
 33 73  1  0  0  0  0
 37 74  1  0  0  0  0
 37 75  1  0  0  0  0
 38 76  1  0  0  0  0
 38 77  1  0  0  0  0
 39 78  1  0  0  0  0
 39 79  1  0  0  0  0
 40 80  1  0  0  0  0
 40 81  1  0  0  0  0
 41 82  1  0  0  0  0
 41 83  1  0  0  0  0
M  END
$$$$
46
  Mrv2314 01052423262D          

 71 74  0  0  1  0            999 V2000
    5.8522    0.0403    0.0000 C   0  0  0  0  0  0  0  0  0  0  0  0
    6.5667    0.4528    0.0000 C   0  0  0  0  0  0  0  0  0  0  0  0
    7.2812    0.0403    0.0000 C   0  0  0  0  0  0  0  0  0  0  0  0
    7.9956    0.4528    0.0000 C   0  0  0  0  0  0  0  0  0  0  0  0
    8.7101    0.0403    0.0000 C   0  0  0  0  0  0  0  0  0  0  0  0
    9.4246    0.4528    0.0000 C   0  0  0  0  0  0  0  0  0  0  0  0
    9.4246    1.2778    0.0000 O   0  0  0  0  0  0  0  0  0  0  0  0
   10.1391    0.0403    0.0000 O   0  0  0  0  0  0  0  0  0  0  0  0
   10.8535    0.4528    0.0000 C   0  0  2  0  0  0  0  0  0  0  0  0
   11.4666    1.0048    0.0000 C   0  0  0  0  0  0  0  0  0  0  0  0
   12.1811    0.5923    0.0000 C   0  0  0  0  0  0  0  0  0  0  0  0
   12.0096   -0.2146    0.0000 C   0  0  2  0  0  0  0  0  0  0  0  0
   11.1891   -0.3009    0.0000 C   0  0  2  0  0  0  0  0  0  0  0  0
   10.8535   -1.0545    0.0000 C   0  0  0  0  0  0  0  0  0  0  0  0
   11.3385   -1.7220    0.0000 C   0  0  0  0  0  0  0  0  0  0  0  0
   12.1589   -1.6357    0.0000 C   0  0  1  0  0  0  0  0  0  0  0  0
   12.4945   -0.8821    0.0000 C   0  0  1  0  0  0  0  0  0  0  0  0
   13.3150   -0.7958    0.0000 C   0  0  0  0  0  0  0  0  0  0  0  0
   13.7999   -1.4633    0.0000 C   0  0  0  0  0  0  0  0  0  0  0  0
   13.4643   -2.2169    0.0000 C   0  0  0  0  0  0  0  0  0  0  0  0
   13.9493   -2.8844    0.0000 C   0  0  0  0  0  0  0  0  0  0  0  0
   13.6137   -3.6381    0.0000 C   0  0  0  0  0  0  0  0  0  0  0  0
   14.0986   -4.3055    0.0000 O   0  0  0  0  0  0  0  0  0  0  0  0
   12.7932   -3.7243    0.0000 C   0  0  0  0  0  0  0  0  0  0  0  0
   12.3083   -3.0569    0.0000 C   0  0  0  0  0  0  0  0  0  0  0  0
   12.6439   -2.3032    0.0000 C   0  0  2  0  0  0  0  0  0  0  0  0
   11.8234   -2.3894    0.0000 C   0  0  0  0  0  0  0  0  0  0  0  0
   10.3641   -0.3009    0.0000 C   0  0  0  0  0  0  0  0  0  0  0  0
   10.3686    1.1203    0.0000 C   0  0  0  0  0  0  0  0  0  0  0  0
   10.7042    1.8739    0.0000 O   0  0  0  0  0  0  0  0  0  0  0  0
    9.6541    1.5328    0.0000 C   0  0  0  0  0  0  0  0  0  0  0  0
    5.4397    0.7548    0.0000 H   0  0  0  0  0  0  0  0  0  0  0  0
    5.1378   -0.3722    0.0000 H   0  0  0  0  0  0  0  0  0  0  0  0
    6.2647   -0.6742    0.0000 H   0  0  0  0  0  0  0  0  0  0  0  0
    6.9370    1.1901    0.0000 H   0  0  0  0  0  0  0  0  0  0  0  0
    6.1964    1.1901    0.0000 H   0  0  0  0  0  0  0  0  0  0  0  0
    6.9109   -0.6969    0.0000 H   0  0  0  0  0  0  0  0  0  0  0  0
    7.6514   -0.6969    0.0000 H   0  0  0  0  0  0  0  0  0  0  0  0
    8.3659    1.1901    0.0000 H   0  0  0  0  0  0  0  0  0  0  0  0
    7.6254    1.1901    0.0000 H   0  0  0  0  0  0  0  0  0  0  0  0
    8.3399   -0.6969    0.0000 H   0  0  0  0  0  0  0  0  0  0  0  0
    9.0804   -0.6969    0.0000 H   0  0  0  0  0  0  0  0  0  0  0  0
   11.7757    1.7698    0.0000 H   0  0  0  0  0  0  0  0  0  0  0  0
   11.0053    1.6888    0.0000 H   0  0  0  0  0  0  0  0  0  0  0  0
   13.0041    0.5348    0.0000 H   0  0  0  0  0  0  0  0  0  0  0  0
   12.6890    1.2425    0.0000 H   0  0  0  0  0  0  0  0  0  0  0  0
   11.6740   -0.9683    0.0000 H   0  0  0  0  0  0  0  0  0  0  0  0
   10.0536   -1.2565    0.0000 H   0  0  0  0  0  0  0  0  0  0  0  0
   10.3784   -1.7290    0.0000 H   0  0  0  0  0  0  0  0  0  0  0  0
   10.7280   -2.2770    0.0000 H   0  0  0  0  0  0  0  0  0  0  0  0
   11.2542   -2.5427    0.0000 H   0  0  0  0  0  0  0  0  0  0  0  0
   12.9794   -1.5495    0.0000 H   0  0  0  0  0  0  0  0  0  0  0  0
   12.8301   -0.1284    0.0000 H   0  0  0  0  0  0  0  0  0  0  0  0
   14.1080   -0.5684    0.0000 H   0  0  0  0  0  0  0  0  0  0  0  0
   13.7763   -0.1119    0.0000 H   0  0  0  0  0  0  0  0  0  0  0  0
   14.4125   -2.0159    0.0000 H   0  0  0  0  0  0  0  0  0  0  0  0
   14.6248   -1.4769    0.0000 H   0  0  0  0  0  0  0  0  0  0  0  0
   14.7697   -2.7981    0.0000 H   0  0  0  0  0  0  0  0  0  0  0  0
   12.1551   -4.2472    0.0000 H   0  0  0  0  0  0  0  0  0  0  0  0
   12.8316   -4.5484    0.0000 H   0  0  0  0  0  0  0  0  0  0  0  0
   11.5153   -3.2843    0.0000 H   0  0  0  0  0  0  0  0  0  0  0  0
   11.8470   -3.7408    0.0000 H   0  0  0  0  0  0  0  0  0  0  0  0
   11.2204   -2.9524    0.0000 H   0  0  0  0  0  0  0  0  0  0  0  0
   11.7371   -1.5689    0.0000 H   0  0  0  0  0  0  0  0  0  0  0  0
   11.0455   -2.1145    0.0000 H   0  0  0  0  0  0  0  0  0  0  0  0
    9.5562   -0.1336    0.0000 H   0  0  0  0  0  0  0  0  0  0  0  0
    9.6738   -0.7526    0.0000 H   0  0  0  0  0  0  0  0  0  0  0  0
   10.1940   -1.1081    0.0000 H   0  0  0  0  0  0  0  0  0  0  0  0
   10.3340    2.0000    0.0000 H   0  0  0  0  0  0  0  0  0  0  0  0
    9.5251    2.3476    0.0000 H   0  0  0  0  0  0  0  0  0  0  0  0
    8.8631    1.7671    0.0000 H   0  0  0  0  0  0  0  0  0  0  0  0
  1  2  1  0  0  0  0
  2  3  1  0  0  0  0
  3  4  1  0  0  0  0
  4  5  1  0  0  0  0
  5  6  1  0  0  0  0
  6  7  2  0  0  0  0
  6  8  1  0  0  0  0
  9  8  1  6  0  0  0
  9 10  1  0  0  0  0
 10 11  1  0  0  0  0
 12 11  1  0  0  0  0
 12 13  1  0  0  0  0
 13  9  1  0  0  0  0
 13 14  1  0  0  0  0
 14 15  1  0  0  0  0
 16 15  1  0  0  0  0
 17 16  1  0  0  0  0
 12 17  1  0  0  0  0
 17 18  1  0  0  0  0
 18 19  1  0  0  0  0
 19 20  1  0  0  0  0
 20 21  2  0  0  0  0
 21 22  1  0  0  0  0
 22 23  2  0  0  0  0
 22 24  1  0  0  0  0
 24 25  1  0  0  0  0
 26 25  1  0  0  0  0
 16 26  1  0  0  0  0
 26 20  1  0  0  0  0
 26 27  1  1  0  0  0
 13 28  1  1  0  0  0
  9 29  1  1  0  0  0
 29 30  2  0  0  0  0
 29 31  1  0  0  0  0
  1 32  1  0  0  0  0
  1 33  1  0  0  0  0
  1 34  1  0  0  0  0
  2 35  1  0  0  0  0
  2 36  1  0  0  0  0
  3 37  1  0  0  0  0
  3 38  1  0  0  0  0
  4 39  1  0  0  0  0
  4 40  1  0  0  0  0
  5 41  1  0  0  0  0
  5 42  1  0  0  0  0
 10 43  1  0  0  0  0
 10 44  1  0  0  0  0
 11 45  1  0  0  0  0
 11 46  1  0  0  0  0
 12 47  1  6  0  0  0
 14 48  1  0  0  0  0
 14 49  1  0  0  0  0
 15 50  1  0  0  0  0
 15 51  1  0  0  0  0
 16 52  1  6  0  0  0
 17 53  1  1  0  0  0
 18 54  1  0  0  0  0
 18 55  1  0  0  0  0
 19 56  1  0  0  0  0
 19 57  1  0  0  0  0
 21 58  1  0  0  0  0
 24 59  1  0  0  0  0
 24 60  1  0  0  0  0
 25 61  1  0  0  0  0
 25 62  1  0  0  0  0
 27 63  1  0  0  0  0
 27 64  1  0  0  0  0
 27 65  1  0  0  0  0
 28 66  1  0  0  0  0
 28 67  1  0  0  0  0
 28 68  1  0  0  0  0
 31 69  1  0  0  0  0
 31 70  1  0  0  0  0
 31 71  1  0  0  0  0
M  END
$$$$
47
  Mrv2314 01052423262D          

 44 47  0  0  1  0            999 V2000
    4.3228   -0.9107    0.0000 C   0  0  0  0  0  0  0  0  0  0  0  0
    3.9629   -0.1684    0.0000 C   0  0  2  0  0  0  0  0  0  0  0  0
    3.4311   -0.7991    0.0000 C   0  0  0  0  0  0  0  0  0  0  0  0
    2.6190   -0.6539    0.0000 C   0  0  0  0  0  0  0  0  0  0  0  0
    2.3387    0.1221    0.0000 C   0  0  1  0  0  0  0  0  0  0  0  0
    2.8705    0.7528    0.0000 C   0  0  2  0  0  0  0  0  0  0  0  0
    3.6826    0.6076    0.0000 C   0  0  2  0  0  0  0  0  0  0  0  0
    4.3340    1.1139    0.0000 C   0  0  0  0  0  0  0  0  0  0  0  0
    5.0168    0.6509    0.0000 C   0  0  0  0  0  0  0  0  0  0  0  0
    4.7875   -0.1416    0.0000 C   0  0  1  0  0  0  0  0  0  0  0  0
    5.2939   -0.7929    0.0000 O   0  0  0  0  0  0  0  0  0  0  0  0
    2.5902    1.5287    0.0000 C   0  0  0  0  0  0  0  0  0  0  0  0
    1.7781    1.6739    0.0000 C   0  0  0  0  0  0  0  0  0  0  0  0
    1.2463    1.0432    0.0000 C   0  0  0  0  0  0  0  0  0  0  0  0
    1.5266    0.2673    0.0000 C   0  0  0  0  0  0  0  0  0  0  0  0
    0.9948   -0.3634    0.0000 C   0  0  0  0  0  0  0  0  0  0  0  0
    0.1827   -0.2182    0.0000 C   0  0  0  0  0  0  0  0  0  0  0  0
   -0.0976    0.5577    0.0000 C   0  0  0  0  0  0  0  0  0  0  0  0
    0.4342    1.1884    0.0000 C   0  0  0  0  0  0  0  0  0  0  0  0
   -0.9098    0.7029    0.0000 O   0  0  0  0  0  0  0  0  0  0  0  0
    3.8421   -1.5812    0.0000 H   0  0  0  0  0  0  0  0  0  0  0  0
    4.6827   -1.6531    0.0000 H   0  0  0  0  0  0  0  0  0  0  0  0
    5.1469   -0.9487    0.0000 H   0  0  0  0  0  0  0  0  0  0  0  0
    2.9438   -1.4647    0.0000 H   0  0  0  0  0  0  0  0  0  0  0  0
    3.1508   -0.0231    0.0000 H   0  0  0  0  0  0  0  0  0  0  0  0
    1.7941   -0.6629    0.0000 H   0  0  0  0  0  0  0  0  0  0  0  0
    1.9970   -1.1958    0.0000 H   0  0  0  0  0  0  0  0  0  0  0  0
    2.0584    0.8980    0.0000 H   0  0  0  0  0  0  0  0  0  0  0  0
    3.4023    1.3835    0.0000 H   0  0  0  0  0  0  0  0  0  0  0  0
    4.4751    0.3783    0.0000 H   0  0  0  0  0  0  0  0  0  0  0  0
    4.9387    1.6751    0.0000 H   0  0  0  0  0  0  0  0  0  0  0  0
    4.3791    1.9377    0.0000 H   0  0  0  0  0  0  0  0  0  0  0  0
    5.8335    0.5342    0.0000 H   0  0  0  0  0  0  0  0  0  0  0  0
    5.5703    1.2627    0.0000 H   0  0  0  0  0  0  0  0  0  0  0  0
    5.5977    0.0139    0.0000 H   0  0  0  0  0  0  0  0  0  0  0  0
    5.9937   -1.2298    0.0000 H   0  0  0  0  0  0  0  0  0  0  0  0
    3.0044    2.2422    0.0000 H   0  0  0  0  0  0  0  0  0  0  0  0
    2.4489    2.3415    0.0000 H   0  0  0  0  0  0  0  0  0  0  0  0
    1.4061    2.4103    0.0000 H   0  0  0  0  0  0  0  0  0  0  0  0
    1.0136    1.9841    0.0000 H   0  0  0  0  0  0  0  0  0  0  0  0
    0.7765   -1.1590    0.0000 H   0  0  0  0  0  0  0  0  0  0  0  0
   -0.3492   -0.8489    0.0000 H   0  0  0  0  0  0  0  0  0  0  0  0
    0.1539    1.9643    0.0000 H   0  0  0  0  0  0  0  0  0  0  0  0
   -1.1901    1.4789    0.0000 H   0  0  0  0  0  0  0  0  0  0  0  0
  2  1  1  6  0  0  0
  2  3  1  0  0  0  0
  3  4  1  0  0  0  0
  5  4  1  0  0  0  0
  6  5  1  0  0  0  0
  7  6  1  0  0  0  0
  2  7  1  0  0  0  0
  7  8  1  0  0  0  0
  8  9  1  0  0  0  0
 10  9  1  0  0  0  0
  2 10  1  0  0  0  0
 10 11  1  1  0  0  0
  6 12  1  0  0  0  0
 12 13  1  0  0  0  0
 13 14  1  0  0  0  0
 14 15  4  0  0  0  0
  5 15  1  0  0  0  0
 15 16  4  0  0  0  0
 16 17  4  0  0  0  0
 17 18  4  0  0  0  0
 18 19  4  0  0  0  0
 14 19  4  0  0  0  0
 18 20  1  0  0  0  0
  1 21  1  0  0  0  0
  1 22  1  0  0  0  0
  1 23  1  0  0  0  0
  3 24  1  0  0  0  0
  3 25  1  0  0  0  0
  4 26  1  0  0  0  0
  4 27  1  0  0  0  0
  5 28  1  1  0  0  0
  6 29  1  6  0  0  0
  7 30  1  1  0  0  0
  8 31  1  0  0  0  0
  8 32  1  0  0  0  0
  9 33  1  0  0  0  0
  9 34  1  0  0  0  0
 10 35  1  6  0  0  0
 11 36  1  0  0  0  0
 12 37  1  0  0  0  0
 12 38  1  0  0  0  0
 13 39  1  0  0  0  0
 13 40  1  0  0  0  0
 16 41  1  0  0  0  0
 17 42  1  0  0  0  0
 19 43  1  0  0  0  0
 20 44  1  0  0  0  0
M  END
$$$$
48
  Mrv2314 01052423262D          

 46 49  0  0  1  0            999 V2000
    4.3228   -0.9107    0.0000 C   0  0  0  0  0  0  0  0  0  0  0  0
    3.9629   -0.1684    0.0000 C   0  0  2  0  0  0  0  0  0  0  0  0
    3.4311   -0.7991    0.0000 C   0  0  0  0  0  0  0  0  0  0  0  0
    2.6190   -0.6539    0.0000 C   0  0  0  0  0  0  0  0  0  0  0  0
    2.3387    0.1221    0.0000 C   0  0  1  0  0  0  0  0  0  0  0  0
    2.8705    0.7528    0.0000 C   0  0  2  0  0  0  0  0  0  0  0  0
    3.6826    0.6076    0.0000 C   0  0  2  0  0  0  0  0  0  0  0  0
    4.3340    1.1139    0.0000 C   0  0  0  0  0  0  0  0  0  0  0  0
    5.0168    0.6509    0.0000 C   0  0  0  0  0  0  0  0  0  0  0  0
    4.7875   -0.1416    0.0000 C   0  0  1  0  0  0  0  0  0  0  0  0
    5.5484   -0.4604    0.0000 C   0  0  0  0  0  0  0  0  0  0  0  0
    6.3093   -0.7793    0.0000 C   0  0  0  0  0  0  0  0  0  0  0  0
    4.9089   -0.9576    0.0000 O   0  0  0  0  0  0  0  0  0  0  0  0
    2.5902    1.5287    0.0000 C   0  0  0  0  0  0  0  0  0  0  0  0
    1.7781    1.6739    0.0000 C   0  0  0  0  0  0  0  0  0  0  0  0
    1.2463    1.0432    0.0000 C   0  0  0  0  0  0  0  0  0  0  0  0
    1.5266    0.2673    0.0000 C   0  0  0  0  0  0  0  0  0  0  0  0
    0.9948   -0.3634    0.0000 C   0  0  0  0  0  0  0  0  0  0  0  0
    0.1827   -0.2182    0.0000 C   0  0  0  0  0  0  0  0  0  0  0  0
   -0.0976    0.5577    0.0000 C   0  0  0  0  0  0  0  0  0  0  0  0
    0.4342    1.1884    0.0000 C   0  0  0  0  0  0  0  0  0  0  0  0
   -0.9098    0.7029    0.0000 O   0  0  0  0  0  0  0  0  0  0  0  0
    3.6772   -1.4244    0.0000 H   0  0  0  0  0  0  0  0  0  0  0  0
    4.2387   -1.7314    0.0000 H   0  0  0  0  0  0  0  0  0  0  0  0
    4.8508   -1.5447    0.0000 H   0  0  0  0  0  0  0  0  0  0  0  0
    2.9083   -1.4372    0.0000 H   0  0  0  0  0  0  0  0  0  0  0  0
    3.1508   -0.0231    0.0000 H   0  0  0  0  0  0  0  0  0  0  0  0
    1.7940   -0.6541    0.0000 H   0  0  0  0  0  0  0  0  0  0  0  0
    1.9880   -1.1854    0.0000 H   0  0  0  0  0  0  0  0  0  0  0  0
    2.0584    0.8980    0.0000 H   0  0  0  0  0  0  0  0  0  0  0  0
    3.4023    1.3835    0.0000 H   0  0  0  0  0  0  0  0  0  0  0  0
    4.4751    0.3783    0.0000 H   0  0  0  0  0  0  0  0  0  0  0  0
    4.9387    1.6751    0.0000 H   0  0  0  0  0  0  0  0  0  0  0  0
    4.3791    1.9377    0.0000 H   0  0  0  0  0  0  0  0  0  0  0  0
    5.8335    0.5342    0.0000 H   0  0  0  0  0  0  0  0  0  0  0  0
    5.5703    1.2627    0.0000 H   0  0  0  0  0  0  0  0  0  0  0  0
    7.0702   -1.0982    0.0000 H   0  0  0  0  0  0  0  0  0  0  0  0
    5.6312   -1.3562    0.0000 H   0  0  0  0  0  0  0  0  0  0  0  0
    3.0044    2.2422    0.0000 H   0  0  0  0  0  0  0  0  0  0  0  0
    2.4489    2.3415    0.0000 H   0  0  0  0  0  0  0  0  0  0  0  0
    1.4061    2.4103    0.0000 H   0  0  0  0  0  0  0  0  0  0  0  0
    1.0136    1.9841    0.0000 H   0  0  0  0  0  0  0  0  0  0  0  0
    0.7804   -1.1601    0.0000 H   0  0  0  0  0  0  0  0  0  0  0  0
   -0.3492   -0.8489    0.0000 H   0  0  0  0  0  0  0  0  0  0  0  0
    0.1539    1.9643    0.0000 H   0  0  0  0  0  0  0  0  0  0  0  0
   -1.1901    1.4789    0.0000 H   0  0  0  0  0  0  0  0  0  0  0  0
  2  1  1  6  0  0  0
  2  3  1  0  0  0  0
  3  4  1  0  0  0  0
  5  4  1  0  0  0  0
  6  5  1  0  0  0  0
  7  6  1  0  0  0  0
  2  7  1  0  0  0  0
  7  8  1  0  0  0  0
  8  9  1  0  0  0  0
 10  9  1  0  0  0  0
  2 10  1  0  0  0  0
 10 11  1  1  0  0  0
 11 12  3  0  0  0  0
 10 13  1  6  0  0  0
  6 14  1  0  0  0  0
 14 15  1  0  0  0  0
 15 16  1  0  0  0  0
 16 17  4  0  0  0  0
  5 17  1  0  0  0  0
 17 18  4  0  0  0  0
 18 19  4  0  0  0  0
 19 20  4  0  0  0  0
 20 21  4  0  0  0  0
 16 21  4  0  0  0  0
 20 22  1  0  0  0  0
  1 23  1  0  0  0  0
  1 24  1  0  0  0  0
  1 25  1  0  0  0  0
  3 26  1  0  0  0  0
  3 27  1  0  0  0  0
  4 28  1  0  0  0  0
  4 29  1  0  0  0  0
  5 30  1  1  0  0  0
  6 31  1  6  0  0  0
  7 32  1  1  0  0  0
  8 33  1  0  0  0  0
  8 34  1  0  0  0  0
  9 35  1  0  0  0  0
  9 36  1  0  0  0  0
 12 37  1  0  0  0  0
 13 38  1  0  0  0  0
 14 39  1  0  0  0  0
 14 40  1  0  0  0  0
 15 41  1  0  0  0  0
 15 42  1  0  0  0  0
 18 43  1  0  0  0  0
 19 44  1  0  0  0  0
 21 45  1  0  0  0  0
 22 46  1  0  0  0  0
M  END
$$$$
49
  Mrv2314 01052423262D          

 44 47  0  0  1  0            999 V2000
    4.3228   -0.9107    0.0000 C   0  0  0  0  0  0  0  0  0  0  0  0
    3.9629   -0.1684    0.0000 C   0  0  2  0  0  0  0  0  0  0  0  0
    3.4311   -0.7991    0.0000 C   0  0  0  0  0  0  0  0  0  0  0  0
    2.6190   -0.6539    0.0000 C   0  0  0  0  0  0  0  0  0  0  0  0
    2.3387    0.1221    0.0000 C   0  0  1  0  0  0  0  0  0  0  0  0
    2.8705    0.7528    0.0000 C   0  0  2  0  0  0  0  0  0  0  0  0
    3.6826    0.6076    0.0000 C   0  0  2  0  0  0  0  0  0  0  0  0
    4.3340    1.1139    0.0000 C   0  0  0  0  0  0  0  0  0  0  0  0
    5.0168    0.6509    0.0000 C   0  0  0  0  0  0  0  0  0  0  0  0
    4.7875   -0.1416    0.0000 C   0  0  2  0  0  0  0  0  0  0  0  0
    5.2939   -0.7929    0.0000 O   0  0  0  0  0  0  0  0  0  0  0  0
    2.5902    1.5287    0.0000 C   0  0  0  0  0  0  0  0  0  0  0  0
    1.7781    1.6739    0.0000 C   0  0  0  0  0  0  0  0  0  0  0  0
    1.2463    1.0432    0.0000 C   0  0  0  0  0  0  0  0  0  0  0  0
    1.5266    0.2673    0.0000 C   0  0  0  0  0  0  0  0  0  0  0  0
    0.9948   -0.3634    0.0000 C   0  0  0  0  0  0  0  0  0  0  0  0
    0.1827   -0.2182    0.0000 C   0  0  0  0  0  0  0  0  0  0  0  0
   -0.0976    0.5577    0.0000 C   0  0  0  0  0  0  0  0  0  0  0  0
    0.4342    1.1884    0.0000 C   0  0  0  0  0  0  0  0  0  0  0  0
   -0.9098    0.7029    0.0000 O   0  0  0  0  0  0  0  0  0  0  0  0
    3.8421   -1.5812    0.0000 H   0  0  0  0  0  0  0  0  0  0  0  0
    4.6827   -1.6531    0.0000 H   0  0  0  0  0  0  0  0  0  0  0  0
    5.1469   -0.9487    0.0000 H   0  0  0  0  0  0  0  0  0  0  0  0
    2.9438   -1.4647    0.0000 H   0  0  0  0  0  0  0  0  0  0  0  0
    3.1508   -0.0231    0.0000 H   0  0  0  0  0  0  0  0  0  0  0  0
    1.7941   -0.6629    0.0000 H   0  0  0  0  0  0  0  0  0  0  0  0
    1.9970   -1.1958    0.0000 H   0  0  0  0  0  0  0  0  0  0  0  0
    2.0584    0.8980    0.0000 H   0  0  0  0  0  0  0  0  0  0  0  0
    3.4023    1.3835    0.0000 H   0  0  0  0  0  0  0  0  0  0  0  0
    4.4751    0.3783    0.0000 H   0  0  0  0  0  0  0  0  0  0  0  0
    4.9387    1.6751    0.0000 H   0  0  0  0  0  0  0  0  0  0  0  0
    4.3791    1.9377    0.0000 H   0  0  0  0  0  0  0  0  0  0  0  0
    5.8335    0.5342    0.0000 H   0  0  0  0  0  0  0  0  0  0  0  0
    5.5703    1.2627    0.0000 H   0  0  0  0  0  0  0  0  0  0  0  0
    5.5977    0.0139    0.0000 H   0  0  0  0  0  0  0  0  0  0  0  0
    5.9937   -1.2298    0.0000 H   0  0  0  0  0  0  0  0  0  0  0  0
    3.0044    2.2422    0.0000 H   0  0  0  0  0  0  0  0  0  0  0  0
    2.4489    2.3415    0.0000 H   0  0  0  0  0  0  0  0  0  0  0  0
    1.4061    2.4103    0.0000 H   0  0  0  0  0  0  0  0  0  0  0  0
    1.0136    1.9841    0.0000 H   0  0  0  0  0  0  0  0  0  0  0  0
    0.7765   -1.1590    0.0000 H   0  0  0  0  0  0  0  0  0  0  0  0
   -0.3492   -0.8489    0.0000 H   0  0  0  0  0  0  0  0  0  0  0  0
    0.1539    1.9643    0.0000 H   0  0  0  0  0  0  0  0  0  0  0  0
   -1.1901    1.4789    0.0000 H   0  0  0  0  0  0  0  0  0  0  0  0
  2  1  1  6  0  0  0
  2  3  1  0  0  0  0
  3  4  1  0  0  0  0
  5  4  1  0  0  0  0
  6  5  1  0  0  0  0
  7  6  1  0  0  0  0
  2  7  1  0  0  0  0
  7  8  1  0  0  0  0
  8  9  1  0  0  0  0
 10  9  1  0  0  0  0
  2 10  1  0  0  0  0
 10 11  1  6  0  0  0
  6 12  1  0  0  0  0
 12 13  1  0  0  0  0
 13 14  1  0  0  0  0
 14 15  4  0  0  0  0
  5 15  1  0  0  0  0
 15 16  4  0  0  0  0
 16 17  4  0  0  0  0
 17 18  4  0  0  0  0
 18 19  4  0  0  0  0
 14 19  4  0  0  0  0
 18 20  1  0  0  0  0
  1 21  1  0  0  0  0
  1 22  1  0  0  0  0
  1 23  1  0  0  0  0
  3 24  1  0  0  0  0
  3 25  1  0  0  0  0
  4 26  1  0  0  0  0
  4 27  1  0  0  0  0
  5 28  1  1  0  0  0
  6 29  1  6  0  0  0
  7 30  1  1  0  0  0
  8 31  1  0  0  0  0
  8 32  1  0  0  0  0
  9 33  1  0  0  0  0
  9 34  1  0  0  0  0
 10 35  1  1  0  0  0
 11 36  1  0  0  0  0
 12 37  1  0  0  0  0
 12 38  1  0  0  0  0
 13 39  1  0  0  0  0
 13 40  1  0  0  0  0
 16 41  1  0  0  0  0
 17 42  1  0  0  0  0
 19 43  1  0  0  0  0
 20 44  1  0  0  0  0
M  END
$$$$
50
  Mrv2314 01052423262D          

 42 45  0  0  1  0            999 V2000
    1.3895   -1.8497    0.0000 C   0  0  0  0  0  0  0  0  0  0  0  0
    1.7494   -2.5921    0.0000 C   0  0  2  0  0  0  0  0  0  0  0  0
    2.2812   -1.9614    0.0000 C   0  0  0  0  0  0  0  0  0  0  0  0
    3.0934   -2.1066    0.0000 C   0  0  0  0  0  0  0  0  0  0  0  0
    3.3737   -2.8825    0.0000 C   0  0  0  0  0  0  0  0  0  0  0  0
    4.1858   -3.0277    0.0000 C   0  0  0  0  0  0  0  0  0  0  0  0
    4.7176   -2.3970    0.0000 C   0  0  0  0  0  0  0  0  0  0  0  0
    5.5297   -2.5422    0.0000 C   0  0  0  0  0  0  0  0  0  0  0  0
    5.8100   -3.3182    0.0000 C   0  0  0  0  0  0  0  0  0  0  0  0
    6.6221   -3.4634    0.0000 O   0  0  0  0  0  0  0  0  0  0  0  0
    5.2782   -3.9489    0.0000 C   0  0  0  0  0  0  0  0  0  0  0  0
    4.4661   -3.8037    0.0000 C   0  0  0  0  0  0  0  0  0  0  0  0
    3.9343   -4.4344    0.0000 C   0  0  0  0  0  0  0  0  0  0  0  0
    3.1221   -4.2891    0.0000 C   0  0  0  0  0  0  0  0  0  0  0  0
    2.8418   -3.5132    0.0000 C   0  0  1  0  0  0  0  0  0  0  0  0
    2.0297   -3.3680    0.0000 C   0  0  2  0  0  0  0  0  0  0  0  0
    1.3784   -3.8744    0.0000 C   0  0  0  0  0  0  0  0  0  0  0  0
    0.6955   -3.4114    0.0000 C   0  0  0  0  0  0  0  0  0  0  0  0
    0.9249   -2.6189    0.0000 C   0  0  2  0  0  0  0  0  0  0  0  0
    0.4185   -1.9676    0.0000 O   0  0  0  0  0  0  0  0  0  0  0  0
    1.8702   -1.1792    0.0000 H   0  0  0  0  0  0  0  0  0  0  0  0
    1.0297   -1.1073    0.0000 H   0  0  0  0  0  0  0  0  0  0  0  0
    0.5654   -1.8117    0.0000 H   0  0  0  0  0  0  0  0  0  0  0  0
    2.7686   -1.2957    0.0000 H   0  0  0  0  0  0  0  0  0  0  0  0
    3.8644   -1.8130    0.0000 H   0  0  0  0  0  0  0  0  0  0  0  0
    4.8153   -1.5778    0.0000 H   0  0  0  0  0  0  0  0  0  0  0  0
    4.1189   -1.8294    0.0000 H   0  0  0  0  0  0  0  0  0  0  0  0
    6.2880   -2.2173    0.0000 H   0  0  0  0  0  0  0  0  0  0  0  0
    5.7219   -1.7399    0.0000 H   0  0  0  0  0  0  0  0  0  0  0  0
    5.5585   -4.7248    0.0000 H   0  0  0  0  0  0  0  0  0  0  0  0
    3.8365   -5.2535    0.0000 H   0  0  0  0  0  0  0  0  0  0  0  0
    4.5330   -5.0020    0.0000 H   0  0  0  0  0  0  0  0  0  0  0  0
    2.3638   -4.6141    0.0000 H   0  0  0  0  0  0  0  0  0  0  0  0
    2.9299   -5.0914    0.0000 H   0  0  0  0  0  0  0  0  0  0  0  0
    2.3100   -4.1439    0.0000 H   0  0  0  0  0  0  0  0  0  0  0  0
    2.5615   -2.7373    0.0000 H   0  0  0  0  0  0  0  0  0  0  0  0
    0.7737   -4.4356    0.0000 H   0  0  0  0  0  0  0  0  0  0  0  0
    1.3332   -4.6981    0.0000 H   0  0  0  0  0  0  0  0  0  0  0  0
   -0.1211   -3.2946    0.0000 H   0  0  0  0  0  0  0  0  0  0  0  0
    0.1420   -4.0231    0.0000 H   0  0  0  0  0  0  0  0  0  0  0  0
    0.1146   -2.7744    0.0000 H   0  0  0  0  0  0  0  0  0  0  0  0
   -0.2813   -1.5307    0.0000 H   0  0  0  0  0  0  0  0  0  0  0  0
  2  1  1  6  0  0  0
  2  3  1  0  0  0  0
  3  4  2  0  0  0  0
  4  5  1  0  0  0  0
  5  6  2  0  0  0  0
  6  7  1  0  0  0  0
  7  8  1  0  0  0  0
  8  9  1  0  0  0  0
  9 10  2  0  0  0  0
  9 11  1  0  0  0  0
 11 12  2  0  0  0  0
  6 12  1  0  0  0  0
 12 13  1  0  0  0  0
 13 14  1  0  0  0  0
 15 14  1  0  0  0  0
 15  5  1  0  0  0  0
 16 15  1  0  0  0  0
  2 16  1  0  0  0  0
 16 17  1  0  0  0  0
 17 18  1  0  0  0  0
 19 18  1  0  0  0  0
  2 19  1  0  0  0  0
 19 20  1  6  0  0  0
  1 21  1  0  0  0  0
  1 22  1  0  0  0  0
  1 23  1  0  0  0  0
  3 24  1  0  0  0  0
  4 25  1  0  0  0  0
  7 26  1  0  0  0  0
  7 27  1  0  0  0  0
  8 28  1  0  0  0  0
  8 29  1  0  0  0  0
 11 30  1  0  0  0  0
 13 31  1  0  0  0  0
 13 32  1  0  0  0  0
 14 33  1  0  0  0  0
 14 34  1  0  0  0  0
 15 35  1  6  0  0  0
 16 36  1  1  0  0  0
 17 37  1  0  0  0  0
 17 38  1  0  0  0  0
 18 39  1  0  0  0  0
 18 40  1  0  0  0  0
 19 41  1  1  0  0  0
 20 42  1  0  0  0  0
M  END
$$$$
51
  Mrv2314 01052423262D          

 52 55  0  0  1  0            999 V2000
    4.5466   -0.5086    0.0000 C   0  0  0  0  0  0  0  0  0  0  0  0
    4.8269    0.2673    0.0000 C   0  0  2  0  0  0  0  0  0  0  0  0
    5.3587   -0.3634    0.0000 C   0  0  0  0  0  0  0  0  0  0  0  0
    6.1708   -0.2182    0.0000 C   0  0  0  0  0  0  0  0  0  0  0  0
    6.4511    0.5577    0.0000 C   0  0  0  0  0  0  0  0  0  0  0  0
    7.2632    0.7029    0.0000 O   0  0  0  0  0  0  0  0  0  0  0  0
    5.9193    1.1884    0.0000 C   0  0  0  0  0  0  0  0  0  0  0  0
    5.1072    1.0432    0.0000 C   0  0  0  0  0  0  0  0  0  0  0  0
    4.5754    1.6739    0.0000 C   0  0  0  0  0  0  0  0  0  0  0  0
    3.7633    1.5287    0.0000 C   0  0  0  0  0  0  0  0  0  0  0  0
    3.4830    0.7528    0.0000 C   0  0  2  0  0  0  0  0  0  0  0  0
    4.0148    0.1221    0.0000 C   0  0  2  0  0  0  0  0  0  0  0  0
    3.7345   -0.6539    0.0000 C   0  0  0  0  0  0  0  0  0  0  0  0
    2.9224   -0.7991    0.0000 C   0  0  0  0  0  0  0  0  0  0  0  0
    2.3905   -0.1684    0.0000 C   0  0  1  0  0  0  0  0  0  0  0  0
    2.6708    0.6076    0.0000 C   0  0  1  0  0  0  0  0  0  0  0  0
    2.0195    1.1139    0.0000 C   0  0  0  0  0  0  0  0  0  0  0  0
    1.3367    0.6509    0.0000 C   0  0  0  0  0  0  0  0  0  0  0  0
    1.5660   -0.1416    0.0000 C   0  0  1  0  0  0  0  0  0  0  0  0
    0.8051   -0.4604    0.0000 C   0  0  0  0  0  0  0  0  0  0  0  0
    1.4446   -0.9576    0.0000 O   0  0  0  0  0  0  0  0  0  0  0  0
    2.0307   -0.9107    0.0000 C   0  0  0  0  0  0  0  0  0  0  0  0
    4.0750   -1.1856    0.0000 H   0  0  0  0  0  0  0  0  0  0  0  0
    4.6918   -1.3208    0.0000 H   0  0  0  0  0  0  0  0  0  0  0  0
    5.2235   -0.9802    0.0000 H   0  0  0  0  0  0  0  0  0  0  0  0
    5.6390    0.4125    0.0000 H   0  0  0  0  0  0  0  0  0  0  0  0
    5.9306   -0.9580    0.0000 H   0  0  0  0  0  0  0  0  0  0  0  0
    6.7163   -0.8372    0.0000 H   0  0  0  0  0  0  0  0  0  0  0  0
    6.9813   -0.0641    0.0000 H   0  0  0  0  0  0  0  0  0  0  0  0
    6.1996    1.9643    0.0000 H   0  0  0  0  0  0  0  0  0  0  0  0
    5.1741    2.2415    0.0000 H   0  0  0  0  0  0  0  0  0  0  0  0
    4.4776    2.4931    0.0000 H   0  0  0  0  0  0  0  0  0  0  0  0
    3.5711    2.3310    0.0000 H   0  0  0  0  0  0  0  0  0  0  0  0
    3.0049    1.8536    0.0000 H   0  0  0  0  0  0  0  0  0  0  0  0
    3.2027   -0.0231    0.0000 H   0  0  0  0  0  0  0  0  0  0  0  0
    4.2951    0.8980    0.0000 H   0  0  0  0  0  0  0  0  0  0  0  0
    3.1786   -1.2634    0.0000 H   0  0  0  0  0  0  0  0  0  0  0  0
    3.6645   -1.4759    0.0000 H   0  0  0  0  0  0  0  0  0  0  0  0
    2.3328   -1.3762    0.0000 H   0  0  0  0  0  0  0  0  0  0  0  0
    2.8024   -1.6153    0.0000 H   0  0  0  0  0  0  0  0  0  0  0  0
    2.8685    1.4085    0.0000 H   0  0  0  0  0  0  0  0  0  0  0  0
    1.9480    1.9358    0.0000 H   0  0  0  0  0  0  0  0  0  0  0  0
    1.4035    1.6627    0.0000 H   0  0  0  0  0  0  0  0  0  0  0  0
    0.7832    1.2627    0.0000 H   0  0  0  0  0  0  0  0  0  0  0  0
    0.5200    0.5342    0.0000 H   0  0  0  0  0  0  0  0  0  0  0  0
    0.6961    0.3573    0.0000 H   0  0  0  0  0  0  0  0  0  0  0  0
   -0.0127   -0.3519    0.0000 H   0  0  0  0  0  0  0  0  0  0  0  0
    0.4866   -1.2215    0.0000 H   0  0  0  0  0  0  0  0  0  0  0  0
    1.2082   -1.7480    0.0000 H   0  0  0  0  0  0  0  0  0  0  0  0
    1.3481   -1.3741    0.0000 H   0  0  0  0  0  0  0  0  0  0  0  0
    1.6662   -1.6508    0.0000 H   0  0  0  0  0  0  0  0  0  0  0  0
    2.0794   -1.7343    0.0000 H   0  0  0  0  0  0  0  0  0  0  0  0
  2  1  1  1  0  0  0
  2  3  1  0  0  0  0
  3  4  1  0  0  0  0
  4  5  1  0  0  0  0
  5  6  2  0  0  0  0
  5  7  1  0  0  0  0
  7  8  2  0  0  0  0
  2  8  1  0  0  0  0
  8  9  1  0  0  0  0
  9 10  1  0  0  0  0
 11 10  1  0  0  0  0
 11 12  1  0  0  0  0
 12  2  1  0  0  0  0
 12 13  1  0  0  0  0
 13 14  1  0  0  0  0
 15 14  1  0  0  0  0
 16 15  1  0  0  0  0
 11 16  1  0  0  0  0
 16 17  1  0  0  0  0
 17 18  1  0  0  0  0
 19 18  1  0  0  0  0
 15 19  1  0  0  0  0
 19 20  1  6  0  0  0
 19 21  1  1  0  0  0
 15 22  1  1  0  0  0
  1 23  1  0  0  0  0
  1 24  1  0  0  0  0
  1 25  1  0  0  0  0
  3 26  1  0  0  0  0
  3 27  1  0  0  0  0
  4 28  1  0  0  0  0
  4 29  1  0  0  0  0
  7 30  1  0  0  0  0
  9 31  1  0  0  0  0
  9 32  1  0  0  0  0
 10 33  1  0  0  0  0
 10 34  1  0  0  0  0
 11 35  1  1  0  0  0
 12 36  1  6  0  0  0
 13 37  1  0  0  0  0
 13 38  1  0  0  0  0
 14 39  1  0  0  0  0
 14 40  1  0  0  0  0
 16 41  1  6  0  0  0
 17 42  1  0  0  0  0
 17 43  1  0  0  0  0
 18 44  1  0  0  0  0
 18 45  1  0  0  0  0
 20 46  1  0  0  0  0
 20 47  1  0  0  0  0
 20 48  1  0  0  0  0
 21 49  1  0  0  0  0
 22 50  1  0  0  0  0
 22 51  1  0  0  0  0
 22 52  1  0  0  0  0
M  END
$$$$
52
  Mrv2314 01052423262D          

 16 16  0  0  0  0            999 V2000
    0.7145    1.2375    0.0000 C   0  0  0  0  0  0  0  0  0  0  0  0
    1.4289    0.8250    0.0000 C   0  0  0  0  0  0  0  0  0  0  0  0
    1.4289   -0.0000    0.0000 C   0  0  0  0  0  0  0  0  0  0  0  0
    0.7145   -0.4125    0.0000 C   0  0  0  0  0  0  0  0  0  0  0  0
    0.0000    0.0000    0.0000 C   0  0  0  0  0  0  0  0  0  0  0  0
    0.0000    0.8250    0.0000 C   0  0  0  0  0  0  0  0  0  0  0  0
   -0.7145    1.2375    0.0000 Cl  0  0  0  0  0  0  0  0  0  0  0  0
   -0.7145   -0.4125    0.0000 N   0  0  0  0  0  0  0  0  0  0  0  0
    0.7145   -1.2375    0.0000 Cl  0  0  0  0  0  0  0  0  0  0  0  0
    2.1434    1.2375    0.0000 N   0  3  0  0  0  0  0  0  0  0  0  0
    2.1434    2.0625    0.0000 O   0  0  0  0  0  0  0  0  0  0  0  0
    2.8579    0.8250    0.0000 O   0  5  0  0  0  0  0  0  0  0  0  0
    0.7145    2.0625    0.0000 H   0  0  0  0  0  0  0  0  0  0  0  0
    2.1434   -0.4125    0.0000 H   0  0  0  0  0  0  0  0  0  0  0  0
   -1.4289    0.0000    0.0000 H   0  0  0  0  0  0  0  0  0  0  0  0
   -0.7145   -1.2375    0.0000 H   0  0  0  0  0  0  0  0  0  0  0  0
  1  2  4  0  0  0  0
  2  3  4  0  0  0  0
  3  4  4  0  0  0  0
  4  5  4  0  0  0  0
  5  6  4  0  0  0  0
  1  6  4  0  0  0  0
  6  7  1  0  0  0  0
  5  8  1  0  0  0  0
  4  9  1  0  0  0  0
  2 10  1  0  0  0  0
 10 11  2  0  0  0  0
 10 12  1  0  0  0  0
  1 13  1  0  0  0  0
  3 14  1  0  0  0  0
  8 15  1  0  0  0  0
  8 16  1  0  0  0  0
M  CHG  2  10   1  12  -1
M  END
$$$$
53
  Mrv2314 01052423262D          

 31 33  0  0  0  0            999 V2000
   -0.7145   -3.7125    0.0000 C   0  0  0  0  0  0  0  0  0  0  0  0
   -0.7145   -2.8875    0.0000 C   0  0  0  0  0  0  0  0  0  0  0  0
    0.0000   -2.4750    0.0000 C   0  0  0  0  0  0  0  0  0  0  0  0
    0.7145   -2.8875    0.0000 C   0  0  0  0  0  0  0  0  0  0  0  0
    0.7145   -3.7125    0.0000 C   0  0  0  0  0  0  0  0  0  0  0  0
    0.0000   -4.1250    0.0000 C   0  0  0  0  0  0  0  0  0  0  0  0
    1.4289   -2.4750    0.0000 C   0  0  0  0  0  0  0  0  0  0  0  0
    1.4289   -1.6500    0.0000 N   0  3  0  0  0  0  0  0  0  0  0  0
    0.7145   -1.2375    0.0000 C   0  0  0  0  0  0  0  0  0  0  0  0
    0.7145   -0.4125    0.0000 C   0  0  0  0  0  0  0  0  0  0  0  0
    1.4289    0.0000    0.0000 C   0  0  0  0  0  0  0  0  0  0  0  0
    2.1434   -0.4125    0.0000 C   0  0  0  0  0  0  0  0  0  0  0  0
    2.8579    0.0000    0.0000 C   0  0  0  0  0  0  0  0  0  0  0  0
    3.5724   -0.4125    0.0000 C   0  0  0  0  0  0  0  0  0  0  0  0
    3.5724   -1.2375    0.0000 C   0  0  0  0  0  0  0  0  0  0  0  0
    2.8579   -1.6500    0.0000 C   0  0  0  0  0  0  0  0  0  0  0  0
    2.1434   -1.2375    0.0000 C   0  0  0  0  0  0  0  0  0  0  0  0
   -1.4289   -4.1250    0.0000 H   0  0  0  0  0  0  0  0  0  0  0  0
   -1.4289   -2.4750    0.0000 H   0  0  0  0  0  0  0  0  0  0  0  0
    0.0000   -1.6500    0.0000 H   0  0  0  0  0  0  0  0  0  0  0  0
    1.4289   -4.1250    0.0000 H   0  0  0  0  0  0  0  0  0  0  0  0
    0.0000   -4.9500    0.0000 H   0  0  0  0  0  0  0  0  0  0  0  0
    1.8823   -3.1643    0.0000 H   0  0  0  0  0  0  0  0  0  0  0  0
    2.2525   -2.5230    0.0000 H   0  0  0  0  0  0  0  0  0  0  0  0
    0.7145   -2.0625    0.0000 H   0  0  0  0  0  0  0  0  0  0  0  0
    0.0000    0.0000    0.0000 H   0  0  0  0  0  0  0  0  0  0  0  0
    1.4289    0.8250    0.0000 H   0  0  0  0  0  0  0  0  0  0  0  0
    2.8579    0.8250    0.0000 H   0  0  0  0  0  0  0  0  0  0  0  0
    4.2868   -0.0000    0.0000 H   0  0  0  0  0  0  0  0  0  0  0  0
    4.2868   -1.6500    0.0000 H   0  0  0  0  0  0  0  0  0  0  0  0
    2.8579   -2.4750    0.0000 H   0  0  0  0  0  0  0  0  0  0  0  0
  1  2  4  0  0  0  0
  2  3  4  0  0  0  0
  3  4  4  0  0  0  0
  4  5  4  0  0  0  0
  5  6  4  0  0  0  0
  1  6  4  0  0  0  0
  4  7  1  0  0  0  0
  7  8  1  0  0  0  0
  8  9  4  0  0  0  0
  9 10  4  0  0  0  0
 10 11  4  0  0  0  0
 11 12  4  0  0  0  0
 12 13  4  0  0  0  0
 13 14  4  0  0  0  0
 14 15  4  0  0  0  0
 15 16  4  0  0  0  0
 16 17  4  0  0  0  0
 12 17  4  0  0  0  0
  8 17  4  0  0  0  0
  1 18  1  0  0  0  0
  2 19  1  0  0  0  0
  3 20  1  0  0  0  0
  5 21  1  0  0  0  0
  6 22  1  0  0  0  0
  7 23  1  0  0  0  0
  7 24  1  0  0  0  0
  9 25  1  0  0  0  0
 10 26  1  0  0  0  0
 11 27  1  0  0  0  0
 13 28  1  0  0  0  0
 14 29  1  0  0  0  0
 15 30  1  0  0  0  0
 16 31  1  0  0  0  0
M  CHG  1   8   1
M  END
$$$$
54
  Mrv2314 01052423262D          

 49 49  0  0  0  0            999 V2000
    5.6346   -6.2328    0.0000 C   0  0  0  0  0  0  0  0  0  0  0  0
    6.3491   -5.8203    0.0000 C   0  0  0  0  0  0  0  0  0  0  0  0
    7.0636   -6.2328    0.0000 C   0  0  0  0  0  0  0  0  0  0  0  0
    7.7781   -5.8203    0.0000 C   0  0  0  0  0  0  0  0  0  0  0  0
    8.4925   -6.2328    0.0000 C   0  0  0  0  0  0  0  0  0  0  0  0
    9.2070   -5.8203    0.0000 C   0  0  0  0  0  0  0  0  0  0  0  0
    9.9215   -6.2328    0.0000 C   0  0  0  0  0  0  0  0  0  0  0  0
   10.6359   -5.8203    0.0000 C   0  0  0  0  0  0  0  0  0  0  0  0
   11.3504   -6.2328    0.0000 C   0  0  0  0  0  0  0  0  0  0  0  0
   12.0649   -5.8203    0.0000 C   0  0  0  0  0  0  0  0  0  0  0  0
   12.7794   -6.2328    0.0000 C   0  0  0  0  0  0  0  0  0  0  0  0
   13.4938   -5.8203    0.0000 C   0  0  0  0  0  0  0  0  0  0  0  0
   14.2083   -6.2328    0.0000 N   0  0  0  0  0  0  0  0  0  0  0  0
   14.9620   -5.8972    0.0000 C   0  0  0  0  0  0  0  0  0  0  0  0
   15.5140   -6.5103    0.0000 C   0  0  0  0  0  0  0  0  0  0  0  0
   15.1015   -7.2248    0.0000 C   0  0  0  0  0  0  0  0  0  0  0  0
   14.2945   -7.0533    0.0000 C   0  0  0  0  0  0  0  0  0  0  0  0
   13.6814   -7.6053    0.0000 O   0  0  0  0  0  0  0  0  0  0  0  0
    5.2221   -5.5183    0.0000 H   0  0  0  0  0  0  0  0  0  0  0  0
    4.9202   -6.6453    0.0000 H   0  0  0  0  0  0  0  0  0  0  0  0
    6.0471   -6.9473    0.0000 H   0  0  0  0  0  0  0  0  0  0  0  0
    6.7194   -5.0831    0.0000 H   0  0  0  0  0  0  0  0  0  0  0  0
    5.9789   -5.0831    0.0000 H   0  0  0  0  0  0  0  0  0  0  0  0
    6.6933   -6.9701    0.0000 H   0  0  0  0  0  0  0  0  0  0  0  0
    7.4338   -6.9701    0.0000 H   0  0  0  0  0  0  0  0  0  0  0  0
    8.1483   -5.0831    0.0000 H   0  0  0  0  0  0  0  0  0  0  0  0
    7.4078   -5.0831    0.0000 H   0  0  0  0  0  0  0  0  0  0  0  0
    8.1223   -6.9701    0.0000 H   0  0  0  0  0  0  0  0  0  0  0  0
    8.8628   -6.9701    0.0000 H   0  0  0  0  0  0  0  0  0  0  0  0
    9.5773   -5.0831    0.0000 H   0  0  0  0  0  0  0  0  0  0  0  0
    8.8367   -5.0831    0.0000 H   0  0  0  0  0  0  0  0  0  0  0  0
    9.5512   -6.9701    0.0000 H   0  0  0  0  0  0  0  0  0  0  0  0
   10.2917   -6.9701    0.0000 H   0  0  0  0  0  0  0  0  0  0  0  0
   11.0062   -5.0831    0.0000 H   0  0  0  0  0  0  0  0  0  0  0  0
   10.2657   -5.0831    0.0000 H   0  0  0  0  0  0  0  0  0  0  0  0
   10.9802   -6.9701    0.0000 H   0  0  0  0  0  0  0  0  0  0  0  0
   11.7207   -6.9701    0.0000 H   0  0  0  0  0  0  0  0  0  0  0  0
   12.4351   -5.0831    0.0000 H   0  0  0  0  0  0  0  0  0  0  0  0
   11.6946   -5.0831    0.0000 H   0  0  0  0  0  0  0  0  0  0  0  0
   12.4091   -6.9701    0.0000 H   0  0  0  0  0  0  0  0  0  0  0  0
   13.1496   -6.9701    0.0000 H   0  0  0  0  0  0  0  0  0  0  0  0
   13.8641   -5.0831    0.0000 H   0  0  0  0  0  0  0  0  0  0  0  0
   13.1236   -5.0831    0.0000 H   0  0  0  0  0  0  0  0  0  0  0  0
   15.4923   -5.2653    0.0000 H   0  0  0  0  0  0  0  0  0  0  0  0
   14.7346   -5.1042    0.0000 H   0  0  0  0  0  0  0  0  0  0  0  0
   16.2789   -6.8194    0.0000 H   0  0  0  0  0  0  0  0  0  0  0  0
   16.1980   -6.0490    0.0000 H   0  0  0  0  0  0  0  0  0  0  0  0
   15.0440   -8.0478    0.0000 H   0  0  0  0  0  0  0  0  0  0  0  0
   15.7516   -7.7327    0.0000 H   0  0  0  0  0  0  0  0  0  0  0  0
  1  2  1  0  0  0  0
  2  3  1  0  0  0  0
  3  4  1  0  0  0  0
  4  5  1  0  0  0  0
  5  6  1  0  0  0  0
  6  7  1  0  0  0  0
  7  8  1  0  0  0  0
  8  9  1  0  0  0  0
  9 10  1  0  0  0  0
 10 11  1  0  0  0  0
 11 12  1  0  0  0  0
 12 13  1  0  0  0  0
 13 14  1  0  0  0  0
 14 15  1  0  0  0  0
 15 16  1  0  0  0  0
 16 17  1  0  0  0  0
 13 17  1  0  0  0  0
 17 18  2  0  0  0  0
  1 19  1  0  0  0  0
  1 20  1  0  0  0  0
  1 21  1  0  0  0  0
  2 22  1  0  0  0  0
  2 23  1  0  0  0  0
  3 24  1  0  0  0  0
  3 25  1  0  0  0  0
  4 26  1  0  0  0  0
  4 27  1  0  0  0  0
  5 28  1  0  0  0  0
  5 29  1  0  0  0  0
  6 30  1  0  0  0  0
  6 31  1  0  0  0  0
  7 32  1  0  0  0  0
  7 33  1  0  0  0  0
  8 34  1  0  0  0  0
  8 35  1  0  0  0  0
  9 36  1  0  0  0  0
  9 37  1  0  0  0  0
 10 38  1  0  0  0  0
 10 39  1  0  0  0  0
 11 40  1  0  0  0  0
 11 41  1  0  0  0  0
 12 42  1  0  0  0  0
 12 43  1  0  0  0  0
 14 44  1  0  0  0  0
 14 45  1  0  0  0  0
 15 46  1  0  0  0  0
 15 47  1  0  0  0  0
 16 48  1  0  0  0  0
 16 49  1  0  0  0  0
M  END
$$$$
55
  Mrv2314 01052423262D          

 38 40  0  0  0  0            999 V2000
    0.7145   -0.4125    0.0000 C   0  0  0  0  0  0  0  0  0  0  0  0
    0.7145   -1.2375    0.0000 N   0  0  0  0  0  0  0  0  0  0  0  0
    1.4289   -1.6500    0.0000 C   0  0  0  0  0  0  0  0  0  0  0  0
    1.4289   -2.4750    0.0000 C   0  0  0  0  0  0  0  0  0  0  0  0
    0.7145   -2.8875    0.0000 C   0  0  0  0  0  0  0  0  0  0  0  0
    0.7145   -3.7125    0.0000 O   0  0  0  0  0  0  0  0  0  0  0  0
    0.0000   -2.4750    0.0000 C   0  0  0  0  0  0  0  0  0  0  0  0
    0.0000   -1.6500    0.0000 C   0  0  0  0  0  0  0  0  0  0  0  0
   -0.7145   -2.8875    0.0000 C   0  0  0  0  0  0  0  0  0  0  0  0
   -0.7145   -3.7125    0.0000 C   0  0  0  0  0  0  0  0  0  0  0  0
   -1.4289   -4.1250    0.0000 C   0  0  0  0  0  0  0  0  0  0  0  0
   -2.1434   -3.7125    0.0000 C   0  0  0  0  0  0  0  0  0  0  0  0
   -2.1434   -2.8875    0.0000 C   0  0  0  0  0  0  0  0  0  0  0  0
   -1.4289   -2.4750    0.0000 C   0  0  0  0  0  0  0  0  0  0  0  0
   -1.4289   -4.9500    0.0000 C   0  0  0  0  0  0  0  0  0  0  0  0
   -1.4289   -5.7750    0.0000 F   0  0  0  0  0  0  0  0  0  0  0  0
   -0.6039   -4.9500    0.0000 F   0  0  0  0  0  0  0  0  0  0  0  0
   -2.2539   -4.9500    0.0000 F   0  0  0  0  0  0  0  0  0  0  0  0
    2.1434   -2.8875    0.0000 C   0  0  0  0  0  0  0  0  0  0  0  0
    2.8579   -2.4750    0.0000 C   0  0  0  0  0  0  0  0  0  0  0  0
    3.5724   -2.8875    0.0000 C   0  0  0  0  0  0  0  0  0  0  0  0
    3.5724   -3.7125    0.0000 C   0  0  0  0  0  0  0  0  0  0  0  0
    2.8579   -4.1250    0.0000 C   0  0  0  0  0  0  0  0  0  0  0  0
    2.1434   -3.7125    0.0000 C   0  0  0  0  0  0  0  0  0  0  0  0
    1.5395   -0.4125    0.0000 H   0  0  0  0  0  0  0  0  0  0  0  0
    0.7145    0.4125    0.0000 H   0  0  0  0  0  0  0  0  0  0  0  0
   -0.1105   -0.4125    0.0000 H   0  0  0  0  0  0  0  0  0  0  0  0
    2.1434   -1.2375    0.0000 H   0  0  0  0  0  0  0  0  0  0  0  0
   -0.7145   -1.2375    0.0000 H   0  0  0  0  0  0  0  0  0  0  0  0
    0.0000   -4.1250    0.0000 H   0  0  0  0  0  0  0  0  0  0  0  0
   -2.8579   -4.1250    0.0000 H   0  0  0  0  0  0  0  0  0  0  0  0
   -2.8579   -2.4750    0.0000 H   0  0  0  0  0  0  0  0  0  0  0  0
   -1.4289   -1.6500    0.0000 H   0  0  0  0  0  0  0  0  0  0  0  0
    2.8579   -1.6500    0.0000 H   0  0  0  0  0  0  0  0  0  0  0  0
    4.2868   -2.4750    0.0000 H   0  0  0  0  0  0  0  0  0  0  0  0
    4.2868   -4.1250    0.0000 H   0  0  0  0  0  0  0  0  0  0  0  0
    2.8579   -4.9500    0.0000 H   0  0  0  0  0  0  0  0  0  0  0  0
    1.4289   -4.1250    0.0000 H   0  0  0  0  0  0  0  0  0  0  0  0
  1  2  1  0  0  0  0
  2  3  1  0  0  0  0
  3  4  2  0  0  0  0
  4  5  1  0  0  0  0
  5  6  2  0  0  0  0
  5  7  1  0  0  0  0
  7  8  2  0  0  0  0
  2  8  1  0  0  0  0
  7  9  1  0  0  0  0
  9 10  4  0  0  0  0
 10 11  4  0  0  0  0
 11 12  4  0  0  0  0
 12 13  4  0  0  0  0
 13 14  4  0  0  0  0
  9 14  4  0  0  0  0
 11 15  1  0  0  0  0
 15 16  1  0  0  0  0
 15 17  1  0  0  0  0
 15 18  1  0  0  0  0
  4 19  1  0  0  0  0
 19 20  4  0  0  0  0
 20 21  4  0  0  0  0
 21 22  4  0  0  0  0
 22 23  4  0  0  0  0
 23 24  4  0  0  0  0
 19 24  4  0  0  0  0
  1 25  1  0  0  0  0
  1 26  1  0  0  0  0
  1 27  1  0  0  0  0
  3 28  1  0  0  0  0
  8 29  1  0  0  0  0
 10 30  1  0  0  0  0
 12 31  1  0  0  0  0
 13 32  1  0  0  0  0
 14 33  1  0  0  0  0
 20 34  1  0  0  0  0
 21 35  1  0  0  0  0
 22 36  1  0  0  0  0
 23 37  1  0  0  0  0
 24 38  1  0  0  0  0
M  END
$$$$
56
  Mrv2314 01052423262D          

 15 15  0  0  0  0            999 V2000
    0.7145    2.0625    0.0000 C   0  0  0  0  0  0  0  0  0  0  0  0
    0.7145    1.2375    0.0000 C   0  0  0  0  0  0  0  0  0  0  0  0
    1.4289    0.8250    0.0000 C   0  0  0  0  0  0  0  0  0  0  0  0
    1.4289   -0.0000    0.0000 C   0  0  0  0  0  0  0  0  0  0  0  0
    0.7145   -0.4125    0.0000 C   0  0  0  0  0  0  0  0  0  0  0  0
    0.0000    0.0000    0.0000 C   0  0  0  0  0  0  0  0  0  0  0  0
    0.0000    0.8250    0.0000 C   0  0  0  0  0  0  0  0  0  0  0  0
    1.5395    2.0625    0.0000 H   0  0  0  0  0  0  0  0  0  0  0  0
    0.7145    2.8875    0.0000 H   0  0  0  0  0  0  0  0  0  0  0  0
   -0.1105    2.0625    0.0000 H   0  0  0  0  0  0  0  0  0  0  0  0
    2.1434    1.2375    0.0000 H   0  0  0  0  0  0  0  0  0  0  0  0
    2.1434   -0.4125    0.0000 H   0  0  0  0  0  0  0  0  0  0  0  0
    0.7145   -1.2375    0.0000 H   0  0  0  0  0  0  0  0  0  0  0  0
   -0.7145   -0.4125    0.0000 H   0  0  0  0  0  0  0  0  0  0  0  0
   -0.7145    1.2375    0.0000 H   0  0  0  0  0  0  0  0  0  0  0  0
  1  2  1  0  0  0  0
  2  3  4  0  0  0  0
  3  4  4  0  0  0  0
  4  5  4  0  0  0  0
  5  6  4  0  0  0  0
  6  7  4  0  0  0  0
  2  7  4  0  0  0  0
  1  8  1  0  0  0  0
  1  9  1  0  0  0  0
  1 10  1  0  0  0  0
  3 11  1  0  0  0  0
  4 12  1  0  0  0  0
  5 13  1  0  0  0  0
  6 14  1  0  0  0  0
  7 15  1  0  0  0  0
M  END
$$$$
57
  Mrv2314 01052423262D          

 26 27  0  0  0  0            999 V2000
    0.0000   -4.1250    0.0000 C   0  0  0  0  0  0  0  0  0  0  0  0
    0.7145   -3.7125    0.0000 N   0  0  0  0  0  0  0  0  0  0  0  0
    0.7145   -2.8875    0.0000 C   0  0  0  0  0  0  0  0  0  0  0  0
    0.0000   -2.4750    0.0000 O   0  0  0  0  0  0  0  0  0  0  0  0
    1.4289   -2.4750    0.0000 O   0  0  0  0  0  0  0  0  0  0  0  0
    1.4289   -1.6500    0.0000 C   0  0  0  0  0  0  0  0  0  0  0  0
    0.7145   -1.2375    0.0000 C   0  0  0  0  0  0  0  0  0  0  0  0
    0.7145   -0.4125    0.0000 C   0  0  0  0  0  0  0  0  0  0  0  0
    1.4289    0.0000    0.0000 C   0  0  0  0  0  0  0  0  0  0  0  0
    2.1434   -0.4125    0.0000 C   0  0  0  0  0  0  0  0  0  0  0  0
    2.8579    0.0000    0.0000 C   0  0  0  0  0  0  0  0  0  0  0  0
    3.5724   -0.4125    0.0000 C   0  0  0  0  0  0  0  0  0  0  0  0
    3.5724   -1.2375    0.0000 C   0  0  0  0  0  0  0  0  0  0  0  0
    2.8579   -1.6500    0.0000 C   0  0  0  0  0  0  0  0  0  0  0  0
    2.1434   -1.2375    0.0000 C   0  0  0  0  0  0  0  0  0  0  0  0
   -0.4125   -3.4105    0.0000 H   0  0  0  0  0  0  0  0  0  0  0  0
   -0.7145   -4.5375    0.0000 H   0  0  0  0  0  0  0  0  0  0  0  0
    0.4125   -4.8395    0.0000 H   0  0  0  0  0  0  0  0  0  0  0  0
    1.4289   -4.1250    0.0000 H   0  0  0  0  0  0  0  0  0  0  0  0
    0.0000   -1.6500    0.0000 H   0  0  0  0  0  0  0  0  0  0  0  0
    0.0000    0.0000    0.0000 H   0  0  0  0  0  0  0  0  0  0  0  0
    1.4289    0.8250    0.0000 H   0  0  0  0  0  0  0  0  0  0  0  0
    2.8579    0.8250    0.0000 H   0  0  0  0  0  0  0  0  0  0  0  0
    4.2868   -0.0000    0.0000 H   0  0  0  0  0  0  0  0  0  0  0  0
    4.2868   -1.6500    0.0000 H   0  0  0  0  0  0  0  0  0  0  0  0
    2.8579   -2.4750    0.0000 H   0  0  0  0  0  0  0  0  0  0  0  0
  1  2  1  0  0  0  0
  2  3  1  0  0  0  0
  3  4  2  0  0  0  0
  3  5  1  0  0  0  0
  5  6  1  0  0  0  0
  6  7  4  0  0  0  0
  7  8  4  0  0  0  0
  8  9  4  0  0  0  0
  9 10  4  0  0  0  0
 10 11  4  0  0  0  0
 11 12  4  0  0  0  0
 12 13  4  0  0  0  0
 13 14  4  0  0  0  0
 14 15  4  0  0  0  0
 10 15  4  0  0  0  0
  6 15  4  0  0  0  0
  1 16  1  0  0  0  0
  1 17  1  0  0  0  0
  1 18  1  0  0  0  0
  2 19  1  0  0  0  0
  7 20  1  0  0  0  0
  8 21  1  0  0  0  0
  9 22  1  0  0  0  0
 11 23  1  0  0  0  0
 12 24  1  0  0  0  0
 13 25  1  0  0  0  0
 14 26  1  0  0  0  0
M  END
$$$$
58
  Mrv2314 01052423262D          

 19 20  0  0  0  0            999 V2000
   -0.7145   -0.4125    0.0000 C   0  0  0  0  0  0  0  0  0  0  0  0
   -0.7145   -1.2375    0.0000 C   0  0  0  0  0  0  0  0  0  0  0  0
    0.0000   -1.6500    0.0000 C   0  0  0  0  0  0  0  0  0  0  0  0
    0.7145   -1.2375    0.0000 C   0  0  0  0  0  0  0  0  0  0  0  0
    0.7145   -0.4125    0.0000 C   0  0  0  0  0  0  0  0  0  0  0  0
    0.0000   -0.0000    0.0000 C   0  0  0  0  0  0  0  0  0  0  0  0
    1.4289   -0.0000    0.0000 C   0  0  0  0  0  0  0  0  0  0  0  0
    2.1434   -0.4125    0.0000 C   0  0  0  0  0  0  0  0  0  0  0  0
    2.1434   -1.2375    0.0000 C   0  0  0  0  0  0  0  0  0  0  0  0
    1.4289   -1.6500    0.0000 C   0  0  0  0  0  0  0  0  0  0  0  0
    1.4289   -2.4750    0.0000 O   0  0  0  0  0  0  0  0  0  0  0  0
   -1.4289    0.0000    0.0000 H   0  0  0  0  0  0  0  0  0  0  0  0
   -1.4289   -1.6500    0.0000 H   0  0  0  0  0  0  0  0  0  0  0  0
    0.0000   -2.4750    0.0000 H   0  0  0  0  0  0  0  0  0  0  0  0
    0.0000    0.8250    0.0000 H   0  0  0  0  0  0  0  0  0  0  0  0
    1.4289    0.8250    0.0000 H   0  0  0  0  0  0  0  0  0  0  0  0
    2.8579   -0.0000    0.0000 H   0  0  0  0  0  0  0  0  0  0  0  0
    2.8579   -1.6500    0.0000 H   0  0  0  0  0  0  0  0  0  0  0  0
    0.7145   -2.8875    0.0000 H   0  0  0  0  0  0  0  0  0  0  0  0
  1  2  4  0  0  0  0
  2  3  4  0  0  0  0
  3  4  4  0  0  0  0
  4  5  4  0  0  0  0
  5  6  4  0  0  0  0
  1  6  4  0  0  0  0
  5  7  4  0  0  0  0
  7  8  4  0  0  0  0
  8  9  4  0  0  0  0
  9 10  4  0  0  0  0
  4 10  4  0  0  0  0
 10 11  1  0  0  0  0
  1 12  1  0  0  0  0
  2 13  1  0  0  0  0
  3 14  1  0  0  0  0
  6 15  1  0  0  0  0
  7 16  1  0  0  0  0
  8 17  1  0  0  0  0
  9 18  1  0  0  0  0
 11 19  1  0  0  0  0
M  END
$$$$
59
  Mrv2314 01052423262D          

 45 47  0  0  0  0            999 V2000
   -1.8659    1.4455    0.0000 C   0  0  0  0  0  0  0  0  0  0  0  0
   -1.4534    0.7310    0.0000 C   0  0  0  0  0  0  0  0  0  0  0  0
   -0.6284    0.7310    0.0000 C   0  0  0  0  0  0  0  0  0  0  0  0
   -1.8659    0.0165    0.0000 C   0  0  0  0  0  0  0  0  0  0  0  0
   -1.4534   -0.6979    0.0000 C   0  0  0  0  0  0  0  0  0  0  0  0
   -1.8659   -1.4124    0.0000 C   0  0  0  0  0  0  0  0  0  0  0  0
   -2.6909   -1.4124    0.0000 C   0  0  0  0  0  0  0  0  0  0  0  0
   -3.1034   -0.6979    0.0000 C   0  0  0  0  0  0  0  0  0  0  0  0
   -2.6909    0.0165    0.0000 C   0  0  0  0  0  0  0  0  0  0  0  0
   -1.4534   -2.1269    0.0000 C   0  0  0  0  0  0  0  0  0  0  0  0
   -1.8659   -2.8414    0.0000 C   0  0  0  0  0  0  0  0  0  0  0  0
   -0.6284   -2.1269    0.0000 C   0  0  0  0  0  0  0  0  0  0  0  0
   -0.6284   -0.6979    0.0000 N   0  0  0  0  0  0  0  0  0  0  0  0
   -0.1435   -1.3654    0.0000 C   0  0  0  0  0  0  0  0  0  0  0  0
   -0.1435   -2.1904    0.0000 O   0  0  0  0  0  0  0  0  0  0  0  0
    0.6411   -1.1104    0.0000 C   0  0  0  0  0  0  0  0  0  0  0  0
    0.6411   -0.2854    0.0000 C   0  0  0  0  0  0  0  0  0  0  0  0
   -0.1435   -0.0305    0.0000 C   0  0  0  0  0  0  0  0  0  0  0  0
   -0.1435    0.7945    0.0000 O   0  0  0  0  0  0  0  0  0  0  0  0
    1.3556    0.1271    0.0000 C   0  0  0  0  0  0  0  0  0  0  0  0
    2.0701   -0.2854    0.0000 C   0  0  0  0  0  0  0  0  0  0  0  0
    2.0701   -1.1104    0.0000 C   0  0  0  0  0  0  0  0  0  0  0  0
    1.3556   -1.5229    0.0000 C   0  0  0  0  0  0  0  0  0  0  0  0
    2.7845    0.1271    0.0000 O   0  0  0  0  0  0  0  0  0  0  0  0
   -1.1515    1.8580    0.0000 H   0  0  0  0  0  0  0  0  0  0  0  0
   -2.2784    2.1599    0.0000 H   0  0  0  0  0  0  0  0  0  0  0  0
   -2.5804    1.0330    0.0000 H   0  0  0  0  0  0  0  0  0  0  0  0
   -1.0409    1.4455    0.0000 H   0  0  0  0  0  0  0  0  0  0  0  0
   -0.0448    1.3141    0.0000 H   0  0  0  0  0  0  0  0  0  0  0  0
   -0.5206    1.5489    0.0000 H   0  0  0  0  0  0  0  0  0  0  0  0
   -1.0253    0.0077    0.0000 H   0  0  0  0  0  0  0  0  0  0  0  0
   -3.1034   -2.1269    0.0000 H   0  0  0  0  0  0  0  0  0  0  0  0
   -3.9284   -0.6979    0.0000 H   0  0  0  0  0  0  0  0  0  0  0  0
   -3.1034    0.7310    0.0000 H   0  0  0  0  0  0  0  0  0  0  0  0
   -2.2784   -2.1269    0.0000 H   0  0  0  0  0  0  0  0  0  0  0  0
   -2.6628   -3.0549    0.0000 H   0  0  0  0  0  0  0  0  0  0  0  0
   -1.8659   -3.6664    0.0000 H   0  0  0  0  0  0  0  0  0  0  0  0
   -1.0690   -3.0549    0.0000 H   0  0  0  0  0  0  0  0  0  0  0  0
   -1.0715   -2.8228    0.0000 H   0  0  0  0  0  0  0  0  0  0  0  0
   -0.2794   -2.8744    0.0000 H   0  0  0  0  0  0  0  0  0  0  0  0
   -1.0253   -1.4036    0.0000 H   0  0  0  0  0  0  0  0  0  0  0  0
    1.3556    0.9521    0.0000 H   0  0  0  0  0  0  0  0  0  0  0  0
    2.7845   -1.5229    0.0000 H   0  0  0  0  0  0  0  0  0  0  0  0
    1.3556   -2.3479    0.0000 H   0  0  0  0  0  0  0  0  0  0  0  0
    3.4990   -0.2854    0.0000 H   0  0  0  0  0  0  0  0  0  0  0  0
  1  2  1  0  0  0  0
  2  3  1  0  0  0  0
  2  4  1  0  0  0  0
  4  5  4  0  0  0  0
  5  6  4  0  0  0  0
  6  7  4  0  0  0  0
  7  8  4  0  0  0  0
  8  9  4  0  0  0  0
  4  9  4  0  0  0  0
  6 10  1  0  0  0  0
 10 11  1  0  0  0  0
 10 12  1  0  0  0  0
  5 13  1  0  0  0  0
 13 14  1  0  0  0  0
 14 15  2  0  0  0  0
 14 16  1  0  0  0  0
 16 17  4  0  0  0  0
 17 18  1  0  0  0  0
 13 18  1  0  0  0  0
 18 19  2  0  0  0  0
 17 20  4  0  0  0  0
 20 21  4  0  0  0  0
 21 22  4  0  0  0  0
 22 23  4  0  0  0  0
 16 23  4  0  0  0  0
 21 24  1  0  0  0  0
  1 25  1  0  0  0  0
  1 26  1  0  0  0  0
  1 27  1  0  0  0  0
  2 28  1  0  0  0  0
  3 29  1  0  0  0  0
  3 30  1  0  0  0  0
  3 31  1  0  0  0  0
  7 32  1  0  0  0  0
  8 33  1  0  0  0  0
  9 34  1  0  0  0  0
 10 35  1  0  0  0  0
 11 36  1  0  0  0  0
 11 37  1  0  0  0  0
 11 38  1  0  0  0  0
 12 39  1  0  0  0  0
 12 40  1  0  0  0  0
 12 41  1  0  0  0  0
 20 42  1  0  0  0  0
 22 43  1  0  0  0  0
 23 44  1  0  0  0  0
 24 45  1  0  0  0  0
M  END
$$$$
60
  Mrv2314 01052423262D          

 22 22  0  0  0  0            999 V2000
    0.7145    2.0625    0.0000 C   0  0  0  0  0  0  0  0  0  0  0  0
    0.7145    1.2375    0.0000 C   0  0  0  0  0  0  0  0  0  0  0  0
    1.4289    0.8250    0.0000 C   0  0  0  0  0  0  0  0  0  0  0  0
    1.4289   -0.0000    0.0000 C   0  0  0  0  0  0  0  0  0  0  0  0
    0.7145   -0.4125    0.0000 C   0  0  0  0  0  0  0  0  0  0  0  0
    0.0000    0.0000    0.0000 C   0  0  0  0  0  0  0  0  0  0  0  0
    0.0000    0.8250    0.0000 C   0  0  0  0  0  0  0  0  0  0  0  0
   -0.7145   -0.4125    0.0000 Cl  0  0  0  0  0  0  0  0  0  0  0  0
    2.1434    1.2375    0.0000 O   0  0  0  0  0  0  0  0  0  0  0  0
    2.1434    2.0625    0.0000 C   0  0  0  0  0  0  0  0  0  0  0  0
    2.8579    2.4750    0.0000 C   0  0  0  0  0  0  0  0  0  0  0  0
    2.8579    3.3000    0.0000 O   0  0  0  0  0  0  0  0  0  0  0  0
    3.5724    2.0625    0.0000 O   0  0  0  0  0  0  0  0  0  0  0  0
    1.5395    2.0625    0.0000 H   0  0  0  0  0  0  0  0  0  0  0  0
    0.7145    2.8875    0.0000 H   0  0  0  0  0  0  0  0  0  0  0  0
   -0.1105    2.0625    0.0000 H   0  0  0  0  0  0  0  0  0  0  0  0
    2.1434   -0.4125    0.0000 H   0  0  0  0  0  0  0  0  0  0  0  0
    0.7145   -1.2375    0.0000 H   0  0  0  0  0  0  0  0  0  0  0  0
   -0.7145    1.2375    0.0000 H   0  0  0  0  0  0  0  0  0  0  0  0
    1.9299    2.8594    0.0000 H   0  0  0  0  0  0  0  0  0  0  0  0
    2.8579    1.6500    0.0000 H   0  0  0  0  0  0  0  0  0  0  0  0
    4.3974    2.0625    0.0000 H   0  0  0  0  0  0  0  0  0  0  0  0
  1  2  1  0  0  0  0
  2  3  4  0  0  0  0
  3  4  4  0  0  0  0
  4  5  4  0  0  0  0
  5  6  4  0  0  0  0
  6  7  4  0  0  0  0
  2  7  4  0  0  0  0
  6  8  1  0  0  0  0
  3  9  1  0  0  0  0
  9 10  1  0  0  0  0
 10 11  1  0  0  0  0
 11 12  2  0  0  0  0
 11 13  1  0  0  0  0
  1 14  1  0  0  0  0
  1 15  1  0  0  0  0
  1 16  1  0  0  0  0
  4 17  1  0  0  0  0
  5 18  1  0  0  0  0
  7 19  1  0  0  0  0
 10 20  1  0  0  0  0
 10 21  1  0  0  0  0
 13 22  1  0  0  0  0
M  END
$$$$
61
  Mrv2314 01052423262D          

 22 22  0  0  0  0            999 V2000
   -0.7145    2.0625    0.0000 C   0  0  0  0  0  0  0  0  0  0  0  0
    0.0000    2.4750    0.0000 C   0  0  0  0  0  0  0  0  0  0  0  0
    0.0000    3.3000    0.0000 C   0  0  0  0  0  0  0  0  0  0  0  0
   -0.7145    3.7125    0.0000 O   0  0  0  0  0  0  0  0  0  0  0  0
    0.7145    3.7125    0.0000 O   0  0  0  0  0  0  0  0  0  0  0  0
    0.7145    2.0625    0.0000 O   0  0  0  0  0  0  0  0  0  0  0  0
    0.7145    1.2375    0.0000 C   0  0  0  0  0  0  0  0  0  0  0  0
    1.4289    0.8250    0.0000 C   0  0  0  0  0  0  0  0  0  0  0  0
    1.4289   -0.0000    0.0000 C   0  0  0  0  0  0  0  0  0  0  0  0
    0.7145   -0.4125    0.0000 C   0  0  0  0  0  0  0  0  0  0  0  0
    0.0000    0.0000    0.0000 C   0  0  0  0  0  0  0  0  0  0  0  0
    0.0000    0.8250    0.0000 C   0  0  0  0  0  0  0  0  0  0  0  0
    2.1434   -0.4125    0.0000 Cl  0  0  0  0  0  0  0  0  0  0  0  0
   -1.1270    2.7770    0.0000 H   0  0  0  0  0  0  0  0  0  0  0  0
   -1.4289    1.6500    0.0000 H   0  0  0  0  0  0  0  0  0  0  0  0
   -0.3020    1.3480    0.0000 H   0  0  0  0  0  0  0  0  0  0  0  0
   -0.7145    2.8875    0.0000 H   0  0  0  0  0  0  0  0  0  0  0  0
    1.4289    3.3000    0.0000 H   0  0  0  0  0  0  0  0  0  0  0  0
    2.1434    1.2375    0.0000 H   0  0  0  0  0  0  0  0  0  0  0  0
    0.7145   -1.2375    0.0000 H   0  0  0  0  0  0  0  0  0  0  0  0
   -0.7145   -0.4125    0.0000 H   0  0  0  0  0  0  0  0  0  0  0  0
   -0.7969    0.6115    0.0000 H   0  0  0  0  0  0  0  0  0  0  0  0
  1  2  1  0  0  0  0
  2  3  1  0  0  0  0
  3  4  2  0  0  0  0
  3  5  1  0  0  0  0
  2  6  1  0  0  0  0
  6  7  1  0  0  0  0
  7  8  4  0  0  0  0
  8  9  4  0  0  0  0
  9 10  4  0  0  0  0
 10 11  4  0  0  0  0
 11 12  4  0  0  0  0
  7 12  4  0  0  0  0
  9 13  1  0  0  0  0
  1 14  1  0  0  0  0
  1 15  1  0  0  0  0
  1 16  1  0  0  0  0
  2 17  1  0  0  0  0
  5 18  1  0  0  0  0
  8 19  1  0  0  0  0
 10 20  1  0  0  0  0
 11 21  1  0  0  0  0
 12 22  1  0  0  0  0
M  END
$$$$
62
  Mrv2314 01052423262D          

 36 35  0  0  0  0            999 V2000
   -1.3184   -3.7125    0.0000 C   0  0  0  0  0  0  0  0  0  0  0  0
   -0.6039   -3.3000    0.0000 C   0  0  0  0  0  0  0  0  0  0  0  0
    0.1105   -3.7125    0.0000 C   0  0  0  0  0  0  0  0  0  0  0  0
   -0.6039   -2.4750    0.0000 C   0  0  0  0  0  0  0  0  0  0  0  0
   -1.3184   -2.0625    0.0000 O   0  0  0  0  0  0  0  0  0  0  0  0
    0.1105   -2.0625    0.0000 O   0  0  0  0  0  0  0  0  0  0  0  0
    0.1105   -1.2375    0.0000 C   0  0  0  0  0  0  0  0  0  0  0  0
    0.8250   -0.8250    0.0000 C   0  0  0  0  0  0  0  0  0  0  0  0
    0.8250    0.0000    0.0000 C   0  0  0  0  0  0  0  0  0  0  0  0
    0.8250    0.8250    0.0000 C   0  0  0  0  0  0  0  0  0  0  0  0
    0.8250    1.6500    0.0000 C   0  0  0  0  0  0  0  0  0  0  0  0
    0.8250    2.4750    0.0000 C   0  0  0  0  0  0  0  0  0  0  0  0
    0.8250    3.3000    0.0000 C   0  0  0  0  0  0  0  0  0  0  0  0
    0.8250    4.1250    0.0000 C   0  0  0  0  0  0  0  0  0  0  0  0
    0.8250    4.9500    0.0000 F   0  0  0  0  0  0  0  0  0  0  0  0
    1.6500    4.1250    0.0000 F   0  0  0  0  0  0  0  0  0  0  0  0
    0.0000    4.1250    0.0000 F   0  0  0  0  0  0  0  0  0  0  0  0
    1.6500    3.3000    0.0000 F   0  0  0  0  0  0  0  0  0  0  0  0
    0.0000    3.3000    0.0000 F   0  0  0  0  0  0  0  0  0  0  0  0
    1.6500    2.4750    0.0000 F   0  0  0  0  0  0  0  0  0  0  0  0
    0.0000    2.4750    0.0000 F   0  0  0  0  0  0  0  0  0  0  0  0
    1.6500    1.6500    0.0000 F   0  0  0  0  0  0  0  0  0  0  0  0
    0.0000    1.6500    0.0000 F   0  0  0  0  0  0  0  0  0  0  0  0
    1.6500    0.8250    0.0000 F   0  0  0  0  0  0  0  0  0  0  0  0
    0.0000    0.8250    0.0000 F   0  0  0  0  0  0  0  0  0  0  0  0
    1.6500   -0.0000    0.0000 F   0  0  0  0  0  0  0  0  0  0  0  0
    0.0000    0.0000    0.0000 F   0  0  0  0  0  0  0  0  0  0  0  0
   -1.7309   -2.9980    0.0000 H   0  0  0  0  0  0  0  0  0  0  0  0
   -2.0329   -4.1250    0.0000 H   0  0  0  0  0  0  0  0  0  0  0  0
   -0.9059   -4.4270    0.0000 H   0  0  0  0  0  0  0  0  0  0  0  0
    0.1105   -4.5375    0.0000 H   0  0  0  0  0  0  0  0  0  0  0  0
    0.8250   -3.3000    0.0000 H   0  0  0  0  0  0  0  0  0  0  0  0
   -0.3428   -0.5482    0.0000 H   0  0  0  0  0  0  0  0  0  0  0  0
   -0.7131   -1.1895    0.0000 H   0  0  0  0  0  0  0  0  0  0  0  0
    1.2783   -1.5143    0.0000 H   0  0  0  0  0  0  0  0  0  0  0  0
    1.6486   -0.8730    0.0000 H   0  0  0  0  0  0  0  0  0  0  0  0
  1  2  1  0  0  0  0
  2  3  2  0  0  0  0
  2  4  1  0  0  0  0
  4  5  2  0  0  0  0
  4  6  1  0  0  0  0
  6  7  1  0  0  0  0
  7  8  1  0  0  0  0
  8  9  1  0  0  0  0
  9 10  1  0  0  0  0
 10 11  1  0  0  0  0
 11 12  1  0  0  0  0
 12 13  1  0  0  0  0
 13 14  1  0  0  0  0
 14 15  1  0  0  0  0
 14 16  1  0  0  0  0
 14 17  1  0  0  0  0
 13 18  1  0  0  0  0
 13 19  1  0  0  0  0
 12 20  1  0  0  0  0
 12 21  1  0  0  0  0
 11 22  1  0  0  0  0
 11 23  1  0  0  0  0
 10 24  1  0  0  0  0
 10 25  1  0  0  0  0
  9 26  1  0  0  0  0
  9 27  1  0  0  0  0
  1 28  1  0  0  0  0
  1 29  1  0  0  0  0
  1 30  1  0  0  0  0
  3 31  1  0  0  0  0
  3 32  1  0  0  0  0
  7 33  1  0  0  0  0
  7 34  1  0  0  0  0
  8 35  1  0  0  0  0
  8 36  1  0  0  0  0
M  END
$$$$
63
  Mrv2314 01052423262D          

 36 36  0  0  0  0            999 V2000
    4.2868   -0.8250    0.0000 C   0  0  0  0  0  0  0  0  0  0  0  0
    5.0013   -1.2375    0.0000 C   0  0  0  0  0  0  0  0  0  0  0  0
    5.7158   -0.8250    0.0000 C   0  0  0  0  0  0  0  0  0  0  0  0
    6.4302   -1.2375    0.0000 C   0  0  0  0  0  0  0  0  0  0  0  0
    7.1447   -0.8250    0.0000 C   0  0  0  0  0  0  0  0  0  0  0  0
    7.8592   -1.2375    0.0000 C   0  0  0  0  0  0  0  0  0  0  0  0
    8.5737   -0.8250    0.0000 C   0  0  0  0  0  0  0  0  0  0  0  0
    9.2881   -1.2375    0.0000 C   0  0  0  0  0  0  0  0  0  0  0  0
    9.2881   -2.0625    0.0000 C   0  0  0  0  0  0  0  0  0  0  0  0
   10.0026   -2.4750    0.0000 C   0  0  0  0  0  0  0  0  0  0  0  0
   10.0026   -3.3000    0.0000 C   0  0  0  0  0  0  0  0  0  0  0  0
    9.2881   -3.7125    0.0000 C   0  0  0  0  0  0  0  0  0  0  0  0
    8.5737   -3.3000    0.0000 C   0  0  0  0  0  0  0  0  0  0  0  0
    8.5737   -2.4750    0.0000 C   0  0  0  0  0  0  0  0  0  0  0  0
    8.5737    0.0000    0.0000 C   0  0  0  0  0  0  0  0  0  0  0  0
    9.2881    0.4125    0.0000 O   0  0  0  0  0  0  0  0  0  0  0  0
    4.6993   -0.1105    0.0000 H   0  0  0  0  0  0  0  0  0  0  0  0
    3.5724   -0.4125    0.0000 H   0  0  0  0  0  0  0  0  0  0  0  0
    3.8743   -1.5395    0.0000 H   0  0  0  0  0  0  0  0  0  0  0  0
    4.6310   -1.9747    0.0000 H   0  0  0  0  0  0  0  0  0  0  0  0
    5.3716   -1.9747    0.0000 H   0  0  0  0  0  0  0  0  0  0  0  0
    6.0860   -0.0878    0.0000 H   0  0  0  0  0  0  0  0  0  0  0  0
    5.3455   -0.0878    0.0000 H   0  0  0  0  0  0  0  0  0  0  0  0
    6.0600   -1.9747    0.0000 H   0  0  0  0  0  0  0  0  0  0  0  0
    6.8005   -1.9747    0.0000 H   0  0  0  0  0  0  0  0  0  0  0  0
    7.5150   -0.0878    0.0000 H   0  0  0  0  0  0  0  0  0  0  0  0
    6.7745   -0.0878    0.0000 H   0  0  0  0  0  0  0  0  0  0  0  0
    7.4889   -1.9747    0.0000 H   0  0  0  0  0  0  0  0  0  0  0  0
    8.2294   -1.9747    0.0000 H   0  0  0  0  0  0  0  0  0  0  0  0
   10.0026   -0.8250    0.0000 H   0  0  0  0  0  0  0  0  0  0  0  0
   10.7171   -2.0625    0.0000 H   0  0  0  0  0  0  0  0  0  0  0  0
   10.7171   -3.7125    0.0000 H   0  0  0  0  0  0  0  0  0  0  0  0
    9.2881   -4.5375    0.0000 H   0  0  0  0  0  0  0  0  0  0  0  0
    7.8592   -3.7125    0.0000 H   0  0  0  0  0  0  0  0  0  0  0  0
    7.7858   -2.7199    0.0000 H   0  0  0  0  0  0  0  0  0  0  0  0
    7.8592    0.4125    0.0000 H   0  0  0  0  0  0  0  0  0  0  0  0
  1  2  1  0  0  0  0
  2  3  1  0  0  0  0
  3  4  1  0  0  0  0
  4  5  1  0  0  0  0
  5  6  1  0  0  0  0
  6  7  1  0  0  0  0
  7  8  2  0  0  0  0
  8  9  1  0  0  0  0
  9 10  4  0  0  0  0
 10 11  4  0  0  0  0
 11 12  4  0  0  0  0
 12 13  4  0  0  0  0
 13 14  4  0  0  0  0
  9 14  4  0  0  0  0
  7 15  1  0  0  0  0
 15 16  2  0  0  0  0
  1 17  1  0  0  0  0
  1 18  1  0  0  0  0
  1 19  1  0  0  0  0
  2 20  1  0  0  0  0
  2 21  1  0  0  0  0
  3 22  1  0  0  0  0
  3 23  1  0  0  0  0
  4 24  1  0  0  0  0
  4 25  1  0  0  0  0
  5 26  1  0  0  0  0
  5 27  1  0  0  0  0
  6 28  1  0  0  0  0
  6 29  1  0  0  0  0
  8 30  1  0  0  0  0
 10 31  1  0  0  0  0
 11 32  1  0  0  0  0
 12 33  1  0  0  0  0
 13 34  1  0  0  0  0
 14 35  1  0  0  0  0
 15 36  1  0  0  0  0
M  END
$$$$
64
  Mrv2314 01052423262D          

 20 21  0  0  0  0            999 V2000
   -2.2657    4.5517    0.0000 C   0  0  0  0  0  0  0  0  0  0  0  0
   -1.8532    5.2661    0.0000 C   0  0  0  0  0  0  0  0  0  0  0  0
   -1.0282    5.2661    0.0000 C   0  0  0  0  0  0  0  0  0  0  0  0
   -0.6157    4.5517    0.0000 C   0  0  0  0  0  0  0  0  0  0  0  0
   -1.0282    3.8372    0.0000 C   0  0  0  0  0  0  0  0  0  0  0  0
   -1.8532    3.8372    0.0000 C   0  0  0  0  0  0  0  0  0  0  0  0
   -0.4761    3.2241    0.0000 N   0  0  0  0  0  0  0  0  0  0  0  0
    0.2775    3.5596    0.0000 C   0  0  0  0  0  0  0  0  0  0  0  0
    0.1913    4.3801    0.0000 S   0  0  0  0  0  0  0  0  0  0  0  0
    0.9920    3.1471    0.0000 S   0  0  0  0  0  0  0  0  0  0  0  0
    1.7065    3.5596    0.0000 C   0  0  0  0  0  0  0  0  0  0  0  0
    2.4209    3.1471    0.0000 S   0  0  0  0  0  0  0  0  0  0  0  0
    3.1354    3.5596    0.0000 C   0  0  0  0  0  0  0  0  0  0  0  0
    3.8499    3.9721    0.0000 N   0  0  0  0  0  0  0  0  0  0  0  0
   -3.0907    4.5517    0.0000 H   0  0  0  0  0  0  0  0  0  0  0  0
   -2.2657    5.9806    0.0000 H   0  0  0  0  0  0  0  0  0  0  0  0
   -0.6157    5.9806    0.0000 H   0  0  0  0  0  0  0  0  0  0  0  0
   -2.2657    3.1227    0.0000 H   0  0  0  0  0  0  0  0  0  0  0  0
    2.0767    4.2969    0.0000 H   0  0  0  0  0  0  0  0  0  0  0  0
    1.3362    4.2969    0.0000 H   0  0  0  0  0  0  0  0  0  0  0  0
  1  2  4  0  0  0  0
  2  3  4  0  0  0  0
  3  4  4  0  0  0  0
  4  5  4  0  0  0  0
  5  6  4  0  0  0  0
  1  6  4  0  0  0  0
  5  7  4  0  0  0  0
  7  8  4  0  0  0  0
  8  9  4  0  0  0  0
  4  9  4  0  0  0  0
  8 10  1  0  0  0  0
 10 11  1  0  0  0  0
 11 12  1  0  0  0  0
 12 13  1  0  0  0  0
 13 14  3  0  0  0  0
  1 15  1  0  0  0  0
  2 16  1  0  0  0  0
  3 17  1  0  0  0  0
  6 18  1  0  0  0  0
 11 19  1  0  0  0  0
 11 20  1  0  0  0  0
M  END
$$$$
65
  Mrv2314 01052423262D          

 22 23  0  0  0  0            999 V2000
    0.7145   -1.2375    0.0000 C   0  0  0  0  0  0  0  0  0  0  0  0
    1.4289   -1.6500    0.0000 C   0  0  0  0  0  0  0  0  0  0  0  0
    1.4289   -2.4750    0.0000 C   0  0  0  0  0  0  0  0  0  0  0  0
    0.7145   -2.8875    0.0000 C   0  0  0  0  0  0  0  0  0  0  0  0
    0.0000   -2.4750    0.0000 C   0  0  0  0  0  0  0  0  0  0  0  0
    0.0000   -1.6500    0.0000 C   0  0  0  0  0  0  0  0  0  0  0  0
   -0.7145   -1.2375    0.0000 Cl  0  0  0  0  0  0  0  0  0  0  0  0
   -0.7145   -2.8875    0.0000 C   0  0  0  0  0  0  0  0  0  0  0  0
   -0.7145   -3.7125    0.0000 C   0  0  0  0  0  0  0  0  0  0  0  0
   -1.4289   -4.1250    0.0000 C   0  0  0  0  0  0  0  0  0  0  0  0
   -2.1434   -3.7125    0.0000 C   0  0  0  0  0  0  0  0  0  0  0  0
   -2.1434   -2.8875    0.0000 C   0  0  0  0  0  0  0  0  0  0  0  0
   -1.4289   -2.4750    0.0000 C   0  0  0  0  0  0  0  0  0  0  0  0
   -1.4289   -1.6500    0.0000 Cl  0  0  0  0  0  0  0  0  0  0  0  0
   -2.8579   -2.4750    0.0000 Cl  0  0  0  0  0  0  0  0  0  0  0  0
    0.0000   -4.1250    0.0000 Cl  0  0  0  0  0  0  0  0  0  0  0  0
    0.7145   -3.7125    0.0000 Cl  0  0  0  0  0  0  0  0  0  0  0  0
    2.1434   -2.8875    0.0000 Cl  0  0  0  0  0  0  0  0  0  0  0  0
    0.7145   -0.4125    0.0000 H   0  0  0  0  0  0  0  0  0  0  0  0
    2.1434   -1.2375    0.0000 H   0  0  0  0  0  0  0  0  0  0  0  0
   -1.4289   -4.9500    0.0000 H   0  0  0  0  0  0  0  0  0  0  0  0
   -2.8579   -4.1250    0.0000 H   0  0  0  0  0  0  0  0  0  0  0  0
  1  2  4  0  0  0  0
  2  3  4  0  0  0  0
  3  4  4  0  0  0  0
  4  5  4  0  0  0  0
  5  6  4  0  0  0  0
  1  6  4  0  0  0  0
  6  7  1  0  0  0  0
  5  8  1  0  0  0  0
  8  9  4  0  0  0  0
  9 10  4  0  0  0  0
 10 11  4  0  0  0  0
 11 12  4  0  0  0  0
 12 13  4  0  0  0  0
  8 13  4  0  0  0  0
 13 14  1  0  0  0  0
 12 15  1  0  0  0  0
  9 16  1  0  0  0  0
  4 17  1  0  0  0  0
  3 18  1  0  0  0  0
  1 19  1  0  0  0  0
  2 20  1  0  0  0  0
 10 21  1  0  0  0  0
 11 22  1  0  0  0  0
M  END
$$$$
66
  Mrv2314 01052423262D          

 22 23  0  0  0  0            999 V2000
    0.7145   -1.2375    0.0000 C   0  0  0  0  0  0  0  0  0  0  0  0
    1.4289   -1.6500    0.0000 C   0  0  0  0  0  0  0  0  0  0  0  0
    1.4289   -2.4750    0.0000 C   0  0  0  0  0  0  0  0  0  0  0  0
    0.7145   -2.8875    0.0000 C   0  0  0  0  0  0  0  0  0  0  0  0
    0.0000   -2.4750    0.0000 C   0  0  0  0  0  0  0  0  0  0  0  0
    0.0000   -1.6500    0.0000 C   0  0  0  0  0  0  0  0  0  0  0  0
   -0.7145   -1.2375    0.0000 Cl  0  0  0  0  0  0  0  0  0  0  0  0
   -0.7145   -2.8875    0.0000 Cl  0  0  0  0  0  0  0  0  0  0  0  0
    2.1434   -2.8875    0.0000 Cl  0  0  0  0  0  0  0  0  0  0  0  0
    2.1434   -1.2375    0.0000 C   0  0  0  0  0  0  0  0  0  0  0  0
    2.1434   -0.4125    0.0000 C   0  0  0  0  0  0  0  0  0  0  0  0
    2.8579   -0.0000    0.0000 C   0  0  0  0  0  0  0  0  0  0  0  0
    3.5724   -0.4125    0.0000 C   0  0  0  0  0  0  0  0  0  0  0  0
    3.5724   -1.2375    0.0000 C   0  0  0  0  0  0  0  0  0  0  0  0
    2.8579   -1.6500    0.0000 C   0  0  0  0  0  0  0  0  0  0  0  0
    2.8579   -2.4750    0.0000 Cl  0  0  0  0  0  0  0  0  0  0  0  0
    4.2868   -0.0000    0.0000 Cl  0  0  0  0  0  0  0  0  0  0  0  0
    2.8579    0.8250    0.0000 Cl  0  0  0  0  0  0  0  0  0  0  0  0
    0.7145   -0.4125    0.0000 H   0  0  0  0  0  0  0  0  0  0  0  0
    0.7145   -3.7125    0.0000 H   0  0  0  0  0  0  0  0  0  0  0  0
    1.4289    0.0000    0.0000 H   0  0  0  0  0  0  0  0  0  0  0  0
    4.2868   -1.6500    0.0000 H   0  0  0  0  0  0  0  0  0  0  0  0
  1  2  4  0  0  0  0
  2  3  4  0  0  0  0
  3  4  4  0  0  0  0
  4  5  4  0  0  0  0
  5  6  4  0  0  0  0
  1  6  4  0  0  0  0
  6  7  1  0  0  0  0
  5  8  1  0  0  0  0
  3  9  1  0  0  0  0
  2 10  1  0  0  0  0
 10 11  4  0  0  0  0
 11 12  4  0  0  0  0
 12 13  4  0  0  0  0
 13 14  4  0  0  0  0
 14 15  4  0  0  0  0
 10 15  4  0  0  0  0
 15 16  1  0  0  0  0
 13 17  1  0  0  0  0
 12 18  1  0  0  0  0
  1 19  1  0  0  0  0
  4 20  1  0  0  0  0
 11 21  1  0  0  0  0
 14 22  1  0  0  0  0
M  END
$$$$
67
  Mrv2314 01052423262D          

 22 23  0  0  0  0            999 V2000
    0.7145   -1.2375    0.0000 C   0  0  0  0  0  0  0  0  0  0  0  0
    1.4289   -1.6500    0.0000 C   0  0  0  0  0  0  0  0  0  0  0  0
    1.4289   -2.4750    0.0000 C   0  0  0  0  0  0  0  0  0  0  0  0
    0.7145   -2.8875    0.0000 C   0  0  0  0  0  0  0  0  0  0  0  0
    0.0000   -2.4750    0.0000 C   0  0  0  0  0  0  0  0  0  0  0  0
    0.0000   -1.6500    0.0000 C   0  0  0  0  0  0  0  0  0  0  0  0
   -0.7145   -1.2375    0.0000 Cl  0  0  0  0  0  0  0  0  0  0  0  0
   -0.7145   -2.8875    0.0000 C   0  0  0  0  0  0  0  0  0  0  0  0
   -0.7145   -3.7125    0.0000 C   0  0  0  0  0  0  0  0  0  0  0  0
   -1.4289   -4.1250    0.0000 C   0  0  0  0  0  0  0  0  0  0  0  0
   -2.1434   -3.7125    0.0000 C   0  0  0  0  0  0  0  0  0  0  0  0
   -2.1434   -2.8875    0.0000 C   0  0  0  0  0  0  0  0  0  0  0  0
   -1.4289   -2.4750    0.0000 C   0  0  0  0  0  0  0  0  0  0  0  0
   -1.4289   -1.6500    0.0000 Cl  0  0  0  0  0  0  0  0  0  0  0  0
   -2.8579   -4.1250    0.0000 Cl  0  0  0  0  0  0  0  0  0  0  0  0
    0.0000   -4.1250    0.0000 Cl  0  0  0  0  0  0  0  0  0  0  0  0
    0.7145   -3.7125    0.0000 Cl  0  0  0  0  0  0  0  0  0  0  0  0
    2.1434   -1.2375    0.0000 Cl  0  0  0  0  0  0  0  0  0  0  0  0
    0.7145   -0.4125    0.0000 H   0  0  0  0  0  0  0  0  0  0  0  0
    2.1434   -2.8875    0.0000 H   0  0  0  0  0  0  0  0  0  0  0  0
   -1.4289   -4.9500    0.0000 H   0  0  0  0  0  0  0  0  0  0  0  0
   -2.8579   -2.4750    0.0000 H   0  0  0  0  0  0  0  0  0  0  0  0
  1  2  4  0  0  0  0
  2  3  4  0  0  0  0
  3  4  4  0  0  0  0
  4  5  4  0  0  0  0
  5  6  4  0  0  0  0
  1  6  4  0  0  0  0
  6  7  1  0  0  0  0
  5  8  1  0  0  0  0
  8  9  4  0  0  0  0
  9 10  4  0  0  0  0
 10 11  4  0  0  0  0
 11 12  4  0  0  0  0
 12 13  4  0  0  0  0
  8 13  4  0  0  0  0
 13 14  1  0  0  0  0
 11 15  1  0  0  0  0
  9 16  1  0  0  0  0
  4 17  1  0  0  0  0
  2 18  1  0  0  0  0
  1 19  1  0  0  0  0
  3 20  1  0  0  0  0
 10 21  1  0  0  0  0
 12 22  1  0  0  0  0
M  END
$$$$
68
  Mrv2314 01052423262D          

 28 29  0  0  0  0            999 V2000
    2.1434   -1.2375    0.0000 C   0  0  0  0  0  0  0  0  0  0  0  0
    2.8579   -1.6500    0.0000 C   0  0  0  0  0  0  0  0  0  0  0  0
    2.8579   -2.4750    0.0000 C   0  0  0  0  0  0  0  0  0  0  0  0
    2.1434   -2.8875    0.0000 C   0  0  0  0  0  0  0  0  0  0  0  0
    1.4289   -2.4750    0.0000 C   0  0  0  0  0  0  0  0  0  0  0  0
    1.4289   -1.6500    0.0000 C   0  0  0  0  0  0  0  0  0  0  0  0
    0.7145   -1.2375    0.0000 O   0  0  0  0  0  0  0  0  0  0  0  0
    2.1434   -3.7125    0.0000 O   0  0  0  0  0  0  0  0  0  0  0  0
    3.5724   -2.8875    0.0000 C   0  0  0  0  0  0  0  0  0  0  0  0
    4.2868   -2.4750    0.0000 O   0  0  0  0  0  0  0  0  0  0  0  0
    3.5724   -3.7125    0.0000 C   0  0  0  0  0  0  0  0  0  0  0  0
    4.2868   -4.1250    0.0000 C   0  0  0  0  0  0  0  0  0  0  0  0
    4.2868   -4.9500    0.0000 C   0  0  0  0  0  0  0  0  0  0  0  0
    3.5724   -5.3625    0.0000 C   0  0  0  0  0  0  0  0  0  0  0  0
    2.8579   -4.9500    0.0000 C   0  0  0  0  0  0  0  0  0  0  0  0
    2.8579   -4.1250    0.0000 C   0  0  0  0  0  0  0  0  0  0  0  0
    3.5724   -6.1875    0.0000 O   0  0  0  0  0  0  0  0  0  0  0  0
    5.0013   -3.7125    0.0000 O   0  0  0  0  0  0  0  0  0  0  0  0
    2.1434   -0.4125    0.0000 H   0  0  0  0  0  0  0  0  0  0  0  0
    3.5724   -1.2375    0.0000 H   0  0  0  0  0  0  0  0  0  0  0  0
    0.7145   -2.8875    0.0000 H   0  0  0  0  0  0  0  0  0  0  0  0
    0.7145   -0.4125    0.0000 H   0  0  0  0  0  0  0  0  0  0  0  0
    1.4289   -4.1250    0.0000 H   0  0  0  0  0  0  0  0  0  0  0  0
    5.0013   -5.3625    0.0000 H   0  0  0  0  0  0  0  0  0  0  0  0
    2.1434   -5.3625    0.0000 H   0  0  0  0  0  0  0  0  0  0  0  0
    2.8579   -3.3000    0.0000 H   0  0  0  0  0  0  0  0  0  0  0  0
    2.8579   -6.6000    0.0000 H   0  0  0  0  0  0  0  0  0  0  0  0
    5.7158   -4.1250    0.0000 H   0  0  0  0  0  0  0  0  0  0  0  0
  1  2  4  0  0  0  0
  2  3  4  0  0  0  0
  3  4  4  0  0  0  0
  4  5  4  0  0  0  0
  5  6  4  0  0  0  0
  1  6  4  0  0  0  0
  6  7  1  0  0  0  0
  4  8  1  0  0  0  0
  3  9  1  0  0  0  0
  9 10  2  0  0  0  0
  9 11  1  0  0  0  0
 11 12  4  0  0  0  0
 12 13  4  0  0  0  0
 13 14  4  0  0  0  0
 14 15  4  0  0  0  0
 15 16  4  0  0  0  0
 11 16  4  0  0  0  0
 14 17  1  0  0  0  0
 12 18  1  0  0  0  0
  1 19  1  0  0  0  0
  2 20  1  0  0  0  0
  5 21  1  0  0  0  0
  7 22  1  0  0  0  0
  8 23  1  0  0  0  0
 13 24  1  0  0  0  0
 15 25  1  0  0  0  0
 16 26  1  0  0  0  0
 17 27  1  0  0  0  0
 18 28  1  0  0  0  0
M  END
$$$$
69
  Mrv2314 01052423262D          

 50 49  0  0  0  0            999 V2000
    1.6500   -1.4289    0.0000 C   0  0  0  0  0  0  0  0  0  0  0  0
    1.2375   -0.7145    0.0000 C   0  0  0  0  0  0  0  0  0  0  0  0
    0.4125   -0.7145    0.0000 C   0  0  0  0  0  0  0  0  0  0  0  0
    1.6500   -0.0000    0.0000 C   0  0  0  0  0  0  0  0  0  0  0  0
    2.4750   -0.0000    0.0000 C   0  0  0  0  0  0  0  0  0  0  0  0
    2.4750    0.8250    0.0000 C   0  0  0  0  0  0  0  0  0  0  0  0
    2.4750   -0.8250    0.0000 C   0  0  0  0  0  0  0  0  0  0  0  0
    3.3000    0.0000    0.0000 C   0  0  0  0  0  0  0  0  0  0  0  0
    3.7125   -0.7145    0.0000 O   0  0  0  0  0  0  0  0  0  0  0  0
    4.5375   -0.7145    0.0000 C   0  0  0  0  0  0  0  0  0  0  0  0
    4.9500   -0.0000    0.0000 O   0  0  0  0  0  0  0  0  0  0  0  0
    4.9500   -1.4289    0.0000 C   0  0  0  0  0  0  0  0  0  0  0  0
    5.7750   -1.4289    0.0000 C   0  0  0  0  0  0  0  0  0  0  0  0
    4.5375   -2.1434    0.0000 C   0  0  0  0  0  0  0  0  0  0  0  0
    1.2375    0.7145    0.0000 O   0  0  0  0  0  0  0  0  0  0  0  0
    0.4125    0.7145    0.0000 C   0  0  0  0  0  0  0  0  0  0  0  0
    0.0000   -0.0000    0.0000 O   0  0  0  0  0  0  0  0  0  0  0  0
    0.0000    1.4289    0.0000 C   0  0  0  0  0  0  0  0  0  0  0  0
   -0.8250    1.4289    0.0000 C   0  0  0  0  0  0  0  0  0  0  0  0
    0.4125    2.1434    0.0000 C   0  0  0  0  0  0  0  0  0  0  0  0
    0.9355   -1.8414    0.0000 H   0  0  0  0  0  0  0  0  0  0  0  0
    2.0625   -2.1434    0.0000 H   0  0  0  0  0  0  0  0  0  0  0  0
    2.3645   -1.0164    0.0000 H   0  0  0  0  0  0  0  0  0  0  0  0
    0.8250   -1.4289    0.0000 H   0  0  0  0  0  0  0  0  0  0  0  0
   -0.4000   -0.8577    0.0000 H   0  0  0  0  0  0  0  0  0  0  0  0
   -0.1178   -1.3465    0.0000 H   0  0  0  0  0  0  0  0  0  0  0  0
    0.8250   -0.0000    0.0000 H   0  0  0  0  0  0  0  0  0  0  0  0
    2.0625   -0.7145    0.0000 H   0  0  0  0  0  0  0  0  0  0  0  0
    3.3000    0.8250    0.0000 H   0  0  0  0  0  0  0  0  0  0  0  0
    2.4750    1.6500    0.0000 H   0  0  0  0  0  0  0  0  0  0  0  0
    1.6500    0.8250    0.0000 H   0  0  0  0  0  0  0  0  0  0  0  0
    2.7907   -1.5872    0.0000 H   0  0  0  0  0  0  0  0  0  0  0  0
    3.2719   -1.0385    0.0000 H   0  0  0  0  0  0  0  0  0  0  0  0
    3.1295   -0.3228    0.0000 H   0  0  0  0  0  0  0  0  0  0  0  0
    4.0969    0.2135    0.0000 H   0  0  0  0  0  0  0  0  0  0  0  0
    2.7166    0.5834    0.0000 H   0  0  0  0  0  0  0  0  0  0  0  0
    5.3625   -0.7145    0.0000 H   0  0  0  0  0  0  0  0  0  0  0  0
    5.5615   -2.2258    0.0000 H   0  0  0  0  0  0  0  0  0  0  0  0
    6.4895   -1.8414    0.0000 H   0  0  0  0  0  0  0  0  0  0  0  0
    6.3584   -0.8456    0.0000 H   0  0  0  0  0  0  0  0  0  0  0  0
    3.8230   -1.7309    0.0000 H   0  0  0  0  0  0  0  0  0  0  0  0
    4.1250   -2.8579    0.0000 H   0  0  0  0  0  0  0  0  0  0  0  0
    5.2520   -2.5559    0.0000 H   0  0  0  0  0  0  0  0  0  0  0  0
   -0.4125    0.7145    0.0000 H   0  0  0  0  0  0  0  0  0  0  0  0
   -0.6115    2.2258    0.0000 H   0  0  0  0  0  0  0  0  0  0  0  0
   -1.5395    1.8414    0.0000 H   0  0  0  0  0  0  0  0  0  0  0  0
   -1.4084    0.8456    0.0000 H   0  0  0  0  0  0  0  0  0  0  0  0
    1.1270    1.7309    0.0000 H   0  0  0  0  0  0  0  0  0  0  0  0
    0.8250    2.8579    0.0000 H   0  0  0  0  0  0  0  0  0  0  0  0
   -0.3020    2.5559    0.0000 H   0  0  0  0  0  0  0  0  0  0  0  0
  1  2  1  0  0  0  0
  2  3  1  0  0  0  0
  2  4  1  0  0  0  0
  4  5  1  0  0  0  0
  5  6  1  0  0  0  0
  5  7  1  0  0  0  0
  5  8  1  0  0  0  0
  8  9  1  0  0  0  0
  9 10  1  0  0  0  0
 10 11  2  0  0  0  0
 10 12  1  0  0  0  0
 12 13  1  0  0  0  0
 12 14  1  0  0  0  0
  4 15  1  0  0  0  0
 15 16  1  0  0  0  0
 16 17  2  0  0  0  0
 16 18  1  0  0  0  0
 18 19  1  0  0  0  0
 18 20  1  0  0  0  0
  1 21  1  0  0  0  0
  1 22  1  0  0  0  0
  1 23  1  0  0  0  0
  2 24  1  0  0  0  0
  3 25  1  0  0  0  0
  3 26  1  0  0  0  0
  3 27  1  0  0  0  0
  4 28  1  0  0  0  0
  6 29  1  0  0  0  0
  6 30  1  0  0  0  0
  6 31  1  0  0  0  0
  7 32  1  0  0  0  0
  7 33  1  0  0  0  0
  7 34  1  0  0  0  0
  8 35  1  0  0  0  0
  8 36  1  0  0  0  0
 12 37  1  0  0  0  0
 13 38  1  0  0  0  0
 13 39  1  0  0  0  0
 13 40  1  0  0  0  0
 14 41  1  0  0  0  0
 14 42  1  0  0  0  0
 14 43  1  0  0  0  0
 18 44  1  0  0  0  0
 19 45  1  0  0  0  0
 19 46  1  0  0  0  0
 19 47  1  0  0  0  0
 20 48  1  0  0  0  0
 20 49  1  0  0  0  0
 20 50  1  0  0  0  0
M  END
$$$$
70
  Mrv2314 01052423262D          

 33 34  0  0  0  0            999 V2000
    1.5395   -1.2375    0.0000 C   0  0  0  0  0  0  0  0  0  0  0  0
    0.7145   -1.2375    0.0000 C   0  0  0  0  0  0  0  0  0  0  0  0
   -0.1105   -1.2375    0.0000 C   0  0  0  0  0  0  0  0  0  0  0  0
    0.7145   -2.0625    0.0000 C   0  0  0  0  0  0  0  0  0  0  0  0
    1.4289   -2.4750    0.0000 C   0  0  0  0  0  0  0  0  0  0  0  0
    1.4289   -3.3000    0.0000 C   0  0  0  0  0  0  0  0  0  0  0  0
    0.7145   -3.7125    0.0000 C   0  0  0  0  0  0  0  0  0  0  0  0
    0.0000   -3.3000    0.0000 C   0  0  0  0  0  0  0  0  0  0  0  0
    0.0000   -2.4750    0.0000 C   0  0  0  0  0  0  0  0  0  0  0  0
   -0.7145   -3.7125    0.0000 Cl  0  0  0  0  0  0  0  0  0  0  0  0
    0.7145   -4.5375    0.0000 O   0  0  0  0  0  0  0  0  0  0  0  0
    2.1434   -3.7125    0.0000 Cl  0  0  0  0  0  0  0  0  0  0  0  0
    0.7145   -0.4125    0.0000 C   0  0  0  0  0  0  0  0  0  0  0  0
    0.0000    0.0000    0.0000 C   0  0  0  0  0  0  0  0  0  0  0  0
    0.0000    0.8250    0.0000 C   0  0  0  0  0  0  0  0  0  0  0  0
    0.7145    1.2375    0.0000 C   0  0  0  0  0  0  0  0  0  0  0  0
    1.4289    0.8250    0.0000 C   0  0  0  0  0  0  0  0  0  0  0  0
    1.4289   -0.0000    0.0000 C   0  0  0  0  0  0  0  0  0  0  0  0
    2.1434    1.2375    0.0000 Cl  0  0  0  0  0  0  0  0  0  0  0  0
    0.7145    2.0625    0.0000 O   0  0  0  0  0  0  0  0  0  0  0  0
   -0.7145    1.2375    0.0000 Cl  0  0  0  0  0  0  0  0  0  0  0  0
    1.5395   -2.0625    0.0000 H   0  0  0  0  0  0  0  0  0  0  0  0
    2.3645   -1.2375    0.0000 H   0  0  0  0  0  0  0  0  0  0  0  0
    1.5395   -0.4125    0.0000 H   0  0  0  0  0  0  0  0  0  0  0  0
   -0.1105   -0.4125    0.0000 H   0  0  0  0  0  0  0  0  0  0  0  0
   -0.9355   -1.2375    0.0000 H   0  0  0  0  0  0  0  0  0  0  0  0
   -0.1105   -2.0625    0.0000 H   0  0  0  0  0  0  0  0  0  0  0  0
    2.2469   -2.5827    0.0000 H   0  0  0  0  0  0  0  0  0  0  0  0
   -0.8179   -2.5827    0.0000 H   0  0  0  0  0  0  0  0  0  0  0  0
    0.0000   -4.9500    0.0000 H   0  0  0  0  0  0  0  0  0  0  0  0
   -0.8179    0.1077    0.0000 H   0  0  0  0  0  0  0  0  0  0  0  0
    2.2469    0.1077    0.0000 H   0  0  0  0  0  0  0  0  0  0  0  0
    1.4289    2.4750    0.0000 H   0  0  0  0  0  0  0  0  0  0  0  0
  1  2  1  0  0  0  0
  2  3  1  0  0  0  0
  2  4  1  0  0  0  0
  4  5  4  0  0  0  0
  5  6  4  0  0  0  0
  6  7  4  0  0  0  0
  7  8  4  0  0  0  0
  8  9  4  0  0  0  0
  4  9  4  0  0  0  0
  8 10  1  0  0  0  0
  7 11  1  0  0  0  0
  6 12  1  0  0  0  0
  2 13  1  0  0  0  0
 13 14  4  0  0  0  0
 14 15  4  0  0  0  0
 15 16  4  0  0  0  0
 16 17  4  0  0  0  0
 17 18  4  0  0  0  0
 13 18  4  0  0  0  0
 17 19  1  0  0  0  0
 16 20  1  0  0  0  0
 15 21  1  0  0  0  0
  1 22  1  0  0  0  0
  1 23  1  0  0  0  0
  1 24  1  0  0  0  0
  3 25  1  0  0  0  0
  3 26  1  0  0  0  0
  3 27  1  0  0  0  0
  5 28  1  0  0  0  0
  9 29  1  0  0  0  0
 11 30  1  0  0  0  0
 14 31  1  0  0  0  0
 18 32  1  0  0  0  0
 20 33  1  0  0  0  0
M  END
$$$$
71
  Mrv2314 01052423262D          

 30 31  0  0  0  0            999 V2000
    2.1434   -1.2375    0.0000 C   0  0  0  0  0  0  0  0  0  0  0  0
    2.8579   -1.6500    0.0000 C   0  0  0  0  0  0  0  0  0  0  0  0
    2.8579   -2.4750    0.0000 C   0  0  0  0  0  0  0  0  0  0  0  0
    2.1434   -2.8875    0.0000 C   0  0  0  0  0  0  0  0  0  0  0  0
    1.4289   -2.4750    0.0000 C   0  0  0  0  0  0  0  0  0  0  0  0
    1.4289   -1.6500    0.0000 C   0  0  0  0  0  0  0  0  0  0  0  0
    0.7145   -1.2375    0.0000 C   0  0  0  0  0  0  0  0  0  0  0  0
    0.7145   -0.4125    0.0000 C   0  0  0  0  0  0  0  0  0  0  0  0
    0.0000    0.0000    0.0000 C   0  0  0  0  0  0  0  0  0  0  0  0
    0.0000    0.8250    0.0000 C   0  0  0  0  0  0  0  0  0  0  0  0
    0.7145    1.2375    0.0000 C   0  0  0  0  0  0  0  0  0  0  0  0
    1.4289    0.8250    0.0000 C   0  0  0  0  0  0  0  0  0  0  0  0
    1.4289    0.0000    0.0000 C   0  0  0  0  0  0  0  0  0  0  0  0
    0.7145    2.0625    0.0000 O   0  0  0  0  0  0  0  0  0  0  0  0
    0.0000   -1.6500    0.0000 C   0  0  0  0  0  0  0  0  0  0  0  0
   -0.7145   -2.0625    0.0000 Cl  0  0  0  0  0  0  0  0  0  0  0  0
   -0.4125   -0.9355    0.0000 Cl  0  0  0  0  0  0  0  0  0  0  0  0
    0.4125   -2.3645    0.0000 Cl  0  0  0  0  0  0  0  0  0  0  0  0
    3.5724   -2.8875    0.0000 O   0  0  0  0  0  0  0  0  0  0  0  0
    2.1434   -0.4125    0.0000 H   0  0  0  0  0  0  0  0  0  0  0  0
    3.5724   -1.2375    0.0000 H   0  0  0  0  0  0  0  0  0  0  0  0
    2.1434   -3.7125    0.0000 H   0  0  0  0  0  0  0  0  0  0  0  0
    0.7145   -2.8875    0.0000 H   0  0  0  0  0  0  0  0  0  0  0  0
    1.4289   -0.8250    0.0000 H   0  0  0  0  0  0  0  0  0  0  0  0
   -0.7145   -0.4125    0.0000 H   0  0  0  0  0  0  0  0  0  0  0  0
   -0.7145    1.2375    0.0000 H   0  0  0  0  0  0  0  0  0  0  0  0
    2.1434    1.2375    0.0000 H   0  0  0  0  0  0  0  0  0  0  0  0
    0.7145    0.4125    0.0000 H   0  0  0  0  0  0  0  0  0  0  0  0
    1.4289    2.4750    0.0000 H   0  0  0  0  0  0  0  0  0  0  0  0
    3.5724   -3.7125    0.0000 H   0  0  0  0  0  0  0  0  0  0  0  0
  1  2  4  0  0  0  0
  2  3  4  0  0  0  0
  3  4  4  0  0  0  0
  4  5  4  0  0  0  0
  5  6  4  0  0  0  0
  1  6  4  0  0  0  0
  6  7  1  0  0  0  0
  7  8  1  0  0  0  0
  8  9  4  0  0  0  0
  9 10  4  0  0  0  0
 10 11  4  0  0  0  0
 11 12  4  0  0  0  0
 12 13  4  0  0  0  0
  8 13  4  0  0  0  0
 11 14  1  0  0  0  0
  7 15  1  0  0  0  0
 15 16  1  0  0  0  0
 15 17  1  0  0  0  0
 15 18  1  0  0  0  0
  3 19  1  0  0  0  0
  1 20  1  0  0  0  0
  2 21  1  0  0  0  0
  4 22  1  0  0  0  0
  5 23  1  0  0  0  0
  7 24  1  0  0  0  0
  9 25  1  0  0  0  0
 10 26  1  0  0  0  0
 12 27  1  0  0  0  0
 13 28  1  0  0  0  0
 14 29  1  0  0  0  0
 19 30  1  0  0  0  0
M  END
$$$$
72
  Mrv2314 01052423262D          

 27 28  0  0  0  0            999 V2000
    2.1434   -1.2375    0.0000 C   0  0  0  0  0  0  0  0  0  0  0  0
    2.8579   -1.6500    0.0000 C   0  0  0  0  0  0  0  0  0  0  0  0
    2.8579   -2.4750    0.0000 C   0  0  0  0  0  0  0  0  0  0  0  0
    2.1434   -2.8875    0.0000 C   0  0  0  0  0  0  0  0  0  0  0  0
    1.4289   -2.4750    0.0000 C   0  0  0  0  0  0  0  0  0  0  0  0
    1.4289   -1.6500    0.0000 C   0  0  0  0  0  0  0  0  0  0  0  0
    0.7145   -2.8875    0.0000 C   0  0  0  0  0  0  0  0  0  0  0  0
    0.0000   -2.4750    0.0000 C   0  0  0  0  0  0  0  0  0  0  0  0
   -0.7145   -2.8875    0.0000 C   0  0  0  0  0  0  0  0  0  0  0  0
   -1.4289   -2.4750    0.0000 C   0  0  0  0  0  0  0  0  0  0  0  0
   -1.4289   -1.6500    0.0000 C   0  0  0  0  0  0  0  0  0  0  0  0
   -0.7145   -1.2375    0.0000 C   0  0  0  0  0  0  0  0  0  0  0  0
    0.0000   -1.6500    0.0000 C   0  0  0  0  0  0  0  0  0  0  0  0
    0.7145   -1.2375    0.0000 O   0  0  0  0  0  0  0  0  0  0  0  0
    2.1434   -3.7125    0.0000 O   0  0  0  0  0  0  0  0  0  0  0  0
    2.1434   -0.4125    0.0000 H   0  0  0  0  0  0  0  0  0  0  0  0
    3.5724   -1.2375    0.0000 H   0  0  0  0  0  0  0  0  0  0  0  0
    3.5724   -2.8875    0.0000 H   0  0  0  0  0  0  0  0  0  0  0  0
    1.4289   -0.8250    0.0000 H   0  0  0  0  0  0  0  0  0  0  0  0
    0.3442   -3.6247    0.0000 H   0  0  0  0  0  0  0  0  0  0  0  0
    1.0847   -3.6247    0.0000 H   0  0  0  0  0  0  0  0  0  0  0  0
   -0.7145   -3.7125    0.0000 H   0  0  0  0  0  0  0  0  0  0  0  0
   -2.1434   -2.8875    0.0000 H   0  0  0  0  0  0  0  0  0  0  0  0
   -2.1434   -1.2375    0.0000 H   0  0  0  0  0  0  0  0  0  0  0  0
   -0.7145   -0.4125    0.0000 H   0  0  0  0  0  0  0  0  0  0  0  0
    0.3020   -0.5230    0.0000 H   0  0  0  0  0  0  0  0  0  0  0  0
    1.4289   -4.1250    0.0000 H   0  0  0  0  0  0  0  0  0  0  0  0
  1  2  4  0  0  0  0
  2  3  4  0  0  0  0
  3  4  4  0  0  0  0
  4  5  4  0  0  0  0
  5  6  4  0  0  0  0
  1  6  4  0  0  0  0
  5  7  1  0  0  0  0
  7  8  1  0  0  0  0
  8  9  4  0  0  0  0
  9 10  4  0  0  0  0
 10 11  4  0  0  0  0
 11 12  4  0  0  0  0
 12 13  4  0  0  0  0
  8 13  4  0  0  0  0
 13 14  1  0  0  0  0
  4 15  1  0  0  0  0
  1 16  1  0  0  0  0
  2 17  1  0  0  0  0
  3 18  1  0  0  0  0
  6 19  1  0  0  0  0
  7 20  1  0  0  0  0
  7 21  1  0  0  0  0
  9 22  1  0  0  0  0
 10 23  1  0  0  0  0
 11 24  1  0  0  0  0
 12 25  1  0  0  0  0
 14 26  1  0  0  0  0
 15 27  1  0  0  0  0
M  END
$$$$
73
  Mrv2314 01052423262D          

  8  7  0  0  0  0            999 V2000
    0.8250    0.0000    0.0000 C   0  0  0  0  0  0  0  0  0  0  0  0
    1.2375    0.7145    0.0000 C   0  0  0  0  0  0  0  0  0  0  0  0
    1.6500    1.4289    0.0000 F   0  0  0  0  0  0  0  0  0  0  0  0
    0.5230    1.1270    0.0000 F   0  0  0  0  0  0  0  0  0  0  0  0
    1.9520    0.3020    0.0000 F   0  0  0  0  0  0  0  0  0  0  0  0
    1.2375   -0.7145    0.0000 Cl  0  0  0  0  0  0  0  0  0  0  0  0
    0.0000    0.0000    0.0000 Cl  0  0  0  0  0  0  0  0  0  0  0  0
    1.6500   -0.0000    0.0000 H   0  0  0  0  0  0  0  0  0  0  0  0
  1  2  1  0  0  0  0
  2  3  1  0  0  0  0
  2  4  1  0  0  0  0
  2  5  1  0  0  0  0
  1  6  1  0  0  0  0
  1  7  1  0  0  0  0
  1  8  1  0  0  0  0
M  END
$$$$
74
  Mrv2314 01052423262D          

 57 58  0  0  0  0            999 V2000
    2.1434   -0.4125    0.0000 C   0  0  0  0  0  0  0  0  0  0  0  0
    2.1434   -1.2375    0.0000 C   0  0  0  0  0  0  0  0  0  0  0  0
    2.8579   -1.6500    0.0000 C   0  0  0  0  0  0  0  0  0  0  0  0
    2.8579   -2.4750    0.0000 C   0  0  0  0  0  0  0  0  0  0  0  0
    2.1434   -2.8875    0.0000 C   0  0  0  0  0  0  0  0  0  0  0  0
    1.4289   -2.4750    0.0000 C   0  0  0  0  0  0  0  0  0  0  0  0
    1.4289   -1.6500    0.0000 C   0  0  0  0  0  0  0  0  0  0  0  0
    0.7145   -2.8875    0.0000 C   0  0  0  0  0  0  0  0  0  0  0  0
    0.0000   -3.3000    0.0000 C   0  0  0  0  0  0  0  0  0  0  0  0
    1.1270   -3.6020    0.0000 C   0  0  0  0  0  0  0  0  0  0  0  0
    0.3020   -2.1730    0.0000 C   0  0  0  0  0  0  0  0  0  0  0  0
    2.1434   -3.7125    0.0000 O   0  0  0  0  0  0  0  0  0  0  0  0
    3.5724   -2.8875    0.0000 C   0  0  0  0  0  0  0  0  0  0  0  0
    3.5724   -3.7125    0.0000 C   0  0  0  0  0  0  0  0  0  0  0  0
    4.2868   -4.1250    0.0000 C   0  0  0  0  0  0  0  0  0  0  0  0
    4.2868   -4.9500    0.0000 C   0  0  0  0  0  0  0  0  0  0  0  0
    3.5724   -5.3625    0.0000 C   0  0  0  0  0  0  0  0  0  0  0  0
    2.8579   -4.9500    0.0000 C   0  0  0  0  0  0  0  0  0  0  0  0
    2.8579   -4.1250    0.0000 C   0  0  0  0  0  0  0  0  0  0  0  0
    2.1434   -5.3625    0.0000 C   0  0  0  0  0  0  0  0  0  0  0  0
    5.0013   -5.3625    0.0000 C   0  0  0  0  0  0  0  0  0  0  0  0
    5.7158   -5.7750    0.0000 C   0  0  0  0  0  0  0  0  0  0  0  0
    4.5888   -6.0770    0.0000 C   0  0  0  0  0  0  0  0  0  0  0  0
    5.4138   -4.6480    0.0000 C   0  0  0  0  0  0  0  0  0  0  0  0
    5.0013   -3.7125    0.0000 O   0  0  0  0  0  0  0  0  0  0  0  0
    2.9684   -0.4125    0.0000 H   0  0  0  0  0  0  0  0  0  0  0  0
    2.1434    0.4125    0.0000 H   0  0  0  0  0  0  0  0  0  0  0  0
    1.3184   -0.4125    0.0000 H   0  0  0  0  0  0  0  0  0  0  0  0
    3.5724   -1.2375    0.0000 H   0  0  0  0  0  0  0  0  0  0  0  0
    0.7145   -1.2375    0.0000 H   0  0  0  0  0  0  0  0  0  0  0  0
   -0.4125   -2.5855    0.0000 H   0  0  0  0  0  0  0  0  0  0  0  0
   -0.7145   -3.7125    0.0000 H   0  0  0  0  0  0  0  0  0  0  0  0
    0.4125   -4.0145    0.0000 H   0  0  0  0  0  0  0  0  0  0  0  0
    1.2347   -4.4199    0.0000 H   0  0  0  0  0  0  0  0  0  0  0  0
    1.9239   -3.8155    0.0000 H   0  0  0  0  0  0  0  0  0  0  0  0
    1.6292   -2.9475    0.0000 H   0  0  0  0  0  0  0  0  0  0  0  0
    1.1199   -2.0653    0.0000 H   0  0  0  0  0  0  0  0  0  0  0  0
    0.5155   -1.3761    0.0000 H   0  0  0  0  0  0  0  0  0  0  0  0
   -0.3525   -1.6708    0.0000 H   0  0  0  0  0  0  0  0  0  0  0  0
    2.1084   -4.5368    0.0000 H   0  0  0  0  0  0  0  0  0  0  0  0
    4.3960   -2.8395    0.0000 H   0  0  0  0  0  0  0  0  0  0  0  0
    4.0257   -2.1982    0.0000 H   0  0  0  0  0  0  0  0  0  0  0  0
    3.5724   -6.1875    0.0000 H   0  0  0  0  0  0  0  0  0  0  0  0
    2.8579   -3.3000    0.0000 H   0  0  0  0  0  0  0  0  0  0  0  0
    1.3401   -5.1744    0.0000 H   0  0  0  0  0  0  0  0  0  0  0  0
    1.7462   -6.0856    0.0000 H   0  0  0  0  0  0  0  0  0  0  0  0
    2.7329   -5.9396    0.0000 H   0  0  0  0  0  0  0  0  0  0  0  0
    5.3033   -6.4895    0.0000 H   0  0  0  0  0  0  0  0  0  0  0  0
    6.4302   -6.1875    0.0000 H   0  0  0  0  0  0  0  0  0  0  0  0
    6.1283   -5.0605    0.0000 H   0  0  0  0  0  0  0  0  0  0  0  0
    4.0866   -5.4225    0.0000 H   0  0  0  0  0  0  0  0  0  0  0  0
    3.7919   -6.2905    0.0000 H   0  0  0  0  0  0  0  0  0  0  0  0
    4.4811   -6.8949    0.0000 H   0  0  0  0  0  0  0  0  0  0  0  0
    6.0683   -4.1458    0.0000 H   0  0  0  0  0  0  0  0  0  0  0  0
    5.2003   -3.8511    0.0000 H   0  0  0  0  0  0  0  0  0  0  0  0
    4.5959   -4.5403    0.0000 H   0  0  0  0  0  0  0  0  0  0  0  0
    5.0363   -2.8882    0.0000 H   0  0  0  0  0  0  0  0  0  0  0  0
  1  2  1  0  0  0  0
  2  3  4  0  0  0  0
  3  4  4  0  0  0  0
  4  5  4  0  0  0  0
  5  6  4  0  0  0  0
  6  7  4  0  0  0  0
  2  7  4  0  0  0  0
  6  8  1  0  0  0  0
  8  9  1  0  0  0  0
  8 10  1  0  0  0  0
  8 11  1  0  0  0  0
  5 12  1  0  0  0  0
  4 13  1  0  0  0  0
 13 14  1  0  0  0  0
 14 15  4  0  0  0  0
 15 16  4  0  0  0  0
 16 17  4  0  0  0  0
 17 18  4  0  0  0  0
 18 19  4  0  0  0  0
 14 19  4  0  0  0  0
 18 20  1  0  0  0  0
 16 21  1  0  0  0  0
 21 22  1  0  0  0  0
 21 23  1  0  0  0  0
 21 24  1  0  0  0  0
 15 25  1  0  0  0  0
  1 26  1  0  0  0  0
  1 27  1  0  0  0  0
  1 28  1  0  0  0  0
  3 29  1  0  0  0  0
  7 30  1  0  0  0  0
  9 31  1  0  0  0  0
  9 32  1  0  0  0  0
  9 33  1  0  0  0  0
 10 34  1  0  0  0  0
 10 35  1  0  0  0  0
 10 36  1  0  0  0  0
 11 37  1  0  0  0  0
 11 38  1  0  0  0  0
 11 39  1  0  0  0  0
 12 40  1  0  0  0  0
 13 41  1  0  0  0  0
 13 42  1  0  0  0  0
 17 43  1  0  0  0  0
 19 44  1  0  0  0  0
 20 45  1  0  0  0  0
 20 46  1  0  0  0  0
 20 47  1  0  0  0  0
 22 48  1  0  0  0  0
 22 49  1  0  0  0  0
 22 50  1  0  0  0  0
 23 51  1  0  0  0  0
 23 52  1  0  0  0  0
 23 53  1  0  0  0  0
 24 54  1  0  0  0  0
 24 55  1  0  0  0  0
 24 56  1  0  0  0  0
 25 57  1  0  0  0  0
M  END
$$$$
75
  Mrv2314 01052423262D          

 63 64  0  0  0  0            999 V2000
   -1.4289   -0.0000    0.0000 C   0  0  0  0  0  0  0  0  0  0  0  0
   -0.7145   -0.4125    0.0000 C   0  0  0  0  0  0  0  0  0  0  0  0
   -0.7145   -1.2375    0.0000 C   0  0  0  0  0  0  0  0  0  0  0  0
    0.0000   -1.6500    0.0000 C   0  0  0  0  0  0  0  0  0  0  0  0
    0.0000   -2.4750    0.0000 C   0  0  0  0  0  0  0  0  0  0  0  0
   -0.7145   -2.8875    0.0000 C   0  0  0  0  0  0  0  0  0  0  0  0
   -1.4289   -2.4750    0.0000 C   0  0  0  0  0  0  0  0  0  0  0  0
   -1.4289   -1.6500    0.0000 C   0  0  0  0  0  0  0  0  0  0  0  0
   -2.1434   -2.8875    0.0000 C   0  0  0  0  0  0  0  0  0  0  0  0
   -2.8579   -3.3000    0.0000 C   0  0  0  0  0  0  0  0  0  0  0  0
   -2.5559   -2.1730    0.0000 C   0  0  0  0  0  0  0  0  0  0  0  0
   -1.7309   -3.6020    0.0000 C   0  0  0  0  0  0  0  0  0  0  0  0
   -0.7145   -3.7125    0.0000 O   0  0  0  0  0  0  0  0  0  0  0  0
    0.7145   -2.8875    0.0000 C   0  0  0  0  0  0  0  0  0  0  0  0
    1.4289   -2.4750    0.0000 C   0  0  0  0  0  0  0  0  0  0  0  0
    1.4289   -1.6500    0.0000 C   0  0  0  0  0  0  0  0  0  0  0  0
    2.1434   -1.2375    0.0000 C   0  0  0  0  0  0  0  0  0  0  0  0
    2.8579   -1.6500    0.0000 C   0  0  0  0  0  0  0  0  0  0  0  0
    2.8579   -2.4750    0.0000 C   0  0  0  0  0  0  0  0  0  0  0  0
    2.1434   -2.8875    0.0000 C   0  0  0  0  0  0  0  0  0  0  0  0
    3.5724   -2.8875    0.0000 C   0  0  0  0  0  0  0  0  0  0  0  0
    4.2868   -2.4750    0.0000 C   0  0  0  0  0  0  0  0  0  0  0  0
    2.1434   -0.4125    0.0000 C   0  0  0  0  0  0  0  0  0  0  0  0
    2.1434    0.4125    0.0000 C   0  0  0  0  0  0  0  0  0  0  0  0
    2.9684   -0.4125    0.0000 C   0  0  0  0  0  0  0  0  0  0  0  0
    1.3184   -0.4125    0.0000 C   0  0  0  0  0  0  0  0  0  0  0  0
    0.7145   -1.2375    0.0000 O   0  0  0  0  0  0  0  0  0  0  0  0
   -1.0164    0.7145    0.0000 H   0  0  0  0  0  0  0  0  0  0  0  0
   -2.1434    0.4125    0.0000 H   0  0  0  0  0  0  0  0  0  0  0  0
   -1.8414   -0.7145    0.0000 H   0  0  0  0  0  0  0  0  0  0  0  0
    0.1091   -0.3645    0.0000 H   0  0  0  0  0  0  0  0  0  0  0  0
   -0.2611    0.2768    0.0000 H   0  0  0  0  0  0  0  0  0  0  0  0
    0.0000   -0.8250    0.0000 H   0  0  0  0  0  0  0  0  0  0  0  0
   -2.1434   -1.2375    0.0000 H   0  0  0  0  0  0  0  0  0  0  0  0
   -3.2704   -2.5855    0.0000 H   0  0  0  0  0  0  0  0  0  0  0  0
   -3.5724   -3.7125    0.0000 H   0  0  0  0  0  0  0  0  0  0  0  0
   -2.4454   -4.0145    0.0000 H   0  0  0  0  0  0  0  0  0  0  0  0
   -1.7380   -2.0653    0.0000 H   0  0  0  0  0  0  0  0  0  0  0  0
   -2.3424   -1.3761    0.0000 H   0  0  0  0  0  0  0  0  0  0  0  0
   -3.2104   -1.6708    0.0000 H   0  0  0  0  0  0  0  0  0  0  0  0
   -1.6232   -4.4199    0.0000 H   0  0  0  0  0  0  0  0  0  0  0  0
   -0.9340   -3.8155    0.0000 H   0  0  0  0  0  0  0  0  0  0  0  0
   -1.2287   -2.9475    0.0000 H   0  0  0  0  0  0  0  0  0  0  0  0
   -0.0182   -4.1550    0.0000 H   0  0  0  0  0  0  0  0  0  0  0  0
    0.3442   -3.6247    0.0000 H   0  0  0  0  0  0  0  0  0  0  0  0
    1.0847   -3.6247    0.0000 H   0  0  0  0  0  0  0  0  0  0  0  0
    3.5724   -1.2375    0.0000 H   0  0  0  0  0  0  0  0  0  0  0  0
    2.1434   -3.7125    0.0000 H   0  0  0  0  0  0  0  0  0  0  0  0
    3.2021   -3.6247    0.0000 H   0  0  0  0  0  0  0  0  0  0  0  0
    3.9426   -3.6247    0.0000 H   0  0  0  0  0  0  0  0  0  0  0  0
    4.6993   -3.1895    0.0000 H   0  0  0  0  0  0  0  0  0  0  0  0
    5.0013   -2.0625    0.0000 H   0  0  0  0  0  0  0  0  0  0  0  0
    3.8743   -1.7605    0.0000 H   0  0  0  0  0  0  0  0  0  0  0  0
    2.9684    0.4125    0.0000 H   0  0  0  0  0  0  0  0  0  0  0  0
    2.1434    1.2375    0.0000 H   0  0  0  0  0  0  0  0  0  0  0  0
    1.3184    0.4125    0.0000 H   0  0  0  0  0  0  0  0  0  0  0  0
    2.6527   -1.1747    0.0000 H   0  0  0  0  0  0  0  0  0  0  0  0
    3.5518   -0.9959    0.0000 H   0  0  0  0  0  0  0  0  0  0  0  0
    3.7306   -0.0968    0.0000 H   0  0  0  0  0  0  0  0  0  0  0  0
    0.5562   -0.0968    0.0000 H   0  0  0  0  0  0  0  0  0  0  0  0
    0.7350   -0.9959    0.0000 H   0  0  0  0  0  0  0  0  0  0  0  0
    1.6341   -1.1747    0.0000 H   0  0  0  0  0  0  0  0  0  0  0  0
    0.7145   -2.0625    0.0000 H   0  0  0  0  0  0  0  0  0  0  0  0
  1  2  1  0  0  0  0
  2  3  1  0  0  0  0
  3  4  4  0  0  0  0
  4  5  4  0  0  0  0
  5  6  4  0  0  0  0
  6  7  4  0  0  0  0
  7  8  4  0  0  0  0
  3  8  4  0  0  0  0
  7  9  1  0  0  0  0
  9 10  1  0  0  0  0
  9 11  1  0  0  0  0
  9 12  1  0  0  0  0
  6 13  1  0  0  0  0
  5 14  1  0  0  0  0
 14 15  1  0  0  0  0
 15 16  4  0  0  0  0
 16 17  4  0  0  0  0
 17 18  4  0  0  0  0
 18 19  4  0  0  0  0
 19 20  4  0  0  0  0
 15 20  4  0  0  0  0
 19 21  1  0  0  0  0
 21 22  1  0  0  0  0
 17 23  1  0  0  0  0
 23 24  1  0  0  0  0
 23 25  1  0  0  0  0
 23 26  1  0  0  0  0
 16 27  1  0  0  0  0
  1 28  1  0  0  0  0
  1 29  1  0  0  0  0
  1 30  1  0  0  0  0
  2 31  1  0  0  0  0
  2 32  1  0  0  0  0
  4 33  1  0  0  0  0
  8 34  1  0  0  0  0
 10 35  1  0  0  0  0
 10 36  1  0  0  0  0
 10 37  1  0  0  0  0
 11 38  1  0  0  0  0
 11 39  1  0  0  0  0
 11 40  1  0  0  0  0
 12 41  1  0  0  0  0
 12 42  1  0  0  0  0
 12 43  1  0  0  0  0
 13 44  1  0  0  0  0
 14 45  1  0  0  0  0
 14 46  1  0  0  0  0
 18 47  1  0  0  0  0
 20 48  1  0  0  0  0
 21 49  1  0  0  0  0
 21 50  1  0  0  0  0
 22 51  1  0  0  0  0
 22 52  1  0  0  0  0
 22 53  1  0  0  0  0
 24 54  1  0  0  0  0
 24 55  1  0  0  0  0
 24 56  1  0  0  0  0
 25 57  1  0  0  0  0
 25 58  1  0  0  0  0
 25 59  1  0  0  0  0
 26 60  1  0  0  0  0
 26 61  1  0  0  0  0
 26 62  1  0  0  0  0
 27 63  1  0  0  0  0
M  END
$$$$
76
  Mrv2314 01052423262D          

 27 28  0  0  0  0            999 V2000
    2.1434   -1.2375    0.0000 C   0  0  0  0  0  0  0  0  0  0  0  0
    2.8579   -1.6500    0.0000 C   0  0  0  0  0  0  0  0  0  0  0  0
    2.8579   -2.4750    0.0000 C   0  0  0  0  0  0  0  0  0  0  0  0
    2.1434   -2.8875    0.0000 C   0  0  0  0  0  0  0  0  0  0  0  0
    1.4289   -2.4750    0.0000 C   0  0  0  0  0  0  0  0  0  0  0  0
    1.4289   -1.6500    0.0000 C   0  0  0  0  0  0  0  0  0  0  0  0
    2.1434   -3.7125    0.0000 C   0  0  0  0  0  0  0  0  0  0  0  0
    2.8579   -4.1250    0.0000 O   0  0  0  0  0  0  0  0  0  0  0  0
    1.4289   -4.1250    0.0000 C   0  0  0  0  0  0  0  0  0  0  0  0
    1.4289   -4.9500    0.0000 C   0  0  0  0  0  0  0  0  0  0  0  0
    0.7145   -5.3625    0.0000 C   0  0  0  0  0  0  0  0  0  0  0  0
   -0.0000   -4.9500    0.0000 C   0  0  0  0  0  0  0  0  0  0  0  0
    0.0000   -4.1250    0.0000 C   0  0  0  0  0  0  0  0  0  0  0  0
    0.7145   -3.7125    0.0000 C   0  0  0  0  0  0  0  0  0  0  0  0
   -0.7145   -5.3625    0.0000 O   0  0  0  0  0  0  0  0  0  0  0  0
    0.7145   -6.1875    0.0000 O   0  0  0  0  0  0  0  0  0  0  0  0
    2.1434   -5.3625    0.0000 O   0  0  0  0  0  0  0  0  0  0  0  0
    2.1434   -0.4125    0.0000 H   0  0  0  0  0  0  0  0  0  0  0  0
    3.5724   -1.2375    0.0000 H   0  0  0  0  0  0  0  0  0  0  0  0
    3.5724   -2.8875    0.0000 H   0  0  0  0  0  0  0  0  0  0  0  0
    0.7145   -2.8875    0.0000 H   0  0  0  0  0  0  0  0  0  0  0  0
    0.7145   -1.2375    0.0000 H   0  0  0  0  0  0  0  0  0  0  0  0
   -0.7145   -3.7125    0.0000 H   0  0  0  0  0  0  0  0  0  0  0  0
    1.4289   -3.3000    0.0000 H   0  0  0  0  0  0  0  0  0  0  0  0
   -1.4289   -4.9500    0.0000 H   0  0  0  0  0  0  0  0  0  0  0  0
   -0.0000   -6.6000    0.0000 H   0  0  0  0  0  0  0  0  0  0  0  0
    2.1434   -6.1875    0.0000 H   0  0  0  0  0  0  0  0  0  0  0  0
  1  2  4  0  0  0  0
  2  3  4  0  0  0  0
  3  4  4  0  0  0  0
  4  5  4  0  0  0  0
  5  6  4  0  0  0  0
  1  6  4  0  0  0  0
  4  7  1  0  0  0  0
  7  8  2  0  0  0  0
  7  9  1  0  0  0  0
  9 10  4  0  0  0  0
 10 11  4  0  0  0  0
 11 12  4  0  0  0  0
 12 13  4  0  0  0  0
 13 14  4  0  0  0  0
  9 14  4  0  0  0  0
 12 15  1  0  0  0  0
 11 16  1  0  0  0  0
 10 17  1  0  0  0  0
  1 18  1  0  0  0  0
  2 19  1  0  0  0  0
  3 20  1  0  0  0  0
  5 21  1  0  0  0  0
  6 22  1  0  0  0  0
 13 23  1  0  0  0  0
 14 24  1  0  0  0  0
 15 25  1  0  0  0  0
 16 26  1  0  0  0  0
 17 27  1  0  0  0  0
M  END
$$$$
77
  Mrv2314 01052423262D          

 22 22  0  0  0  0            999 V2000
    0.7145    2.0625    0.0000 C   0  0  0  0  0  0  0  0  0  0  0  0
    0.7145    1.2375    0.0000 C   0  0  0  0  0  0  0  0  0  0  0  0
    1.4289    0.8250    0.0000 C   0  0  0  0  0  0  0  0  0  0  0  0
    1.4289   -0.0000    0.0000 C   0  0  0  0  0  0  0  0  0  0  0  0
    0.7145   -0.4125    0.0000 C   0  0  0  0  0  0  0  0  0  0  0  0
    0.0000    0.0000    0.0000 C   0  0  0  0  0  0  0  0  0  0  0  0
    0.0000    0.8250    0.0000 C   0  0  0  0  0  0  0  0  0  0  0  0
    0.7145   -1.2375    0.0000 C   0  0  0  0  0  0  0  0  0  0  0  0
    2.1434   -0.4125    0.0000 O   0  0  0  0  0  0  0  0  0  0  0  0
    2.1434    1.2375    0.0000 C   0  0  0  0  0  0  0  0  0  0  0  0
    1.5395    2.0625    0.0000 H   0  0  0  0  0  0  0  0  0  0  0  0
    0.7145    2.8875    0.0000 H   0  0  0  0  0  0  0  0  0  0  0  0
   -0.1105    2.0625    0.0000 H   0  0  0  0  0  0  0  0  0  0  0  0
   -0.7145   -0.4125    0.0000 H   0  0  0  0  0  0  0  0  0  0  0  0
   -0.7145    1.2375    0.0000 H   0  0  0  0  0  0  0  0  0  0  0  0
   -0.1105   -1.2375    0.0000 H   0  0  0  0  0  0  0  0  0  0  0  0
    0.7145   -2.0625    0.0000 H   0  0  0  0  0  0  0  0  0  0  0  0
    1.5395   -1.2375    0.0000 H   0  0  0  0  0  0  0  0  0  0  0  0
    2.1434   -1.2375    0.0000 H   0  0  0  0  0  0  0  0  0  0  0  0
    2.5559    0.5230    0.0000 H   0  0  0  0  0  0  0  0  0  0  0  0
    2.8579    1.6500    0.0000 H   0  0  0  0  0  0  0  0  0  0  0  0
    1.7309    1.9520    0.0000 H   0  0  0  0  0  0  0  0  0  0  0  0
  1  2  1  0  0  0  0
  2  3  4  0  0  0  0
  3  4  4  0  0  0  0
  4  5  4  0  0  0  0
  5  6  4  0  0  0  0
  6  7  4  0  0  0  0
  2  7  4  0  0  0  0
  5  8  1  0  0  0  0
  4  9  1  0  0  0  0
  3 10  1  0  0  0  0
  1 11  1  0  0  0  0
  1 12  1  0  0  0  0
  1 13  1  0  0  0  0
  6 14  1  0  0  0  0
  7 15  1  0  0  0  0
  8 16  1  0  0  0  0
  8 17  1  0  0  0  0
  8 18  1  0  0  0  0
  9 19  1  0  0  0  0
 10 20  1  0  0  0  0
 10 21  1  0  0  0  0
 10 22  1  0  0  0  0
M  END
$$$$
78
  Mrv2314 01052423262D          

 24 25  0  0  0  0            999 V2000
   -1.2415   -0.1459    0.0000 C   0  0  0  0  0  0  0  0  0  0  0  0
   -0.6284   -0.6979    0.0000 C   0  0  0  0  0  0  0  0  0  0  0  0
   -0.1435   -1.3654    0.0000 C   0  0  0  0  0  0  0  0  0  0  0  0
    0.6411   -1.1104    0.0000 C   0  0  0  0  0  0  0  0  0  0  0  0
    0.6411   -0.2854    0.0000 C   0  0  0  0  0  0  0  0  0  0  0  0
   -0.1435   -0.0305    0.0000 O   0  0  0  0  0  0  0  0  0  0  0  0
    1.3556    0.1271    0.0000 C   0  0  0  0  0  0  0  0  0  0  0  0
    2.0701   -0.2854    0.0000 C   0  0  0  0  0  0  0  0  0  0  0  0
    2.0701   -1.1104    0.0000 C   0  0  0  0  0  0  0  0  0  0  0  0
    1.3556   -1.5229    0.0000 C   0  0  0  0  0  0  0  0  0  0  0  0
    1.3556    0.9521    0.0000 O   0  0  0  0  0  0  0  0  0  0  0  0
   -1.2415   -1.2500    0.0000 C   0  0  0  0  0  0  0  0  0  0  0  0
   -0.6895    0.4672    0.0000 H   0  0  0  0  0  0  0  0  0  0  0  0
   -1.8546    0.4061    0.0000 H   0  0  0  0  0  0  0  0  0  0  0  0
   -1.7936   -0.7590    0.0000 H   0  0  0  0  0  0  0  0  0  0  0  0
   -0.7370   -1.9385    0.0000 H   0  0  0  0  0  0  0  0  0  0  0  0
   -0.0002   -2.1778    0.0000 H   0  0  0  0  0  0  0  0  0  0  0  0
    2.7845    0.1271    0.0000 H   0  0  0  0  0  0  0  0  0  0  0  0
    2.7845   -1.5229    0.0000 H   0  0  0  0  0  0  0  0  0  0  0  0
    1.3556   -2.3479    0.0000 H   0  0  0  0  0  0  0  0  0  0  0  0
    2.0701    1.3646    0.0000 H   0  0  0  0  0  0  0  0  0  0  0  0
   -2.0665   -1.2546    0.0000 H   0  0  0  0  0  0  0  0  0  0  0  0
   -1.8518   -1.8051    0.0000 H   0  0  0  0  0  0  0  0  0  0  0  0
   -1.3240   -2.0708    0.0000 H   0  0  0  0  0  0  0  0  0  0  0  0
  1  2  1  0  0  0  0
  2  3  1  0  0  0  0
  3  4  1  0  0  0  0
  4  5  4  0  0  0  0
  5  6  1  0  0  0  0
  2  6  1  0  0  0  0
  5  7  4  0  0  0  0
  7  8  4  0  0  0  0
  8  9  4  0  0  0  0
  9 10  4  0  0  0  0
  4 10  4  0  0  0  0
  7 11  1  0  0  0  0
  2 12  1  0  0  0  0
  1 13  1  0  0  0  0
  1 14  1  0  0  0  0
  1 15  1  0  0  0  0
  3 16  1  0  0  0  0
  3 17  1  0  0  0  0
  8 18  1  0  0  0  0
  9 19  1  0  0  0  0
 10 20  1  0  0  0  0
 11 21  1  0  0  0  0
 12 22  1  0  0  0  0
 12 23  1  0  0  0  0
 12 24  1  0  0  0  0
M  END
$$$$
79
  Mrv2314 01052423262D          

 27 28  0  0  0  0            999 V2000
    2.1434   -1.2375    0.0000 C   0  0  0  0  0  0  0  0  0  0  0  0
    2.8579   -1.6500    0.0000 C   0  0  0  0  0  0  0  0  0  0  0  0
    2.8579   -2.4750    0.0000 C   0  0  0  0  0  0  0  0  0  0  0  0
    2.1434   -2.8875    0.0000 C   0  0  0  0  0  0  0  0  0  0  0  0
    1.4289   -2.4750    0.0000 C   0  0  0  0  0  0  0  0  0  0  0  0
    1.4289   -1.6500    0.0000 C   0  0  0  0  0  0  0  0  0  0  0  0
    0.7145   -1.2375    0.0000 C   0  0  0  0  0  0  0  0  0  0  0  0
    0.0000   -1.6500    0.0000 O   0  0  0  0  0  0  0  0  0  0  0  0
    0.7145   -0.4125    0.0000 C   0  0  0  0  0  0  0  0  0  0  0  0
    0.0000    0.0000    0.0000 C   0  0  0  0  0  0  0  0  0  0  0  0
    0.0000    0.8250    0.0000 C   0  0  0  0  0  0  0  0  0  0  0  0
    0.7145    1.2375    0.0000 C   0  0  0  0  0  0  0  0  0  0  0  0
    1.4289    0.8250    0.0000 C   0  0  0  0  0  0  0  0  0  0  0  0
    1.4289    0.0000    0.0000 C   0  0  0  0  0  0  0  0  0  0  0  0
    0.7145    2.0625    0.0000 O   0  0  0  0  0  0  0  0  0  0  0  0
   -0.7145   -0.4125    0.0000 O   0  0  0  0  0  0  0  0  0  0  0  0
    3.5724   -2.8875    0.0000 O   0  0  0  0  0  0  0  0  0  0  0  0
    2.1434   -0.4125    0.0000 H   0  0  0  0  0  0  0  0  0  0  0  0
    3.5724   -1.2375    0.0000 H   0  0  0  0  0  0  0  0  0  0  0  0
    2.1434   -3.7125    0.0000 H   0  0  0  0  0  0  0  0  0  0  0  0
    0.7145   -2.8875    0.0000 H   0  0  0  0  0  0  0  0  0  0  0  0
   -0.7145    1.2375    0.0000 H   0  0  0  0  0  0  0  0  0  0  0  0
    2.1434    1.2375    0.0000 H   0  0  0  0  0  0  0  0  0  0  0  0
    1.4289   -0.8250    0.0000 H   0  0  0  0  0  0  0  0  0  0  0  0
    1.4289    2.4750    0.0000 H   0  0  0  0  0  0  0  0  0  0  0  0
   -1.4289    0.0000    0.0000 H   0  0  0  0  0  0  0  0  0  0  0  0
    3.5724   -3.7125    0.0000 H   0  0  0  0  0  0  0  0  0  0  0  0
  1  2  4  0  0  0  0
  2  3  4  0  0  0  0
  3  4  4  0  0  0  0
  4  5  4  0  0  0  0
  5  6  4  0  0  0  0
  1  6  4  0  0  0  0
  6  7  1  0  0  0  0
  7  8  2  0  0  0  0
  7  9  1  0  0  0  0
  9 10  4  0  0  0  0
 10 11  4  0  0  0  0
 11 12  4  0  0  0  0
 12 13  4  0  0  0  0
 13 14  4  0  0  0  0
  9 14  4  0  0  0  0
 12 15  1  0  0  0  0
 10 16  1  0  0  0  0
  3 17  1  0  0  0  0
  1 18  1  0  0  0  0
  2 19  1  0  0  0  0
  4 20  1  0  0  0  0
  5 21  1  0  0  0  0
 11 22  1  0  0  0  0
 13 23  1  0  0  0  0
 14 24  1  0  0  0  0
 15 25  1  0  0  0  0
 16 26  1  0  0  0  0
 17 27  1  0  0  0  0
M  END
$$$$
80
  Mrv2314 01052423262D          

 37 41  0  0  0  0            999 V2000
    6.2233   -2.2343    0.0000 C   0  0  0  0  0  0  0  0  0  0  0  0
    5.9686   -1.4496    0.0000 C   0  0  0  0  0  0  0  0  0  0  0  0
    5.1616   -1.2778    0.0000 C   0  0  0  0  0  0  0  0  0  0  0  0
    4.6094   -1.8907    0.0000 C   0  0  0  0  0  0  0  0  0  0  0  0
    4.8641   -2.6754    0.0000 C   0  0  0  0  0  0  0  0  0  0  0  0
    5.6711   -2.8472    0.0000 C   0  0  0  0  0  0  0  0  0  0  0  0
    4.1966   -3.1602    0.0000 C   0  0  0  0  0  0  0  0  0  0  0  0
    4.1963   -3.9852    0.0000 O   0  0  0  0  0  0  0  0  0  0  0  0
    3.5293   -2.6750    0.0000 O   0  0  0  0  0  0  0  0  0  0  0  0
    3.7844   -1.8905    0.0000 C   0  0  0  0  0  0  0  0  0  0  0  0
    2.9639   -1.9765    0.0000 C   0  0  0  0  0  0  0  0  0  0  0  0
    2.6281   -2.7301    0.0000 C   0  0  0  0  0  0  0  0  0  0  0  0
    1.8076   -2.8161    0.0000 C   0  0  0  0  0  0  0  0  0  0  0  0
    1.3229   -2.1485    0.0000 C   0  0  0  0  0  0  0  0  0  0  0  0
    1.6587   -1.3949    0.0000 C   0  0  0  0  0  0  0  0  0  0  0  0
    2.4792   -1.3089    0.0000 C   0  0  0  0  0  0  0  0  0  0  0  0
    2.8150   -0.5553    0.0000 O   0  0  0  0  0  0  0  0  0  0  0  0
    3.6355   -0.4693    0.0000 C   0  0  0  0  0  0  0  0  0  0  0  0
    3.9712    0.2842    0.0000 C   0  0  0  0  0  0  0  0  0  0  0  0
    4.7917    0.3702    0.0000 C   0  0  0  0  0  0  0  0  0  0  0  0
    5.2765   -0.2973    0.0000 C   0  0  0  0  0  0  0  0  0  0  0  0
    4.9407   -1.0509    0.0000 C   0  0  0  0  0  0  0  0  0  0  0  0
    4.1202   -1.1369    0.0000 C   0  0  0  0  0  0  0  0  0  0  0  0
    6.0970   -0.2113    0.0000 Br  0  0  0  0  0  0  0  0  0  0  0  0
    5.1275    1.1238    0.0000 O   0  0  0  0  0  0  0  0  0  0  0  0
    3.4865    0.9518    0.0000 Br  0  0  0  0  0  0  0  0  0  0  0  0
    1.1740   -0.7273    0.0000 Br  0  0  0  0  0  0  0  0  0  0  0  0
    0.5024   -2.2345    0.0000 O   0  0  0  0  0  0  0  0  0  0  0  0
    1.4719   -3.5697    0.0000 Br  0  0  0  0  0  0  0  0  0  0  0  0
    7.0302   -2.4060    0.0000 H   0  0  0  0  0  0  0  0  0  0  0  0
    6.5208   -0.8366    0.0000 H   0  0  0  0  0  0  0  0  0  0  0  0
    5.5602   -0.5555    0.0000 H   0  0  0  0  0  0  0  0  0  0  0  0
    5.9258   -3.6319    0.0000 H   0  0  0  0  0  0  0  0  0  0  0  0
    2.6963   -3.5523    0.0000 H   0  0  0  0  0  0  0  0  0  0  0  0
    4.4560   -0.3833    0.0000 H   0  0  0  0  0  0  0  0  0  0  0  0
    5.9480    1.2098    0.0000 H   0  0  0  0  0  0  0  0  0  0  0  0
    0.0177   -1.5669    0.0000 H   0  0  0  0  0  0  0  0  0  0  0  0
  1  2  4  0  0  0  0
  2  3  4  0  0  0  0
  3  4  4  0  0  0  0
  4  5  4  0  0  0  0
  5  6  4  0  0  0  0
  1  6  4  0  0  0  0
  5  7  1  0  0  0  0
  7  8  2  0  0  0  0
  7  9  1  0  0  0  0
  9 10  1  0  0  0  0
  4 10  1  0  0  0  0
 10 11  1  0  0  0  0
 11 12  4  0  0  0  0
 12 13  4  0  0  0  0
 13 14  4  0  0  0  0
 14 15  4  0  0  0  0
 15 16  4  0  0  0  0
 11 16  4  0  0  0  0
 16 17  1  0  0  0  0
 17 18  1  0  0  0  0
 18 19  4  0  0  0  0
 19 20  4  0  0  0  0
 20 21  4  0  0  0  0
 21 22  4  0  0  0  0
 22 23  4  0  0  0  0
 10 23  1  0  0  0  0
 18 23  4  0  0  0  0
 21 24  1  0  0  0  0
 20 25  1  0  0  0  0
 19 26  1  0  0  0  0
 15 27  1  0  0  0  0
 14 28  1  0  0  0  0
 13 29  1  0  0  0  0
  1 30  1  0  0  0  0
  2 31  1  0  0  0  0
  3 32  1  0  0  0  0
  6 33  1  0  0  0  0
 12 34  1  0  0  0  0
 22 35  1  0  0  0  0
 25 36  1  0  0  0  0
 28 37  1  0  0  0  0
M  END
$$$$
81
  Mrv2314 01052423262D          

 13 13  0  0  0  0            999 V2000
    0.7145    1.2375    0.0000 C   0  0  0  0  0  0  0  0  0  0  0  0
    1.4289    0.8250    0.0000 C   0  0  0  0  0  0  0  0  0  0  0  0
    1.4289   -0.0000    0.0000 C   0  0  0  0  0  0  0  0  0  0  0  0
    0.7145   -0.4125    0.0000 C   0  0  0  0  0  0  0  0  0  0  0  0
    0.0000    0.0000    0.0000 C   0  0  0  0  0  0  0  0  0  0  0  0
    0.0000    0.8250    0.0000 C   0  0  0  0  0  0  0  0  0  0  0  0
   -0.7145    1.2375    0.0000 Cl  0  0  0  0  0  0  0  0  0  0  0  0
   -0.7145   -0.4125    0.0000 Cl  0  0  0  0  0  0  0  0  0  0  0  0
    2.1434   -0.4125    0.0000 Cl  0  0  0  0  0  0  0  0  0  0  0  0
    2.1434    1.2375    0.0000 O   0  0  0  0  0  0  0  0  0  0  0  0
    0.7145    2.0625    0.0000 H   0  0  0  0  0  0  0  0  0  0  0  0
    0.7145   -1.2375    0.0000 H   0  0  0  0  0  0  0  0  0  0  0  0
    2.8579    0.8250    0.0000 H   0  0  0  0  0  0  0  0  0  0  0  0
  1  2  4  0  0  0  0
  2  3  4  0  0  0  0
  3  4  4  0  0  0  0
  4  5  4  0  0  0  0
  5  6  4  0  0  0  0
  1  6  4  0  0  0  0
  6  7  1  0  0  0  0
  5  8  1  0  0  0  0
  3  9  1  0  0  0  0
  2 10  1  0  0  0  0
  1 11  1  0  0  0  0
  4 12  1  0  0  0  0
 10 13  1  0  0  0  0
M  END
$$$$
82
  Mrv2314 01052423262D          

 19 19  0  0  0  0            999 V2000
    0.7145    1.2375    0.0000 C   0  0  0  0  0  0  0  0  0  0  0  0
    1.4289    0.8250    0.0000 C   0  0  0  0  0  0  0  0  0  0  0  0
    1.4289   -0.0000    0.0000 C   0  0  0  0  0  0  0  0  0  0  0  0
    0.7145   -0.4125    0.0000 C   0  0  0  0  0  0  0  0  0  0  0  0
    0.0000    0.0000    0.0000 C   0  0  0  0  0  0  0  0  0  0  0  0
    0.0000    0.8250    0.0000 C   0  0  0  0  0  0  0  0  0  0  0  0
   -0.7145    1.2375    0.0000 Cl  0  0  0  0  0  0  0  0  0  0  0  0
   -0.7145   -0.4125    0.0000 Cl  0  0  0  0  0  0  0  0  0  0  0  0
    2.1434   -0.4125    0.0000 Cl  0  0  0  0  0  0  0  0  0  0  0  0
    2.1434    1.2375    0.0000 O   0  0  0  0  0  0  0  0  0  0  0  0
    2.1434    2.0625    0.0000 C   0  0  0  0  0  0  0  0  0  0  0  0
    2.8579    2.4750    0.0000 C   0  0  0  0  0  0  0  0  0  0  0  0
    2.8579    3.3000    0.0000 O   0  0  0  0  0  0  0  0  0  0  0  0
    3.5724    2.0625    0.0000 O   0  0  0  0  0  0  0  0  0  0  0  0
    0.7145    2.0625    0.0000 H   0  0  0  0  0  0  0  0  0  0  0  0
    0.7145   -1.2375    0.0000 H   0  0  0  0  0  0  0  0  0  0  0  0
    1.6901    2.7518    0.0000 H   0  0  0  0  0  0  0  0  0  0  0  0
    1.3198    2.1105    0.0000 H   0  0  0  0  0  0  0  0  0  0  0  0
    3.5724    1.2375    0.0000 H   0  0  0  0  0  0  0  0  0  0  0  0
  1  2  4  0  0  0  0
  2  3  4  0  0  0  0
  3  4  4  0  0  0  0
  4  5  4  0  0  0  0
  5  6  4  0  0  0  0
  1  6  4  0  0  0  0
  6  7  1  0  0  0  0
  5  8  1  0  0  0  0
  3  9  1  0  0  0  0
  2 10  1  0  0  0  0
 10 11  1  0  0  0  0
 11 12  1  0  0  0  0
 12 13  2  0  0  0  0
 12 14  1  0  0  0  0
  1 15  1  0  0  0  0
  4 16  1  0  0  0  0
 11 17  1  0  0  0  0
 11 18  1  0  0  0  0
 14 19  1  0  0  0  0
M  END
$$$$
83
  Mrv2314 01052423262D          

 13 13  0  0  0  0            999 V2000
    0.7145    1.2375    0.0000 C   0  0  0  0  0  0  0  0  0  0  0  0
    1.4289    0.8250    0.0000 C   0  0  0  0  0  0  0  0  0  0  0  0
    1.4289   -0.0000    0.0000 C   0  0  0  0  0  0  0  0  0  0  0  0
    0.7145   -0.4125    0.0000 C   0  0  0  0  0  0  0  0  0  0  0  0
    0.0000    0.0000    0.0000 C   0  0  0  0  0  0  0  0  0  0  0  0
    0.0000    0.8250    0.0000 C   0  0  0  0  0  0  0  0  0  0  0  0
   -0.7145    1.2375    0.0000 Cl  0  0  0  0  0  0  0  0  0  0  0  0
   -0.7145   -0.4125    0.0000 O   0  0  0  0  0  0  0  0  0  0  0  0
    0.7145   -1.2375    0.0000 Cl  0  0  0  0  0  0  0  0  0  0  0  0
    2.1434    1.2375    0.0000 Cl  0  0  0  0  0  0  0  0  0  0  0  0
    0.7145    2.0625    0.0000 H   0  0  0  0  0  0  0  0  0  0  0  0
    2.1434   -0.4125    0.0000 H   0  0  0  0  0  0  0  0  0  0  0  0
   -1.4289    0.0000    0.0000 H   0  0  0  0  0  0  0  0  0  0  0  0
  1  2  4  0  0  0  0
  2  3  4  0  0  0  0
  3  4  4  0  0  0  0
  4  5  4  0  0  0  0
  5  6  4  0  0  0  0
  1  6  4  0  0  0  0
  6  7  1  0  0  0  0
  5  8  1  0  0  0  0
  4  9  1  0  0  0  0
  2 10  1  0  0  0  0
  1 11  1  0  0  0  0
  3 12  1  0  0  0  0
  8 13  1  0  0  0  0
M  END
$$$$
84
  Mrv2314 01052423262D          

 22 22  0  0  0  0            999 V2000
    0.7145    2.0625    0.0000 C   0  0  0  0  0  0  0  0  0  0  0  0
    0.7145    1.2375    0.0000 C   0  0  0  0  0  0  0  0  0  0  0  0
    1.4289    0.8250    0.0000 C   0  0  0  0  0  0  0  0  0  0  0  0
    1.4289   -0.0000    0.0000 C   0  0  0  0  0  0  0  0  0  0  0  0
    0.7145   -0.4125    0.0000 C   0  0  0  0  0  0  0  0  0  0  0  0
    0.0000    0.0000    0.0000 C   0  0  0  0  0  0  0  0  0  0  0  0
    0.0000    0.8250    0.0000 C   0  0  0  0  0  0  0  0  0  0  0  0
   -0.7145   -0.4125    0.0000 C   0  0  0  0  0  0  0  0  0  0  0  0
    0.7145   -1.2375    0.0000 O   0  0  0  0  0  0  0  0  0  0  0  0
    2.1434   -0.4125    0.0000 C   0  0  0  0  0  0  0  0  0  0  0  0
    1.5395    2.0625    0.0000 H   0  0  0  0  0  0  0  0  0  0  0  0
    0.7145    2.8875    0.0000 H   0  0  0  0  0  0  0  0  0  0  0  0
   -0.1105    2.0625    0.0000 H   0  0  0  0  0  0  0  0  0  0  0  0
    2.1434    1.2375    0.0000 H   0  0  0  0  0  0  0  0  0  0  0  0
   -0.7145    1.2375    0.0000 H   0  0  0  0  0  0  0  0  0  0  0  0
   -1.1270    0.3020    0.0000 H   0  0  0  0  0  0  0  0  0  0  0  0
   -1.4289   -0.8250    0.0000 H   0  0  0  0  0  0  0  0  0  0  0  0
   -0.3020   -1.1270    0.0000 H   0  0  0  0  0  0  0  0  0  0  0  0
   -0.0000   -1.6500    0.0000 H   0  0  0  0  0  0  0  0  0  0  0  0
    1.7309   -1.1270    0.0000 H   0  0  0  0  0  0  0  0  0  0  0  0
    2.8579   -0.8250    0.0000 H   0  0  0  0  0  0  0  0  0  0  0  0
    2.5559    0.3020    0.0000 H   0  0  0  0  0  0  0  0  0  0  0  0
  1  2  1  0  0  0  0
  2  3  4  0  0  0  0
  3  4  4  0  0  0  0
  4  5  4  0  0  0  0
  5  6  4  0  0  0  0
  6  7  4  0  0  0  0
  2  7  4  0  0  0  0
  6  8  1  0  0  0  0
  5  9  1  0  0  0  0
  4 10  1  0  0  0  0
  1 11  1  0  0  0  0
  1 12  1  0  0  0  0
  1 13  1  0  0  0  0
  3 14  1  0  0  0  0
  7 15  1  0  0  0  0
  8 16  1  0  0  0  0
  8 17  1  0  0  0  0
  8 18  1  0  0  0  0
  9 19  1  0  0  0  0
 10 20  1  0  0  0  0
 10 21  1  0  0  0  0
 10 22  1  0  0  0  0
M  END
$$$$
85
  Mrv2314 01052423262D          

 31 31  0  0  0  0            999 V2000
    0.0000    3.3000    0.0000 C   0  0  0  0  0  0  0  0  0  0  0  0
    0.0000    2.4750    0.0000 C   0  0  0  0  0  0  0  0  0  0  0  0
   -0.7145    2.0625    0.0000 C   0  0  0  0  0  0  0  0  0  0  0  0
    0.7145    2.0625    0.0000 N   0  0  0  0  0  0  0  0  0  0  0  0
    0.7145    1.2375    0.0000 C   0  0  0  0  0  0  0  0  0  0  0  0
    1.4289    0.8250    0.0000 N   0  0  0  0  0  0  0  0  0  0  0  0
    1.4289   -0.0000    0.0000 C   0  0  0  0  0  0  0  0  0  0  0  0
    0.7145   -0.4125    0.0000 N   0  0  0  0  0  0  0  0  0  0  0  0
    0.0000    0.0000    0.0000 C   0  0  0  0  0  0  0  0  0  0  0  0
    0.0000    0.8250    0.0000 N   0  0  0  0  0  0  0  0  0  0  0  0
   -0.7145   -0.4125    0.0000 Cl  0  0  0  0  0  0  0  0  0  0  0  0
    2.1434   -0.4125    0.0000 N   0  0  0  0  0  0  0  0  0  0  0  0
    2.1434   -1.2375    0.0000 C   0  0  0  0  0  0  0  0  0  0  0  0
    2.8579   -1.6500    0.0000 C   0  0  0  0  0  0  0  0  0  0  0  0
    1.4289   -1.6500    0.0000 C   0  0  0  0  0  0  0  0  0  0  0  0
    0.8250    3.3000    0.0000 H   0  0  0  0  0  0  0  0  0  0  0  0
    0.0000    4.1250    0.0000 H   0  0  0  0  0  0  0  0  0  0  0  0
   -0.8250    3.3000    0.0000 H   0  0  0  0  0  0  0  0  0  0  0  0
   -0.7145    2.8875    0.0000 H   0  0  0  0  0  0  0  0  0  0  0  0
   -1.5114    2.2760    0.0000 H   0  0  0  0  0  0  0  0  0  0  0  0
   -1.1270    1.3480    0.0000 H   0  0  0  0  0  0  0  0  0  0  0  0
   -0.1311    1.4791    0.0000 H   0  0  0  0  0  0  0  0  0  0  0  0
    1.4289    2.4750    0.0000 H   0  0  0  0  0  0  0  0  0  0  0  0
    2.8579   -0.0000    0.0000 H   0  0  0  0  0  0  0  0  0  0  0  0
    2.8579   -0.8250    0.0000 H   0  0  0  0  0  0  0  0  0  0  0  0
    2.2745   -2.2334    0.0000 H   0  0  0  0  0  0  0  0  0  0  0  0
    3.2704   -2.3645    0.0000 H   0  0  0  0  0  0  0  0  0  0  0  0
    3.6548   -1.4365    0.0000 H   0  0  0  0  0  0  0  0  0  0  0  0
    1.0164   -0.9355    0.0000 H   0  0  0  0  0  0  0  0  0  0  0  0
    0.7145   -2.0625    0.0000 H   0  0  0  0  0  0  0  0  0  0  0  0
    1.8414   -2.3645    0.0000 H   0  0  0  0  0  0  0  0  0  0  0  0
  1  2  1  0  0  0  0
  2  3  1  0  0  0  0
  2  4  1  0  0  0  0
  4  5  1  0  0  0  0
  5  6  4  0  0  0  0
  6  7  4  0  0  0  0
  7  8  4  0  0  0  0
  8  9  4  0  0  0  0
  9 10  4  0  0  0  0
  5 10  4  0  0  0  0
  9 11  1  0  0  0  0
  7 12  1  0  0  0  0
 12 13  1  0  0  0  0
 13 14  1  0  0  0  0
 13 15  1  0  0  0  0
  1 16  1  0  0  0  0
  1 17  1  0  0  0  0
  1 18  1  0  0  0  0
  2 19  1  0  0  0  0
  3 20  1  0  0  0  0
  3 21  1  0  0  0  0
  3 22  1  0  0  0  0
  4 23  1  0  0  0  0
 12 24  1  0  0  0  0
 13 25  1  0  0  0  0
 14 26  1  0  0  0  0
 14 27  1  0  0  0  0
 14 28  1  0  0  0  0
 15 29  1  0  0  0  0
 15 30  1  0  0  0  0
 15 31  1  0  0  0  0
M  END
$$$$
86
  Mrv2314 01052423262D          

 19 19  0  0  0  0            999 V2000
    0.7145    1.2375    0.0000 C   0  0  0  0  0  0  0  0  0  0  0  0
    1.4289    0.8250    0.0000 C   0  0  0  0  0  0  0  0  0  0  0  0
    1.4289   -0.0000    0.0000 C   0  0  0  0  0  0  0  0  0  0  0  0
    0.7145   -0.4125    0.0000 C   0  0  0  0  0  0  0  0  0  0  0  0
    0.0000    0.0000    0.0000 C   0  0  0  0  0  0  0  0  0  0  0  0
    0.0000    0.8250    0.0000 C   0  0  0  0  0  0  0  0  0  0  0  0
   -0.7145    1.2375    0.0000 Cl  0  0  0  0  0  0  0  0  0  0  0  0
    0.7145   -1.2375    0.0000 Cl  0  0  0  0  0  0  0  0  0  0  0  0
    2.1434   -0.4125    0.0000 O   0  0  0  0  0  0  0  0  0  0  0  0
    2.8579   -0.0000    0.0000 C   0  0  0  0  0  0  0  0  0  0  0  0
    3.5724   -0.4125    0.0000 C   0  0  0  0  0  0  0  0  0  0  0  0
    4.2868   -0.0000    0.0000 O   0  0  0  0  0  0  0  0  0  0  0  0
    3.5724   -1.2375    0.0000 O   0  0  0  0  0  0  0  0  0  0  0  0
    0.7145    2.0625    0.0000 H   0  0  0  0  0  0  0  0  0  0  0  0
    2.1434    1.2375    0.0000 H   0  0  0  0  0  0  0  0  0  0  0  0
   -0.7145   -0.4125    0.0000 H   0  0  0  0  0  0  0  0  0  0  0  0
    3.2281    0.7372    0.0000 H   0  0  0  0  0  0  0  0  0  0  0  0
    2.4876    0.7372    0.0000 H   0  0  0  0  0  0  0  0  0  0  0  0
    2.8579   -1.6500    0.0000 H   0  0  0  0  0  0  0  0  0  0  0  0
  1  2  4  0  0  0  0
  2  3  4  0  0  0  0
  3  4  4  0  0  0  0
  4  5  4  0  0  0  0
  5  6  4  0  0  0  0
  1  6  4  0  0  0  0
  6  7  1  0  0  0  0
  4  8  1  0  0  0  0
  3  9  1  0  0  0  0
  9 10  1  0  0  0  0
 10 11  1  0  0  0  0
 11 12  2  0  0  0  0
 11 13  1  0  0  0  0
  1 14  1  0  0  0  0
  2 15  1  0  0  0  0
  5 16  1  0  0  0  0
 10 17  1  0  0  0  0
 10 18  1  0  0  0  0
 13 19  1  0  0  0  0
M  END
$$$$
87
  Mrv2314 01052423262D          

 25 25  0  0  0  0            999 V2000
   -2.1434    2.8875    0.0000 C   0  0  0  0  0  0  0  0  0  0  0  0
   -1.4289    2.4750    0.0000 C   0  0  0  0  0  0  0  0  0  0  0  0
   -1.4289    1.6500    0.0000 C   0  0  0  0  0  0  0  0  0  0  0  0
   -2.1434    1.2375    0.0000 C   0  0  0  0  0  0  0  0  0  0  0  0
   -2.8579    1.6500    0.0000 C   0  0  0  0  0  0  0  0  0  0  0  0
   -2.8579    2.4750    0.0000 C   0  0  0  0  0  0  0  0  0  0  0  0
   -3.5724    2.8875    0.0000 Cl  0  0  0  0  0  0  0  0  0  0  0  0
   -2.1434    0.4125    0.0000 Cl  0  0  0  0  0  0  0  0  0  0  0  0
   -0.7145    1.2375    0.0000 O   0  0  0  0  0  0  0  0  0  0  0  0
   -0.0000    1.6500    0.0000 C   0  0  0  0  0  0  0  0  0  0  0  0
    0.7145    1.2375    0.0000 C   0  0  0  0  0  0  0  0  0  0  0  0
    1.4289    1.6500    0.0000 C   0  0  0  0  0  0  0  0  0  0  0  0
    2.1434    1.2375    0.0000 C   0  0  0  0  0  0  0  0  0  0  0  0
    2.8579    1.6500    0.0000 O   0  0  0  0  0  0  0  0  0  0  0  0
    2.1434    0.4125    0.0000 O   0  0  0  0  0  0  0  0  0  0  0  0
   -2.1434    3.7125    0.0000 H   0  0  0  0  0  0  0  0  0  0  0  0
   -0.7145    2.8875    0.0000 H   0  0  0  0  0  0  0  0  0  0  0  0
   -3.5724    1.2375    0.0000 H   0  0  0  0  0  0  0  0  0  0  0  0
    0.3703    2.3872    0.0000 H   0  0  0  0  0  0  0  0  0  0  0  0
   -0.3703    2.3872    0.0000 H   0  0  0  0  0  0  0  0  0  0  0  0
    0.3442    0.5003    0.0000 H   0  0  0  0  0  0  0  0  0  0  0  0
    1.0847    0.5003    0.0000 H   0  0  0  0  0  0  0  0  0  0  0  0
    1.7992    2.3872    0.0000 H   0  0  0  0  0  0  0  0  0  0  0  0
    1.0587    2.3872    0.0000 H   0  0  0  0  0  0  0  0  0  0  0  0
    1.4289    0.0000    0.0000 H   0  0  0  0  0  0  0  0  0  0  0  0
  1  2  4  0  0  0  0
  2  3  4  0  0  0  0
  3  4  4  0  0  0  0
  4  5  4  0  0  0  0
  5  6  4  0  0  0  0
  1  6  4  0  0  0  0
  6  7  1  0  0  0  0
  4  8  1  0  0  0  0
  3  9  1  0  0  0  0
  9 10  1  0  0  0  0
 10 11  1  0  0  0  0
 11 12  1  0  0  0  0
 12 13  1  0  0  0  0
 13 14  2  0  0  0  0
 13 15  1  0  0  0  0
  1 16  1  0  0  0  0
  2 17  1  0  0  0  0
  5 18  1  0  0  0  0
 10 19  1  0  0  0  0
 10 20  1  0  0  0  0
 11 21  1  0  0  0  0
 11 22  1  0  0  0  0
 12 23  1  0  0  0  0
 12 24  1  0  0  0  0
 15 25  1  0  0  0  0
M  END
$$$$
88
  Mrv2314 01052423262D          

 26 27  0  0  0  0            999 V2000
    2.1434   -1.2375    0.0000 C   0  0  0  0  0  0  0  0  0  0  0  0
    2.8579   -1.6500    0.0000 C   0  0  0  0  0  0  0  0  0  0  0  0
    2.8579   -2.4750    0.0000 C   0  0  0  0  0  0  0  0  0  0  0  0
    2.1434   -2.8875    0.0000 C   0  0  0  0  0  0  0  0  0  0  0  0
    1.4289   -2.4750    0.0000 C   0  0  0  0  0  0  0  0  0  0  0  0
    1.4289   -1.6500    0.0000 C   0  0  0  0  0  0  0  0  0  0  0  0
    2.1434   -3.7125    0.0000 C   0  0  0  0  0  0  0  0  0  0  0  0
    2.8579   -4.1250    0.0000 O   0  0  0  0  0  0  0  0  0  0  0  0
    1.4289   -4.1250    0.0000 C   0  0  0  0  0  0  0  0  0  0  0  0
    1.4289   -4.9500    0.0000 C   0  0  0  0  0  0  0  0  0  0  0  0
    0.7145   -5.3625    0.0000 C   0  0  0  0  0  0  0  0  0  0  0  0
   -0.0000   -4.9500    0.0000 C   0  0  0  0  0  0  0  0  0  0  0  0
    0.0000   -4.1250    0.0000 C   0  0  0  0  0  0  0  0  0  0  0  0
    0.7145   -3.7125    0.0000 C   0  0  0  0  0  0  0  0  0  0  0  0
   -0.7145   -5.3625    0.0000 O   0  0  0  0  0  0  0  0  0  0  0  0
    2.1434   -5.3625    0.0000 O   0  0  0  0  0  0  0  0  0  0  0  0
    2.1434   -0.4125    0.0000 H   0  0  0  0  0  0  0  0  0  0  0  0
    3.5724   -1.2375    0.0000 H   0  0  0  0  0  0  0  0  0  0  0  0
    3.5724   -2.8875    0.0000 H   0  0  0  0  0  0  0  0  0  0  0  0
    0.7145   -2.8875    0.0000 H   0  0  0  0  0  0  0  0  0  0  0  0
    0.7145   -1.2375    0.0000 H   0  0  0  0  0  0  0  0  0  0  0  0
    0.7145   -6.1875    0.0000 H   0  0  0  0  0  0  0  0  0  0  0  0
   -0.7145   -3.7125    0.0000 H   0  0  0  0  0  0  0  0  0  0  0  0
    1.4289   -3.3000    0.0000 H   0  0  0  0  0  0  0  0  0  0  0  0
   -1.4289   -4.9500    0.0000 H   0  0  0  0  0  0  0  0  0  0  0  0
    2.1434   -6.1875    0.0000 H   0  0  0  0  0  0  0  0  0  0  0  0
  1  2  4  0  0  0  0
  2  3  4  0  0  0  0
  3  4  4  0  0  0  0
  4  5  4  0  0  0  0
  5  6  4  0  0  0  0
  1  6  4  0  0  0  0
  4  7  1  0  0  0  0
  7  8  2  0  0  0  0
  7  9  1  0  0  0  0
  9 10  4  0  0  0  0
 10 11  4  0  0  0  0
 11 12  4  0  0  0  0
 12 13  4  0  0  0  0
 13 14  4  0  0  0  0
  9 14  4  0  0  0  0
 12 15  1  0  0  0  0
 10 16  1  0  0  0  0
  1 17  1  0  0  0  0
  2 18  1  0  0  0  0
  3 19  1  0  0  0  0
  5 20  1  0  0  0  0
  6 21  1  0  0  0  0
 11 22  1  0  0  0  0
 13 23  1  0  0  0  0
 14 24  1  0  0  0  0
 15 25  1  0  0  0  0
 16 26  1  0  0  0  0
M  END
$$$$
89
  Mrv2314 01052423262D          

 17 17  0  0  0  0            999 V2000
    0.7145    1.2375    0.0000 C   0  0  0  0  0  0  0  0  0  0  0  0
    1.4289    0.8250    0.0000 C   0  0  0  0  0  0  0  0  0  0  0  0
    1.4289   -0.0000    0.0000 C   0  0  0  0  0  0  0  0  0  0  0  0
    0.7145   -0.4125    0.0000 C   0  0  0  0  0  0  0  0  0  0  0  0
    0.0000    0.0000    0.0000 C   0  0  0  0  0  0  0  0  0  0  0  0
    0.0000    0.8250    0.0000 C   0  0  0  0  0  0  0  0  0  0  0  0
   -0.7145    1.2375    0.0000 N   0  3  0  0  0  0  0  0  0  0  0  0
   -0.7145    2.0625    0.0000 O   0  0  0  0  0  0  0  0  0  0  0  0
   -1.4289    0.8250    0.0000 O   0  5  0  0  0  0  0  0  0  0  0  0
    0.7145   -1.2375    0.0000 N   0  3  0  0  0  0  0  0  0  0  0  0
    1.4289   -1.6500    0.0000 O   0  0  0  0  0  0  0  0  0  0  0  0
   -0.0000   -1.6500    0.0000 O   0  5  0  0  0  0  0  0  0  0  0  0
    2.1434   -0.4125    0.0000 O   0  0  0  0  0  0  0  0  0  0  0  0
    0.7145    2.0625    0.0000 H   0  0  0  0  0  0  0  0  0  0  0  0
    2.1434    1.2375    0.0000 H   0  0  0  0  0  0  0  0  0  0  0  0
   -0.7145   -0.4125    0.0000 H   0  0  0  0  0  0  0  0  0  0  0  0
    2.1434   -1.2375    0.0000 H   0  0  0  0  0  0  0  0  0  0  0  0
  1  2  4  0  0  0  0
  2  3  4  0  0  0  0
  3  4  4  0  0  0  0
  4  5  4  0  0  0  0
  5  6  4  0  0  0  0
  1  6  4  0  0  0  0
  6  7  1  0  0  0  0
  7  8  2  0  0  0  0
  7  9  1  0  0  0  0
  4 10  1  0  0  0  0
 10 11  2  0  0  0  0
 10 12  1  0  0  0  0
  3 13  1  0  0  0  0
  1 14  1  0  0  0  0
  2 15  1  0  0  0  0
  5 16  1  0  0  0  0
 13 17  1  0  0  0  0
M  CHG  4   7   1   9  -1  10   1  12  -1
M  END
$$$$
90
  Mrv2314 01052423262D          

 19 19  0  0  0  0            999 V2000
    0.7145    2.0625    0.0000 C   0  0  0  0  0  0  0  0  0  0  0  0
    0.7145    1.2375    0.0000 C   0  0  0  0  0  0  0  0  0  0  0  0
    1.4289    0.8250    0.0000 C   0  0  0  0  0  0  0  0  0  0  0  0
    1.4289   -0.0000    0.0000 C   0  0  0  0  0  0  0  0  0  0  0  0
    0.7145   -0.4125    0.0000 C   0  0  0  0  0  0  0  0  0  0  0  0
    0.0000    0.0000    0.0000 C   0  0  0  0  0  0  0  0  0  0  0  0
    0.0000    0.8250    0.0000 C   0  0  0  0  0  0  0  0  0  0  0  0
    0.7145   -1.2375    0.0000 N   0  3  0  0  0  0  0  0  0  0  0  0
    1.4289   -1.6500    0.0000 O   0  0  0  0  0  0  0  0  0  0  0  0
   -0.0000   -1.6500    0.0000 O   0  5  0  0  0  0  0  0  0  0  0  0
    2.1434    1.2375    0.0000 N   0  3  0  0  0  0  0  0  0  0  0  0
    2.8579    0.8250    0.0000 O   0  0  0  0  0  0  0  0  0  0  0  0
    2.1434    2.0625    0.0000 O   0  5  0  0  0  0  0  0  0  0  0  0
    1.5395    2.0625    0.0000 H   0  0  0  0  0  0  0  0  0  0  0  0
    0.7145    2.8875    0.0000 H   0  0  0  0  0  0  0  0  0  0  0  0
   -0.1105    2.0625    0.0000 H   0  0  0  0  0  0  0  0  0  0  0  0
    2.1434   -0.4125    0.0000 H   0  0  0  0  0  0  0  0  0  0  0  0
   -0.7145   -0.4125    0.0000 H   0  0  0  0  0  0  0  0  0  0  0  0
   -0.7145    1.2375    0.0000 H   0  0  0  0  0  0  0  0  0  0  0  0
  1  2  1  0  0  0  0
  2  3  4  0  0  0  0
  3  4  4  0  0  0  0
  4  5  4  0  0  0  0
  5  6  4  0  0  0  0
  6  7  4  0  0  0  0
  2  7  4  0  0  0  0
  5  8  1  0  0  0  0
  8  9  2  0  0  0  0
  8 10  1  0  0  0  0
  3 11  1  0  0  0  0
 11 12  2  0  0  0  0
 11 13  1  0  0  0  0
  1 14  1  0  0  0  0
  1 15  1  0  0  0  0
  1 16  1  0  0  0  0
  4 17  1  0  0  0  0
  6 18  1  0  0  0  0
  7 19  1  0  0  0  0
M  CHG  4   8   1  10  -1  11   1  13  -1
M  END
$$$$
91
  Mrv2314 01052423262D          

 37 37  0  0  0  0            999 V2000
    0.7145    2.8875    0.0000 C   0  0  0  0  0  0  0  0  0  0  0  0
    0.7145    2.0625    0.0000 C   0  0  0  0  0  0  0  0  0  0  0  0
   -0.1105    2.0625    0.0000 C   0  0  0  0  0  0  0  0  0  0  0  0
    1.5395    2.0625    0.0000 C   0  0  0  0  0  0  0  0  0  0  0  0
    0.7145    1.2375    0.0000 C   0  0  0  0  0  0  0  0  0  0  0  0
    1.4289    0.8250    0.0000 C   0  0  0  0  0  0  0  0  0  0  0  0
    1.4289   -0.0000    0.0000 C   0  0  0  0  0  0  0  0  0  0  0  0
    0.7145   -0.4125    0.0000 C   0  0  0  0  0  0  0  0  0  0  0  0
    0.0000    0.0000    0.0000 C   0  0  0  0  0  0  0  0  0  0  0  0
    0.0000    0.8250    0.0000 C   0  0  0  0  0  0  0  0  0  0  0  0
    0.7145   -1.2375    0.0000 O   0  0  0  0  0  0  0  0  0  0  0  0
    2.1434   -0.4125    0.0000 C   0  0  0  0  0  0  0  0  0  0  0  0
    2.8579   -0.8250    0.0000 C   0  0  0  0  0  0  0  0  0  0  0  0
    1.7309   -1.1270    0.0000 C   0  0  0  0  0  0  0  0  0  0  0  0
    2.5559    0.3020    0.0000 C   0  0  0  0  0  0  0  0  0  0  0  0
    1.5395    2.8875    0.0000 H   0  0  0  0  0  0  0  0  0  0  0  0
    0.7145    3.7125    0.0000 H   0  0  0  0  0  0  0  0  0  0  0  0
   -0.1105    2.8875    0.0000 H   0  0  0  0  0  0  0  0  0  0  0  0
   -0.8727    2.3782    0.0000 H   0  0  0  0  0  0  0  0  0  0  0  0
   -0.6939    1.4791    0.0000 H   0  0  0  0  0  0  0  0  0  0  0  0
    0.2052    1.3003    0.0000 H   0  0  0  0  0  0  0  0  0  0  0  0
    1.2238    1.3003    0.0000 H   0  0  0  0  0  0  0  0  0  0  0  0
    2.1228    1.4791    0.0000 H   0  0  0  0  0  0  0  0  0  0  0  0
    2.3017    2.3782    0.0000 H   0  0  0  0  0  0  0  0  0  0  0  0
    2.1864    0.4981    0.0000 H   0  0  0  0  0  0  0  0  0  0  0  0
   -0.7145   -0.4125    0.0000 H   0  0  0  0  0  0  0  0  0  0  0  0
   -0.7575    0.4981    0.0000 H   0  0  0  0  0  0  0  0  0  0  0  0
   -0.0000   -1.6500    0.0000 H   0  0  0  0  0  0  0  0  0  0  0  0
    2.4454   -1.5395    0.0000 H   0  0  0  0  0  0  0  0  0  0  0  0
    3.5724   -1.2375    0.0000 H   0  0  0  0  0  0  0  0  0  0  0  0
    3.2704   -0.1105    0.0000 H   0  0  0  0  0  0  0  0  0  0  0  0
    1.2287   -0.4725    0.0000 H   0  0  0  0  0  0  0  0  0  0  0  0
    0.9340   -1.3405    0.0000 H   0  0  0  0  0  0  0  0  0  0  0  0
    1.6232   -1.9449    0.0000 H   0  0  0  0  0  0  0  0  0  0  0  0
    3.3509    0.5226    0.0000 H   0  0  0  0  0  0  0  0  0  0  0  0
    2.9556    1.0237    0.0000 H   0  0  0  0  0  0  0  0  0  0  0  0
    2.3212    1.0929    0.0000 H   0  0  0  0  0  0  0  0  0  0  0  0
  1  2  1  0  0  0  0
  2  3  1  0  0  0  0
  2  4  1  0  0  0  0
  2  5  1  0  0  0  0
  5  6  4  0  0  0  0
  6  7  4  0  0  0  0
  7  8  4  0  0  0  0
  8  9  4  0  0  0  0
  9 10  4  0  0  0  0
  5 10  4  0  0  0  0
  8 11  1  0  0  0  0
  7 12  1  0  0  0  0
 12 13  1  0  0  0  0
 12 14  1  0  0  0  0
 12 15  1  0  0  0  0
  1 16  1  0  0  0  0
  1 17  1  0  0  0  0
  1 18  1  0  0  0  0
  3 19  1  0  0  0  0
  3 20  1  0  0  0  0
  3 21  1  0  0  0  0
  4 22  1  0  0  0  0
  4 23  1  0  0  0  0
  4 24  1  0  0  0  0
  6 25  1  0  0  0  0
  9 26  1  0  0  0  0
 10 27  1  0  0  0  0
 11 28  1  0  0  0  0
 13 29  1  0  0  0  0
 13 30  1  0  0  0  0
 13 31  1  0  0  0  0
 14 32  1  0  0  0  0
 14 33  1  0  0  0  0
 14 34  1  0  0  0  0
 15 35  1  0  0  0  0
 15 36  1  0  0  0  0
 15 37  1  0  0  0  0
M  END
$$$$
92
  Mrv2314 01052423262D          

 44 44  0  0  0  0            999 V2000
    0.0000    3.3000    0.0000 C   0  0  0  0  0  0  0  0  0  0  0  0
    0.7145    2.8875    0.0000 C   0  0  0  0  0  0  0  0  0  0  0  0
    0.7145    2.0625    0.0000 C   0  0  0  0  0  0  0  0  0  0  0  0
   -0.1105    2.0625    0.0000 C   0  0  0  0  0  0  0  0  0  0  0  0
    1.5395    2.0625    0.0000 C   0  0  0  0  0  0  0  0  0  0  0  0
    0.7145    1.2375    0.0000 C   0  0  0  0  0  0  0  0  0  0  0  0
    1.4289    0.8250    0.0000 C   0  0  0  0  0  0  0  0  0  0  0  0
    1.4289   -0.0000    0.0000 C   0  0  0  0  0  0  0  0  0  0  0  0
    0.7145   -0.4125    0.0000 C   0  0  0  0  0  0  0  0  0  0  0  0
    0.0000    0.0000    0.0000 C   0  0  0  0  0  0  0  0  0  0  0  0
    0.0000    0.8250    0.0000 C   0  0  0  0  0  0  0  0  0  0  0  0
   -0.7145    1.2375    0.0000 O   0  0  0  0  0  0  0  0  0  0  0  0
    0.7145   -1.2375    0.0000 C   0  0  0  0  0  0  0  0  0  0  0  0
   -0.1105   -1.2375    0.0000 C   0  0  0  0  0  0  0  0  0  0  0  0
    1.5395   -1.2375    0.0000 C   0  0  0  0  0  0  0  0  0  0  0  0
    0.7145   -2.0625    0.0000 C   0  0  0  0  0  0  0  0  0  0  0  0
    1.4289   -2.4750    0.0000 C   0  0  0  0  0  0  0  0  0  0  0  0
    2.1434   -0.4125    0.0000 O   0  0  0  0  0  0  0  0  0  0  0  0
    0.4125    4.0145    0.0000 H   0  0  0  0  0  0  0  0  0  0  0  0
   -0.7145    3.7125    0.0000 H   0  0  0  0  0  0  0  0  0  0  0  0
   -0.4125    2.5855    0.0000 H   0  0  0  0  0  0  0  0  0  0  0  0
    1.5381    2.9355    0.0000 H   0  0  0  0  0  0  0  0  0  0  0  0
    1.1678    3.5768    0.0000 H   0  0  0  0  0  0  0  0  0  0  0  0
   -0.9355    2.0625    0.0000 H   0  0  0  0  0  0  0  0  0  0  0  0
   -0.5230    1.3480    0.0000 H   0  0  0  0  0  0  0  0  0  0  0  0
    0.3020    1.3480    0.0000 H   0  0  0  0  0  0  0  0  0  0  0  0
    1.2241    1.3002    0.0000 H   0  0  0  0  0  0  0  0  0  0  0  0
    2.1233    1.4796    0.0000 H   0  0  0  0  0  0  0  0  0  0  0  0
    2.3013    2.3791    0.0000 H   0  0  0  0  0  0  0  0  0  0  0  0
    2.1864    0.4981    0.0000 H   0  0  0  0  0  0  0  0  0  0  0  0
   -0.7145   -0.4125    0.0000 H   0  0  0  0  0  0  0  0  0  0  0  0
   -1.3690    0.7353    0.0000 H   0  0  0  0  0  0  0  0  0  0  0  0
   -0.1105   -0.4125    0.0000 H   0  0  0  0  0  0  0  0  0  0  0  0
   -0.9355   -1.2375    0.0000 H   0  0  0  0  0  0  0  0  0  0  0  0
   -0.1105   -2.0625    0.0000 H   0  0  0  0  0  0  0  0  0  0  0  0
    1.5395   -2.0625    0.0000 H   0  0  0  0  0  0  0  0  0  0  0  0
    2.3645   -1.2375    0.0000 H   0  0  0  0  0  0  0  0  0  0  0  0
    1.5395   -0.4125    0.0000 H   0  0  0  0  0  0  0  0  0  0  0  0
    0.1842   -2.6945    0.0000 H   0  0  0  0  0  0  0  0  0  0  0  0
    0.8577   -2.8750    0.0000 H   0  0  0  0  0  0  0  0  0  0  0  0
    1.4289   -3.3000    0.0000 H   0  0  0  0  0  0  0  0  0  0  0  0
    2.1047   -2.9482    0.0000 H   0  0  0  0  0  0  0  0  0  0  0  0
    2.2042   -2.1928    0.0000 H   0  0  0  0  0  0  0  0  0  0  0  0
    2.9637   -0.3241    0.0000 H   0  0  0  0  0  0  0  0  0  0  0  0
  1  2  1  0  0  0  0
  2  3  1  0  0  0  0
  3  4  1  0  0  0  0
  3  5  1  0  0  0  0
  3  6  1  0  0  0  0
  6  7  4  0  0  0  0
  7  8  4  0  0  0  0
  8  9  4  0  0  0  0
  9 10  4  0  0  0  0
 10 11  4  0  0  0  0
  6 11  4  0  0  0  0
 11 12  1  0  0  0  0
  9 13  1  0  0  0  0
 13 14  1  0  0  0  0
 13 15  1  0  0  0  0
 13 16  1  0  0  0  0
 16 17  1  0  0  0  0
  8 18  1  0  0  0  0
  1 19  1  0  0  0  0
  1 20  1  0  0  0  0
  1 21  1  0  0  0  0
  2 22  1  0  0  0  0
  2 23  1  0  0  0  0
  4 24  1  0  0  0  0
  4 25  1  0  0  0  0
  4 26  1  0  0  0  0
  5 27  1  0  0  0  0
  5 28  1  0  0  0  0
  5 29  1  0  0  0  0
  7 30  1  0  0  0  0
 10 31  1  0  0  0  0
 12 32  1  0  0  0  0
 14 33  1  0  0  0  0
 14 34  1  0  0  0  0
 14 35  1  0  0  0  0
 15 36  1  0  0  0  0
 15 37  1  0  0  0  0
 15 38  1  0  0  0  0
 16 39  1  0  0  0  0
 16 40  1  0  0  0  0
 17 41  1  0  0  0  0
 17 42  1  0  0  0  0
 17 43  1  0  0  0  0
 18 44  1  0  0  0  0
M  END
$$$$
93
  Mrv2314 01052423262D          

 38 38  0  0  0  0            999 V2000
    0.7145    2.8875    0.0000 C   0  0  0  0  0  0  0  0  0  0  0  0
    0.7145    2.0625    0.0000 C   0  0  0  0  0  0  0  0  0  0  0  0
   -0.1105    2.0625    0.0000 C   0  0  0  0  0  0  0  0  0  0  0  0
    1.5395    2.0625    0.0000 C   0  0  0  0  0  0  0  0  0  0  0  0
    0.7145    1.2375    0.0000 C   0  0  0  0  0  0  0  0  0  0  0  0
    1.4289    0.8250    0.0000 C   0  0  0  0  0  0  0  0  0  0  0  0
    1.4289   -0.0000    0.0000 C   0  0  0  0  0  0  0  0  0  0  0  0
    0.7145   -0.4125    0.0000 C   0  0  0  0  0  0  0  0  0  0  0  0
    0.0000    0.0000    0.0000 C   0  0  0  0  0  0  0  0  0  0  0  0
    0.0000    0.8250    0.0000 C   0  0  0  0  0  0  0  0  0  0  0  0
   -0.7145    1.2375    0.0000 O   0  0  0  0  0  0  0  0  0  0  0  0
    0.7145   -1.2375    0.0000 C   0  0  0  0  0  0  0  0  0  0  0  0
    0.7145   -2.0625    0.0000 C   0  0  0  0  0  0  0  0  0  0  0  0
   -0.1105   -1.2375    0.0000 C   0  0  0  0  0  0  0  0  0  0  0  0
    1.5395   -1.2375    0.0000 C   0  0  0  0  0  0  0  0  0  0  0  0
    2.1434   -0.4125    0.0000 O   0  0  0  0  0  0  0  0  0  0  0  0
    1.5395    2.8875    0.0000 H   0  0  0  0  0  0  0  0  0  0  0  0
    0.7145    3.7125    0.0000 H   0  0  0  0  0  0  0  0  0  0  0  0
   -0.1105    2.8875    0.0000 H   0  0  0  0  0  0  0  0  0  0  0  0
   -0.8727    2.3782    0.0000 H   0  0  0  0  0  0  0  0  0  0  0  0
   -0.6939    1.4791    0.0000 H   0  0  0  0  0  0  0  0  0  0  0  0
    0.2052    1.3003    0.0000 H   0  0  0  0  0  0  0  0  0  0  0  0
    1.2238    1.3003    0.0000 H   0  0  0  0  0  0  0  0  0  0  0  0
    2.1228    1.4791    0.0000 H   0  0  0  0  0  0  0  0  0  0  0  0
    2.3017    2.3782    0.0000 H   0  0  0  0  0  0  0  0  0  0  0  0
    2.1864    0.4981    0.0000 H   0  0  0  0  0  0  0  0  0  0  0  0
   -0.7145   -0.4125    0.0000 H   0  0  0  0  0  0  0  0  0  0  0  0
   -1.4458    0.8557    0.0000 H   0  0  0  0  0  0  0  0  0  0  0  0
   -0.1105   -2.0625    0.0000 H   0  0  0  0  0  0  0  0  0  0  0  0
    0.7145   -2.8875    0.0000 H   0  0  0  0  0  0  0  0  0  0  0  0
    1.5395   -2.0625    0.0000 H   0  0  0  0  0  0  0  0  0  0  0  0
    0.2052   -0.4753    0.0000 H   0  0  0  0  0  0  0  0  0  0  0  0
   -0.6939   -0.6541    0.0000 H   0  0  0  0  0  0  0  0  0  0  0  0
   -0.8727   -1.5532    0.0000 H   0  0  0  0  0  0  0  0  0  0  0  0
    2.3017   -1.5532    0.0000 H   0  0  0  0  0  0  0  0  0  0  0  0
    2.1228   -0.6541    0.0000 H   0  0  0  0  0  0  0  0  0  0  0  0
    1.2238   -0.4753    0.0000 H   0  0  0  0  0  0  0  0  0  0  0  0
    2.9666   -0.4670    0.0000 H   0  0  0  0  0  0  0  0  0  0  0  0
  1  2  1  0  0  0  0
  2  3  1  0  0  0  0
  2  4  1  0  0  0  0
  2  5  1  0  0  0  0
  5  6  4  0  0  0  0
  6  7  4  0  0  0  0
  7  8  4  0  0  0  0
  8  9  4  0  0  0  0
  9 10  4  0  0  0  0
  5 10  4  0  0  0  0
 10 11  1  0  0  0  0
  8 12  1  0  0  0  0
 12 13  1  0  0  0  0
 12 14  1  0  0  0  0
 12 15  1  0  0  0  0
  7 16  1  0  0  0  0
  1 17  1  0  0  0  0
  1 18  1  0  0  0  0
  1 19  1  0  0  0  0
  3 20  1  0  0  0  0
  3 21  1  0  0  0  0
  3 22  1  0  0  0  0
  4 23  1  0  0  0  0
  4 24  1  0  0  0  0
  4 25  1  0  0  0  0
  6 26  1  0  0  0  0
  9 27  1  0  0  0  0
 11 28  1  0  0  0  0
 13 29  1  0  0  0  0
 13 30  1  0  0  0  0
 13 31  1  0  0  0  0
 14 32  1  0  0  0  0
 14 33  1  0  0  0  0
 14 34  1  0  0  0  0
 15 35  1  0  0  0  0
 15 36  1  0  0  0  0
 15 37  1  0  0  0  0
 16 38  1  0  0  0  0
M  END
$$$$
94
  Mrv2314 01052423262D          

 41 40  0  0  0  0            999 V2000
    4.2355    3.2704    0.0000 C   0  0  0  0  0  0  0  0  0  0  0  0
    4.9500    2.8579    0.0000 N   0  0  0  0  0  0  0  0  0  0  0  0
    4.9500    2.0329    0.0000 C   0  0  0  0  0  0  0  0  0  0  0  0
    5.6645    3.2704    0.0000 C   0  0  0  0  0  0  0  0  0  0  0  0
    6.3789    2.8579    0.0000 C   0  0  0  0  0  0  0  0  0  0  0  0
    7.0934    3.2704    0.0000 C   0  0  0  0  0  0  0  0  0  0  0  0
    7.8079    2.8579    0.0000 N   0  0  0  0  0  0  0  0  0  0  0  0
    7.8079    2.0329    0.0000 C   0  0  0  0  0  0  0  0  0  0  0  0
    8.5224    3.2704    0.0000 C   0  0  0  0  0  0  0  0  0  0  0  0
    9.2368    2.8579    0.0000 C   0  0  0  0  0  0  0  0  0  0  0  0
    9.9513    3.2704    0.0000 C   0  0  0  0  0  0  0  0  0  0  0  0
   10.6658    2.8579    0.0000 N   0  0  0  0  0  0  0  0  0  0  0  0
   11.3802    3.2704    0.0000 C   0  0  0  0  0  0  0  0  0  0  0  0
   10.6658    2.0329    0.0000 C   0  0  0  0  0  0  0  0  0  0  0  0
    4.6480    3.9849    0.0000 H   0  0  0  0  0  0  0  0  0  0  0  0
    3.5211    3.6829    0.0000 H   0  0  0  0  0  0  0  0  0  0  0  0
    3.8230    2.5559    0.0000 H   0  0  0  0  0  0  0  0  0  0  0  0
    4.1250    2.0329    0.0000 H   0  0  0  0  0  0  0  0  0  0  0  0
    4.9500    1.2079    0.0000 H   0  0  0  0  0  0  0  0  0  0  0  0
    5.7750    2.0329    0.0000 H   0  0  0  0  0  0  0  0  0  0  0  0
    6.0347    4.0076    0.0000 H   0  0  0  0  0  0  0  0  0  0  0  0
    5.2942    4.0076    0.0000 H   0  0  0  0  0  0  0  0  0  0  0  0
    6.0087    2.1206    0.0000 H   0  0  0  0  0  0  0  0  0  0  0  0
    6.7492    2.1206    0.0000 H   0  0  0  0  0  0  0  0  0  0  0  0
    7.4637    4.0076    0.0000 H   0  0  0  0  0  0  0  0  0  0  0  0
    6.7232    4.0076    0.0000 H   0  0  0  0  0  0  0  0  0  0  0  0
    6.9829    2.0329    0.0000 H   0  0  0  0  0  0  0  0  0  0  0  0
    7.8079    1.2079    0.0000 H   0  0  0  0  0  0  0  0  0  0  0  0
    8.6329    2.0329    0.0000 H   0  0  0  0  0  0  0  0  0  0  0  0
    8.8926    4.0076    0.0000 H   0  0  0  0  0  0  0  0  0  0  0  0
    8.1521    4.0076    0.0000 H   0  0  0  0  0  0  0  0  0  0  0  0
    8.8666    2.1206    0.0000 H   0  0  0  0  0  0  0  0  0  0  0  0
    9.6071    2.1206    0.0000 H   0  0  0  0  0  0  0  0  0  0  0  0
   10.3216    4.0076    0.0000 H   0  0  0  0  0  0  0  0  0  0  0  0
    9.5810    4.0076    0.0000 H   0  0  0  0  0  0  0  0  0  0  0  0
   11.7927    2.5559    0.0000 H   0  0  0  0  0  0  0  0  0  0  0  0
   12.0947    3.6829    0.0000 H   0  0  0  0  0  0  0  0  0  0  0  0
   10.9677    3.9849    0.0000 H   0  0  0  0  0  0  0  0  0  0  0  0
    9.8408    2.0329    0.0000 H   0  0  0  0  0  0  0  0  0  0  0  0
   10.6658    1.2079    0.0000 H   0  0  0  0  0  0  0  0  0  0  0  0
   11.4908    2.0329    0.0000 H   0  0  0  0  0  0  0  0  0  0  0  0
  1  2  1  0  0  0  0
  2  3  1  0  0  0  0
  2  4  1  0  0  0  0
  4  5  1  0  0  0  0
  5  6  1  0  0  0  0
  6  7  1  0  0  0  0
  7  8  1  0  0  0  0
  7  9  1  0  0  0  0
  9 10  1  0  0  0  0
 10 11  1  0  0  0  0
 11 12  1  0  0  0  0
 12 13  1  0  0  0  0
 12 14  1  0  0  0  0
  1 15  1  0  0  0  0
  1 16  1  0  0  0  0
  1 17  1  0  0  0  0
  3 18  1  0  0  0  0
  3 19  1  0  0  0  0
  3 20  1  0  0  0  0
  4 21  1  0  0  0  0
  4 22  1  0  0  0  0
  5 23  1  0  0  0  0
  5 24  1  0  0  0  0
  6 25  1  0  0  0  0
  6 26  1  0  0  0  0
  8 27  1  0  0  0  0
  8 28  1  0  0  0  0
  8 29  1  0  0  0  0
  9 30  1  0  0  0  0
  9 31  1  0  0  0  0
 10 32  1  0  0  0  0
 10 33  1  0  0  0  0
 11 34  1  0  0  0  0
 11 35  1  0  0  0  0
 13 36  1  0  0  0  0
 13 37  1  0  0  0  0
 13 38  1  0  0  0  0
 14 39  1  0  0  0  0
 14 40  1  0  0  0  0
 14 41  1  0  0  0  0
M  END
$$$$
95
  Mrv2314 01052423262D          

 13 13  0  0  0  0            999 V2000
    0.7145    1.2375    0.0000 C   0  0  0  0  0  0  0  0  0  0  0  0
    1.4289    0.8250    0.0000 C   0  0  0  0  0  0  0  0  0  0  0  0
    1.4289   -0.0000    0.0000 C   0  0  0  0  0  0  0  0  0  0  0  0
    0.7145   -0.4125    0.0000 C   0  0  0  0  0  0  0  0  0  0  0  0
    0.0000    0.0000    0.0000 C   0  0  0  0  0  0  0  0  0  0  0  0
    0.0000    0.8250    0.0000 C   0  0  0  0  0  0  0  0  0  0  0  0
   -0.7145   -0.4125    0.0000 Cl  0  0  0  0  0  0  0  0  0  0  0  0
    0.7145   -1.2375    0.0000 C   0  0  0  0  0  0  0  0  0  0  0  0
    0.7145   -2.0625    0.0000 N   0  0  0  0  0  0  0  0  0  0  0  0
    2.1434   -0.4125    0.0000 Cl  0  0  0  0  0  0  0  0  0  0  0  0
    0.7145    2.0625    0.0000 H   0  0  0  0  0  0  0  0  0  0  0  0
    2.1434    1.2375    0.0000 H   0  0  0  0  0  0  0  0  0  0  0  0
   -0.7145    1.2375    0.0000 H   0  0  0  0  0  0  0  0  0  0  0  0
  1  2  4  0  0  0  0
  2  3  4  0  0  0  0
  3  4  4  0  0  0  0
  4  5  4  0  0  0  0
  5  6  4  0  0  0  0
  1  6  4  0  0  0  0
  5  7  1  0  0  0  0
  4  8  1  0  0  0  0
  8  9  3  0  0  0  0
  3 10  1  0  0  0  0
  1 11  1  0  0  0  0
  2 12  1  0  0  0  0
  6 13  1  0  0  0  0
M  END
$$$$
96
  Mrv2314 01052423262D          

 26 26  0  0  0  0            999 V2000
    0.0000    2.4750    0.0000 C   0  0  0  0  0  0  0  0  0  0  0  0
    0.7145    2.0625    0.0000 C   0  0  0  0  0  0  0  0  0  0  0  0
    0.7145    1.2375    0.0000 C   0  0  0  0  0  0  0  0  0  0  0  0
    1.4289    0.8250    0.0000 C   0  0  0  0  0  0  0  0  0  0  0  0
    1.4289   -0.0000    0.0000 C   0  0  0  0  0  0  0  0  0  0  0  0
    0.7145   -0.4125    0.0000 C   0  0  0  0  0  0  0  0  0  0  0  0
    0.0000    0.0000    0.0000 C   0  0  0  0  0  0  0  0  0  0  0  0
    0.0000    0.8250    0.0000 C   0  0  0  0  0  0  0  0  0  0  0  0
    2.1434   -0.4125    0.0000 C   0  0  0  0  0  0  0  0  0  0  0  0
    2.8579   -0.0000    0.0000 C   0  0  0  0  0  0  0  0  0  0  0  0
    2.1434    1.2375    0.0000 N   0  0  0  0  0  0  0  0  0  0  0  0
    0.4125    3.1895    0.0000 H   0  0  0  0  0  0  0  0  0  0  0  0
   -0.7145    2.8875    0.0000 H   0  0  0  0  0  0  0  0  0  0  0  0
   -0.4125    1.7605    0.0000 H   0  0  0  0  0  0  0  0  0  0  0  0
    1.5381    2.1105    0.0000 H   0  0  0  0  0  0  0  0  0  0  0  0
    1.1678    2.7518    0.0000 H   0  0  0  0  0  0  0  0  0  0  0  0
    0.7145   -1.2375    0.0000 H   0  0  0  0  0  0  0  0  0  0  0  0
   -0.7145   -0.4125    0.0000 H   0  0  0  0  0  0  0  0  0  0  0  0
   -0.7145    1.2375    0.0000 H   0  0  0  0  0  0  0  0  0  0  0  0
    1.7732   -1.1497    0.0000 H   0  0  0  0  0  0  0  0  0  0  0  0
    2.5137   -1.1497    0.0000 H   0  0  0  0  0  0  0  0  0  0  0  0
    3.2704   -0.7145    0.0000 H   0  0  0  0  0  0  0  0  0  0  0  0
    3.5724    0.4125    0.0000 H   0  0  0  0  0  0  0  0  0  0  0  0
    2.4454    0.7145    0.0000 H   0  0  0  0  0  0  0  0  0  0  0  0
    2.7268    1.8209    0.0000 H   0  0  0  0  0  0  0  0  0  0  0  0
    1.9299    2.0344    0.0000 H   0  0  0  0  0  0  0  0  0  0  0  0
  1  2  1  0  0  0  0
  2  3  1  0  0  0  0
  3  4  4  0  0  0  0
  4  5  4  0  0  0  0
  5  6  4  0  0  0  0
  6  7  4  0  0  0  0
  7  8  4  0  0  0  0
  3  8  4  0  0  0  0
  5  9  1  0  0  0  0
  9 10  1  0  0  0  0
  4 11  1  0  0  0  0
  1 12  1  0  0  0  0
  1 13  1  0  0  0  0
  1 14  1  0  0  0  0
  2 15  1  0  0  0  0
  2 16  1  0  0  0  0
  6 17  1  0  0  0  0
  7 18  1  0  0  0  0
  8 19  1  0  0  0  0
  9 20  1  0  0  0  0
  9 21  1  0  0  0  0
 10 22  1  0  0  0  0
 10 23  1  0  0  0  0
 10 24  1  0  0  0  0
 11 25  1  0  0  0  0
 11 26  1  0  0  0  0
M  END
$$$$
97
  Mrv2314 01052423262D          

 60 60  0  0  0  0            999 V2000
    2.8579   -7.4250    0.0000 C   0  0  0  0  0  0  0  0  0  0  0  0
    3.5724   -7.8375    0.0000 C   0  0  0  0  0  0  0  0  0  0  0  0
    4.2868   -7.4250    0.0000 C   0  0  0  0  0  0  0  0  0  0  0  0
    5.0013   -7.8375    0.0000 C   0  0  0  0  0  0  0  0  0  0  0  0
    5.7158   -7.4250    0.0000 C   0  0  0  0  0  0  0  0  0  0  0  0
    6.4302   -7.8375    0.0000 C   0  0  0  0  0  0  0  0  0  0  0  0
    7.1447   -7.4250    0.0000 C   0  0  0  0  0  0  0  0  0  0  0  0
    7.8592   -7.8375    0.0000 C   0  0  0  0  0  0  0  0  0  0  0  0
    8.5737   -7.4250    0.0000 C   0  0  0  0  0  0  0  0  0  0  0  0
    9.2881   -7.8375    0.0000 C   0  0  0  0  0  0  0  0  0  0  0  0
   10.0026   -7.4250    0.0000 C   0  0  0  0  0  0  0  0  0  0  0  0
   10.7171   -7.8375    0.0000 C   0  0  0  0  0  0  0  0  0  0  0  0
   11.4315   -7.4250    0.0000 C   0  0  0  0  0  0  0  0  0  0  0  0
   12.1460   -7.8375    0.0000 N   0  0  0  0  0  0  0  0  0  0  0  0
   12.8605   -7.4250    0.0000 C   0  0  0  0  0  0  0  0  0  0  0  0
   13.5749   -7.8375    0.0000 C   0  0  0  0  0  0  0  0  0  0  0  0
   13.5749   -8.6625    0.0000 O   0  0  0  0  0  0  0  0  0  0  0  0
   12.8605   -9.0750    0.0000 C   0  0  0  0  0  0  0  0  0  0  0  0
   12.1460   -8.6625    0.0000 C   0  0  0  0  0  0  0  0  0  0  0  0
   12.8605   -9.9000    0.0000 C   0  0  0  0  0  0  0  0  0  0  0  0
   14.2894   -7.4250    0.0000 C   0  0  0  0  0  0  0  0  0  0  0  0
    3.2704   -6.7105    0.0000 H   0  0  0  0  0  0  0  0  0  0  0  0
    2.1434   -7.0125    0.0000 H   0  0  0  0  0  0  0  0  0  0  0  0
    2.4454   -8.1395    0.0000 H   0  0  0  0  0  0  0  0  0  0  0  0
    3.2021   -8.5747    0.0000 H   0  0  0  0  0  0  0  0  0  0  0  0
    3.9426   -8.5747    0.0000 H   0  0  0  0  0  0  0  0  0  0  0  0
    4.6571   -6.6878    0.0000 H   0  0  0  0  0  0  0  0  0  0  0  0
    3.9166   -6.6878    0.0000 H   0  0  0  0  0  0  0  0  0  0  0  0
    4.6310   -8.5747    0.0000 H   0  0  0  0  0  0  0  0  0  0  0  0
    5.3716   -8.5747    0.0000 H   0  0  0  0  0  0  0  0  0  0  0  0
    6.0860   -6.6878    0.0000 H   0  0  0  0  0  0  0  0  0  0  0  0
    5.3455   -6.6878    0.0000 H   0  0  0  0  0  0  0  0  0  0  0  0
    6.0600   -8.5747    0.0000 H   0  0  0  0  0  0  0  0  0  0  0  0
    6.8005   -8.5747    0.0000 H   0  0  0  0  0  0  0  0  0  0  0  0
    7.5150   -6.6878    0.0000 H   0  0  0  0  0  0  0  0  0  0  0  0
    6.7745   -6.6878    0.0000 H   0  0  0  0  0  0  0  0  0  0  0  0
    7.4889   -8.5747    0.0000 H   0  0  0  0  0  0  0  0  0  0  0  0
    8.2294   -8.5747    0.0000 H   0  0  0  0  0  0  0  0  0  0  0  0
    8.9439   -6.6878    0.0000 H   0  0  0  0  0  0  0  0  0  0  0  0
    8.2034   -6.6878    0.0000 H   0  0  0  0  0  0  0  0  0  0  0  0
    8.9179   -8.5747    0.0000 H   0  0  0  0  0  0  0  0  0  0  0  0
    9.6584   -8.5747    0.0000 H   0  0  0  0  0  0  0  0  0  0  0  0
   10.3729   -6.6878    0.0000 H   0  0  0  0  0  0  0  0  0  0  0  0
    9.6323   -6.6878    0.0000 H   0  0  0  0  0  0  0  0  0  0  0  0
   10.3468   -8.5747    0.0000 H   0  0  0  0  0  0  0  0  0  0  0  0
   11.0873   -8.5747    0.0000 H   0  0  0  0  0  0  0  0  0  0  0  0
   11.8018   -6.6878    0.0000 H   0  0  0  0  0  0  0  0  0  0  0  0
   11.0613   -6.6878    0.0000 H   0  0  0  0  0  0  0  0  0  0  0  0
   13.2307   -6.6878    0.0000 H   0  0  0  0  0  0  0  0  0  0  0  0
   12.4902   -6.6878    0.0000 H   0  0  0  0  0  0  0  0  0  0  0  0
   14.2894   -8.2500    0.0000 H   0  0  0  0  0  0  0  0  0  0  0  0
   12.1460   -9.4875    0.0000 H   0  0  0  0  0  0  0  0  0  0  0  0
   11.3708   -8.3803    0.0000 H   0  0  0  0  0  0  0  0  0  0  0  0
   11.3708   -8.9447    0.0000 H   0  0  0  0  0  0  0  0  0  0  0  0
   12.2771  -10.4834    0.0000 H   0  0  0  0  0  0  0  0  0  0  0  0
   13.2730  -10.6145    0.0000 H   0  0  0  0  0  0  0  0  0  0  0  0
   13.6574   -9.6865    0.0000 H   0  0  0  0  0  0  0  0  0  0  0  0
   15.0863   -7.6385    0.0000 H   0  0  0  0  0  0  0  0  0  0  0  0
   14.7019   -6.7105    0.0000 H   0  0  0  0  0  0  0  0  0  0  0  0
   13.7061   -6.8416    0.0000 H   0  0  0  0  0  0  0  0  0  0  0  0
  1  2  1  0  0  0  0
  2  3  1  0  0  0  0
  3  4  1  0  0  0  0
  4  5  1  0  0  0  0
  5  6  1  0  0  0  0
  6  7  1  0  0  0  0
  7  8  1  0  0  0  0
  8  9  1  0  0  0  0
  9 10  1  0  0  0  0
 10 11  1  0  0  0  0
 11 12  1  0  0  0  0
 12 13  1  0  0  0  0
 13 14  1  0  0  0  0
 14 15  1  0  0  0  0
 15 16  1  0  0  0  0
 16 17  1  0  0  0  0
 17 18  1  0  0  0  0
 18 19  1  0  0  0  0
 14 19  1  0  0  0  0
 18 20  1  0  0  0  0
 16 21  1  0  0  0  0
  1 22  1  0  0  0  0
  1 23  1  0  0  0  0
  1 24  1  0  0  0  0
  2 25  1  0  0  0  0
  2 26  1  0  0  0  0
  3 27  1  0  0  0  0
  3 28  1  0  0  0  0
  4 29  1  0  0  0  0
  4 30  1  0  0  0  0
  5 31  1  0  0  0  0
  5 32  1  0  0  0  0
  6 33  1  0  0  0  0
  6 34  1  0  0  0  0
  7 35  1  0  0  0  0
  7 36  1  0  0  0  0
  8 37  1  0  0  0  0
  8 38  1  0  0  0  0
  9 39  1  0  0  0  0
  9 40  1  0  0  0  0
 10 41  1  0  0  0  0
 10 42  1  0  0  0  0
 11 43  1  0  0  0  0
 11 44  1  0  0  0  0
 12 45  1  0  0  0  0
 12 46  1  0  0  0  0
 13 47  1  0  0  0  0
 13 48  1  0  0  0  0
 15 49  1  0  0  0  0
 15 50  1  0  0  0  0
 16 51  1  0  0  0  0
 18 52  1  0  0  0  0
 19 53  1  0  0  0  0
 19 54  1  0  0  0  0
 20 55  1  0  0  0  0
 20 56  1  0  0  0  0
 20 57  1  0  0  0  0
 21 58  1  0  0  0  0
 21 59  1  0  0  0  0
 21 60  1  0  0  0  0
M  END
$$$$
98
  Mrv2314 01052423262D          

 20 20  0  0  0  0            999 V2000
    0.7145    2.0625    0.0000 C   0  0  0  0  0  0  0  0  0  0  0  0
    0.7145    1.2375    0.0000 C   0  0  0  0  0  0  0  0  0  0  0  0
    1.4289    0.8250    0.0000 C   0  0  0  0  0  0  0  0  0  0  0  0
    1.4289   -0.0000    0.0000 C   0  0  0  0  0  0  0  0  0  0  0  0
    0.7145   -0.4125    0.0000 C   0  0  0  0  0  0  0  0  0  0  0  0
    0.0000    0.0000    0.0000 C   0  0  0  0  0  0  0  0  0  0  0  0
    0.0000    0.8250    0.0000 C   0  0  0  0  0  0  0  0  0  0  0  0
    2.1434   -0.4125    0.0000 C   0  0  0  0  0  0  0  0  0  0  0  0
    2.1434    1.2375    0.0000 N   0  0  0  0  0  0  0  0  0  0  0  0
    1.5395    2.0625    0.0000 H   0  0  0  0  0  0  0  0  0  0  0  0
    0.7145    2.8875    0.0000 H   0  0  0  0  0  0  0  0  0  0  0  0
   -0.1105    2.0625    0.0000 H   0  0  0  0  0  0  0  0  0  0  0  0
    0.7145   -1.2375    0.0000 H   0  0  0  0  0  0  0  0  0  0  0  0
   -0.7145   -0.4125    0.0000 H   0  0  0  0  0  0  0  0  0  0  0  0
   -0.7145    1.2375    0.0000 H   0  0  0  0  0  0  0  0  0  0  0  0
    1.7309   -1.1270    0.0000 H   0  0  0  0  0  0  0  0  0  0  0  0
    2.8579   -0.8250    0.0000 H   0  0  0  0  0  0  0  0  0  0  0  0
    2.5559    0.3020    0.0000 H   0  0  0  0  0  0  0  0  0  0  0  0
    2.8579    0.8250    0.0000 H   0  0  0  0  0  0  0  0  0  0  0  0
    2.1434    2.0625    0.0000 H   0  0  0  0  0  0  0  0  0  0  0  0
  1  2  1  0  0  0  0
  2  3  4  0  0  0  0
  3  4  4  0  0  0  0
  4  5  4  0  0  0  0
  5  6  4  0  0  0  0
  6  7  4  0  0  0  0
  2  7  4  0  0  0  0
  4  8  1  0  0  0  0
  3  9  1  0  0  0  0
  1 10  1  0  0  0  0
  1 11  1  0  0  0  0
  1 12  1  0  0  0  0
  5 13  1  0  0  0  0
  6 14  1  0  0  0  0
  7 15  1  0  0  0  0
  8 16  1  0  0  0  0
  8 17  1  0  0  0  0
  8 18  1  0  0  0  0
  9 19  1  0  0  0  0
  9 20  1  0  0  0  0
M  END
$$$$
99
  Mrv2314 01052423262D          

 19 19  0  0  0  0            999 V2000
    0.7145    2.0625    0.0000 C   0  0  0  0  0  0  0  0  0  0  0  0
    0.7145    1.2375    0.0000 C   0  0  0  0  0  0  0  0  0  0  0  0
    1.4289    0.8250    0.0000 C   0  0  0  0  0  0  0  0  0  0  0  0
    1.4289   -0.0000    0.0000 C   0  0  0  0  0  0  0  0  0  0  0  0
    0.7145   -0.4125    0.0000 C   0  0  0  0  0  0  0  0  0  0  0  0
    0.0000    0.0000    0.0000 C   0  0  0  0  0  0  0  0  0  0  0  0
    0.0000    0.8250    0.0000 C   0  0  0  0  0  0  0  0  0  0  0  0
    2.1434   -0.4125    0.0000 C   0  0  0  0  0  0  0  0  0  0  0  0
    2.1434    1.2375    0.0000 O   0  0  0  0  0  0  0  0  0  0  0  0
    1.5395    2.0625    0.0000 H   0  0  0  0  0  0  0  0  0  0  0  0
    0.7145    2.8875    0.0000 H   0  0  0  0  0  0  0  0  0  0  0  0
   -0.1105    2.0625    0.0000 H   0  0  0  0  0  0  0  0  0  0  0  0
    0.7145   -1.2375    0.0000 H   0  0  0  0  0  0  0  0  0  0  0  0
   -0.7145   -0.4125    0.0000 H   0  0  0  0  0  0  0  0  0  0  0  0
   -0.7145    1.2375    0.0000 H   0  0  0  0  0  0  0  0  0  0  0  0
    1.7309   -1.1270    0.0000 H   0  0  0  0  0  0  0  0  0  0  0  0
    2.8579   -0.8250    0.0000 H   0  0  0  0  0  0  0  0  0  0  0  0
    2.5559    0.3020    0.0000 H   0  0  0  0  0  0  0  0  0  0  0  0
    2.8579    0.8250    0.0000 H   0  0  0  0  0  0  0  0  0  0  0  0
  1  2  1  0  0  0  0
  2  3  4  0  0  0  0
  3  4  4  0  0  0  0
  4  5  4  0  0  0  0
  5  6  4  0  0  0  0
  6  7  4  0  0  0  0
  2  7  4  0  0  0  0
  4  8  1  0  0  0  0
  3  9  1  0  0  0  0
  1 10  1  0  0  0  0
  1 11  1  0  0  0  0
  1 12  1  0  0  0  0
  5 13  1  0  0  0  0
  6 14  1  0  0  0  0
  7 15  1  0  0  0  0
  8 16  1  0  0  0  0
  8 17  1  0  0  0  0
  8 18  1  0  0  0  0
  9 19  1  0  0  0  0
M  END
$$$$
100
  Mrv2314 01052423262D          

 19 19  0  0  0  0            999 V2000
    0.7145    2.0625    0.0000 C   0  0  0  0  0  0  0  0  0  0  0  0
    0.7145    1.2375    0.0000 C   0  0  0  0  0  0  0  0  0  0  0  0
    1.4289    0.8250    0.0000 C   0  0  0  0  0  0  0  0  0  0  0  0
    1.4289   -0.0000    0.0000 C   0  0  0  0  0  0  0  0  0  0  0  0
    0.7145   -0.4125    0.0000 C   0  0  0  0  0  0  0  0  0  0  0  0
    0.0000    0.0000    0.0000 C   0  0  0  0  0  0  0  0  0  0  0  0
    0.0000    0.8250    0.0000 C   0  0  0  0  0  0  0  0  0  0  0  0
   -0.7145    1.2375    0.0000 N   0  3  0  0  0  0  0  0  0  0  0  0
   -1.4289    0.8250    0.0000 O   0  0  0  0  0  0  0  0  0  0  0  0
   -0.7145    2.0625    0.0000 O   0  5  0  0  0  0  0  0  0  0  0  0
    2.1434    1.2375    0.0000 N   0  3  0  0  0  0  0  0  0  0  0  0
    2.1434    2.0625    0.0000 O   0  0  0  0  0  0  0  0  0  0  0  0
    2.8579    0.8250    0.0000 O   0  5  0  0  0  0  0  0  0  0  0  0
    1.5395    2.0625    0.0000 H   0  0  0  0  0  0  0  0  0  0  0  0
    0.7145    2.8875    0.0000 H   0  0  0  0  0  0  0  0  0  0  0  0
   -0.1105    2.0625    0.0000 H   0  0  0  0  0  0  0  0  0  0  0  0
    2.1434   -0.4125    0.0000 H   0  0  0  0  0  0  0  0  0  0  0  0
    0.7145   -1.2375    0.0000 H   0  0  0  0  0  0  0  0  0  0  0  0
   -0.7145   -0.4125    0.0000 H   0  0  0  0  0  0  0  0  0  0  0  0
  1  2  1  0  0  0  0
  2  3  4  0  0  0  0
  3  4  4  0  0  0  0
  4  5  4  0  0  0  0
  5  6  4  0  0  0  0
  6  7  4  0  0  0  0
  2  7  4  0  0  0  0
  7  8  1  0  0  0  0
  8  9  2  0  0  0  0
  8 10  1  0  0  0  0
  3 11  1  0  0  0  0
 11 12  2  0  0  0  0
 11 13  1  0  0  0  0
  1 14  1  0  0  0  0
  1 15  1  0  0  0  0
  1 16  1  0  0  0  0
  4 17  1  0  0  0  0
  5 18  1  0  0  0  0
  6 19  1  0  0  0  0
M  CHG  4   8   1  10  -1  11   1  13  -1
M  END
$$$$
101
  Mrv2314 01052423262D          

 48 48  0  0  0  0            999 V2000
    0.7145    2.8875    0.0000 C   0  0  0  0  0  0  0  0  0  0  0  0
    0.7145    2.0625    0.0000 C   0  0  0  0  0  0  0  0  0  0  0  0
   -0.1105    2.0625    0.0000 C   0  0  0  0  0  0  0  0  0  0  0  0
    1.5395    2.0625    0.0000 C   0  0  0  0  0  0  0  0  0  0  0  0
    0.7145    1.2375    0.0000 C   0  0  0  0  0  0  0  0  0  0  0  0
    1.4289    0.8250    0.0000 C   0  0  0  0  0  0  0  0  0  0  0  0
    1.4289   -0.0000    0.0000 C   0  0  0  0  0  0  0  0  0  0  0  0
    0.7145   -0.4125    0.0000 C   0  0  0  0  0  0  0  0  0  0  0  0
    0.0000    0.0000    0.0000 C   0  0  0  0  0  0  0  0  0  0  0  0
    0.0000    0.8250    0.0000 C   0  0  0  0  0  0  0  0  0  0  0  0
   -0.7145    1.2375    0.0000 O   0  0  0  0  0  0  0  0  0  0  0  0
   -0.7145   -0.4125    0.0000 C   0  0  0  0  0  0  0  0  0  0  0  0
   -1.4289   -0.8250    0.0000 C   0  0  0  0  0  0  0  0  0  0  0  0
   -1.1270    0.3020    0.0000 C   0  0  0  0  0  0  0  0  0  0  0  0
   -0.3020   -1.1270    0.0000 C   0  0  0  0  0  0  0  0  0  0  0  0
    2.1434   -0.4125    0.0000 C   0  0  0  0  0  0  0  0  0  0  0  0
    2.1434   -1.2375    0.0000 N   0  0  0  0  0  0  0  0  0  0  0  0
    2.8579   -1.6500    0.0000 C   0  0  0  0  0  0  0  0  0  0  0  0
    1.4289   -1.6500    0.0000 C   0  0  0  0  0  0  0  0  0  0  0  0
    1.5395    2.8875    0.0000 H   0  0  0  0  0  0  0  0  0  0  0  0
    0.7145    3.7125    0.0000 H   0  0  0  0  0  0  0  0  0  0  0  0
   -0.1105    2.8875    0.0000 H   0  0  0  0  0  0  0  0  0  0  0  0
   -0.8727    2.3782    0.0000 H   0  0  0  0  0  0  0  0  0  0  0  0
   -0.6939    1.4791    0.0000 H   0  0  0  0  0  0  0  0  0  0  0  0
    0.2052    1.3003    0.0000 H   0  0  0  0  0  0  0  0  0  0  0  0
    1.2238    1.3003    0.0000 H   0  0  0  0  0  0  0  0  0  0  0  0
    2.1228    1.4791    0.0000 H   0  0  0  0  0  0  0  0  0  0  0  0
    2.3017    2.3782    0.0000 H   0  0  0  0  0  0  0  0  0  0  0  0
    2.1864    0.4981    0.0000 H   0  0  0  0  0  0  0  0  0  0  0  0
    0.7145   -1.2375    0.0000 H   0  0  0  0  0  0  0  0  0  0  0  0
   -1.4458    0.8557    0.0000 H   0  0  0  0  0  0  0  0  0  0  0  0
   -1.8414   -0.1105    0.0000 H   0  0  0  0  0  0  0  0  0  0  0  0
   -2.1434   -1.2375    0.0000 H   0  0  0  0  0  0  0  0  0  0  0  0
   -1.0164   -1.5395    0.0000 H   0  0  0  0  0  0  0  0  0  0  0  0
   -0.3020    0.3017    0.0000 H   0  0  0  0  0  0  0  0  0  0  0  0
   -0.7139    1.0161    0.0000 H   0  0  0  0  0  0  0  0  0  0  0  0
   -1.9237    0.5160    0.0000 H   0  0  0  0  0  0  0  0  0  0  0  0
   -0.1943   -1.9449    0.0000 H   0  0  0  0  0  0  0  0  0  0  0  0
    0.4949   -1.3405    0.0000 H   0  0  0  0  0  0  0  0  0  0  0  0
    0.2003   -0.4725    0.0000 H   0  0  0  0  0  0  0  0  0  0  0  0
    2.8513   -0.8362    0.0000 H   0  0  0  0  0  0  0  0  0  0  0  0
    2.8705   -0.0227    0.0000 H   0  0  0  0  0  0  0  0  0  0  0  0
    2.2757   -2.2345    0.0000 H   0  0  0  0  0  0  0  0  0  0  0  0
    3.2733   -2.3628    0.0000 H   0  0  0  0  0  0  0  0  0  0  0  0
    3.6535   -1.4316    0.0000 H   0  0  0  0  0  0  0  0  0  0  0  0
    0.7145   -2.0625    0.0000 H   0  0  0  0  0  0  0  0  0  0  0  0
    1.4289   -2.4750    0.0000 H   0  0  0  0  0  0  0  0  0  0  0  0
    2.1434   -2.0625    0.0000 H   0  0  0  0  0  0  0  0  0  0  0  0
  1  2  1  0  0  0  0
  2  3  1  0  0  0  0
  2  4  1  0  0  0  0
  2  5  1  0  0  0  0
  5  6  4  0  0  0  0
  6  7  4  0  0  0  0
  7  8  4  0  0  0  0
  8  9  4  0  0  0  0
  9 10  4  0  0  0  0
  5 10  4  0  0  0  0
 10 11  1  0  0  0  0
  9 12  1  0  0  0  0
 12 13  1  0  0  0  0
 12 14  1  0  0  0  0
 12 15  1  0  0  0  0
  7 16  1  0  0  0  0
 16 17  1  0  0  0  0
 17 18  1  0  0  0  0
 17 19  1  0  0  0  0
  1 20  1  0  0  0  0
  1 21  1  0  0  0  0
  1 22  1  0  0  0  0
  3 23  1  0  0  0  0
  3 24  1  0  0  0  0
  3 25  1  0  0  0  0
  4 26  1  0  0  0  0
  4 27  1  0  0  0  0
  4 28  1  0  0  0  0
  6 29  1  0  0  0  0
  8 30  1  0  0  0  0
 11 31  1  0  0  0  0
 13 32  1  0  0  0  0
 13 33  1  0  0  0  0
 13 34  1  0  0  0  0
 14 35  1  0  0  0  0
 14 36  1  0  0  0  0
 14 37  1  0  0  0  0
 15 38  1  0  0  0  0
 15 39  1  0  0  0  0
 15 40  1  0  0  0  0
 16 41  1  0  0  0  0
 16 42  1  0  0  0  0
 18 43  1  0  0  0  0
 18 44  1  0  0  0  0
 18 45  1  0  0  0  0
 19 46  1  0  0  0  0
 19 47  1  0  0  0  0
 19 48  1  0  0  0  0
M  END
$$$$
102
  Mrv2314 01052423262D          

 37 37  0  0  0  0            999 V2000
    0.7145    2.8875    0.0000 C   0  0  0  0  0  0  0  0  0  0  0  0
    0.7145    2.0625    0.0000 C   0  0  0  0  0  0  0  0  0  0  0  0
   -0.1105    2.0625    0.0000 C   0  0  0  0  0  0  0  0  0  0  0  0
    1.5395    2.0625    0.0000 C   0  0  0  0  0  0  0  0  0  0  0  0
    0.7145    1.2375    0.0000 C   0  0  0  0  0  0  0  0  0  0  0  0
    1.4289    0.8250    0.0000 C   0  0  0  0  0  0  0  0  0  0  0  0
    1.4289   -0.0000    0.0000 C   0  0  0  0  0  0  0  0  0  0  0  0
    0.7145   -0.4125    0.0000 C   0  0  0  0  0  0  0  0  0  0  0  0
    0.0000    0.0000    0.0000 C   0  0  0  0  0  0  0  0  0  0  0  0
    0.0000    0.8250    0.0000 C   0  0  0  0  0  0  0  0  0  0  0  0
    2.1434   -0.4125    0.0000 C   0  0  0  0  0  0  0  0  0  0  0  0
    2.8579   -0.8250    0.0000 C   0  0  0  0  0  0  0  0  0  0  0  0
    1.7309   -1.1270    0.0000 C   0  0  0  0  0  0  0  0  0  0  0  0
    2.5559    0.3020    0.0000 C   0  0  0  0  0  0  0  0  0  0  0  0
    2.1434    1.2375    0.0000 O   0  0  0  0  0  0  0  0  0  0  0  0
    1.5395    2.8875    0.0000 H   0  0  0  0  0  0  0  0  0  0  0  0
    0.7145    3.7125    0.0000 H   0  0  0  0  0  0  0  0  0  0  0  0
   -0.1105    2.8875    0.0000 H   0  0  0  0  0  0  0  0  0  0  0  0
   -0.8727    2.3782    0.0000 H   0  0  0  0  0  0  0  0  0  0  0  0
   -0.6939    1.4791    0.0000 H   0  0  0  0  0  0  0  0  0  0  0  0
    0.2052    1.3003    0.0000 H   0  0  0  0  0  0  0  0  0  0  0  0
    1.2238    1.3003    0.0000 H   0  0  0  0  0  0  0  0  0  0  0  0
    2.1228    1.4791    0.0000 H   0  0  0  0  0  0  0  0  0  0  0  0
    2.3017    2.3782    0.0000 H   0  0  0  0  0  0  0  0  0  0  0  0
    0.7145   -1.2375    0.0000 H   0  0  0  0  0  0  0  0  0  0  0  0
   -0.7145   -0.4125    0.0000 H   0  0  0  0  0  0  0  0  0  0  0  0
   -0.7575    0.4981    0.0000 H   0  0  0  0  0  0  0  0  0  0  0  0
    2.4454   -1.5395    0.0000 H   0  0  0  0  0  0  0  0  0  0  0  0
    3.5724   -1.2375    0.0000 H   0  0  0  0  0  0  0  0  0  0  0  0
    3.2704   -0.1105    0.0000 H   0  0  0  0  0  0  0  0  0  0  0  0
    1.2287   -0.4725    0.0000 H   0  0  0  0  0  0  0  0  0  0  0  0
    0.9340   -1.3405    0.0000 H   0  0  0  0  0  0  0  0  0  0  0  0
    1.6232   -1.9449    0.0000 H   0  0  0  0  0  0  0  0  0  0  0  0
    3.2104    0.8042    0.0000 H   0  0  0  0  0  0  0  0  0  0  0  0
    2.3424    1.0989    0.0000 H   0  0  0  0  0  0  0  0  0  0  0  0
    1.7380    0.4097    0.0000 H   0  0  0  0  0  0  0  0  0  0  0  0
    2.8579    1.6500    0.0000 H   0  0  0  0  0  0  0  0  0  0  0  0
  1  2  1  0  0  0  0
  2  3  1  0  0  0  0
  2  4  1  0  0  0  0
  2  5  1  0  0  0  0
  5  6  4  0  0  0  0
  6  7  4  0  0  0  0
  7  8  4  0  0  0  0
  8  9  4  0  0  0  0
  9 10  4  0  0  0  0
  5 10  4  0  0  0  0
  7 11  1  0  0  0  0
 11 12  1  0  0  0  0
 11 13  1  0  0  0  0
 11 14  1  0  0  0  0
  6 15  1  0  0  0  0
  1 16  1  0  0  0  0
  1 17  1  0  0  0  0
  1 18  1  0  0  0  0
  3 19  1  0  0  0  0
  3 20  1  0  0  0  0
  3 21  1  0  0  0  0
  4 22  1  0  0  0  0
  4 23  1  0  0  0  0
  4 24  1  0  0  0  0
  8 25  1  0  0  0  0
  9 26  1  0  0  0  0
 10 27  1  0  0  0  0
 12 28  1  0  0  0  0
 12 29  1  0  0  0  0
 12 30  1  0  0  0  0
 13 31  1  0  0  0  0
 13 32  1  0  0  0  0
 13 33  1  0  0  0  0
 14 34  1  0  0  0  0
 14 35  1  0  0  0  0
 14 36  1  0  0  0  0
 15 37  1  0  0  0  0
M  END
$$$$
103
  Mrv2314 01052423262D          

 27 28  0  0  0  0            999 V2000
    2.1434   -1.2375    0.0000 C   0  0  0  0  0  0  0  0  0  0  0  0
    2.8579   -1.6500    0.0000 C   0  0  0  0  0  0  0  0  0  0  0  0
    2.8579   -2.4750    0.0000 C   0  0  0  0  0  0  0  0  0  0  0  0
    2.1434   -2.8875    0.0000 C   0  0  0  0  0  0  0  0  0  0  0  0
    1.4289   -2.4750    0.0000 C   0  0  0  0  0  0  0  0  0  0  0  0
    1.4289   -1.6500    0.0000 C   0  0  0  0  0  0  0  0  0  0  0  0
    0.7145   -2.8875    0.0000 C   0  0  0  0  0  0  0  0  0  0  0  0
    0.0000   -2.4750    0.0000 C   0  0  0  0  0  0  0  0  0  0  0  0
   -0.7145   -2.8875    0.0000 C   0  0  0  0  0  0  0  0  0  0  0  0
   -1.4289   -2.4750    0.0000 C   0  0  0  0  0  0  0  0  0  0  0  0
   -1.4289   -1.6500    0.0000 C   0  0  0  0  0  0  0  0  0  0  0  0
   -0.7145   -1.2375    0.0000 C   0  0  0  0  0  0  0  0  0  0  0  0
    0.0000   -1.6500    0.0000 C   0  0  0  0  0  0  0  0  0  0  0  0
   -2.1434   -1.2375    0.0000 O   0  0  0  0  0  0  0  0  0  0  0  0
    2.1434   -3.7125    0.0000 O   0  0  0  0  0  0  0  0  0  0  0  0
    2.1434   -0.4125    0.0000 H   0  0  0  0  0  0  0  0  0  0  0  0
    3.5724   -1.2375    0.0000 H   0  0  0  0  0  0  0  0  0  0  0  0
    3.5724   -2.8875    0.0000 H   0  0  0  0  0  0  0  0  0  0  0  0
    0.7145   -1.2375    0.0000 H   0  0  0  0  0  0  0  0  0  0  0  0
    0.3442   -3.6247    0.0000 H   0  0  0  0  0  0  0  0  0  0  0  0
    1.0847   -3.6247    0.0000 H   0  0  0  0  0  0  0  0  0  0  0  0
   -0.7145   -3.7125    0.0000 H   0  0  0  0  0  0  0  0  0  0  0  0
   -2.1434   -2.8875    0.0000 H   0  0  0  0  0  0  0  0  0  0  0  0
   -0.7145   -0.4125    0.0000 H   0  0  0  0  0  0  0  0  0  0  0  0
    0.7145   -2.0625    0.0000 H   0  0  0  0  0  0  0  0  0  0  0  0
   -2.1434   -0.4125    0.0000 H   0  0  0  0  0  0  0  0  0  0  0  0
    1.4289   -4.1250    0.0000 H   0  0  0  0  0  0  0  0  0  0  0  0
  1  2  4  0  0  0  0
  2  3  4  0  0  0  0
  3  4  4  0  0  0  0
  4  5  4  0  0  0  0
  5  6  4  0  0  0  0
  1  6  4  0  0  0  0
  5  7  1  0  0  0  0
  7  8  1  0  0  0  0
  8  9  4  0  0  0  0
  9 10  4  0  0  0  0
 10 11  4  0  0  0  0
 11 12  4  0  0  0  0
 12 13  4  0  0  0  0
  8 13  4  0  0  0  0
 11 14  1  0  0  0  0
  4 15  1  0  0  0  0
  1 16  1  0  0  0  0
  2 17  1  0  0  0  0
  3 18  1  0  0  0  0
  6 19  1  0  0  0  0
  7 20  1  0  0  0  0
  7 21  1  0  0  0  0
  9 22  1  0  0  0  0
 10 23  1  0  0  0  0
 12 24  1  0  0  0  0
 13 25  1  0  0  0  0
 14 26  1  0  0  0  0
 15 27  1  0  0  0  0
M  END
$$$$
104
  Mrv2314 01052423262D          

 30 29  0  0  0  0            999 V2000
    3.5211    2.8579    0.0000 C   0  0  0  0  0  0  0  0  0  0  0  0
    4.2355    3.2704    0.0000 C   0  0  0  0  0  0  0  0  0  0  0  0
    4.9500    2.8579    0.0000 O   0  0  0  0  0  0  0  0  0  0  0  0
    5.6645    3.2704    0.0000 C   0  0  0  0  0  0  0  0  0  0  0  0
    6.3789    2.8579    0.0000 C   0  0  0  0  0  0  0  0  0  0  0  0
    7.0934    3.2704    0.0000 O   0  0  0  0  0  0  0  0  0  0  0  0
    7.8079    2.8579    0.0000 C   0  0  0  0  0  0  0  0  0  0  0  0
    8.5224    3.2704    0.0000 C   0  0  0  0  0  0  0  0  0  0  0  0
    9.2368    2.8579    0.0000 O   0  0  0  0  0  0  0  0  0  0  0  0
    9.9513    3.2704    0.0000 C   0  0  0  0  0  0  0  0  0  0  0  0
   10.6658    2.8579    0.0000 C   0  0  0  0  0  0  0  0  0  0  0  0
   11.3802    3.2704    0.0000 O   0  0  0  0  0  0  0  0  0  0  0  0
    3.1086    3.5724    0.0000 H   0  0  0  0  0  0  0  0  0  0  0  0
    2.8066    2.4454    0.0000 H   0  0  0  0  0  0  0  0  0  0  0  0
    3.9336    2.1434    0.0000 H   0  0  0  0  0  0  0  0  0  0  0  0
    4.6058    4.0076    0.0000 H   0  0  0  0  0  0  0  0  0  0  0  0
    3.8653    4.0076    0.0000 H   0  0  0  0  0  0  0  0  0  0  0  0
    6.0347    4.0076    0.0000 H   0  0  0  0  0  0  0  0  0  0  0  0
    5.2942    4.0076    0.0000 H   0  0  0  0  0  0  0  0  0  0  0  0
    6.0087    2.1206    0.0000 H   0  0  0  0  0  0  0  0  0  0  0  0
    6.7492    2.1206    0.0000 H   0  0  0  0  0  0  0  0  0  0  0  0
    7.4376    2.1206    0.0000 H   0  0  0  0  0  0  0  0  0  0  0  0
    8.1781    2.1206    0.0000 H   0  0  0  0  0  0  0  0  0  0  0  0
    8.8926    4.0076    0.0000 H   0  0  0  0  0  0  0  0  0  0  0  0
    8.1521    4.0076    0.0000 H   0  0  0  0  0  0  0  0  0  0  0  0
   10.3216    4.0076    0.0000 H   0  0  0  0  0  0  0  0  0  0  0  0
    9.5810    4.0076    0.0000 H   0  0  0  0  0  0  0  0  0  0  0  0
   10.2955    2.1206    0.0000 H   0  0  0  0  0  0  0  0  0  0  0  0
   11.0360    2.1206    0.0000 H   0  0  0  0  0  0  0  0  0  0  0  0
   12.0947    2.8579    0.0000 H   0  0  0  0  0  0  0  0  0  0  0  0
  1  2  1  0  0  0  0
  2  3  1  0  0  0  0
  3  4  1  0  0  0  0
  4  5  1  0  0  0  0
  5  6  1  0  0  0  0
  6  7  1  0  0  0  0
  7  8  1  0  0  0  0
  8  9  1  0  0  0  0
  9 10  1  0  0  0  0
 10 11  1  0  0  0  0
 11 12  1  0  0  0  0
  1 13  1  0  0  0  0
  1 14  1  0  0  0  0
  1 15  1  0  0  0  0
  2 16  1  0  0  0  0
  2 17  1  0  0  0  0
  4 18  1  0  0  0  0
  4 19  1  0  0  0  0
  5 20  1  0  0  0  0
  5 21  1  0  0  0  0
  7 22  1  0  0  0  0
  7 23  1  0  0  0  0
  8 24  1  0  0  0  0
  8 25  1  0  0  0  0
 10 26  1  0  0  0  0
 10 27  1  0  0  0  0
 11 28  1  0  0  0  0
 11 29  1  0  0  0  0
 12 30  1  0  0  0  0
M  END
$$$$
105
  Mrv2314 01052423262D          

 42 43  0  0  0  0            999 V2000
   -1.4289    0.8250    0.0000 C   0  0  0  0  0  0  0  0  0  0  0  0
   -1.4289    0.0000    0.0000 C   0  0  0  0  0  0  0  0  0  0  0  0
   -0.7145   -0.4125    0.0000 N   0  0  0  0  0  0  0  0  0  0  0  0
    0.0000    0.0000    0.0000 C   0  0  0  0  0  0  0  0  0  0  0  0
    0.7145   -0.4125    0.0000 C   0  0  0  0  0  0  0  0  0  0  0  0
   -0.7145   -1.2375    0.0000 C   0  0  0  0  0  0  0  0  0  0  0  0
   -1.4289   -1.6500    0.0000 C   0  0  0  0  0  0  0  0  0  0  0  0
   -1.4289   -2.4750    0.0000 C   0  0  0  0  0  0  0  0  0  0  0  0
   -0.7145   -2.8875    0.0000 C   0  0  0  0  0  0  0  0  0  0  0  0
    0.0000   -2.4750    0.0000 C   0  0  0  0  0  0  0  0  0  0  0  0
    0.0000   -1.6500    0.0000 C   0  0  0  0  0  0  0  0  0  0  0  0
   -0.7145   -3.7125    0.0000 C   0  0  0  0  0  0  0  0  0  0  0  0
   -1.4289   -4.1250    0.0000 O   0  0  0  0  0  0  0  0  0  0  0  0
    0.0000   -4.1250    0.0000 C   0  0  0  0  0  0  0  0  0  0  0  0
    0.7145   -3.7125    0.0000 C   0  0  0  0  0  0  0  0  0  0  0  0
    1.4289   -4.1250    0.0000 C   0  0  0  0  0  0  0  0  0  0  0  0
    1.4289   -4.9500    0.0000 C   0  0  0  0  0  0  0  0  0  0  0  0
    0.7145   -5.3625    0.0000 C   0  0  0  0  0  0  0  0  0  0  0  0
    0.0000   -4.9500    0.0000 C   0  0  0  0  0  0  0  0  0  0  0  0
   -0.7145   -5.3625    0.0000 C   0  0  0  0  0  0  0  0  0  0  0  0
   -1.4289   -4.9500    0.0000 O   0  0  0  0  0  0  0  0  0  0  0  0
   -0.7145   -6.1875    0.0000 O   0  0  0  0  0  0  0  0  0  0  0  0
   -2.1434   -2.8875    0.0000 O   0  0  0  0  0  0  0  0  0  0  0  0
   -0.6039    0.8250    0.0000 H   0  0  0  0  0  0  0  0  0  0  0  0
   -1.4289    1.6500    0.0000 H   0  0  0  0  0  0  0  0  0  0  0  0
   -2.2539    0.8250    0.0000 H   0  0  0  0  0  0  0  0  0  0  0  0
   -2.2525   -0.0480    0.0000 H   0  0  0  0  0  0  0  0  0  0  0  0
   -1.8823   -0.6893    0.0000 H   0  0  0  0  0  0  0  0  0  0  0  0
    0.3703    0.7372    0.0000 H   0  0  0  0  0  0  0  0  0  0  0  0
   -0.3703    0.7372    0.0000 H   0  0  0  0  0  0  0  0  0  0  0  0
    0.3020   -1.1270    0.0000 H   0  0  0  0  0  0  0  0  0  0  0  0
    1.4289   -0.8250    0.0000 H   0  0  0  0  0  0  0  0  0  0  0  0
    1.1270    0.3020    0.0000 H   0  0  0  0  0  0  0  0  0  0  0  0
   -2.1434   -1.2375    0.0000 H   0  0  0  0  0  0  0  0  0  0  0  0
    0.7145   -2.8875    0.0000 H   0  0  0  0  0  0  0  0  0  0  0  0
    0.7969   -1.8635    0.0000 H   0  0  0  0  0  0  0  0  0  0  0  0
    0.0000   -3.3000    0.0000 H   0  0  0  0  0  0  0  0  0  0  0  0
    2.1434   -3.7125    0.0000 H   0  0  0  0  0  0  0  0  0  0  0  0
    2.1434   -5.3625    0.0000 H   0  0  0  0  0  0  0  0  0  0  0  0
    0.7145   -6.1875    0.0000 H   0  0  0  0  0  0  0  0  0  0  0  0
   -1.4289   -6.6000    0.0000 H   0  0  0  0  0  0  0  0  0  0  0  0
   -2.8579   -2.4750    0.0000 H   0  0  0  0  0  0  0  0  0  0  0  0
  1  2  1  0  0  0  0
  2  3  1  0  0  0  0
  3  4  1  0  0  0  0
  4  5  1  0  0  0  0
  3  6  1  0  0  0  0
  6  7  4  0  0  0  0
  7  8  4  0  0  0  0
  8  9  4  0  0  0  0
  9 10  4  0  0  0  0
 10 11  4  0  0  0  0
  6 11  4  0  0  0  0
  9 12  1  0  0  0  0
 12 13  2  0  0  0  0
 12 14  1  0  0  0  0
 14 15  4  0  0  0  0
 15 16  4  0  0  0  0
 16 17  4  0  0  0  0
 17 18  4  0  0  0  0
 18 19  4  0  0  0  0
 14 19  4  0  0  0  0
 19 20  1  0  0  0  0
 20 21  2  0  0  0  0
 20 22  1  0  0  0  0
  8 23  1  0  0  0  0
  1 24  1  0  0  0  0
  1 25  1  0  0  0  0
  1 26  1  0  0  0  0
  2 27  1  0  0  0  0
  2 28  1  0  0  0  0
  4 29  1  0  0  0  0
  4 30  1  0  0  0  0
  5 31  1  0  0  0  0
  5 32  1  0  0  0  0
  5 33  1  0  0  0  0
  7 34  1  0  0  0  0
 10 35  1  0  0  0  0
 11 36  1  0  0  0  0
 15 37  1  0  0  0  0
 16 38  1  0  0  0  0
 17 39  1  0  0  0  0
 18 40  1  0  0  0  0
 22 41  1  0  0  0  0
 23 42  1  0  0  0  0
M  END
$$$$
106
  Mrv2314 01052423262D          

 26 28  0  0  0  0            999 V2000
    4.2868    0.8250    0.0000 C   0  0  0  0  0  0  0  0  0  0  0  0
    4.2868    0.0000    0.0000 C   0  0  0  0  0  0  0  0  0  0  0  0
    3.5724   -0.4125    0.0000 C   0  0  0  0  0  0  0  0  0  0  0  0
    2.8579    0.0000    0.0000 C   0  0  0  0  0  0  0  0  0  0  0  0
    2.8579    0.8250    0.0000 C   0  0  0  0  0  0  0  0  0  0  0  0
    3.5724    1.2375    0.0000 C   0  0  0  0  0  0  0  0  0  0  0  0
    2.1434    1.2375    0.0000 C   0  0  0  0  0  0  0  0  0  0  0  0
    2.1434    2.0625    0.0000 O   0  0  0  0  0  0  0  0  0  0  0  0
    1.4289    0.8250    0.0000 C   0  0  0  0  0  0  0  0  0  0  0  0
    1.4289    0.0000    0.0000 C   0  0  0  0  0  0  0  0  0  0  0  0
    2.1434   -0.4125    0.0000 C   0  0  0  0  0  0  0  0  0  0  0  0
    2.1434   -1.2375    0.0000 O   0  0  0  0  0  0  0  0  0  0  0  0
    0.7145   -0.4125    0.0000 C   0  0  0  0  0  0  0  0  0  0  0  0
    0.0000   -0.0000    0.0000 C   0  0  0  0  0  0  0  0  0  0  0  0
    0.0000    0.8250    0.0000 C   0  0  0  0  0  0  0  0  0  0  0  0
    0.7145    1.2375    0.0000 C   0  0  0  0  0  0  0  0  0  0  0  0
   -0.7145   -0.4125    0.0000 N   0  0  0  0  0  0  0  0  0  0  0  0
    5.0013    1.2375    0.0000 H   0  0  0  0  0  0  0  0  0  0  0  0
    5.0013   -0.4125    0.0000 H   0  0  0  0  0  0  0  0  0  0  0  0
    3.5724   -1.2375    0.0000 H   0  0  0  0  0  0  0  0  0  0  0  0
    3.5724    2.0625    0.0000 H   0  0  0  0  0  0  0  0  0  0  0  0
    0.7145   -1.2375    0.0000 H   0  0  0  0  0  0  0  0  0  0  0  0
   -0.7145    1.2375    0.0000 H   0  0  0  0  0  0  0  0  0  0  0  0
    0.7145    2.0625    0.0000 H   0  0  0  0  0  0  0  0  0  0  0  0
   -1.4289    0.0000    0.0000 H   0  0  0  0  0  0  0  0  0  0  0  0
   -0.7145   -1.2375    0.0000 H   0  0  0  0  0  0  0  0  0  0  0  0
  1  2  4  0  0  0  0
  2  3  4  0  0  0  0
  3  4  4  0  0  0  0
  4  5  4  0  0  0  0
  5  6  4  0  0  0  0
  1  6  4  0  0  0  0
  5  7  1  0  0  0  0
  7  8  2  0  0  0  0
  7  9  1  0  0  0  0
  9 10  4  0  0  0  0
 10 11  1  0  0  0  0
  4 11  1  0  0  0  0
 11 12  2  0  0  0  0
 10 13  4  0  0  0  0
 13 14  4  0  0  0  0
 14 15  4  0  0  0  0
 15 16  4  0  0  0  0
  9 16  4  0  0  0  0
 14 17  1  0  0  0  0
  1 18  1  0  0  0  0
  2 19  1  0  0  0  0
  3 20  1  0  0  0  0
  6 21  1  0  0  0  0
 13 22  1  0  0  0  0
 15 23  1  0  0  0  0
 16 24  1  0  0  0  0
 17 25  1  0  0  0  0
 17 26  1  0  0  0  0
M  END
$$$$
107
  Mrv2314 01052423262D          

 18 18  0  0  0  0            999 V2000
    0.0000    2.4750    0.0000 C   0  0  0  0  0  0  0  0  0  0  0  0
    0.7145    2.0625    0.0000 O   0  0  0  0  0  0  0  0  0  0  0  0
    0.7145    1.2375    0.0000 C   0  0  0  0  0  0  0  0  0  0  0  0
    1.4289    0.8250    0.0000 C   0  0  0  0  0  0  0  0  0  0  0  0
    1.4289   -0.0000    0.0000 C   0  0  0  0  0  0  0  0  0  0  0  0
    0.7145   -0.4125    0.0000 C   0  0  0  0  0  0  0  0  0  0  0  0
    0.0000    0.0000    0.0000 C   0  0  0  0  0  0  0  0  0  0  0  0
    0.0000    0.8250    0.0000 C   0  0  0  0  0  0  0  0  0  0  0  0
   -0.7145    1.2375    0.0000 N   0  0  0  0  0  0  0  0  0  0  0  0
    0.4125    3.1895    0.0000 H   0  0  0  0  0  0  0  0  0  0  0  0
   -0.7145    2.8875    0.0000 H   0  0  0  0  0  0  0  0  0  0  0  0
   -0.4125    1.7605    0.0000 H   0  0  0  0  0  0  0  0  0  0  0  0
    2.1434    1.2375    0.0000 H   0  0  0  0  0  0  0  0  0  0  0  0
    2.1434   -0.4125    0.0000 H   0  0  0  0  0  0  0  0  0  0  0  0
    0.7145   -1.2375    0.0000 H   0  0  0  0  0  0  0  0  0  0  0  0
   -0.7145   -0.4125    0.0000 H   0  0  0  0  0  0  0  0  0  0  0  0
   -1.5114    1.4510    0.0000 H   0  0  0  0  0  0  0  0  0  0  0  0
   -1.2978    0.6541    0.0000 H   0  0  0  0  0  0  0  0  0  0  0  0
  1  2  1  0  0  0  0
  2  3  1  0  0  0  0
  3  4  4  0  0  0  0
  4  5  4  0  0  0  0
  5  6  4  0  0  0  0
  6  7  4  0  0  0  0
  7  8  4  0  0  0  0
  3  8  4  0  0  0  0
  8  9  1  0  0  0  0
  1 10  1  0  0  0  0
  1 11  1  0  0  0  0
  1 12  1  0  0  0  0
  4 13  1  0  0  0  0
  5 14  1  0  0  0  0
  6 15  1  0  0  0  0
  7 16  1  0  0  0  0
  9 17  1  0  0  0  0
  9 18  1  0  0  0  0
M  END
$$$$
108
  Mrv2314 01052423262D          

 22 21  0  0  0  0            999 V2000
    1.0461    1.4289    0.0000 C   0  0  0  0  0  0  0  0  0  0  0  0
    1.7605    1.8414    0.0000 C   0  0  0  0  0  0  0  0  0  0  0  0
    2.4750    1.4289    0.0000 C   0  0  0  0  0  0  0  0  0  0  0  0
    3.1895    1.8414    0.0000 C   0  0  0  0  0  0  0  0  0  0  0  0
    3.9039    1.4289    0.0000 O   0  0  0  0  0  0  0  0  0  0  0  0
    4.6184    1.8414    0.0000 C   0  0  0  0  0  0  0  0  0  0  0  0
    5.3329    1.4289    0.0000 C   0  0  0  0  0  0  0  0  0  0  0  0
    6.0474    1.8414    0.0000 O   0  0  0  0  0  0  0  0  0  0  0  0
    0.6336    2.1434    0.0000 H   0  0  0  0  0  0  0  0  0  0  0  0
    0.3316    1.0164    0.0000 H   0  0  0  0  0  0  0  0  0  0  0  0
    1.4586    0.7145    0.0000 H   0  0  0  0  0  0  0  0  0  0  0  0
    2.1308    2.5787    0.0000 H   0  0  0  0  0  0  0  0  0  0  0  0
    1.3903    2.5787    0.0000 H   0  0  0  0  0  0  0  0  0  0  0  0
    2.1047    0.6917    0.0000 H   0  0  0  0  0  0  0  0  0  0  0  0
    2.8453    0.6917    0.0000 H   0  0  0  0  0  0  0  0  0  0  0  0
    3.5597    2.5787    0.0000 H   0  0  0  0  0  0  0  0  0  0  0  0
    2.8192    2.5787    0.0000 H   0  0  0  0  0  0  0  0  0  0  0  0
    4.9887    2.5787    0.0000 H   0  0  0  0  0  0  0  0  0  0  0  0
    4.2482    2.5787    0.0000 H   0  0  0  0  0  0  0  0  0  0  0  0
    4.9626    0.6917    0.0000 H   0  0  0  0  0  0  0  0  0  0  0  0
    5.7031    0.6917    0.0000 H   0  0  0  0  0  0  0  0  0  0  0  0
    6.7618    1.4289    0.0000 H   0  0  0  0  0  0  0  0  0  0  0  0
  1  2  1  0  0  0  0
  2  3  1  0  0  0  0
  3  4  1  0  0  0  0
  4  5  1  0  0  0  0
  5  6  1  0  0  0  0
  6  7  1  0  0  0  0
  7  8  1  0  0  0  0
  1  9  1  0  0  0  0
  1 10  1  0  0  0  0
  1 11  1  0  0  0  0
  2 12  1  0  0  0  0
  2 13  1  0  0  0  0
  3 14  1  0  0  0  0
  3 15  1  0  0  0  0
  4 16  1  0  0  0  0
  4 17  1  0  0  0  0
  6 18  1  0  0  0  0
  6 19  1  0  0  0  0
  7 20  1  0  0  0  0
  7 21  1  0  0  0  0
  8 22  1  0  0  0  0
M  END
$$$$
109
  Mrv2314 01052423262D          

 39 38  0  0  0  0            999 V2000
    4.2355    3.2704    0.0000 C   0  0  0  0  0  0  0  0  0  0  0  0
    4.9500    2.8579    0.0000 C   0  0  0  0  0  0  0  0  0  0  0  0
    5.6645    3.2704    0.0000 C   0  0  0  0  0  0  0  0  0  0  0  0
    6.3789    2.8579    0.0000 C   0  0  0  0  0  0  0  0  0  0  0  0
    7.0934    3.2704    0.0000 C   0  0  0  0  0  0  0  0  0  0  0  0
    7.8079    2.8579    0.0000 C   0  0  0  0  0  0  0  0  0  0  0  0
    8.5224    3.2704    0.0000 C   0  0  0  0  0  0  0  0  0  0  0  0
    9.2368    2.8579    0.0000 C   0  0  0  0  0  0  0  0  0  0  0  0
    9.9513    3.2704    0.0000 C   0  0  0  0  0  0  0  0  0  0  0  0
   10.6658    2.8579    0.0000 C   0  0  0  0  0  0  0  0  0  0  0  0
   11.3802    3.2704    0.0000 C   0  0  0  0  0  0  0  0  0  0  0  0
    8.5224    4.0954    0.0000 C   0  0  0  0  0  0  0  0  0  0  0  0
    9.2368    4.5079    0.0000 O   0  0  0  0  0  0  0  0  0  0  0  0
    4.6480    3.9849    0.0000 H   0  0  0  0  0  0  0  0  0  0  0  0
    3.5211    3.6829    0.0000 H   0  0  0  0  0  0  0  0  0  0  0  0
    3.8230    2.5559    0.0000 H   0  0  0  0  0  0  0  0  0  0  0  0
    4.5797    2.1206    0.0000 H   0  0  0  0  0  0  0  0  0  0  0  0
    5.3203    2.1206    0.0000 H   0  0  0  0  0  0  0  0  0  0  0  0
    6.0347    4.0076    0.0000 H   0  0  0  0  0  0  0  0  0  0  0  0
    5.2942    4.0076    0.0000 H   0  0  0  0  0  0  0  0  0  0  0  0
    6.0087    2.1206    0.0000 H   0  0  0  0  0  0  0  0  0  0  0  0
    6.7492    2.1206    0.0000 H   0  0  0  0  0  0  0  0  0  0  0  0
    7.4637    4.0076    0.0000 H   0  0  0  0  0  0  0  0  0  0  0  0
    6.7232    4.0076    0.0000 H   0  0  0  0  0  0  0  0  0  0  0  0
    7.4376    2.1206    0.0000 H   0  0  0  0  0  0  0  0  0  0  0  0
    8.1781    2.1206    0.0000 H   0  0  0  0  0  0  0  0  0  0  0  0
    8.5224    2.4454    0.0000 H   0  0  0  0  0  0  0  0  0  0  0  0
    9.3801    2.0454    0.0000 H   0  0  0  0  0  0  0  0  0  0  0  0
    9.8688    2.3276    0.0000 H   0  0  0  0  0  0  0  0  0  0  0  0
   10.3216    4.0076    0.0000 H   0  0  0  0  0  0  0  0  0  0  0  0
    9.5810    4.0076    0.0000 H   0  0  0  0  0  0  0  0  0  0  0  0
   10.7007    2.0336    0.0000 H   0  0  0  0  0  0  0  0  0  0  0  0
   11.3888    2.4606    0.0000 H   0  0  0  0  0  0  0  0  0  0  0  0
   12.1788    3.0632    0.0000 H   0  0  0  0  0  0  0  0  0  0  0  0
   11.7890    3.9870    0.0000 H   0  0  0  0  0  0  0  0  0  0  0  0
   10.7953    3.8522    0.0000 H   0  0  0  0  0  0  0  0  0  0  0  0
    8.0690    4.7847    0.0000 H   0  0  0  0  0  0  0  0  0  0  0  0
    7.6988    4.1434    0.0000 H   0  0  0  0  0  0  0  0  0  0  0  0
    9.4187    5.3126    0.0000 H   0  0  0  0  0  0  0  0  0  0  0  0
  1  2  1  0  0  0  0
  2  3  1  0  0  0  0
  3  4  1  0  0  0  0
  4  5  1  0  0  0  0
  5  6  1  0  0  0  0
  6  7  1  0  0  0  0
  7  8  1  0  0  0  0
  8  9  1  0  0  0  0
  9 10  1  0  0  0  0
 10 11  1  0  0  0  0
  7 12  1  0  0  0  0
 12 13  1  0  0  0  0
  1 14  1  0  0  0  0
  1 15  1  0  0  0  0
  1 16  1  0  0  0  0
  2 17  1  0  0  0  0
  2 18  1  0  0  0  0
  3 19  1  0  0  0  0
  3 20  1  0  0  0  0
  4 21  1  0  0  0  0
  4 22  1  0  0  0  0
  5 23  1  0  0  0  0
  5 24  1  0  0  0  0
  6 25  1  0  0  0  0
  6 26  1  0  0  0  0
  7 27  1  0  0  0  0
  8 28  1  0  0  0  0
  8 29  1  0  0  0  0
  9 30  1  0  0  0  0
  9 31  1  0  0  0  0
 10 32  1  0  0  0  0
 10 33  1  0  0  0  0
 11 34  1  0  0  0  0
 11 35  1  0  0  0  0
 11 36  1  0  0  0  0
 12 37  1  0  0  0  0
 12 38  1  0  0  0  0
 13 39  1  0  0  0  0
M  END
$$$$
110
  Mrv2314 01052423262D          

 23 24  0  0  0  0            999 V2000
    0.7145   -1.2375    0.0000 C   0  0  0  0  0  0  0  0  0  0  0  0
    1.4289   -1.6500    0.0000 C   0  0  0  0  0  0  0  0  0  0  0  0
    1.4289   -2.4750    0.0000 C   0  0  0  0  0  0  0  0  0  0  0  0
    0.7145   -2.8875    0.0000 C   0  0  0  0  0  0  0  0  0  0  0  0
    0.0000   -2.4750    0.0000 C   0  0  0  0  0  0  0  0  0  0  0  0
    0.0000   -1.6500    0.0000 C   0  0  0  0  0  0  0  0  0  0  0  0
    0.7145   -3.7125    0.0000 C   0  0  0  0  0  0  0  0  0  0  0  0
    1.4289   -4.1250    0.0000 C   0  0  0  0  0  0  0  0  0  0  0  0
    1.4289   -4.9500    0.0000 C   0  0  0  0  0  0  0  0  0  0  0  0
    0.7145   -5.3625    0.0000 C   0  0  0  0  0  0  0  0  0  0  0  0
    0.0000   -4.9500    0.0000 C   0  0  0  0  0  0  0  0  0  0  0  0
    0.0000   -4.1250    0.0000 C   0  0  0  0  0  0  0  0  0  0  0  0
    0.7145   -6.1875    0.0000 O   0  0  0  0  0  0  0  0  0  0  0  0
    2.1434   -5.3625    0.0000 Cl  0  0  0  0  0  0  0  0  0  0  0  0
    0.7145   -0.4125    0.0000 H   0  0  0  0  0  0  0  0  0  0  0  0
    2.1434   -1.2375    0.0000 H   0  0  0  0  0  0  0  0  0  0  0  0
    2.1434   -2.8875    0.0000 H   0  0  0  0  0  0  0  0  0  0  0  0
   -0.7145   -2.8875    0.0000 H   0  0  0  0  0  0  0  0  0  0  0  0
   -0.7145   -1.2375    0.0000 H   0  0  0  0  0  0  0  0  0  0  0  0
    2.1434   -3.7125    0.0000 H   0  0  0  0  0  0  0  0  0  0  0  0
   -0.7145   -5.3625    0.0000 H   0  0  0  0  0  0  0  0  0  0  0  0
   -0.7145   -3.7125    0.0000 H   0  0  0  0  0  0  0  0  0  0  0  0
   -0.0000   -6.6000    0.0000 H   0  0  0  0  0  0  0  0  0  0  0  0
  1  2  4  0  0  0  0
  2  3  4  0  0  0  0
  3  4  4  0  0  0  0
  4  5  4  0  0  0  0
  5  6  4  0  0  0  0
  1  6  4  0  0  0  0
  4  7  1  0  0  0  0
  7  8  4  0  0  0  0
  8  9  4  0  0  0  0
  9 10  4  0  0  0  0
 10 11  4  0  0  0  0
 11 12  4  0  0  0  0
  7 12  4  0  0  0  0
 10 13  1  0  0  0  0
  9 14  1  0  0  0  0
  1 15  1  0  0  0  0
  2 16  1  0  0  0  0
  3 17  1  0  0  0  0
  5 18  1  0  0  0  0
  6 19  1  0  0  0  0
  8 20  1  0  0  0  0
 11 21  1  0  0  0  0
 12 22  1  0  0  0  0
 13 23  1  0  0  0  0
M  END
$$$$
111
  Mrv2314 01052423262D          

 19 19  0  0  0  0            999 V2000
    0.7145    1.2375    0.0000 C   0  0  0  0  0  0  0  0  0  0  0  0
    1.4289    0.8250    0.0000 C   0  0  0  0  0  0  0  0  0  0  0  0
    1.4289   -0.0000    0.0000 C   0  0  0  0  0  0  0  0  0  0  0  0
    0.7145   -0.4125    0.0000 C   0  0  0  0  0  0  0  0  0  0  0  0
    0.0000    0.0000    0.0000 C   0  0  0  0  0  0  0  0  0  0  0  0
    0.0000    0.8250    0.0000 C   0  0  0  0  0  0  0  0  0  0  0  0
    0.7145   -1.2375    0.0000 N   0  0  0  0  0  0  0  0  0  0  0  0
    1.4289   -1.6500    0.0000 C   0  0  0  0  0  0  0  0  0  0  0  0
    2.1434   -1.2375    0.0000 O   0  0  0  0  0  0  0  0  0  0  0  0
    1.4289   -2.4750    0.0000 C   0  0  0  0  0  0  0  0  0  0  0  0
    2.1434   -2.8875    0.0000 Cl  0  0  0  0  0  0  0  0  0  0  0  0
    0.7145    2.0625    0.0000 H   0  0  0  0  0  0  0  0  0  0  0  0
    2.1434    1.2375    0.0000 H   0  0  0  0  0  0  0  0  0  0  0  0
    2.1434   -0.4125    0.0000 H   0  0  0  0  0  0  0  0  0  0  0  0
   -0.7145   -0.4125    0.0000 H   0  0  0  0  0  0  0  0  0  0  0  0
   -0.7145    1.2375    0.0000 H   0  0  0  0  0  0  0  0  0  0  0  0
   -0.0000   -1.6500    0.0000 H   0  0  0  0  0  0  0  0  0  0  0  0
    0.6053   -2.5230    0.0000 H   0  0  0  0  0  0  0  0  0  0  0  0
    0.9756   -3.1643    0.0000 H   0  0  0  0  0  0  0  0  0  0  0  0
  1  2  4  0  0  0  0
  2  3  4  0  0  0  0
  3  4  4  0  0  0  0
  4  5  4  0  0  0  0
  5  6  4  0  0  0  0
  1  6  4  0  0  0  0
  4  7  1  0  0  0  0
  7  8  1  0  0  0  0
  8  9  2  0  0  0  0
  8 10  1  0  0  0  0
 10 11  1  0  0  0  0
  1 12  1  0  0  0  0
  2 13  1  0  0  0  0
  3 14  1  0  0  0  0
  5 15  1  0  0  0  0
  6 16  1  0  0  0  0
  7 17  1  0  0  0  0
 10 18  1  0  0  0  0
 10 19  1  0  0  0  0
M  END
$$$$
112
  Mrv2314 01052423262D          

 23 23  0  0  0  0            999 V2000
    0.0000    3.3000    0.0000 C   0  0  0  0  0  0  0  0  0  0  0  0
    0.0000    2.4750    0.0000 C   0  0  0  0  0  0  0  0  0  0  0  0
    0.7145    2.0625    0.0000 O   0  0  0  0  0  0  0  0  0  0  0  0
    0.7145    1.2375    0.0000 C   0  0  0  0  0  0  0  0  0  0  0  0
    1.4289    0.8250    0.0000 C   0  0  0  0  0  0  0  0  0  0  0  0
    1.4289   -0.0000    0.0000 C   0  0  0  0  0  0  0  0  0  0  0  0
    0.7145   -0.4125    0.0000 C   0  0  0  0  0  0  0  0  0  0  0  0
    0.0000    0.0000    0.0000 C   0  0  0  0  0  0  0  0  0  0  0  0
    0.0000    0.8250    0.0000 C   0  0  0  0  0  0  0  0  0  0  0  0
   -0.7145    1.2375    0.0000 C   0  0  0  0  0  0  0  0  0  0  0  0
   -0.7145    2.0625    0.0000 O   0  0  0  0  0  0  0  0  0  0  0  0
   -1.4289    0.8250    0.0000 N   0  0  0  0  0  0  0  0  0  0  0  0
    0.8250    3.3000    0.0000 H   0  0  0  0  0  0  0  0  0  0  0  0
    0.0000    4.1250    0.0000 H   0  0  0  0  0  0  0  0  0  0  0  0
   -0.8250    3.3000    0.0000 H   0  0  0  0  0  0  0  0  0  0  0  0
   -0.7145    2.8875    0.0000 H   0  0  0  0  0  0  0  0  0  0  0  0
    0.7145    2.8875    0.0000 H   0  0  0  0  0  0  0  0  0  0  0  0
    2.1434    1.2375    0.0000 H   0  0  0  0  0  0  0  0  0  0  0  0
    2.1434   -0.4125    0.0000 H   0  0  0  0  0  0  0  0  0  0  0  0
    0.7145   -1.2375    0.0000 H   0  0  0  0  0  0  0  0  0  0  0  0
   -0.7145   -0.4125    0.0000 H   0  0  0  0  0  0  0  0  0  0  0  0
   -2.1434    1.2375    0.0000 H   0  0  0  0  0  0  0  0  0  0  0  0
   -1.4289    0.0000    0.0000 H   0  0  0  0  0  0  0  0  0  0  0  0
  1  2  1  0  0  0  0
  2  3  1  0  0  0  0
  3  4  1  0  0  0  0
  4  5  4  0  0  0  0
  5  6  4  0  0  0  0
  6  7  4  0  0  0  0
  7  8  4  0  0  0  0
  8  9  4  0  0  0  0
  4  9  4  0  0  0  0
  9 10  1  0  0  0  0
 10 11  2  0  0  0  0
 10 12  1  0  0  0  0
  1 13  1  0  0  0  0
  1 14  1  0  0  0  0
  1 15  1  0  0  0  0
  2 16  1  0  0  0  0
  2 17  1  0  0  0  0
  5 18  1  0  0  0  0
  6 19  1  0  0  0  0
  7 20  1  0  0  0  0
  8 21  1  0  0  0  0
 12 22  1  0  0  0  0
 12 23  1  0  0  0  0
M  END
$$$$
113
  Mrv2314 01052423262D          

 18 18  0  0  0  0            999 V2000
    0.0000    2.4750    0.0000 C   0  0  0  0  0  0  0  0  0  0  0  0
    0.7145    2.0625    0.0000 C   0  0  0  0  0  0  0  0  0  0  0  0
    0.7145    1.2375    0.0000 C   0  0  0  0  0  0  0  0  0  0  0  0
    1.4289    0.8250    0.0000 C   0  0  0  0  0  0  0  0  0  0  0  0
    1.4289   -0.0000    0.0000 C   0  0  0  0  0  0  0  0  0  0  0  0
    2.1434   -0.4125    0.0000 O   0  0  0  0  0  0  0  0  0  0  0  0
    0.7145   -0.4125    0.0000 C   0  0  0  0  0  0  0  0  0  0  0  0
    0.0000    0.0000    0.0000 C   0  0  0  0  0  0  0  0  0  0  0  0
    0.0000    0.8250    0.0000 O   0  0  0  0  0  0  0  0  0  0  0  0
    2.1434    1.2375    0.0000 O   0  0  0  0  0  0  0  0  0  0  0  0
    0.4125    3.1895    0.0000 H   0  0  0  0  0  0  0  0  0  0  0  0
   -0.7145    2.8875    0.0000 H   0  0  0  0  0  0  0  0  0  0  0  0
   -0.4125    1.7605    0.0000 H   0  0  0  0  0  0  0  0  0  0  0  0
    1.5381    2.1105    0.0000 H   0  0  0  0  0  0  0  0  0  0  0  0
    1.1678    2.7518    0.0000 H   0  0  0  0  0  0  0  0  0  0  0  0
    0.7145   -1.2375    0.0000 H   0  0  0  0  0  0  0  0  0  0  0  0
   -0.7145   -0.4125    0.0000 H   0  0  0  0  0  0  0  0  0  0  0  0
    2.8579    0.8250    0.0000 H   0  0  0  0  0  0  0  0  0  0  0  0
  1  2  1  0  0  0  0
  2  3  1  0  0  0  0
  3  4  2  0  0  0  0
  4  5  1  0  0  0  0
  5  6  2  0  0  0  0
  5  7  1  0  0  0  0
  7  8  2  0  0  0  0
  8  9  1  0  0  0  0
  3  9  1  0  0  0  0
  4 10  1  0  0  0  0
  1 11  1  0  0  0  0
  1 12  1  0  0  0  0
  1 13  1  0  0  0  0
  2 14  1  0  0  0  0
  2 15  1  0  0  0  0
  7 16  1  0  0  0  0
  8 17  1  0  0  0  0
 10 18  1  0  0  0  0
M  END
$$$$
114
  Mrv2314 01052423262D          

 26 25  0  0  0  0            999 V2000
    0.8250   -1.4289    0.0000 C   0  0  0  0  0  0  0  0  0  0  0  0
    1.2375   -2.1434    0.0000 C   0  0  0  0  0  0  0  0  0  0  0  0
    2.0625   -2.1434    0.0000 C   0  0  0  0  0  0  0  0  0  0  0  0
    2.4750   -2.8579    0.0000 C   0  0  0  0  0  0  0  0  0  0  0  0
    3.3000   -2.8579    0.0000 C   0  0  0  0  0  0  0  0  0  0  0  0
    3.7125   -3.5724    0.0000 C   0  0  0  0  0  0  0  0  0  0  0  0
    4.5375   -3.5724    0.0000 C   0  0  0  0  0  0  0  0  0  0  0  0
    3.7125   -2.1434    0.0000 C   0  0  0  0  0  0  0  0  0  0  0  0
    3.3000   -1.4289    0.0000 O   0  0  0  0  0  0  0  0  0  0  0  0
    4.5375   -2.1434    0.0000 O   0  0  0  0  0  0  0  0  0  0  0  0
    1.5395   -1.0164    0.0000 H   0  0  0  0  0  0  0  0  0  0  0  0
    0.4125   -0.7145    0.0000 H   0  0  0  0  0  0  0  0  0  0  0  0
    0.1105   -1.8414    0.0000 H   0  0  0  0  0  0  0  0  0  0  0  0
    0.5482   -2.5968    0.0000 H   0  0  0  0  0  0  0  0  0  0  0  0
    1.1895   -2.9670    0.0000 H   0  0  0  0  0  0  0  0  0  0  0  0
    2.7518   -1.6901    0.0000 H   0  0  0  0  0  0  0  0  0  0  0  0
    2.1105   -1.3198    0.0000 H   0  0  0  0  0  0  0  0  0  0  0  0
    1.7857   -3.3112    0.0000 H   0  0  0  0  0  0  0  0  0  0  0  0
    2.4270   -3.6815    0.0000 H   0  0  0  0  0  0  0  0  0  0  0  0
    2.8875   -3.5724    0.0000 H   0  0  0  0  0  0  0  0  0  0  0  0
    3.4303   -4.3476    0.0000 H   0  0  0  0  0  0  0  0  0  0  0  0
    3.9947   -4.3476    0.0000 H   0  0  0  0  0  0  0  0  0  0  0  0
    5.0815   -4.1926    0.0000 H   0  0  0  0  0  0  0  0  0  0  0  0
    5.2693   -3.1914    0.0000 H   0  0  0  0  0  0  0  0  0  0  0  0
    4.3414   -2.7710    0.0000 H   0  0  0  0  0  0  0  0  0  0  0  0
    5.2022   -1.6547    0.0000 H   0  0  0  0  0  0  0  0  0  0  0  0
  1  2  1  0  0  0  0
  2  3  1  0  0  0  0
  3  4  1  0  0  0  0
  4  5  1  0  0  0  0
  5  6  1  0  0  0  0
  6  7  1  0  0  0  0
  5  8  1  0  0  0  0
  8  9  2  0  0  0  0
  8 10  1  0  0  0  0
  1 11  1  0  0  0  0
  1 12  1  0  0  0  0
  1 13  1  0  0  0  0
  2 14  1  0  0  0  0
  2 15  1  0  0  0  0
  3 16  1  0  0  0  0
  3 17  1  0  0  0  0
  4 18  1  0  0  0  0
  4 19  1  0  0  0  0
  5 20  1  0  0  0  0
  6 21  1  0  0  0  0
  6 22  1  0  0  0  0
  7 23  1  0  0  0  0
  7 24  1  0  0  0  0
  7 25  1  0  0  0  0
 10 26  1  0  0  0  0
M  END
$$$$
115
  Mrv2314 01052423262D          

 11 10  0  0  0  0            999 V2000
    0.8250    0.0000    0.0000 C   0  0  0  0  0  0  0  0  0  0  0  0
    1.2375    0.7145    0.0000 C   0  0  0  0  0  0  0  0  0  0  0  0
    1.6500    1.4289    0.0000 F   0  0  0  0  0  0  0  0  0  0  0  0
    0.5230    1.1270    0.0000 F   0  0  0  0  0  0  0  0  0  0  0  0
    1.9520    0.3020    0.0000 F   0  0  0  0  0  0  0  0  0  0  0  0
    1.2375   -0.7145    0.0000 C   0  0  0  0  0  0  0  0  0  0  0  0
    1.6500   -1.4289    0.0000 F   0  0  0  0  0  0  0  0  0  0  0  0
    0.5230   -1.1270    0.0000 F   0  0  0  0  0  0  0  0  0  0  0  0
    1.9520   -0.3020    0.0000 F   0  0  0  0  0  0  0  0  0  0  0  0
    0.0000    0.0000    0.0000 F   0  0  0  0  0  0  0  0  0  0  0  0
    1.6500   -0.0000    0.0000 H   0  0  0  0  0  0  0  0  0  0  0  0
  1  2  1  0  0  0  0
  2  3  1  0  0  0  0
  2  4  1  0  0  0  0
  2  5  1  0  0  0  0
  1  6  1  0  0  0  0
  6  7  1  0  0  0  0
  6  8  1  0  0  0  0
  6  9  1  0  0  0  0
  1 10  1  0  0  0  0
  1 11  1  0  0  0  0
M  END
$$$$
116
  Mrv2314 01052423262D          

 29 30  0  0  0  0            999 V2000
    1.4289    0.0000    0.0000 C   0  0  0  0  0  0  0  0  0  0  0  0
    2.1434   -0.4125    0.0000 O   0  0  0  0  0  0  0  0  0  0  0  0
    2.1434   -1.2375    0.0000 C   0  0  0  0  0  0  0  0  0  0  0  0
    2.8579   -1.6500    0.0000 C   0  0  0  0  0  0  0  0  0  0  0  0
    2.8579   -2.4750    0.0000 C   0  0  0  0  0  0  0  0  0  0  0  0
    2.1434   -2.8875    0.0000 C   0  0  0  0  0  0  0  0  0  0  0  0
    1.4289   -2.4750    0.0000 C   0  0  0  0  0  0  0  0  0  0  0  0
    1.4289   -1.6500    0.0000 C   0  0  0  0  0  0  0  0  0  0  0  0
    2.1434   -3.7125    0.0000 C   0  0  0  0  0  0  0  0  0  0  0  0
    2.8579   -4.1250    0.0000 O   0  0  0  0  0  0  0  0  0  0  0  0
    1.4289   -4.1250    0.0000 C   0  0  0  0  0  0  0  0  0  0  0  0
    1.4289   -4.9500    0.0000 C   0  0  0  0  0  0  0  0  0  0  0  0
    0.7145   -5.3625    0.0000 C   0  0  0  0  0  0  0  0  0  0  0  0
   -0.0000   -4.9500    0.0000 C   0  0  0  0  0  0  0  0  0  0  0  0
    0.0000   -4.1250    0.0000 C   0  0  0  0  0  0  0  0  0  0  0  0
    0.7145   -3.7125    0.0000 C   0  0  0  0  0  0  0  0  0  0  0  0
    3.5724   -2.8875    0.0000 O   0  0  0  0  0  0  0  0  0  0  0  0
    1.8414    0.7145    0.0000 H   0  0  0  0  0  0  0  0  0  0  0  0
    0.7145    0.4125    0.0000 H   0  0  0  0  0  0  0  0  0  0  0  0
    1.0164   -0.7145    0.0000 H   0  0  0  0  0  0  0  0  0  0  0  0
    3.5724   -1.2375    0.0000 H   0  0  0  0  0  0  0  0  0  0  0  0
    0.7145   -2.8875    0.0000 H   0  0  0  0  0  0  0  0  0  0  0  0
    0.7145   -1.2375    0.0000 H   0  0  0  0  0  0  0  0  0  0  0  0
    2.1434   -5.3625    0.0000 H   0  0  0  0  0  0  0  0  0  0  0  0
    0.7145   -6.1875    0.0000 H   0  0  0  0  0  0  0  0  0  0  0  0
   -0.7145   -5.3625    0.0000 H   0  0  0  0  0  0  0  0  0  0  0  0
   -0.7145   -3.7125    0.0000 H   0  0  0  0  0  0  0  0  0  0  0  0
    1.4289   -3.3000    0.0000 H   0  0  0  0  0  0  0  0  0  0  0  0
    3.5724   -3.7125    0.0000 H   0  0  0  0  0  0  0  0  0  0  0  0
  1  2  1  0  0  0  0
  2  3  1  0  0  0  0
  3  4  4  0  0  0  0
  4  5  4  0  0  0  0
  5  6  4  0  0  0  0
  6  7  4  0  0  0  0
  7  8  4  0  0  0  0
  3  8  4  0  0  0  0
  6  9  1  0  0  0  0
  9 10  2  0  0  0  0
  9 11  1  0  0  0  0
 11 12  4  0  0  0  0
 12 13  4  0  0  0  0
 13 14  4  0  0  0  0
 14 15  4  0  0  0  0
 15 16  4  0  0  0  0
 11 16  4  0  0  0  0
  5 17  1  0  0  0  0
  1 18  1  0  0  0  0
  1 19  1  0  0  0  0
  1 20  1  0  0  0  0
  4 21  1  0  0  0  0
  7 22  1  0  0  0  0
  8 23  1  0  0  0  0
 12 24  1  0  0  0  0
 13 25  1  0  0  0  0
 14 26  1  0  0  0  0
 15 27  1  0  0  0  0
 16 28  1  0  0  0  0
 17 29  1  0  0  0  0
M  END
$$$$
117
  Mrv2314 01052423262D          

 16 17  0  0  0  0            999 V2000
    3.3523    1.9354    0.0000 C   0  0  0  0  0  0  0  0  0  0  0  0
    3.3523    1.1104    0.0000 C   0  0  0  0  0  0  0  0  0  0  0  0
    2.6378    0.6979    0.0000 C   0  0  0  0  0  0  0  0  0  0  0  0
    1.9233    1.1104    0.0000 C   0  0  0  0  0  0  0  0  0  0  0  0
    1.9233    1.9354    0.0000 C   0  0  0  0  0  0  0  0  0  0  0  0
    2.6378    2.3479    0.0000 C   0  0  0  0  0  0  0  0  0  0  0  0
    1.1387    2.1904    0.0000 N   0  0  0  0  0  0  0  0  0  0  0  0
    0.6538    1.5229    0.0000 C   0  0  0  0  0  0  0  0  0  0  0  0
   -0.1712    1.5229    0.0000 S   0  0  0  0  0  0  0  0  0  0  0  0
    1.1387    0.8555    0.0000 N   0  0  0  0  0  0  0  0  0  0  0  0
    4.0668    2.3479    0.0000 H   0  0  0  0  0  0  0  0  0  0  0  0
    4.0668    0.6979    0.0000 H   0  0  0  0  0  0  0  0  0  0  0  0
    2.6378   -0.1271    0.0000 H   0  0  0  0  0  0  0  0  0  0  0  0
    2.6378    3.1729    0.0000 H   0  0  0  0  0  0  0  0  0  0  0  0
    0.8838    2.9750    0.0000 H   0  0  0  0  0  0  0  0  0  0  0  0
    0.8838    0.0709    0.0000 H   0  0  0  0  0  0  0  0  0  0  0  0
  1  2  4  0  0  0  0
  2  3  4  0  0  0  0
  3  4  4  0  0  0  0
  4  5  4  0  0  0  0
  5  6  4  0  0  0  0
  1  6  4  0  0  0  0
  5  7  1  0  0  0  0
  7  8  1  0  0  0  0
  8  9  2  0  0  0  0
  8 10  1  0  0  0  0
  4 10  1  0  0  0  0
  1 11  1  0  0  0  0
  2 12  1  0  0  0  0
  3 13  1  0  0  0  0
  6 14  1  0  0  0  0
  7 15  1  0  0  0  0
 10 16  1  0  0  0  0
M  END
$$$$
118
  Mrv2314 01052423262D          

 15 16  0  0  0  0            999 V2000
    3.3523    1.9354    0.0000 C   0  0  0  0  0  0  0  0  0  0  0  0
    3.3523    1.1104    0.0000 C   0  0  0  0  0  0  0  0  0  0  0  0
    2.6378    0.6979    0.0000 C   0  0  0  0  0  0  0  0  0  0  0  0
    1.9233    1.1104    0.0000 C   0  0  0  0  0  0  0  0  0  0  0  0
    1.9233    1.9354    0.0000 C   0  0  0  0  0  0  0  0  0  0  0  0
    2.6378    2.3479    0.0000 C   0  0  0  0  0  0  0  0  0  0  0  0
    1.1387    2.1904    0.0000 N   0  0  0  0  0  0  0  0  0  0  0  0
    0.6538    1.5229    0.0000 C   0  0  0  0  0  0  0  0  0  0  0  0
   -0.1712    1.5229    0.0000 S   0  0  0  0  0  0  0  0  0  0  0  0
    1.1387    0.8555    0.0000 S   0  0  0  0  0  0  0  0  0  0  0  0
    4.0668    2.3479    0.0000 H   0  0  0  0  0  0  0  0  0  0  0  0
    4.0668    0.6979    0.0000 H   0  0  0  0  0  0  0  0  0  0  0  0
    2.6378   -0.1271    0.0000 H   0  0  0  0  0  0  0  0  0  0  0  0
    2.6378    3.1729    0.0000 H   0  0  0  0  0  0  0  0  0  0  0  0
    0.8838    2.9750    0.0000 H   0  0  0  0  0  0  0  0  0  0  0  0
  1  2  4  0  0  0  0
  2  3  4  0  0  0  0
  3  4  4  0  0  0  0
  4  5  4  0  0  0  0
  5  6  4  0  0  0  0
  1  6  4  0  0  0  0
  5  7  1  0  0  0  0
  7  8  1  0  0  0  0
  8  9  2  0  0  0  0
  8 10  1  0  0  0  0
  4 10  1  0  0  0  0
  1 11  1  0  0  0  0
  2 12  1  0  0  0  0
  3 13  1  0  0  0  0
  6 14  1  0  0  0  0
  7 15  1  0  0  0  0
M  END
$$$$
119
  Mrv2314 01052423262D          

 26 26  0  0  0  0            999 V2000
    0.0000    3.3000    0.0000 C   0  0  0  0  0  0  0  0  0  0  0  0
    0.0000    2.4750    0.0000 C   0  0  0  0  0  0  0  0  0  0  0  0
    0.7145    2.0625    0.0000 C   0  0  0  0  0  0  0  0  0  0  0  0
    0.7145    1.2375    0.0000 C   0  0  0  0  0  0  0  0  0  0  0  0
    1.4289    0.8250    0.0000 C   0  0  0  0  0  0  0  0  0  0  0  0
    1.4289   -0.0000    0.0000 C   0  0  0  0  0  0  0  0  0  0  0  0
    0.7145   -0.4125    0.0000 C   0  0  0  0  0  0  0  0  0  0  0  0
    0.0000    0.0000    0.0000 C   0  0  0  0  0  0  0  0  0  0  0  0
    0.0000    0.8250    0.0000 C   0  0  0  0  0  0  0  0  0  0  0  0
    0.7145   -1.2375    0.0000 O   0  0  0  0  0  0  0  0  0  0  0  0
    2.1434   -0.4125    0.0000 O   0  0  0  0  0  0  0  0  0  0  0  0
    2.1434   -1.2375    0.0000 C   0  0  0  0  0  0  0  0  0  0  0  0
    0.8250    3.3000    0.0000 H   0  0  0  0  0  0  0  0  0  0  0  0
    0.0000    4.1250    0.0000 H   0  0  0  0  0  0  0  0  0  0  0  0
   -0.8250    3.3000    0.0000 H   0  0  0  0  0  0  0  0  0  0  0  0
   -0.8236    2.4270    0.0000 H   0  0  0  0  0  0  0  0  0  0  0  0
   -0.4533    1.7857    0.0000 H   0  0  0  0  0  0  0  0  0  0  0  0
    1.5381    2.1105    0.0000 H   0  0  0  0  0  0  0  0  0  0  0  0
    1.1678    2.7518    0.0000 H   0  0  0  0  0  0  0  0  0  0  0  0
    2.1434    1.2375    0.0000 H   0  0  0  0  0  0  0  0  0  0  0  0
   -0.7145   -0.4125    0.0000 H   0  0  0  0  0  0  0  0  0  0  0  0
   -0.7145    1.2375    0.0000 H   0  0  0  0  0  0  0  0  0  0  0  0
   -0.0000   -1.6500    0.0000 H   0  0  0  0  0  0  0  0  0  0  0  0
    1.3184   -1.2375    0.0000 H   0  0  0  0  0  0  0  0  0  0  0  0
    2.1434   -2.0625    0.0000 H   0  0  0  0  0  0  0  0  0  0  0  0
    2.9684   -1.2375    0.0000 H   0  0  0  0  0  0  0  0  0  0  0  0
  1  2  1  0  0  0  0
  2  3  1  0  0  0  0
  3  4  1  0  0  0  0
  4  5  4  0  0  0  0
  5  6  4  0  0  0  0
  6  7  4  0  0  0  0
  7  8  4  0  0  0  0
  8  9  4  0  0  0  0
  4  9  4  0  0  0  0
  7 10  1  0  0  0  0
  6 11  1  0  0  0  0
 11 12  1  0  0  0  0
  1 13  1  0  0  0  0
  1 14  1  0  0  0  0
  1 15  1  0  0  0  0
  2 16  1  0  0  0  0
  2 17  1  0  0  0  0
  3 18  1  0  0  0  0
  3 19  1  0  0  0  0
  5 20  1  0  0  0  0
  8 21  1  0  0  0  0
  9 22  1  0  0  0  0
 10 23  1  0  0  0  0
 12 24  1  0  0  0  0
 12 25  1  0  0  0  0
 12 26  1  0  0  0  0
M  END
$$$$
120
  Mrv2314 01052423262D          

 21 21  0  0  0  0            999 V2000
    0.7145    2.0625    0.0000 C   0  0  0  0  0  0  0  0  0  0  0  0
    0.7145    1.2375    0.0000 C   0  0  0  0  0  0  0  0  0  0  0  0
    1.4289    0.8250    0.0000 C   0  0  0  0  0  0  0  0  0  0  0  0
    1.4289   -0.0000    0.0000 C   0  0  0  0  0  0  0  0  0  0  0  0
    0.7145   -0.4125    0.0000 C   0  0  0  0  0  0  0  0  0  0  0  0
    0.0000    0.0000    0.0000 C   0  0  0  0  0  0  0  0  0  0  0  0
    0.0000    0.8250    0.0000 C   0  0  0  0  0  0  0  0  0  0  0  0
    0.7145   -1.2375    0.0000 O   0  0  0  0  0  0  0  0  0  0  0  0
    1.4289   -1.6500    0.0000 C   0  0  0  0  0  0  0  0  0  0  0  0
    2.1434   -0.4125    0.0000 N   0  0  0  0  0  0  0  0  0  0  0  0
    1.5395    2.0625    0.0000 H   0  0  0  0  0  0  0  0  0  0  0  0
    0.7145    2.8875    0.0000 H   0  0  0  0  0  0  0  0  0  0  0  0
   -0.1105    2.0625    0.0000 H   0  0  0  0  0  0  0  0  0  0  0  0
    2.1434    1.2375    0.0000 H   0  0  0  0  0  0  0  0  0  0  0  0
   -0.7145   -0.4125    0.0000 H   0  0  0  0  0  0  0  0  0  0  0  0
   -0.7145    1.2375    0.0000 H   0  0  0  0  0  0  0  0  0  0  0  0
    1.0164   -2.3645    0.0000 H   0  0  0  0  0  0  0  0  0  0  0  0
    2.1434   -2.0625    0.0000 H   0  0  0  0  0  0  0  0  0  0  0  0
    1.8414   -0.9355    0.0000 H   0  0  0  0  0  0  0  0  0  0  0  0
    2.9403   -0.6260    0.0000 H   0  0  0  0  0  0  0  0  0  0  0  0
    2.7268    0.1709    0.0000 H   0  0  0  0  0  0  0  0  0  0  0  0
  1  2  1  0  0  0  0
  2  3  4  0  0  0  0
  3  4  4  0  0  0  0
  4  5  4  0  0  0  0
  5  6  4  0  0  0  0
  6  7  4  0  0  0  0
  2  7  4  0  0  0  0
  5  8  1  0  0  0  0
  8  9  1  0  0  0  0
  4 10  1  0  0  0  0
  1 11  1  0  0  0  0
  1 12  1  0  0  0  0
  1 13  1  0  0  0  0
  3 14  1  0  0  0  0
  6 15  1  0  0  0  0
  7 16  1  0  0  0  0
  9 17  1  0  0  0  0
  9 18  1  0  0  0  0
  9 19  1  0  0  0  0
 10 20  1  0  0  0  0
 10 21  1  0  0  0  0
M  END
$$$$
121
  Mrv2314 01052423262D          

 17 17  0  0  0  0            999 V2000
    0.0000    2.4750    0.0000 C   0  0  0  0  0  0  0  0  0  0  0  0
    0.7145    2.0625    0.0000 O   0  0  0  0  0  0  0  0  0  0  0  0
    0.7145    1.2375    0.0000 C   0  0  0  0  0  0  0  0  0  0  0  0
    1.4289    0.8250    0.0000 C   0  0  0  0  0  0  0  0  0  0  0  0
    1.4289   -0.0000    0.0000 C   0  0  0  0  0  0  0  0  0  0  0  0
    0.7145   -0.4125    0.0000 C   0  0  0  0  0  0  0  0  0  0  0  0
    0.0000    0.0000    0.0000 C   0  0  0  0  0  0  0  0  0  0  0  0
    0.0000    0.8250    0.0000 C   0  0  0  0  0  0  0  0  0  0  0  0
   -0.7145    1.2375    0.0000 O   0  0  0  0  0  0  0  0  0  0  0  0
    0.4125    3.1895    0.0000 H   0  0  0  0  0  0  0  0  0  0  0  0
   -0.7145    2.8875    0.0000 H   0  0  0  0  0  0  0  0  0  0  0  0
   -0.4125    1.7605    0.0000 H   0  0  0  0  0  0  0  0  0  0  0  0
    2.1434    1.2375    0.0000 H   0  0  0  0  0  0  0  0  0  0  0  0
    2.1434   -0.4125    0.0000 H   0  0  0  0  0  0  0  0  0  0  0  0
    0.7145   -1.2375    0.0000 H   0  0  0  0  0  0  0  0  0  0  0  0
   -0.7145   -0.4125    0.0000 H   0  0  0  0  0  0  0  0  0  0  0  0
   -1.5114    1.0240    0.0000 H   0  0  0  0  0  0  0  0  0  0  0  0
  1  2  1  0  0  0  0
  2  3  1  0  0  0  0
  3  4  4  0  0  0  0
  4  5  4  0  0  0  0
  5  6  4  0  0  0  0
  6  7  4  0  0  0  0
  7  8  4  0  0  0  0
  3  8  4  0  0  0  0
  8  9  1  0  0  0  0
  1 10  1  0  0  0  0
  1 11  1  0  0  0  0
  1 12  1  0  0  0  0
  4 13  1  0  0  0  0
  5 14  1  0  0  0  0
  6 15  1  0  0  0  0
  7 16  1  0  0  0  0
  9 17  1  0  0  0  0
M  END
$$$$
122
  Mrv2314 01052423262D          

 17 17  0  0  0  0            999 V2000
    0.7145    2.0625    0.0000 C   0  0  0  0  0  0  0  0  0  0  0  0
    0.7145    1.2375    0.0000 C   0  0  0  0  0  0  0  0  0  0  0  0
    1.4289    0.8250    0.0000 C   0  0  0  0  0  0  0  0  0  0  0  0
    1.4289   -0.0000    0.0000 C   0  0  0  0  0  0  0  0  0  0  0  0
    0.7145   -0.4125    0.0000 C   0  0  0  0  0  0  0  0  0  0  0  0
    0.0000    0.0000    0.0000 C   0  0  0  0  0  0  0  0  0  0  0  0
    0.0000    0.8250    0.0000 C   0  0  0  0  0  0  0  0  0  0  0  0
   -0.7145    1.2375    0.0000 N   0  0  0  0  0  0  0  0  0  0  0  0
    1.5395    2.0625    0.0000 H   0  0  0  0  0  0  0  0  0  0  0  0
    0.7145    2.8875    0.0000 H   0  0  0  0  0  0  0  0  0  0  0  0
   -0.1105    2.0625    0.0000 H   0  0  0  0  0  0  0  0  0  0  0  0
    2.1434    1.2375    0.0000 H   0  0  0  0  0  0  0  0  0  0  0  0
    2.1434   -0.4125    0.0000 H   0  0  0  0  0  0  0  0  0  0  0  0
    0.7145   -1.2375    0.0000 H   0  0  0  0  0  0  0  0  0  0  0  0
   -0.7145   -0.4125    0.0000 H   0  0  0  0  0  0  0  0  0  0  0  0
   -0.7145    2.0625    0.0000 H   0  0  0  0  0  0  0  0  0  0  0  0
   -1.4289    0.8250    0.0000 H   0  0  0  0  0  0  0  0  0  0  0  0
  1  2  1  0  0  0  0
  2  3  4  0  0  0  0
  3  4  4  0  0  0  0
  4  5  4  0  0  0  0
  5  6  4  0  0  0  0
  6  7  4  0  0  0  0
  2  7  4  0  0  0  0
  7  8  1  0  0  0  0
  1  9  1  0  0  0  0
  1 10  1  0  0  0  0
  1 11  1  0  0  0  0
  3 12  1  0  0  0  0
  4 13  1  0  0  0  0
  5 14  1  0  0  0  0
  6 15  1  0  0  0  0
  8 16  1  0  0  0  0
  8 17  1  0  0  0  0
M  END
$$$$
123
  Mrv2314 01052423262D          

 20 21  0  0  0  0            999 V2000
    0.7145   -1.2375    0.0000 C   0  0  0  0  0  0  0  0  0  0  0  0
    0.7145   -0.4125    0.0000 C   0  0  0  0  0  0  0  0  0  0  0  0
    1.4289    0.0000    0.0000 C   0  0  0  0  0  0  0  0  0  0  0  0
    2.1434   -0.4125    0.0000 C   0  0  0  0  0  0  0  0  0  0  0  0
    2.8579    0.0000    0.0000 C   0  0  0  0  0  0  0  0  0  0  0  0
    3.5724   -0.4125    0.0000 C   0  0  0  0  0  0  0  0  0  0  0  0
    3.5724   -1.2375    0.0000 C   0  0  0  0  0  0  0  0  0  0  0  0
    2.8579   -1.6500    0.0000 C   0  0  0  0  0  0  0  0  0  0  0  0
    2.1434   -1.2375    0.0000 C   0  0  0  0  0  0  0  0  0  0  0  0
    1.4289   -1.6500    0.0000 C   0  0  0  0  0  0  0  0  0  0  0  0
    4.2868   -0.0000    0.0000 N   0  0  0  0  0  0  0  0  0  0  0  0
    0.0000   -1.6500    0.0000 H   0  0  0  0  0  0  0  0  0  0  0  0
    0.0000    0.0000    0.0000 H   0  0  0  0  0  0  0  0  0  0  0  0
    1.4289    0.8250    0.0000 H   0  0  0  0  0  0  0  0  0  0  0  0
    2.8579    0.8250    0.0000 H   0  0  0  0  0  0  0  0  0  0  0  0
    4.2868   -1.6500    0.0000 H   0  0  0  0  0  0  0  0  0  0  0  0
    2.8579   -2.4750    0.0000 H   0  0  0  0  0  0  0  0  0  0  0  0
    1.4289   -2.4750    0.0000 H   0  0  0  0  0  0  0  0  0  0  0  0
    5.0013   -0.4125    0.0000 H   0  0  0  0  0  0  0  0  0  0  0  0
    4.2868    0.8250    0.0000 H   0  0  0  0  0  0  0  0  0  0  0  0
  1  2  4  0  0  0  0
  2  3  4  0  0  0  0
  3  4  4  0  0  0  0
  4  5  4  0  0  0  0
  5  6  4  0  0  0  0
  6  7  4  0  0  0  0
  7  8  4  0  0  0  0
  8  9  4  0  0  0  0
  4  9  4  0  0  0  0
  9 10  4  0  0  0  0
  1 10  4  0  0  0  0
  6 11  1  0  0  0  0
  1 12  1  0  0  0  0
  2 13  1  0  0  0  0
  3 14  1  0  0  0  0
  5 15  1  0  0  0  0
  7 16  1  0  0  0  0
  8 17  1  0  0  0  0
 10 18  1  0  0  0  0
 11 19  1  0  0  0  0
 11 20  1  0  0  0  0
M  END
$$$$
124
  Mrv2314 01052423262D          

 25 27  0  0  0  0            999 V2000
    1.9339   -0.6855    0.0000 C   0  0  0  0  0  0  0  0  0  0  0  0
    2.6014   -0.2006    0.0000 C   0  0  0  0  0  0  0  0  0  0  0  0
    3.4084   -0.3721    0.0000 C   0  0  0  0  0  0  0  0  0  0  0  0
    3.9604    0.2410    0.0000 C   0  0  0  0  0  0  0  0  0  0  0  0
    3.7054    1.0256    0.0000 C   0  0  0  0  0  0  0  0  0  0  0  0
    2.8985    1.1971    0.0000 C   0  0  0  0  0  0  0  0  0  0  0  0
    2.3464    0.5840    0.0000 C   0  0  0  0  0  0  0  0  0  0  0  0
    1.5214    0.5840    0.0000 C   0  0  0  0  0  0  0  0  0  0  0  0
    1.2665   -0.2006    0.0000 C   0  0  0  0  0  0  0  0  0  0  0  0
    0.4595   -0.3721    0.0000 C   0  0  0  0  0  0  0  0  0  0  0  0
   -0.0925    0.2410    0.0000 C   0  0  0  0  0  0  0  0  0  0  0  0
    0.1624    1.0256    0.0000 C   0  0  0  0  0  0  0  0  0  0  0  0
    0.9694    1.1971    0.0000 C   0  0  0  0  0  0  0  0  0  0  0  0
   -0.8995    0.0694    0.0000 N   0  3  0  0  0  0  0  0  0  0  0  0
   -1.1544   -0.7152    0.0000 O   0  0  0  0  0  0  0  0  0  0  0  0
   -1.4515    0.6825    0.0000 O   0  5  0  0  0  0  0  0  0  0  0  0
    1.5466   -1.4139    0.0000 H   0  0  0  0  0  0  0  0  0  0  0  0
    2.3213   -1.4139    0.0000 H   0  0  0  0  0  0  0  0  0  0  0  0
    3.6633   -1.1567    0.0000 H   0  0  0  0  0  0  0  0  0  0  0  0
    4.7674    0.0694    0.0000 H   0  0  0  0  0  0  0  0  0  0  0  0
    4.2575    1.6387    0.0000 H   0  0  0  0  0  0  0  0  0  0  0  0
    2.6435    1.9817    0.0000 H   0  0  0  0  0  0  0  0  0  0  0  0
    0.2046   -1.1567    0.0000 H   0  0  0  0  0  0  0  0  0  0  0  0
   -0.3896    1.6387    0.0000 H   0  0  0  0  0  0  0  0  0  0  0  0
    1.2243    1.9817    0.0000 H   0  0  0  0  0  0  0  0  0  0  0  0
  1  2  1  0  0  0  0
  2  3  4  0  0  0  0
  3  4  4  0  0  0  0
  4  5  4  0  0  0  0
  5  6  4  0  0  0  0
  6  7  4  0  0  0  0
  2  7  4  0  0  0  0
  7  8  1  0  0  0  0
  8  9  4  0  0  0  0
  1  9  1  0  0  0  0
  9 10  4  0  0  0  0
 10 11  4  0  0  0  0
 11 12  4  0  0  0  0
 12 13  4  0  0  0  0
  8 13  4  0  0  0  0
 11 14  1  0  0  0  0
 14 15  2  0  0  0  0
 14 16  1  0  0  0  0
  1 17  1  0  0  0  0
  1 18  1  0  0  0  0
  3 19  1  0  0  0  0
  4 20  1  0  0  0  0
  5 21  1  0  0  0  0
  6 22  1  0  0  0  0
 10 23  1  0  0  0  0
 12 24  1  0  0  0  0
 13 25  1  0  0  0  0
M  CHG  2  14   1  16  -1
M  END
$$$$
125
  Mrv2314 01052423262D          

 20 20  0  0  0  0            999 V2000
    0.7145    1.2375    0.0000 C   0  0  0  0  0  0  0  0  0  0  0  0
    1.4289    0.8250    0.0000 C   0  0  0  0  0  0  0  0  0  0  0  0
    1.4289   -0.0000    0.0000 C   0  0  0  0  0  0  0  0  0  0  0  0
    0.7145   -0.4125    0.0000 C   0  0  0  0  0  0  0  0  0  0  0  0
    0.0000    0.0000    0.0000 C   0  0  0  0  0  0  0  0  0  0  0  0
    0.0000    0.8250    0.0000 C   0  0  0  0  0  0  0  0  0  0  0  0
    0.7145   -1.2375    0.0000 O   0  0  0  0  0  0  0  0  0  0  0  0
    1.4289   -1.6500    0.0000 C   0  0  0  0  0  0  0  0  0  0  0  0
    1.4289   -2.4750    0.0000 C   0  0  0  0  0  0  0  0  0  0  0  0
    2.1434   -2.8875    0.0000 O   0  0  0  0  0  0  0  0  0  0  0  0
    0.7145    2.0625    0.0000 H   0  0  0  0  0  0  0  0  0  0  0  0
    2.1434    1.2375    0.0000 H   0  0  0  0  0  0  0  0  0  0  0  0
    2.1434   -0.4125    0.0000 H   0  0  0  0  0  0  0  0  0  0  0  0
   -0.7145   -0.4125    0.0000 H   0  0  0  0  0  0  0  0  0  0  0  0
   -0.7145    1.2375    0.0000 H   0  0  0  0  0  0  0  0  0  0  0  0
    2.2525   -1.6020    0.0000 H   0  0  0  0  0  0  0  0  0  0  0  0
    1.8823   -0.9607    0.0000 H   0  0  0  0  0  0  0  0  0  0  0  0
    0.6053   -2.5230    0.0000 H   0  0  0  0  0  0  0  0  0  0  0  0
    0.9756   -3.1643    0.0000 H   0  0  0  0  0  0  0  0  0  0  0  0
    2.1434   -3.7125    0.0000 H   0  0  0  0  0  0  0  0  0  0  0  0
  1  2  4  0  0  0  0
  2  3  4  0  0  0  0
  3  4  4  0  0  0  0
  4  5  4  0  0  0  0
  5  6  4  0  0  0  0
  1  6  4  0  0  0  0
  4  7  1  0  0  0  0
  7  8  1  0  0  0  0
  8  9  1  0  0  0  0
  9 10  1  0  0  0  0
  1 11  1  0  0  0  0
  2 12  1  0  0  0  0
  3 13  1  0  0  0  0
  5 14  1  0  0  0  0
  6 15  1  0  0  0  0
  8 16  1  0  0  0  0
  8 17  1  0  0  0  0
  9 18  1  0  0  0  0
  9 19  1  0  0  0  0
 10 20  1  0  0  0  0
M  END
$$$$
126
  Mrv2314 01052423262D          

 23 24  0  0  0  0            999 V2000
    0.7145   -1.2375    0.0000 C   0  0  0  0  0  0  0  0  0  0  0  0
    1.4289   -1.6500    0.0000 C   0  0  0  0  0  0  0  0  0  0  0  0
    1.4289   -2.4750    0.0000 C   0  0  0  0  0  0  0  0  0  0  0  0
    0.7145   -2.8875    0.0000 C   0  0  0  0  0  0  0  0  0  0  0  0
    0.0000   -2.4750    0.0000 C   0  0  0  0  0  0  0  0  0  0  0  0
    0.0000   -1.6500    0.0000 C   0  0  0  0  0  0  0  0  0  0  0  0
    0.7145   -3.7125    0.0000 C   0  0  0  0  0  0  0  0  0  0  0  0
    1.4289   -4.1250    0.0000 C   0  0  0  0  0  0  0  0  0  0  0  0
    1.4289   -4.9500    0.0000 C   0  0  0  0  0  0  0  0  0  0  0  0
    0.7145   -5.3625    0.0000 C   0  0  0  0  0  0  0  0  0  0  0  0
    0.0000   -4.9500    0.0000 C   0  0  0  0  0  0  0  0  0  0  0  0
    0.0000   -4.1250    0.0000 C   0  0  0  0  0  0  0  0  0  0  0  0
   -0.7145   -3.7125    0.0000 O   0  0  0  0  0  0  0  0  0  0  0  0
    0.7145   -0.4125    0.0000 H   0  0  0  0  0  0  0  0  0  0  0  0
    2.1434   -1.2375    0.0000 H   0  0  0  0  0  0  0  0  0  0  0  0
    2.1434   -2.8875    0.0000 H   0  0  0  0  0  0  0  0  0  0  0  0
   -0.7145   -2.8875    0.0000 H   0  0  0  0  0  0  0  0  0  0  0  0
   -0.7145   -1.2375    0.0000 H   0  0  0  0  0  0  0  0  0  0  0  0
    2.1434   -3.7125    0.0000 H   0  0  0  0  0  0  0  0  0  0  0  0
    2.1434   -5.3625    0.0000 H   0  0  0  0  0  0  0  0  0  0  0  0
    0.7145   -6.1875    0.0000 H   0  0  0  0  0  0  0  0  0  0  0  0
   -0.7145   -5.3625    0.0000 H   0  0  0  0  0  0  0  0  0  0  0  0
   -1.4289   -4.1250    0.0000 H   0  0  0  0  0  0  0  0  0  0  0  0
  1  2  4  0  0  0  0
  2  3  4  0  0  0  0
  3  4  4  0  0  0  0
  4  5  4  0  0  0  0
  5  6  4  0  0  0  0
  1  6  4  0  0  0  0
  4  7  1  0  0  0  0
  7  8  4  0  0  0  0
  8  9  4  0  0  0  0
  9 10  4  0  0  0  0
 10 11  4  0  0  0  0
 11 12  4  0  0  0  0
  7 12  4  0  0  0  0
 12 13  1  0  0  0  0
  1 14  1  0  0  0  0
  2 15  1  0  0  0  0
  3 16  1  0  0  0  0
  5 17  1  0  0  0  0
  6 18  1  0  0  0  0
  8 19  1  0  0  0  0
  9 20  1  0  0  0  0
 10 21  1  0  0  0  0
 11 22  1  0  0  0  0
 13 23  1  0  0  0  0
M  END
$$$$
127
  Mrv2314 01052423262D          

 31 31  0  0  0  0            999 V2000
    0.0000    2.4750    0.0000 C   0  0  0  0  0  0  0  0  0  0  0  0
    0.7145    2.0625    0.0000 C   0  0  0  0  0  0  0  0  0  0  0  0
    0.7145    1.2375    0.0000 C   0  0  0  0  0  0  0  0  0  0  0  0
    1.4289    0.8250    0.0000 C   0  0  0  0  0  0  0  0  0  0  0  0
    1.4289   -0.0000    0.0000 C   0  0  0  0  0  0  0  0  0  0  0  0
    0.7145   -0.4125    0.0000 C   0  0  0  0  0  0  0  0  0  0  0  0
    0.0000    0.0000    0.0000 C   0  0  0  0  0  0  0  0  0  0  0  0
    0.0000    0.8250    0.0000 C   0  0  0  0  0  0  0  0  0  0  0  0
    0.7145   -1.2375    0.0000 O   0  0  0  0  0  0  0  0  0  0  0  0
    2.1434   -0.4125    0.0000 C   0  0  0  0  0  0  0  0  0  0  0  0
    2.8579   -0.8250    0.0000 C   0  0  0  0  0  0  0  0  0  0  0  0
    1.7309   -1.1270    0.0000 C   0  0  0  0  0  0  0  0  0  0  0  0
    2.5559    0.3020    0.0000 C   0  0  0  0  0  0  0  0  0  0  0  0
    0.4125    3.1895    0.0000 H   0  0  0  0  0  0  0  0  0  0  0  0
   -0.7145    2.8875    0.0000 H   0  0  0  0  0  0  0  0  0  0  0  0
   -0.4125    1.7605    0.0000 H   0  0  0  0  0  0  0  0  0  0  0  0
    1.5381    2.1105    0.0000 H   0  0  0  0  0  0  0  0  0  0  0  0
    1.1678    2.7518    0.0000 H   0  0  0  0  0  0  0  0  0  0  0  0
    2.1434    1.2375    0.0000 H   0  0  0  0  0  0  0  0  0  0  0  0
   -0.7145   -0.4125    0.0000 H   0  0  0  0  0  0  0  0  0  0  0  0
   -0.7145    1.2375    0.0000 H   0  0  0  0  0  0  0  0  0  0  0  0
   -0.0000   -1.6500    0.0000 H   0  0  0  0  0  0  0  0  0  0  0  0
    2.4454   -1.5395    0.0000 H   0  0  0  0  0  0  0  0  0  0  0  0
    3.5724   -1.2375    0.0000 H   0  0  0  0  0  0  0  0  0  0  0  0
    3.2704   -0.1105    0.0000 H   0  0  0  0  0  0  0  0  0  0  0  0
    1.2287   -0.4725    0.0000 H   0  0  0  0  0  0  0  0  0  0  0  0
    0.9340   -1.3405    0.0000 H   0  0  0  0  0  0  0  0  0  0  0  0
    1.6232   -1.9449    0.0000 H   0  0  0  0  0  0  0  0  0  0  0  0
    3.2104    0.8042    0.0000 H   0  0  0  0  0  0  0  0  0  0  0  0
    2.3424    1.0989    0.0000 H   0  0  0  0  0  0  0  0  0  0  0  0
    1.7380    0.4097    0.0000 H   0  0  0  0  0  0  0  0  0  0  0  0
  1  2  1  0  0  0  0
  2  3  1  0  0  0  0
  3  4  4  0  0  0  0
  4  5  4  0  0  0  0
  5  6  4  0  0  0  0
  6  7  4  0  0  0  0
  7  8  4  0  0  0  0
  3  8  4  0  0  0  0
  6  9  1  0  0  0  0
  5 10  1  0  0  0  0
 10 11  1  0  0  0  0
 10 12  1  0  0  0  0
 10 13  1  0  0  0  0
  1 14  1  0  0  0  0
  1 15  1  0  0  0  0
  1 16  1  0  0  0  0
  2 17  1  0  0  0  0
  2 18  1  0  0  0  0
  4 19  1  0  0  0  0
  7 20  1  0  0  0  0
  8 21  1  0  0  0  0
  9 22  1  0  0  0  0
 11 23  1  0  0  0  0
 11 24  1  0  0  0  0
 11 25  1  0  0  0  0
 12 26  1  0  0  0  0
 12 27  1  0  0  0  0
 12 28  1  0  0  0  0
 13 29  1  0  0  0  0
 13 30  1  0  0  0  0
 13 31  1  0  0  0  0
M  END
$$$$
128
  Mrv2314 01052423262D          

 29 29  0  0  0  0            999 V2000
    0.7145    2.8875    0.0000 C   0  0  0  0  0  0  0  0  0  0  0  0
    0.7145    2.0625    0.0000 C   0  0  0  0  0  0  0  0  0  0  0  0
   -0.1105    2.0625    0.0000 C   0  0  0  0  0  0  0  0  0  0  0  0
    1.5395    2.0625    0.0000 C   0  0  0  0  0  0  0  0  0  0  0  0
    0.7145    1.2375    0.0000 C   0  0  0  0  0  0  0  0  0  0  0  0
    1.4289    0.8250    0.0000 C   0  0  0  0  0  0  0  0  0  0  0  0
    1.4289   -0.0000    0.0000 C   0  0  0  0  0  0  0  0  0  0  0  0
    0.7145   -0.4125    0.0000 C   0  0  0  0  0  0  0  0  0  0  0  0
    0.0000    0.0000    0.0000 C   0  0  0  0  0  0  0  0  0  0  0  0
    0.0000    0.8250    0.0000 C   0  0  0  0  0  0  0  0  0  0  0  0
   -0.7145   -0.4125    0.0000 O   0  0  0  0  0  0  0  0  0  0  0  0
   -0.7145   -1.2375    0.0000 C   0  0  0  0  0  0  0  0  0  0  0  0
    2.1434    1.2375    0.0000 O   0  0  0  0  0  0  0  0  0  0  0  0
    1.5395    2.8875    0.0000 H   0  0  0  0  0  0  0  0  0  0  0  0
    0.7145    3.7125    0.0000 H   0  0  0  0  0  0  0  0  0  0  0  0
   -0.1105    2.8875    0.0000 H   0  0  0  0  0  0  0  0  0  0  0  0
   -0.8727    2.3782    0.0000 H   0  0  0  0  0  0  0  0  0  0  0  0
   -0.6939    1.4791    0.0000 H   0  0  0  0  0  0  0  0  0  0  0  0
    0.2052    1.3003    0.0000 H   0  0  0  0  0  0  0  0  0  0  0  0
    1.2238    1.3003    0.0000 H   0  0  0  0  0  0  0  0  0  0  0  0
    2.1228    1.4791    0.0000 H   0  0  0  0  0  0  0  0  0  0  0  0
    2.3017    2.3782    0.0000 H   0  0  0  0  0  0  0  0  0  0  0  0
    2.1434   -0.4125    0.0000 H   0  0  0  0  0  0  0  0  0  0  0  0
    0.7145   -1.2375    0.0000 H   0  0  0  0  0  0  0  0  0  0  0  0
   -0.7575    0.4981    0.0000 H   0  0  0  0  0  0  0  0  0  0  0  0
   -1.5395   -1.2375    0.0000 H   0  0  0  0  0  0  0  0  0  0  0  0
   -0.7145   -2.0625    0.0000 H   0  0  0  0  0  0  0  0  0  0  0  0
    0.1105   -1.2375    0.0000 H   0  0  0  0  0  0  0  0  0  0  0  0
    2.8748    0.8557    0.0000 H   0  0  0  0  0  0  0  0  0  0  0  0
  1  2  1  0  0  0  0
  2  3  1  0  0  0  0
  2  4  1  0  0  0  0
  2  5  1  0  0  0  0
  5  6  4  0  0  0  0
  6  7  4  0  0  0  0
  7  8  4  0  0  0  0
  8  9  4  0  0  0  0
  9 10  4  0  0  0  0
  5 10  4  0  0  0  0
  9 11  1  0  0  0  0
 11 12  1  0  0  0  0
  6 13  1  0  0  0  0
  1 14  1  0  0  0  0
  1 15  1  0  0  0  0
  1 16  1  0  0  0  0
  3 17  1  0  0  0  0
  3 18  1  0  0  0  0
  3 19  1  0  0  0  0
  4 20  1  0  0  0  0
  4 21  1  0  0  0  0
  4 22  1  0  0  0  0
  7 23  1  0  0  0  0
  8 24  1  0  0  0  0
 10 25  1  0  0  0  0
 12 26  1  0  0  0  0
 12 27  1  0  0  0  0
 12 28  1  0  0  0  0
 13 29  1  0  0  0  0
M  END
$$$$
129
  Mrv2314 01052423262D          

 28 28  0  0  0  0            999 V2000
    0.7145    2.0625    0.0000 C   0  0  0  0  0  0  0  0  0  0  0  0
    0.7145    1.2375    0.0000 C   0  0  0  0  0  0  0  0  0  0  0  0
    1.4289    0.8250    0.0000 C   0  0  0  0  0  0  0  0  0  0  0  0
    1.4289   -0.0000    0.0000 C   0  0  0  0  0  0  0  0  0  0  0  0
    0.7145   -0.4125    0.0000 C   0  0  0  0  0  0  0  0  0  0  0  0
    0.0000    0.0000    0.0000 C   0  0  0  0  0  0  0  0  0  0  0  0
    0.0000    0.8250    0.0000 C   0  0  0  0  0  0  0  0  0  0  0  0
    0.7145   -1.2375    0.0000 C   0  0  0  0  0  0  0  0  0  0  0  0
    0.7145   -2.0625    0.0000 C   0  0  0  0  0  0  0  0  0  0  0  0
   -0.1105   -1.2375    0.0000 C   0  0  0  0  0  0  0  0  0  0  0  0
    1.5395   -1.2375    0.0000 C   0  0  0  0  0  0  0  0  0  0  0  0
    2.1434   -0.4125    0.0000 O   0  0  0  0  0  0  0  0  0  0  0  0
    1.5395    2.0625    0.0000 H   0  0  0  0  0  0  0  0  0  0  0  0
    0.7145    2.8875    0.0000 H   0  0  0  0  0  0  0  0  0  0  0  0
   -0.1105    2.0625    0.0000 H   0  0  0  0  0  0  0  0  0  0  0  0
    2.1434    1.2375    0.0000 H   0  0  0  0  0  0  0  0  0  0  0  0
   -0.7145   -0.4125    0.0000 H   0  0  0  0  0  0  0  0  0  0  0  0
   -0.7145    1.2375    0.0000 H   0  0  0  0  0  0  0  0  0  0  0  0
   -0.1105   -2.0625    0.0000 H   0  0  0  0  0  0  0  0  0  0  0  0
    0.7145   -2.8875    0.0000 H   0  0  0  0  0  0  0  0  0  0  0  0
    1.5395   -2.0625    0.0000 H   0  0  0  0  0  0  0  0  0  0  0  0
    0.2052   -0.4753    0.0000 H   0  0  0  0  0  0  0  0  0  0  0  0
   -0.6939   -0.6541    0.0000 H   0  0  0  0  0  0  0  0  0  0  0  0
   -0.8727   -1.5532    0.0000 H   0  0  0  0  0  0  0  0  0  0  0  0
    2.3017   -1.5532    0.0000 H   0  0  0  0  0  0  0  0  0  0  0  0
    2.1228   -0.6541    0.0000 H   0  0  0  0  0  0  0  0  0  0  0  0
    1.2238   -0.4753    0.0000 H   0  0  0  0  0  0  0  0  0  0  0  0
    2.8748   -0.0307    0.0000 H   0  0  0  0  0  0  0  0  0  0  0  0
  1  2  1  0  0  0  0
  2  3  4  0  0  0  0
  3  4  4  0  0  0  0
  4  5  4  0  0  0  0
  5  6  4  0  0  0  0
  6  7  4  0  0  0  0
  2  7  4  0  0  0  0
  5  8  1  0  0  0  0
  8  9  1  0  0  0  0
  8 10  1  0  0  0  0
  8 11  1  0  0  0  0
  4 12  1  0  0  0  0
  1 13  1  0  0  0  0
  1 14  1  0  0  0  0
  1 15  1  0  0  0  0
  3 16  1  0  0  0  0
  6 17  1  0  0  0  0
  7 18  1  0  0  0  0
  9 19  1  0  0  0  0
  9 20  1  0  0  0  0
  9 21  1  0  0  0  0
 10 22  1  0  0  0  0
 10 23  1  0  0  0  0
 10 24  1  0  0  0  0
 11 25  1  0  0  0  0
 11 26  1  0  0  0  0
 11 27  1  0  0  0  0
 12 28  1  0  0  0  0
M  END
$$$$
130
  Mrv2314 01052423262D          

 25 25  0  0  0  0            999 V2000
    0.7145    2.8875    0.0000 C   0  0  0  0  0  0  0  0  0  0  0  0
    0.7145    2.0625    0.0000 C   0  0  0  0  0  0  0  0  0  0  0  0
   -0.1105    2.0625    0.0000 C   0  0  0  0  0  0  0  0  0  0  0  0
    1.5395    2.0625    0.0000 C   0  0  0  0  0  0  0  0  0  0  0  0
    0.7145    1.2375    0.0000 C   0  0  0  0  0  0  0  0  0  0  0  0
    1.4289    0.8250    0.0000 C   0  0  0  0  0  0  0  0  0  0  0  0
    1.4289   -0.0000    0.0000 C   0  0  0  0  0  0  0  0  0  0  0  0
    0.7145   -0.4125    0.0000 C   0  0  0  0  0  0  0  0  0  0  0  0
    0.0000    0.0000    0.0000 C   0  0  0  0  0  0  0  0  0  0  0  0
    0.0000    0.8250    0.0000 C   0  0  0  0  0  0  0  0  0  0  0  0
   -0.7145    1.2375    0.0000 O   0  0  0  0  0  0  0  0  0  0  0  0
    1.5395    2.8875    0.0000 H   0  0  0  0  0  0  0  0  0  0  0  0
    0.7145    3.7125    0.0000 H   0  0  0  0  0  0  0  0  0  0  0  0
   -0.1105    2.8875    0.0000 H   0  0  0  0  0  0  0  0  0  0  0  0
   -0.8727    2.3782    0.0000 H   0  0  0  0  0  0  0  0  0  0  0  0
   -0.6939    1.4791    0.0000 H   0  0  0  0  0  0  0  0  0  0  0  0
    0.2052    1.3003    0.0000 H   0  0  0  0  0  0  0  0  0  0  0  0
    1.2238    1.3003    0.0000 H   0  0  0  0  0  0  0  0  0  0  0  0
    2.1228    1.4791    0.0000 H   0  0  0  0  0  0  0  0  0  0  0  0
    2.3017    2.3782    0.0000 H   0  0  0  0  0  0  0  0  0  0  0  0
    2.1864    0.4981    0.0000 H   0  0  0  0  0  0  0  0  0  0  0  0
    1.8620   -0.7022    0.0000 H   0  0  0  0  0  0  0  0  0  0  0  0
    0.7145   -1.2375    0.0000 H   0  0  0  0  0  0  0  0  0  0  0  0
   -0.7145   -0.4125    0.0000 H   0  0  0  0  0  0  0  0  0  0  0  0
   -1.4458    0.8557    0.0000 H   0  0  0  0  0  0  0  0  0  0  0  0
  1  2  1  0  0  0  0
  2  3  1  0  0  0  0
  2  4  1  0  0  0  0
  2  5  1  0  0  0  0
  5  6  4  0  0  0  0
  6  7  4  0  0  0  0
  7  8  4  0  0  0  0
  8  9  4  0  0  0  0
  9 10  4  0  0  0  0
  5 10  4  0  0  0  0
 10 11  1  0  0  0  0
  1 12  1  0  0  0  0
  1 13  1  0  0  0  0
  1 14  1  0  0  0  0
  3 15  1  0  0  0  0
  3 16  1  0  0  0  0
  3 17  1  0  0  0  0
  4 18  1  0  0  0  0
  4 19  1  0  0  0  0
  4 20  1  0  0  0  0
  6 21  1  0  0  0  0
  7 22  1  0  0  0  0
  8 23  1  0  0  0  0
  9 24  1  0  0  0  0
 11 25  1  0  0  0  0
M  END
$$$$
131
  Mrv2314 01052423262D          

 34 35  0  0  0  0            999 V2000
   -1.8653    0.4014    0.0000 C   0  0  0  0  0  0  0  0  0  0  0  0
   -1.6937   -0.4056    0.0000 C   0  0  0  0  0  0  0  0  0  0  0  0
   -2.3068   -0.9576    0.0000 C   0  0  0  0  0  0  0  0  0  0  0  0
   -0.9091   -0.6605    0.0000 N   0  0  0  0  0  0  0  0  0  0  0  0
   -0.7376   -1.4675    0.0000 C   0  0  0  0  0  0  0  0  0  0  0  0
   -1.3507   -2.0195    0.0000 O   0  0  0  0  0  0  0  0  0  0  0  0
    0.0470   -1.7224    0.0000 N   0  0  0  0  0  0  0  0  0  0  0  0
    0.7145   -1.2375    0.0000 C   0  0  0  0  0  0  0  0  0  0  0  0
    1.3819   -1.7224    0.0000 C   0  0  0  0  0  0  0  0  0  0  0  0
    2.1665   -1.4675    0.0000 O   0  0  0  0  0  0  0  0  0  0  0  0
    1.1270   -2.5070    0.0000 N   0  0  0  0  0  0  0  0  0  0  0  0
    0.3020   -2.5070    0.0000 C   0  0  0  0  0  0  0  0  0  0  0  0
   -0.1830   -3.1745    0.0000 O   0  0  0  0  0  0  0  0  0  0  0  0
    1.6119   -3.1745    0.0000 C   0  0  0  0  0  0  0  0  0  0  0  0
    2.4324   -3.0882    0.0000 C   0  0  0  0  0  0  0  0  0  0  0  0
    2.9173   -3.7557    0.0000 C   0  0  0  0  0  0  0  0  0  0  0  0
    2.5817   -4.5094    0.0000 C   0  0  0  0  0  0  0  0  0  0  0  0
    1.7613   -4.5956    0.0000 C   0  0  0  0  0  0  0  0  0  0  0  0
    1.2763   -3.9282    0.0000 C   0  0  0  0  0  0  0  0  0  0  0  0
    1.4257   -5.3493    0.0000 Cl  0  0  0  0  0  0  0  0  0  0  0  0
    3.7378   -3.6695    0.0000 Cl  0  0  0  0  0  0  0  0  0  0  0  0
   -1.0583    0.5729    0.0000 H   0  0  0  0  0  0  0  0  0  0  0  0
   -2.0368    1.2084    0.0000 H   0  0  0  0  0  0  0  0  0  0  0  0
   -2.6722    0.2299    0.0000 H   0  0  0  0  0  0  0  0  0  0  0  0
   -2.4784   -0.1506    0.0000 H   0  0  0  0  0  0  0  0  0  0  0  0
   -3.1307   -0.9144    0.0000 H   0  0  0  0  0  0  0  0  0  0  0  0
   -2.5618   -1.7422    0.0000 H   0  0  0  0  0  0  0  0  0  0  0  0
   -1.6149   -1.4069    0.0000 H   0  0  0  0  0  0  0  0  0  0  0  0
   -0.2960   -0.1085    0.0000 H   0  0  0  0  0  0  0  0  0  0  0  0
    1.1018   -0.5091    0.0000 H   0  0  0  0  0  0  0  0  0  0  0  0
    0.3272   -0.5091    0.0000 H   0  0  0  0  0  0  0  0  0  0  0  0
    2.7679   -2.3346    0.0000 H   0  0  0  0  0  0  0  0  0  0  0  0
    3.0667   -5.1768    0.0000 H   0  0  0  0  0  0  0  0  0  0  0  0
    0.4559   -4.0144    0.0000 H   0  0  0  0  0  0  0  0  0  0  0  0
  1  2  1  0  0  0  0
  2  3  1  0  0  0  0
  2  4  1  0  0  0  0
  4  5  1  0  0  0  0
  5  6  2  0  0  0  0
  5  7  1  0  0  0  0
  7  8  1  0  0  0  0
  8  9  1  0  0  0  0
  9 10  2  0  0  0  0
  9 11  1  0  0  0  0
 11 12  1  0  0  0  0
  7 12  1  0  0  0  0
 12 13  2  0  0  0  0
 11 14  1  0  0  0  0
 14 15  4  0  0  0  0
 15 16  4  0  0  0  0
 16 17  4  0  0  0  0
 17 18  4  0  0  0  0
 18 19  4  0  0  0  0
 14 19  4  0  0  0  0
 18 20  1  0  0  0  0
 16 21  1  0  0  0  0
  1 22  1  0  0  0  0
  1 23  1  0  0  0  0
  1 24  1  0  0  0  0
  2 25  1  0  0  0  0
  3 26  1  0  0  0  0
  3 27  1  0  0  0  0
  3 28  1  0  0  0  0
  4 29  1  0  0  0  0
  8 30  1  0  0  0  0
  8 31  1  0  0  0  0
 15 32  1  0  0  0  0
 17 33  1  0  0  0  0
 19 34  1  0  0  0  0
M  END
$$$$
132
  Mrv2314 01052423262D          

 22 23  0  0  0  0            999 V2000
    0.7145   -1.2375    0.0000 C   0  0  0  0  0  0  0  0  0  0  0  0
    1.4289   -1.6500    0.0000 C   0  0  0  0  0  0  0  0  0  0  0  0
    1.4289   -2.4750    0.0000 C   0  0  0  0  0  0  0  0  0  0  0  0
    0.7145   -2.8875    0.0000 C   0  0  0  0  0  0  0  0  0  0  0  0
    0.0000   -2.4750    0.0000 C   0  0  0  0  0  0  0  0  0  0  0  0
    0.0000   -1.6500    0.0000 C   0  0  0  0  0  0  0  0  0  0  0  0
   -0.7145   -1.2375    0.0000 C   0  0  0  0  0  0  0  0  0  0  0  0
   -1.4289   -1.6500    0.0000 C   0  0  0  0  0  0  0  0  0  0  0  0
   -2.1434   -1.2375    0.0000 C   0  0  0  0  0  0  0  0  0  0  0  0
   -2.1434   -0.4125    0.0000 C   0  0  0  0  0  0  0  0  0  0  0  0
   -1.4289    0.0000    0.0000 C   0  0  0  0  0  0  0  0  0  0  0  0
   -0.7145   -0.4125    0.0000 C   0  0  0  0  0  0  0  0  0  0  0  0
   -2.8579    0.0000    0.0000 Cl  0  0  0  0  0  0  0  0  0  0  0  0
   -2.8579   -1.6500    0.0000 Cl  0  0  0  0  0  0  0  0  0  0  0  0
    0.7145   -3.7125    0.0000 Cl  0  0  0  0  0  0  0  0  0  0  0  0
    2.1434   -2.8875    0.0000 Cl  0  0  0  0  0  0  0  0  0  0  0  0
    0.7145   -0.4125    0.0000 H   0  0  0  0  0  0  0  0  0  0  0  0
    2.1434   -1.2375    0.0000 H   0  0  0  0  0  0  0  0  0  0  0  0
   -0.7145   -2.8875    0.0000 H   0  0  0  0  0  0  0  0  0  0  0  0
   -1.4289   -2.4750    0.0000 H   0  0  0  0  0  0  0  0  0  0  0  0
   -1.4289    0.8250    0.0000 H   0  0  0  0  0  0  0  0  0  0  0  0
    0.0000    0.0000    0.0000 H   0  0  0  0  0  0  0  0  0  0  0  0
  1  2  4  0  0  0  0
  2  3  4  0  0  0  0
  3  4  4  0  0  0  0
  4  5  4  0  0  0  0
  5  6  4  0  0  0  0
  1  6  4  0  0  0  0
  6  7  1  0  0  0  0
  7  8  4  0  0  0  0
  8  9  4  0  0  0  0
  9 10  4  0  0  0  0
 10 11  4  0  0  0  0
 11 12  4  0  0  0  0
  7 12  4  0  0  0  0
 10 13  1  0  0  0  0
  9 14  1  0  0  0  0
  4 15  1  0  0  0  0
  3 16  1  0  0  0  0
  1 17  1  0  0  0  0
  2 18  1  0  0  0  0
  5 19  1  0  0  0  0
  8 20  1  0  0  0  0
 11 21  1  0  0  0  0
 12 22  1  0  0  0  0
M  END
$$$$
133
  Mrv2314 01052423262D          

 33 34  0  0  0  0            999 V2000
    1.5395   -1.2375    0.0000 C   0  0  0  0  0  0  0  0  0  0  0  0
    0.7145   -1.2375    0.0000 C   0  0  0  0  0  0  0  0  0  0  0  0
   -0.1105   -1.2375    0.0000 C   0  0  0  0  0  0  0  0  0  0  0  0
    0.7145   -2.0625    0.0000 C   0  0  0  0  0  0  0  0  0  0  0  0
    1.4289   -2.4750    0.0000 C   0  0  0  0  0  0  0  0  0  0  0  0
    1.4289   -3.3000    0.0000 C   0  0  0  0  0  0  0  0  0  0  0  0
    0.7145   -3.7125    0.0000 C   0  0  0  0  0  0  0  0  0  0  0  0
    0.0000   -3.3000    0.0000 C   0  0  0  0  0  0  0  0  0  0  0  0
    0.0000   -2.4750    0.0000 C   0  0  0  0  0  0  0  0  0  0  0  0
   -0.7145   -3.7125    0.0000 Br  0  0  0  0  0  0  0  0  0  0  0  0
    0.7145   -4.5375    0.0000 O   0  0  0  0  0  0  0  0  0  0  0  0
    2.1434   -3.7125    0.0000 Br  0  0  0  0  0  0  0  0  0  0  0  0
    0.7145   -0.4125    0.0000 C   0  0  0  0  0  0  0  0  0  0  0  0
    0.0000    0.0000    0.0000 C   0  0  0  0  0  0  0  0  0  0  0  0
    0.0000    0.8250    0.0000 C   0  0  0  0  0  0  0  0  0  0  0  0
    0.7145    1.2375    0.0000 C   0  0  0  0  0  0  0  0  0  0  0  0
    1.4289    0.8250    0.0000 C   0  0  0  0  0  0  0  0  0  0  0  0
    1.4289   -0.0000    0.0000 C   0  0  0  0  0  0  0  0  0  0  0  0
    2.1434    1.2375    0.0000 Br  0  0  0  0  0  0  0  0  0  0  0  0
    0.7145    2.0625    0.0000 O   0  0  0  0  0  0  0  0  0  0  0  0
   -0.7145    1.2375    0.0000 Br  0  0  0  0  0  0  0  0  0  0  0  0
    1.5395   -2.0625    0.0000 H   0  0  0  0  0  0  0  0  0  0  0  0
    2.3645   -1.2375    0.0000 H   0  0  0  0  0  0  0  0  0  0  0  0
    1.5395   -0.4125    0.0000 H   0  0  0  0  0  0  0  0  0  0  0  0
   -0.1105   -0.4125    0.0000 H   0  0  0  0  0  0  0  0  0  0  0  0
   -0.9355   -1.2375    0.0000 H   0  0  0  0  0  0  0  0  0  0  0  0
   -0.1105   -2.0625    0.0000 H   0  0  0  0  0  0  0  0  0  0  0  0
    2.2469   -2.5827    0.0000 H   0  0  0  0  0  0  0  0  0  0  0  0
   -0.8179   -2.5827    0.0000 H   0  0  0  0  0  0  0  0  0  0  0  0
    0.0000   -4.9500    0.0000 H   0  0  0  0  0  0  0  0  0  0  0  0
   -0.8179    0.1077    0.0000 H   0  0  0  0  0  0  0  0  0  0  0  0
    2.2469    0.1077    0.0000 H   0  0  0  0  0  0  0  0  0  0  0  0
    1.4289    2.4750    0.0000 H   0  0  0  0  0  0  0  0  0  0  0  0
  1  2  1  0  0  0  0
  2  3  1  0  0  0  0
  2  4  1  0  0  0  0
  4  5  4  0  0  0  0
  5  6  4  0  0  0  0
  6  7  4  0  0  0  0
  7  8  4  0  0  0  0
  8  9  4  0  0  0  0
  4  9  4  0  0  0  0
  8 10  1  0  0  0  0
  7 11  1  0  0  0  0
  6 12  1  0  0  0  0
  2 13  1  0  0  0  0
 13 14  4  0  0  0  0
 14 15  4  0  0  0  0
 15 16  4  0  0  0  0
 16 17  4  0  0  0  0
 17 18  4  0  0  0  0
 13 18  4  0  0  0  0
 17 19  1  0  0  0  0
 16 20  1  0  0  0  0
 15 21  1  0  0  0  0
  1 22  1  0  0  0  0
  1 23  1  0  0  0  0
  1 24  1  0  0  0  0
  3 25  1  0  0  0  0
  3 26  1  0  0  0  0
  3 27  1  0  0  0  0
  5 28  1  0  0  0  0
  9 29  1  0  0  0  0
 11 30  1  0  0  0  0
 14 31  1  0  0  0  0
 18 32  1  0  0  0  0
 20 33  1  0  0  0  0
M  END
$$$$
134
  Mrv2314 01052423262D          

 22 23  0  0  0  0            999 V2000
    0.7145   -1.2375    0.0000 C   0  0  0  0  0  0  0  0  0  0  0  0
    1.4289   -1.6500    0.0000 C   0  0  0  0  0  0  0  0  0  0  0  0
    1.4289   -2.4750    0.0000 C   0  0  0  0  0  0  0  0  0  0  0  0
    0.7145   -2.8875    0.0000 C   0  0  0  0  0  0  0  0  0  0  0  0
    0.0000   -2.4750    0.0000 C   0  0  0  0  0  0  0  0  0  0  0  0
    0.0000   -1.6500    0.0000 C   0  0  0  0  0  0  0  0  0  0  0  0
   -0.7145   -1.2375    0.0000 Cl  0  0  0  0  0  0  0  0  0  0  0  0
    0.7145   -3.7125    0.0000 Cl  0  0  0  0  0  0  0  0  0  0  0  0
    2.1434   -1.2375    0.0000 C   0  0  0  0  0  0  0  0  0  0  0  0
    2.1434   -0.4125    0.0000 C   0  0  0  0  0  0  0  0  0  0  0  0
    2.8579   -0.0000    0.0000 C   0  0  0  0  0  0  0  0  0  0  0  0
    3.5724   -0.4125    0.0000 C   0  0  0  0  0  0  0  0  0  0  0  0
    3.5724   -1.2375    0.0000 C   0  0  0  0  0  0  0  0  0  0  0  0
    2.8579   -1.6500    0.0000 C   0  0  0  0  0  0  0  0  0  0  0  0
    4.2868   -1.6500    0.0000 Cl  0  0  0  0  0  0  0  0  0  0  0  0
    2.8579    0.8250    0.0000 Cl  0  0  0  0  0  0  0  0  0  0  0  0
    0.7145   -0.4125    0.0000 H   0  0  0  0  0  0  0  0  0  0  0  0
    2.1434   -2.8875    0.0000 H   0  0  0  0  0  0  0  0  0  0  0  0
   -0.7145   -2.8875    0.0000 H   0  0  0  0  0  0  0  0  0  0  0  0
    1.4289    0.0000    0.0000 H   0  0  0  0  0  0  0  0  0  0  0  0
    4.2868   -0.0000    0.0000 H   0  0  0  0  0  0  0  0  0  0  0  0
    2.8579   -2.4750    0.0000 H   0  0  0  0  0  0  0  0  0  0  0  0
  1  2  4  0  0  0  0
  2  3  4  0  0  0  0
  3  4  4  0  0  0  0
  4  5  4  0  0  0  0
  5  6  4  0  0  0  0
  1  6  4  0  0  0  0
  6  7  1  0  0  0  0
  4  8  1  0  0  0  0
  2  9  1  0  0  0  0
  9 10  4  0  0  0  0
 10 11  4  0  0  0  0
 11 12  4  0  0  0  0
 12 13  4  0  0  0  0
 13 14  4  0  0  0  0
  9 14  4  0  0  0  0
 13 15  1  0  0  0  0
 11 16  1  0  0  0  0
  1 17  1  0  0  0  0
  3 18  1  0  0  0  0
  5 19  1  0  0  0  0
 10 20  1  0  0  0  0
 12 21  1  0  0  0  0
 14 22  1  0  0  0  0
M  END
$$$$
135
  Mrv2314 01052423262D          

 32 33  0  0  0  0            999 V2000
    0.7145   -0.4125    0.0000 C   0  0  0  0  0  0  0  0  0  0  0  0
    0.7145   -1.2375    0.0000 C   0  0  0  0  0  0  0  0  0  0  0  0
    1.4289   -1.6500    0.0000 C   0  0  0  0  0  0  0  0  0  0  0  0
    1.4289   -2.4750    0.0000 C   0  0  0  0  0  0  0  0  0  0  0  0
    0.7145   -2.8875    0.0000 C   0  0  0  0  0  0  0  0  0  0  0  0
    0.0000   -2.4750    0.0000 C   0  0  0  0  0  0  0  0  0  0  0  0
    0.0000   -1.6500    0.0000 C   0  0  0  0  0  0  0  0  0  0  0  0
   -0.7145   -2.8875    0.0000 C   0  0  0  0  0  0  0  0  0  0  0  0
   -0.7145   -3.7125    0.0000 C   0  0  0  0  0  0  0  0  0  0  0  0
   -1.4289   -4.1250    0.0000 C   0  0  0  0  0  0  0  0  0  0  0  0
   -2.1434   -3.7125    0.0000 C   0  0  0  0  0  0  0  0  0  0  0  0
   -2.1434   -2.8875    0.0000 C   0  0  0  0  0  0  0  0  0  0  0  0
   -1.4289   -2.4750    0.0000 C   0  0  0  0  0  0  0  0  0  0  0  0
   -2.8579   -4.1250    0.0000 N   0  0  0  0  0  0  0  0  0  0  0  0
   -1.4289   -4.9500    0.0000 C   0  0  0  0  0  0  0  0  0  0  0  0
    2.1434   -1.2375    0.0000 N   0  0  0  0  0  0  0  0  0  0  0  0
    1.5395   -0.4125    0.0000 H   0  0  0  0  0  0  0  0  0  0  0  0
    0.7145    0.4125    0.0000 H   0  0  0  0  0  0  0  0  0  0  0  0
   -0.1105   -0.4125    0.0000 H   0  0  0  0  0  0  0  0  0  0  0  0
    2.1434   -2.8875    0.0000 H   0  0  0  0  0  0  0  0  0  0  0  0
    0.7145   -3.7125    0.0000 H   0  0  0  0  0  0  0  0  0  0  0  0
   -0.7145   -1.2375    0.0000 H   0  0  0  0  0  0  0  0  0  0  0  0
    0.0000   -4.1250    0.0000 H   0  0  0  0  0  0  0  0  0  0  0  0
   -2.8579   -2.4750    0.0000 H   0  0  0  0  0  0  0  0  0  0  0  0
   -1.4289   -1.6500    0.0000 H   0  0  0  0  0  0  0  0  0  0  0  0
   -3.5724   -3.7125    0.0000 H   0  0  0  0  0  0  0  0  0  0  0  0
   -2.8579   -4.9500    0.0000 H   0  0  0  0  0  0  0  0  0  0  0  0
   -2.2539   -4.9500    0.0000 H   0  0  0  0  0  0  0  0  0  0  0  0
   -1.4289   -5.7750    0.0000 H   0  0  0  0  0  0  0  0  0  0  0  0
   -0.6039   -4.9500    0.0000 H   0  0  0  0  0  0  0  0  0  0  0  0
    2.8579   -1.6500    0.0000 H   0  0  0  0  0  0  0  0  0  0  0  0
    2.1434   -0.4125    0.0000 H   0  0  0  0  0  0  0  0  0  0  0  0
  1  2  1  0  0  0  0
  2  3  4  0  0  0  0
  3  4  4  0  0  0  0
  4  5  4  0  0  0  0
  5  6  4  0  0  0  0
  6  7  4  0  0  0  0
  2  7  4  0  0  0  0
  6  8  1  0  0  0  0
  8  9  4  0  0  0  0
  9 10  4  0  0  0  0
 10 11  4  0  0  0  0
 11 12  4  0  0  0  0
 12 13  4  0  0  0  0
  8 13  4  0  0  0  0
 11 14  1  0  0  0  0
 10 15  1  0  0  0  0
  3 16  1  0  0  0  0
  1 17  1  0  0  0  0
  1 18  1  0  0  0  0
  1 19  1  0  0  0  0
  4 20  1  0  0  0  0
  5 21  1  0  0  0  0
  7 22  1  0  0  0  0
  9 23  1  0  0  0  0
 12 24  1  0  0  0  0
 13 25  1  0  0  0  0
 14 26  1  0  0  0  0
 14 27  1  0  0  0  0
 15 28  1  0  0  0  0
 15 29  1  0  0  0  0
 15 30  1  0  0  0  0
 16 31  1  0  0  0  0
 16 32  1  0  0  0  0
M  END
$$$$
136
  Mrv2314 01052423262D          

 32 33  0  0  0  0            999 V2000
    0.7145   -0.4125    0.0000 C   0  0  0  0  0  0  0  0  0  0  0  0
    0.7145   -1.2375    0.0000 C   0  0  0  0  0  0  0  0  0  0  0  0
    1.4289   -1.6500    0.0000 C   0  0  0  0  0  0  0  0  0  0  0  0
    1.4289   -2.4750    0.0000 C   0  0  0  0  0  0  0  0  0  0  0  0
    0.7145   -2.8875    0.0000 C   0  0  0  0  0  0  0  0  0  0  0  0
    0.0000   -2.4750    0.0000 C   0  0  0  0  0  0  0  0  0  0  0  0
    0.0000   -1.6500    0.0000 C   0  0  0  0  0  0  0  0  0  0  0  0
   -0.7145   -2.8875    0.0000 C   0  0  0  0  0  0  0  0  0  0  0  0
   -0.7145   -3.7125    0.0000 C   0  0  0  0  0  0  0  0  0  0  0  0
   -1.4289   -4.1250    0.0000 C   0  0  0  0  0  0  0  0  0  0  0  0
   -2.1434   -3.7125    0.0000 C   0  0  0  0  0  0  0  0  0  0  0  0
   -2.1434   -2.8875    0.0000 C   0  0  0  0  0  0  0  0  0  0  0  0
   -1.4289   -2.4750    0.0000 C   0  0  0  0  0  0  0  0  0  0  0  0
   -2.8579   -4.1250    0.0000 N   0  0  0  0  0  0  0  0  0  0  0  0
   -1.4289   -4.9500    0.0000 C   0  0  0  0  0  0  0  0  0  0  0  0
    2.1434   -1.2375    0.0000 N   0  0  0  0  0  0  0  0  0  0  0  0
    1.5395   -0.4125    0.0000 H   0  0  0  0  0  0  0  0  0  0  0  0
    0.7145    0.4125    0.0000 H   0  0  0  0  0  0  0  0  0  0  0  0
   -0.1105   -0.4125    0.0000 H   0  0  0  0  0  0  0  0  0  0  0  0
    2.1434   -2.8875    0.0000 H   0  0  0  0  0  0  0  0  0  0  0  0
    0.7145   -3.7125    0.0000 H   0  0  0  0  0  0  0  0  0  0  0  0
   -0.7145   -1.2375    0.0000 H   0  0  0  0  0  0  0  0  0  0  0  0
    0.0000   -4.1250    0.0000 H   0  0  0  0  0  0  0  0  0  0  0  0
   -2.8579   -2.4750    0.0000 H   0  0  0  0  0  0  0  0  0  0  0  0
   -1.4289   -1.6500    0.0000 H   0  0  0  0  0  0  0  0  0  0  0  0
   -3.5724   -3.7125    0.0000 H   0  0  0  0  0  0  0  0  0  0  0  0
   -2.8579   -4.9500    0.0000 H   0  0  0  0  0  0  0  0  0  0  0  0
   -2.2539   -4.9500    0.0000 H   0  0  0  0  0  0  0  0  0  0  0  0
   -1.4289   -5.7750    0.0000 H   0  0  0  0  0  0  0  0  0  0  0  0
   -0.6039   -4.9500    0.0000 H   0  0  0  0  0  0  0  0  0  0  0  0
    2.8579   -1.6500    0.0000 H   0  0  0  0  0  0  0  0  0  0  0  0
    2.1434   -0.4125    0.0000 H   0  0  0  0  0  0  0  0  0  0  0  0
  1  2  1  0  0  0  0
  2  3  4  0  0  0  0
  3  4  4  0  0  0  0
  4  5  4  0  0  0  0
  5  6  4  0  0  0  0
  6  7  4  0  0  0  0
  2  7  4  0  0  0  0
  6  8  1  0  0  0  0
  8  9  4  0  0  0  0
  9 10  4  0  0  0  0
 10 11  4  0  0  0  0
 11 12  4  0  0  0  0
 12 13  4  0  0  0  0
  8 13  4  0  0  0  0
 11 14  1  0  0  0  0
 10 15  1  0  0  0  0
  3 16  1  0  0  0  0
  1 17  1  0  0  0  0
  1 18  1  0  0  0  0
  1 19  1  0  0  0  0
  4 20  1  0  0  0  0
  5 21  1  0  0  0  0
  7 22  1  0  0  0  0
  9 23  1  0  0  0  0
 12 24  1  0  0  0  0
 13 25  1  0  0  0  0
 14 26  1  0  0  0  0
 14 27  1  0  0  0  0
 15 28  1  0  0  0  0
 15 29  1  0  0  0  0
 15 30  1  0  0  0  0
 16 31  1  0  0  0  0
 16 32  1  0  0  0  0
M  END
$$$$
137
  Mrv2314 01052423262D          

 14 14  0  0  0  0            999 V2000
    0.7145    1.2375    0.0000 C   0  0  0  0  0  0  0  0  0  0  0  0
    1.4289    0.8250    0.0000 C   0  0  0  0  0  0  0  0  0  0  0  0
    1.4289   -0.0000    0.0000 C   0  0  0  0  0  0  0  0  0  0  0  0
    0.7145   -0.4125    0.0000 C   0  0  0  0  0  0  0  0  0  0  0  0
    0.0000    0.0000    0.0000 C   0  0  0  0  0  0  0  0  0  0  0  0
    0.0000    0.8250    0.0000 C   0  0  0  0  0  0  0  0  0  0  0  0
   -0.7145    1.2375    0.0000 N   0  3  0  0  0  0  0  0  0  0  0  0
   -0.7145    2.0625    0.0000 O   0  0  0  0  0  0  0  0  0  0  0  0
   -1.4289    0.8250    0.0000 O   0  5  0  0  0  0  0  0  0  0  0  0
    0.7145   -1.2375    0.0000 Cl  0  0  0  0  0  0  0  0  0  0  0  0
    2.1434   -0.4125    0.0000 Cl  0  0  0  0  0  0  0  0  0  0  0  0
    0.7145    2.0625    0.0000 H   0  0  0  0  0  0  0  0  0  0  0  0
    2.1434    1.2375    0.0000 H   0  0  0  0  0  0  0  0  0  0  0  0
   -0.7145   -0.4125    0.0000 H   0  0  0  0  0  0  0  0  0  0  0  0
  1  2  4  0  0  0  0
  2  3  4  0  0  0  0
  3  4  4  0  0  0  0
  4  5  4  0  0  0  0
  5  6  4  0  0  0  0
  1  6  4  0  0  0  0
  6  7  1  0  0  0  0
  7  8  2  0  0  0  0
  7  9  1  0  0  0  0
  4 10  1  0  0  0  0
  3 11  1  0  0  0  0
  1 12  1  0  0  0  0
  2 13  1  0  0  0  0
  5 14  1  0  0  0  0
M  CHG  2   7   1   9  -1
M  END
$$$$
138
  Mrv2314 01052423262D          

 35 36  0  0  1  0            999 V2000
    2.1434   -1.2375    0.0000 C   0  0  0  0  0  0  0  0  0  0  0  0
    2.8579   -1.6500    0.0000 C   0  0  0  0  0  0  0  0  0  0  0  0
    2.8579   -2.4750    0.0000 C   0  0  0  0  0  0  0  0  0  0  0  0
    2.1434   -2.8875    0.0000 C   0  0  0  0  0  0  0  0  0  0  0  0
    1.4289   -2.4750    0.0000 C   0  0  0  0  0  0  0  0  0  0  0  0
    1.4289   -1.6500    0.0000 C   0  0  0  0  0  0  0  0  0  0  0  0
    0.7145   -1.2375    0.0000 O   0  0  0  0  0  0  0  0  0  0  0  0
    0.7145   -0.4125    0.0000 C   0  0  0  0  0  0  0  0  0  0  0  0
    0.0000    0.0000    0.0000 C   0  0  0  0  0  0  0  0  0  0  0  0
    0.0000    0.8250    0.0000 C   0  0  0  0  0  0  0  0  0  0  0  0
    0.7145    1.2375    0.0000 C   0  0  0  0  0  0  0  0  0  0  0  0
    1.4289    0.8250    0.0000 C   0  0  0  0  0  0  0  0  0  0  0  0
    1.4289    0.0000    0.0000 C   0  0  0  0  0  0  0  0  0  0  0  0
    2.1434   -0.4125    0.0000 I   0  0  0  0  0  0  0  0  0  0  0  0
    0.7145    2.0625    0.0000 C   0  0  0  0  0  0  0  0  0  0  0  0
    1.4289    2.4750    0.0000 C   0  0  1  0  0  0  0  0  0  0  0  0
    1.4289    3.3000    0.0000 C   0  0  0  0  0  0  0  0  0  0  0  0
    2.1434    3.7125    0.0000 O   0  0  0  0  0  0  0  0  0  0  0  0
    0.7145    3.7125    0.0000 O   0  0  0  0  0  0  0  0  0  0  0  0
    2.1434    2.0625    0.0000 N   0  0  0  0  0  0  0  0  0  0  0  0
   -0.7145   -0.4125    0.0000 I   0  0  0  0  0  0  0  0  0  0  0  0
    2.1434   -3.7125    0.0000 I   0  0  0  0  0  0  0  0  0  0  0  0
    3.5724   -2.8875    0.0000 O   0  0  0  0  0  0  0  0  0  0  0  0
    1.4289   -0.8250    0.0000 H   0  0  0  0  0  0  0  0  0  0  0  0
    3.5724   -1.2375    0.0000 H   0  0  0  0  0  0  0  0  0  0  0  0
    0.7145   -2.8875    0.0000 H   0  0  0  0  0  0  0  0  0  0  0  0
   -0.7145    1.2375    0.0000 H   0  0  0  0  0  0  0  0  0  0  0  0
    2.1434    1.2375    0.0000 H   0  0  0  0  0  0  0  0  0  0  0  0
    0.2611    2.7518    0.0000 H   0  0  0  0  0  0  0  0  0  0  0  0
   -0.1091    2.1105    0.0000 H   0  0  0  0  0  0  0  0  0  0  0  0
    0.7145    2.8875    0.0000 H   0  0  0  0  0  0  0  0  0  0  0  0
    0.3020    4.4270    0.0000 H   0  0  0  0  0  0  0  0  0  0  0  0
    2.9670    2.1105    0.0000 H   0  0  0  0  0  0  0  0  0  0  0  0
    2.5968    2.7518    0.0000 H   0  0  0  0  0  0  0  0  0  0  0  0
    3.5724   -3.7125    0.0000 H   0  0  0  0  0  0  0  0  0  0  0  0
  1  2  4  0  0  0  0
  2  3  4  0  0  0  0
  3  4  4  0  0  0  0
  4  5  4  0  0  0  0
  5  6  4  0  0  0  0
  1  6  4  0  0  0  0
  6  7  1  0  0  0  0
  7  8  1  0  0  0  0
  8  9  4  0  0  0  0
  9 10  4  0  0  0  0
 10 11  4  0  0  0  0
 11 12  4  0  0  0  0
 12 13  4  0  0  0  0
  8 13  4  0  0  0  0
 13 14  1  0  0  0  0
 11 15  1  0  0  0  0
 16 15  1  0  0  0  0
 16 17  1  0  0  0  0
 17 18  2  0  0  0  0
 17 19  1  0  0  0  0
 16 20  1  0  0  0  0
  9 21  1  0  0  0  0
  4 22  1  0  0  0  0
  3 23  1  0  0  0  0
  1 24  1  0  0  0  0
  2 25  1  0  0  0  0
  5 26  1  0  0  0  0
 10 27  1  0  0  0  0
 12 28  1  0  0  0  0
 15 29  1  0  0  0  0
 15 30  1  0  0  0  0
 16 31  1  6  0  0  0
 19 32  1  0  0  0  0
 20 33  1  0  0  0  0
 20 34  1  0  0  0  0
 23 35  1  0  0  0  0
M  END
$$$$
139
  Mrv2314 01052423262D          

 14 14  0  0  0  0            999 V2000
    0.7145    1.2375    0.0000 C   0  0  0  0  0  0  0  0  0  0  0  0
    1.4289    0.8250    0.0000 C   0  0  0  0  0  0  0  0  0  0  0  0
    1.4289   -0.0000    0.0000 C   0  0  0  0  0  0  0  0  0  0  0  0
    0.7145   -0.4125    0.0000 C   0  0  0  0  0  0  0  0  0  0  0  0
    0.0000    0.0000    0.0000 C   0  0  0  0  0  0  0  0  0  0  0  0
    0.0000    0.8250    0.0000 C   0  0  0  0  0  0  0  0  0  0  0  0
   -0.7145    1.2375    0.0000 Cl  0  0  0  0  0  0  0  0  0  0  0  0
    0.7145   -1.2375    0.0000 Cl  0  0  0  0  0  0  0  0  0  0  0  0
    2.1434    1.2375    0.0000 N   0  0  0  0  0  0  0  0  0  0  0  0
    0.7145    2.0625    0.0000 H   0  0  0  0  0  0  0  0  0  0  0  0
    2.1434   -0.4125    0.0000 H   0  0  0  0  0  0  0  0  0  0  0  0
   -0.7145   -0.4125    0.0000 H   0  0  0  0  0  0  0  0  0  0  0  0
    2.8579    0.8250    0.0000 H   0  0  0  0  0  0  0  0  0  0  0  0
    2.1434    2.0625    0.0000 H   0  0  0  0  0  0  0  0  0  0  0  0
  1  2  4  0  0  0  0
  2  3  4  0  0  0  0
  3  4  4  0  0  0  0
  4  5  4  0  0  0  0
  5  6  4  0  0  0  0
  1  6  4  0  0  0  0
  6  7  1  0  0  0  0
  4  8  1  0  0  0  0
  2  9  1  0  0  0  0
  1 10  1  0  0  0  0
  3 11  1  0  0  0  0
  5 12  1  0  0  0  0
  9 13  1  0  0  0  0
  9 14  1  0  0  0  0
M  END
$$$$
140
  Mrv2314 01052423262D          

 27 28  0  0  0  0            999 V2000
    0.0000   -2.4750    0.0000 C   0  0  0  0  0  0  0  0  0  0  0  0
    0.7145   -2.8875    0.0000 C   0  0  0  0  0  0  0  0  0  0  0  0
    0.7145   -3.7125    0.0000 C   0  0  0  0  0  0  0  0  0  0  0  0
    0.0000   -4.1250    0.0000 C   0  0  0  0  0  0  0  0  0  0  0  0
   -0.7145   -3.7125    0.0000 C   0  0  0  0  0  0  0  0  0  0  0  0
   -0.7145   -2.8875    0.0000 C   0  0  0  0  0  0  0  0  0  0  0  0
   -1.4289   -2.4750    0.0000 N   0  0  0  0  0  0  0  0  0  0  0  0
   -1.4289   -1.6500    0.0000 C   0  0  0  0  0  0  0  0  0  0  0  0
   -0.7145   -1.2375    0.0000 O   0  0  0  0  0  0  0  0  0  0  0  0
   -2.1434   -1.2375    0.0000 C   0  0  0  0  0  0  0  0  0  0  0  0
   -2.8579   -1.6500    0.0000 C   0  0  0  0  0  0  0  0  0  0  0  0
   -3.5724   -1.2375    0.0000 C   0  0  0  0  0  0  0  0  0  0  0  0
   -3.5724   -0.4125    0.0000 C   0  0  0  0  0  0  0  0  0  0  0  0
   -2.8579    0.0000    0.0000 C   0  0  0  0  0  0  0  0  0  0  0  0
   -2.1434   -0.4125    0.0000 C   0  0  0  0  0  0  0  0  0  0  0  0
   -2.8579    0.8250    0.0000 Cl  0  0  0  0  0  0  0  0  0  0  0  0
   -4.2868   -1.6500    0.0000 Cl  0  0  0  0  0  0  0  0  0  0  0  0
   -2.8579   -2.4750    0.0000 O   0  0  0  0  0  0  0  0  0  0  0  0
    0.0000   -4.9500    0.0000 Cl  0  0  0  0  0  0  0  0  0  0  0  0
    1.4289   -4.1250    0.0000 Cl  0  0  0  0  0  0  0  0  0  0  0  0
    0.0000   -1.6500    0.0000 H   0  0  0  0  0  0  0  0  0  0  0  0
    1.4289   -2.4750    0.0000 H   0  0  0  0  0  0  0  0  0  0  0  0
   -1.4289   -4.1250    0.0000 H   0  0  0  0  0  0  0  0  0  0  0  0
   -2.1434   -2.8875    0.0000 H   0  0  0  0  0  0  0  0  0  0  0  0
   -4.2868    0.0000    0.0000 H   0  0  0  0  0  0  0  0  0  0  0  0
   -1.4289    0.0000    0.0000 H   0  0  0  0  0  0  0  0  0  0  0  0
   -3.5724   -2.8875    0.0000 H   0  0  0  0  0  0  0  0  0  0  0  0
  1  2  4  0  0  0  0
  2  3  4  0  0  0  0
  3  4  4  0  0  0  0
  4  5  4  0  0  0  0
  5  6  4  0  0  0  0
  1  6  4  0  0  0  0
  6  7  1  0  0  0  0
  7  8  1  0  0  0  0
  8  9  2  0  0  0  0
  8 10  1  0  0  0  0
 10 11  4  0  0  0  0
 11 12  4  0  0  0  0
 12 13  4  0  0  0  0
 13 14  4  0  0  0  0
 14 15  4  0  0  0  0
 10 15  4  0  0  0  0
 14 16  1  0  0  0  0
 12 17  1  0  0  0  0
 11 18  1  0  0  0  0
  4 19  1  0  0  0  0
  3 20  1  0  0  0  0
  1 21  1  0  0  0  0
  2 22  1  0  0  0  0
  5 23  1  0  0  0  0
  7 24  1  0  0  0  0
 13 25  1  0  0  0  0
 15 26  1  0  0  0  0
 18 27  1  0  0  0  0
M  END
$$$$
141
  Mrv2314 01052423262D          

 32 33  0  0  1  0            999 V2000
    0.1067    4.7652    0.0000 C   0  0  0  0  0  0  0  0  0  0  0  0
   -0.6078    4.3527    0.0000 C   0  0  0  0  0  0  0  0  0  0  0  0
   -0.6078    3.5277    0.0000 C   0  0  0  0  0  0  0  0  0  0  0  0
   -1.3222    3.1152    0.0000 N   0  0  0  0  0  0  0  0  0  0  0  0
   -2.0367    3.5277    0.0000 C   0  0  0  0  0  0  0  0  0  0  0  0
   -2.7512    3.1152    0.0000 O   0  0  0  0  0  0  0  0  0  0  0  0
   -2.0367    4.3527    0.0000 N   0  0  0  0  0  0  0  0  0  0  0  0
   -1.3222    4.7652    0.0000 C   0  0  0  0  0  0  0  0  0  0  0  0
   -1.3222    5.5902    0.0000 O   0  0  0  0  0  0  0  0  0  0  0  0
   -1.3222    2.2902    0.0000 C   0  0  1  0  0  0  0  0  0  0  0  0
   -0.6548    1.8053    0.0000 C   0  0  0  0  0  0  0  0  0  0  0  0
   -0.9097    1.0206    0.0000 C   0  0  1  0  0  0  0  0  0  0  0  0
   -1.7347    1.0206    0.0000 C   0  0  2  0  0  0  0  0  0  0  0  0
   -1.9897    1.8053    0.0000 O   0  0  0  0  0  0  0  0  0  0  0  0
   -2.2197    0.3532    0.0000 C   0  0  0  0  0  0  0  0  0  0  0  0
   -3.0401    0.4394    0.0000 O   0  0  0  0  0  0  0  0  0  0  0  0
   -0.4248    0.3532    0.0000 N   0  0  0  0  0  0  0  0  0  0  0  0
    0.3957    0.4394    0.0000 N   0  3  0  0  0  0  0  0  0  0  0  0
    1.2161    0.5257    0.0000 N   0  5  0  0  0  0  0  0  0  0  0  0
    0.5192    4.0507    0.0000 H   0  0  0  0  0  0  0  0  0  0  0  0
    0.8212    5.1777    0.0000 H   0  0  0  0  0  0  0  0  0  0  0  0
   -0.3058    5.4797    0.0000 H   0  0  0  0  0  0  0  0  0  0  0  0
    0.1067    3.1152    0.0000 H   0  0  0  0  0  0  0  0  0  0  0  0
   -2.7512    4.7652    0.0000 H   0  0  0  0  0  0  0  0  0  0  0  0
   -2.0573    2.6647    0.0000 H   0  0  0  0  0  0  0  0  0  0  0  0
    0.1577    1.6620    0.0000 H   0  0  0  0  0  0  0  0  0  0  0  0
   -0.0817    2.3987    0.0000 H   0  0  0  0  0  0  0  0  0  0  0  0
   -1.2843    0.2856    0.0000 H   0  0  0  0  0  0  0  0  0  0  0  0
   -2.5496    1.1497    0.0000 H   0  0  0  0  0  0  0  0  0  0  0  0
   -2.5719   -0.3928    0.0000 H   0  0  0  0  0  0  0  0  0  0  0  0
   -2.0042   -0.4432    0.0000 H   0  0  0  0  0  0  0  0  0  0  0  0
   -3.8643    0.4774    0.0000 H   0  0  0  0  0  0  0  0  0  0  0  0
  1  2  1  0  0  0  0
  2  3  2  0  0  0  0
  3  4  1  0  0  0  0
  4  5  1  0  0  0  0
  5  6  2  0  0  0  0
  5  7  1  0  0  0  0
  7  8  1  0  0  0  0
  2  8  1  0  0  0  0
  8  9  2  0  0  0  0
 10  4  1  1  0  0  0
 10 11  1  0  0  0  0
 12 11  1  0  0  0  0
 12 13  1  0  0  0  0
 13 14  1  0  0  0  0
 10 14  1  0  0  0  0
 13 15  1  1  0  0  0
 15 16  1  0  0  0  0
 12 17  1  6  0  0  0
 17 18  2  0  0  0  0
 18 19  2  0  0  0  0
  1 20  1  0  0  0  0
  1 21  1  0  0  0  0
  1 22  1  0  0  0  0
  3 23  1  0  0  0  0
  7 24  1  0  0  0  0
 10 25  1  6  0  0  0
 11 26  1  0  0  0  0
 11 27  1  0  0  0  0
 12 28  1  1  0  0  0
 13 29  1  6  0  0  0
 15 30  1  0  0  0  0
 15 31  1  0  0  0  0
 16 32  1  0  0  0  0
M  CHG  2  18   1  19  -1
M  END
$$$$
142
  Mrv2314 01052423262D          

 17 17  0  0  0  0            999 V2000
    0.7145    2.0625    0.0000 C   0  0  0  0  0  0  0  0  0  0  0  0
    0.7145    1.2375    0.0000 C   0  0  0  0  0  0  0  0  0  0  0  0
    1.4289    0.8250    0.0000 C   0  0  0  0  0  0  0  0  0  0  0  0
    1.4289   -0.0000    0.0000 C   0  0  0  0  0  0  0  0  0  0  0  0
    0.7145   -0.4125    0.0000 C   0  0  0  0  0  0  0  0  0  0  0  0
    0.0000    0.0000    0.0000 C   0  0  0  0  0  0  0  0  0  0  0  0
    0.0000    0.8250    0.0000 C   0  0  0  0  0  0  0  0  0  0  0  0
    0.7145   -1.2375    0.0000 N   0  0  0  0  0  0  0  0  0  0  0  0
    2.1434    1.2375    0.0000 Cl  0  0  0  0  0  0  0  0  0  0  0  0
    1.5395    2.0625    0.0000 H   0  0  0  0  0  0  0  0  0  0  0  0
    0.7145    2.8875    0.0000 H   0  0  0  0  0  0  0  0  0  0  0  0
   -0.1105    2.0625    0.0000 H   0  0  0  0  0  0  0  0  0  0  0  0
    2.1434   -0.4125    0.0000 H   0  0  0  0  0  0  0  0  0  0  0  0
   -0.7145   -0.4125    0.0000 H   0  0  0  0  0  0  0  0  0  0  0  0
   -0.7145    1.2375    0.0000 H   0  0  0  0  0  0  0  0  0  0  0  0
   -0.0000   -1.6500    0.0000 H   0  0  0  0  0  0  0  0  0  0  0  0
    1.4289   -1.6500    0.0000 H   0  0  0  0  0  0  0  0  0  0  0  0
  1  2  1  0  0  0  0
  2  3  4  0  0  0  0
  3  4  4  0  0  0  0
  4  5  4  0  0  0  0
  5  6  4  0  0  0  0
  6  7  4  0  0  0  0
  2  7  4  0  0  0  0
  5  8  1  0  0  0  0
  3  9  1  0  0  0  0
  1 10  1  0  0  0  0
  1 11  1  0  0  0  0
  1 12  1  0  0  0  0
  4 13  1  0  0  0  0
  6 14  1  0  0  0  0
  7 15  1  0  0  0  0
  8 16  1  0  0  0  0
  8 17  1  0  0  0  0
M  END
$$$$
143
  Mrv2314 01052423262D          

 21 21  0  0  0  0            999 V2000
    0.0000    2.4750    0.0000 C   0  0  0  0  0  0  0  0  0  0  0  0
    0.7145    2.0625    0.0000 N   0  0  0  0  0  0  0  0  0  0  0  0
    1.4289    2.4750    0.0000 C   0  0  0  0  0  0  0  0  0  0  0  0
    0.7145    1.2375    0.0000 C   0  0  0  0  0  0  0  0  0  0  0  0
    1.4289    0.8250    0.0000 C   0  0  0  0  0  0  0  0  0  0  0  0
    1.4289   -0.0000    0.0000 C   0  0  0  0  0  0  0  0  0  0  0  0
    0.7145   -0.4125    0.0000 C   0  0  0  0  0  0  0  0  0  0  0  0
    0.0000    0.0000    0.0000 C   0  0  0  0  0  0  0  0  0  0  0  0
    0.0000    0.8250    0.0000 C   0  0  0  0  0  0  0  0  0  0  0  0
    2.1434   -0.4125    0.0000 O   0  0  0  0  0  0  0  0  0  0  0  0
    0.4125    3.1895    0.0000 H   0  0  0  0  0  0  0  0  0  0  0  0
   -0.7145    2.8875    0.0000 H   0  0  0  0  0  0  0  0  0  0  0  0
   -0.4125    1.7605    0.0000 H   0  0  0  0  0  0  0  0  0  0  0  0
    1.8414    1.7605    0.0000 H   0  0  0  0  0  0  0  0  0  0  0  0
    2.1434    2.8875    0.0000 H   0  0  0  0  0  0  0  0  0  0  0  0
    1.0164    3.1895    0.0000 H   0  0  0  0  0  0  0  0  0  0  0  0
    2.1434    1.2375    0.0000 H   0  0  0  0  0  0  0  0  0  0  0  0
    0.7145   -1.2375    0.0000 H   0  0  0  0  0  0  0  0  0  0  0  0
   -0.7145   -0.4125    0.0000 H   0  0  0  0  0  0  0  0  0  0  0  0
   -0.7145    1.2375    0.0000 H   0  0  0  0  0  0  0  0  0  0  0  0
    2.1434   -1.2375    0.0000 H   0  0  0  0  0  0  0  0  0  0  0  0
  1  2  1  0  0  0  0
  2  3  1  0  0  0  0
  2  4  1  0  0  0  0
  4  5  4  0  0  0  0
  5  6  4  0  0  0  0
  6  7  4  0  0  0  0
  7  8  4  0  0  0  0
  8  9  4  0  0  0  0
  4  9  4  0  0  0  0
  6 10  1  0  0  0  0
  1 11  1  0  0  0  0
  1 12  1  0  0  0  0
  1 13  1  0  0  0  0
  3 14  1  0  0  0  0
  3 15  1  0  0  0  0
  3 16  1  0  0  0  0
  5 17  1  0  0  0  0
  7 18  1  0  0  0  0
  8 19  1  0  0  0  0
  9 20  1  0  0  0  0
 10 21  1  0  0  0  0
M  END
$$$$
144
  Mrv2314 01052423262D          

 24 25  0  0  0  0            999 V2000
   -1.4289   -0.0000    0.0000 C   0  0  0  0  0  0  0  0  0  0  0  0
   -0.7145   -0.4125    0.0000 C   0  0  0  0  0  0  0  0  0  0  0  0
    0.0000   -0.0000    0.0000 O   0  0  0  0  0  0  0  0  0  0  0  0
    0.7145   -0.4125    0.0000 C   0  0  0  0  0  0  0  0  0  0  0  0
    1.4289    0.0000    0.0000 C   0  0  0  0  0  0  0  0  0  0  0  0
    2.1434   -0.4125    0.0000 C   0  0  0  0  0  0  0  0  0  0  0  0
    2.8579    0.0000    0.0000 C   0  0  0  0  0  0  0  0  0  0  0  0
    3.5724   -0.4125    0.0000 C   0  0  0  0  0  0  0  0  0  0  0  0
    3.5724   -1.2375    0.0000 C   0  0  0  0  0  0  0  0  0  0  0  0
    2.8579   -1.6500    0.0000 C   0  0  0  0  0  0  0  0  0  0  0  0
    2.1434   -1.2375    0.0000 C   0  0  0  0  0  0  0  0  0  0  0  0
    1.4289   -1.6500    0.0000 O   0  0  0  0  0  0  0  0  0  0  0  0
    0.7145   -1.2375    0.0000 C   0  0  0  0  0  0  0  0  0  0  0  0
    0.0000   -1.6500    0.0000 O   0  0  0  0  0  0  0  0  0  0  0  0
   -1.0164    0.7145    0.0000 H   0  0  0  0  0  0  0  0  0  0  0  0
   -2.1434    0.4125    0.0000 H   0  0  0  0  0  0  0  0  0  0  0  0
   -1.8414   -0.7145    0.0000 H   0  0  0  0  0  0  0  0  0  0  0  0
   -1.0847   -1.1497    0.0000 H   0  0  0  0  0  0  0  0  0  0  0  0
   -0.3442   -1.1497    0.0000 H   0  0  0  0  0  0  0  0  0  0  0  0
    1.4289    0.8250    0.0000 H   0  0  0  0  0  0  0  0  0  0  0  0
    2.8579    0.8250    0.0000 H   0  0  0  0  0  0  0  0  0  0  0  0
    4.2868   -0.0000    0.0000 H   0  0  0  0  0  0  0  0  0  0  0  0
    4.2868   -1.6500    0.0000 H   0  0  0  0  0  0  0  0  0  0  0  0
    2.8579   -2.4750    0.0000 H   0  0  0  0  0  0  0  0  0  0  0  0
  1  2  1  0  0  0  0
  2  3  1  0  0  0  0
  3  4  1  0  0  0  0
  4  5  2  0  0  0  0
  5  6  1  0  0  0  0
  6  7  4  0  0  0  0
  7  8  4  0  0  0  0
  8  9  4  0  0  0  0
  9 10  4  0  0  0  0
 10 11  4  0  0  0  0
  6 11  4  0  0  0  0
 11 12  1  0  0  0  0
 12 13  1  0  0  0  0
  4 13  1  0  0  0  0
 13 14  2  0  0  0  0
  1 15  1  0  0  0  0
  1 16  1  0  0  0  0
  1 17  1  0  0  0  0
  2 18  1  0  0  0  0
  2 19  1  0  0  0  0
  5 20  1  0  0  0  0
  7 21  1  0  0  0  0
  8 22  1  0  0  0  0
  9 23  1  0  0  0  0
 10 24  1  0  0  0  0
M  END
$$$$
145
  Mrv2314 01052423262D          

 24 26  0  0  0  0            999 V2000
    1.9339    1.5105    0.0000 C   0  0  0  0  0  0  0  0  0  0  0  0
    2.6014    1.0256    0.0000 C   0  0  0  0  0  0  0  0  0  0  0  0
    2.3464    0.2410    0.0000 C   0  0  0  0  0  0  0  0  0  0  0  0
    2.8985   -0.3721    0.0000 C   0  0  0  0  0  0  0  0  0  0  0  0
    3.7054   -0.2006    0.0000 C   0  0  0  0  0  0  0  0  0  0  0  0
    3.9604    0.5840    0.0000 C   0  0  0  0  0  0  0  0  0  0  0  0
    3.4084    1.1971    0.0000 C   0  0  0  0  0  0  0  0  0  0  0  0
    4.2575   -0.8137    0.0000 O   0  0  0  0  0  0  0  0  0  0  0  0
    1.5214    0.2410    0.0000 C   0  0  0  0  0  0  0  0  0  0  0  0
    0.9694   -0.3721    0.0000 C   0  0  0  0  0  0  0  0  0  0  0  0
    0.1624   -0.2006    0.0000 C   0  0  0  0  0  0  0  0  0  0  0  0
   -0.0925    0.5840    0.0000 C   0  0  0  0  0  0  0  0  0  0  0  0
    0.4595    1.1971    0.0000 C   0  0  0  0  0  0  0  0  0  0  0  0
    1.2665    1.0256    0.0000 C   0  0  0  0  0  0  0  0  0  0  0  0
    2.3213    2.2389    0.0000 H   0  0  0  0  0  0  0  0  0  0  0  0
    1.5466    2.2389    0.0000 H   0  0  0  0  0  0  0  0  0  0  0  0
    2.6435   -1.1567    0.0000 H   0  0  0  0  0  0  0  0  0  0  0  0
    4.7674    0.7556    0.0000 H   0  0  0  0  0  0  0  0  0  0  0  0
    3.6633    1.9817    0.0000 H   0  0  0  0  0  0  0  0  0  0  0  0
    4.0025   -1.5983    0.0000 H   0  0  0  0  0  0  0  0  0  0  0  0
    1.2243   -1.1567    0.0000 H   0  0  0  0  0  0  0  0  0  0  0  0
   -0.3896   -0.8137    0.0000 H   0  0  0  0  0  0  0  0  0  0  0  0
   -0.8995    0.7556    0.0000 H   0  0  0  0  0  0  0  0  0  0  0  0
    0.2046    1.9817    0.0000 H   0  0  0  0  0  0  0  0  0  0  0  0
  1  2  1  0  0  0  0
  2  3  4  0  0  0  0
  3  4  4  0  0  0  0
  4  5  4  0  0  0  0
  5  6  4  0  0  0  0
  6  7  4  0  0  0  0
  2  7  4  0  0  0  0
  5  8  1  0  0  0  0
  3  9  1  0  0  0  0
  9 10  4  0  0  0  0
 10 11  4  0  0  0  0
 11 12  4  0  0  0  0
 12 13  4  0  0  0  0
 13 14  4  0  0  0  0
  9 14  4  0  0  0  0
  1 14  1  0  0  0  0
  1 15  1  0  0  0  0
  1 16  1  0  0  0  0
  4 17  1  0  0  0  0
  6 18  1  0  0  0  0
  7 19  1  0  0  0  0
  8 20  1  0  0  0  0
 10 21  1  0  0  0  0
 11 22  1  0  0  0  0
 12 23  1  0  0  0  0
 13 24  1  0  0  0  0
M  END
$$$$
146
  Mrv2314 01052423262D          

 24 23  0  0  0  0            999 V2000
    2.9980    2.5559    0.0000 C   0  0  0  0  0  0  0  0  0  0  0  0
    3.7125    2.1434    0.0000 C   0  0  0  0  0  0  0  0  0  0  0  0
    4.4270    2.5559    0.0000 C   0  0  0  0  0  0  0  0  0  0  0  0
    5.1414    2.1434    0.0000 C   0  0  0  0  0  0  0  0  0  0  0  0
    5.8559    2.5559    0.0000 N   0  0  0  0  0  0  0  0  0  0  0  0
    6.5704    2.1434    0.0000 C   0  0  0  0  0  0  0  0  0  0  0  0
    6.5704    1.3184    0.0000 O   0  0  0  0  0  0  0  0  0  0  0  0
    7.2849    2.5559    0.0000 O   0  0  0  0  0  0  0  0  0  0  0  0
    7.9993    2.1434    0.0000 C   0  0  0  0  0  0  0  0  0  0  0  0
    8.7138    2.5559    0.0000 C   0  0  0  0  0  0  0  0  0  0  0  0
    9.4283    2.9684    0.0000 C   0  0  0  0  0  0  0  0  0  0  0  0
   10.1427    3.3809    0.0000 I   0  0  0  0  0  0  0  0  0  0  0  0
    3.4105    3.2704    0.0000 H   0  0  0  0  0  0  0  0  0  0  0  0
    2.2836    2.9684    0.0000 H   0  0  0  0  0  0  0  0  0  0  0  0
    2.5855    1.8414    0.0000 H   0  0  0  0  0  0  0  0  0  0  0  0
    3.3422    1.4062    0.0000 H   0  0  0  0  0  0  0  0  0  0  0  0
    4.0828    1.4062    0.0000 H   0  0  0  0  0  0  0  0  0  0  0  0
    4.7972    3.2932    0.0000 H   0  0  0  0  0  0  0  0  0  0  0  0
    4.0567    3.2932    0.0000 H   0  0  0  0  0  0  0  0  0  0  0  0
    4.7712    1.4062    0.0000 H   0  0  0  0  0  0  0  0  0  0  0  0
    5.5117    1.4062    0.0000 H   0  0  0  0  0  0  0  0  0  0  0  0
    5.8559    3.3809    0.0000 H   0  0  0  0  0  0  0  0  0  0  0  0
    7.6291    1.4062    0.0000 H   0  0  0  0  0  0  0  0  0  0  0  0
    8.3696    1.4062    0.0000 H   0  0  0  0  0  0  0  0  0  0  0  0
  1  2  1  0  0  0  0
  2  3  1  0  0  0  0
  3  4  1  0  0  0  0
  4  5  1  0  0  0  0
  5  6  1  0  0  0  0
  6  7  2  0  0  0  0
  6  8  1  0  0  0  0
  8  9  1  0  0  0  0
  9 10  1  0  0  0  0
 10 11  3  0  0  0  0
 11 12  1  0  0  0  0
  1 13  1  0  0  0  0
  1 14  1  0  0  0  0
  1 15  1  0  0  0  0
  2 16  1  0  0  0  0
  2 17  1  0  0  0  0
  3 18  1  0  0  0  0
  3 19  1  0  0  0  0
  4 20  1  0  0  0  0
  4 21  1  0  0  0  0
  5 22  1  0  0  0  0
  9 23  1  0  0  0  0
  9 24  1  0  0  0  0
M  END
$$$$
147
  Mrv2314 01052423262D          

 22 22  0  0  0  0            999 V2000
    0.0000    2.4750    0.0000 C   0  0  0  0  0  0  0  0  0  0  0  0
    0.7145    2.0625    0.0000 C   0  0  0  0  0  0  0  0  0  0  0  0
    1.4289    2.4750    0.0000 C   0  0  0  0  0  0  0  0  0  0  0  0
    0.7145    1.2375    0.0000 C   0  0  0  0  0  0  0  0  0  0  0  0
    1.4289    0.8250    0.0000 C   0  0  0  0  0  0  0  0  0  0  0  0
    1.4289   -0.0000    0.0000 C   0  0  0  0  0  0  0  0  0  0  0  0
    0.7145   -0.4125    0.0000 C   0  0  0  0  0  0  0  0  0  0  0  0
    0.0000    0.0000    0.0000 C   0  0  0  0  0  0  0  0  0  0  0  0
    0.0000    0.8250    0.0000 C   0  0  0  0  0  0  0  0  0  0  0  0
    2.1434   -0.4125    0.0000 O   0  0  0  0  0  0  0  0  0  0  0  0
    0.4125    3.1895    0.0000 H   0  0  0  0  0  0  0  0  0  0  0  0
   -0.7145    2.8875    0.0000 H   0  0  0  0  0  0  0  0  0  0  0  0
   -0.4125    1.7605    0.0000 H   0  0  0  0  0  0  0  0  0  0  0  0
    0.7145    2.8875    0.0000 H   0  0  0  0  0  0  0  0  0  0  0  0
    1.6425    1.6781    0.0000 H   0  0  0  0  0  0  0  0  0  0  0  0
    2.2539    2.4750    0.0000 H   0  0  0  0  0  0  0  0  0  0  0  0
    1.6425    3.2719    0.0000 H   0  0  0  0  0  0  0  0  0  0  0  0
    2.2477    0.7241    0.0000 H   0  0  0  0  0  0  0  0  0  0  0  0
    0.7145   -1.2375    0.0000 H   0  0  0  0  0  0  0  0  0  0  0  0
   -0.7145   -0.4125    0.0000 H   0  0  0  0  0  0  0  0  0  0  0  0
   -0.7145    1.2375    0.0000 H   0  0  0  0  0  0  0  0  0  0  0  0
    2.1434   -1.2375    0.0000 H   0  0  0  0  0  0  0  0  0  0  0  0
  1  2  1  0  0  0  0
  2  3  1  0  0  0  0
  2  4  1  0  0  0  0
  4  5  4  0  0  0  0
  5  6  4  0  0  0  0
  6  7  4  0  0  0  0
  7  8  4  0  0  0  0
  8  9  4  0  0  0  0
  4  9  4  0  0  0  0
  6 10  1  0  0  0  0
  1 11  1  0  0  0  0
  1 12  1  0  0  0  0
  1 13  1  0  0  0  0
  2 14  1  0  0  0  0
  3 15  1  0  0  0  0
  3 16  1  0  0  0  0
  3 17  1  0  0  0  0
  5 18  1  0  0  0  0
  7 19  1  0  0  0  0
  8 20  1  0  0  0  0
  9 21  1  0  0  0  0
 10 22  1  0  0  0  0
M  END
$$$$
148
  Mrv2314 01052423262D          

 17 17  0  0  0  0            999 V2000
    0.7145    2.0625    0.0000 C   0  0  0  0  0  0  0  0  0  0  0  0
    0.7145    1.2375    0.0000 C   0  0  0  0  0  0  0  0  0  0  0  0
    1.4289    0.8250    0.0000 C   0  0  0  0  0  0  0  0  0  0  0  0
    1.4289   -0.0000    0.0000 C   0  0  0  0  0  0  0  0  0  0  0  0
    0.7145   -0.4125    0.0000 C   0  0  0  0  0  0  0  0  0  0  0  0
    0.0000    0.0000    0.0000 C   0  0  0  0  0  0  0  0  0  0  0  0
    0.0000    0.8250    0.0000 C   0  0  0  0  0  0  0  0  0  0  0  0
    2.1434   -0.4125    0.0000 N   0  0  0  0  0  0  0  0  0  0  0  0
    1.5395    2.0625    0.0000 H   0  0  0  0  0  0  0  0  0  0  0  0
    0.7145    2.8875    0.0000 H   0  0  0  0  0  0  0  0  0  0  0  0
   -0.1105    2.0625    0.0000 H   0  0  0  0  0  0  0  0  0  0  0  0
    2.1434    1.2375    0.0000 H   0  0  0  0  0  0  0  0  0  0  0  0
    0.7145   -1.2375    0.0000 H   0  0  0  0  0  0  0  0  0  0  0  0
   -0.7145   -0.4125    0.0000 H   0  0  0  0  0  0  0  0  0  0  0  0
   -0.7145    1.2375    0.0000 H   0  0  0  0  0  0  0  0  0  0  0  0
    2.1434   -1.2375    0.0000 H   0  0  0  0  0  0  0  0  0  0  0  0
    2.8579   -0.0000    0.0000 H   0  0  0  0  0  0  0  0  0  0  0  0
  1  2  1  0  0  0  0
  2  3  4  0  0  0  0
  3  4  4  0  0  0  0
  4  5  4  0  0  0  0
  5  6  4  0  0  0  0
  6  7  4  0  0  0  0
  2  7  4  0  0  0  0
  4  8  1  0  0  0  0
  1  9  1  0  0  0  0
  1 10  1  0  0  0  0
  1 11  1  0  0  0  0
  3 12  1  0  0  0  0
  5 13  1  0  0  0  0
  6 14  1  0  0  0  0
  7 15  1  0  0  0  0
  8 16  1  0  0  0  0
  8 17  1  0  0  0  0
M  END
$$$$
149
  Mrv2314 01052423262D          

 17 17  0  0  0  0            999 V2000
    0.7145    2.0625    0.0000 C   0  0  0  0  0  0  0  0  0  0  0  0
    0.7145    1.2375    0.0000 C   0  0  0  0  0  0  0  0  0  0  0  0
    1.4289    0.8250    0.0000 C   0  0  0  0  0  0  0  0  0  0  0  0
    1.4289   -0.0000    0.0000 C   0  0  0  0  0  0  0  0  0  0  0  0
    0.7145   -0.4125    0.0000 C   0  0  0  0  0  0  0  0  0  0  0  0
    0.0000    0.0000    0.0000 C   0  0  0  0  0  0  0  0  0  0  0  0
    0.0000    0.8250    0.0000 C   0  0  0  0  0  0  0  0  0  0  0  0
    2.1434   -0.4125    0.0000 N   0  3  0  0  0  0  0  0  0  0  0  0
    2.8579   -0.0000    0.0000 O   0  0  0  0  0  0  0  0  0  0  0  0
    2.1434   -1.2375    0.0000 O   0  5  0  0  0  0  0  0  0  0  0  0
    1.5395    2.0625    0.0000 H   0  0  0  0  0  0  0  0  0  0  0  0
    0.7145    2.8875    0.0000 H   0  0  0  0  0  0  0  0  0  0  0  0
   -0.1105    2.0625    0.0000 H   0  0  0  0  0  0  0  0  0  0  0  0
    2.1434    1.2375    0.0000 H   0  0  0  0  0  0  0  0  0  0  0  0
    0.7145   -1.2375    0.0000 H   0  0  0  0  0  0  0  0  0  0  0  0
   -0.7145   -0.4125    0.0000 H   0  0  0  0  0  0  0  0  0  0  0  0
   -0.7145    1.2375    0.0000 H   0  0  0  0  0  0  0  0  0  0  0  0
  1  2  1  0  0  0  0
  2  3  4  0  0  0  0
  3  4  4  0  0  0  0
  4  5  4  0  0  0  0
  5  6  4  0  0  0  0
  6  7  4  0  0  0  0
  2  7  4  0  0  0  0
  4  8  1  0  0  0  0
  8  9  2  0  0  0  0
  8 10  1  0  0  0  0
  1 11  1  0  0  0  0
  1 12  1  0  0  0  0
  1 13  1  0  0  0  0
  3 14  1  0  0  0  0
  5 15  1  0  0  0  0
  6 16  1  0  0  0  0
  7 17  1  0  0  0  0
M  CHG  2   8   1  10  -1
M  END
$$$$
150
  Mrv2314 01052423262D          

 26 27  0  0  0  0            999 V2000
   -0.7145   -1.2375    0.0000 C   0  0  0  0  0  0  0  0  0  0  0  0
    0.0000   -1.6500    0.0000 C   0  0  0  0  0  0  0  0  0  0  0  0
    0.0000   -2.4750    0.0000 C   0  0  0  0  0  0  0  0  0  0  0  0
   -0.7145   -2.8875    0.0000 C   0  0  0  0  0  0  0  0  0  0  0  0
   -1.4289   -2.4750    0.0000 C   0  0  0  0  0  0  0  0  0  0  0  0
   -1.4289   -1.6500    0.0000 C   0  0  0  0  0  0  0  0  0  0  0  0
   -0.7145   -3.7125    0.0000 O   0  0  0  0  0  0  0  0  0  0  0  0
    0.0000   -4.1250    0.0000 C   0  0  0  0  0  0  0  0  0  0  0  0
    0.7145   -3.7125    0.0000 C   0  0  0  0  0  0  0  0  0  0  0  0
    1.4289   -4.1250    0.0000 C   0  0  0  0  0  0  0  0  0  0  0  0
    1.4289   -4.9500    0.0000 C   0  0  0  0  0  0  0  0  0  0  0  0
    0.7145   -5.3625    0.0000 C   0  0  0  0  0  0  0  0  0  0  0  0
    0.0000   -4.9500    0.0000 C   0  0  0  0  0  0  0  0  0  0  0  0
    0.7145   -6.1875    0.0000 C   0  0  0  0  0  0  0  0  0  0  0  0
    1.4289   -6.6000    0.0000 O   0  0  0  0  0  0  0  0  0  0  0  0
   -0.0000   -6.6000    0.0000 O   0  0  0  0  0  0  0  0  0  0  0  0
   -0.7145   -0.4125    0.0000 H   0  0  0  0  0  0  0  0  0  0  0  0
    0.7145   -1.2375    0.0000 H   0  0  0  0  0  0  0  0  0  0  0  0
    0.7145   -2.8875    0.0000 H   0  0  0  0  0  0  0  0  0  0  0  0
   -2.1434   -2.8875    0.0000 H   0  0  0  0  0  0  0  0  0  0  0  0
   -2.1434   -1.2375    0.0000 H   0  0  0  0  0  0  0  0  0  0  0  0
    0.0000   -3.3000    0.0000 H   0  0  0  0  0  0  0  0  0  0  0  0
    2.1434   -3.7125    0.0000 H   0  0  0  0  0  0  0  0  0  0  0  0
    2.1434   -5.3625    0.0000 H   0  0  0  0  0  0  0  0  0  0  0  0
   -0.7145   -5.3625    0.0000 H   0  0  0  0  0  0  0  0  0  0  0  0
   -0.7145   -6.1875    0.0000 H   0  0  0  0  0  0  0  0  0  0  0  0
  1  2  4  0  0  0  0
  2  3  4  0  0  0  0
  3  4  4  0  0  0  0
  4  5  4  0  0  0  0
  5  6  4  0  0  0  0
  1  6  4  0  0  0  0
  4  7  1  0  0  0  0
  7  8  1  0  0  0  0
  8  9  4  0  0  0  0
  9 10  4  0  0  0  0
 10 11  4  0  0  0  0
 11 12  4  0  0  0  0
 12 13  4  0  0  0  0
  8 13  4  0  0  0  0
 12 14  1  0  0  0  0
 14 15  2  0  0  0  0
 14 16  1  0  0  0  0
  1 17  1  0  0  0  0
  2 18  1  0  0  0  0
  3 19  1  0  0  0  0
[truncated: 3,225,306 more chars]
