# Supplementary material for: Insights into pharmacokinetic properties for exposure chemicals: predictive modelling of human plasma fraction unbound (fu) and hepatocyte intrinsic clearance (Clint) data using machine learning
Source: Royal Society of Chemistry journal article supplement (doi:10.1039/d4dd00082j), 2024-01-01
Supplement: d4dd00082j2.xlsx [file d4dd00082j2.xlsx]

## Sheet: Sheet1
Compound ID	SMILEs	Clint	Fu
1	C[C@]12CCCC([C@@H]1CC[C@@]3([C@@H]2CCO3)C)(C)C	2.25	0.01541
2	CN1CCC[C@H]1C2=CN=CC=C2	4.44	0.406			*Yellow Highlighted Rows represents the test set compounds
3	CC(C(=O)OC)OC1=CC=C(C=C1)OC2=C(C=C(C=C2)Cl)Cl	6.45	0
4	CC(=O)O[C@@H]1[C@@H](SC2=CC=CC=C2N(C1=O)CCN(C)C)C3=CC=C(C=C3)OC	13.63	0.198
5	CC(C)C(CCCN(C)CCC1=CC(=C(C=C1)OC)OC)(C#N)C2=CC(=C(C=C2)OC)OC	12.7	0.1
6	COC1=CC=C(C=C1)CO	90.03	0.9392
7	CCCCC[C@@H](CC(=O)CCC1=CC(=C(C=C1)O)OC)O	146	0.141
8	CC(C)[C@H](C1=CC=C(C=C1)Cl)C(=O)O[C@@H](C#N)C2=CC(=CC=C2)OC3=CC=CC=C3	0.77	0
9	C[C@@]1(C(=O)N(C(=N1)SC)NC2=CC=CC=C2)C3=CC=CC=C3	17.74	0.02436
10	CC(C)NC[C@@H](COC1=CC=CC2=CC=CC=C21)O	7.4	0.15
11	CC(C)(C)NC[C@@H](COC1=NSN=C1N2CCOCC2)O	3.82	0.4
12	CC(=O)C[C@@H](C1=CC=CC=C1)C2=C(C3=CC=CC=C3OC2=O)O	1.05	0.011
13	CC(=CCC/C(=C\CO)/C)C	1.57	0
14	CC1=C(C(=CC=C1)NC2=CC(=NC(=N2)SCC(=O)O)Cl)C	7.51	0.00545
15	CCC(C)N(C)C(=O)C1=CC2=CC=CC=C2C(=N1)C3=CC=CC=C3Cl	42.12	0.01614
16	C1CC(=O)N(C1)CCO	0.16	1
17	CC1(C(=O)NC(=O)N1CO)C	13.1	0.921
18	CC1=C(C2=C(N1C(=O)C3=CC=C(C=C3)Cl)C=CC(=C2)OC)CC(=O)O	9.35	0.0103
19	C1=CC=C(C(=C1)O)O	42.3	0.0268
20	C(C(F)(F)F)F	0.1	0.8572
21	CC(Cl)(Cl)Cl	0.12	0.6658
22	C(C(F)(Cl)Cl)(F)(F)Cl	0.25	0.3622
23	C=C(Cl)Cl	123.5	0.428
24	C1(C(C(C(C(C1Cl)Cl)Cl)Cl)Cl)Cl	0	0.01695
25	C1=CC2=NNN=C2C=C1	0	0.287
26	C1=CC(=C(C(=C1)Cl)Cl)Cl	6.98	0.01567
27	C1=C(C(=CC(=C1Cl)Cl)Cl)Cl	8.84	0.00099
28	CC1=CC(=C(C=C1)C)C	9.32	0.1556
29	C1=CC=C2C(=C1)C(=O)NS2	34.74	0
30	C(CCl)Cl	21.34	0.6167
31	CC(CCl)Cl	57.19	0.5441
32	CC1=C(C(=CC=C1)[N+](=O)[O-])C	523	0
33	C1=CC=C(C(=C1)[N+](=O)[O-])[N+](=O)[O-]	24.2	0.06949
34	C1=CC=C(C=C1)OCCOC2=CC=CC=C2	18.51	0
35	C1=CC=C(C=C1)NNC2=CC=CC=C2	19	0
36	C=CC=C	23.89	0.5027
37	CC(C)C1=CC(=CC=C1)C(C)C	7.79	0.01237
38	C1=CC(=CC(=C1)[N+](=O)[O-])[N+](=O)[O-]	0	0.391
39	C1=CC=C(C=C1)NC(=NC2=CC=CC=C2)N	0	0.7844
40	CC(C)NC1=C2C(=C(C=C1)NC(C)C)C(=O)C3=CC=CC=C3C2=O	0	0.00728
41	C1=CC(=CC=C1Cl)Cl	130	0.02291
42	C1COCCO1	3.49	0.9398
43	C1CC=CCCC=CCCC=C1	17.28	0.04143
44	C1=CC2=C(C=CC=C2N)C(=C1)N	0	0.6333
45	CN(C)C(=O)C1(CCN(CC1)CCC2(CN(CCO2)C(=O)C3=CC=CC=C3)C4=CC(=C(C=C4)Cl)Cl)N5CCCCC5	13.6	0.0127
46	CCCCCC(=O)O[C@@]1(CC[C@@H]2[C@@]1(CC[C@H]3[C@H]2CCC4=CC(=O)CC[C@]34C)C)C(=O)C	195	0.0175
47	C[C@]12CC[C@H]3[C@H]([C@@H]1CC[C@H]2O)CCC4=C3C=CC(=C4)O	55.6	4e-05
48	C[C@]12CC[C@H]3[C@H]([C@@H]1CC[C@]2(C#C)O)CCC4=C3C=CC(=C4)O	0	0.014
49	C[C@]12CC[C@H]3[C@H]([C@@H]1CC[C@@H]2O)CCC4=C3C=CC(=C4)O	56.9	0
50	C[C@]12C=CC3=C4CCC(=O)C=C4CC[C@H]3[C@@H]1CC[C@@H]2O	37.4	0.0999
51	C[C@]12CCC(=O)C=C1CC[C@@H]3[C@@H]2CC[C@]4([C@H]3CC[C@]4(C)O)C	12.7	0.0329
52	C1=C(C=C(C(=C1Cl)N)Cl)[N+](=O)[O-]	4.43	0
53	C1=CC=C(C=C1)C[N+]2=CC=CC3=CC=CC=C32.[Cl-]	7.31	0.599
54	CCCCCCCCCCCCN1CCCC1=O	19.1	0.0125
55	CN1C=C(C(=O)C(=C1)C2=CC(=CC=C2)C(F)(F)F)C3=CC=CC=C3	5.59	0.1378
56	CC1=CC=CC=C1	17.66	0.3
57	CNC(=O)OC1=CC=CC2=CC=CC=C21	27.27	0.6922
58	C1=CC=C2C(=C1)C=CC=C2O	0	0.0682
59	CC(C)C1=C(C(=CC=C1)C(C)C)N2C(=O)C3=C(C2=O)C=C(C=C3)O	47	0.0415
60	CC1=C(C=CC(=C1)Cl)OCC(=O)O	0	0.01797
61	CC(C(=O)O)OC1=CC(=CC=C1)Cl	0	0.02239
62	CC(=C)C(=O)OCCC(C(C(C(C(C(F)(F)F)(F)F)(F)F)(F)F)(F)F)(F)F	196.9	0.02654
63	CCCCCC/C(=C\C1=CC=CC=C1)/C=O	14.36	0.00981
64	C1=CC=C2C(=C1)N=C(S2)SCSC#N	29.6	0.331
65	C1=CC(=C(C(=C1Cl)C2=C(C=CC(=C2Cl)Cl)Cl)Cl)Cl	0	0
66	C1=C(C(=CC(=C1Cl)Cl)Cl)C2=CC(=C(C=C2Cl)Cl)Cl	0	0
67	C1=C(C=C(C(=C1Cl)C2=C(C=C(C=C2Cl)Cl)Cl)Cl)Cl	0	0
68	C1=CC(=C(C=C1O)O)C(=O)C2=C(C=C(C=C2)O)O	19.2	0.0354
69	CC(C)C(C(C)(C)COC(=O)C(C)C)OC(=O)C(C)C	9.95	0
70	CC(C)(C1=CC(=C(C(=C1)Cl)O)Cl)C2=CC(=C(C(=C2)Cl)O)Cl	18.7	0.00598
71	C1=CC(=CC=C1C(C2=CC=C(C=C2)O)C(Cl)(Cl)Cl)O	136.5	0
72	C1=CC=C(C(=C1)CC2=CC=CC=C2O)O	83.5	0.041
73	C(C(F)(F)F)(Cl)Cl	51.48	0.5388
74	CC1=CC(=C(C(=C1)C(C)(C)C)O)CC2=C(C(=CC(=C2)C)C(C)(C)C)O	22.4	0
75	CCC1=CC(=C(C(=C1)C(C)(C)C)O)CC2=C(C(=CC(=C2)CC)C(C)(C)C)O	0	0.00513
76	C1=CC=C(C=C1)C(=O)C2=C(C(=C(C=C2)O)O)O	94.1	0.0185
77	CC1=C(C(=C(C=C1)C)O)C	106	0.0908
78	CC1(CC2=C(O1)C(=CC=C2)O)C	0	0.364
79	C1=CC(=CC=C1C(=O)C2=C(C=C(C=C2)O)O)O	21.1	0.0196
80	C1=CC=C2C(=C1)C(=O)OC23C4=CC(=C(C(=C4OC5=C(C(=C(C=C35)Br)O)Br)Br)O)Br	0	0.003
81	C1=C(C(=CC(=C1Cl)Cl)Cl)O	26.24	0.00532
82	C1=C(C(=CC(=C1Cl)Cl)Cl)OCC(=O)O	0	0.0127
83	C1=C(C=C(C(=C1Cl)O)Cl)Cl	18.76	0.01512
84	CC1=CC(=C(C(=C1)C)O)C	163	0.109
85	CC(C)NC1=NC(=NC(=N1)Cl)NC(C)C	14.6	0.03651
86	C1=CC(=C(C=C1Cl)Cl)OCC(=O)O	0	0.04001
87	C1=CC(=C(C=C1Cl)Cl)OCCCC(=O)O	0	0.00662
88	C1=CC=C(C=C1)C(=O)C2=C(C=C(C=C2)O)O	39.3	0.0113
89	C1=CC(=C(C=C1[N+](=O)[O-])[N+](=O)[O-])O	0	0.02723
90	CC1=C(C=C(C=C1)[N+](=O)[O-])[N+](=O)[O-]	0	0.09602
91	CC(C)(C)C1=CC(=C(C=C1)O)C(C)(C)C	2.52	0.144
92	CCC(C)(C)C1=CC(=C(C=C1O)C(C)(C)CC)O	11.4	0.0166
93	CC(C)(C)C1=CC(=C(C=C1O)C(C)(C)C)O	117	0
94	CN(C)CCCN(C)CCCN(C)C	0	0.0383
95	C1=CC(=C(C(=C1)Cl)C#N)Cl	7.04	0.06222
96	CCC1=C(C(=CC=C1)CC)N	16.13	0.08962
97	CCCCCCCCCCCCCN1CC(OC(C1)C)C	12.91	0.00268
98	CC1=C(C(=CC=C1)C)N	8.96	0.4311
99	CC1=C(C(=CC=C1)C)O	20.52	0.2086
100	CC1=C(C=CC=C1[N+](=O)[O-])[N+](=O)[O-]	34.64	0.131
101	CC(C)(C)C1=CC(=CC(=C1O)C(C)(C)C)CN(C)C	1.55	0.2649
102	CC(C)(C)C1=C(C(=CC=C1)C(C)(C)C)O	0	0.01953
103	C1=CC=C(C(=C1)CC2=CC=C(C=C2)O)O	56.8	0.0426
104	CCOCCOCCOCCO	0	1
105	CCN(CC)C1=CC(=C(C=C1)C(=O)C2=CC=CC=C2C(=O)O)O	2	0.00517
106	C1=CC=C2C(=C1)C(=O)C3=C(C2=O)C=C(C=C3)N	30.8	0.0305
107	COC1=CC=CC=C1N	0	0.4532
108	CCCCOCCO	4.3	0.8332
109	CCCCCCC(CCCC)CO	0.66	1
110	C1=CC=C(C=C1)C2=CC(=C(C=C2)O)Cl	49.2	0
111	C1=CC=C(C=C1)NC(=O)CCl	38.9	0.401
112	CCOC1=CC=CC=C1C(=O)N	1.3	0.5
113	CCC1=C(C(=O)C=CO1)O	81	0.606
114	CCCCC(CC)C(=O)O	1.72	0.1316
115	C(C(F)(F)F)(C(F)(F)F)F	5.05	0.4582
116	COC1=CC(=C(C=C1)C(=O)C2=CC=CC=C2)O	15.7	0.00952
117	C1=CC=C2C(=C1)NC(=S)N2	0	0.4
118	C1=CC=C2C(=C1)NC(=S)S2	37.3	0.0215
119	CCCC1=CC(=C(C=C1)O)OC	24.6	0.0707
120	CC1=CC(=C(C=C1)OC)N	19.53	0.4043
121	COC1=CC=CC=C1O	44.9	0.569
122	CC1=CC=CC=C1N	0	0.713
123	C1=CC=C2C=C(C=CC2=C1)N	18.5	0.1099
124	C1C2=CC=CC=C2C3=C1C=C(C=C3)[N+](=O)[O-]	9.54	1
125	C1=CC=C(C=C1)OCCO	17.89	0.2957
126	C1=CC=C(C=C1)C2=CC=CC=C2O	2.08	0.04105
127	CCC1=CC(=C(C=C1)O)C(C)(C)C	102	0.0454
128	CC(C)(C)C1=C(C=CC(=C1)OC)O	7.06	0.07217
129	CC1=CC(=C(C=C1)C(C)(C)C)O	36	0.0264
130	CC(C)(C)C1=CC=CC=C1O	59.7	0.00012
131	CC(C)NC(=O)N1CC(=O)N(C1=O)C2=CC(=CC(=C2)Cl)Cl	11.7	0
132	C1=CC(=C(C=C1C2=CC(=C(C=C2)Cl)Cl)Cl)Cl	0	0
133	CC(C)(C1=CC(=C(C(=C1)Br)O)Br)C2=CC(=C(C(=C2)Br)O)Br	50.5	0.00107
134	C1=C(C=C(C=C1Cl)Cl)C2=CC(=CC(=C2)Cl)Cl	0	0
135	CC1=C(C=CC(=C1)C2=CC(=C(C=C2)N)C)N	0	0.1427
136	CC1=C(C=CC(=C1)C2=CC(=C(C=C2)N)C)N.Cl.Cl	25.4	0.115
137	C1=CC(=C(C=C1[N+](=O)[O-])Cl)Cl	387	0
138	C1=CC(=C(C=C1OC2=C(C=C(C=C2I)C[C@@H](C(=O)O)N)I)I)O	0	3e-05
139	C1=C(C=C(C=C1Cl)Cl)N	86.1	0.0522
140	C1=CC(=C(C=C1NC(=O)C2=C(C(=CC(=C2)Cl)Cl)O)Cl)Cl	0	0
141	CC1=CN(C(=O)NC1=O)[C@H]2C[C@@H]([C@H](O2)CO)N=[N+]=[N-]	2.41	0.914
142	CC1=C(C=C(C=C1)N)Cl	65.3	0.145
143	CN(C)C1=CC(=CC=C1)O	0	0.242
144	CCOC1=CC2=CC=CC=C2OC1=O	26	0.22
145	C1C2=C(C=C(C=C2)O)C3=CC=CC=C31	20.56	0.02488
146	CCCCNC(=O)OCC#CI	486	0.719
147	CC(C)C1=CC(=CC=C1)O	19.9	0.14
148	CC1=CC(=CC=C1)N	32.9	0.549
149	CC1=CC(=CC=C1)[N+](=O)[O-]	16.82	0.07728
150	C1=CC=C(C=C1)OC2=CC=CC(=C2)C(=O)O	0	0.00716
151	CC(C)(C)C1=CC(=CC=C1)O	40.2	0.116
152	CC(C)(C)CC(C)(C)C1=CC=C(C=C1)O	26.98	0.01902
153	CC(C)(C)C1=CC=C(C=C1)O	26.8	0.1052
154	CCC(C)(C)C1=CC=C(C=C1)O	20.96	0
155	CC(C)(C1=CC=CC=C1)C2=CC=C(C=C2)NC3=CC=C(C=C3)C(C)(C)C4=CC=CC=C4	0	0
156	C1=CC=C(C=C1)C(CCC2=CC=C(C=C2)Cl)(CN3C=NC=N3)C#N	21.7	0.0188
157	CCC(C)C1=CC=C(C=C1)O	19.03	0.0608
158	CCCCCCOC1=CC=C(C=C1)O	83.6	0.00077
159	CN(CCCC(=O)C1=CN=CC=C1)N=O	4.54	0.9647
160	C1=CC=C2C(=C1)C3=CC=CC=C3C2(C4=CC=C(C=C4)O)C5=CC=C(C=C5)O	22.4	0
161	CC(C)(C1=CC=C(C=C1)OC2=CC=C(C=C2)N)C3=CC=C(C=C3)OC4=CC=C(C=C4)N	0	0
162	C1COCCN1CCOCCN2CCOCC2	2.57	1
163	CC(C1=CC=C(C=C1)O)(C2=CC=C(C=C2)O)C3=CC=C(C=C3)O	30.8	0.0141
164	C1=CN=CC=C1C2=CC=NC=C2	0	0.319
165	CC(CCC(=O)O)(C1=CC=C(C=C1)O)C2=CC=C(C=C2)O	0	0.163
166	C1=CC(=CC=C1CC2=CC=C(C=C2)N)N	3.37	0.261
167	CCC1=CC(=CC(=C1N)CC)CC2=CC(=C(C(=C2)CC)N)CC	8.2	0.00874
168	CN(C)C1=CC=C(C=C1)CC2=CC=C(C=C2)N(C)C	18.85	0.00111
169	CC1=C(C=CC(=C1)CC2=CC(=C(C=C2)N)C)N	3.98	0.2257
170	C1=CC(=CC=C1N)OC2=CC=C(C=C2)N	0	0.3284
171	C1=CC(=CC=C1O)S(=O)(=O)C2=CC=C(C=C2)O	0	0.0576
172	CC1=CC(=CC(=C1O)[N+](=O)[O-])[N+](=O)[O-]	0	0.00264
173	C1=CC(=CC=C1C(=O)O)N	0	0.766
174	C[C@]12CCC(=O)C=C1CC[C@@H]3[C@@H]2CC[C@]4([C@H]3CCC4=O)C	25.92	0.1744
175	C1=CC=C(C=C1)NC2=CC=C(C=C2)O	75.1	0.0582
176	CCCCC1=CC=C(C=C1)N	26.4	0.0599
177	CCCCOC1=CC=C(C=C1)N	28.4	0.165
178	CCCCC1=CC=C(C=C1)O	127	0.0358
179	C1=CC(=C(C=C1Cl)N)N	31.6	0.373
180	CC1=CC=C(C=C1)C2=C(N=C(N2S(=O)(=O)N(C)C)C#N)Cl	10	0.051
181	CC1=C(C=CC(=C1)Cl)N	8.06	0
182	CC1=C(C=CC(=C1)O)Cl	0	0.0723
183	C1=CC(=CC=C1N)Cl	0	0.264
184	CC(C)(C1=CC=CC=C1)C2=CC=C(C=C2)O	27.2	0.0231
185	CC1=C(C(=O)N(N1C)C2=CC=CC=C2)N(C)C	4.1	1
186	CCOC1=CC=C(C=C1)N	13.8	0.485
187	CCCCCCCC1=CC=C(C=C1)O	42.5	0.00365
188	CCCCCCC1=CC=C(C=C1)N	440	0.00695
189	CCCCCCOC1=CC=C(C=C1)N	79.3	0.0252
190	CC1(C)CC(O)CC(C)(C)N1[O]	10.4	1
191	COC1=C(C=CC(=C1)C=O)O	234	0.322
192	C1=CC=C(C(=C1)CC(=O)O)NC2=C(C=C(C=C2Cl)O)Cl	0.01	0.017
193	CC/C(=C(\C1=CC=C(C=C1)O)/C2=CC=C(C=C2)OCCN(C)C)/C3=CC=CC=C3	16	0.0153
194	CC1=CC(=C(C=C1)O)C(C)(C)C	20.9	0.0272
195	CC1=CC=C(C=C1)C(=O)C2=CC=CC=C2	118	0.0188
196	C1COCCN1C=O	0.4	0.9528
197	C1=CC(=CC=C1N)[N+](=O)[O-]	23.6	0
198	C1=CC(=CC=C1[N+](=O)[O-])O	14	0.141
199	C1=CC=C(C=C1)NC2=CC=C(C=C2)N=O	839	0.123
200	CC1=CC=C(C=C1)[N+](=O)[O-]	19.32	0.2659
201	CCCCCCCCC1=CC=C(C=C1)O	15.65	0
202	CCCCCC1=CC=C(C=C1)N	18.2	0.0234
203	CCCC1=CC=C(C=C1)N	17.3	0.136
204	CC(C)(C)C1=CC=C(C=C1)N	10.7	0.155
205	CC1(C(=O)N(C(=O)N1)C2=CC(=C(C=C2)[N+](=O)[O-])C(F)(F)F)C	0	0.167
206	C1=CC=C(C=C1)C2(C(=O)NC(=O)N2)C3=CC=CC=C3	0.82	0.1624
207	C[C@]12CCC(=O)C[C@@H]1CC[C@@H]3[C@@H]2CC[C@]4([C@H]3CC[C@@H]4O)C	70.7	0.0313
208	CC1=C(C=C(C=C1)N)O	16	0.604
209	C1=CC(=C(C=C1[N+](=O)[O-])Cl)NC(=O)C2=C(C=CC(=C2)Cl)O	12	0
210	CCCCCCCC1CCC(=O)O1	9.47	0.069
211	COC1=C(C=C(C=C1)[N+](=O)[O-])N	12.03	0.3359
212	CC1=CC2=C(C=C1)N=CC=C2	134	0.101
213	C1=CC=C(C=C1)C2=NC(=NC(=N2)N)N	1.18	0.343
214	CCCC1=CC(=O)NC(=S)N1	1.32	0.4736
215	C1=NC2=C(N1)C(=S)N=C(N2)N	2.36	0.804
216	CC1=C2C=CC3=CC=CC=C3C2=C(C4=CC=CC=C14)C	3.23	0
217	C1=CC(=CC=C1C2=COC3=C(C2=O)C=CC(=C3)O)O	15.4	0.0553
218	C1=CC2=C(C(=C1)O)N=CC=C2	69.68	0.1184
219	COC1=C2C(=CC3=C1OC=C3)C=CC(=O)O2	0	0.09
220	C1=CC=C2C(=C1)C=C(C3=CC=CC=C23)O	20.98	0.00544
222	CCCC(=O)NC1=CC(=C(C=C1)OCC(CNC(C)C)O)C(=O)C	1.99	0.74
223	C1CC2=CC=CC3=C2C1=CC=C3	4.85	0.04533
224	C1=CC2=C3C(=C1)C=CC3=CC=C2	12.38	0.01116
225	CC(=O)NP(=O)(OC)SC	0	0.8684
226	CC(=O)NC1=CC=C(C=C1)O	0.36	0.9398
227	CC(=NC#N)N(C)CC1=CN=C(C=C1)Cl	0	0.5732
228	CCC1=CC=CC(=C1N(COCC)C(=O)CCl)C	84.71	0.1598
229	CC(=O)C1=CC=CC=C1	0	0.326
230	CCCCOC(=O)CC(CC(=O)OCCCC)(C(=O)OCCCC)OC(=O)C	261	0.00942
231	CSC(=O)C1=C2C(=CC=C1)N=NS2	863	0.0232
232	C1=CC(=C(C=C1C(F)(F)F)Cl)OC2=CC(=C(C=C2)[N+](=O)[O-])C(=O)O	0	0.0111
233	C=CC#N	32.11	0.8632
234	C[C@H]1[C@H]([C@H](C[C@@H](O1)O[C@H]2C[C@@](CC3=C2C(=C4C(=C3O)C(=O)C5=C(C4=O)C(=CC=C5)OC)O)(C(=O)CO)O)N)O.Cl	0	0.157
235	COC1=C2C3=C(C(=O)CC3)C(=O)OC2=C4[C@@H]5C=CO[C@@H]5OC4=C1	11.28	0.1045
236	CCC1=C(C(=CC=C1)CC)N(COC)C(=O)CCl	62.9	0.1332
237	CC(C)(C)NCC(C1=CC(=C(C=C1)O)CO)O	0	0.92
238	CC(C)(/C=N/OC(=O)NC)SC	0.75	0.4809
239	CC(C)(/C=N/OC(=O)NC)S(=O)(=O)C	0	0.948
240	C1[C@@H]2C=C[C@H]1[C@H]3[C@@H]2[C@]4(C(=C([C@@]3(C4(Cl)Cl)Cl)Cl)Cl)Cl	0	0.0134
241	CCC(=O)N(C1=CC=CC=C1)C2(CCN(CC2)CCN3C(=O)N(N=N3)CC)COC	0	0.086
242	CC1=C(C(=O)CC1OC(=O)C2C(C2(C)C)C=C(C)C)CC=C	2.59	0.2902
243	CC1=CC(=C(C=C1S(=O)(=O)[O-])OC)N=NC2=C(C=CC3=C2C=CC(=C3)S(=O)(=O)[O-])O.[Na+].[Na+]	0	0.0137
244	CC1=CCCC(C1/C=C(\C)/C(=O)C)(C)C	10.8	0.00633
245	CC1=NN=C2N1C3=C(C=C(C=C3)Cl)C(=NC2)C4=CC=CC=C4	0.39	0.32
246	CC(C)NCC(COC1=CC=CC=C1CC=C)O	22.98	1
247	CCNC1=NC(=NC(=N1)SC)NC(C)C	31.51	0.00395
248	CCC1(CCC(=O)NC1=O)C2=CC=C(C=C2)N	0.72	0.563
249	C1=CC(=CC=C1C(=O)N[C@@H](CCC(=O)O)C(=O)O)NCC2=CN=C3C(=N2)C(=NC(=N3)N)N	0	0.75
250	CCCCC1=C(C2=CC=CC=C2O1)C(=O)C3=CC(=C(C(=C3)I)OCCN(CC)CC)I.Cl	4.54	0
251	CC1=CC(=C(C=C1)N=CN(C)C=NC2=C(C=C(C=C2)C)C)C	33.3	0
252	CN(C)CCC=C1C2=CC=CC=C2CCC3=CC=CC=C31	12.46	0.05
253	C(=O)(C(C(C(C(C(C(C(F)(F)F)(F)F)(F)F)(F)F)(F)F)(F)F)(F)F)[O-].[NH4+]	0	0.00363
254	CCC1(C(=O)NC(=O)NC1=O)CCC(C)C	0	0.39
255	CC1([C@@H](N2[C@H](S1)[C@@H](C2=O)NC(=O)[C@@H](C3=CC=C(C=C3)O)N)C(=O)O)C	3	0.85
256	CC(CC1=CC=CC=C1)N	0.51	0.3282
257	C1=CC=C(C(=C1)NC2=NC(=NC(=N2)Cl)Cl)Cl	22.5	0
258	C1=CC=C2C=C3C=CC=CC3=CC2=C1	13.33	0.0252
259	C1=CC(=CC=C1C2=CC(=O)C3=C(C=C(C=C3O2)O)O)O	138	0.0001
260	CN1CCC2=C3[C@H]1CC4=C(C3=CC=C2)C(=C(C=C4)O)O.CN1CCC2=C3[C@H]1CC4=C(C3=CC=C2)C(=C(C=C4)O)O.O.Cl.Cl	17.4	0.0723
261	C/C(=C\C1=CC=C(C=C1)OCCN2CCOCC2)/C3=CC4=C(C=C3)C(CCC4(C)C)(C)C	0	0
262	CC(=O)OC1=CC=CC=C1C(=O)O	8.57	0.532
263	COC(=O)NS(=O)(=O)C1=CC=C(C=C1)N	1.8	0.456
264	CC(C)NCC(COC1=CC=C(C=C1)CC(=O)N)O	1.99	0.94
265	CC(C)C1=C(C(=C(N1CC[C@H](C[C@H](CC(=O)O)O)O)C2=CC=C(C=C2)F)C3=CC=CC=C3)C(=O)NC4=CC=CC=C4	0	0.02
266	CCNC1=NC(=NC(=N1)Cl)NC(C)C	6.21	0.1237
267	CN1[C@@H]2CC[C@H]1CC(C2)OC(=O)C(CO)C3=CC=CC=C3	0.5	0.61
268	CN(C)C1=CC=C(C=C1)C(=N)C2=CC=C(C=C2)N(C)C.Cl	8.66	0.107
269	COP(=O)(OC)SCN1C2=C(C=C(C=N2)Cl)OC1=O	429	0.553
270	CN1C=NC(=C1SC2=NC=NC3=C2NC=N3)[N+](=O)[O-]	0	0.32
271	COP(=S)(OC)SCN1C(=O)C2=CC=CC=C2N=N1	32.63	0.2137
272	C1=CC=C(C=C1)N=NC2=CC=CC=C2	73.7	0
273	CO/C=C(\C1=CC=CC=C1OC2=NC=NC(=C2)OC3=CC=CC=C3C#N)/C(=O)OC	32.39	0.04763
274	CC[NH+]=C1C=CC(=C(C2=CC=C(C=C2)N(CC)CC)C3=CC=C(C=C3)N(CC)CC)C4=CC=CC=C14.[Cl-]	3.21	0
275	CC1=C(N(C2=C1C=C(C=C2)O)CC3=CC=C(C=C3)OCCN4CCCCCC4)C5=CC=C(C=C5)O	17.78	0.02
276	C1=CC=C(C=C1)NS(=O)(=O)C2=CC=CC(=C2)/C=C/C(=O)NO	0.7	0.06
277	CC1(OC2=C(O1)C(=CC=C2)OC(=O)NC)C	21.66	0.1971
278	CCCCN(CC)C1=C(C=C(C=C1[N+](=O)[O-])C(F)(F)F)[N+](=O)[O-]	17.34	0
279	C1=CC=C(C=C1)NC(=O)C2=CC=CC=C2I	21.4	0.07513
280	CCCCNC(=O)N1C2=CC=CC=C2N=C1NC(=O)OC	26	0
281	COC1=CC(=NC(=N1)NC(=O)NS(=O)(=O)CC2=CC=CC=C2C(=O)OC)OC	1.65	0.00905
282	CC(C)OP(=S)(OC(C)C)SCCNS(=O)(=O)C1=CC=CC=C1	250.3	0.00608
283	CC(C)N1C(=O)C2=CC=CC=C2NS1(=O)=O	0	0.02147
284	C1=CC=C2C(=C1)C=CC3=CC4=CC=CC=C4C=C32	18.27	0.01121
285	C1=CC=CC=C1	3.34	0.46
286	C1=CC=C2C3=C4C(=CC=C3)C5=CC=CC=C5C4=CC2=C1	5.56	0.01059
287	C1=CC=C2C3=C4C(=CC2=C1)C=CC5=C4C(=CC=C5)C=C3	3.71	0.3826
288	CCOC(=O)C1=CC=C(C=C1)N	132	0.338
289	C1=CC=C(C=C1)C(=O)C2=CC=CC=C2	9.13	0.06543
290	CN(C)CCCOC1=NN(C2=CC=CC=C21)CC3=CC=CC=C3	9	0.8
291	C1=CC=C(C=C1)COC(=O)C2=CC=C(C=C2)O	633	0.00674
292	CCCCOC(=O)C1=CC=CC=C1C(=O)OCC2=CC=CC=C2	427	0
293	C1=CC=C(C=C1)COC(=O)C2=CC=CC=C2O	841	0
294	CCCCCCCCCC[N+](C)(C)CC1=CC=CC=C1.[Cl-]	63.1	0.0104
295	CC(C)COCC(CN(CC1=CC=CC=C1)C2=CC=CC=C2)N3CCCC3	2	0.001
296	C1CN(CCC1CC2=CC=C(C=C2)F)CCS(=O)C3=CC4=C(C=C3)NC(=O)O4	5.31	0.0385
297	CC(C)NCC(COC1=CC=C(C=C1)CCOCC2CC2)O	2.14	0.4
298	CC(CS(=O)(=O)C1=CC=C(C=C1)F)(C(=O)NC2=CC(=C(C=C2)C#N)C(F)(F)F)O	0	0.0323
299	CC(C)OC(=O)NNC1=C(C=CC(=C1)C2=CC=CC=C2)OC	41.15	0.836
300	CC1=C(C=CC=C1C2=CC=CC=C2)COC(=O)[C@@H]3[C@@H](C3(C)C)/C=C(/C(F)(F)F)\Cl	0	0
301	COC1=CC=C(C=C1)C2=COC3=CC(=CC(=C3C2=O)O)O	230	0.0203
302	C1=CC=C(C=C1)C2=CC=CC=C2	14.18	0.01557
303	CC(C)OP(=O)(C)OC(C)C	0	0.9727
304	CCCCC(CC)COC(=O)CCCCCCCC(=O)OCC(CC)CCCC	3.15	0.03126
305	CCCCC(CC)COC(=O)CCCCC(=O)OCC(CC)CCCC	13.56	0.03861
306	CN(C)C1=CC=C(C=C1)C(=O)C2=CC=C(C=C2)N(C)C	39.2	0.00959
307	CN(C)C(=S)SSC(=S)N(C)C	816	0
308	C1=CC(=CC=C1/C=C/C(=O)CC(=O)/C=C/C2=CC=C(C=C2)O)O	112	0
309	CC(C)NCC(COC1=CC=C(C=C1)COCCOC(C)C)O	1.6	0.66
310	CC(C)(C1=CC=C(C=C1)O)C2=CC=C(C=C2)O	19.9	0.0385
311	C1=CC(=CC=C1C(C2=CC=C(C=C2)O)(C(F)(F)F)C(F)(F)F)O	125	0.00685
312	CCC(C)(C1=CC=C(C=C1)O)C2=CC=C(C=C2)O	35.66	0.01823
313	COC1=CC(=NC(=N1)OC2=C(C(=CC=C2)OC3=NC(=CC(=N3)OC)OC)C(=O)[O-])OC.[Na+]	0	0.0106
314	B([C@H](CC(C)C)NC(=O)[C@H](CC1=CC=CC=C1)NC(=O)C2=NC=CN=C2)(O)O	7.66	0.17
315	C1=CC=C(C(=C1)C2=CC=C(C=C2)Cl)NC(=O)C3=C(N=CC=C3)Cl	17.28	0.03201
316	CC(C)(C)C1=CC=C(C=C1)S(=O)(=O)NC2=C(C(=NC(=N2)C3=NC=CC=N3)OCCO)OC4=CC=CC=C4OC	2.34	0.02
317	CCC(C)N1C(=O)C(=C(NC1=O)C)Br	0	0.0852
318	CC(C)C[C@H]1C(=O)N2CCC[C@H]2[C@]3(N1C(=O)[C@](O3)(C(C)C)NC(=O)[C@H]4CN([C@@H]5CC6=C(NC7=CC=CC(=C67)C5=C4)Br)C)O	37	0.07
319	CC(C)C[C@H]1C(=O)N2CCC[C@H]2[C@]3(N1C(=O)[C@](O3)(C(C)C)NC(=O)[C@H]4CN([C@@H]5CC6=C(NC7=CC=CC(=C67)C5=C4)Br)C)O.CS(=O)(=O)O	178	0.00955
320	C(F)(F)(F)Br	5.05	0.838
321	C1=C(C=C(C(=C1Br)O)Br)C#N	7.87	0.5001
322	CCC1=CC=CC2=C1OC(=C2)C(CNC(C)(C)C)O	15.8	0.176
323	CCCCN1CCCCC1C(=O)NC2=C(C=CC=C2C)C	13.24	0.056
324	C[C@]([C@H]1C[C@@]23CC[C@@]1([C@H]4[C@@]25CCN([C@@H]3CC6=C5C(=C(C=C6)O)O4)CC7CC7)OC)(C(C)(C)C)O	30.37	0.04
325	CC(C)N1C(=NC(C)(C)C)SCN(C1=O)C2=CC=CC=C2	18.47	0.00036
326	C1CCC2(C1)CC(=O)N(C(=O)C2)CCCCN3CCN(CC3)C4=NC=CC=N4	7.66	0.05
327	CS(=O)(=O)OCCCCOS(=O)(=O)C	1.39	1
328	CCCCOCN(C1=C(C=CC=C1CC)CC)C(=O)CCl	100.8	0
329	CC(C)N(CC1=CC=CC=C1)C(=O)C(C)(C)C	9.85	0.2267
330	CCCCC1(C(=O)NC(=O)NC1=O)CC	1.9	0.6
331	CCC(C)NC1=C(C=C(C=C1[N+](=O)[O-])C(C)(C)C)[N+](=O)[O-]	31.35	0
332	CCCCOC(=O)C1=CC=CC=C1	864	0.313
333	CCSC(=O)N(CC(C)C)CC(C)C	52.51	0
334	CCCCOC(=O)C1=CC=C(C=C1)O	39.3	0.04157
335	C1=CC(=CC=C1C2=CC=C(C=C2)N)N	6.91	0.1977
336	C1=CC(=N)C=CC1=C(C2=CC=C(C=C2)N)C3=CC=C(C=C3)N.Cl	3.23	0.235
337	C1=CC=C(C=C1)C(=O)NC2=CC3=CC(=C(C(=C3C=C2)O)N=NC4=CC=C(C=C4)N=NC5=CC=C(C=C5)S(=O)(=O)[O-])S(=O)(=O)[O-].[Na+].[Na+]	1.49	4e-05
338	COC1=C(C=CC(=C1)C2=CC(=C(C=C2)N)OC)N	18.05	0.3343
339	COC1=C(C=CC(=C1)C2=CC(=C(C=C2)N)OC)N.Cl.Cl	3.23	0.201
340	CCN(CCC#N)C1=CC=C(C=C1)N=NC2=C(C=C(C=C2Cl)[N+](=O)[O-])Cl	0	0.00145
341	CC1=CC(=C(C=C1)N=NC2=C(C=CC3=CC=CC=C32)O)C	0	0
342	CCN(CC)C1=CC2=C(C=C1)C3(C4=C(O2)C=C(C=C4)N(CC)CC)C5=CC=CC=C5C(=O)O3	13.9	0.0456
343	C1=CC=C(C=C1)N=NC2=CC=C(C=C2)N	15.7	0.0171
344	C1=CC=C(C=C1)N=NC2=C(C=CC3=CC=CC=C32)O	0	0.00277
345	C1=CC=C(C=C1)NC2=C(C=C(C=C2)S(=O)(=O)NC3=CC=CC=C3)[N+](=O)[O-]	109.1	0
346	CN1C=NC2=C1C(=O)N(C(=O)N2C)C	0.29	1
347	COCCOC[C@H](CC1(CCCC1)C(=O)NC2CCC(CC2)C(=O)O)C(=O)OC3=CC4=C(CCC4)C=C3	9.9	0.2659
348	C1CCC(=O)NCC1	0	0.761
349	C[C@H](CS)C(=O)N1CCC[C@H]1C(=O)O	57.11	0.73
350	CC(=O)C1=CC2=C(C=C1)OC([C@@H]([C@H]2NC(=O)C3=CC=C(C=C3)F)O)(C)C	0	0.187
351	C1=CC=C2C(=C1)C=CC3=CC=CC=C3N2C(=O)N	2.38	0.5141
352	CCNC(=O)OC1CCN(CC1)C2=NN=CC3=CC(=C(C=C32)OC)OC	64.57	0.08
353	COC(=O)NC1=NC2=CC=CC=C2N1	24	0.4872
354	CC1(CC2=C(O1)C(=CC=C2)OC(=O)NC)C	0	0.4213
355	C(Cl)(Cl)(Cl)Cl	4.28	0.6105
356	CCCCN(CCCC)SN(C)C(=O)OC1=CC=CC2=C1OC(C2)(C)C	26.74	0
357	CC1=C(SCCO1)C(=O)NC2=CC=CC=C2	24.41	0.175
358	CC(C)C1=C(C=C(C=C1)C(=O)N=C(N)N)S(=O)(=O)C.CS(=O)(=O)O	0	0.451
359	CC1=C2C(=CC(=C1C(=O)O)O)C(=O)C3=C(C2=O)C(=C(C(=C3O)O)[C@H]4[C@@H]([C@H]([C@@H]([C@H](O4)CO)O)O)O)O	88.8	0
360	COC1=CC=CC=C1OCCNCC(COC2=CC=CC3=C2C4=CC=CC=C4N3)O	98.52	0.02
361	CCN1CCN(C(=O)C1=O)C(=O)N[C@H](C2=CC=C(C=C2)O)C(=O)N[C@H]3[C@@H]4N(C3=O)C(=C(CS4)CSC5=NN=NN5C)C(=O)O	3	0.07
362	CC(C)C1=C(C(=C(C(=N1)C(C)C)COC)C2=CC=C(C=C2)F)/C=C/[C@H](C[C@H](CC(=O)O)O)O	6.1	0.01
363	C1CN(CCN1CCOCC(=O)O)C(C2=CC=CC=C2)C3=CC=C(C=C3)Cl	0	0.01
364	C1=CC(=CC=C1[C@H]([C@@H](CO)NC(=O)C(Cl)Cl)O)[N+](=O)[O-]	0.72	0.34
365	CN=C1CN(C(=C2C=C(C=CC2=N1)Cl)C3=CC=CC=C3)O	8	0.15
366	CCOP(=S)(OCC)OC(C(Cl)(Cl)Cl)Cl	617	0.00394
367	CC(=O)O.CC(=O)O.C1=CC(=CC=C1N/C(=N/C(=NCCCCCCN=C(/N=C(/NC2=CC=C(C=C2)Cl)\N)N)N)/N)Cl	0	0.00236
368	C1=CC=C(C=C1)N2C(=O)C(=C(C=N2)N)Cl	1.87	0.4273
369	C1=CC=C(C=C1)Cl	879.1	0.202
370	C(Cl)(Cl)Cl	46.47	0.5672
371	COC1=CC(=C(C=C1Cl)OC)Cl	6.31	0.5774
372	C1=CC=C(C=C1)C(C2=CC=C(C=C2)Cl)C(=O)C3C(=O)C4=CC=CC=C4C3=O	0	0
373	C(#N)C1=C(C(=C(C(=C1Cl)Cl)Cl)C#N)Cl	0	0.378
374	COC1=CC=C(C=C1)C(=C(C2=CC=C(C=C2)OC)Cl)C3=CC=C(C=C3)OC	0	0
375	CN(C)CCC(C1=CC=C(C=C1)Cl)C2=CC=CC=N2	2.88	0.7
376	CN(C)CCCN1C2=CC=CC=C2SC3=C1C=C(C=C3)Cl	195.1	0.05
377	CN(C)CCCN1C2=CC=CC=C2SC3=C1C=C(C=C3)Cl.Cl	5.43	0.0235
378	CC(C)OC(=O)NC1=CC(=CC=C1)Cl	78.1	0.0833
379	CN(C)CC/C=C\1/C2=CC=CC=C2SC3=C1C=C(C=C3)Cl	14	0.01
380	CCOP(=S)(OCC)OC1=NC(=C(C=C1Cl)Cl)Cl	2.6	0.00793
381	COP(=S)(OC)OC1=NC(=C(C=C1Cl)Cl)Cl	24.1	0
382	COC(=O)C1=C(C(=C(C(=C1Cl)Cl)C(=O)OC)Cl)Cl	38.62	0.01666
383	C1=CC=C(C=C1)C2=CC(=O)C3=C(C=C(C=C3O2)O)O	204	0.00263
384	CC1=C(N=CN1)CSCCNC(=NC)NC#N	5.45	0.78
385	CC1=CC=CC=C1CO[C@@H]2C[C@]3(CC[C@@]2(O3)C)C(C)C	28.17	0
386	C1CC1N2C=C(C(=O)C3=CC(=C(C=C32)N4CCNCC4)F)C(=O)O	4.17	0.7
387	CC1=NC=CN1C2=CC=C(C=C2)SC3=CC=CC(=C3)C4(CCOCC4)C(=O)N.CS(=O)(=O)O	2.79	0.0645
388	C1[C@@H]([C@H](O[C@H]1N2C=NC3=C(N=C(N=C32)Cl)N)CO)O	0	0.9848
389	CN1C(=O)CC(=O)N(C2=C1C=CC(=C2)Cl)C3=CC=CC=C3	27	0.21
390	C[C@H](C(=O)OCC#C)OC1=CC=C(C=C1)OC2=C(C=C(C=N2)Cl)F	1010	0.0148
391	C1=CC=C(C(=C1)C2=NN=C(N=N2)C3=CC=CC=C3Cl)Cl	0	0
392	CCOC(=O)C(C)(C)OC1=CC=C(C=C1)Cl	868	0
393	CC1(CON(C1=O)CC2=CC=CC=C2Cl)C	3.04	0.1734
394	CN(C)CCCN1C2=CC=CC=C2CCC3=C1C=C(C=C3)Cl.Cl	0	0.041
395	C1C(=O)NC2=C(C=C(C=C2)[N+](=O)[O-])C(=N1)C3=CC=CC=C3Cl	15	0.21
396	C1=CC(=NC(=C1Cl)C(=O)O)Cl	0.93	0.438
397	C1=CC(=NC(=C1Cl)C(=O)O)Cl.C(CO)N	0	0.464
398	C1=CC=C(C=C1)CC2=C(C=CC(=C2)Cl)O	4.53	0
399	CN/C(=N\[N+](=O)[O-])/NCC1=CN=C(S1)Cl	10.73	0.5059
400	C1=CC=C(C=C1)C(C2=CC=CC=C2)(C3=CC=CC=C3Cl)N4C=CN=C4	77.1	0.00953
401	CN1CCN(CC1)C2=NC3=C(C=CC(=C3)Cl)NC4=CC=CC=C42	8.57	0.05
402	CN1CC[C@]23[C@@H]4[C@H]1CC5=C2C(=C(C=C5)OC)O[C@H]3[C@H](C=C4)O	24.53	1
403	CC(=O)N[C@H]1CCC2=CC(=C(C(=C2C3=CC=C(C(=O)C=C13)OC)OC)OC)OC	0.7	0.61
404	C[C@]12CCC(=O)C=C1CC[C@@H]3[C@@H]2[C@H](C[C@]4([C@H]3CC[C@@H]4C(=O)CO)C)O	12.1	0.137
405	CN1[C@@H](CCC1=O)C2=CN=CC=C2	0	0
406	CCOP(=S)(OCC)OC1=CC2=C(C=C1)C(=C(C(=O)O2)Cl)C	31.7	0
407	C1=CC=C2C(=C1)C=CC(=O)O2	0	0.1922
408	COC1=C(C=C(C=C1)OC(F)(F)F)CN[C@H]2CCCN[C@H]2C3=CC=CC=C3	6.19	0.07996
409	C1COCCC1(C(=O)NO)NS(=O)(=O)C2=CC=C(C=C2)OC3=CC=C(C=C3)F	2.27	0.145
410	CC1=CC(=CC(=C1OC2=C3CCCC3=C(C=C2)O)C)NC(=O)C(=O)O	0	0.0126
411	C[C@H](C(=O)O)OC1=CC(=C(C=C1)CNC(=O)C2=C(N=CC=C2)OC3=CC4=C(C=C3)OCO4)F	0	0.0414
412	COC1=C(C=CC(=C1)/C=C/C(=O)CC(=O)/C=C/C2=CC(=C(C=C2)O)OC)O	297	0
413	CCNC1=NC(=NC(=N1)Cl)NC(C)(C)C#N	3.16	0.3155
414	C1CC1(C(=O)NC2=C(C=C(C=C2)Cl)Cl)C(=O)O	0.34	0.984
415	C[C@H]1C[C@@H](C(=O)[C@@H](C1)[C@@H](CC2CC(=O)NC(=O)C2)O)C	1.74	0.629
416	C[C@H]1C[C@@H]2[C@H]([C@H]([C@]3(O2)CC[C@H]4[C@@H]5CC=C6C[C@H](CC[C@@]6([C@H]5CC4=C3C)C)O)C)NC1	29.4	0.0741
417	C1CNP(=O)(OC1)N(CCCl)CCCl.O	0	0.772
418	CC[C@H]1C(=O)N(CC(=O)N([C@H](C(=O)N[C@H](C(=O)N([C@H](C(=O)N[C@H](C(=O)N[C@@H](C(=O)N([C@H](C(=O)N([C@H](C(=O)N([C@H](C(=O)N([C@H](C(=O)N1)[C@@H]([C@H](C)C/C=C/C)O)C)C(C)C)C)CC(C)C)C)CC(C)C)C)C)C)CC(C)C)C)C(C)C)CC(C)C)C)C	8.59	0
419	CC1(C(C1C(=O)OC(C#N)C2=CC(=C(C=C2)F)OC3=CC=CC=C3)C=C(Cl)Cl)C	23.8	0
420	CCNC(=O)NC(=O)/C(=N/OC)/C#N	32.8	0.437
421	CC(C1CC1)C(CN2C=NC=N2)(C3=CC=C(C=C3)Cl)O	1.54	0.1086
422	CC1=CC(=NC(=N1)NC2=CC=CC=C2)C3CC3	37.77	0.00214
423	CC(=O)[C@]1(CC[C@@H]2[C@@]1(CC[C@H]3[C@H]2C=C(C4=CC(=O)[C@@H]5C[C@@H]5[C@]34C)Cl)C)OC(=O)C	4.46	0.0584
424	C1CC1NC2=NC(=NC(=N2)N)N	0	0.9352
425	C1=CN(C(=O)N=C1N)[C@H]2[C@H]([C@@H]([C@H](O2)CO)O)O.Cl	16.8	0.96
426	C1=CC=C2C(=C1)C(=CN2)CCN(CCO)CC3=CC=C(C=C3)/C=C/C(=O)NO	23.62	0.23
427	CN(C)NC(=O)CCC(=O)O	2.29	0.939
428	C1=CC(=CC=C1N)S(=O)(=O)C2=CC=C(C=C2)N	0	0.295
429	CC(C)(C)C1=CC(=CC(=C1O)C(C)(C)C)/C=C\2/C(=O)N=C(S2)N.CS(=O)(=O)O	0	0.00678
430	CN1CN(C(=S)SC1)C	12.42	0.8914
431	C1=CC(=CC=C1C(C2=CC=C(C=C2)Cl)C(Cl)(Cl)Cl)Cl	12.5	0
432	CCCCCCCCCC	0.77	0.06697
433	CCN(CC)C(=O)C1=CC=CC(=C1)C	3.8	0.3559
434	CCNC1=NC(=NC(=N1)N)Cl	0	0.4588
435	CC[N+](CC)(CC1=CC=CC=C1)CC(=O)NC2=C(C=CC=C2C)C.C1=CC=C2C(=C1)C(=O)N=S2(=O)[O-]	0	0.488
436	CNCCCN1C2=CC=CC=C2CCC3=CC=CC=C31	29.98	0.18
437	C[C@@H]1C[C@H]2[C@@H]3CCC4=CC(=O)C=C[C@@]4([C@]3([C@H](C[C@@]2([C@]1(C(=O)CO)O)C)O)F)C	1.79	0.32
438	C[C@@H]1C[C@H]2[C@@H]3CCC4=CC(=O)C=C[C@@]4([C@]3([C@H](C[C@@]2([C@]1(C(=O)COP(=O)([O-])[O-])O)C)O)F)C.[Na+].[Na+]	9.63	0.0956
439	CC(C)NC[C@H](COC1=CC=CC2=CC=CC=C21)O	8.96	0.16
440	CN1CC[C@@]23CCCC[C@@H]2[C@@H]1CC4=C3C=C(C=C4)OC	52.64	0.45
441	CCCCC(CC)COC(=O)C1=CC=CC=C1C(=O)OCC(CC)CCCC	2.65	0
442	C=CCOC(=O)C1=CC=CC=C1C(=O)OCC=C	8.22	0.9621
443	CN1C(=O)CN=C(C2=C1C=CC(=C2)Cl)C3=CC=CC=C3	2.18	0.013
444	CCOP(=S)(OCC)OC1=NC(=NC(=C1)C)C(C)C	30.5	0.0388
445	CCOP(=O)(OCC)OC1=NC(=NC(=C1)C)C(C)C	34.62	0.3269
446	C1=CC=C2C(=C1)C3=CC=CC=C3O2	8.3	0
447	CCCCOC(=O)C1=CC=CC=C1C(=O)OCCCC	42.5	0.028
448	CCCCOC(=O)CCCCC(=O)OCCCC	14.03	0.5872
449	CCCCOC(=O)CCCCCCCCC(=O)OCCCC	134	0
450	COC1=C(C=CC(=C1C(=O)O)Cl)Cl	0.65	0.1802
451	C(F)(F)(Cl)Cl	0.25	0.773
452	C(Cl)Cl	13.72	0.7057
453	C1=CC(=C(C=C1Cl)CC2=C(C=CC(=C2)Cl)O)O	13.2	0.0045
454	CC(C(=O)O)OC1=C(C=C(C=C1)Cl)Cl	2.23	0.00853
455	COP(=O)(OC)OC=C(Cl)Cl	86.4	0
456	C1=CC=C(C(=C1)CC(=O)O)NC2=C(C=CC=C2Cl)Cl	65.42	0.005
457	C1=CC=C(C(=C1)CC(=O)[O-])NC2=C(C=CC=C2Cl)Cl.[Na+]	38.84	0.00413
458	CCOC1=NC(=CC2=NC(=NN21)S(=O)(=O)NC3=C(C=CC=C3Cl)Cl)F	3.44	0.00648
459	C1=CC(=CC=C1C(C2=CC=C(C=C2)Cl)(C(Cl)(Cl)Cl)O)Cl	27.8	0
460	C/C(=C\C(=O)N(C)C)/OP(=O)(OC)OC	1.89	0.8457
461	C1C[C@@H](O[C@@H]1CO)N2C=NC3=C2N=CNC3=O	0	0.951
462	CCCCCCCCCC[N+](C)(C)CCCCCCCCCC.[Cl-]	18.65	0
463	C1[C@@H]2[C@H]3[C@@H]([C@H]1[C@H]4[C@@H]2O4)[C@]5(C(=C([C@@]3(C5(Cl)Cl)Cl)Cl)Cl)Cl	4.26	0.00938
464	CCOC(=O)C1=CC=CC=C1C(=O)OCC	42.5	0.19
465	C(CNCCN)N	2	0.9678
466	CC/C(=C(/CC)\C1=CC=C(C=C1)O)/C2=CC=C(C=C2)O	39.5	0.00935
467	CC1COC(O1)(CN2C=NC=N2)C3=C(C=C(C=C3)OC4=CC=C(C=C4)Cl)Cl	30.6	0.0115
468	CN1C(=CC(=[N+]1C)C2=CC=CC=C2)C3=CC=CC=C3.COS(=O)(=O)[O-]	0	0.8513
469	C1=CC(=C(C(=C1)F)C(=O)NC(=O)NC2=CC=C(C=C2)Cl)F	0	0.0308
470	C1=CC(=C(C=C1C2=C(C=C(C=C2)F)F)C(=O)O)O	3.04	0.0016
471	C[C@@H]1[C@H]([C@H](C[C@@H](O1)O[C@@H]2[C@H](O[C@H](C[C@@H]2O)O[C@@H]3[C@H](O[C@H](C[C@@H]3O)O[C@H]4CC[C@]5([C@@H](C4)CC[C@@H]6[C@@H]5C[C@H]([C@]7([C@@]6(CC[C@@H]7C8=CC(=O)OC8)O)C)O)C)C)C)O)O	0	0.7
472	CCCCCCOC(=O)C1=CC=CC=C1C(=O)OCCCCCC	27.7	0
473	CC(C)COC(=O)C1=CC=CC=C1C(=O)OCC(C)C	345	0.00044
474	CC(=O)O[C@@H]1[C@@H](SC2=CC=CC=C2N(C1=O)CCN(C)C)C3=CC=C(C=C3)OC.Cl	23.48	0.22
475	CC1=CSC(=C1N(C(C)COC)C(=O)CCl)C	19.92	0.2318
476	CNC(=O)CSP(=S)(OC)OC	3.68	0.9649
477	COC1=C(C=C(C=C1)/C(=C/C(=O)N2CCOCC2)/C3=CC=C(C=C3)Cl)OC	20.3	0.09428
478	COC(=O)CCCC(=O)OC	46.3	0.6989
479	COC(=O)C1=CC=CC=C1C(=O)OC	22.26	0.656
480	COC(=O)CCC(=O)OC	364.4	0.9999
481	C[As](=O)(C)O	0.2	0.9058
482	CC(C)(C)C(/C(=C\C1=C(C=C(C=C1)Cl)Cl)/N2C=NC=N2)O	2.59	0.01947
483	CCCCCCCCOC(=O)C1=CC=CC=C1C(=O)OCCCCCCCC	0	0.0233
484	CCC(C)C1=C(C(=CC(=C1)[N+](=O)[O-])[N+](=O)[O-])O	0	0.00043
485	CCCCCOC(=O)C1=CC=CC=C1C(=O)OCCCCC	301	0.0986
486	CN(C)C(=O)C(C1=CC=CC=C1)C2=CC=CC=C2	0	0.301
487	CN(C)CCOC(C1=CC=CC=C1)C2=CC=CC=C2	5.84	0.22
488	CN(C)CCOC(C1=CC=CC=C1)C2=CC=CC=C2.Cl	0	0.4131
489	C1=CC=C(C=C1)NC2=CC=CC=C2	64.57	0.00388
490	CCCOC(=O)C1=CN=C(C=C1)C(=O)OCCC	592	0.865
492	C1C[N+]2=CC=CC=C2C3=CC=CC=[N+]31.O.[Br-].[Br-]	0	0.967
493	CC(C)N(CCC(C1=CC=CC=C1)(C2=CC=CC=N2)C(=O)N)C(C)C	0.46	0.16
494	CCOP(=S)(OCC)SCCSCC	412	0
495	CC(C)CC1=C(C(=NC(=C1C(=O)SC)C(F)(F)F)C(F)F)C(=O)SC	13.25	0
496	CN(C)C(=O)NC1=CC(=C(C=C1)Cl)Cl	12.15	0.1615
497	CC[C@]12CC[C@H]3[C@H]([C@@H]1CC[C@]2(C#C)O)CCC4=CC(=O)CC[C@H]34	10.445	0.03805
498	CCCCCCCCCCCC[N+](C)(C)C.[Cl-]	16.2	0.0364
499	CN(CCC1=CC=C(C=C1)NS(=O)(=O)C)CCOC2=CC=C(C=C2)NS(=O)(=O)C	1.9	0.47
500	C1CN(CCC1N2C3=C(C=C(C=C3)Cl)NC2=O)CCCN4C5=CC=CC=C5NC4=O	19.08	0.082
501	CN(C)CC/C=C/1\C2=CC=CC=C2COC3=CC=CC=C31	13	0.2
502	C1=CC(=CC=C1COC(CN2C=CN=C2)C3=C(C=C(C=C3)Cl)Cl)Cl.[N+](=O)(O)[O-]	6.02	0.00553
503	CN1CCN(CC1)C2=CC=CC=C2/C=C\3/C(=O)N(CCS3)C4=CC(=C(C=C4)Cl)Cl	21.1	0.0329
504	CC[C@H](C)[C@@H]1[C@H](C=C[C@@]2(O1)C[C@@H]3C[C@H](O2)C/C=C(/[C@H]([C@H](/C=C/C=C/4\CO[C@H]5[C@@]4([C@@H](C=C([C@H]5O)C)C(=O)O3)O)C)O[C@H]6C[C@@H]([C@H]([C@@H](O6)C)O[C@H]7C[C@@H]([C@H]([C@@H](O7)C)NC)OC)OC)\C)C.C1=CC=C(C=C1)C(=O)O	0	0.00138
505	CN([C@H]1CC[C@@]2(CCCO2)C[C@@H]1N3CCCC3)C(=O)CC4=C5C=COC5=CC=C4	3.36	0.263
506	C1C2C(COS(=O)O1)C3(C(=C(C2(C3(Cl)Cl)Cl)Cl)Cl)Cl	4.98	0.11
507	C1CC2C(C(C1O2)C(=O)O)C(=O)O	0	0.867
508	C1[C@@H]2[C@@H]3[C@H]([C@H]1[C@H]4[C@@H]2O4)[C@@]5(C(=C([C@]3(C5(Cl)Cl)Cl)Cl)Cl)Cl	0	0.00642
509	C1[C@@H]([C@H](C(=O)O1)CC2=CC(=CC=C2)O)CC3=CC(=CC=C3)O	139	0.0121
510	[Na+].[Na+].[O-]C1=C(Br)C2OC3C(=CC(Br)=C([O-])C=3Br)C3(OC(=O)C4C=CC=CC3=4)C=2C=C1Br	0	0.0524
511	CCOP(=S)(C1=CC=CC=C1)OC2=CC=C(C=C2)[N+](=O)[O-]	8.16	0.01016
512	C1=CC=C(C(=C1)[C@@H]2[C@@](O2)(CN3C=NC=N3)C4=CC=C(C=C4)F)Cl	0	0.0575
513	CCCN(CCC)C(=O)SCC	80.36	0
514	C[C@]12CC[C@H]3C(=CCC4=C3C=CC(=C4)O)[C@@H]1CCC2=O	9.74	0.0583
515	CC[C@@H]1[C@@]([C@@H]([C@H](C(=O)[C@@H](C[C@@]([C@@H]([C@H]([C@@H]([C@H](C(=O)O1)C)O[C@H]2C[C@@]([C@H]([C@@H](O2)C)O)(C)OC)C)O[C@H]3[C@@H]([C@H](C[C@H](O3)C)N(C)C)O)(C)O)C)C)O)(C)O	4.04	0.5653
516	CC(C)[C@@H](C1=CC=C(C=C1)Cl)C(=O)O[C@H](C#N)C2=CC(=CC=C2)OC3=CC=CC=C3	0	0
517	C[C@]12CC[C@H]3[C@H]([C@@H]1CCC2=O)CCC4=C3C=CC(=C4)O	0	0.0308
518	CCN(CC(=C)C)C1=C(C=C(C=C1[N+](=O)[O-])C(F)(F)F)[N+](=O)[O-]	3.03	0
519	CCOC1=NC(=NC(=N1)NC(=O)NS(=O)(=O)C2=CC=CC=C2C(=O)OC)NC	1.08	0.01566
520	CCO	19.98	0.9338
521	CCOP(=S)(OCC)SCSP(=S)(OCC)OCC	10.41	0
522	CCOC1C(C2=C(O1)C=CC(=C2)OS(=O)(=O)C)(C)C	17.64	0.1313
523	CCCSP(=O)(OCC)SCCC	20.95	0.09346
524	CCOC1=CC2=C(C=C1)NC(C=C2C)(C)C	15.16	0.01069
525	CCOC(=O)C(=C(C1=CC=CC=C1)C2=CC=CC=C2)C#N	161.3	0.00701
526	CCN(C1CCCCC1)C(=O)SCC	34.48	0
527	CCOC(C)(C)C	3.03	0.7626
528	CCC1=CC=CC=C1	10.12	0.1676
529	CCOC(=O)C1=CC=C(C=C1)O	57.24	0.1057
530	CCC1=C2C(=CC=C1)C3=C(N2)C(OCC3)(CC)CC(=O)O	7.9	0.008
531	CCOC1=C(C=CC(=C1)C(C)(C)C)C2COC(=N2)C3=C(C=CC=C3F)F	18.48	0
532	CCOC1=NC(=NS1)C(Cl)(Cl)Cl	127	0
533	COC1=C(C=CC(=C1)CC=C)O	103.6	0.1922
534	C1=CC(=C(C(=C1C(=O)C2=CC(=C(C(=C2)O)O)O)O)O)O	28.1	0
535	CC1=C2CC[C@@H](C(=O)N2C3=CC=CC=C13)CC4=C(NC=N4)C.Cl	7.56	0.0309
536	C1=C(N=C(S1)N=C(N)N)CSCC/C(=N/S(=O)(=O)N)/N	0	0.84
537	CC1(C(=O)N(C(=O)O1)NC2=CC=CC=C2)C3=CC=C(C=C3)OC4=CC=CC=C4	16.4	0.0097
538	CCN(CC1=CC(=CC=C1)S(=O)(=O)[O-])C2=CC=C(C=C2)C(=C3C=CC(=[N+](CC)CC4=CC(=CC=C4)S(=O)(=O)[O-])C=C3)C5=C(C=C(C=C5)O)S(=O)(=O)[O-].[Na+].[Na+]	0	0.0151
539	C1=CC(=CC=C1N=NC2=C(C=CC3=C2C=CC(=C3)S(=O)(=O)[O-])O)S(=O)(=O)[O-].[Na+].[Na+]	18.9	0
540	CCOC(=O)C1=C(NC(=C(C1C2=C(C(=CC=C2)Cl)Cl)C(=O)OC)C)C	0	0.07
541	CCOP(=O)(NC(C)C)OC1=CC(=C(C=C1)SC)C	62.11	0.04138
542	C1=CC=C(C(=C1)C(C2=CC=C(C=C2)Cl)(C3=CN=CN=C3)O)Cl	3.79	0.03671
543	CC1(CCCCC1)C(=O)NC2=C(C(=C(C=C2)O)Cl)Cl	35.27	0.05719
544	CC1=C(C=CC(=C1)OP(=S)(OC)OC)[N+](=O)[O-]	10.02	0
545	CC(C)OC(=O)C(C)(C)OC1=CC=C(C=C1)C(=O)C2=CC=C(C=C2)Cl	563	0.00815
546	CC(C1=CC(=CC=C1)OC2=CC=CC=C2)C(=O)O	11.29	0.02
547	CCOC(=O)[C@H](C)OC1=CC=C(C=C1)OC2=NC3=C(O2)C=C(C=C3)Cl	723	0.00537
548	CCOC(=O)C(C)OC1=CC=C(C=C1)OC2=NC3=C(O2)C=C(C=C3)Cl	54.93	0
549	CCOC(=O)[C@@H](C)OC1=CC=C(C=C1)OC2=NC3=C(O2)C=C(C=C3)Cl	519	0.00635
550	CCOC(=O)NCCOC1=CC=C(C=C1)OC2=CC=CC=C2	23.1	0.00327
551	CC1(C(C1(C)C)C(=O)OC(C#N)C2=CC(=CC=C2)OC3=CC=CC=C3)C	19.7	0.00458
552	CC1=NN(C(=C1/C=N/OCC2=CC=C(C=C2)C(=O)OC(C)(C)C)OC3=CC=CC=C3)C	16.8	0.0046
553	CC1=C(C=CC(=C1)OP(=S)(OC)OC)SC	87.2	0
554	CN(C)C(=O)NC1=CC=CC=C1	2.89	0.564
555	C[C@]12CC[C@H]3[C@H]([C@@H]1CC[C@@H]2C(=O)NC(C)(C)C)CC[C@@H]4[C@@]3(C=CC(=O)N4)C	4.5	0.095
556	C1=C(C=C(C(=C1Cl)N2C(=C(C(=N2)C#N)S(=O)C(F)(F)F)N)Cl)C(F)(F)F	1.37	0.0461
557	CC1=C2CCC(C(=O)N2C3=CC=CC=C13)CC4=C(NC=N4)C	2.56	0.016
558	CCCCOC(=O)C(C)OC1=CC=C(C=C1)OC2=NC=C(C=C2)C(F)(F)F	401	0.00862
559	CCCCOC(=O)[C@@H](C)OC1=CC=C(C=C1)OC2=NC=C(C=C2)C(F)(F)F	234.4	0
560	C1=C(C=NC(=C1Cl)NC2=C(C=C(C(=C2[N+](=O)[O-])Cl)C(F)(F)F)[N+](=O)[O-])C(F)(F)F	24.76	0.00436
561	C1=CC(=C(C=C1F)F)C(CN2C=NC=N2)(CN3C=NC=N3)O	1.83	0.7109
562	C1=CC(=C2C(=C1)OC(O2)(F)F)C3=CNC=C3C#N	37.05	0.00358
563	CC(C)N(C1=CC=C(C=C1)F)C(=O)COC2=NN=C(S2)C(F)(F)F	29	0.1375
564	CCOC(=O)COC1=C(C=C(C(=C1)N2C(=O)C(=C(C=N2)C(F)(F)F)C)F)Cl	375	0.769
565	CCOC(=O)C1=C2CN(C(=O)C3=C(N2C=N1)C=CC(=C3)F)C	6.23	0.58
566	CCN(CC1=C(C=CC=C1Cl)F)C2=C(C=C(C=C2[N+](=O)[O-])C(F)(F)F)[N+](=O)[O-]	0	0
567	CC1=NC2=NC(=NN2C=C1)S(=O)(=O)NC3=C(C=CC=C3F)F	7.52	0.01727
568	C#CCN1C(=O)COC2=CC(=C(C=C21)N3C(=O)C4=C(C3=O)CCCC4)F	8.34	0.02807
569	CN1C(=O)CN=C(C2=C1C=CC(=C2)[N+](=O)[O-])C3=CC=CC=C3F	1.09	0.25
570	CN(C)C(=O)NC1=CC=CC(=C1)C(F)(F)F	10.06	0.2589
571	C1=CC=C2C(=C1)C3=CC=CC4=C3C2=CC=C4	8.06	0.01409
572	C1C2=CC=CC=C2C3=CC=CC=C31	12.08	0.01567
573	C1=CC=C2C(=C1)C(=O)OC23C4=C(C=C(C=C4)O)OC5=C3C=CC(=C5)O	0	0.151
574	CO/N=C(\C1=CC=CC=C1OC2=C(C(=NC=N2)OC3=CC=CC=C3Cl)F)/C4=NOCCO4	16.35	0.0362
575	CNCCC(C1=CC=CC=C1)OC2=CC=C(C=C2)C(F)(F)F	1	0.13
576	C1CN(CCN1CCCN2C3=CC=CC=C3SC4=C2C=C(C=C4)C(F)(F)F)CCO	7.4	0.04
577	C(C(=O)O)OC1=NC(=C(C(=C1Cl)N)Cl)F	1.79	0.09194
578	CCCCCCC(C)OC(=O)COC1=NC(=C(C(=C1Cl)N)Cl)F	9.92	0
579	C[Si](CN1C=NC=N1)(C2=CC=C(C=C2)F)C3=CC=C(C=C3)F	6.96	0.02893
580	CC(C)C(=O)NC1=CC(=C(C=C1)[N+](=O)[O-])C(F)(F)F	30.38	0.03758
581	CC(C)OC1=CC=CC(=C1)NC(=O)C2=CC=CC=C2C(F)(F)F	14.17	0.01882
582	C1=CC(=CC=C1C(=O)N[C@@H](CCC(=O)O)C(=O)O)NCC2=CN=C3C(=N2)C(=O)NC(=N3)N	0	0.0436
583	CS(=O)(=O)NC(=O)C1=C(C=CC(=C1)OC2=C(C=C(C=C2)C(F)(F)F)Cl)[N+](=O)[O-]	0	0.017
584	CN(C)C(=O)C1=C(C=C(C=C1)NC=O)S(=O)(=O)NC(=O)NC2=NC(=CC(=N2)OC)OC	0	0.0649
585	C1=CC=C(C=C1)NC(=O)NC2=CC(=NC=C2)Cl	26.87	0.02755
586	CNC(=O)OC1=CC=CC(=C1)N=CN(C)C.Cl	13.72	0.8853
587	CCC(C)SP(=O)(N1CCSC1=O)OCC	0	0.4599
588	CC/C(=C\C(=N/O)\C(=O)N)/C(C)[N+](=O)[O-]	21.2	0
589	C[C@]12CC[C@H]3[C@H]([C@@H]1CC[C@@H]2O)[C@@H](CC4=C3C=CC(=C4)O)CCCCCCCCCS(=O)CCCC(C(F)(F)F)(F)F	2.4	0.00264
590	C1=COC=C1	2.1	0.6212
591	C1=COC(=C1)CNC2=CC(=C(C=C2C(=O)O)S(=O)(=O)N)Cl	0	0.012
592	CCCOC(=O)C1=CC(=C(C(=C1)O)O)O	49.7	0.0258
593	CC1=CC(=C(C=C1)C)OCCCC(C)(C)C(=O)O	52.18	0.03
594	C1=CC(=CC=C1C2=COC3=CC(=CC(=C3C2=O)O)O)O	18.69	0.02426
595	CN(C)C1=CC=C(C=C1)C(=C2C=CC(=[N+](C)C)C=C2)C3=CC=C(C=C3)N(C)C.[Cl-]	8.32	0.01384
596	CC(=CCC/C(=C/COC(=O)C)/C)C	823	0.192
597	C[C@@]12[C@H](C=C[C@@]3([C@@H]1[C@@H]([C@]45[C@H]3CC[C@](C4)(C(=C)C5)O)C(=O)O)OC2=O)O	0	0.24
598	CCC1=C(CN(C1=O)C(=O)NCCC2=CC=C(C=C2)S(=O)(=O)NC(=O)NC3CCC(CC3)C)C	3.82	0.005
599	CC1=CN=C(C=N1)C(=O)NCCC2=CC=C(C=C2)S(=O)(=O)NC(=O)NC3CCCCC3	1.6	0.02
600	COC1=C(C=C(C=C1)Cl)C(=O)NCCC2=CC=C(C=C2)S(=O)(=O)NC(=O)NC3CCCCC3	6.62	0.021
601	C[N+](C)(C)CC1CO1.[Cl-]	0	0.518
602	CN1[C@@H]2CCC[C@H]1CC(C2)NC(=O)C3=NN(C4=CC=CC=C43)C	7.01	0.35
603	C1CN(CCC1(C2=CC=C(C=C2)Cl)O)CCCC(=O)C3=CC=C(C=C3)F	5.06	0.1784
604	CN1C(=C(C(=N1)Cl)C(=O)OC)S(=O)(=O)NC(=O)NC2=NC(=CC(=N2)OC)OC	0	0.00946
605	CC(C(=O)OC)OC1=CC=C(C=C1)OC2=C(C=C(C=N2)C(F)(F)F)Cl	467	0.00819
606	CCC1(C(=O)NC(=O)NC1=O)C2=CCCCCC2	29	0.62
607	C1=CC(C2C1C3(C(=C(C2(C3(Cl)Cl)Cl)Cl)Cl)Cl)Cl	4.57	0.04333
608	[C@@H]12[C@@H]([C@H]([C@@H]3[C@H]1O3)Cl)[C@]4(C(=C([C@@]2(C4(Cl)Cl)Cl)Cl)Cl)Cl	0	0.01068
609	C1(=C(C(C(=C1Cl)Cl)(Cl)Cl)Cl)Cl	0	0
610	C1=C(C(=C(C(=C1Cl)Cl)CC2=C(C(=CC(=C2Cl)Cl)Cl)O)O)Cl	0	0
611	CCCCC(CN1C=NC=N1)(C2=C(C=C(C=C2)Cl)Cl)O	16.22	0.041
612	C(CCC(=O)NN)CC(=O)NN	0.6	0.9601
613	CN1C(=NC(=O)N(C1=O)C2CCCCC2)N(C)C	6.36	0.613
614	CC1(C(=O)NC(=O)N(C1=O)C)C2=CCCCC2	0	0.53
615	CCCCCCOC(=O)C1=CC=CC=C1O	191.4	0
616	C[C@H]1[C@@H](SC(=O)N1C(=O)NC2CCCCC2)C3=CC=C(C=C3)Cl	110.4	0
617	CC1(CN=C(NC1)NN=C(/C=C/C2=CC=C(C=C2)C(F)(F)F)/C=C/C3=CC=C(C=C3)C(F)(F)F)C	4.38	0
618	C1NC2=CC(=C(C=C2S(=O)(=O)N1)S(=O)(=O)N)Cl	0	0.274
619	C[C@]12CCC(=O)C=C1CC[C@@H]3[C@@H]2[C@H](C[C@]4([C@H]3CC[C@@]4(C(=O)CO)O)C)O	8.57	0.2
620	CC(C)(C(=O)NC1=CC(=C(C=C1)[N+](=O)[O-])C(F)(F)F)O	0	0.166
621	CC(C)CC1=CC=C(C=C1)C(C)C(=O)O	10.12	0.01
622	CCC(C)OC(=O)N1CCCCC1CCO	12.56	0.2842
623	CC(C)[C@@H](C(=O)N[C@H]1CC2=CC=CC=C2[C@H]3CCC[C@H](N3C1=O)C(=O)O)SC(=O)C	5.55	0.319
624	C=CCOC(CN1C=CN=C1)C2=C(C=C(C=C2)Cl)Cl	1.03	0.02956
625	CC(C)C1(C(=O)NC(=N1)C2=C(C=C(C=N2)COC)C(=O)O)C	0	0.4548
626	CC1=CC(=C(N=C1)C2=NC(C(=O)N2)(C)C(C)C)C(=O)O	0	0.5468
627	CC(C)C1(C(=O)NC(=N1)C2=C(C=CC=N2)C(=O)O)C	0.39	0.9231
628	CC(C)C1(C(=O)NC(=N1)C2=NC3=CC=CC=C3C=C2C(=O)O)C	2.46	0.1513
629	CCC1=CC(=C(N=C1)C2=NC(C(=O)N2)(C)C(C)C)C(=O)O	2.35	0.2895
630	C1CN(/C(=N/[N+](=O)[O-])/N1)CC2=CN=C(C=C2)Cl	2.81	0.6559
631	CN(C)CCCN1C2=CC=CC=C2CCC3=CC=CC=C31	35.05	0.1
632	CCC1=C(C=C2CC(CC2=C1)NC[C@@H](C3=C4C=CC(=O)NC4=C(C=C3)O)O)CC	5.05	0.05
633	CC(C)(C)NC(=O)[C@@H]1CN(CCN1C[C@H](C[C@@H](CC2=CC=CC=C2)C(=O)N[C@@H]3[C@@H](CC4=CC=CC=C34)O)O)CC5=CN=CC=C5	10.23	0.3
634	COC(=O)[C@]12CC3=C(C1=NN(CO2)C(=O)N(C4=CC=C(C=C4)OC(F)(F)F)C(=O)OC)C=CC(=C3)Cl	31.36	0
635	C1[C@H]([C@H](CN1C(=O)[C@@H]([C@H](CC2=CC=CC=C2)NC(=O)C3=CC4=C(N3)C=CC(=C4)Cl)O)O)O	2.09	0.0234
636	CC1=NC(=NC(=N1)OC)NC(=O)[N-]S(=O)(=O)C2=C(C=CC(=C2)I)C(=O)OC.[Na+]	5.69	0.00668
637	CC(C)C1CCC(C1(CN2C=NC=N2)O)CC3=CC=C(C=C3)Cl	101	0.0132
638	CCCCC1=NC2(CCCC2)C(=O)N1CC3=CC=C(C=C3)C4=CC=CC=C4C5=NNN=N5	13.63	0.1
639	CCOP(=S)(OCC)OC1=NN(C(=N1)Cl)C(C)C	19.53	0.06539
640	C/C=C/C1=CC(=C(C=C1)O)OC	71.78	0
641	CCOP(=S)(NC(C)C)OC1=CC=CC=C1C(=O)OC(C)C	158	0.0105
642	C1=CN=CC=C1C(=O)NN	1.11	1
643	CCCN(CCC)C1=C(C=C(C=C1[N+](=O)[O-])C(C)C)[N+](=O)[O-]	12.5	0
644	CC(C)O	1.1	0.9214
645	CC(C)NCC(C1=CC(=C(C=C1)O)O)O.Cl	0	0.609
646	CC(C)C1=CC=C(C=C1)NC(=O)N(C)C	0	0.258
647	CCC(C)(CC)C1=NOC(=C1)NC(=O)C2=C(C=CC=C2OC)OC	17.7	0.0718
648	CS(=O)(=O)C1=C(C=CC(=C1)C(F)(F)F)C(=O)C2=C(ON=C2)C3CC3	20.42	0.01655
649	CC1=C(C(C(=C(N1)C)C(=O)OC(C)C)C2=CC=CC3=NON=C32)C(=O)OC	18	0.04
650	C1CN(CCC1C(=O)C2=CC=C(C=C2)F)CCN3C(=O)C4=CC=CC=C4NC3=O	52.96	0.055
651	CC(=O)N1CCN(CC1)C2=CC=C(C=C2)OC[C@H]3CO[C@](O3)(CN4C=CN=C4)C5=C(C=C(C=C5)Cl)Cl	55	0.062
652	CC(C1=CC(=CC=C1)C(=O)C2=CC=CC=C2)C(=O)O	4.67	0.008
653	C1CC1[C@@]2(C3=CC=CC=C3NC(=O)N2)C#CC4=CC=CC=N4	0	1
654	CC(CCC1=CC=CC=C1)NCC(C2=CC(=C(C=C2)O)C(=O)N)O	5.84	0.5
655	CCOC(=O)C(C)OC(=O)C1=C(C=CC(=C1)OC2=C(C=C(C=C2)C(F)(F)F)Cl)[N+](=O)[O-]	1.28	0
656	CCCCCCCCCCCCN1CCCCCC1=O	9.8	0.00275
657	CCCCCCCCCCCCOC(=O)C1=CC(=C(C(=C1)O)O)O	0	0
658	CN(C)C1=CC=C(C=C1)C(C2=CC=CC=C2)C3=CC=C(C=C3)N(C)C	0	0
659	C[C@H]1COC2=C3N1C=C(C(=O)C3=CC(=C2N4CCN(CC4)C)F)C(=O)O	3	0.75
661	CNC[C@@H](CC12CCC(C3=CC=CC=C31)C4=CC=CC=C24)O	3.04	0.19
662	C1=C(C=C(C(=C1I)OC2=CC(=C(C(=C2)I)O)I)I)C[C@@H](C(=O)O)N	0	0
663	CCN(CC)CC(=O)NC1=C(C=CC=C1C)C	5.06	0.296
665	CN(C(=O)NC1=CC(=C(C=C1)Cl)Cl)OC	33.05	0.1051
666	CCOC(=O)N1CCC(=C2C3=C(CCC4=C2N=CC=C4)C=C(C=C3)Cl)CC1	33.9	0.00968
667	C1=CC=C(C(=C1)C2=NC(C(=O)NC3=C2C=C(C=C3)Cl)O)Cl	0.74	0.09
668	CC(C)N1CCC(CC1)N(C2=CC=C(C=C2)Cl)C(=O)CC3=CC=CC=C3	34.66	0.15
669	CC[C@H](C)C(=O)O[C@H]1C[C@H](C=C2[C@H]1[C@H]([C@H](C=C2)C)CC[C@@H]3C[C@H](CC(=O)O3)O)C	0	0.01429
670	CN1C(=NC(=N1)CO)NCCCOC2=CC=CC(=C2)CN3CCCCC3	11	0.96
671	CCOC(=O)CC(C(=O)OCC)SP(=O)(OC)OC	55.9	0.538
672	CCOC(=O)CC(C(=O)OCC)SP(=S)(OC)OC	368	0.145
673	CNCCCC12CCC(C3=CC=CC=C31)C4=CC=CC=C24	0.72	0.11
674	CCCCC(CC)COC(=O)C1=CC=CC=C1C(=O)O	0	0.352
675	CC(=O)NCCC1=CNC2=C1C=C(C=C2)OC	0	0.498
676	CC1=C[C@@H]2[C@H](CC[C@]3([C@H]2CC(=C)[C@@]3(C(=O)C)OC(=O)C)C)[C@@]4(C1=CC(=O)CC4)C	41.4	0.0232
677	CC#CC1=NC(=NC(=C1)C)NC2=CC=CC=C2	12.42	0.03419
678	CC[C@H](C1=CC=C(C=C1)O)[C@@H](CC)C2=CC=C(C=C2)O	14	0.00772
679	COC1=CC(=NC(=N1)NC(=O)NS(=O)(=O)C2=C(C=CC(=C2)CNS(=O)(=O)C)C(=O)OC)OC	5.45	0
680	CS(=O)(=O)C1=CC(=C(C=C1)C(=O)C2C(=O)CCCC2=O)[N+](=O)[O-]	0.35	0.3548
681	CC1=C(C(=CC=C1)C)N(C(C)C(=O)OC)C(=O)COC	1.58	0.7306
682	CC1=NN=C(C(=O)N1N)C2=CC=CC=C2	0	0.693
683	CCC(=O)C(CC(C)N(C)C)(C1=CC=CC=C1)C2=CC=CC=C2	0	0.21
684	COP(=O)(N)SC	0	0.396
685	CO	0.89	0.9449
686	C1N2CN3CN1CN(C2)C3	0	0.352
687	COC1=NN(C(=O)S1)CSP(=S)(OC)OC	3.92	0.2685
688	CCC#CC(C)C1(C(=O)NC(=O)N(C1=O)C)CC=C	0	0.27
689	CC(=NOC(=O)NC)SC	2.05	0.716
690	CN(CC1=CN=C2C(=N1)C(=NC(=N2)N)N)C3=CC=C(C=C3)C(=O)N[C@@H](CCC(=O)O)C(=O)O	0	0.432
691	COC1=CC=C(C=C1)C(C2=CC=C(C=C2)OC)C(Cl)(Cl)Cl	12.5	0.0171
692	CC1=CC(=CC(=C1)C(=O)N(C(C)(C)C)NC(=O)C2=C(C(=CC=C2)OC)C)C	16.2	0.06119
693	COC(=O)C1=CC=CC=C1N	246	0.224
694	CC1=CC(=C(C(=C1C(=O)OC)O)C)O	268	0.0335
695	CCCCCCCCCCCC(=O)OC	445.2	0.03637
696	CCC(=O)C	50.86	0.8744
697	COP(=S)(OC)OC1=CC=C(C=C1)[N+](=O)[O-]	14.19	0.02832
698	CN(C)C1=CC=C(C=C1)N=NC2=CC=CC=C2C(=O)O	11.1	0.0304
699	COC(=O)C1=CC=CC=C1O	817	0.107
700	CC(C)(C)OC	4.64	0.905
701	CN(C)C1=CC2=C(C=C1)N=C3C=CC(=[N+](C)C)C=C3S2.[Cl-]	13.9	0.38
702	COC1=C(C=C(C=C1)CC=C)OC	26.56	0.1416
703	COC(=O)C1=CC=C(C=C1)O	107.5	0.07056
704	COC(=O)C(C1CCCCN1)C2=CC=CC=C2	2.51	0.85
705	C[C@H]1C[C@H]2[C@@H]3CC[C@@]([C@]3(C[C@@H]([C@@H]2[C@@]4(C1=CC(=O)C=C4)C)O)C)(C(=O)CO)O	5.45	0.23
706	CCN(CC)CCNC(=O)C1=CC(=C(C=C1OC)N)Cl	2.57	0.6
707	CCC1=CC=CC(=C1N(C(C)COC)C(=O)CCl)C	35.37	0.1773
708	CC(C)NCC(COC1=CC=C(C=C1)CCOC)O	6.23	0.883
709	CC(C)(C)C1=NN=C(N(C1=O)N)SC	1.07	0.4787
710	CC1=NC=C(N1CCO)[N+](=O)[O-]	3	0.96
711	CC1=NC(=NC(=N1)OC)NC(=O)NS(=O)(=O)C2=CC=CC=C2C(=O)OC	2.32	0.08599
712	C/C(=C\C(=O)OC)/OP(=O)(OC)OC	4.7	0.674
713	CN1CCN2C(C1)C3=CC=CC=C3CC4=CC=CC=C42	5.84	0.05
714	CC1=NC=C2N1C3=C(C=C(C=C3)Cl)C(=NC2)C4=CC=CC=C4F	12.1	0.05
715	COC1=CC(=C(C=C1)OC)C(CNC(=O)CN)O	3	0.7
716	CC#C[C@@]1(CC[C@@H]2[C@@]1(C[C@@H](C3=C4CCC(=O)C=C4CC[C@@H]23)C5=CC=C(C=C5)N(C)C)C)O	33.2	0.0167
717	CN(C)[C@H]1[C@@H]2C[C@@H]3CC4=C(C=CC(=C4C(=C3C(=O)[C@@]2(C(=C(C1=O)C(=O)N)O)O)O)O)N(C)C.Cl	0	0.276
718	C12(C3(C4(C5(C3(C(C1(C5(C2(C4(Cl)Cl)Cl)Cl)Cl)(Cl)Cl)Cl)Cl)Cl)Cl)Cl	0	0.01508
719	C1COCCN1CCNC(=O)C2=CC=C(C=C2)Cl	3	0.77
720	CCSC(=O)N1CCCCCC1	11.6	0.09714
721	C1=CC=C(C=C1)COC(=O)C2=CC=CC=C2C(=O)O	0	0.0352
722	CCCCOC(=O)C1=CC=CC=C1C(=O)O	0.74	0.2077
723	C/C(=C\C(=O)NC)/OP(=O)(OC)OC	1.49	0.898
724	CN(C(=O)NC1=CC=C(C=C1)Cl)OC	0	0.205
725	COC(=O)C1=CC=CC=C1C(=O)O	0	0.372
726	CC(C)(C1=CC=CC=C1CC[C@H](C2=CC=CC(=C2)/C=C/C3=NC4=C(C=CC(=C4)Cl)C=C3)SCC5(CC5)CC(=O)O)O	29.6	0.002
727	CN(C)C(=O)NC1=CC=C(C=C1)Cl	3.09	0.4551
728	C1=CC(=C(C=C1O)O)C2=C(C(=O)C3=C(C=C(C=C3O2)O)O)O.O	0	0
729	CN1CC[C@]23[C@@H]4[C@H]1CC5=C2C(=C(C=C5)O)O[C@H]3[C@H](C=C4)O	24	0.65
730	CC1=NC(=C(C(=N1)Cl)NC2=NCCN2)OC	3	0.93
731	CCCCC(CN1C=NC=N1)(C#N)C2=CC=C(C=C2)Cl	16.4	0.08429
732	CC1=C2COC(=O)C2=C(C(=C1OC)C/C=C(\C)/CCC(=O)O)O	14.79	0.02
733	CCC(=O)NC1=CC(=C(C=C1)Cl)Cl	11.3	0.0713
734	CC1=CC=C(C=C1)N(C)C	20.38	0.05498
735	CCN(CC)C1=CC=CC=C1	9.81	0.04287
736	CCCCCCCCCCCCN(C)C	34.2	0.00699
737	CCCCCCCCN(C)C	35.14	0.5627
738	C=CC(=O)NCNC(=O)C=C	2.95	1
739	CC(C)(C)NCC(COC1=CC=CC2=C1C[C@@H]([C@@H](C2)O)O)O	3.19	0.14
740	CCN1C=C(C(=O)C2=C1N=C(C=C2)C)C(=O)O	1.1	0.749
741	C=CCN1CC[C@]23[C@@H]4C(=O)CC[C@]2([C@H]1CC5=C3C(=C(C=C5)O)O4)O	65.03	0.559
742	C1CC1CN2CC[C@]34[C@@H]5C(=O)CC[C@]3([C@H]2CC6=C4C(=C(C=C6)O)O5)O	17.91	0.79
743	C1=CC=C2C=C(C=CC2=C1)OC(=O)C3=CC=CC=C3N	846	0.00653
744	C1=CC=C2C=CC=CC2=C1	10.39	0.0156
745	CCN(CC)C(=O)C(C)OC1=CC=CC2=CC=CC=C21	15.15	0
746	C[C@@H](C1=CC2=C(C=C1)C=C(C=C2)OC)C(=O)O	26.48	0.002
747	C1=CC=C(C=C1)CNC2=NC=NC3=C2NC=N3	0	0.138
748	CCCCN(CCO)CCO	1.12	1
749	CCCCCCCCCCCC(=O)N(C)CC(=O)O	42.07	0.00322
750	CN(C)C(=O)[C@@H]1C[C@H](CN1[C@]2(C3=C(C=CC(=C3)Cl)N(C2=O)S(=O)(=O)C4=C(C=C(C=C4)OC)OC)C5=CC=CC=C5OC)O	35.3	0.0608
751	CCNC1=CC=CC(=C1)C	13.12	0.1414
752	CCNC1=CC=CC=C1	21.8	0.214
753	CCNS(=O)(=O)C(C(C(C(C(C(C(C(F)(F)F)(F)F)(F)F)(F)F)(F)F)(F)F)(F)F)(F)F	3.48	0
754	CCCCCC	5.56	0.1931
755	CC1=C(C(C(=C(N1)C)C(=O)OCCN(C)CC2=CC=CC=C2)C3=CC(=CC=C3)[N+](=O)[O-])C(=O)OC	402	0.084
756	C1=CC(=CN=C1)C(=O)O	3.54	0.594
757	CC1=C(C(C(=C(N1)C)C(=O)OC)C2=CC=CC=C2[N+](=O)[O-])C(=O)OC	23.36	0.044
758	CC1=C(C(C(=C(N1)C#N)C(=O)OC)C2=CC(=CC=C2)[N+](=O)[O-])C(=O)OC(C)C	2160	0.013
759	CC1=C(C(C(=C(N1)C)C(=O)OCC(C)C)C2=CC=CC=C2[N+](=O)[O-])C(=O)OC	0	0.003
760	C1=CC(=NC(=C1)Cl)C(Cl)(Cl)Cl	238	0
761	CCOC(=O)C1=C(NC(=C(C1C2=CC(=CC=C2)[N+](=O)[O-])C(=O)OC)C)C	12.07	0.02
762	C1=CC=C(C=C1)[N+](=O)[O-]	8.17	0.3844
763	C1C(=O)NC(=O)N1/N=C/C2=CC=C(O2)[N+](=O)[O-]	0	0.415
764	C1=C(OC(=C1)[N+](=O)[O-])/C=N/NC(=O)N	0	0.856
765	CN1CCCC1=O	0.21	0.888
766	CCCCN(CCCC)N=O	11.12	0.2602
767	C1=CC=C(C=C1)N(C2=CC=CC=C2)N=O	8.29	0.04368
768	CCCCCCCCC	3.94	0.08128
769	C[C@@H]1CC(=O)C=C2[C@]1(C[C@@H](CC2)C(=C)C)C	172	0
770	CC(CC1=CC(=C(C=C1)O)O)C(C)CC2=CC(=C(C=C2)O)O	270	0
771	C[C@]12CC[C@H]3[C@H]([C@@H]1CC[C@]2(C#C)O)CCC4=CC(=O)CC[C@H]34	0	0.0516
772	CNC1=C(C(=O)N(N=C1)C2=CC=CC(=C2)C(F)(F)F)Cl	11.09	0.1841
773	CNCCC=C1C2=CC=CC=C2CCC3=CC=CC=C31	0	0.12
774	C1=CC(=C(C(=C1)F)C(=O)NC(=O)NC2=CC(=C(C=C2)OC(C(OC(F)(F)F)F)(F)F)Cl)F	2.87	0
775	C1=CC=C(C=C1)NC2=CC=C(C=C2)N	15.59	0.1434
776	C1=CC=C(C=C1)NC2=CC=CC3=CC=CC=C32	57.9	0.00696
777	C1=CC=C(C(=C1)C(C2=CC=C(C=C2)Cl)C(Cl)(Cl)Cl)Cl	15.3	0
778	CC1=CC=CC=C1N=NC2=CC(=C(C=C2)N)C	6.89	0.00696
779	CC1=CC=CC=C1O	27.48	0.38
780	CCCCCCCCOC1=CC(=C(C=C1)C(=O)C2=CC=CC=C2)O	807	0
781	CCCCCCCC	3.5	0.1031
782	CCCCCCCC(=O)O	5.63	0
783	CCCCCCCCN1C(=O)C=CS1	12.72	0.02822
784	CC(C)(C)CC(C)(C)C1=CC(=C(C=C1)O)N2N=C3C=CC=CC3=N2	5.87	0.0223
785	CCCCCCCCOC(=O)C1=CC(=C(C(=C1)O)O)O	230	0.0009
786	CCCCC(CC)CN1C(=O)C2C3CC(C2C1=O)C=C3	134.3	0
787	CCCCCCCC/C=C\CCCCCCCC(=O)N(C)CC(=O)O	41.7	0
788	CC1=CN=C(C(=C1OC)C)CS(=O)C2=NC3=C(N2)C=C(C=C3)OC	3.27	0.16
789	CC1=NC=CN1CC2CCC3=C(C2=O)C4=CC=CC=C4N3C	1.4	0.25
790	CC1=CC=CC=C1C(C2=CC=CC=C2)OCCN(C)C	0.72	0.175
791	CCCN(CCC)C1=C(C=C(C=C1[N+](=O)[O-])S(=O)(=O)N)[N+](=O)[O-]	20.2	0.0048
792	CC(C)OC1=C(C=C(C(=C1)N2C(=O)OC(=N2)C(C)(C)C)Cl)Cl	0	0.00364
793	CNC(=O)O/N=C(/C(=O)N(C)C)\SC	0	0.7926
794	C1=CC=C(C=C1)C2=C(OC(=N2)CCC(=O)O)C3=CC=CC=C3	4.67	0.00039
795	CC1=CC(=NC(=N1)NC(=O)NS(=O)(=O)C2=CC=CC=C2C(=O)OC3COC3)C	3.11	0.06084
796	C1=CC=C(C=C1)C2=NC(C(=O)NC3=C2C=C(C=C3)Cl)O	3.27	0.04
797	CC(C)NCC(COC1=CC=CC=C1OCC=C)O	4.28	0.19
798	CCOC1=C(C=CC(=C1)OC2=C(C=C(C=C2)C(F)(F)F)Cl)[N+](=O)[O-]	0	0.1218
799	C1=CC=C2C(=C1)C(C(=O)N2)(C3=CC=C(C=C3)O)C4=CC=C(C=C4)O	0	0.0266
800	C[C@@]1([C@H]2[C@@H]([C@H]3[C@@H](C(=O)C(=C([C@]3(C(=O)C2=C(C4=C1C=CC=C4O)O)O)O)C(=O)N)N(C)C)O)O.O.O	0	0.3982
801	C[C@@]1([C@H]2[C@@H]([C@H]3[C@@H](C(=O)C(=C([C@]3(C(=O)C2=C(C4=C1C=CC=C4O)O)O)O)C(=O)N)N(C)C)O)O.Cl	0	0.6283
802	C1=CC(=CC=C1C(C2=CC=C(C=C2)Cl)C(Cl)Cl)Cl	0	0.03115
803	C1=CC(=CC=C1C(=C(Cl)Cl)C2=CC=C(C=C2)Cl)Cl	199	0
804	CC(C)(C)[C@H]([C@@H](CC1=CC=C(C=C1)Cl)N2C=NC=N2)O	7.14	0.1538
805	CCOP(=O)(OCC)OC1=CC=C(C=C1)[N+](=O)[O-]	0	0.46
806	CCOP(=S)(OCC)OC1=CC=C(C=C1)[N+](=O)[O-]	6.65	0.04
807	CC1=CC=C(C=C1)O	39.66	0.3259
808	CC1=C(N=C(O1)C2=CC=CC=C2)CCOC3=CC=CC4=C3C=CN4CCC(=O)O	3.4	0.00409
809	CCCCN(CC)C(=O)SCCC	159	0
810	CCC(CC)NC1=C(C=C(C(=C1[N+](=O)[O-])C)C)[N+](=O)[O-]	7.21	0
811	COC1=CN=C(N2C1=NC(=N2)NS(=O)(=O)C3=C(C=CC=C3OCC(F)F)C(F)(F)F)OC	0	0.01009
812	C1(=C(C(=C(C(=C1Cl)Cl)Cl)Cl)Cl)[N+](=O)[O-]	819	0
813	C1(=C(C(=C(C(=C1Cl)Cl)Cl)Cl)Cl)O	8.76	0.05441
814	C1(=C(C(=NC(=C1Cl)Cl)Cl)Cl)Cl	362	0
815	CCCC(C)C1(C(=O)NC(=O)NC1=O)CC	0.72	0.39
816	C(C(C(F)(F)S(=O)(=O)O)(F)F)(C(F)(F)F)(F)F	1.15	0.01933
817	C(=O)(C(C(C(C(C(C(C(C(C(F)(F)F)(F)F)(F)F)(F)F)(F)F)(F)F)(F)F)(F)F)(F)F)O	0	0.00284
818	C(=O)(C(C(C(C(C(C(F)(F)F)(F)F)(F)F)(F)F)(F)F)(F)F)O	0	0.00164
819	C(C(C(C(F)(F)S(=O)(=O)O)(F)F)(F)F)(C(C(F)(F)F)(F)F)(F)F	0	0.00134
820	C(=O)(C(C(C(C(C(F)(F)F)(F)F)(F)F)(F)F)(F)F)O	0	0.01676
821	C(=O)(C(C(C(C(C(C(C(C(F)(F)F)(F)F)(F)F)(F)F)(F)F)(F)F)(F)F)(F)F)O	0	0.00099
822	C(C(C(C(C(F)(F)S(=O)(=O)N)(F)F)(F)F)(F)F)(C(C(C(F)(F)F)(F)F)(F)F)(F)F	11.93	0.00152
823	C(C(C(C(C(F)(F)S(=O)(=O)O)(F)F)(F)F)(F)F)(C(C(C(F)(F)F)(F)F)(F)F)(F)F	0	0.00363
824	C(=O)(C(C(C(C(C(C(C(F)(F)F)(F)F)(F)F)(F)F)(F)F)(F)F)(F)F)O	1.64	0.00478
825	C(=O)(C(C(C(C(C(C(C(C(C(C(F)(F)F)(F)F)(F)F)(F)F)(F)F)(F)F)(F)F)(F)F)(F)F)(F)F)O	0	0
826	CC1(C(C1C(=O)OCC2=CC(=CC=C2)OC3=CC=CC=C3)C=C(Cl)Cl)C	68.4	0
827	C1CN2CCC1[C@H](C2)NC(=O)C3=CC4=C(C=C3)OCCO4	3.69	1
828	CC1NN=C2NC3C=CC(=CC=3C(=NC2=1)C1=CC=CC=C1Cl)[N+]([O-])=O	0	0.0135
829	C1=CC(=CC(=C1)N(CC2=CN=CC=C2)C3=CC(=C(C=C3)OC(F)F)OC(F)F)C(=O)O	7.69	0.0142
830	CCOC1=CC=C(C=C1)NC(=O)C	9.35	0.6
831	CC1=CC(=O)N(N1C)C2=CC=CC=C2	0.51	0.97
832	CCC1(C(=O)NC(=O)NC1=O)C2=CC=CC=C2	0	0.49
833	CCC1(C(=O)NC(=NC1=O)[O-])C2=CC=CC=C2.[Na+]	0	0.247
834	C1=CC=C(C=C1)O	5.5	0.6201
835	C1=CC=C2C(=C1)C(OS2(=O)=O)(C3=CC=C(C=C3)O)C4=CC=C(C=C4)O	1.1	0.142
836	C1=CC=C2C(=C1)C(OS2(=O)=O)(C3=CC=C(C=C3)O)C4=CC=C(C=C4)[O-].[Na+]	0	0.0878
837	C1=CC=C2C(=C1)C(=O)OC2(C3=CC=C(C=C3)O)C4=CC=C(C=C4)O	47.4	0.03116
838	C1=CC=C(C(=C1)C(C2=CC=C(C=C2)O)C3=CC=C(C=C3)O)C(=O)O	1.85	0.00918
839	C1=CC=C2C(=C1)NC3=CC=CC=C3S2	0	0.0043
840	C1=CC=C(C=C1)OC(=O)C2=CC=C(C=C2)O	865	0.045
841	CCOP(=S)(OCC)SCSCC	0	0.0129
842	CCOP(=S)(OCC)SCN1C2=C(C=C(C=C2)Cl)OC1=O	25.1	0.00608
843	COP(=S)(OC)SCN1C(=O)C2=CC=CC=C2C1=O	23.82	0.0477
844	C[C@@]12CCN([C@@H]1N(C3=C2C=C(C=C3)OC(=O)NC)C)C	1.64	0.64
845	C1(=C(C(=NC(=C1Cl)Cl)C(=O)O)Cl)N	0	0.23
846	CC(C)NCC(COC1=CC=CC2=C1C=CN2)O	2.53	0.58
847	CCC1=CN=C(C=C1)CCOC2=CC=C(C=C2)CC3C(=O)NC(=O)S3.Cl	8.92	0.0106
848	CCCCOCCOCCOCC1=CC2=C(C=C1CCC)OCO2	76.01	0
849	CS(=O)(=O)C1=C(C=C(C=C1)[C@@H](C[C@H]2CCC(=O)C2)C(=O)NC3=NC=CN=C3)Cl	6.26	0.48
850	CN1CCN(CC1)CC(=O)N2C3=CC=CC=C3C(=O)NC4=C2N=CC=C4	0	0.89
851	CC1=C(N=C(N=C1OC(=O)N(C)C)N(C)C)C	22.53	0.1633
852	CCN(CC)C1=NC(=CC(=N1)OP(=S)(OC)OC)C	49.7	0.0134
853	C1CC1C2=NC3=CC=CC=C3C(=C2/C=C/[C@H](C[C@H](CC(=O)O)O)O)C4=CC=C(C=C4)F	14.5	0.005
854	C(C(C(F)(F)S(=O)(=O)[O-])(F)F)(C(F)(F)F)(F)F.[K+]	1.15	0.01933
855	C(C(C(C(F)(F)S(=O)(=O)[O-])(F)F)(F)F)(C(C(F)(F)F)(F)F)(F)F.[K+]	0	0.00134
856	C(C(C(C(C(F)(F)S(=O)(=O)[O-])(F)F)(F)F)(F)F)(C(C(C(F)(F)F)(F)F)(F)F)(F)F.[K+]	0	0.00363
857	C1CN2C(=O)[C@H](N=C(C3=CC=CC1=C32)C4=CC=CC=C4F)NC(=O)C5=CC6=CC=CC=C6N5	3.24	0.005
858	CC[C@H](C)C(=O)O[C@H]1C[C@@H](C=C2[C@H]1[C@H]([C@H](C=C2)C)CC[C@H](C[C@H](CC(=O)O)O)O)O	3	0.5
859	CC[C@H](C)C(=O)O[C@H]1C[C@@H](C=C2[C@H]1[C@H]([C@H](C=C2)C)CC[C@H](C[C@H](CC(=O)[O-])O)O)O.[Na+]	0	0.361
860	COC1=C(C=C2C(=C1)C(=NC(=N2)N3CCN(CC3)C(=O)C4=CC=CO4)N)OC	3.35	0.06
861	C[C@]12C[C@@H]([C@H]3[C@H]([C@@H]1CC[C@@]2(C(=O)CO)O)CCC4=CC(=O)C=C[C@]34C)O	5.84	0.25
862	C[C@]12CC(=O)[C@H]3[C@H]([C@@H]1CC[C@@]2(C(=O)CO)O)CCC4=CC(=O)C=C[C@]34C	0	0.4818
863	CCN(CC)CCNC(=O)C1=CC=C(C=C1)N	0.72	0.84
864	CCCN(CCOC1=C(C=C(C=C1Cl)Cl)Cl)C(=O)N2C=CN=C2	16.4	0.02237
865	CN1CCN(CC1)CCCN2C3=CC=CC=C3SC4=C2C=C(C=C4)Cl	5.45	0.0027
866	CC12CC1(C(=O)N(C2=O)C3=CC(=CC(=C3)Cl)Cl)C	5.32	0.0499
867	CCCN(CCC)C1=C(C=C(C(=C1[N+](=O)[O-])N)C(F)(F)F)[N+](=O)[O-]	7.22	0
868	CC(=O)[C@H]1CC[C@@H]2[C@@]1(CC[C@H]3[C@H]2CCC4=CC(=O)CC[C@]34C)C	33.7	0.02311
869	CN(C)CCCN1C2=CC=CC=C2SC3=CC=CC=C31	22.59	0.11
870	CC(CN1C2=CC=CC=C2SC3=CC=CC=C31)N(C)C	41.28	0.09
871	CC(C)NC1=NC(=NC(=N1)OC)NC(C)C	8.17	0.0289
872	CC(C)NC1=NC(=NC(=N1)SC)NC(C)C	35.78	0
873	CC(C)N(C1=CC=CC=C1)C(=O)CCl	69.7	0.345
874	CCCNCC(COC1=CC=CC=C1C(=O)CCC2=CC=CC=C2)O	38.94	0.04
875	CCCOC(=O)NCCCN(C)C.Cl	5.82	0.8435
876	CC(C)(C)C1=CC=C(C=C1)OC2CCCCC2OS(=O)OCC#C	24	0.0133
877	CCNP(=S)(OC)O/C(=C/C(=O)OC(C)C)/C	16.24	0.00979
878	CCCC1COC(O1)(CN2C=NC=N2)C3=C(C=C(C=C3)Cl)Cl	17	0.0508
879	CC(C)C1=C(C(=CC=C1)C(C)C)O	107	0.016
880	CC(C)OC1=CC=CC=C1OC(=O)NC	6.9	0.2159
881	CCCOC1=NN(C(=O)N1C)C(=O)[N-]S(=O)(=O)C2=CC=CC=C2C(=O)OC.[Na+]	0.91	0.00891
882	CCC(=O)O[C@](CC1=CC=CC=C1)(C2=CC=CC=C2)[C@H](C)CN(C)C	11	0.24
883	CC(C)NCC(COC1=CC=CC2=CC=CC=C21)O	14.67	0.282
884	CCCOC(=O)C1=CC=C(C=C1)O	38	0.07639
885	CC(C)(C#C)NC(=O)C1=CC(=CC(=C1)Cl)Cl	5.4	0.06756
886	CC1=NC(=NC(=N1)OC)NC(=O)NS(=O)(=O)C2=CC=CC=C2CCC(F)(F)F	10.37	0
887	CC1=CC(=C(C=C1O)C)C2(C3=CC=CC=C3S(=O)(=O)O2)C4=C(C=C(C(=C4)C)O)C	0	0.0261
888	CC1=NNC(=O)N(C1)/N=C/C2=CN=CC=C2	8.61	0.9946
889	COC(=O)N(C1=CC=CC=C1COC2=NN(C=C2)C3=CC=C(C=C3)Cl)OC	53.93	0.00158
890	CCOC(=O)COC1=C(C=C(C(=C1)C2=NN(C(=C2Cl)OC(F)F)C)F)Cl	71.6	0.435
891	C1=CC2=C3C(=C1)C=CC4=CC=CC(=C43)C=C2	6.18	0.02415
892	CC(C)(C)C1=CC=C(C=C1)CSC2=C(C(=O)N(N=C2)C(C)(C)C)Cl	63.93	0
893	CCC1=C(C(=NC(=N1)N)N)C2=CC=C(C=C2)Cl	2.77	0.1177
894	CC1=CC(=NC(=N1)NC2=CC=CC=C2)C	43.89	0.01673
895	CC(COC1=CC=C(C=C1)OC2=CC=CC=C2)OC3=CC=CC=N3	16.86	0.00091
896	COC1=CC(=NC(=N1)SC2=C(C(=CC=C2)Cl)C(=O)[O-])OC.[Na+]	0	0.0334
897	C1=CC(=C(C=C1C2=C(C(=O)C3=C(C=C(C=C3O2)O)O)O)O)O	75.2	0.0176
898	C1=CC(=C(C2=NC=C(C=C21)Cl)C(=O)O)Cl	0	0.02799
899	COC1=CC2=C(C=CN=C2C=C1)[C@@H]([C@H]3C[C@@H]4CCN3C[C@@H]4C=C)O	6.62	0.13
900	C1=CC=C2C(=C1)C=CC=N2	38.6	0.2036
901	C1=CC=C(C=C1)OC2=C3C=CC=CN3C(=O)C(=C2)C(=O)NC4=NNN=N4	0	0.0191
902	C1=CC(=CC=C1OC2=C3C(=CC(=CC3=NC=C2)Cl)Cl)F	0	0
903	C1CCN(CC1)CCOC2=CC=C(C=C2)C(=O)C3=C(SC4=C3C=CC(=C4)O)C5=CC=C(C=C5)O.Cl	43.7	0.0129
904	CN/C(=C\[N+](=O)[O-])/NCCSCC1=CC=C(O1)CN(C)C	1.32	0.95
905	CCOC1=C(C=CC(=C1)CC(=O)N[C@@H](CC(C)C)C2=CC=CC=C2N3CCCCC3)C(=O)O	0	0.015
906	CO[C@H]1[C@@H](C[C@@H]2CN3CCC4=C([C@H]3C[C@@H]2[C@@H]1C(=O)OC)NC5=C4C=CC(=C5)OC)OC(=O)C6=CC(=C(C(=C6)OC)OC)OC	12.25	0.00599
907	CC(=CC1C(C1(C)C)C(=O)OCC2=COC(=C2)CC3=CC=CC=C3)C	98.96	0
908	C1=CC(=CC(=C1)O)O	14.48	0.7448
909	C1=CC(=CC=C1/C=C/C2=CC(=CC(=C2)O)O)O	62.9	0
910	CC1=C(C(CCC1)(C)C)/C=C/C(=C/C=C/C(=C/C(=O)O)/C)/C	10.5	0.00597
911	CCNC1=CC2=C(C=C1C)C(=C3C=C(C(=[NH+]CC)C=C3O2)C)C4=CC=CC=C4C(=O)OCC.[Cl-]	0	0
912	C[C@]12OC3=C(C1=O)C1=C(C(=O)C(NC(=O)C(C)=CC=C[C@H](C)[C@H](O)[C@@H](C)[C@@H](O)[C@@H](C)[C@H](OC(C)=O)[C@H](C)[C@H](C=CO2)OC)=C2NC4(CCN(CC(C)C)CC4)N=C21)C(O)=C3C	0	0.29
913	C[C@H]1/C=C/C=C(\C(=O)NC2=C(C(=C3C(=C2O)C(=C(C4=C3C(=O)[C@](O4)(O/C=C/[C@@H]([C@H]([C@H]([C@@H]([C@@H]([C@@H]([C@H]1O)C)O)C)OC(=O)C)C)OC)C)C)O)O)/C=N/N5CCN(CC5)C)/C	0	0.04344
914	CCS(=O)(=O)C1=C(N=CC=C1)S(=O)(=O)NC(=O)NC2=NC(=CC(=N2)OC)OC	0	0.6278
915	CC1=C(C(=O)N2CCCCC2=N1)CCN3CCC(CC3)C4=NOC5=C4C=CC(=C5)F	10.9	0.1
916	CC(C)C1=NC(=CS1)CN(C)C(=O)N[C@@H](C(C)C)C(=O)N[C@@H](CC2=CC=CC=C2)C[C@@H]([C@H](CC3=CC=CC=C3)NC(=O)OCC4=CN=CS4)O	8.57	0.015
917	CCCN1CCCC[C@H]1C(=O)NC2=C(C=CC=C2C)C	15.49	0.06
918	CC(=C)[C@H]1CC2=C(O1)C=CC3=C2O[C@@H]4COC5=CC(=C(C=C5[C@@H]4C3=O)OC)OC	28.31	0.0034
919	C1=CC=C2C(=C1)C(=O)NS2(=O)=O	1.92	0.2258
920	C=CCC1=CC2=C(C=C1)OCO2	14.12	0.01789
921	CC(C)(C)NC(=O)[C@@H]1C[C@@H]2CCCC[C@@H]2CN1C[C@H]([C@H](CC3=CC=CC=C3)NC(=O)[C@H](CC(=O)N)NC(=O)C4=NC5=CC=CC=C5C=C4)O	0	0.028
922	CCN1CCC2(CC1)COC3=C2C=C4C(=C3)CCN4C(=O)C5=CC=C(C=C5)C6=C(C=C(C=C6)C7=NN=C(O7)C)C.Cl	4.65	0.015
923	CC1=C(C(=O)C[C@@H]1OC(=O)[C@@H]2[C@H](C2(C)C)C=C(C)C)CC=C	45.9	0
924	CC(C)NC1=NC(=NC(=N1)N)Cl	0	0.486
925	CN1[C@@H]2CC(C[C@H]1[C@H]3[C@@H]2O3)OC(=O)[C@H](CO)C4=CC=CC=C4	7.4	0.9
926	CCC(C)NC1=NC(=NC(=N1)NCC)OC	6.53	0.0461
927	CCC/C(=N\OCC)/C1=C(CC(CC1=O)CC(C)SCC)O	11.87	0.05472
928	CCCC1=NN(C2=C1N=C(NC2=O)C3=C(C=CC(=C3)S(=O)(=O)N4CCN(CC4)C)OCC)C	9.35	0.04
929	CCNC1=NC(=NC(=N1)Cl)NCC	6.33	0.2845
930	CCC(C)(C)C(=O)O[C@H]1C[C@H](C=C2[C@H]1[C@H]([C@H](C=C2)C)CC[C@@H]3C[C@H](CC(=O)O3)O)C	24.3	0.00398
931	[Na+].CC1C(=CC(Br)=C([O-])C=1Br)C1(C2=CC(Br)=C(O)C(Br)=C2C)C2=CC=CC=C2OS1(=O)=O	0	0.00511
932	C1=CC=C2C(=C1)N=C(S2)[S-].[Na+]	41.7	0.0368
933	C1=CC(=CC=C1[N+](=O)[O-])[O-].[Na+]	48.1	0.17
934	[Na+].CC1=CC(=O)/C(/C(=O)O1)=C(/C)[O-]	0	0.062
935	C1=CC=C2C(=C1)C(=O)[N-]S2(=O)=O.O.[Na+]	0	0.698
936	CCCN(CC)CC1COC2(O1)CCC(CC2)C(C)(C)C	3.35	0.00545
937	C1CN2CC3=CCO[C@H]4CC(=O)N5[C@H]6[C@H]4[C@H]3C[C@H]2[C@@]61C7=CC=CC=C75	2	0.457
938	C=CC1=CC=CC=C1	42.99	0.1801
939	CC1([C@@H](N2[C@H](S1(=O)=O)CC2=O)C(=O)O)C	3	0.62
940	CC1=CC(=NC(=N1)NS(=O)(=O)C2=CC=C(C=C2)N)C	0	0.175
941	C1=CC=C2C(=C1)N=CC(=N2)NS(=O)(=O)C3=CC=C(C=C3)N	0	0.0037
942	C1=CC=NC(=C1)NS(=O)(=O)C2=CC=C(C=C2)N=NC3=CC(=C(C=C3)O)C(=O)O	5.16	0.004
943	CC1=NN(C(=O)N1C(F)F)C2=C(C=C(C(=C2)NS(=O)(=O)C)Cl)Cl	5.72	0.9933
944	CCOP(=S)(OCC)OP(=S)(OCC)OCC	101	0.0206
945	COC1=C(C=C(C(=C1)O)C(=O)C2=CC=CC=C2)S(=O)(=O)O	1.05	0.00942
946	CCN1CCCC1CNC(=O)C2=C(C=CC(=C2)S(=O)(=O)N)OC	0	1
947	CNS(=O)(=O)CC1=CC2=C(C=C1)NC=C2CCN(C)C	2.41	0.83
948	CC(C1=CC=C(C=C1)C(=O)C2=CC=CS2)C(=O)O	9.77	0.006
949	CCC1=C(N(N=C1C(=O)NN2CCCCC2)C3=C(C=C(C=C3)Cl)Cl)C4=CC=C(C=C4)Br	0	0
950	C1CCC2=NC3=CC=CC=C3C(=C2C1)N	1000	1
951	C[C@@H]1C[C@@H]([C@@H]2[C@H](C[C@H]([C@@](O2)(C(=O)C(=O)N3CCCC[C@H]3C(=O)O[C@@H]([C@@H]([C@H](CC(=O)[C@@H](/C=C(/C1)\C)CC=C)O)C)/C(=C/[C@@H]4CC[C@H]([C@@H](C4)OC)O)/C)O)C)OC)OC	0	0.01
952	CC/C(=C(\C1=CC=CC=C1)/C2=CC=C(C=C2)OCCN(C)C)/C3=CC=CC=C3	0	0.00165
953	CC/C(=C(\C1=CC=CC=C1)/C2=CC=C(C=C2)OCCN(C)C)/C3=CC=CC=C3.C(C(=O)O)C(CC(=O)O)(C(=O)O)O	0	0.0012
954	C1=C(C=C(C(=C1O)O)O)C(=O)OC2=CC(=CC(=C2O)O)C(=O)OC[C@@H]3[C@H]([C@@H]([C@H]([C@@H](O3)OC(=O)C4=CC(=C(C(=C4)OC(=O)C5=CC(=C(C(=C5)O)O)O)O)O)OC(=O)C6=CC(=C(C(=C6)OC(=O)C7=CC(=C(C(=C7)O)O)O)O)O)OC(=O)C8=CC(=C(C(=C8)OC(=O)C9=CC(=C(C(=C9)O)O)O)O)O)OC(=O)C1=CC(=C(C(=C1)OC(=O)C1=CC(=C(C(=C1)O)O)O)O)O	0	1
955	CC(C)(C)C(CCC1=CC=C(C=C1)Cl)(CN2C=NC=N2)O	5.28	0.06601
956	CCC1=CC=C(C=C1)C(=O)NN(C(=O)C2=CC(=CC(=C2)C)C)C(C)(C)C	22.4	0.03378
957	CCC1=NN(C(=C1Cl)C(=O)NCC2=CC=C(C=C2)C(C)(C)C)C	15.94	0
958	CCOP(=S)(OC1=CN=C(N=C1)C(C)(C)C)OC(C)C	22.64	0
959	CC(C)(C)C1=NN=C(S1)N(C)C(=O)NC	5.28	0.4172
960	CC1=C(C(=C(C(=C1F)F)COC(=O)[C@H]2[C@H](C2(C)C)/C=C(/C(F)(F)F)\Cl)F)F	24.81	0
961	CCCC1=NC2=C(N1CC3=CC=C(C=C3)C4=CC=CC=C4C(=O)O)C=C(C=C2C)C5=NC6=CC=CC=C6N5C	3.98	0.004
962	CN1C2=C(C=C(C=C2)Cl)C(=NC(C1=O)O)C3=CC=CC=C3	2.34	0.017
963	CS(=O)(=O)C1=C(C(=C(C=C1)C(=O)C2C(=O)CCCC2=O)Cl)COCC(F)(F)F	0	0.0919
964	CN1C(=C(C2=C(S1(=O)=O)C=CS2)O)C(=O)NC3=CC=CC=N3	1.87	0.009
965	CC/C(=N\OC/C=C/Cl)/C1=C(CC(CC1=O)C2CCOCC2)O	3.35	0.3834
966	CC1=C(C(=O)N(C(=O)N1)C(C)(C)C)Cl	2.27	0.1029
967	CCOP(=S)(OCC)SCSC(C)(C)C	32.5	0.0306
968	CC(C)(C)NCC(C1=CC(=CC(=C1)O)O)O	0	0.75
969	CCC(C)(C)OC	10.6	0.8097
970	C[C@]12CC[C@H]3[C@H]([C@@H]1CC[C@@H]2O)CCC4=CC(=O)CC[C@]34C	28.83	0.057
971	CCC(=O)O[C@H]1CC[C@@H]2[C@@]1(CC[C@H]3[C@H]2CCC4=CC(=O)CC[C@]34C)C	427	0
972	CCOC(=O)C1=CC=CC=C1C(=C2C=C(C(=O)C(=C2)Br)Br)C3=CC(=C(C(=C3)Br)O)Br	0	0.0114
973	CCCC[N+](CCCC)(CCCC)CCCC.[Br-]	0.36	0.9242
974	C(=C(Cl)Cl)(Cl)Cl	0.05	0.2463
975	C1=CC(=C(C=C1Cl)Cl)C(CN2C=NC=N2)COC(C(F)F)(F)F	0	0.02484
976	C[C@@]1([C@H]2C[C@H]3[C@@H](C(=O)C(=C([C@]3(C(=O)C2=C(C4=C1C=CC=C4O)O)O)O)C(=O)N)N(C)C)O	0	0.468
977	CCN(CC)C(=S)SSC(=S)N(CC)CC	28.46	0.08601
978	COC1=C(C=CC(=C1)CCC(=O)CC(=O)CCC2=CC(=C(C=C2)O)OC)O	173	0.0501
979	C1CCOC1	9879	0.8251
980	CC(=CC1C(C1(C)C)C(=O)OCN2C(=O)C3=C(C2=O)CCCC3)C	37.6	0
981	CN(C)C(=S)SC(=S)N(C)C	18.06	0.6276
982	CN1C=NC2=C1C(=O)NC(=O)N2C	396	0.955
983	CN1C2=C(C(=O)N(C1=O)C)NC=N2	0.78	0.61
984	C1=CC=C2C(=C1)NC(=N2)C3=CSC=N3	0	0.1382
985	C1CSC(=NC#N)N1CC2=CN=C(C=C2)Cl	2.57	0.2857
986	CN\1COCN(/C1=N/[N+](=O)[O-])CC2=CN=C(S2)Cl	0.61	0.8286
987	CC(C)CC1=C(C(=NC(=C1C(=O)OC)C(F)F)C(F)(F)F)C2=NCCS2	41.5	0.01139
988	C1=CC=C(C=C1)NC(=O)NC2=CN=NS2	4.92	0.02837
989	CCN(CC)C(=O)SCC1=CC=C(C=C1)Cl	233	0
990	COC(=O)NC(=S)NC1=CC=CC=C1NC(=S)NC(=O)OC	2.47	0.427
991	CN1CCCCC1CCN2C3=CC=CC=C3SC4=C2C=C(C=C4)SC	0.92	0.0217
992	CC1=CC=C(C=C1)S(=O)(=O)NC(=O)NN2CCCCCC2	0	0.065
993	CCCCNC(=O)NS(=O)(=O)C1=CC=C(C=C1)C	1.32	0.04
994	CC1=CC=C(C=C1)C(=O)C2=CC(=C(C(=C2)O)O)[N+](=O)[O-]	22	0.0133
995	CC/C(=N\OCC)/C1=C(CC(CC1=O)C2=C(C=C(C=C2C)C)C)O	0	0.169
996	C1CN(CCN1CCCN2C(=O)N3C=CC=CC3=N2)C4=CC(=CC=C4)Cl	7.4	0.08
997	C1CN(CCN1CCC2=CC(=O)N(C3=C2C=CC(=C3)F)CC(=O)N)C4=NC=CC5=C4C=CS5	7.06	0.0607
998	CC(=O)OCC(COC(=O)C)OC(=O)C	393	6e-05
999	CC(C)(C)C(=O)C(N1C=NC=N1)OC2=CC=C(C=C2)Cl	14.59	0.1142
1000	CC(C)(C)C(C(N1C=NC=N1)OC2=CC=C(C=C2)Cl)O	0	0.1258
1001	CC(C)N(C(C)C)C(=O)SCC(=C(Cl)Cl)Cl	2.89	0
1002	C[C@]12C[C@@H]([C@]3([C@H]([C@@H]1C[C@H]([C@@]2(C(=O)CO)O)O)CCC4=CC(=O)C=C[C@@]43C)F)O	2.49	0.7348
1003	C1=CC=C(C=C1)C2=NC3=C(N=C(N=C3N=C2N)N)N	0	0.333
1004	CC1=NC(=NC(=N1)OC)NC(=O)NS(=O)(=O)C2=CC=CC=C2OCCCl	14.58	0.02305
1005	CC1=NN=C2N1C3=C(C=C(C=C3)Cl)C(=NC2)C4=CC=CC=C4Cl	2.49	0.1
1006	CCOP(=S)(OCC)OC1=NN(C=N1)C2=CC=CC=C2	30.2	0.049
1007	CCCCSP(=O)(SCCCC)SCCCC	125.1	0.06651
1008	CCCCOP(=O)(OCCCC)OCCCC	0	0.03481
1009	COP(=O)(C(C(Cl)(Cl)Cl)O)OC	31.7	0.696
1010	C(=C(Cl)Cl)Cl	10.98	0.295
1011	C1=C(C(=NC(=C1Cl)Cl)OCC(=O)O)Cl	0	0.02237
1012	C1=CC(=C(C=C1Cl)O)OC2=C(C=C(C=C2)Cl)Cl	27.8	0.00428
1013	CCCCCCCC[Si](OCC)(OCC)OCC	11.06	0.026
1014	CCCCC(CC)C(=O)OCCOCCOCCOC(=O)C(CC)CCCC	22.62	0
1015	CC(=O)OCCOCCOCCOC(=O)C	206	0.895
1016	COCCOCCOCCOC	0	0.66
1017	C/C(=N\OCC1=CC=CC=C1/C(=N\OC)/C(=O)OC)/C2=CC(=CC=C2)C(F)(F)F	466	0.0072
1018	COC1=CC(=NC(=N1)NC(=O)[N-]S(=O)(=O)C2=C(C=CC=N2)OCC(F)(F)F)OC.[Na+]	0	0.00376
1019	CCCOCC(=NC1=C(C=C(C=C1)Cl)C(F)(F)F)N2C=CN=C2	19.6	0.00839
1020	CCCN(CCC)C1=C(C=C(C=C1[N+](=O)[O-])C(F)(F)F)[N+](=O)[O-]	210	0.00252
1021	CC1=C(C(=CC=C1)C(=O)OC)S(=O)(=O)NC(=O)NC2=NC(=NC(=N2)OCC(F)(F)F)N(C)C	14.47	0.3292
1022	CC(CN1C2=CC=CC=C2CCC3=CC=CC=C31)CN(C)C	58.41	0.051
1023	CCOC(=O)C1CC(=O)C(=C(C2CC2)O)C(=O)C1	3.82	0.137
1024	C1=CC=C(C=C1)OP(=O)(OC2=CC=CC=C2)OC3=CC=CC=C3	26.44	0.00285
1025	C1=CC=C(C=C1)P(=O)(C2=CC=CC=C2)C3=CC=CC=C3	0	0.101
1026	C1=CC=C(C=C1)[Sn](C2=CC=CC=C2)C3=CC=CC=C3.O	7.75	0
1027	C(C(CCl)OP(=O)(OC(CCl)CCl)OC(CCl)CCl)Cl	5.09	0.01078
1028	C(C(CBr)Br)OP(=O)(OCC(CBr)Br)OCC(CBr)Br	177	0.00703
1029	C1C(O1)CN2C(=O)N(C(=O)N(C2=O)CC3CO3)CC4CO4	180	0.402
1030	C(CCl)OP(=O)(OCCCl)OCCCl	2.04	0.44
1031	CC1(CC/C(=C\C2=CC=C(C=C2)Cl)/C1(CN3C=NC=N3)O)C	6.12	0.1373
1032	CC1=C(C2=C(CCC(O2)(C)COC3=CC=C(C=C3)CC4C(=O)NC(=O)S4)C(=C1O)C)C	21.85	0.00094
1033	C[C@@H]1CN[C@H](C(=O)N([C@@H](C(=O)N[C@@H](C(=O)NCCCC2=CC=CC=C2O1)CC3=CC=C(C=C3)F)C)C)C4CC4	26.92	0.01
1034	CCCC(CCC)C(=O)O	0.44	0.214
1035	CCCN(CCC)C(=O)SCCC	25.1	0.01906
1036	CC1(C(=O)N(C(=O)O1)C2=CC(=CC(=C2)Cl)Cl)C=C	18.34	0.5936
1037	CC[C@@]12CCCN3[C@@H]1C4=C(CC3)C5=CC=CC=C5N4C(=C2)C(=O)OCC	0	0.02
1038	C=CCl	147.3	0.5924
1039	C=CN1CCCC1=O	0	0.953
1040	COC1=CC=CC(=C1OC)[C@@H](C2CCN(CC2)CCC3=CC=C(C=C3)F)O	5.46	0.5097
1041	CC(=O)CC(C1=CC=CC=C1)C2=C(C3=CC=CC=C3OC2=O)O	0	0.01327
1042	CCN(C1=CC=CC(=C1)C2=CC=NC3=C(C=NN23)C#N)C(=O)C	2.84	0.4
1043	C1C[C@H](CN(C1)CCC2=CC3=C(C=C2)OCO3)OC(C4=CC=CC=C4)C5=CC=CC=C5	17.11	0.00211
1044	CC(C1=CC2=CC=CC=C2S1)N(C(=O)N)O	2.3	0.07
1045	CC1=CC=C(C=C1)C2=C(N3C=C(C=CC3=N2)C)CC(=O)N(C)C	3.27	0.08
1046	CCC(C)(C(=O)CCl)NC(=O)C1=CC(=C(C(=C1)Cl)C)Cl	4.19	0.01031
