# Supplementary material for: Insights into pharmacokinetic properties for exposure chemicals: predictive modelling of human plasma fraction unbound (fu) and hepatocyte intrinsic clearance (Clint) data using machine learning
Source: Royal Society of Chemistry journal article supplement (doi:10.1039/d4dd00082j), 2024-01-01
Supplement: d4dd00082j3.sdf [file d4dd00082j3.sdf]

1
  Mrv0541 12152312282D          

 16 16  0  0  0  0            999 V2000
    0.7145    2.0625    0.0000 N   0  0  0  0  0  0  0  0  0  0  0  0
    0.7145    1.2375    0.0000 C   0  0  0  0  0  0  0  0  0  0  0  0
    1.4289    0.8250    0.0000 C   0  0  0  0  0  0  0  0  0  0  0  0
    2.1434    1.2375    0.0000 Cl  0  0  0  0  0  0  0  0  0  0  0  0
    1.4289   -0.0000    0.0000 C   0  0  0  0  0  0  0  0  0  0  0  0
    0.7145   -0.4125    0.0000 N   0  0  0  0  0  0  0  0  0  0  0  0
    0.0000    0.0000    0.0000 C   0  0  0  0  0  0  0  0  0  0  0  0
   -0.7145   -0.4125    0.0000 Cl  0  0  0  0  0  0  0  0  0  0  0  0
    0.0000    0.8250    0.0000 C   0  0  0  0  0  0  0  0  0  0  0  0
   -0.7145    1.2375    0.0000 Cl  0  0  0  0  0  0  0  0  0  0  0  0
    2.1434   -0.4125    0.0000 C   0  0  0  0  0  0  0  0  0  0  0  0
    2.8579   -0.0000    0.0000 O   0  0  0  0  0  0  0  0  0  0  0  0
    2.1434   -1.2375    0.0000 O   0  0  0  0  0  0  0  0  0  0  0  0
    1.4289    2.4750    0.0000 H   0  0  0  0  0  0  0  0  0  0  0  0
    0.0000    2.4750    0.0000 H   0  0  0  0  0  0  0  0  0  0  0  0
    3.5724   -0.4125    0.0000 H   0  0  0  0  0  0  0  0  0  0  0  0
  1  2  1  0  0  0  0
  2  3  4  0  0  0  0
  3  4  1  0  0  0  0
  3  5  4  0  0  0  0
  5  6  4  0  0  0  0
  6  7  4  0  0  0  0
  7  8  1  0  0  0  0
  7  9  4  0  0  0  0
  2  9  4  0  0  0  0
  9 10  1  0  0  0  0
  5 11  1  0  0  0  0
 11 12  1  0  0  0  0
 11 13  2  0  0  0  0
  1 14  1  0  0  0  0
  1 15  1  0  0  0  0
 12 16  1  0  0  0  0
M  END
$$$$
2
  Mrv0541 12152312282D          

 30 31  0  0  0  0            999 V2000
    1.4289    0.0000    0.0000 C   0  0  0  0  0  0  0  0  0  0  0  0
    2.1434   -0.4125    0.0000 C   0  0  0  0  0  0  0  0  0  0  0  0
    2.1434   -1.2375    0.0000 C   0  0  0  0  0  0  0  0  0  0  0  0
    2.8579   -1.6500    0.0000 C   0  0  0  0  0  0  0  0  0  0  0  0
    2.8579   -2.4750    0.0000 C   0  0  0  0  0  0  0  0  0  0  0  0
    2.1434   -2.8875    0.0000 C   0  0  0  0  0  0  0  0  0  0  0  0
    1.4289   -2.4750    0.0000 C   0  0  0  0  0  0  0  0  0  0  0  0
    1.4289   -1.6500    0.0000 C   0  0  0  0  0  0  0  0  0  0  0  0
    2.1434   -3.7125    0.0000 O   0  0  0  0  0  0  0  0  0  0  0  0
    2.8579    0.0000    0.0000 C   0  0  0  0  0  0  0  0  0  0  0  0
    2.8579    0.8250    0.0000 C   0  0  0  0  0  0  0  0  0  0  0  0
    3.5724    1.2375    0.0000 C   0  0  0  0  0  0  0  0  0  0  0  0
    4.2868    0.8250    0.0000 C   0  0  0  0  0  0  0  0  0  0  0  0
    4.2868    0.0000    0.0000 C   0  0  0  0  0  0  0  0  0  0  0  0
    3.5724   -0.4125    0.0000 C   0  0  0  0  0  0  0  0  0  0  0  0
    5.0013    1.2375    0.0000 O   0  0  0  0  0  0  0  0  0  0  0  0
    1.8414    0.7145    0.0000 H   0  0  0  0  0  0  0  0  0  0  0  0
    0.7145    0.4125    0.0000 H   0  0  0  0  0  0  0  0  0  0  0  0
    1.0164   -0.7145    0.0000 H   0  0  0  0  0  0  0  0  0  0  0  0
    1.4289   -0.8250    0.0000 H   0  0  0  0  0  0  0  0  0  0  0  0
    3.3882   -1.0180    0.0000 H   0  0  0  0  0  0  0  0  0  0  0  0
    3.5724   -2.8875    0.0000 H   0  0  0  0  0  0  0  0  0  0  0  0
    0.7145   -2.8875    0.0000 H   0  0  0  0  0  0  0  0  0  0  0  0
    0.7145   -1.2375    0.0000 H   0  0  0  0  0  0  0  0  0  0  0  0
    1.4289   -4.1250    0.0000 H   0  0  0  0  0  0  0  0  0  0  0  0
    2.1434    1.2375    0.0000 H   0  0  0  0  0  0  0  0  0  0  0  0
    3.5724    2.0625    0.0000 H   0  0  0  0  0  0  0  0  0  0  0  0
    5.0013   -0.4125    0.0000 H   0  0  0  0  0  0  0  0  0  0  0  0
    3.5724   -1.2375    0.0000 H   0  0  0  0  0  0  0  0  0  0  0  0
    5.7158    0.8250    0.0000 H   0  0  0  0  0  0  0  0  0  0  0  0
  1  2  1  0  0  0  0
  2  3  1  0  0  0  0
  3  4  4  0  0  0  0
  4  5  4  0  0  0  0
  5  6  4  0  0  0  0
  6  7  4  0  0  0  0
  7  8  4  0  0  0  0
  3  8  4  0  0  0  0
  6  9  1  0  0  0  0
  2 10  1  0  0  0  0
 10 11  4  0  0  0  0
 11 12  4  0  0  0  0
 12 13  4  0  0  0  0
 13 14  4  0  0  0  0
 14 15  4  0  0  0  0
 10 15  4  0  0  0  0
 13 16  1  0  0  0  0
  1 17  1  0  0  0  0
  1 18  1  0  0  0  0
  1 19  1  0  0  0  0
  2 20  1  0  0  0  0
  4 21  1  0  0  0  0
  5 22  1  0  0  0  0
  7 23  1  0  0  0  0
  8 24  1  0  0  0  0
  9 25  1  0  0  0  0
 11 26  1  0  0  0  0
 12 27  1  0  0  0  0
 14 28  1  0  0  0  0
 15 29  1  0  0  0  0
 16 30  1  0  0  0  0
M  END
$$$$
3
  Mrv0541 12152312282D          

 37 41  0  0  0  0            999 V2000
    4.7943    0.2407    0.0000 C   0  0  0  0  0  0  0  0  0  0  0  0
    4.5396    1.0254    0.0000 C   0  0  0  0  0  0  0  0  0  0  0  0
    3.7327    1.1972    0.0000 C   0  0  0  0  0  0  0  0  0  0  0  0
    3.1805    0.5843    0.0000 C   0  0  0  0  0  0  0  0  0  0  0  0
    3.4352   -0.2004    0.0000 C   0  0  0  0  0  0  0  0  0  0  0  0
    4.2421   -0.3722    0.0000 C   0  0  0  0  0  0  0  0  0  0  0  0
    2.7676   -0.6852    0.0000 C   0  0  0  0  0  0  0  0  0  0  0  0
    2.7674   -1.5102    0.0000 O   0  0  0  0  0  0  0  0  0  0  0  0
    2.1003   -0.2000    0.0000 O   0  0  0  0  0  0  0  0  0  0  0  0
    2.3555    0.5845    0.0000 C   0  0  0  0  0  0  0  0  0  0  0  0
    2.6913    1.3381    0.0000 C   0  0  0  0  0  0  0  0  0  0  0  0
    2.2065    2.0057    0.0000 C   0  0  0  0  0  0  0  0  0  0  0  0
    2.5423    2.7592    0.0000 C   0  0  0  0  0  0  0  0  0  0  0  0
    3.3628    2.8452    0.0000 C   0  0  0  0  0  0  0  0  0  0  0  0
    3.8475    2.1777    0.0000 C   0  0  0  0  0  0  0  0  0  0  0  0
    3.5118    1.4241    0.0000 C   0  0  0  0  0  0  0  0  0  0  0  0
    3.6986    3.5988    0.0000 O   0  0  0  0  0  0  0  0  0  0  0  0
    1.3860    1.9197    0.0000 O   0  0  0  0  0  0  0  0  0  0  0  0
    1.0502    1.1661    0.0000 C   0  0  0  0  0  0  0  0  0  0  0  0
    1.5350    0.4985    0.0000 C   0  0  0  0  0  0  0  0  0  0  0  0
    1.1992   -0.2551    0.0000 C   0  0  0  0  0  0  0  0  0  0  0  0
    0.3787   -0.3411    0.0000 C   0  0  0  0  0  0  0  0  0  0  0  0
   -0.1060    0.3265    0.0000 C   0  0  0  0  0  0  0  0  0  0  0  0
    0.2297    1.0801    0.0000 C   0  0  0  0  0  0  0  0  0  0  0  0
   -0.9265    0.2405    0.0000 O   0  0  0  0  0  0  0  0  0  0  0  0
    5.6012    0.0690    0.0000 H   0  0  0  0  0  0  0  0  0  0  0  0
    5.0918    1.6384    0.0000 H   0  0  0  0  0  0  0  0  0  0  0  0
    3.4780    1.9819    0.0000 H   0  0  0  0  0  0  0  0  0  0  0  0
    4.4968   -1.1569    0.0000 H   0  0  0  0  0  0  0  0  0  0  0  0
    2.0576    3.4268    0.0000 H   0  0  0  0  0  0  0  0  0  0  0  0
    4.6680    2.2637    0.0000 H   0  0  0  0  0  0  0  0  0  0  0  0
    3.9965    0.7565    0.0000 H   0  0  0  0  0  0  0  0  0  0  0  0
    4.5191    3.6848    0.0000 H   0  0  0  0  0  0  0  0  0  0  0  0
    1.6839   -0.9227    0.0000 H   0  0  0  0  0  0  0  0  0  0  0  0
    0.0429   -1.0947    0.0000 H   0  0  0  0  0  0  0  0  0  0  0  0
   -0.2550    1.7477    0.0000 H   0  0  0  0  0  0  0  0  0  0  0  0
   -1.4113    0.9081    0.0000 H   0  0  0  0  0  0  0  0  0  0  0  0
  1  2  4  0  0  0  0
  2  3  4  0  0  0  0
  3  4  4  0  0  0  0
  4  5  4  0  0  0  0
  5  6  4  0  0  0  0
  1  6  4  0  0  0  0
  5  7  1  0  0  0  0
  7  8  2  0  0  0  0
  7  9  1  0  0  0  0
  9 10  1  0  0  0  0
  4 10  1  0  0  0  0
 10 11  1  0  0  0  0
 11 12  4  0  0  0  0
 12 13  4  0  0  0  0
 13 14  4  0  0  0  0
 14 15  4  0  0  0  0
 15 16  4  0  0  0  0
 11 16  4  0  0  0  0
 14 17  1  0  0  0  0
 12 18  1  0  0  0  0
 18 19  1  0  0  0  0
 19 20  4  0  0  0  0
 10 20  1  0  0  0  0
 20 21  4  0  0  0  0
 21 22  4  0  0  0  0
 22 23  4  0  0  0  0
 23 24  4  0  0  0  0
 19 24  4  0  0  0  0
 23 25  1  0  0  0  0
  1 26  1  0  0  0  0
  2 27  1  0  0  0  0
  3 28  1  0  0  0  0
  6 29  1  0  0  0  0
 13 30  1  0  0  0  0
 15 31  1  0  0  0  0
 16 32  1  0  0  0  0
 17 33  1  0  0  0  0
 21 34  1  0  0  0  0
 22 35  1  0  0  0  0
 24 36  1  0  0  0  0
 25 37  1  0  0  0  0
M  END
$$$$
4
  Mrv0541 12152312282D          

 27 28  0  0  0  0            999 V2000
    3.2789    1.2375    0.0000 C   0  0  0  0  0  0  0  0  0  0  0  0
    3.9934    0.8250    0.0000 C   0  0  0  0  0  0  0  0  0  0  0  0
    3.9934    0.0000    0.0000 C   0  0  0  0  0  0  0  0  0  0  0  0
    3.2789   -0.4125    0.0000 C   0  0  0  0  0  0  0  0  0  0  0  0
    2.5645    0.0000    0.0000 C   0  0  0  0  0  0  0  0  0  0  0  0
    2.5645    0.8250    0.0000 C   0  0  0  0  0  0  0  0  0  0  0  0
    1.7798    1.0799    0.0000 C   0  0  0  0  0  0  0  0  0  0  0  0
    1.5249    1.8646    0.0000 O   0  0  0  0  0  0  0  0  0  0  0  0
    1.2949    0.4125    0.0000 N   0  0  0  0  0  0  0  0  0  0  0  0
    1.7798   -0.2549    0.0000 C   0  0  0  0  0  0  0  0  0  0  0  0
    1.5249   -1.0396    0.0000 O   0  0  0  0  0  0  0  0  0  0  0  0
    0.4699    0.4125    0.0000 S   0  0  0  0  0  0  0  0  0  0  0  0
    0.0574    1.1270    0.0000 C   0  0  0  0  0  0  0  0  0  0  0  0
   -0.3551    1.8414    0.0000 C   0  0  0  0  0  0  0  0  0  0  0  0
   -1.1801    1.8414    0.0000 Cl  0  0  0  0  0  0  0  0  0  0  0  0
    0.0574    2.5559    0.0000 Cl  0  0  0  0  0  0  0  0  0  0  0  0
    0.7719    1.5395    0.0000 Cl  0  0  0  0  0  0  0  0  0  0  0  0
   -0.6571    0.7145    0.0000 Cl  0  0  0  0  0  0  0  0  0  0  0  0
    3.6662    1.9659    0.0000 H   0  0  0  0  0  0  0  0  0  0  0  0
    2.8916    1.9659    0.0000 H   0  0  0  0  0  0  0  0  0  0  0  0
    4.7079    1.2375    0.0000 H   0  0  0  0  0  0  0  0  0  0  0  0
    4.7079   -0.4125    0.0000 H   0  0  0  0  0  0  0  0  0  0  0  0
    3.6662   -1.1409    0.0000 H   0  0  0  0  0  0  0  0  0  0  0  0
    2.8916   -1.1409    0.0000 H   0  0  0  0  0  0  0  0  0  0  0  0
    2.4782   -0.8205    0.0000 H   0  0  0  0  0  0  0  0  0  0  0  0
    2.4782    1.6455    0.0000 H   0  0  0  0  0  0  0  0  0  0  0  0
   -0.7676    1.1270    0.0000 H   0  0  0  0  0  0  0  0  0  0  0  0
  1  2  1  0  0  0  0
  2  3  2  0  0  0  0
  3  4  1  0  0  0  0
  4  5  1  0  0  0  0
  5  6  1  0  0  0  0
  1  6  1  0  0  0  0
  6  7  1  0  0  0  0
  7  8  2  0  0  0  0
  7  9  1  0  0  0  0
  9 10  1  0  0  0  0
  5 10  1  0  0  0  0
 10 11  2  0  0  0  0
  9 12  1  0  0  0  0
 12 13  1  0  0  0  0
 13 14  1  0  0  0  0
 14 15  1  0  0  0  0
 14 16  1  0  0  0  0
 13 17  1  0  0  0  0
 13 18  1  0  0  0  0
  1 19  1  0  0  0  0
  1 20  1  0  0  0  0
  2 21  1  0  0  0  0
  3 22  1  0  0  0  0
  4 23  1  0  0  0  0
  4 24  1  0  0  0  0
  5 25  1  0  0  0  0
  6 26  1  0  0  0  0
 14 27  1  0  0  0  0
M  END
$$$$
5
  Mrv0541 12152312282D          

 27 28  0  0  0  0            999 V2000
    2.1434   -1.2375    0.0000 C   0  0  0  0  0  0  0  0  0  0  0  0
    2.8579   -1.6500    0.0000 C   0  0  0  0  0  0  0  0  0  0  0  0
    2.8579   -2.4750    0.0000 C   0  0  0  0  0  0  0  0  0  0  0  0
    2.1434   -2.8875    0.0000 C   0  0  0  0  0  0  0  0  0  0  0  0
    1.4289   -2.4750    0.0000 C   0  0  0  0  0  0  0  0  0  0  0  0
    1.4289   -1.6500    0.0000 C   0  0  0  0  0  0  0  0  0  0  0  0
    0.7145   -2.8875    0.0000 C   0  0  0  0  0  0  0  0  0  0  0  0
    0.0000   -2.4750    0.0000 C   0  0  0  0  0  0  0  0  0  0  0  0
   -0.7145   -2.8875    0.0000 C   0  0  0  0  0  0  0  0  0  0  0  0
   -1.4289   -2.4750    0.0000 C   0  0  0  0  0  0  0  0  0  0  0  0
   -1.4289   -1.6500    0.0000 C   0  0  0  0  0  0  0  0  0  0  0  0
   -0.7145   -1.2375    0.0000 C   0  0  0  0  0  0  0  0  0  0  0  0
    0.0000   -1.6500    0.0000 C   0  0  0  0  0  0  0  0  0  0  0  0
    0.7145   -1.2375    0.0000 O   0  0  0  0  0  0  0  0  0  0  0  0
    2.1434   -3.7125    0.0000 O   0  0  0  0  0  0  0  0  0  0  0  0
    2.1434   -0.4125    0.0000 H   0  0  0  0  0  0  0  0  0  0  0  0
    3.5724   -1.2375    0.0000 H   0  0  0  0  0  0  0  0  0  0  0  0
    3.5724   -2.8875    0.0000 H   0  0  0  0  0  0  0  0  0  0  0  0
    0.8986   -1.0180    0.0000 H   0  0  0  0  0  0  0  0  0  0  0  0
    1.1018   -3.6159    0.0000 H   0  0  0  0  0  0  0  0  0  0  0  0
    0.3272   -3.6159    0.0000 H   0  0  0  0  0  0  0  0  0  0  0  0
   -0.7145   -3.7125    0.0000 H   0  0  0  0  0  0  0  0  0  0  0  0
   -2.1434   -2.8875    0.0000 H   0  0  0  0  0  0  0  0  0  0  0  0
   -2.1434   -1.2375    0.0000 H   0  0  0  0  0  0  0  0  0  0  0  0
   -0.7145   -0.4125    0.0000 H   0  0  0  0  0  0  0  0  0  0  0  0
    1.5269   -1.3808    0.0000 H   0  0  0  0  0  0  0  0  0  0  0  0
    1.4289   -4.1250    0.0000 H   0  0  0  0  0  0  0  0  0  0  0  0
  1  2  4  0  0  0  0
  2  3  4  0  0  0  0
  3  4  4  0  0  0  0
  4  5  4  0  0  0  0
  5  6  4  0  0  0  0
  1  6  4  0  0  0  0
  5  7  1  0  0  0  0
  7  8  1  0  0  0  0
  8  9  4  0  0  0  0
  9 10  4  0  0  0  0
 10 11  4  0  0  0  0
 11 12  4  0  0  0  0
 12 13  4  0  0  0  0
  8 13  4  0  0  0  0
 13 14  1  0  0  0  0
  4 15  1  0  0  0  0
  1 16  1  0  0  0  0
  2 17  1  0  0  0  0
  3 18  1  0  0  0  0
  6 19  1  0  0  0  0
  7 20  1  0  0  0  0
  7 21  1  0  0  0  0
  9 22  1  0  0  0  0
 10 23  1  0  0  0  0
 11 24  1  0  0  0  0
 12 25  1  0  0  0  0
 14 26  1  0  0  0  0
 15 27  1  0  0  0  0
M  END
$$$$
6
  Mrv0541 12152312282D          

 65 69  0  0  0  0            999 V2000
   -7.3720    2.3438    0.0000 C   0  0  0  0  0  0  0  0  0  0  0  0
   -6.6576    2.7563    0.0000 C   0  0  0  0  0  0  0  0  0  0  0  0
   -5.9431    2.3438    0.0000 C   0  0  0  0  0  0  0  0  0  0  0  0
   -5.9431    1.5188    0.0000 C   0  0  0  0  0  0  0  0  0  0  0  0
   -6.6576    1.1063    0.0000 C   0  0  0  0  0  0  0  0  0  0  0  0
   -7.3720    1.5188    0.0000 C   0  0  0  0  0  0  0  0  0  0  0  0
   -5.2286    1.1063    0.0000 C   0  0  0  0  0  0  0  0  0  0  0  0
   -5.2286    0.2813    0.0000 O   0  0  0  0  0  0  0  0  0  0  0  0
   -4.5142    1.5188    0.0000 N   0  0  0  0  0  0  0  0  0  0  0  0
   -3.7997    1.1063    0.0000 C   0  0  0  0  0  0  0  0  0  0  0  0
   -3.0852    1.5188    0.0000 C   0  0  0  0  0  0  0  0  0  0  0  0
   -2.3707    1.1063    0.0000 C   0  0  0  0  0  0  0  0  0  0  0  0
   -1.6563    1.5188    0.0000 C   0  0  0  0  0  0  0  0  0  0  0  0
   -0.9418    1.1063    0.0000 C   0  0  0  0  0  0  0  0  0  0  0  0
   -0.9418    0.2813    0.0000 C   0  0  0  0  0  0  0  0  0  0  0  0
   -1.6563   -0.1312    0.0000 C   0  0  0  0  0  0  0  0  0  0  0  0
   -2.3707    0.2813    0.0000 C   0  0  0  0  0  0  0  0  0  0  0  0
   -3.0852   -0.1312    0.0000 C   0  0  0  0  0  0  0  0  0  0  0  0
   -3.7997    0.2813    0.0000 C   0  0  0  0  0  0  0  0  0  0  0  0
   -1.6563   -0.9562    0.0000 O   0  0  0  0  0  0  0  0  0  0  0  0
   -0.2273   -0.1312    0.0000 N   0  0  0  0  0  0  0  0  0  0  0  0
    0.4871    0.2813    0.0000 N   0  0  0  0  0  0  0  0  0  0  0  0
    1.2016   -0.1313    0.0000 C   0  0  0  0  0  0  0  0  0  0  0  0
    1.9161    0.2812    0.0000 C   0  0  0  0  0  0  0  0  0  0  0  0
    2.6306   -0.1313    0.0000 C   0  0  0  0  0  0  0  0  0  0  0  0
    2.6306   -0.9563    0.0000 C   0  0  0  0  0  0  0  0  0  0  0  0
    1.9161   -1.3688    0.0000 C   0  0  0  0  0  0  0  0  0  0  0  0
    1.2016   -0.9563    0.0000 C   0  0  0  0  0  0  0  0  0  0  0  0
    3.3450   -1.3688    0.0000 N   0  0  0  0  0  0  0  0  0  0  0  0
    4.0595   -0.9563    0.0000 N   0  0  0  0  0  0  0  0  0  0  0  0
    4.7740   -1.3688    0.0000 C   0  0  0  0  0  0  0  0  0  0  0  0
    5.4884   -0.9563    0.0000 C   0  0  0  0  0  0  0  0  0  0  0  0
    6.2029   -1.3688    0.0000 C   0  0  0  0  0  0  0  0  0  0  0  0
    6.2029   -2.1938    0.0000 C   0  0  0  0  0  0  0  0  0  0  0  0
    5.4884   -2.6063    0.0000 C   0  0  0  0  0  0  0  0  0  0  0  0
    4.7740   -2.1938    0.0000 C   0  0  0  0  0  0  0  0  0  0  0  0
    6.9174   -2.6063    0.0000 S   0  0  0  0  0  0  0  0  0  0  0  0
    7.6318   -3.0188    0.0000 O   0  0  0  0  0  0  0  0  0  0  0  0
    6.5049   -3.3207    0.0000 O   0  0  0  0  0  0  0  0  0  0  0  0
    7.3299   -1.8918    0.0000 O   0  0  0  0  0  0  0  0  0  0  0  0
   -0.2273    1.5188    0.0000 S   0  0  0  0  0  0  0  0  0  0  0  0
    0.4871    1.9312    0.0000 O   0  0  0  0  0  0  0  0  0  0  0  0
    0.1852    0.8043    0.0000 O   0  0  0  0  0  0  0  0  0  0  0  0
   -0.6398    2.2332    0.0000 O   0  0  0  0  0  0  0  0  0  0  0  0
   -8.0865    2.7563    0.0000 H   0  0  0  0  0  0  0  0  0  0  0  0
   -6.6576    3.5813    0.0000 H   0  0  0  0  0  0  0  0  0  0  0  0
   -5.2286    2.7563    0.0000 H   0  0  0  0  0  0  0  0  0  0  0  0
   -6.6576    0.2813    0.0000 H   0  0  0  0  0  0  0  0  0  0  0  0
   -8.0865    1.1063    0.0000 H   0  0  0  0  0  0  0  0  0  0  0  0
   -4.5142    2.3438    0.0000 H   0  0  0  0  0  0  0  0  0  0  0  0
   -3.0852    2.3438    0.0000 H   0  0  0  0  0  0  0  0  0  0  0  0
   -1.6563    2.3438    0.0000 H   0  0  0  0  0  0  0  0  0  0  0  0
   -3.0852   -0.9562    0.0000 H   0  0  0  0  0  0  0  0  0  0  0  0
   -4.5142   -0.1312    0.0000 H   0  0  0  0  0  0  0  0  0  0  0  0
   -2.3707   -1.3687    0.0000 H   0  0  0  0  0  0  0  0  0  0  0  0
    1.9161    1.1062    0.0000 H   0  0  0  0  0  0  0  0  0  0  0  0
    3.3450    0.2812    0.0000 H   0  0  0  0  0  0  0  0  0  0  0  0
    1.9161   -2.1938    0.0000 H   0  0  0  0  0  0  0  0  0  0  0  0
    0.4871   -1.3688    0.0000 H   0  0  0  0  0  0  0  0  0  0  0  0
    5.4884   -0.1313    0.0000 H   0  0  0  0  0  0  0  0  0  0  0  0
    6.9174   -0.9563    0.0000 H   0  0  0  0  0  0  0  0  0  0  0  0
    5.4884   -3.4313    0.0000 H   0  0  0  0  0  0  0  0  0  0  0  0
    4.0595   -2.6063    0.0000 H   0  0  0  0  0  0  0  0  0  0  0  0
    8.1549   -1.8918    0.0000 H   0  0  0  0  0  0  0  0  0  0  0  0
   -0.2273    2.9477    0.0000 H   0  0  0  0  0  0  0  0  0  0  0  0
  1  2  4  0  0  0  0
  2  3  4  0  0  0  0
  3  4  4  0  0  0  0
  4  5  4  0  0  0  0
  5  6  4  0  0  0  0
  1  6  4  0  0  0  0
  4  7  1  0  0  0  0
  7  8  2  0  0  0  0
  7  9  1  0  0  0  0
  9 10  1  0  0  0  0
 10 11  4  0  0  0  0
 11 12  4  0  0  0  0
 12 13  4  0  0  0  0
 13 14  4  0  0  0  0
 14 15  4  0  0  0  0
 15 16  4  0  0  0  0
 16 17  4  0  0  0  0
 12 17  4  0  0  0  0
 17 18  4  0  0  0  0
 18 19  4  0  0  0  0
 10 19  4  0  0  0  0
 16 20  1  0  0  0  0
 21 15  1  4  0  0  0
 21 22  2  0  0  0  0
 22 23  1  0  0  0  0
 23 24  4  0  0  0  0
 24 25  4  0  0  0  0
 25 26  4  0  0  0  0
 26 27  4  0  0  0  0
 27 28  4  0  0  0  0
 23 28  4  0  0  0  0
 29 26  1  4  0  0  0
 29 30  2  0  0  0  0
 30 31  1  0  0  0  0
 31 32  4  0  0  0  0
 32 33  4  0  0  0  0
 33 34  4  0  0  0  0
 34 35  4  0  0  0  0
 35 36  4  0  0  0  0
 31 36  4  0  0  0  0
 34 37  1  0  0  0  0
 37 38  2  0  0  0  0
 37 39  2  0  0  0  0
 37 40  1  0  0  0  0
 14 41  1  0  0  0  0
 41 42  2  0  0  0  0
 41 43  2  0  0  0  0
 41 44  1  0  0  0  0
  1 45  1  0  0  0  0
  2 46  1  0  0  0  0
  3 47  1  0  0  0  0
  5 48  1  0  0  0  0
  6 49  1  0  0  0  0
  9 50  1  0  0  0  0
 11 51  1  0  0  0  0
 13 52  1  0  0  0  0
 18 53  1  0  0  0  0
 19 54  1  0  0  0  0
 20 55  1  0  0  0  0
 24 56  1  0  0  0  0
 25 57  1  0  0  0  0
 27 58  1  0  0  0  0
 28 59  1  0  0  0  0
 32 60  1  0  0  0  0
 33 61  1  0  0  0  0
 35 62  1  0  0  0  0
 36 63  1  0  0  0  0
 40 64  1  0  0  0  0
 44 65  1  0  0  0  0
M  END
$$$$
7
  Mrv0541 12152312282D          

 20 20  0  0  0  0            999 V2000
    0.5678    1.1143    0.0000 C   0  0  0  0  0  0  0  0  0  0  0  0
    1.2352    0.6294    0.0000 C   0  0  0  0  0  0  0  0  0  0  0  0
    0.9803   -0.1553    0.0000 C   0  0  0  0  0  0  0  0  0  0  0  0
    1.4652   -0.8227    0.0000 O   0  0  0  0  0  0  0  0  0  0  0  0
    0.1553   -0.1553    0.0000 N   0  0  0  0  0  0  0  0  0  0  0  0
   -0.0997    0.6294    0.0000 C   0  0  0  0  0  0  0  0  0  0  0  0
   -0.3297   -0.8227    0.0000 C   0  0  0  0  0  0  0  0  0  0  0  0
   -1.1501   -0.7365    0.0000 C   0  0  0  0  0  0  0  0  0  0  0  0
   -1.6351   -1.4039    0.0000 O   0  0  0  0  0  0  0  0  0  0  0  0
    0.9728    1.8330    0.0000 H   0  0  0  0  0  0  0  0  0  0  0  0
    0.1628    1.8330    0.0000 H   0  0  0  0  0  0  0  0  0  0  0  0
    1.7936    1.2366    0.0000 H   0  0  0  0  0  0  0  0  0  0  0  0
    2.0439    0.4663    0.0000 H   0  0  0  0  0  0  0  0  0  0  0  0
   -0.9084    0.4663    0.0000 H   0  0  0  0  0  0  0  0  0  0  0  0
   -0.6581    1.2366    0.0000 H   0  0  0  0  0  0  0  0  0  0  0  0
    0.3204   -1.3306    0.0000 H   0  0  0  0  0  0  0  0  0  0  0  0
   -0.3872   -1.6457    0.0000 H   0  0  0  0  0  0  0  0  0  0  0  0
   -1.0926    0.0865    0.0000 H   0  0  0  0  0  0  0  0  0  0  0  0
   -1.8003   -0.2285    0.0000 H   0  0  0  0  0  0  0  0  0  0  0  0
   -2.4555   -1.3177    0.0000 H   0  0  0  0  0  0  0  0  0  0  0  0
  1  2  1  0  0  0  0
  2  3  1  0  0  0  0
  3  4  2  0  0  0  0
  3  5  1  0  0  0  0
  5  6  1  0  0  0  0
  1  6  1  0  0  0  0
  5  7  1  0  0  0  0
  7  8  1  0  0  0  0
  8  9  1  0  0  0  0
  1 10  1  0  0  0  0
  1 11  1  0  0  0  0
  2 12  1  0  0  0  0
  2 13  1  0  0  0  0
  6 14  1  0  0  0  0
  6 15  1  0  0  0  0
  7 16  1  0  0  0  0
  7 17  1  0  0  0  0
  8 18  1  0  0  0  0
  8 19  1  0  0  0  0
  9 20  1  0  0  0  0
M  END
$$$$
8
  Mrv0541 12152312282D          

 54 55  0  0  0  0            999 V2000
   -2.3645    3.7125    0.0000 C   0  0  0  0  0  0  0  0  0  0  0  0
   -2.3645    2.8875    0.0000 C   0  0  0  0  0  0  0  0  0  0  0  0
   -3.0789    2.4750    0.0000 C   0  0  0  0  0  0  0  0  0  0  0  0
   -1.6500    2.4750    0.0000 N   0  0  0  0  0  0  0  0  0  0  0  0
   -1.6500    1.6500    0.0000 C   0  0  0  0  0  0  0  0  0  0  0  0
   -0.9355    1.2375    0.0000 C   0  0  0  0  0  0  0  0  0  0  0  0
   -0.9355    0.4125    0.0000 C   0  0  0  0  0  0  0  0  0  0  0  0
   -0.9355   -0.4125    0.0000 C   0  0  0  0  0  0  0  0  0  0  0  0
   -0.2211   -0.8250    0.0000 C   0  0  0  0  0  0  0  0  0  0  0  0
   -0.2211   -1.6500    0.0000 C   0  0  0  0  0  0  0  0  0  0  0  0
   -0.9355   -2.0625    0.0000 C   0  0  0  0  0  0  0  0  0  0  0  0
   -1.6500   -1.6500    0.0000 C   0  0  0  0  0  0  0  0  0  0  0  0
   -1.6500   -0.8250    0.0000 C   0  0  0  0  0  0  0  0  0  0  0  0
   -1.7605    0.4125    0.0000 C   0  0  0  0  0  0  0  0  0  0  0  0
   -2.1730   -0.3020    0.0000 C   0  0  0  0  0  0  0  0  0  0  0  0
   -2.9980   -0.3020    0.0000 C   0  0  0  0  0  0  0  0  0  0  0  0
   -3.4105    0.4125    0.0000 C   0  0  0  0  0  0  0  0  0  0  0  0
   -2.9980    1.1270    0.0000 C   0  0  0  0  0  0  0  0  0  0  0  0
   -2.1730    1.1270    0.0000 N   0  0  0  0  0  0  0  0  0  0  0  0
   -0.1105    0.4125    0.0000 C   0  0  0  0  0  0  0  0  0  0  0  0
    0.3020   -0.3020    0.0000 O   0  0  0  0  0  0  0  0  0  0  0  0
    0.3020    1.1270    0.0000 N   0  0  0  0  0  0  0  0  0  0  0  0
   -0.9355    2.8875    0.0000 C   0  0  0  0  0  0  0  0  0  0  0  0
   -0.2211    2.4750    0.0000 C   0  0  0  0  0  0  0  0  0  0  0  0
   -0.9355    3.7125    0.0000 C   0  0  0  0  0  0  0  0  0  0  0  0
   -1.5892    3.9947    0.0000 H   0  0  0  0  0  0  0  0  0  0  0  0
   -2.3645    4.5375    0.0000 H   0  0  0  0  0  0  0  0  0  0  0  0
   -3.1895    3.7125    0.0000 H   0  0  0  0  0  0  0  0  0  0  0  0
   -3.0789    3.3000    0.0000 H   0  0  0  0  0  0  0  0  0  0  0  0
   -3.4914    3.1895    0.0000 H   0  0  0  0  0  0  0  0  0  0  0  0
   -3.7934    2.0625    0.0000 H   0  0  0  0  0  0  0  0  0  0  0  0
   -2.4470    1.9447    0.0000 H   0  0  0  0  0  0  0  0  0  0  0  0
   -2.4149    1.3409    0.0000 H   0  0  0  0  0  0  0  0  0  0  0  0
   -1.8215    0.8430    0.0000 H   0  0  0  0  0  0  0  0  0  0  0  0
   -0.4983    1.9371    0.0000 H   0  0  0  0  0  0  0  0  0  0  0  0
   -0.1110    1.2663    0.0000 H   0  0  0  0  0  0  0  0  0  0  0  0
    0.5914   -0.6817    0.0000 H   0  0  0  0  0  0  0  0  0  0  0  0
    0.4934   -2.0625    0.0000 H   0  0  0  0  0  0  0  0  0  0  0  0
   -0.9355   -2.8875    0.0000 H   0  0  0  0  0  0  0  0  0  0  0  0
   -2.3645   -2.0625    0.0000 H   0  0  0  0  0  0  0  0  0  0  0  0
   -2.3645   -0.4125    0.0000 H   0  0  0  0  0  0  0  0  0  0  0  0
   -2.0298   -1.1144    0.0000 H   0  0  0  0  0  0  0  0  0  0  0  0
   -3.4105   -1.0164    0.0000 H   0  0  0  0  0  0  0  0  0  0  0  0
   -4.2355    0.4125    0.0000 H   0  0  0  0  0  0  0  0  0  0  0  0
   -3.4105    1.8414    0.0000 H   0  0  0  0  0  0  0  0  0  0  0  0
    1.1270    1.1270    0.0000 H   0  0  0  0  0  0  0  0  0  0  0  0
   -0.1105    1.8414    0.0000 H   0  0  0  0  0  0  0  0  0  0  0  0
   -0.4052    2.2555    0.0000 H   0  0  0  0  0  0  0  0  0  0  0  0
   -0.3643    1.6625    0.0000 H   0  0  0  0  0  0  0  0  0  0  0  0
    0.4934    2.0625    0.0000 H   0  0  0  0  0  0  0  0  0  0  0  0
    0.1914    3.1895    0.0000 H   0  0  0  0  0  0  0  0  0  0  0  0
   -0.1105    3.7125    0.0000 H   0  0  0  0  0  0  0  0  0  0  0  0
   -0.9355    4.5375    0.0000 H   0  0  0  0  0  0  0  0  0  0  0  0
   -1.7108    3.4303    0.0000 H   0  0  0  0  0  0  0  0  0  0  0  0
  1  2  1  0  0  0  0
  2  3  1  0  0  0  0
  2  4  1  0  0  0  0
  4  5  1  0  0  0  0
  5  6  1  0  0  0  0
  6  7  1  0  0  0  0
  7  8  1  0  0  0  0
  8  9  4  0  0  0  0
  9 10  4  0  0  0  0
 10 11  4  0  0  0  0
 11 12  4  0  0  0  0
 12 13  4  0  0  0  0
  8 13  4  0  0  0  0
  7 14  1  0  0  0  0
 14 15  4  0  0  0  0
 15 16  4  0  0  0  0
 16 17  4  0  0  0  0
 17 18  4  0  0  0  0
 18 19  4  0  0  0  0
 14 19  4  0  0  0  0
  7 20  1  0  0  0  0
 20 21  2  0  0  0  0
 20 22  1  0  0  0  0
  4 23  1  0  0  0  0
 23 24  1  0  0  0  0
 23 25  1  0  0  0  0
  1 26  1  0  0  0  0
  1 27  1  0  0  0  0
  1 28  1  0  0  0  0
  2 29  1  0  0  0  0
  3 30  1  0  0  0  0
  3 31  1  0  0  0  0
  3 32  1  0  0  0  0
  5 33  1  0  0  0  0
  5 34  1  0  0  0  0
  6 35  1  0  0  0  0
  6 36  1  0  0  0  0
  9 37  1  0  0  0  0
 10 38  1  0  0  0  0
 11 39  1  0  0  0  0
 12 40  1  0  0  0  0
 13 41  1  0  0  0  0
 15 42  1  0  0  0  0
 16 43  1  0  0  0  0
 17 44  1  0  0  0  0
 18 45  1  0  0  0  0
 22 46  1  0  0  0  0
 22 47  1  0  0  0  0
 23 48  1  0  0  0  0
 24 49  1  0  0  0  0
 24 50  1  0  0  0  0
 24 51  1  0  0  0  0
 25 52  1  0  0  0  0
 25 53  1  0  0  0  0
 25 54  1  0  0  0  0
M  END
$$$$
9
  Mrv0541 12152312282D          

 39 38  0  0  0  0            999 V2000
    4.2355    3.2704    0.0000 C   0  0  0  0  0  0  0  0  0  0  0  0
    4.9500    2.8579    0.0000 C   0  0  0  0  0  0  0  0  0  0  0  0
    5.6645    3.2704    0.0000 C   0  0  0  0  0  0  0  0  0  0  0  0
    6.3789    2.8579    0.0000 C   0  0  0  0  0  0  0  0  0  0  0  0
    7.0934    3.2704    0.0000 C   0  0  0  0  0  0  0  0  0  0  0  0
    7.8079    2.8579    0.0000 C   0  0  0  0  0  0  0  0  0  0  0  0
    8.5224    3.2704    0.0000 C   0  0  0  0  0  0  0  0  0  0  0  0
    9.2368    2.8579    0.0000 C   0  0  0  0  0  0  0  0  0  0  0  0
    9.9513    3.2704    0.0000 C   0  0  0  0  0  0  0  0  0  0  0  0
   10.6658    2.8579    0.0000 C   0  0  0  0  0  0  0  0  0  0  0  0
   11.3802    3.2704    0.0000 C   0  0  0  0  0  0  0  0  0  0  0  0
    8.5224    4.0954    0.0000 C   0  0  0  0  0  0  0  0  0  0  0  0
    9.2368    4.5079    0.0000 O   0  0  0  0  0  0  0  0  0  0  0  0
    4.6480    3.9849    0.0000 H   0  0  0  0  0  0  0  0  0  0  0  0
    3.5211    3.6829    0.0000 H   0  0  0  0  0  0  0  0  0  0  0  0
    3.8230    2.5559    0.0000 H   0  0  0  0  0  0  0  0  0  0  0  0
    4.5627    2.1295    0.0000 H   0  0  0  0  0  0  0  0  0  0  0  0
    5.3373    2.1295    0.0000 H   0  0  0  0  0  0  0  0  0  0  0  0
    5.2772    3.9988    0.0000 H   0  0  0  0  0  0  0  0  0  0  0  0
    6.0518    3.9988    0.0000 H   0  0  0  0  0  0  0  0  0  0  0  0
    5.9916    2.1295    0.0000 H   0  0  0  0  0  0  0  0  0  0  0  0
    6.7663    2.1295    0.0000 H   0  0  0  0  0  0  0  0  0  0  0  0
    6.7061    3.9988    0.0000 H   0  0  0  0  0  0  0  0  0  0  0  0
    7.2082    4.0874    0.0000 H   0  0  0  0  0  0  0  0  0  0  0  0
    7.4206    2.1295    0.0000 H   0  0  0  0  0  0  0  0  0  0  0  0
    8.1952    2.1295    0.0000 H   0  0  0  0  0  0  0  0  0  0  0  0
    8.5224    2.4454    0.0000 H   0  0  0  0  0  0  0  0  0  0  0  0
    8.8495    2.1295    0.0000 H   0  0  0  0  0  0  0  0  0  0  0  0
    9.6241    2.1295    0.0000 H   0  0  0  0  0  0  0  0  0  0  0  0
    9.5640    3.9988    0.0000 H   0  0  0  0  0  0  0  0  0  0  0  0
   10.3386    3.9988    0.0000 H   0  0  0  0  0  0  0  0  0  0  0  0
   10.2785    2.1295    0.0000 H   0  0  0  0  0  0  0  0  0  0  0  0
   11.0531    2.1295    0.0000 H   0  0  0  0  0  0  0  0  0  0  0  0
   11.7927    2.5559    0.0000 H   0  0  0  0  0  0  0  0  0  0  0  0
   12.0947    3.6829    0.0000 H   0  0  0  0  0  0  0  0  0  0  0  0
   10.9677    3.9849    0.0000 H   0  0  0  0  0  0  0  0  0  0  0  0
    7.7574    4.4044    0.0000 H   0  0  0  0  0  0  0  0  0  0  0  0
    8.0852    4.7950    0.0000 H   0  0  0  0  0  0  0  0  0  0  0  0
    9.9513    4.0954    0.0000 H   0  0  0  0  0  0  0  0  0  0  0  0
  1  2  1  0  0  0  0
  2  3  1  0  0  0  0
  3  4  1  0  0  0  0
  4  5  1  0  0  0  0
  5  6  1  0  0  0  0
  6  7  1  0  0  0  0
  7  8  1  0  0  0  0
  8  9  1  0  0  0  0
  9 10  1  0  0  0  0
 10 11  1  0  0  0  0
  7 12  1  0  0  0  0
 12 13  1  0  0  0  0
  1 14  1  0  0  0  0
  1 15  1  0  0  0  0
  1 16  1  0  0  0  0
  2 17  1  0  0  0  0
  2 18  1  0  0  0  0
  3 19  1  0  0  0  0
  3 20  1  0  0  0  0
  4 21  1  0  0  0  0
  4 22  1  0  0  0  0
  5 23  1  0  0  0  0
  5 24  1  0  0  0  0
  6 25  1  0  0  0  0
  6 26  1  0  0  0  0
  7 27  1  0  0  0  0
  8 28  1  0  0  0  0
  8 29  1  0  0  0  0
  9 30  1  0  0  0  0
  9 31  1  0  0  0  0
 10 32  1  0  0  0  0
 10 33  1  0  0  0  0
 11 34  1  0  0  0  0
 11 35  1  0  0  0  0
 11 36  1  0  0  0  0
 12 37  1  0  0  0  0
 12 38  1  0  0  0  0
 13 39  1  0  0  0  0
M  END
$$$$
10
  Mrv0541 12152312282D          

 40 41  0  0  1  0            999 V2000
    4.2868    0.0000    0.0000 C   0  0  0  0  0  0  0  0  0  0  0  0
    5.0013    0.4125    0.0000 C   0  0  0  0  0  0  0  0  0  0  0  0
    5.0013    1.2375    0.0000 C   0  0  0  0  0  0  0  0  0  0  0  0
    5.7158    0.0000    0.0000 N   0  0  0  0  0  0  0  0  0  0  0  0
    6.4302    0.4125    0.0000 C   0  0  0  0  0  0  0  0  0  0  0  0
    7.1447    0.0000    0.0000 C   0  0  1  0  0  0  0  0  0  0  0  0
    7.8592    0.4125    0.0000 C   0  0  0  0  0  0  0  0  0  0  0  0
    8.5737    0.0000    0.0000 O   0  0  0  0  0  0  0  0  0  0  0  0
    9.2881    0.4125    0.0000 C   0  0  0  0  0  0  0  0  0  0  0  0
    9.2881    1.2375    0.0000 C   0  0  0  0  0  0  0  0  0  0  0  0
   10.0026    1.6500    0.0000 C   0  0  0  0  0  0  0  0  0  0  0  0
   10.7171    1.2375    0.0000 C   0  0  0  0  0  0  0  0  0  0  0  0
   10.7171    0.4125    0.0000 C   0  0  0  0  0  0  0  0  0  0  0  0
   11.4315    0.0000    0.0000 C   0  0  0  0  0  0  0  0  0  0  0  0
   11.4315   -0.8250    0.0000 C   0  0  0  0  0  0  0  0  0  0  0  0
   10.7171   -1.2375    0.0000 C   0  0  0  0  0  0  0  0  0  0  0  0
   10.0026   -0.8250    0.0000 C   0  0  0  0  0  0  0  0  0  0  0  0
   10.0026    0.0000    0.0000 C   0  0  0  0  0  0  0  0  0  0  0  0
    7.1447   -0.8250    0.0000 O   0  0  0  0  0  0  0  0  0  0  0  0
    3.8743    0.7145    0.0000 H   0  0  0  0  0  0  0  0  0  0  0  0
    3.5724   -0.4125    0.0000 H   0  0  0  0  0  0  0  0  0  0  0  0
    4.6993   -0.7145    0.0000 H   0  0  0  0  0  0  0  0  0  0  0  0
    4.2868    0.8250    0.0000 H   0  0  0  0  0  0  0  0  0  0  0  0
    5.7765    1.5197    0.0000 H   0  0  0  0  0  0  0  0  0  0  0  0
    5.0013    2.0625    0.0000 H   0  0  0  0  0  0  0  0  0  0  0  0
    4.1763    1.2375    0.0000 H   0  0  0  0  0  0  0  0  0  0  0  0
    5.7158   -0.8250    0.0000 H   0  0  0  0  0  0  0  0  0  0  0  0
    6.3154    1.2295    0.0000 H   0  0  0  0  0  0  0  0  0  0  0  0
    6.8176    1.1409    0.0000 H   0  0  0  0  0  0  0  0  0  0  0  0
    7.1447    0.8250    0.0000 H   0  0  0  0  0  0  0  0  0  0  0  0
    7.4719    1.1409    0.0000 H   0  0  0  0  0  0  0  0  0  0  0  0
    8.2465    1.1409    0.0000 H   0  0  0  0  0  0  0  0  0  0  0  0
    8.5737    1.6500    0.0000 H   0  0  0  0  0  0  0  0  0  0  0  0
   10.0026    2.4750    0.0000 H   0  0  0  0  0  0  0  0  0  0  0  0
   11.4315    1.6500    0.0000 H   0  0  0  0  0  0  0  0  0  0  0  0
   12.1460    0.4125    0.0000 H   0  0  0  0  0  0  0  0  0  0  0  0
   12.1460   -1.2375    0.0000 H   0  0  0  0  0  0  0  0  0  0  0  0
   10.7171   -2.0625    0.0000 H   0  0  0  0  0  0  0  0  0  0  0  0
    9.2881   -1.2375    0.0000 H   0  0  0  0  0  0  0  0  0  0  0  0
    6.4302   -1.2375    0.0000 H   0  0  0  0  0  0  0  0  0  0  0  0
  1  2  1  0  0  0  0
  2  3  1  0  0  0  0
  2  4  1  0  0  0  0
  4  5  1  0  0  0  0
  5  6  1  0  0  0  0
  6  7  1  0  0  0  0
  7  8  1  0  0  0  0
  8  9  1  0  0  0  0
  9 10  4  0  0  0  0
 10 11  4  0  0  0  0
 11 12  4  0  0  0  0
 12 13  4  0  0  0  0
 13 14  4  0  0  0  0
 14 15  4  0  0  0  0
 15 16  4  0  0  0  0
 16 17  4  0  0  0  0
 17 18  4  0  0  0  0
 13 18  4  0  0  0  0
  9 18  4  0  0  0  0
  6 19  1  6  0  0  0
  1 20  1  0  0  0  0
  1 21  1  0  0  0  0
  1 22  1  0  0  0  0
  2 23  1  0  0  0  0
  3 24  1  0  0  0  0
  3 25  1  0  0  0  0
  3 26  1  0  0  0  0
  4 27  1  0  0  0  0
  5 28  1  0  0  0  0
  5 29  1  0  0  0  0
  6 30  1  6  0  0  0
  7 31  1  0  0  0  0
  7 32  1  0  0  0  0
 10 33  1  0  0  0  0
 11 34  1  0  0  0  0
 12 35  1  0  0  0  0
 14 36  1  0  0  0  0
 15 37  1  0  0  0  0
 16 38  1  0  0  0  0
 17 39  1  0  0  0  0
 19 40  1  0  0  0  0
M  END
$$$$
11
  Mrv0541 12152312282D          

 18 18  0  0  0  0            999 V2000
    0.0000    2.4750    0.0000 C   0  0  0  0  0  0  0  0  0  0  0  0
    0.7145    2.0625    0.0000 C   0  0  0  0  0  0  0  0  0  0  0  0
    0.7145    1.2375    0.0000 C   0  0  0  0  0  0  0  0  0  0  0  0
    1.4289    0.8250    0.0000 C   0  0  0  0  0  0  0  0  0  0  0  0
    1.4289   -0.0000    0.0000 C   0  0  0  0  0  0  0  0  0  0  0  0
    2.1434   -0.4125    0.0000 O   0  0  0  0  0  0  0  0  0  0  0  0
    0.7145   -0.4125    0.0000 C   0  0  0  0  0  0  0  0  0  0  0  0
    0.0000    0.0000    0.0000 C   0  0  0  0  0  0  0  0  0  0  0  0
    0.0000    0.8250    0.0000 O   0  0  0  0  0  0  0  0  0  0  0  0
    2.1434    1.2375    0.0000 O   0  0  0  0  0  0  0  0  0  0  0  0
    0.4125    3.1895    0.0000 H   0  0  0  0  0  0  0  0  0  0  0  0
   -0.7145    2.8875    0.0000 H   0  0  0  0  0  0  0  0  0  0  0  0
   -0.4125    1.7605    0.0000 H   0  0  0  0  0  0  0  0  0  0  0  0
    1.1517    2.7621    0.0000 H   0  0  0  0  0  0  0  0  0  0  0  0
    1.5390    2.0913    0.0000 H   0  0  0  0  0  0  0  0  0  0  0  0
    0.7145   -1.2375    0.0000 H   0  0  0  0  0  0  0  0  0  0  0  0
   -0.7145   -0.4125    0.0000 H   0  0  0  0  0  0  0  0  0  0  0  0
    2.8579    0.8250    0.0000 H   0  0  0  0  0  0  0  0  0  0  0  0
  1  2  1  0  0  0  0
  2  3  1  0  0  0  0
  3  4  2  0  0  0  0
  4  5  1  0  0  0  0
  5  6  2  0  0  0  0
  5  7  1  0  0  0  0
  7  8  2  0  0  0  0
  8  9  1  0  0  0  0
  3  9  1  0  0  0  0
  4 10  1  0  0  0  0
  1 11  1  0  0  0  0
  1 12  1  0  0  0  0
  1 13  1  0  0  0  0
  2 14  1  0  0  0  0
  2 15  1  0  0  0  0
  7 16  1  0  0  0  0
  8 17  1  0  0  0  0
 10 18  1  0  0  0  0
M  END
$$$$
12
  Mrv0541 12152312282D          

 35 36  0  0  1  0            999 V2000
   -0.7145   -1.2375    0.0000 C   0  0  0  0  0  0  0  0  0  0  0  0
    0.0000   -1.6500    0.0000 C   0  0  0  0  0  0  0  0  0  0  0  0
    0.0000   -2.4750    0.0000 C   0  0  0  0  0  0  0  0  0  0  0  0
   -0.7145   -2.8875    0.0000 C   0  0  0  0  0  0  0  0  0  0  0  0
   -1.4289   -2.4750    0.0000 C   0  0  0  0  0  0  0  0  0  0  0  0
   -1.4289   -1.6500    0.0000 C   0  0  0  0  0  0  0  0  0  0  0  0
   -2.1434   -1.2375    0.0000 O   0  0  0  0  0  0  0  0  0  0  0  0
   -2.8579   -1.6500    0.0000 C   0  0  0  0  0  0  0  0  0  0  0  0
   -2.8579   -2.4750    0.0000 C   0  0  0  0  0  0  0  0  0  0  0  0
   -3.5724   -2.8875    0.0000 C   0  0  0  0  0  0  0  0  0  0  0  0
   -4.2868   -2.4750    0.0000 C   0  0  0  0  0  0  0  0  0  0  0  0
   -4.2868   -1.6500    0.0000 C   0  0  0  0  0  0  0  0  0  0  0  0
   -3.5724   -1.2375    0.0000 C   0  0  0  0  0  0  0  0  0  0  0  0
   -3.5724   -0.4125    0.0000 I   0  0  0  0  0  0  0  0  0  0  0  0
   -5.0013   -2.8875    0.0000 C   0  0  0  0  0  0  0  0  0  0  0  0
   -5.7158   -2.4750    0.0000 C   0  0  1  0  0  0  0  0  0  0  0  0
   -6.4302   -2.8875    0.0000 C   0  0  0  0  0  0  0  0  0  0  0  0
   -7.1447   -2.4750    0.0000 O   0  0  0  0  0  0  0  0  0  0  0  0
   -6.4302   -3.7125    0.0000 O   0  0  0  0  0  0  0  0  0  0  0  0
   -5.7158   -1.6500    0.0000 N   0  0  0  0  0  0  0  0  0  0  0  0
   -2.1434   -2.8875    0.0000 I   0  0  0  0  0  0  0  0  0  0  0  0
   -0.7145   -3.7125    0.0000 I   0  0  0  0  0  0  0  0  0  0  0  0
    0.7145   -2.8875    0.0000 O   0  0  0  0  0  0  0  0  0  0  0  0
   -0.7145   -0.4125    0.0000 H   0  0  0  0  0  0  0  0  0  0  0  0
    0.7145   -1.2375    0.0000 H   0  0  0  0  0  0  0  0  0  0  0  0
   -2.2414   -2.6183    0.0000 H   0  0  0  0  0  0  0  0  0  0  0  0
   -3.5724   -3.7125    0.0000 H   0  0  0  0  0  0  0  0  0  0  0  0
   -5.0993   -1.5067    0.0000 H   0  0  0  0  0  0  0  0  0  0  0  0
   -4.6140   -3.6159    0.0000 H   0  0  0  0  0  0  0  0  0  0  0  0
   -5.3886   -3.6159    0.0000 H   0  0  0  0  0  0  0  0  0  0  0  0
   -5.7158   -3.3000    0.0000 H   0  0  0  0  0  0  0  0  0  0  0  0
   -7.1447   -4.1250    0.0000 H   0  0  0  0  0  0  0  0  0  0  0  0
   -5.1855   -1.0180    0.0000 H   0  0  0  0  0  0  0  0  0  0  0  0
   -6.4302   -1.2375    0.0000 H   0  0  0  0  0  0  0  0  0  0  0  0
    0.7145   -3.7125    0.0000 H   0  0  0  0  0  0  0  0  0  0  0  0
  1  2  4  0  0  0  0
  2  3  4  0  0  0  0
  3  4  4  0  0  0  0
  4  5  4  0  0  0  0
  5  6  4  0  0  0  0
  1  6  4  0  0  0  0
  6  7  1  0  0  0  0
  7  8  1  0  0  0  0
  8  9  4  0  0  0  0
  9 10  4  0  0  0  0
 10 11  4  0  0  0  0
 11 12  4  0  0  0  0
 12 13  4  0  0  0  0
  8 13  4  0  0  0  0
 13 14  1  0  0  0  0
 11 15  1  0  0  0  0
 15 16  1  0  0  0  0
 16 17  1  0  0  0  0
 17 18  2  0  0  0  0
 17 19  1  0  0  0  0
 16 20  1  6  0  0  0
  9 21  1  0  0  0  0
  4 22  1  0  0  0  0
  3 23  1  0  0  0  0
  1 24  1  0  0  0  0
  2 25  1  0  0  0  0
  5 26  1  0  0  0  0
 10 27  1  0  0  0  0
 12 28  1  0  0  0  0
 15 29  1  0  0  0  0
 15 30  1  0  0  0  0
 16 31  1  6  0  0  0
 19 32  1  0  0  0  0
 20 33  1  0  0  0  0
 20 34  1  0  0  0  0
 23 35  1  0  0  0  0
M  END
$$$$
13
  Mrv0541 12152312282D          

 14 14  0  0  0  0            999 V2000
    0.7145    1.2375    0.0000 C   0  0  0  0  0  0  0  0  0  0  0  0
    1.4289    0.8250    0.0000 C   0  0  0  0  0  0  0  0  0  0  0  0
    1.4289   -0.0000    0.0000 C   0  0  0  0  0  0  0  0  0  0  0  0
    0.7145   -0.4125    0.0000 C   0  0  0  0  0  0  0  0  0  0  0  0
    0.0000    0.0000    0.0000 C   0  0  0  0  0  0  0  0  0  0  0  0
    0.0000    0.8250    0.0000 C   0  0  0  0  0  0  0  0  0  0  0  0
   -0.7145    1.2375    0.0000 N   0  3  0  0  0  0  0  0  0  0  0  0
   -1.4289    0.8250    0.0000 O   0  0  0  0  0  0  0  0  0  0  0  0
   -0.7145    2.0625    0.0000 O   0  5  0  0  0  0  0  0  0  0  0  0
    2.1434   -0.4125    0.0000 Cl  0  0  0  0  0  0  0  0  0  0  0  0
    0.7145    2.0625    0.0000 H   0  0  0  0  0  0  0  0  0  0  0  0
    2.1434    1.2375    0.0000 H   0  0  0  0  0  0  0  0  0  0  0  0
    0.7145   -1.2375    0.0000 H   0  0  0  0  0  0  0  0  0  0  0  0
   -0.7145   -0.4125    0.0000 H   0  0  0  0  0  0  0  0  0  0  0  0
  1  2  4  0  0  0  0
  2  3  4  0  0  0  0
  3  4  4  0  0  0  0
  4  5  4  0  0  0  0
  5  6  4  0  0  0  0
  1  6  4  0  0  0  0
  6  7  1  0  0  0  0
  7  8  2  0  0  0  0
  7  9  1  0  0  0  0
  3 10  1  0  0  0  0
  1 11  1  0  0  0  0
  2 12  1  0  0  0  0
  4 13  1  0  0  0  0
  5 14  1  0  0  0  0
M  CHG  2   7   1   9  -1
M  END
$$$$
14
  Mrv0541 12152312282D          

 16 16  0  0  0  0            999 V2000
    0.7145    1.2375    0.0000 C   0  0  0  0  0  0  0  0  0  0  0  0
    1.4289    0.8250    0.0000 C   0  0  0  0  0  0  0  0  0  0  0  0
    1.4289   -0.0000    0.0000 C   0  0  0  0  0  0  0  0  0  0  0  0
    0.7145   -0.4125    0.0000 C   0  0  0  0  0  0  0  0  0  0  0  0
    0.0000    0.0000    0.0000 C   0  0  0  0  0  0  0  0  0  0  0  0
    0.0000    0.8250    0.0000 C   0  0  0  0  0  0  0  0  0  0  0  0
   -0.7145    1.2375    0.0000 N   0  0  0  0  0  0  0  0  0  0  0  0
    2.1434   -0.4125    0.0000 N   0  3  0  0  0  0  0  0  0  0  0  0
    2.8579   -0.0000    0.0000 O   0  0  0  0  0  0  0  0  0  0  0  0
    2.1434   -1.2375    0.0000 O   0  5  0  0  0  0  0  0  0  0  0  0
    0.7145    2.0625    0.0000 H   0  0  0  0  0  0  0  0  0  0  0  0
    2.1434    1.2375    0.0000 H   0  0  0  0  0  0  0  0  0  0  0  0
    0.7145   -1.2375    0.0000 H   0  0  0  0  0  0  0  0  0  0  0  0
   -0.7145   -0.4125    0.0000 H   0  0  0  0  0  0  0  0  0  0  0  0
   -0.7145    2.0625    0.0000 H   0  0  0  0  0  0  0  0  0  0  0  0
   -1.4289    0.8250    0.0000 H   0  0  0  0  0  0  0  0  0  0  0  0
  1  2  4  0  0  0  0
  2  3  4  0  0  0  0
  3  4  4  0  0  0  0
  4  5  4  0  0  0  0
  5  6  4  0  0  0  0
  1  6  4  0  0  0  0
  6  7  1  0  0  0  0
  3  8  1  0  0  0  0
  8  9  2  0  0  0  0
  8 10  1  0  0  0  0
  1 11  1  0  0  0  0
  2 12  1  0  0  0  0
  4 13  1  0  0  0  0
  5 14  1  0  0  0  0
  7 15  1  0  0  0  0
  7 16  1  0  0  0  0
M  CHG  2   8   1  10  -1
M  END
$$$$
15
  Mrv0541 12152312282D          

 15 15  0  0  0  0            999 V2000
    0.7145    1.2375    0.0000 C   0  0  0  0  0  0  0  0  0  0  0  0
    1.4289    0.8250    0.0000 C   0  0  0  0  0  0  0  0  0  0  0  0
    1.4289   -0.0000    0.0000 C   0  0  0  0  0  0  0  0  0  0  0  0
    0.7145   -0.4125    0.0000 C   0  0  0  0  0  0  0  0  0  0  0  0
    0.0000    0.0000    0.0000 C   0  0  0  0  0  0  0  0  0  0  0  0
    0.0000    0.8250    0.0000 C   0  0  0  0  0  0  0  0  0  0  0  0
   -0.7145    1.2375    0.0000 N   0  3  0  0  0  0  0  0  0  0  0  0
   -1.4289    0.8250    0.0000 O   0  0  0  0  0  0  0  0  0  0  0  0
   -0.7145    2.0625    0.0000 O   0  5  0  0  0  0  0  0  0  0  0  0
    2.1434   -0.4125    0.0000 O   0  0  0  0  0  0  0  0  0  0  0  0
    0.7145    2.0625    0.0000 H   0  0  0  0  0  0  0  0  0  0  0  0
    2.1434    1.2375    0.0000 H   0  0  0  0  0  0  0  0  0  0  0  0
    0.7145   -1.2375    0.0000 H   0  0  0  0  0  0  0  0  0  0  0  0
   -0.7145   -0.4125    0.0000 H   0  0  0  0  0  0  0  0  0  0  0  0
    2.1434   -1.2375    0.0000 H   0  0  0  0  0  0  0  0  0  0  0  0
  1  2  4  0  0  0  0
  2  3  4  0  0  0  0
  3  4  4  0  0  0  0
  4  5  4  0  0  0  0
  5  6  4  0  0  0  0
  1  6  4  0  0  0  0
  6  7  1  0  0  0  0
  7  8  2  0  0  0  0
  7  9  1  0  0  0  0
  3 10  1  0  0  0  0
  1 11  1  0  0  0  0
  2 12  1  0  0  0  0
  4 13  1  0  0  0  0
  5 14  1  0  0  0  0
 10 15  1  0  0  0  0
M  CHG  2   7   1   9  -1
M  END
$$$$
16
  Mrv0541 12152312282D          

 18 18  0  0  0  0            999 V2000
    0.0000    2.4750    0.0000 C   0  0  0  0  0  0  0  0  0  0  0  0
    0.7145    2.0625    0.0000 C   0  0  0  0  0  0  0  0  0  0  0  0
    0.7145    1.2375    0.0000 C   0  0  0  0  0  0  0  0  0  0  0  0
    1.4289    0.8250    0.0000 C   0  0  0  0  0  0  0  0  0  0  0  0
    1.4289   -0.0000    0.0000 C   0  0  0  0  0  0  0  0  0  0  0  0
    0.7145   -0.4125    0.0000 C   0  0  0  0  0  0  0  0  0  0  0  0
    0.0000    0.0000    0.0000 C   0  0  0  0  0  0  0  0  0  0  0  0
    0.0000    0.8250    0.0000 C   0  0  0  0  0  0  0  0  0  0  0  0
    0.4125    3.1895    0.0000 H   0  0  0  0  0  0  0  0  0  0  0  0
   -0.7145    2.8875    0.0000 H   0  0  0  0  0  0  0  0  0  0  0  0
   -0.4125    1.7605    0.0000 H   0  0  0  0  0  0  0  0  0  0  0  0
    1.1517    2.7621    0.0000 H   0  0  0  0  0  0  0  0  0  0  0  0
    1.5390    2.0913    0.0000 H   0  0  0  0  0  0  0  0  0  0  0  0
    2.1434    1.2375    0.0000 H   0  0  0  0  0  0  0  0  0  0  0  0
    2.1434   -0.4125    0.0000 H   0  0  0  0  0  0  0  0  0  0  0  0
    0.7145   -1.2375    0.0000 H   0  0  0  0  0  0  0  0  0  0  0  0
   -0.7145   -0.4125    0.0000 H   0  0  0  0  0  0  0  0  0  0  0  0
   -0.7145    1.2375    0.0000 H   0  0  0  0  0  0  0  0  0  0  0  0
  1  2  1  0  0  0  0
  2  3  1  0  0  0  0
  3  4  4  0  0  0  0
  4  5  4  0  0  0  0
  5  6  4  0  0  0  0
  6  7  4  0  0  0  0
  7  8  4  0  0  0  0
  3  8  4  0  0  0  0
  1  9  1  0  0  0  0
  1 10  1  0  0  0  0
  1 11  1  0  0  0  0
  2 12  1  0  0  0  0
  2 13  1  0  0  0  0
  4 14  1  0  0  0  0
  5 15  1  0  0  0  0
  6 16  1  0  0  0  0
  7 17  1  0  0  0  0
  8 18  1  0  0  0  0
M  END
$$$$
17
  Mrv0541 12152312282D          

 16 16  0  0  0  0            999 V2000
    0.0000    2.4750    0.0000 C   0  0  0  0  0  0  0  0  0  0  0  0
    0.7145    2.0625    0.0000 C   0  0  0  0  0  0  0  0  0  0  0  0
    0.7145    1.2375    0.0000 C   0  0  0  0  0  0  0  0  0  0  0  0
    1.4289    0.8250    0.0000 C   0  0  0  0  0  0  0  0  0  0  0  0
    1.4289   -0.0000    0.0000 C   0  0  0  0  0  0  0  0  0  0  0  0
    0.7145   -0.4125    0.0000 C   0  0  0  0  0  0  0  0  0  0  0  0
    0.0000    0.0000    0.0000 C   0  0  0  0  0  0  0  0  0  0  0  0
    0.0000    0.8250    0.0000 C   0  0  0  0  0  0  0  0  0  0  0  0
    0.0000    3.3000    0.0000 H   0  0  0  0  0  0  0  0  0  0  0  0
   -0.7145    2.0625    0.0000 H   0  0  0  0  0  0  0  0  0  0  0  0
    1.4289    2.4750    0.0000 H   0  0  0  0  0  0  0  0  0  0  0  0
    2.1434    1.2375    0.0000 H   0  0  0  0  0  0  0  0  0  0  0  0
    2.1434   -0.4125    0.0000 H   0  0  0  0  0  0  0  0  0  0  0  0
    0.7145   -1.2375    0.0000 H   0  0  0  0  0  0  0  0  0  0  0  0
   -0.7145   -0.4125    0.0000 H   0  0  0  0  0  0  0  0  0  0  0  0
   -0.7145    1.2375    0.0000 H   0  0  0  0  0  0  0  0  0  0  0  0
  1  2  2  0  0  0  0
  2  3  1  0  0  0  0
  3  4  4  0  0  0  0
  4  5  4  0  0  0  0
  5  6  4  0  0  0  0
  6  7  4  0  0  0  0
  7  8  4  0  0  0  0
  3  8  4  0  0  0  0
  1  9  1  0  0  0  0
  1 10  1  0  0  0  0
  2 11  1  0  0  0  0
  4 12  1  0  0  0  0
  5 13  1  0  0  0  0
  6 14  1  0  0  0  0
  7 15  1  0  0  0  0
  8 16  1  0  0  0  0
M  END
$$$$
18
  Mrv0541 12152312282D          

 52 56  0  0  0  0            999 V2000
    1.8414   -3.1895    0.0000 C   0  0  0  0  0  0  0  0  0  0  0  0
    1.0164   -3.1895    0.0000 C   0  0  0  0  0  0  0  0  0  0  0  0
    1.4289   -2.4750    0.0000 C   0  0  0  0  0  0  0  0  0  0  0  0
    1.4289   -1.6500    0.0000 C   0  0  0  0  0  0  0  0  0  0  0  0
    0.7145   -1.2375    0.0000 C   0  0  0  0  0  0  0  0  0  0  0  0
    0.7145   -0.4125    0.0000 C   0  0  0  0  0  0  0  0  0  0  0  0
    1.4289    0.0000    0.0000 C   0  0  0  0  0  0  0  0  0  0  0  0
    2.1434   -0.4125    0.0000 C   0  0  0  0  0  0  0  0  0  0  0  0
    2.8579    0.0000    0.0000 C   0  0  0  0  0  0  0  0  0  0  0  0
    3.5724   -0.4125    0.0000 C   0  0  0  0  0  0  0  0  0  0  0  0
    3.5724   -1.2375    0.0000 C   0  0  0  0  0  0  0  0  0  0  0  0
    2.8579   -1.6500    0.0000 C   0  0  0  0  0  0  0  0  0  0  0  0
    2.1434   -1.2375    0.0000 C   0  0  0  0  0  0  0  0  0  0  0  0
    1.4289    0.8250    0.0000 N   0  0  0  0  0  0  0  0  0  0  0  0
    0.7615    1.3099    0.0000 C   0  0  0  0  0  0  0  0  0  0  0  0
    1.0164    2.0945    0.0000 N   0  0  0  0  0  0  0  0  0  0  0  0
    1.8414    2.0945    0.0000 N   0  0  0  0  0  0  0  0  0  0  0  0
    2.0964    1.3099    0.0000 C   0  0  0  0  0  0  0  0  0  0  0  0
    2.8810    1.0550    0.0000 Br  0  0  0  0  0  0  0  0  0  0  0  0
   -0.0231    1.0550    0.0000 S   0  0  0  0  0  0  0  0  0  0  0  0
   -0.1946    0.2480    0.0000 C   0  0  0  0  0  0  0  0  0  0  0  0
   -0.9793   -0.0069    0.0000 C   0  0  0  0  0  0  0  0  0  0  0  0
   -1.5924    0.5451    0.0000 O   0  0  0  0  0  0  0  0  0  0  0  0
   -1.1508   -0.8139    0.0000 N   0  0  0  0  0  0  0  0  0  0  0  0
   -1.9354   -1.0688    0.0000 C   0  0  0  0  0  0  0  0  0  0  0  0
   -2.1069   -1.8758    0.0000 C   0  0  0  0  0  0  0  0  0  0  0  0
   -2.8916   -2.1307    0.0000 C   0  0  0  0  0  0  0  0  0  0  0  0
   -3.5047   -1.5787    0.0000 C   0  0  0  0  0  0  0  0  0  0  0  0
   -3.3331   -0.7717    0.0000 C   0  0  0  0  0  0  0  0  0  0  0  0
   -2.5485   -0.5168    0.0000 C   0  0  0  0  0  0  0  0  0  0  0  0
   -4.2893   -1.8337    0.0000 C   0  0  0  0  0  0  0  0  0  0  0  0
   -4.4608   -2.6406    0.0000 O   0  0  0  0  0  0  0  0  0  0  0  0
   -4.9024   -1.2816    0.0000 O   0  0  0  0  0  0  0  0  0  0  0  0
   -1.4938   -2.4278    0.0000 Cl  0  0  0  0  0  0  0  0  0  0  0  0
    2.1901   -3.9372    0.0000 H   0  0  0  0  0  0  0  0  0  0  0  0
    2.6633   -3.1176    0.0000 H   0  0  0  0  0  0  0  0  0  0  0  0
    0.6678   -3.9372    0.0000 H   0  0  0  0  0  0  0  0  0  0  0  0
    0.1946   -3.1176    0.0000 H   0  0  0  0  0  0  0  0  0  0  0  0
    0.6321   -2.2615    0.0000 H   0  0  0  0  0  0  0  0  0  0  0  0
    0.0000   -1.6500    0.0000 H   0  0  0  0  0  0  0  0  0  0  0  0
    0.0000    0.0000    0.0000 H   0  0  0  0  0  0  0  0  0  0  0  0
    3.1401    0.7752    0.0000 H   0  0  0  0  0  0  0  0  0  0  0  0
    4.2868   -0.0000    0.0000 H   0  0  0  0  0  0  0  0  0  0  0  0
    4.2868   -1.6500    0.0000 H   0  0  0  0  0  0  0  0  0  0  0  0
    2.8579   -2.4750    0.0000 H   0  0  0  0  0  0  0  0  0  0  0  0
    0.6058    0.0484    0.0000 H   0  0  0  0  0  0  0  0  0  0  0  0
    0.0875   -0.5272    0.0000 H   0  0  0  0  0  0  0  0  0  0  0  0
   -0.5377   -1.3659    0.0000 H   0  0  0  0  0  0  0  0  0  0  0  0
   -3.0631   -2.9377    0.0000 H   0  0  0  0  0  0  0  0  0  0  0  0
   -3.9462   -0.2197    0.0000 H   0  0  0  0  0  0  0  0  0  0  0  0
   -2.3770    0.2902    0.0000 H   0  0  0  0  0  0  0  0  0  0  0  0
   -4.7308   -0.4747    0.0000 H   0  0  0  0  0  0  0  0  0  0  0  0
  1  2  1  0  0  0  0
  2  3  1  0  0  0  0
  1  3  1  0  0  0  0
  3  4  1  0  0  0  0
  4  5  4  0  0  0  0
  5  6  4  0  0  0  0
  6  7  4  0  0  0  0
  7  8  4  0  0  0  0
  8  9  4  0  0  0  0
  9 10  4  0  0  0  0
 10 11  4  0  0  0  0
 11 12  4  0  0  0  0
 12 13  4  0  0  0  0
  4 13  4  0  0  0  0
  8 13  4  0  0  0  0
  7 14  1  0  0  0  0
 14 15  4  0  0  0  0
 15 16  4  0  0  0  0
 16 17  4  0  0  0  0
 17 18  4  0  0  0  0
 14 18  4  0  0  0  0
 18 19  1  0  0  0  0
 15 20  1  0  0  0  0
 20 21  1  0  0  0  0
 21 22  1  0  0  0  0
 22 23  2  0  0  0  0
 22 24  1  0  0  0  0
 24 25  1  0  0  0  0
 25 26  4  0  0  0  0
 26 27  4  0  0  0  0
 27 28  4  0  0  0  0
 28 29  4  0  0  0  0
 29 30  4  0  0  0  0
 25 30  4  0  0  0  0
 28 31  1  0  0  0  0
 31 32  2  0  0  0  0
 31 33  1  0  0  0  0
 26 34  1  0  0  0  0
  1 35  1  0  0  0  0
  1 36  1  0  0  0  0
  2 37  1  0  0  0  0
  2 38  1  0  0  0  0
  3 39  1  0  0  0  0
  5 40  1  0  0  0  0
  6 41  1  0  0  0  0
  9 42  1  0  0  0  0
 10 43  1  0  0  0  0
 11 44  1  0  0  0  0
 12 45  1  0  0  0  0
 21 46  1  0  0  0  0
 21 47  1  0  0  0  0
 24 48  1  0  0  0  0
 27 49  1  0  0  0  0
 29 50  1  0  0  0  0
 30 51  1  0  0  0  0
 33 52  1  0  0  0  0
M  END
$$$$
19
  Mrv0541 12152312282D          

 12 12  0  0  0  0            999 V2000
    0.7145    1.2375    0.0000 C   0  0  0  0  0  0  0  0  0  0  0  0
    1.4289    0.8250    0.0000 C   0  0  0  0  0  0  0  0  0  0  0  0
    1.4289   -0.0000    0.0000 C   0  0  0  0  0  0  0  0  0  0  0  0
    0.7145   -0.4125    0.0000 C   0  0  0  0  0  0  0  0  0  0  0  0
    0.0000    0.0000    0.0000 N   0  0  0  0  0  0  0  0  0  0  0  0
    0.0000    0.8250    0.0000 C   0  0  0  0  0  0  0  0  0  0  0  0
    2.1434   -0.4125    0.0000 C   0  0  0  0  0  0  0  0  0  0  0  0
    2.8579   -0.8250    0.0000 N   0  0  0  0  0  0  0  0  0  0  0  0
    0.7145    2.0625    0.0000 H   0  0  0  0  0  0  0  0  0  0  0  0
    2.1434    1.2375    0.0000 H   0  0  0  0  0  0  0  0  0  0  0  0
    0.7145   -1.2375    0.0000 H   0  0  0  0  0  0  0  0  0  0  0  0
   -0.7145    1.2375    0.0000 H   0  0  0  0  0  0  0  0  0  0  0  0
  1  2  4  0  0  0  0
  2  3  4  0  0  0  0
  3  4  4  0  0  0  0
  4  5  4  0  0  0  0
  5  6  4  0  0  0  0
  1  6  4  0  0  0  0
  3  7  1  0  0  0  0
  7  8  3  0  0  0  0
  1  9  1  0  0  0  0
  2 10  1  0  0  0  0
  4 11  1  0  0  0  0
  6 12  1  0  0  0  0
M  END
$$$$
20
  Mrv0541 12152312282D          

 19 19  0  0  0  0            999 V2000
    0.0000    3.3000    0.0000 C   0  0  0  0  0  0  0  0  0  0  0  0
    0.0000    2.4750    0.0000 C   0  0  0  0  0  0  0  0  0  0  0  0
    0.7145    2.0625    0.0000 N   0  0  0  0  0  0  0  0  0  0  0  0
    0.7145    1.2375    0.0000 C   0  0  0  0  0  0  0  0  0  0  0  0
    1.4289    0.8250    0.0000 N   0  0  0  0  0  0  0  0  0  0  0  0
    1.4289   -0.0000    0.0000 C   0  0  0  0  0  0  0  0  0  0  0  0
    0.7145   -0.4125    0.0000 N   0  0  0  0  0  0  0  0  0  0  0  0
    0.0000    0.0000    0.0000 C   0  0  0  0  0  0  0  0  0  0  0  0
    0.0000    0.8250    0.0000 N   0  0  0  0  0  0  0  0  0  0  0  0
   -0.7145   -0.4125    0.0000 N   0  0  0  0  0  0  0  0  0  0  0  0
    2.1434   -0.4125    0.0000 Cl  0  0  0  0  0  0  0  0  0  0  0  0
    0.8250    3.3000    0.0000 H   0  0  0  0  0  0  0  0  0  0  0  0
    0.0000    4.1250    0.0000 H   0  0  0  0  0  0  0  0  0  0  0  0
   -0.8250    3.3000    0.0000 H   0  0  0  0  0  0  0  0  0  0  0  0
   -0.8245    2.4462    0.0000 H   0  0  0  0  0  0  0  0  0  0  0  0
   -0.4372    1.7754    0.0000 H   0  0  0  0  0  0  0  0  0  0  0  0
    1.4289    2.4750    0.0000 H   0  0  0  0  0  0  0  0  0  0  0  0
   -1.4289    0.0000    0.0000 H   0  0  0  0  0  0  0  0  0  0  0  0
   -0.7145   -1.2375    0.0000 H   0  0  0  0  0  0  0  0  0  0  0  0
  1  2  1  0  0  0  0
  2  3  1  0  0  0  0
  3  4  1  0  0  0  0
  4  5  4  0  0  0  0
  5  6  4  0  0  0  0
  6  7  4  0  0  0  0
  7  8  4  0  0  0  0
  8  9  4  0  0  0  0
  4  9  4  0  0  0  0
  8 10  1  0  0  0  0
  6 11  1  0  0  0  0
  1 12  1  0  0  0  0
  1 13  1  0  0  0  0
  1 14  1  0  0  0  0
  2 15  1  0  0  0  0
  2 16  1  0  0  0  0
  3 17  1  0  0  0  0
 10 18  1  0  0  0  0
 10 19  1  0  0  0  0
M  END
$$$$
21
  Mrv0541 12152312282D          

 43 44  0  0  0  0            999 V2000
   -2.0367   -2.1241    0.0000 C   0  0  0  0  0  0  0  0  0  0  0  0
   -2.0367   -2.9491    0.0000 N   0  0  0  0  0  0  0  0  0  0  0  0
   -1.3693   -3.4340    0.0000 C   0  0  0  0  0  0  0  0  0  0  0  0
   -1.6242   -4.2187    0.0000 C   0  0  0  0  0  0  0  0  0  0  0  0
   -2.4492   -4.2187    0.0000 C   0  0  0  0  0  0  0  0  0  0  0  0
   -2.7041   -3.4340    0.0000 N   0  0  0  0  0  0  0  0  0  0  0  0
   -2.9341   -4.8861    0.0000 Cl  0  0  0  0  0  0  0  0  0  0  0  0
   -1.1393   -4.8861    0.0000 C   0  0  0  0  0  0  0  0  0  0  0  0
   -0.3188   -4.7999    0.0000 O   0  0  0  0  0  0  0  0  0  0  0  0
   -1.4748   -5.6398    0.0000 O   0  0  0  0  0  0  0  0  0  0  0  0
   -0.9899   -6.3072    0.0000 C   0  0  0  0  0  0  0  0  0  0  0  0
   -0.5846   -3.1791    0.0000 S   0  0  0  0  0  0  0  0  0  0  0  0
   -0.3297   -3.9637    0.0000 O   0  0  0  0  0  0  0  0  0  0  0  0
   -0.8396   -2.3945    0.0000 O   0  0  0  0  0  0  0  0  0  0  0  0
    0.2000   -2.9242    0.0000 N   0  0  0  0  0  0  0  0  0  0  0  0
    0.3715   -2.1172    0.0000 C   0  0  0  0  0  0  0  0  0  0  0  0
   -0.2416   -1.5651    0.0000 O   0  0  0  0  0  0  0  0  0  0  0  0
    1.1561   -1.8622    0.0000 N   0  0  0  0  0  0  0  0  0  0  0  0
    1.3277   -1.0553    0.0000 C   0  0  0  0  0  0  0  0  0  0  0  0
    0.7146   -0.5032    0.0000 N   0  0  0  0  0  0  0  0  0  0  0  0
    0.8861    0.3037    0.0000 C   0  0  0  0  0  0  0  0  0  0  0  0
    1.6707    0.5587    0.0000 C   0  0  0  0  0  0  0  0  0  0  0  0
    2.2838    0.0066    0.0000 C   0  0  0  0  0  0  0  0  0  0  0  0
    2.1123   -0.8003    0.0000 N   0  0  0  0  0  0  0  0  0  0  0  0
    3.0684    0.2616    0.0000 O   0  0  0  0  0  0  0  0  0  0  0  0
    3.2399    1.0686    0.0000 C   0  0  0  0  0  0  0  0  0  0  0  0
    0.2730    0.8558    0.0000 O   0  0  0  0  0  0  0  0  0  0  0  0
    0.4445    1.6627    0.0000 C   0  0  0  0  0  0  0  0  0  0  0  0
   -1.2117   -2.1241    0.0000 H   0  0  0  0  0  0  0  0  0  0  0  0
   -2.0367   -1.2991    0.0000 H   0  0  0  0  0  0  0  0  0  0  0  0
   -2.8617   -2.1241    0.0000 H   0  0  0  0  0  0  0  0  0  0  0  0
   -1.6574   -6.7921    0.0000 H   0  0  0  0  0  0  0  0  0  0  0  0
   -0.5050   -6.9746    0.0000 H   0  0  0  0  0  0  0  0  0  0  0  0
   -0.3225   -5.8223    0.0000 H   0  0  0  0  0  0  0  0  0  0  0  0
    0.8131   -3.4762    0.0000 H   0  0  0  0  0  0  0  0  0  0  0  0
    1.7692   -2.4143    0.0000 H   0  0  0  0  0  0  0  0  0  0  0  0
    1.8422    1.3656    0.0000 H   0  0  0  0  0  0  0  0  0  0  0  0
    4.0469    0.8970    0.0000 H   0  0  0  0  0  0  0  0  0  0  0  0
    3.4115    1.8755    0.0000 H   0  0  0  0  0  0  0  0  0  0  0  0
    2.4330    1.2401    0.0000 H   0  0  0  0  0  0  0  0  0  0  0  0
    1.2515    1.4912    0.0000 H   0  0  0  0  0  0  0  0  0  0  0  0
    0.6160    2.4697    0.0000 H   0  0  0  0  0  0  0  0  0  0  0  0
   -0.3625    1.8343    0.0000 H   0  0  0  0  0  0  0  0  0  0  0  0
  1  2  1  0  0  0  0
  2  3  4  0  0  0  0
  3  4  4  0  0  0  0
  4  5  4  0  0  0  0
  5  6  4  0  0  0  0
  2  6  4  0  0  0  0
  5  7  1  0  0  0  0
  4  8  1  0  0  0  0
  8  9  2  0  0  0  0
  8 10  1  0  0  0  0
 10 11  1  0  0  0  0
  3 12  1  0  0  0  0
 12 13  2  0  0  0  0
 12 14  2  0  0  0  0
 12 15  1  0  0  0  0
 15 16  1  0  0  0  0
 16 17  2  0  0  0  0
 16 18  1  0  0  0  0
 18 19  1  0  0  0  0
 19 20  4  0  0  0  0
 20 21  4  0  0  0  0
 21 22  4  0  0  0  0
 22 23  4  0  0  0  0
 23 24  4  0  0  0  0
 19 24  4  0  0  0  0
 23 25  1  0  0  0  0
 25 26  1  0  0  0  0
 21 27  1  0  0  0  0
 27 28  1  0  0  0  0
  1 29  1  0  0  0  0
  1 30  1  0  0  0  0
  1 31  1  0  0  0  0
 11 32  1  0  0  0  0
 11 33  1  0  0  0  0
 11 34  1  0  0  0  0
 15 35  1  0  0  0  0
 18 36  1  0  0  0  0
 22 37  1  0  0  0  0
 26 38  1  0  0  0  0
 26 39  1  0  0  0  0
 26 40  1  0  0  0  0
 28 41  1  0  0  0  0
 28 42  1  0  0  0  0
 28 43  1  0  0  0  0
M  END
$$$$
22
  Mrv0541 12152312282D          

 62 65  0  0  0  0            999 V2000
    5.8263   -5.3625    0.0000 C   0  0  0  0  0  0  0  0  0  0  0  0
    5.0013   -5.3625    0.0000 C   0  0  0  0  0  0  0  0  0  0  0  0
    4.1763   -5.3625    0.0000 C   0  0  0  0  0  0  0  0  0  0  0  0
    5.0013   -6.1875    0.0000 C   0  0  0  0  0  0  0  0  0  0  0  0
    5.7158   -6.6000    0.0000 C   0  0  0  0  0  0  0  0  0  0  0  0
    5.7158   -7.4250    0.0000 C   0  0  0  0  0  0  0  0  0  0  0  0
    5.0013   -7.8375    0.0000 C   0  0  0  0  0  0  0  0  0  0  0  0
    4.2868   -7.4250    0.0000 C   0  0  0  0  0  0  0  0  0  0  0  0
    4.2868   -6.6000    0.0000 C   0  0  0  0  0  0  0  0  0  0  0  0
    5.0013   -4.5375    0.0000 C   0  0  0  0  0  0  0  0  0  0  0  0
    4.2868   -4.1250    0.0000 C   0  0  0  0  0  0  0  0  0  0  0  0
    4.2868   -3.3000    0.0000 C   0  0  0  0  0  0  0  0  0  0  0  0
    5.0013   -2.8875    0.0000 C   0  0  0  0  0  0  0  0  0  0  0  0
    5.7158   -3.3000    0.0000 C   0  0  0  0  0  0  0  0  0  0  0  0
    5.7158   -4.1250    0.0000 C   0  0  0  0  0  0  0  0  0  0  0  0
    5.0013   -2.0625    0.0000 N   0  0  0  0  0  0  0  0  0  0  0  0
    5.7158   -1.6500    0.0000 C   0  0  0  0  0  0  0  0  0  0  0  0
    5.7158   -0.8250    0.0000 C   0  0  0  0  0  0  0  0  0  0  0  0
    6.4302   -0.4125    0.0000 C   0  0  0  0  0  0  0  0  0  0  0  0
    7.1447   -0.8250    0.0000 C   0  0  0  0  0  0  0  0  0  0  0  0
    7.1447   -1.6500    0.0000 C   0  0  0  0  0  0  0  0  0  0  0  0
    6.4302   -2.0625    0.0000 C   0  0  0  0  0  0  0  0  0  0  0  0
    7.8592   -0.4125    0.0000 C   0  0  0  0  0  0  0  0  0  0  0  0
    8.2717   -1.1270    0.0000 C   0  0  0  0  0  0  0  0  0  0  0  0
    7.4467    0.3020    0.0000 C   0  0  0  0  0  0  0  0  0  0  0  0
    8.5737    0.0000    0.0000 C   0  0  0  0  0  0  0  0  0  0  0  0
    8.5737    0.8250    0.0000 C   0  0  0  0  0  0  0  0  0  0  0  0
    9.2881    1.2375    0.0000 C   0  0  0  0  0  0  0  0  0  0  0  0
   10.0026    0.8250    0.0000 C   0  0  0  0  0  0  0  0  0  0  0  0
   10.0026    0.0000    0.0000 C   0  0  0  0  0  0  0  0  0  0  0  0
    9.2881   -0.4125    0.0000 C   0  0  0  0  0  0  0  0  0  0  0  0
    5.8263   -6.1875    0.0000 H   0  0  0  0  0  0  0  0  0  0  0  0
    6.6513   -5.3625    0.0000 H   0  0  0  0  0  0  0  0  0  0  0  0
    5.8263   -4.5375    0.0000 H   0  0  0  0  0  0  0  0  0  0  0  0
    4.1763   -4.5375    0.0000 H   0  0  0  0  0  0  0  0  0  0  0  0
    3.3513   -5.3625    0.0000 H   0  0  0  0  0  0  0  0  0  0  0  0
    4.1763   -6.1875    0.0000 H   0  0  0  0  0  0  0  0  0  0  0  0
    6.4302   -6.1875    0.0000 H   0  0  0  0  0  0  0  0  0  0  0  0
    6.4302   -7.8375    0.0000 H   0  0  0  0  0  0  0  0  0  0  0  0
    5.0013   -8.6625    0.0000 H   0  0  0  0  0  0  0  0  0  0  0  0
    3.5724   -7.8375    0.0000 H   0  0  0  0  0  0  0  0  0  0  0  0
    3.5724   -6.1875    0.0000 H   0  0  0  0  0  0  0  0  0  0  0  0
    3.5724   -4.5375    0.0000 H   0  0  0  0  0  0  0  0  0  0  0  0
    3.5724   -2.8875    0.0000 H   0  0  0  0  0  0  0  0  0  0  0  0
    6.2461   -2.6680    0.0000 H   0  0  0  0  0  0  0  0  0  0  0  0
    6.4302   -4.5375    0.0000 H   0  0  0  0  0  0  0  0  0  0  0  0
    4.2868   -1.6500    0.0000 H   0  0  0  0  0  0  0  0  0  0  0  0
    5.0013   -0.4125    0.0000 H   0  0  0  0  0  0  0  0  0  0  0  0
    6.4302    0.4125    0.0000 H   0  0  0  0  0  0  0  0  0  0  0  0
    7.8592   -2.0625    0.0000 H   0  0  0  0  0  0  0  0  0  0  0  0
    6.4302   -2.8875    0.0000 H   0  0  0  0  0  0  0  0  0  0  0  0
    7.5572   -1.5395    0.0000 H   0  0  0  0  0  0  0  0  0  0  0  0
    8.6842   -1.8414    0.0000 H   0  0  0  0  0  0  0  0  0  0  0  0
    8.9862   -0.7145    0.0000 H   0  0  0  0  0  0  0  0  0  0  0  0
    8.1612    0.7145    0.0000 H   0  0  0  0  0  0  0  0  0  0  0  0
    7.0342    1.0164    0.0000 H   0  0  0  0  0  0  0  0  0  0  0  0
    6.7322   -0.1105    0.0000 H   0  0  0  0  0  0  0  0  0  0  0  0
    7.8592    1.2375    0.0000 H   0  0  0  0  0  0  0  0  0  0  0  0
    9.2881    2.0625    0.0000 H   0  0  0  0  0  0  0  0  0  0  0  0
   10.7171    1.2375    0.0000 H   0  0  0  0  0  0  0  0  0  0  0  0
   10.7171   -0.4125    0.0000 H   0  0  0  0  0  0  0  0  0  0  0  0
    9.2881   -1.2375    0.0000 H   0  0  0  0  0  0  0  0  0  0  0  0
  1  2  1  0  0  0  0
  2  3  1  0  0  0  0
  2  4  1  0  0  0  0
  4  5  4  0  0  0  0
  5  6  4  0  0  0  0
  6  7  4  0  0  0  0
  7  8  4  0  0  0  0
  8  9  4  0  0  0  0
  4  9  4  0  0  0  0
  2 10  1  0  0  0  0
 10 11  4  0  0  0  0
 11 12  4  0  0  0  0
 12 13  4  0  0  0  0
 13 14  4  0  0  0  0
 14 15  4  0  0  0  0
 10 15  4  0  0  0  0
 13 16  1  0  0  0  0
 16 17  1  0  0  0  0
 17 18  4  0  0  0  0
 18 19  4  0  0  0  0
 19 20  4  0  0  0  0
 20 21  4  0  0  0  0
 21 22  4  0  0  0  0
 17 22  4  0  0  0  0
 20 23  1  0  0  0  0
 23 24  1  0  0  0  0
 23 25  1  0  0  0  0
 23 26  1  0  0  0  0
 26 27  4  0  0  0  0
 27 28  4  0  0  0  0
 28 29  4  0  0  0  0
 29 30  4  0  0  0  0
 30 31  4  0  0  0  0
 26 31  4  0  0  0  0
  1 32  1  0  0  0  0
  1 33  1  0  0  0  0
  1 34  1  0  0  0  0
  3 35  1  0  0  0  0
  3 36  1  0  0  0  0
  3 37  1  0  0  0  0
  5 38  1  0  0  0  0
  6 39  1  0  0  0  0
  7 40  1  0  0  0  0
  8 41  1  0  0  0  0
  9 42  1  0  0  0  0
 11 43  1  0  0  0  0
 12 44  1  0  0  0  0
 14 45  1  0  0  0  0
 15 46  1  0  0  0  0
 16 47  1  0  0  0  0
 18 48  1  0  0  0  0
 19 49  1  0  0  0  0
 21 50  1  0  0  0  0
 22 51  1  0  0  0  0
 24 52  1  0  0  0  0
 24 53  1  0  0  0  0
 24 54  1  0  0  0  0
 25 55  1  0  0  0  0
 25 56  1  0  0  0  0
 25 57  1  0  0  0  0
 27 58  1  0  0  0  0
 28 59  1  0  0  0  0
 29 60  1  0  0  0  0
 30 61  1  0  0  0  0
 31 62  1  0  0  0  0
M  END
$$$$
23
  Mrv0541 12152312282D          

 22 24  0  0  0  0            999 V2000
    0.1163   -2.0322    0.0000 C   0  0  0  0  0  0  0  0  0  0  0  0
    0.8517   -1.6585    0.0000 N   0  0  0  0  0  0  0  0  0  0  0  0
    0.8517   -0.9111    0.0000 C   0  0  0  0  0  0  0  0  0  0  0  0
    1.3012   -0.1208    0.0000 N   0  0  0  0  0  0  0  0  0  0  0  0
    0.5657   -0.4945    0.0000 C   0  0  0  0  0  0  0  0  0  0  0  0
    0.5657   -1.2419    0.0000 N   0  0  0  0  0  0  0  0  0  0  0  0
    1.3012   -1.6156    0.0000 C   0  0  0  0  0  0  0  0  0  0  0  0
    2.0368   -1.2419    0.0000 N   0  0  0  0  0  0  0  0  0  0  0  0
    1.5873   -2.0322    0.0000 C   0  0  0  0  0  0  0  0  0  0  0  0
    2.0368   -0.4945    0.0000 C   0  0  0  0  0  0  0  0  0  0  0  0
   -0.0020   -2.8487    0.0000 H   0  0  0  0  0  0  0  0  0  0  0  0
   -0.7048   -2.1121    0.0000 H   0  0  0  0  0  0  0  0  0  0  0  0
    0.0384   -1.0493    0.0000 H   0  0  0  0  0  0  0  0  0  0  0  0
    0.2130   -0.3889    0.0000 H   0  0  0  0  0  0  0  0  0  0  0  0
    0.1518    0.2192    0.0000 H   0  0  0  0  0  0  0  0  0  0  0  0
   -0.2580   -0.4488    0.0000 H   0  0  0  0  0  0  0  0  0  0  0  0
    0.9230   -2.3488    0.0000 H   0  0  0  0  0  0  0  0  0  0  0  0
    1.6794   -2.3488    0.0000 H   0  0  0  0  0  0  0  0  0  0  0  0
    2.1995   -2.5853    0.0000 H   0  0  0  0  0  0  0  0  0  0  0  0
    1.3812   -2.8310    0.0000 H   0  0  0  0  0  0  0  0  0  0  0  0
    2.8605   -0.4488    0.0000 H   0  0  0  0  0  0  0  0  0  0  0  0
    2.4506    0.2192    0.0000 H   0  0  0  0  0  0  0  0  0  0  0  0
  1  2  1  0  0  0  0
  4 10  1  0  0  0  0
  3  4  1  0  0  0  0
  4  5  1  0  0  0  0
  2  9  1  0  0  0  0
  1  6  1  0  0  0  0
  6  7  1  0  0  0  0
  7  8  1  0  0  0  0
  8  9  1  0  0  0  0
  5  6  1  0  0  0  0
  8 10  1  0  0  0  0
  2  3  1  0  0  0  0
  1 11  1  0  0  0  0
  1 12  1  0  0  0  0
  3 13  1  0  0  0  0
  3 14  1  0  0  0  0
  5 15  1  0  0  0  0
  5 16  1  0  0  0  0
  7 17  1  0  0  0  0
  7 18  1  0  0  0  0
  9 19  1  0  0  0  0
  9 20  1  0  0  0  0
 10 21  1  0  0  0  0
 10 22  1  0  0  0  0
M  END
$$$$
24
  Mrv0541 12152312282D          

 46 49  0  0  1  0            999 V2000
   -1.4289    0.0000    0.0000 C   0  0  0  0  0  0  0  0  0  0  0  0
   -0.7145   -0.4125    0.0000 C   0  0  1  0  0  0  0  0  0  0  0  0
   -0.7145   -1.2375    0.0000 C   0  0  0  0  0  0  0  0  0  0  0  0
    0.0000   -1.6500    0.0000 O   0  0  0  0  0  0  0  0  0  0  0  0
    0.7145   -1.2375    0.0000 C   0  0  0  0  0  0  0  0  0  0  0  0
    0.7145   -0.4125    0.0000 C   0  0  0  0  0  0  0  0  0  0  0  0
    0.0000   -0.0000    0.0000 N   0  0  0  0  0  0  0  0  0  0  0  0
    0.0000    0.8250    0.0000 C   0  0  0  0  0  0  0  0  0  0  0  0
    0.7145    1.2375    0.0000 C   0  0  0  0  0  0  0  0  0  0  0  0
    1.4289    0.8250    0.0000 C   0  0  0  0  0  0  0  0  0  0  0  0
    2.1434    1.2375    0.0000 O   0  0  0  0  0  0  0  0  0  0  0  0
    1.4289   -0.0000    0.0000 C   0  0  0  0  0  0  0  0  0  0  0  0
    2.1434   -0.4125    0.0000 C   0  0  0  0  0  0  0  0  0  0  0  0
    2.1434   -1.2375    0.0000 C   0  0  0  0  0  0  0  0  0  0  0  0
    1.4289   -1.6500    0.0000 C   0  0  0  0  0  0  0  0  0  0  0  0
    1.4289   -2.4750    0.0000 N   0  0  0  0  0  0  0  0  0  0  0  0
    2.1434   -2.8875    0.0000 C   0  0  0  0  0  0  0  0  0  0  0  0
    2.1434   -3.7125    0.0000 C   0  0  0  0  0  0  0  0  0  0  0  0
    1.4289   -4.1250    0.0000 N   0  0  0  0  0  0  0  0  0  0  0  0
    0.7145   -3.7125    0.0000 C   0  0  0  0  0  0  0  0  0  0  0  0
    0.7145   -2.8875    0.0000 C   0  0  0  0  0  0  0  0  0  0  0  0
    1.4289   -4.9500    0.0000 C   0  0  0  0  0  0  0  0  0  0  0  0
    2.8579   -1.6500    0.0000 F   0  0  0  0  0  0  0  0  0  0  0  0
    0.7145    2.0625    0.0000 C   0  0  0  0  0  0  0  0  0  0  0  0
    0.0000    2.4750    0.0000 O   0  0  0  0  0  0  0  0  0  0  0  0
    1.4289    2.4750    0.0000 O   0  0  0  0  0  0  0  0  0  0  0  0
   -1.0164    0.7145    0.0000 H   0  0  0  0  0  0  0  0  0  0  0  0
   -2.1434    0.4125    0.0000 H   0  0  0  0  0  0  0  0  0  0  0  0
   -1.8414   -0.7145    0.0000 H   0  0  0  0  0  0  0  0  0  0  0  0
   -1.4289   -0.8250    0.0000 H   0  0  0  0  0  0  0  0  0  0  0  0
   -1.5390   -1.2663    0.0000 H   0  0  0  0  0  0  0  0  0  0  0  0
   -1.1517   -1.9371    0.0000 H   0  0  0  0  0  0  0  0  0  0  0  0
   -0.7145    1.2375    0.0000 H   0  0  0  0  0  0  0  0  0  0  0  0
    2.8579    0.0000    0.0000 H   0  0  0  0  0  0  0  0  0  0  0  0
    2.5806   -2.1879    0.0000 H   0  0  0  0  0  0  0  0  0  0  0  0
    2.9679   -2.8587    0.0000 H   0  0  0  0  0  0  0  0  0  0  0  0
    2.9679   -3.7413    0.0000 H   0  0  0  0  0  0  0  0  0  0  0  0
    2.5806   -4.4121    0.0000 H   0  0  0  0  0  0  0  0  0  0  0  0
    0.2773   -4.4121    0.0000 H   0  0  0  0  0  0  0  0  0  0  0  0
   -0.1100   -3.7413    0.0000 H   0  0  0  0  0  0  0  0  0  0  0  0
   -0.1100   -2.8587    0.0000 H   0  0  0  0  0  0  0  0  0  0  0  0
    0.2773   -2.1879    0.0000 H   0  0  0  0  0  0  0  0  0  0  0  0
    0.6039   -4.9500    0.0000 H   0  0  0  0  0  0  0  0  0  0  0  0
    1.4289   -5.7750    0.0000 H   0  0  0  0  0  0  0  0  0  0  0  0
    2.2539   -4.9500    0.0000 H   0  0  0  0  0  0  0  0  0  0  0  0
    2.1434    2.0625    0.0000 H   0  0  0  0  0  0  0  0  0  0  0  0
  2  1  1  6  0  0  0
  2  3  1  0  0  0  0
  3  4  1  0  0  0  0
  4  5  1  0  0  0  0
  5  6  4  0  0  0  0
  6  7  1  0  0  0  0
  2  7  1  0  0  0  0
  7  8  1  0  0  0  0
  8  9  2  0  0  0  0
  9 10  1  0  0  0  0
 10 11  2  0  0  0  0
 10 12  1  0  0  0  0
  6 12  4  0  0  0  0
 12 13  4  0  0  0  0
 13 14  4  0  0  0  0
 14 15  4  0  0  0  0
  5 15  4  0  0  0  0
 15 16  1  0  0  0  0
 16 17  1  0  0  0  0
 17 18  1  0  0  0  0
 18 19  1  0  0  0  0
 19 20  1  0  0  0  0
 20 21  1  0  0  0  0
 16 21  1  0  0  0  0
 19 22  1  0  0  0  0
 14 23  1  0  0  0  0
  9 24  1  0  0  0  0
 24 25  2  0  0  0  0
 24 26  1  0  0  0  0
  1 27  1  0  0  0  0
  1 28  1  0  0  0  0
  1 29  1  0  0  0  0
  2 30  1  1  0  0  0
  3 31  1  0  0  0  0
  3 32  1  0  0  0  0
  8 33  1  0  0  0  0
 13 34  1  0  0  0  0
 17 35  1  0  0  0  0
 17 36  1  0  0  0  0
 18 37  1  0  0  0  0
 18 38  1  0  0  0  0
 20 39  1  0  0  0  0
 20 40  1  0  0  0  0
 21 41  1  0  0  0  0
 21 42  1  0  0  0  0
 22 43  1  0  0  0  0
 22 44  1  0  0  0  0
 22 45  1  0  0  0  0
 26 46  1  0  0  0  0
M  END
$$$$
25
  Mrv0541 12152312282D          

 21 22  0  0  0  0            999 V2000
    2.1434   -1.2375    0.0000 C   0  0  0  0  0  0  0  0  0  0  0  0
    2.8579   -1.6500    0.0000 C   0  0  0  0  0  0  0  0  0  0  0  0
    2.8579   -2.4750    0.0000 C   0  0  0  0  0  0  0  0  0  0  0  0
    2.1434   -2.8875    0.0000 C   0  0  0  0  0  0  0  0  0  0  0  0
    1.4289   -2.4750    0.0000 C   0  0  0  0  0  0  0  0  0  0  0  0
    1.4289   -1.6500    0.0000 C   0  0  0  0  0  0  0  0  0  0  0  0
    0.7145   -2.8875    0.0000 N   0  0  0  0  0  0  0  0  0  0  0  0
    0.0000   -2.4750    0.0000 C   0  0  0  0  0  0  0  0  0  0  0  0
   -0.7145   -2.8875    0.0000 N   0  0  0  0  0  0  0  0  0  0  0  0
   -1.4289   -2.4750    0.0000 C   0  0  0  0  0  0  0  0  0  0  0  0
   -1.4289   -1.6500    0.0000 N   0  0  0  0  0  0  0  0  0  0  0  0
   -0.7145   -1.2375    0.0000 C   0  0  0  0  0  0  0  0  0  0  0  0
    0.0000   -1.6500    0.0000 N   0  0  0  0  0  0  0  0  0  0  0  0
   -0.7145   -0.4125    0.0000 Cl  0  0  0  0  0  0  0  0  0  0  0  0
   -2.1434   -2.8875    0.0000 Cl  0  0  0  0  0  0  0  0  0  0  0  0
    2.1434   -3.7125    0.0000 Cl  0  0  0  0  0  0  0  0  0  0  0  0
    2.1434   -0.4125    0.0000 H   0  0  0  0  0  0  0  0  0  0  0  0
    3.5724   -1.2375    0.0000 H   0  0  0  0  0  0  0  0  0  0  0  0
    3.5724   -2.8875    0.0000 H   0  0  0  0  0  0  0  0  0  0  0  0
    0.7145   -1.2375    0.0000 H   0  0  0  0  0  0  0  0  0  0  0  0
    0.7145   -3.7125    0.0000 H   0  0  0  0  0  0  0  0  0  0  0  0
  1  2  4  0  0  0  0
  2  3  4  0  0  0  0
  3  4  4  0  0  0  0
  4  5  4  0  0  0  0
  5  6  4  0  0  0  0
  1  6  4  0  0  0  0
  5  7  1  0  0  0  0
  7  8  1  0  0  0  0
  8  9  4  0  0  0  0
  9 10  4  0  0  0  0
 10 11  4  0  0  0  0
 11 12  4  0  0  0  0
 12 13  4  0  0  0  0
  8 13  4  0  0  0  0
 12 14  1  0  0  0  0
 10 15  1  0  0  0  0
  4 16  1  0  0  0  0
  1 17  1  0  0  0  0
  2 18  1  0  0  0  0
  3 19  1  0  0  0  0
  6 20  1  0  0  0  0
  7 21  1  0  0  0  0
M  END
$$$$
26
  Mrv0541 12152312282D          

 22 22  0  0  0  0            999 V2000
   -0.7145    2.0625    0.0000 C   0  0  0  0  0  0  0  0  0  0  0  0
    0.0000    2.4750    0.0000 C   0  0  0  0  0  0  0  0  0  0  0  0
    0.0000    3.3000    0.0000 C   0  0  0  0  0  0  0  0  0  0  0  0
   -0.7145    3.7125    0.0000 O   0  0  0  0  0  0  0  0  0  0  0  0
    0.7145    3.7125    0.0000 O   0  0  0  0  0  0  0  0  0  0  0  0
    0.7145    2.0625    0.0000 O   0  0  0  0  0  0  0  0  0  0  0  0
    0.7145    1.2375    0.0000 C   0  0  0  0  0  0  0  0  0  0  0  0
    1.4289    0.8250    0.0000 C   0  0  0  0  0  0  0  0  0  0  0  0
    1.4289   -0.0000    0.0000 C   0  0  0  0  0  0  0  0  0  0  0  0
    0.7145   -0.4125    0.0000 C   0  0  0  0  0  0  0  0  0  0  0  0
    0.0000    0.0000    0.0000 C   0  0  0  0  0  0  0  0  0  0  0  0
    0.0000    0.8250    0.0000 C   0  0  0  0  0  0  0  0  0  0  0  0
    2.1434   -0.4125    0.0000 Cl  0  0  0  0  0  0  0  0  0  0  0  0
   -1.1270    2.7770    0.0000 H   0  0  0  0  0  0  0  0  0  0  0  0
   -1.4289    1.6500    0.0000 H   0  0  0  0  0  0  0  0  0  0  0  0
   -0.3020    1.3480    0.0000 H   0  0  0  0  0  0  0  0  0  0  0  0
   -0.7145    2.8875    0.0000 H   0  0  0  0  0  0  0  0  0  0  0  0
    1.4289    3.3000    0.0000 H   0  0  0  0  0  0  0  0  0  0  0  0
    2.1434    1.2375    0.0000 H   0  0  0  0  0  0  0  0  0  0  0  0
    0.7145   -1.2375    0.0000 H   0  0  0  0  0  0  0  0  0  0  0  0
   -0.7145   -0.4125    0.0000 H   0  0  0  0  0  0  0  0  0  0  0  0
   -0.7145    1.2375    0.0000 H   0  0  0  0  0  0  0  0  0  0  0  0
  1  2  1  0  0  0  0
  2  3  1  0  0  0  0
  3  4  2  0  0  0  0
  3  5  1  0  0  0  0
  2  6  1  0  0  0  0
  6  7  1  0  0  0  0
  7  8  4  0  0  0  0
  8  9  4  0  0  0  0
  9 10  4  0  0  0  0
 10 11  4  0  0  0  0
 11 12  4  0  0  0  0
  7 12  4  0  0  0  0
  9 13  1  0  0  0  0
  1 14  1  0  0  0  0
  1 15  1  0  0  0  0
  1 16  1  0  0  0  0
  2 17  1  0  0  0  0
  5 18  1  0  0  0  0
  8 19  1  0  0  0  0
 10 20  1  0  0  0  0
 11 21  1  0  0  0  0
 12 22  1  0  0  0  0
M  END
$$$$
27
  Mrv0541 12152312282D          

 38 41  0  0  0  0            999 V2000
    3.5724    2.0625    0.0000 C   0  0  0  0  0  0  0  0  0  0  0  0
    3.5724    1.2375    0.0000 C   0  0  0  0  0  0  0  0  0  0  0  0
    2.8579    0.8250    0.0000 C   0  0  0  0  0  0  0  0  0  0  0  0
    2.1434    1.2375    0.0000 C   0  0  0  0  0  0  0  0  0  0  0  0
    2.1434    2.0625    0.0000 C   0  0  0  0  0  0  0  0  0  0  0  0
    2.8579    2.4750    0.0000 C   0  0  0  0  0  0  0  0  0  0  0  0
    1.4289    0.8250    0.0000 O   0  0  0  0  0  0  0  0  0  0  0  0
    1.4289    0.0000    0.0000 C   0  0  0  0  0  0  0  0  0  0  0  0
    2.1434   -0.4125    0.0000 C   0  0  0  0  0  0  0  0  0  0  0  0
    2.8579    0.0000    0.0000 C   0  0  0  0  0  0  0  0  0  0  0  0
    3.5724   -0.4125    0.0000 C   0  0  0  0  0  0  0  0  0  0  0  0
    3.5724   -1.2375    0.0000 C   0  0  0  0  0  0  0  0  0  0  0  0
    2.8579   -1.6500    0.0000 C   0  0  0  0  0  0  0  0  0  0  0  0
    2.1434   -1.2375    0.0000 N   0  0  0  0  0  0  0  0  0  0  0  0
    1.4289   -1.6500    0.0000 C   0  0  0  0  0  0  0  0  0  0  0  0
    1.4289   -2.4750    0.0000 O   0  0  0  0  0  0  0  0  0  0  0  0
    0.7145   -1.2375    0.0000 C   0  0  0  0  0  0  0  0  0  0  0  0
    0.7145   -0.4125    0.0000 C   0  0  0  0  0  0  0  0  0  0  0  0
    0.0000   -1.6500    0.0000 C   0  0  0  0  0  0  0  0  0  0  0  0
   -0.7145   -1.2375    0.0000 O   0  0  0  0  0  0  0  0  0  0  0  0
    0.0000   -2.4750    0.0000 N   0  0  0  0  0  0  0  0  0  0  0  0
   -0.7145   -2.8875    0.0000 C   0  0  0  0  0  0  0  0  0  0  0  0
   -0.8007   -3.7080    0.0000 N   0  0  0  0  0  0  0  0  0  0  0  0
   -1.6077   -3.8795    0.0000 N   0  0  0  0  0  0  0  0  0  0  0  0
   -2.0202   -3.1650    0.0000 N   0  0  0  0  0  0  0  0  0  0  0  0
   -1.4681   -2.5519    0.0000 N   0  0  0  0  0  0  0  0  0  0  0  0
    4.2868    2.4750    0.0000 H   0  0  0  0  0  0  0  0  0  0  0  0
    4.2868    0.8250    0.0000 H   0  0  0  0  0  0  0  0  0  0  0  0
    2.5757    0.0498    0.0000 H   0  0  0  0  0  0  0  0  0  0  0  0
    1.4289    2.4750    0.0000 H   0  0  0  0  0  0  0  0  0  0  0  0
    2.8579    3.3000    0.0000 H   0  0  0  0  0  0  0  0  0  0  0  0
    3.1401    0.7752    0.0000 H   0  0  0  0  0  0  0  0  0  0  0  0
    4.2868   -0.0000    0.0000 H   0  0  0  0  0  0  0  0  0  0  0  0
    4.2868   -1.6500    0.0000 H   0  0  0  0  0  0  0  0  0  0  0  0
    2.8579   -2.4750    0.0000 H   0  0  0  0  0  0  0  0  0  0  0  0
    0.0000   -0.0000    0.0000 H   0  0  0  0  0  0  0  0  0  0  0  0
    0.7145   -2.8875    0.0000 H   0  0  0  0  0  0  0  0  0  0  0  0
   -1.9432   -4.6332    0.0000 H   0  0  0  0  0  0  0  0  0  0  0  0
  1  2  4  0  0  0  0
  2  3  4  0  0  0  0
  3  4  4  0  0  0  0
  4  5  4  0  0  0  0
  5  6  4  0  0  0  0
  1  6  4  0  0  0  0
  4  7  1  0  0  0  0
  7  8  1  0  0  0  0
  8  9  2  0  0  0  0
  9 10  1  0  0  0  0
 10 11  2  0  0  0  0
 11 12  1  0  0  0  0
 12 13  2  0  0  0  0
 13 14  1  0  0  0  0
  9 14  1  0  0  0  0
 14 15  1  0  0  0  0
 15 16  2  0  0  0  0
 15 17  1  0  0  0  0
 17 18  2  0  0  0  0
  8 18  1  0  0  0  0
 17 19  1  0  0  0  0
 19 20  2  0  0  0  0
 19 21  1  0  0  0  0
 21 22  1  0  0  0  0
 22 23  4  0  0  0  0
 23 24  4  0  0  0  0
 24 25  4  0  0  0  0
 25 26  4  0  0  0  0
 22 26  4  0  0  0  0
  1 27  1  0  0  0  0
  2 28  1  0  0  0  0
  3 29  1  0  0  0  0
  5 30  1  0  0  0  0
  6 31  1  0  0  0  0
 10 32  1  0  0  0  0
 11 33  1  0  0  0  0
 12 34  1  0  0  0  0
 13 35  1  0  0  0  0
 18 36  1  0  0  0  0
 21 37  1  0  0  0  0
 24 38  1  0  0  0  0
M  END
$$$$
28
  Mrv0541 12152312282D          

 26 26  0  0  0  0            999 V2000
    0.0000   -2.4750    0.0000 C   0  0  0  0  0  0  0  0  0  0  0  0
    0.7145   -2.8875    0.0000 C   0  0  0  0  0  0  0  0  0  0  0  0
    0.7145   -3.7125    0.0000 C   0  0  0  0  0  0  0  0  0  0  0  0
    1.4289   -2.4750    0.0000 O   0  0  0  0  0  0  0  0  0  0  0  0
    2.1434   -2.8875    0.0000 C   0  0  0  0  0  0  0  0  0  0  0  0
    2.1434   -3.7125    0.0000 O   0  0  0  0  0  0  0  0  0  0  0  0
    2.8579   -2.4750    0.0000 N   0  0  0  0  0  0  0  0  0  0  0  0
    3.5724   -2.8875    0.0000 C   0  0  0  0  0  0  0  0  0  0  0  0
    4.2868   -2.4750    0.0000 C   0  0  0  0  0  0  0  0  0  0  0  0
    5.0013   -2.8875    0.0000 C   0  0  0  0  0  0  0  0  0  0  0  0
    5.0013   -3.7125    0.0000 C   0  0  0  0  0  0  0  0  0  0  0  0
    4.2868   -4.1250    0.0000 C   0  0  0  0  0  0  0  0  0  0  0  0
    3.5724   -3.7125    0.0000 C   0  0  0  0  0  0  0  0  0  0  0  0
    5.7158   -2.4750    0.0000 Cl  0  0  0  0  0  0  0  0  0  0  0  0
    0.4125   -1.7605    0.0000 H   0  0  0  0  0  0  0  0  0  0  0  0
   -0.7145   -2.0625    0.0000 H   0  0  0  0  0  0  0  0  0  0  0  0
   -0.4125   -3.1895    0.0000 H   0  0  0  0  0  0  0  0  0  0  0  0
    0.0000   -3.3000    0.0000 H   0  0  0  0  0  0  0  0  0  0  0  0
   -0.1105   -3.7125    0.0000 H   0  0  0  0  0  0  0  0  0  0  0  0
    0.7145   -4.5375    0.0000 H   0  0  0  0  0  0  0  0  0  0  0  0
    1.5395   -3.7125    0.0000 H   0  0  0  0  0  0  0  0  0  0  0  0
    2.8579   -1.6500    0.0000 H   0  0  0  0  0  0  0  0  0  0  0  0
    4.2868   -1.6500    0.0000 H   0  0  0  0  0  0  0  0  0  0  0  0
    5.7158   -4.1250    0.0000 H   0  0  0  0  0  0  0  0  0  0  0  0
    4.2868   -4.9500    0.0000 H   0  0  0  0  0  0  0  0  0  0  0  0
    2.8579   -4.1250    0.0000 H   0  0  0  0  0  0  0  0  0  0  0  0
  1  2  1  0  0  0  0
  2  3  1  0  0  0  0
  2  4  1  0  0  0  0
  4  5  1  0  0  0  0
  5  6  2  0  0  0  0
  5  7  1  0  0  0  0
  7  8  1  0  0  0  0
  8  9  4  0  0  0  0
  9 10  4  0  0  0  0
 10 11  4  0  0  0  0
 11 12  4  0  0  0  0
 12 13  4  0  0  0  0
  8 13  4  0  0  0  0
 10 14  1  0  0  0  0
  1 15  1  0  0  0  0
  1 16  1  0  0  0  0
  1 17  1  0  0  0  0
  2 18  1  0  0  0  0
  3 19  1  0  0  0  0
  3 20  1  0  0  0  0
  3 21  1  0  0  0  0
  7 22  1  0  0  0  0
  9 23  1  0  0  0  0
 11 24  1  0  0  0  0
 12 25  1  0  0  0  0
 13 26  1  0  0  0  0
M  END
$$$$
29
  Mrv0541 12152312282D          

 33 33  0  0  0  0            999 V2000
    2.1434    3.7125    0.0000 C   0  0  0  0  0  0  0  0  0  0  0  0
    1.4289    3.3000    0.0000 C   0  0  0  0  0  0  0  0  0  0  0  0
    1.4289    2.4750    0.0000 C   0  0  0  0  0  0  0  0  0  0  0  0
    0.7145    2.0625    0.0000 O   0  0  0  0  0  0  0  0  0  0  0  0
    0.7145    1.2375    0.0000 C   0  0  0  0  0  0  0  0  0  0  0  0
    1.4289    0.8250    0.0000 N   0  0  0  0  0  0  0  0  0  0  0  0
    1.4289   -0.0000    0.0000 C   0  0  0  0  0  0  0  0  0  0  0  0
    0.7145   -0.4125    0.0000 N   0  0  0  0  0  0  0  0  0  0  0  0
    0.0000    0.0000    0.0000 C   0  0  0  0  0  0  0  0  0  0  0  0
    0.0000    0.8250    0.0000 N   0  0  0  0  0  0  0  0  0  0  0  0
   -0.7145   -0.4125    0.0000 O   0  0  0  0  0  0  0  0  0  0  0  0
   -0.7145   -1.2375    0.0000 C   0  0  0  0  0  0  0  0  0  0  0  0
   -1.4289   -1.6500    0.0000 C   0  0  0  0  0  0  0  0  0  0  0  0
   -1.4289   -2.4750    0.0000 C   0  0  0  0  0  0  0  0  0  0  0  0
    2.1434   -0.4125    0.0000 O   0  0  0  0  0  0  0  0  0  0  0  0
    2.1434   -1.2375    0.0000 C   0  0  0  0  0  0  0  0  0  0  0  0
    2.8579   -1.6500    0.0000 C   0  0  0  0  0  0  0  0  0  0  0  0
    2.8579   -2.4750    0.0000 C   0  0  0  0  0  0  0  0  0  0  0  0
    2.8579    3.3000    0.0000 H   0  0  0  0  0  0  0  0  0  0  0  0
    2.1434    4.5375    0.0000 H   0  0  0  0  0  0  0  0  0  0  0  0
    0.7145    3.7125    0.0000 H   0  0  0  0  0  0  0  0  0  0  0  0
    2.2534    2.4462    0.0000 H   0  0  0  0  0  0  0  0  0  0  0  0
    1.8661    1.7754    0.0000 H   0  0  0  0  0  0  0  0  0  0  0  0
    0.1100   -1.2663    0.0000 H   0  0  0  0  0  0  0  0  0  0  0  0
   -0.2773   -1.9371    0.0000 H   0  0  0  0  0  0  0  0  0  0  0  0
   -2.1434   -1.2375    0.0000 H   0  0  0  0  0  0  0  0  0  0  0  0
   -2.1434   -2.8875    0.0000 H   0  0  0  0  0  0  0  0  0  0  0  0
   -0.7145   -2.8875    0.0000 H   0  0  0  0  0  0  0  0  0  0  0  0
    1.3189   -1.2663    0.0000 H   0  0  0  0  0  0  0  0  0  0  0  0
    1.7062   -1.9371    0.0000 H   0  0  0  0  0  0  0  0  0  0  0  0
    3.5724   -1.2375    0.0000 H   0  0  0  0  0  0  0  0  0  0  0  0
    2.1434   -2.8875    0.0000 H   0  0  0  0  0  0  0  0  0  0  0  0
    3.5724   -2.8875    0.0000 H   0  0  0  0  0  0  0  0  0  0  0  0
  1  2  2  0  0  0  0
  2  3  1  0  0  0  0
  3  4  1  0  0  0  0
  4  5  1  0  0  0  0
  5  6  4  0  0  0  0
  6  7  4  0  0  0  0
  7  8  4  0  0  0  0
  8  9  4  0  0  0  0
  9 10  4  0  0  0  0
  5 10  4  0  0  0  0
  9 11  1  0  0  0  0
 11 12  1  0  0  0  0
 12 13  1  0  0  0  0
 13 14  2  0  0  0  0
  7 15  1  0  0  0  0
 15 16  1  0  0  0  0
 16 17  1  0  0  0  0
 17 18  2  0  0  0  0
  1 19  1  0  0  0  0
  1 20  1  0  0  0  0
  2 21  1  0  0  0  0
  3 22  1  0  0  0  0
  3 23  1  0  0  0  0
 12 24  1  0  0  0  0
 12 25  1  0  0  0  0
 13 26  1  0  0  0  0
 14 27  1  0  0  0  0
 14 28  1  0  0  0  0
 16 29  1  0  0  0  0
 16 30  1  0  0  0  0
 17 31  1  0  0  0  0
 18 32  1  0  0  0  0
 18 33  1  0  0  0  0
M  END
$$$$
30
  Mrv0541 12152312282D          

 24 24  0  0  0  0            999 V2000
   -0.7145    3.7125    0.0000 C   0  0  0  0  0  0  0  0  0  0  0  0
    0.0000    3.3000    0.0000 N   0  0  0  0  0  0  0  0  0  0  0  0
    0.7145    3.7125    0.0000 C   0  0  0  0  0  0  0  0  0  0  0  0
    0.0000    2.4750    0.0000 C   0  0  0  0  0  0  0  0  0  0  0  0
   -0.7145    2.0625    0.0000 O   0  0  0  0  0  0  0  0  0  0  0  0
    0.7145    2.0625    0.0000 N   0  0  0  0  0  0  0  0  0  0  0  0
    0.7145    1.2375    0.0000 C   0  0  0  0  0  0  0  0  0  0  0  0
    1.4289    0.8250    0.0000 C   0  0  0  0  0  0  0  0  0  0  0  0
    1.4289   -0.0000    0.0000 C   0  0  0  0  0  0  0  0  0  0  0  0
    0.7145   -0.4125    0.0000 C   0  0  0  0  0  0  0  0  0  0  0  0
    0.0000    0.0000    0.0000 C   0  0  0  0  0  0  0  0  0  0  0  0
    0.0000    0.8250    0.0000 C   0  0  0  0  0  0  0  0  0  0  0  0
   -0.3020    4.4270    0.0000 H   0  0  0  0  0  0  0  0  0  0  0  0
   -1.4289    4.1250    0.0000 H   0  0  0  0  0  0  0  0  0  0  0  0
   -1.1270    2.9980    0.0000 H   0  0  0  0  0  0  0  0  0  0  0  0
    1.1270    2.9980    0.0000 H   0  0  0  0  0  0  0  0  0  0  0  0
    1.4289    4.1250    0.0000 H   0  0  0  0  0  0  0  0  0  0  0  0
    0.3020    4.4270    0.0000 H   0  0  0  0  0  0  0  0  0  0  0  0
    1.4289    2.4750    0.0000 H   0  0  0  0  0  0  0  0  0  0  0  0
    2.1434    1.2375    0.0000 H   0  0  0  0  0  0  0  0  0  0  0  0
    2.1434   -0.4125    0.0000 H   0  0  0  0  0  0  0  0  0  0  0  0
    0.7145   -1.2375    0.0000 H   0  0  0  0  0  0  0  0  0  0  0  0
   -0.7145   -0.4125    0.0000 H   0  0  0  0  0  0  0  0  0  0  0  0
   -0.7145    1.2375    0.0000 H   0  0  0  0  0  0  0  0  0  0  0  0
  1  2  1  0  0  0  0
  2  3  1  0  0  0  0
  2  4  1  0  0  0  0
  4  5  2  0  0  0  0
  4  6  1  0  0  0  0
  6  7  1  0  0  0  0
  7  8  4  0  0  0  0
  8  9  4  0  0  0  0
  9 10  4  0  0  0  0
 10 11  4  0  0  0  0
 11 12  4  0  0  0  0
  7 12  4  0  0  0  0
  1 13  1  0  0  0  0
  1 14  1  0  0  0  0
  1 15  1  0  0  0  0
  3 16  1  0  0  0  0
  3 17  1  0  0  0  0
  3 18  1  0  0  0  0
  6 19  1  0  0  0  0
  8 20  1  0  0  0  0
  9 21  1  0  0  0  0
 10 22  1  0  0  0  0
 11 23  1  0  0  0  0
 12 24  1  0  0  0  0
M  END
$$$$
31
  Mrv0541 12152312282D          

 26 27  0  0  0  0            999 V2000
    2.1434   -1.2375    0.0000 C   0  0  0  0  0  0  0  0  0  0  0  0
    2.8579   -1.6500    0.0000 C   0  0  0  0  0  0  0  0  0  0  0  0
    2.8579   -2.4750    0.0000 C   0  0  0  0  0  0  0  0  0  0  0  0
    2.1434   -2.8875    0.0000 C   0  0  0  0  0  0  0  0  0  0  0  0
    1.4289   -2.4750    0.0000 C   0  0  0  0  0  0  0  0  0  0  0  0
    1.4289   -1.6500    0.0000 C   0  0  0  0  0  0  0  0  0  0  0  0
    2.1434   -3.7125    0.0000 N   0  0  0  0  0  0  0  0  0  0  0  0
    1.4289   -4.1250    0.0000 C   0  0  0  0  0  0  0  0  0  0  0  0
    1.4289   -4.9500    0.0000 C   0  0  0  0  0  0  0  0  0  0  0  0
    0.7145   -5.3625    0.0000 C   0  0  0  0  0  0  0  0  0  0  0  0
   -0.0000   -4.9500    0.0000 C   0  0  0  0  0  0  0  0  0  0  0  0
   -0.0000   -4.1250    0.0000 C   0  0  0  0  0  0  0  0  0  0  0  0
    0.7145   -3.7125    0.0000 C   0  0  0  0  0  0  0  0  0  0  0  0
   -0.7145   -5.3625    0.0000 N   0  0  0  0  0  0  0  0  0  0  0  0
    2.1434   -0.4125    0.0000 H   0  0  0  0  0  0  0  0  0  0  0  0
    3.5724   -1.2375    0.0000 H   0  0  0  0  0  0  0  0  0  0  0  0
    3.5724   -2.8875    0.0000 H   0  0  0  0  0  0  0  0  0  0  0  0
    0.8986   -3.1070    0.0000 H   0  0  0  0  0  0  0  0  0  0  0  0
    0.7145   -1.2375    0.0000 H   0  0  0  0  0  0  0  0  0  0  0  0
    2.8579   -4.1250    0.0000 H   0  0  0  0  0  0  0  0  0  0  0  0
    2.1434   -5.3625    0.0000 H   0  0  0  0  0  0  0  0  0  0  0  0
    0.7145   -6.1875    0.0000 H   0  0  0  0  0  0  0  0  0  0  0  0
   -0.7145   -3.7125    0.0000 H   0  0  0  0  0  0  0  0  0  0  0  0
    0.7145   -2.8875    0.0000 H   0  0  0  0  0  0  0  0  0  0  0  0
   -1.4289   -4.9500    0.0000 H   0  0  0  0  0  0  0  0  0  0  0  0
   -0.7145   -6.1875    0.0000 H   0  0  0  0  0  0  0  0  0  0  0  0
  1  2  4  0  0  0  0
  2  3  4  0  0  0  0
  3  4  4  0  0  0  0
  4  5  4  0  0  0  0
  5  6  4  0  0  0  0
  1  6  4  0  0  0  0
  4  7  1  0  0  0  0
  7  8  1  0  0  0  0
  8  9  4  0  0  0  0
  9 10  4  0  0  0  0
 10 11  4  0  0  0  0
 11 12  4  0  0  0  0
 12 13  4  0  0  0  0
  8 13  4  0  0  0  0
 11 14  1  0  0  0  0
  1 15  1  0  0  0  0
  2 16  1  0  0  0  0
  3 17  1  0  0  0  0
  5 18  1  0  0  0  0
  6 19  1  0  0  0  0
  7 20  1  0  0  0  0
  9 21  1  0  0  0  0
 10 22  1  0  0  0  0
 12 23  1  0  0  0  0
 13 24  1  0  0  0  0
 14 25  1  0  0  0  0
 14 26  1  0  0  0  0
M  END
$$$$
32
  Mrv0541 12152312282D          

 41 42  0  0  0  0            999 V2000
    1.4289    0.0000    0.0000 C   0  0  0  0  0  0  0  0  0  0  0  0
    2.1434   -0.4125    0.0000 N   0  0  0  0  0  0  0  0  0  0  0  0
    2.8579    0.0000    0.0000 C   0  0  0  0  0  0  0  0  0  0  0  0
    2.1434   -1.2375    0.0000 C   0  0  0  0  0  0  0  0  0  0  0  0
    2.8579   -1.6500    0.0000 C   0  0  0  0  0  0  0  0  0  0  0  0
    2.8579   -2.4750    0.0000 C   0  0  0  0  0  0  0  0  0  0  0  0
    2.1434   -2.8875    0.0000 C   0  0  0  0  0  0  0  0  0  0  0  0
    1.4289   -2.4750    0.0000 C   0  0  0  0  0  0  0  0  0  0  0  0
    1.4289   -1.6500    0.0000 C   0  0  0  0  0  0  0  0  0  0  0  0
    2.1434   -3.7125    0.0000 C   0  0  0  0  0  0  0  0  0  0  0  0
    1.4289   -4.1250    0.0000 C   0  0  0  0  0  0  0  0  0  0  0  0
    1.4289   -4.9500    0.0000 C   0  0  0  0  0  0  0  0  0  0  0  0
    0.7145   -5.3625    0.0000 C   0  0  0  0  0  0  0  0  0  0  0  0
   -0.0000   -4.9500    0.0000 C   0  0  0  0  0  0  0  0  0  0  0  0
   -0.0000   -4.1250    0.0000 C   0  0  0  0  0  0  0  0  0  0  0  0
    0.7145   -3.7125    0.0000 C   0  0  0  0  0  0  0  0  0  0  0  0
   -0.7145   -5.3625    0.0000 N   0  0  0  0  0  0  0  0  0  0  0  0
   -0.7145   -6.1875    0.0000 C   0  0  0  0  0  0  0  0  0  0  0  0
   -1.4289   -4.9500    0.0000 C   0  0  0  0  0  0  0  0  0  0  0  0
    1.8414    0.7145    0.0000 H   0  0  0  0  0  0  0  0  0  0  0  0
    0.7145    0.4125    0.0000 H   0  0  0  0  0  0  0  0  0  0  0  0
    1.0164   -0.7145    0.0000 H   0  0  0  0  0  0  0  0  0  0  0  0
    3.2704   -0.7145    0.0000 H   0  0  0  0  0  0  0  0  0  0  0  0
    3.5724    0.4125    0.0000 H   0  0  0  0  0  0  0  0  0  0  0  0
    2.4454    0.7145    0.0000 H   0  0  0  0  0  0  0  0  0  0  0  0
    3.5724   -1.2375    0.0000 H   0  0  0  0  0  0  0  0  0  0  0  0
    3.5724   -2.8875    0.0000 H   0  0  0  0  0  0  0  0  0  0  0  0
    0.8986   -3.1070    0.0000 H   0  0  0  0  0  0  0  0  0  0  0  0
    0.7145   -1.2375    0.0000 H   0  0  0  0  0  0  0  0  0  0  0  0
    2.9679   -3.7413    0.0000 H   0  0  0  0  0  0  0  0  0  0  0  0
    2.5806   -4.4121    0.0000 H   0  0  0  0  0  0  0  0  0  0  0  0
    2.1434   -5.3625    0.0000 H   0  0  0  0  0  0  0  0  0  0  0  0
    0.7145   -6.1875    0.0000 H   0  0  0  0  0  0  0  0  0  0  0  0
   -0.7145   -3.7125    0.0000 H   0  0  0  0  0  0  0  0  0  0  0  0
    0.7145   -2.8875    0.0000 H   0  0  0  0  0  0  0  0  0  0  0  0
   -1.5395   -6.1875    0.0000 H   0  0  0  0  0  0  0  0  0  0  0  0
   -0.7145   -7.0125    0.0000 H   0  0  0  0  0  0  0  0  0  0  0  0
    0.1105   -6.1875    0.0000 H   0  0  0  0  0  0  0  0  0  0  0  0
   -1.0164   -4.2355    0.0000 H   0  0  0  0  0  0  0  0  0  0  0  0
   -2.1434   -4.5375    0.0000 H   0  0  0  0  0  0  0  0  0  0  0  0
   -1.8414   -5.6645    0.0000 H   0  0  0  0  0  0  0  0  0  0  0  0
  1  2  1  0  0  0  0
  2  3  1  0  0  0  0
  2  4  1  0  0  0  0
  4  5  4  0  0  0  0
  5  6  4  0  0  0  0
  6  7  4  0  0  0  0
  7  8  4  0  0  0  0
  8  9  4  0  0  0  0
  4  9  4  0  0  0  0
  7 10  1  0  0  0  0
 10 11  1  0  0  0  0
 11 12  4  0  0  0  0
 12 13  4  0  0  0  0
 13 14  4  0  0  0  0
 14 15  4  0  0  0  0
 15 16  4  0  0  0  0
 11 16  4  0  0  0  0
 14 17  1  0  0  0  0
 17 18  1  0  0  0  0
 17 19  1  0  0  0  0
  1 20  1  0  0  0  0
  1 21  1  0  0  0  0
  1 22  1  0  0  0  0
  3 23  1  0  0  0  0
  3 24  1  0  0  0  0
  3 25  1  0  0  0  0
  5 26  1  0  0  0  0
  6 27  1  0  0  0  0
  8 28  1  0  0  0  0
  9 29  1  0  0  0  0
 10 30  1  0  0  0  0
 10 31  1  0  0  0  0
 12 32  1  0  0  0  0
 13 33  1  0  0  0  0
 15 34  1  0  0  0  0
 16 35  1  0  0  0  0
 18 36  1  0  0  0  0
 18 37  1  0  0  0  0
 18 38  1  0  0  0  0
 19 39  1  0  0  0  0
 19 40  1  0  0  0  0
 19 41  1  0  0  0  0
M  END
$$$$
33
  Mrv0541 12152312282D          

 42 45  0  0  1  0            999 V2000
    1.3895   -1.8497    0.0000 C   0  0  0  0  0  0  0  0  0  0  0  0
    1.7494   -2.5921    0.0000 C   0  0  2  0  0  0  0  0  0  0  0  0
    2.2812   -1.9614    0.0000 C   0  0  0  0  0  0  0  0  0  0  0  0
    3.0934   -2.1066    0.0000 C   0  0  0  0  0  0  0  0  0  0  0  0
    3.3737   -2.8825    0.0000 C   0  0  0  0  0  0  0  0  0  0  0  0
    4.1858   -3.0277    0.0000 C   0  0  0  0  0  0  0  0  0  0  0  0
    4.7176   -2.3970    0.0000 C   0  0  0  0  0  0  0  0  0  0  0  0
    5.5297   -2.5422    0.0000 C   0  0  0  0  0  0  0  0  0  0  0  0
    5.8100   -3.3182    0.0000 C   0  0  0  0  0  0  0  0  0  0  0  0
    6.6221   -3.4634    0.0000 O   0  0  0  0  0  0  0  0  0  0  0  0
    5.2782   -3.9489    0.0000 C   0  0  0  0  0  0  0  0  0  0  0  0
    4.4661   -3.8037    0.0000 C   0  0  0  0  0  0  0  0  0  0  0  0
    3.9343   -4.4344    0.0000 C   0  0  0  0  0  0  0  0  0  0  0  0
    3.1221   -4.2891    0.0000 C   0  0  0  0  0  0  0  0  0  0  0  0
    2.8418   -3.5132    0.0000 C   0  0  1  0  0  0  0  0  0  0  0  0
    2.0297   -3.3680    0.0000 C   0  0  2  0  0  0  0  0  0  0  0  0
    1.3784   -3.8744    0.0000 C   0  0  0  0  0  0  0  0  0  0  0  0
    0.6955   -3.4114    0.0000 C   0  0  0  0  0  0  0  0  0  0  0  0
    0.9249   -2.6189    0.0000 C   0  0  2  0  0  0  0  0  0  0  0  0
    0.4185   -1.9676    0.0000 O   0  0  0  0  0  0  0  0  0  0  0  0
    2.1319   -1.4898    0.0000 H   0  0  0  0  0  0  0  0  0  0  0  0
    1.0297   -1.1073    0.0000 H   0  0  0  0  0  0  0  0  0  0  0  0
    0.6472   -2.2096    0.0000 H   0  0  0  0  0  0  0  0  0  0  0  0
    2.0009   -1.1854    0.0000 H   0  0  0  0  0  0  0  0  0  0  0  0
    3.6252   -1.4759    0.0000 H   0  0  0  0  0  0  0  0  0  0  0  0
    4.1058   -1.8435    0.0000 H   0  0  0  0  0  0  0  0  0  0  0  0
    4.8344   -1.5803    0.0000 H   0  0  0  0  0  0  0  0  0  0  0  0
    5.7032   -1.7357    0.0000 H   0  0  0  0  0  0  0  0  0  0  0  0
    6.2954   -2.2350    0.0000 H   0  0  0  0  0  0  0  0  0  0  0  0
    5.5585   -4.7248    0.0000 H   0  0  0  0  0  0  0  0  0  0  0  0
    4.5460   -4.9879    0.0000 H   0  0  0  0  0  0  0  0  0  0  0  0
    3.8175   -5.2511    0.0000 H   0  0  0  0  0  0  0  0  0  0  0  0
    2.9487   -5.0957    0.0000 H   0  0  0  0  0  0  0  0  0  0  0  0
    2.3565   -4.5964    0.0000 H   0  0  0  0  0  0  0  0  0  0  0  0
    2.5578   -4.2878    0.0000 H   0  0  0  0  0  0  0  0  0  0  0  0
    1.9415   -4.1883    0.0000 H   0  0  0  0  0  0  0  0  0  0  0  0
    1.8065   -4.5796    0.0000 H   0  0  0  0  0  0  0  0  0  0  0  0
    0.9970   -4.6059    0.0000 H   0  0  0  0  0  0  0  0  0  0  0  0
    0.1572   -4.0365    0.0000 H   0  0  0  0  0  0  0  0  0  0  0  0
   -0.1181   -3.2747    0.0000 H   0  0  0  0  0  0  0  0  0  0  0  0
    0.1146   -2.7744    0.0000 H   0  0  0  0  0  0  0  0  0  0  0  0
    0.7294   -1.2034    0.0000 H   0  0  0  0  0  0  0  0  0  0  0  0
  2  1  1  6  0  0  0
  2  3  1  0  0  0  0
  3  4  2  0  0  0  0
  4  5  1  0  0  0  0
  5  6  2  0  0  0  0
  6  7  1  0  0  0  0
  7  8  1  0  0  0  0
  8  9  1  0  0  0  0
  9 10  2  0  0  0  0
  9 11  1  0  0  0  0
 11 12  2  0  0  0  0
  6 12  1  0  0  0  0
 12 13  1  0  0  0  0
 13 14  1  0  0  0  0
 14 15  1  0  0  0  0
  5 15  1  0  0  0  0
 15 16  1  0  0  0  0
  2 16  1  0  0  0  0
 16 17  1  0  0  0  0
 17 18  1  0  0  0  0
 18 19  1  0  0  0  0
  2 19  1  0  0  0  0
 19 20  1  6  0  0  0
  1 21  1  0  0  0  0
  1 22  1  0  0  0  0
  1 23  1  0  0  0  0
  3 24  1  0  0  0  0
  4 25  1  0  0  0  0
  7 26  1  0  0  0  0
  7 27  1  0  0  0  0
  8 28  1  0  0  0  0
  8 29  1  0  0  0  0
 11 30  1  0  0  0  0
 13 31  1  0  0  0  0
 13 32  1  0  0  0  0
 14 33  1  0  0  0  0
 14 34  1  0  0  0  0
 15 35  1  6  0  0  0
 16 36  1  1  0  0  0
 17 37  1  0  0  0  0
 17 38  1  0  0  0  0
 18 39  1  0  0  0  0
 18 40  1  0  0  0  0
 19 41  1  1  0  0  0
 20 42  1  0  0  0  0
M  END
$$$$
34
  Mrv0541 12152312282D          

 29 30  0  0  0  0            999 V2000
   -0.7145   -1.2375    0.0000 C   0  0  0  0  0  0  0  0  0  0  0  0
    0.0000   -1.6500    0.0000 C   0  0  0  0  0  0  0  0  0  0  0  0
    0.0000   -2.4750    0.0000 C   0  0  0  0  0  0  0  0  0  0  0  0
   -0.7145   -2.8875    0.0000 C   0  0  0  0  0  0  0  0  0  0  0  0
   -1.4289   -2.4750    0.0000 C   0  0  0  0  0  0  0  0  0  0  0  0
   -1.4289   -1.6500    0.0000 C   0  0  0  0  0  0  0  0  0  0  0  0
   -2.1434   -1.2375    0.0000 C   0  0  0  0  0  0  0  0  0  0  0  0
   -2.8579   -1.6500    0.0000 C   0  0  0  0  0  0  0  0  0  0  0  0
   -2.8579   -2.4750    0.0000 C   0  0  0  0  0  0  0  0  0  0  0  0
   -3.5724   -2.8875    0.0000 C   0  0  0  0  0  0  0  0  0  0  0  0
   -4.2868   -2.4750    0.0000 C   0  0  0  0  0  0  0  0  0  0  0  0
   -4.2868   -1.6500    0.0000 C   0  0  0  0  0  0  0  0  0  0  0  0
   -3.5724   -1.2375    0.0000 C   0  0  0  0  0  0  0  0  0  0  0  0
   -5.0013   -2.8875    0.0000 N   0  0  0  0  0  0  0  0  0  0  0  0
    0.7145   -2.8875    0.0000 N   0  0  0  0  0  0  0  0  0  0  0  0
   -0.7145   -0.4125    0.0000 H   0  0  0  0  0  0  0  0  0  0  0  0
    0.7145   -1.2375    0.0000 H   0  0  0  0  0  0  0  0  0  0  0  0
   -0.7145   -3.7125    0.0000 H   0  0  0  0  0  0  0  0  0  0  0  0
   -1.9592   -3.1070    0.0000 H   0  0  0  0  0  0  0  0  0  0  0  0
   -1.7561   -0.5091    0.0000 H   0  0  0  0  0  0  0  0  0  0  0  0
   -2.5307   -0.5091    0.0000 H   0  0  0  0  0  0  0  0  0  0  0  0
   -2.3276   -3.1070    0.0000 H   0  0  0  0  0  0  0  0  0  0  0  0
   -3.5724   -3.7125    0.0000 H   0  0  0  0  0  0  0  0  0  0  0  0
   -5.0013   -1.2375    0.0000 H   0  0  0  0  0  0  0  0  0  0  0  0
   -3.5724   -0.4125    0.0000 H   0  0  0  0  0  0  0  0  0  0  0  0
   -5.7158   -2.4750    0.0000 H   0  0  0  0  0  0  0  0  0  0  0  0
   -5.0013   -3.7125    0.0000 H   0  0  0  0  0  0  0  0  0  0  0  0
    0.7145   -3.7125    0.0000 H   0  0  0  0  0  0  0  0  0  0  0  0
    1.4289   -2.4750    0.0000 H   0  0  0  0  0  0  0  0  0  0  0  0
  1  2  4  0  0  0  0
  2  3  4  0  0  0  0
  3  4  4  0  0  0  0
  4  5  4  0  0  0  0
  5  6  4  0  0  0  0
  1  6  4  0  0  0  0
  6  7  1  0  0  0  0
  7  8  1  0  0  0  0
  8  9  4  0  0  0  0
  9 10  4  0  0  0  0
 10 11  4  0  0  0  0
 11 12  4  0  0  0  0
 12 13  4  0  0  0  0
  8 13  4  0  0  0  0
 11 14  1  0  0  0  0
  3 15  1  0  0  0  0
  1 16  1  0  0  0  0
  2 17  1  0  0  0  0
  4 18  1  0  0  0  0
  5 19  1  0  0  0  0
  7 20  1  0  0  0  0
  7 21  1  0  0  0  0
  9 22  1  0  0  0  0
 10 23  1  0  0  0  0
 12 24  1  0  0  0  0
 13 25  1  0  0  0  0
 14 26  1  0  0  0  0
 14 27  1  0  0  0  0
 15 28  1  0  0  0  0
 15 29  1  0  0  0  0
M  END
$$$$
35
  Mrv0541 12152312282D          

 27 28  0  0  0  0            999 V2000
    2.1434   -1.2375    0.0000 C   0  0  0  0  0  0  0  0  0  0  0  0
    2.8579   -1.6500    0.0000 C   0  0  0  0  0  0  0  0  0  0  0  0
    2.8579   -2.4750    0.0000 C   0  0  0  0  0  0  0  0  0  0  0  0
    2.1434   -2.8875    0.0000 C   0  0  0  0  0  0  0  0  0  0  0  0
    1.4289   -2.4750    0.0000 C   0  0  0  0  0  0  0  0  0  0  0  0
    1.4289   -1.6500    0.0000 C   0  0  0  0  0  0  0  0  0  0  0  0
    0.7145   -1.2375    0.0000 N   0  0  0  0  0  0  0  0  0  0  0  0
    3.5724   -2.8875    0.0000 O   0  0  0  0  0  0  0  0  0  0  0  0
    3.5724   -3.7125    0.0000 C   0  0  0  0  0  0  0  0  0  0  0  0
    4.2868   -4.1250    0.0000 C   0  0  0  0  0  0  0  0  0  0  0  0
    4.2868   -4.9500    0.0000 C   0  0  0  0  0  0  0  0  0  0  0  0
    3.5724   -5.3625    0.0000 C   0  0  0  0  0  0  0  0  0  0  0  0
    2.8579   -4.9500    0.0000 C   0  0  0  0  0  0  0  0  0  0  0  0
    2.8579   -4.1250    0.0000 C   0  0  0  0  0  0  0  0  0  0  0  0
    3.5724   -6.1875    0.0000 N   0  0  0  0  0  0  0  0  0  0  0  0
    2.1434   -0.4125    0.0000 H   0  0  0  0  0  0  0  0  0  0  0  0
    3.5724   -1.2375    0.0000 H   0  0  0  0  0  0  0  0  0  0  0  0
    2.4256   -3.6627    0.0000 H   0  0  0  0  0  0  0  0  0  0  0  0
    0.7145   -2.8875    0.0000 H   0  0  0  0  0  0  0  0  0  0  0  0
    0.7145   -0.4125    0.0000 H   0  0  0  0  0  0  0  0  0  0  0  0
    0.0000   -1.6500    0.0000 H   0  0  0  0  0  0  0  0  0  0  0  0
    5.0013   -3.7125    0.0000 H   0  0  0  0  0  0  0  0  0  0  0  0
    5.0013   -5.3625    0.0000 H   0  0  0  0  0  0  0  0  0  0  0  0
    2.1434   -5.3625    0.0000 H   0  0  0  0  0  0  0  0  0  0  0  0
    2.1434   -3.7125    0.0000 H   0  0  0  0  0  0  0  0  0  0  0  0
    2.8579   -6.6000    0.0000 H   0  0  0  0  0  0  0  0  0  0  0  0
    4.2868   -6.6000    0.0000 H   0  0  0  0  0  0  0  0  0  0  0  0
  1  2  4  0  0  0  0
  2  3  4  0  0  0  0
  3  4  4  0  0  0  0
  4  5  4  0  0  0  0
  5  6  4  0  0  0  0
  1  6  4  0  0  0  0
  6  7  1  0  0  0  0
  3  8  1  0  0  0  0
  8  9  1  0  0  0  0
  9 10  4  0  0  0  0
 10 11  4  0  0  0  0
 11 12  4  0  0  0  0
 12 13  4  0  0  0  0
 13 14  4  0  0  0  0
  9 14  4  0  0  0  0
 12 15  1  0  0  0  0
  1 16  1  0  0  0  0
  2 17  1  0  0  0  0
  4 18  1  0  0  0  0
  5 19  1  0  0  0  0
  7 20  1  0  0  0  0
  7 21  1  0  0  0  0
 10 22  1  0  0  0  0
 11 23  1  0  0  0  0
 13 24  1  0  0  0  0
 14 25  1  0  0  0  0
 15 26  1  0  0  0  0
 15 27  1  0  0  0  0
M  END
$$$$
36
  Mrv0541 12152312282D          

 36 36  0  0  0  0            999 V2000
    4.2868   -0.8250    0.0000 C   0  0  0  0  0  0  0  0  0  0  0  0
    5.0013   -1.2375    0.0000 C   0  0  0  0  0  0  0  0  0  0  0  0
    5.7158   -0.8250    0.0000 C   0  0  0  0  0  0  0  0  0  0  0  0
    6.4302   -1.2375    0.0000 C   0  0  0  0  0  0  0  0  0  0  0  0
    7.1447   -0.8250    0.0000 C   0  0  0  0  0  0  0  0  0  0  0  0
    7.8592   -1.2375    0.0000 C   0  0  0  0  0  0  0  0  0  0  0  0
    8.5737   -0.8250    0.0000 C   0  0  0  0  0  0  0  0  0  0  0  0
    9.2881   -1.2375    0.0000 C   0  0  0  0  0  0  0  0  0  0  0  0
    9.2881   -2.0625    0.0000 C   0  0  0  0  0  0  0  0  0  0  0  0
   10.0026   -2.4750    0.0000 C   0  0  0  0  0  0  0  0  0  0  0  0
   10.0026   -3.3000    0.0000 C   0  0  0  0  0  0  0  0  0  0  0  0
    9.2881   -3.7125    0.0000 C   0  0  0  0  0  0  0  0  0  0  0  0
    8.5737   -3.3000    0.0000 C   0  0  0  0  0  0  0  0  0  0  0  0
    8.5737   -2.4750    0.0000 C   0  0  0  0  0  0  0  0  0  0  0  0
    8.5737    0.0000    0.0000 C   0  0  0  0  0  0  0  0  0  0  0  0
    9.2881    0.4125    0.0000 O   0  0  0  0  0  0  0  0  0  0  0  0
    4.6993   -0.1105    0.0000 H   0  0  0  0  0  0  0  0  0  0  0  0
    3.5724   -0.4125    0.0000 H   0  0  0  0  0  0  0  0  0  0  0  0
    3.8743   -1.5395    0.0000 H   0  0  0  0  0  0  0  0  0  0  0  0
    4.6140   -1.9659    0.0000 H   0  0  0  0  0  0  0  0  0  0  0  0
    5.3886   -1.9659    0.0000 H   0  0  0  0  0  0  0  0  0  0  0  0
    5.3285   -0.0966    0.0000 H   0  0  0  0  0  0  0  0  0  0  0  0
    6.1031   -0.0966    0.0000 H   0  0  0  0  0  0  0  0  0  0  0  0
    6.0429   -1.9659    0.0000 H   0  0  0  0  0  0  0  0  0  0  0  0
    6.8176   -1.9659    0.0000 H   0  0  0  0  0  0  0  0  0  0  0  0
    6.7574   -0.0966    0.0000 H   0  0  0  0  0  0  0  0  0  0  0  0
    7.5320   -0.0966    0.0000 H   0  0  0  0  0  0  0  0  0  0  0  0
    7.4719   -1.9659    0.0000 H   0  0  0  0  0  0  0  0  0  0  0  0
    8.2465   -1.9659    0.0000 H   0  0  0  0  0  0  0  0  0  0  0  0
   10.0026   -0.8250    0.0000 H   0  0  0  0  0  0  0  0  0  0  0  0
   10.7171   -2.0625    0.0000 H   0  0  0  0  0  0  0  0  0  0  0  0
   10.7171   -3.7125    0.0000 H   0  0  0  0  0  0  0  0  0  0  0  0
    9.2881   -4.5375    0.0000 H   0  0  0  0  0  0  0  0  0  0  0  0
    7.8592   -3.7125    0.0000 H   0  0  0  0  0  0  0  0  0  0  0  0
    7.8592   -2.0625    0.0000 H   0  0  0  0  0  0  0  0  0  0  0  0
    7.8592    0.4125    0.0000 H   0  0  0  0  0  0  0  0  0  0  0  0
  1  2  1  0  0  0  0
  2  3  1  0  0  0  0
  3  4  1  0  0  0  0
  4  5  1  0  0  0  0
  5  6  1  0  0  0  0
  6  7  1  0  0  0  0
  7  8  2  0  0  0  0
  8  9  1  0  0  0  0
  9 10  4  0  0  0  0
 10 11  4  0  0  0  0
 11 12  4  0  0  0  0
 12 13  4  0  0  0  0
 13 14  4  0  0  0  0
  9 14  4  0  0  0  0
  7 15  1  0  0  0  0
 15 16  2  0  0  0  0
  1 17  1  0  0  0  0
  1 18  1  0  0  0  0
  1 19  1  0  0  0  0
  2 20  1  0  0  0  0
  2 21  1  0  0  0  0
  3 22  1  0  0  0  0
  3 23  1  0  0  0  0
  4 24  1  0  0  0  0
  4 25  1  0  0  0  0
  5 26  1  0  0  0  0
  5 27  1  0  0  0  0
  6 28  1  0  0  0  0
  6 29  1  0  0  0  0
  8 30  1  0  0  0  0
 10 31  1  0  0  0  0
 11 32  1  0  0  0  0
 12 33  1  0  0  0  0
 13 34  1  0  0  0  0
 14 35  1  0  0  0  0
 15 36  1  0  0  0  0
M  END
$$$$
37
  Mrv0541 12152312282D          

 53 56  0  0  0  0            999 V2000
    1.4289   -2.4750    0.0000 C   0  0  0  0  0  0  0  0  0  0  0  0
    2.1434   -2.8875    0.0000 C   0  0  0  0  0  0  0  0  0  0  0  0
    2.1434   -3.7125    0.0000 N   0  0  0  0  0  0  0  0  0  0  0  0
    1.4289   -4.1250    0.0000 C   0  0  0  0  0  0  0  0  0  0  0  0
    0.7145   -3.7125    0.0000 C   0  0  0  0  0  0  0  0  0  0  0  0
    0.7145   -2.8875    0.0000 C   0  0  0  0  0  0  0  0  0  0  0  0
    0.0000   -2.4750    0.0000 C   0  0  0  0  0  0  0  0  0  0  0  0
    0.0000   -1.6500    0.0000 C   0  0  0  0  0  0  0  0  0  0  0  0
   -0.7145   -1.2375    0.0000 C   0  0  0  0  0  0  0  0  0  0  0  0
   -0.7145   -0.4125    0.0000 C   0  0  0  0  0  0  0  0  0  0  0  0
    0.0000    0.0000    0.0000 C   0  0  0  0  0  0  0  0  0  0  0  0
    0.7145   -0.4125    0.0000 C   0  0  0  0  0  0  0  0  0  0  0  0
    0.7145   -1.2375    0.0000 C   0  0  0  0  0  0  0  0  0  0  0  0
   -1.4289    0.0000    0.0000 O   0  0  0  0  0  0  0  0  0  0  0  0
   -1.4289    0.8250    0.0000 C   0  0  0  0  0  0  0  0  0  0  0  0
   -2.1434    1.2375    0.0000 N   0  0  0  0  0  0  0  0  0  0  0  0
   -2.1434    2.0625    0.0000 C   0  0  0  0  0  0  0  0  0  0  0  0
   -1.4289    2.4750    0.0000 C   0  0  0  0  0  0  0  0  0  0  0  0
   -0.7145    2.0625    0.0000 C   0  0  0  0  0  0  0  0  0  0  0  0
   -0.7145    1.2375    0.0000 C   0  0  0  0  0  0  0  0  0  0  0  0
   -1.4289    3.3000    0.0000 C   0  0  0  0  0  0  0  0  0  0  0  0
   -1.4289    4.1250    0.0000 F   0  0  0  0  0  0  0  0  0  0  0  0
   -2.2539    3.3000    0.0000 F   0  0  0  0  0  0  0  0  0  0  0  0
   -0.6039    3.3000    0.0000 F   0  0  0  0  0  0  0  0  0  0  0  0
    2.8579   -4.1250    0.0000 C   0  0  0  0  0  0  0  0  0  0  0  0
    2.8579   -4.9500    0.0000 O   0  0  0  0  0  0  0  0  0  0  0  0
    3.5724   -3.7125    0.0000 N   0  0  0  0  0  0  0  0  0  0  0  0
    4.2868   -4.1250    0.0000 C   0  0  0  0  0  0  0  0  0  0  0  0
    5.0013   -3.7125    0.0000 N   0  0  0  0  0  0  0  0  0  0  0  0
    5.7158   -4.1250    0.0000 N   0  0  0  0  0  0  0  0  0  0  0  0
    5.7158   -4.9500    0.0000 C   0  0  0  0  0  0  0  0  0  0  0  0
    5.0013   -5.3625    0.0000 C   0  0  0  0  0  0  0  0  0  0  0  0
    4.2868   -4.9500    0.0000 C   0  0  0  0  0  0  0  0  0  0  0  0
    1.8163   -1.7466    0.0000 H   0  0  0  0  0  0  0  0  0  0  0  0
    1.0416   -1.7466    0.0000 H   0  0  0  0  0  0  0  0  0  0  0  0
    2.5806   -2.1879    0.0000 H   0  0  0  0  0  0  0  0  0  0  0  0
    2.9679   -2.8587    0.0000 H   0  0  0  0  0  0  0  0  0  0  0  0
    1.8163   -4.8534    0.0000 H   0  0  0  0  0  0  0  0  0  0  0  0
    1.0416   -4.8534    0.0000 H   0  0  0  0  0  0  0  0  0  0  0  0
    0.2773   -4.4121    0.0000 H   0  0  0  0  0  0  0  0  0  0  0  0
   -0.1100   -3.7413    0.0000 H   0  0  0  0  0  0  0  0  0  0  0  0
   -0.7145   -2.8875    0.0000 H   0  0  0  0  0  0  0  0  0  0  0  0
   -1.4289   -1.6500    0.0000 H   0  0  0  0  0  0  0  0  0  0  0  0
   -0.2822    0.7752    0.0000 H   0  0  0  0  0  0  0  0  0  0  0  0
    1.4289   -0.0000    0.0000 H   0  0  0  0  0  0  0  0  0  0  0  0
    1.4289   -1.6500    0.0000 H   0  0  0  0  0  0  0  0  0  0  0  0
   -2.8579    2.4750    0.0000 H   0  0  0  0  0  0  0  0  0  0  0  0
    0.0000    2.4750    0.0000 H   0  0  0  0  0  0  0  0  0  0  0  0
    0.0000    0.8250    0.0000 H   0  0  0  0  0  0  0  0  0  0  0  0
    3.5724   -2.8875    0.0000 H   0  0  0  0  0  0  0  0  0  0  0  0
    6.4302   -5.3625    0.0000 H   0  0  0  0  0  0  0  0  0  0  0  0
    5.0013   -6.1875    0.0000 H   0  0  0  0  0  0  0  0  0  0  0  0
    3.5724   -5.3625    0.0000 H   0  0  0  0  0  0  0  0  0  0  0  0
  1  2  1  0  0  0  0
  2  3  1  0  0  0  0
  3  4  1  0  0  0  0
  4  5  1  0  0  0  0
  5  6  1  0  0  0  0
  1  6  1  0  0  0  0
  6  7  2  0  0  0  0
  7  8  1  0  0  0  0
  8  9  4  0  0  0  0
  9 10  4  0  0  0  0
 10 11  4  0  0  0  0
 11 12  4  0  0  0  0
 12 13  4  0  0  0  0
  8 13  4  0  0  0  0
 10 14  1  0  0  0  0
 14 15  1  0  0  0  0
 15 16  4  0  0  0  0
 16 17  4  0  0  0  0
 17 18  4  0  0  0  0
 18 19  4  0  0  0  0
 19 20  4  0  0  0  0
 15 20  4  0  0  0  0
 18 21  1  0  0  0  0
 21 22  1  0  0  0  0
 21 23  1  0  0  0  0
 21 24  1  0  0  0  0
  3 25  1  0  0  0  0
 25 26  2  0  0  0  0
 25 27  1  0  0  0  0
 27 28  1  0  0  0  0
 28 29  4  0  0  0  0
 29 30  4  0  0  0  0
 30 31  4  0  0  0  0
 31 32  4  0  0  0  0
 32 33  4  0  0  0  0
 28 33  4  0  0  0  0
  1 34  1  0  0  0  0
  1 35  1  0  0  0  0
  2 36  1  0  0  0  0
  2 37  1  0  0  0  0
  4 38  1  0  0  0  0
  4 39  1  0  0  0  0
  5 40  1  0  0  0  0
  5 41  1  0  0  0  0
  7 42  1  0  0  0  0
  9 43  1  0  0  0  0
 11 44  1  0  0  0  0
 12 45  1  0  0  0  0
 13 46  1  0  0  0  0
 17 47  1  0  0  0  0
 19 48  1  0  0  0  0
 20 49  1  0  0  0  0
 27 50  1  0  0  0  0
 31 51  1  0  0  0  0
 32 52  1  0  0  0  0
 33 53  1  0  0  0  0
M  END
$$$$
38
  Mrv0541 12152312282D          

 29 30  0  0  0  0            999 V2000
    2.8579   -2.4750    0.0000 C   0  0  0  0  0  0  0  0  0  0  0  0
    3.5724   -2.8875    0.0000 C   0  0  0  0  0  0  0  0  0  0  0  0
    3.5724   -3.7125    0.0000 C   0  0  0  0  0  0  0  0  0  0  0  0
    2.8579   -4.1250    0.0000 C   0  0  0  0  0  0  0  0  0  0  0  0
    2.1434   -3.7125    0.0000 C   0  0  0  0  0  0  0  0  0  0  0  0
    2.1434   -2.8875    0.0000 C   0  0  0  0  0  0  0  0  0  0  0  0
    2.8579   -4.9500    0.0000 N   0  0  0  0  0  0  0  0  0  0  0  0
    2.1434   -5.3625    0.0000 C   0  0  0  0  0  0  0  0  0  0  0  0
    2.1434   -6.1875    0.0000 N   0  0  0  0  0  0  0  0  0  0  0  0
    1.4289   -6.6000    0.0000 C   0  0  0  0  0  0  0  0  0  0  0  0
    1.4289   -7.4250    0.0000 C   0  0  0  0  0  0  0  0  0  0  0  0
    0.7145   -7.8375    0.0000 C   0  0  0  0  0  0  0  0  0  0  0  0
   -0.0000   -7.4250    0.0000 C   0  0  0  0  0  0  0  0  0  0  0  0
   -0.0000   -6.6000    0.0000 C   0  0  0  0  0  0  0  0  0  0  0  0
    0.7145   -6.1875    0.0000 C   0  0  0  0  0  0  0  0  0  0  0  0
    1.4289   -4.9500    0.0000 N   0  0  0  0  0  0  0  0  0  0  0  0
    2.8579   -1.6500    0.0000 H   0  0  0  0  0  0  0  0  0  0  0  0
    4.2868   -2.4750    0.0000 H   0  0  0  0  0  0  0  0  0  0  0  0
    4.2868   -4.1250    0.0000 H   0  0  0  0  0  0  0  0  0  0  0  0
    1.6131   -4.3445    0.0000 H   0  0  0  0  0  0  0  0  0  0  0  0
    1.4289   -2.4750    0.0000 H   0  0  0  0  0  0  0  0  0  0  0  0
    3.5724   -5.3625    0.0000 H   0  0  0  0  0  0  0  0  0  0  0  0
    2.1434   -7.8375    0.0000 H   0  0  0  0  0  0  0  0  0  0  0  0
    0.7145   -8.6625    0.0000 H   0  0  0  0  0  0  0  0  0  0  0  0
   -0.7145   -7.8375    0.0000 H   0  0  0  0  0  0  0  0  0  0  0  0
   -0.7145   -6.1875    0.0000 H   0  0  0  0  0  0  0  0  0  0  0  0
    0.4323   -5.4123    0.0000 H   0  0  0  0  0  0  0  0  0  0  0  0
    1.1468   -4.1748    0.0000 H   0  0  0  0  0  0  0  0  0  0  0  0
    0.8986   -5.5820    0.0000 H   0  0  0  0  0  0  0  0  0  0  0  0
  1  2  4  0  0  0  0
  2  3  4  0  0  0  0
  3  4  4  0  0  0  0
  4  5  4  0  0  0  0
  5  6  4  0  0  0  0
  1  6  4  0  0  0  0
  4  7  1  0  0  0  0
  7  8  1  0  0  0  0
  8  9  2  0  0  0  0
  9 10  1  4  0  0  0
 10 11  4  0  0  0  0
 11 12  4  0  0  0  0
 12 13  4  0  0  0  0
 13 14  4  0  0  0  0
 14 15  4  0  0  0  0
 10 15  4  0  0  0  0
  8 16  1  0  0  0  0
  1 17  1  0  0  0  0
  2 18  1  0  0  0  0
  3 19  1  0  0  0  0
  5 20  1  0  0  0  0
  6 21  1  0  0  0  0
  7 22  1  0  0  0  0
 11 23  1  0  0  0  0
 12 24  1  0  0  0  0
 13 25  1  0  0  0  0
 14 26  1  0  0  0  0
 15 27  1  0  0  0  0
 16 28  1  0  0  0  0
 16 29  1  0  0  0  0
M  END
$$$$
39
  Mrv0541 12152312282D          

 34 35  0  0  0  0            999 V2000
    0.0000   -4.9500    0.0000 C   0  0  0  0  0  0  0  0  0  0  0  0
    0.0000   -4.1250    0.0000 C   0  0  0  0  0  0  0  0  0  0  0  0
    0.7145   -3.7125    0.0000 C   0  0  0  0  0  0  0  0  0  0  0  0
    1.4289   -4.1250    0.0000 C   0  0  0  0  0  0  0  0  0  0  0  0
    1.4289   -4.9500    0.0000 C   0  0  0  0  0  0  0  0  0  0  0  0
    0.7145   -5.3625    0.0000 C   0  0  0  0  0  0  0  0  0  0  0  0
    2.1434   -3.7125    0.0000 C   0  0  0  0  0  0  0  0  0  0  0  0
    2.8579   -4.1250    0.0000 C   0  0  0  0  0  0  0  0  0  0  0  0
    3.5724   -3.7125    0.0000 O   0  0  0  0  0  0  0  0  0  0  0  0
    4.2868   -4.1250    0.0000 C   0  0  0  0  0  0  0  0  0  0  0  0
    4.2868   -4.9500    0.0000 O   0  0  0  0  0  0  0  0  0  0  0  0
    5.0013   -3.7125    0.0000 C   0  0  0  0  0  0  0  0  0  0  0  0
    5.7158   -4.1250    0.0000 C   0  0  0  0  0  0  0  0  0  0  0  0
    6.4302   -3.7125    0.0000 C   0  0  0  0  0  0  0  0  0  0  0  0
    7.1447   -4.1250    0.0000 C   0  0  0  0  0  0  0  0  0  0  0  0
    7.1447   -4.9500    0.0000 C   0  0  0  0  0  0  0  0  0  0  0  0
    6.4302   -5.3625    0.0000 C   0  0  0  0  0  0  0  0  0  0  0  0
    5.7158   -4.9500    0.0000 C   0  0  0  0  0  0  0  0  0  0  0  0
   -0.7145   -5.3625    0.0000 H   0  0  0  0  0  0  0  0  0  0  0  0
   -0.7145   -3.7125    0.0000 H   0  0  0  0  0  0  0  0  0  0  0  0
    0.7145   -2.8875    0.0000 H   0  0  0  0  0  0  0  0  0  0  0  0
    2.1434   -5.3625    0.0000 H   0  0  0  0  0  0  0  0  0  0  0  0
    0.7145   -6.1875    0.0000 H   0  0  0  0  0  0  0  0  0  0  0  0
    1.7561   -2.9841    0.0000 H   0  0  0  0  0  0  0  0  0  0  0  0
    2.5307   -2.9841    0.0000 H   0  0  0  0  0  0  0  0  0  0  0  0
    2.4706   -4.8534    0.0000 H   0  0  0  0  0  0  0  0  0  0  0  0
    3.2452   -4.8534    0.0000 H   0  0  0  0  0  0  0  0  0  0  0  0
    4.6140   -2.9841    0.0000 H   0  0  0  0  0  0  0  0  0  0  0  0
    5.3886   -2.9841    0.0000 H   0  0  0  0  0  0  0  0  0  0  0  0
    6.4302   -2.8875    0.0000 H   0  0  0  0  0  0  0  0  0  0  0  0
    7.8592   -3.7125    0.0000 H   0  0  0  0  0  0  0  0  0  0  0  0
    7.8592   -5.3625    0.0000 H   0  0  0  0  0  0  0  0  0  0  0  0
    6.4302   -6.1875    0.0000 H   0  0  0  0  0  0  0  0  0  0  0  0
    5.0013   -5.3625    0.0000 H   0  0  0  0  0  0  0  0  0  0  0  0
  1  2  4  0  0  0  0
  2  3  4  0  0  0  0
  3  4  4  0  0  0  0
  4  5  4  0  0  0  0
  5  6  4  0  0  0  0
  1  6  4  0  0  0  0
  4  7  1  0  0  0  0
  7  8  1  0  0  0  0
  8  9  1  0  0  0  0
  9 10  1  0  0  0  0
 10 11  2  0  0  0  0
 10 12  1  0  0  0  0
 12 13  1  0  0  0  0
 13 14  4  0  0  0  0
 14 15  4  0  0  0  0
 15 16  4  0  0  0  0
 16 17  4  0  0  0  0
 17 18  4  0  0  0  0
 13 18  4  0  0  0  0
  1 19  1  0  0  0  0
  2 20  1  0  0  0  0
  3 21  1  0  0  0  0
  5 22  1  0  0  0  0
  6 23  1  0  0  0  0
  7 24  1  0  0  0  0
  7 25  1  0  0  0  0
  8 26  1  0  0  0  0
  8 27  1  0  0  0  0
 12 28  1  0  0  0  0
 12 29  1  0  0  0  0
 14 30  1  0  0  0  0
 15 31  1  0  0  0  0
 16 32  1  0  0  0  0
 17 33  1  0  0  0  0
 18 34  1  0  0  0  0
M  END
$$$$
40
  Mrv0541 12152312282D          

 23 23  0  0  0  0            999 V2000
    0.0000    3.3000    0.0000 C   0  0  0  0  0  0  0  0  0  0  0  0
    0.0000    2.4750    0.0000 C   0  0  0  0  0  0  0  0  0  0  0  0
    0.7145    2.0625    0.0000 N   0  0  0  0  0  0  0  0  0  0  0  0
    0.7145    1.2375    0.0000 C   0  0  0  0  0  0  0  0  0  0  0  0
    1.4289    0.8250    0.0000 C   0  0  0  0  0  0  0  0  0  0  0  0
    1.4289   -0.0000    0.0000 C   0  0  0  0  0  0  0  0  0  0  0  0
    0.7145   -0.4125    0.0000 C   0  0  0  0  0  0  0  0  0  0  0  0
    0.0000    0.0000    0.0000 C   0  0  0  0  0  0  0  0  0  0  0  0
    0.0000    0.8250    0.0000 C   0  0  0  0  0  0  0  0  0  0  0  0
   -0.7145   -0.4125    0.0000 C   0  0  0  0  0  0  0  0  0  0  0  0
    0.8250    3.3000    0.0000 H   0  0  0  0  0  0  0  0  0  0  0  0
    0.0000    4.1250    0.0000 H   0  0  0  0  0  0  0  0  0  0  0  0
   -0.8250    3.3000    0.0000 H   0  0  0  0  0  0  0  0  0  0  0  0
   -0.8245    2.4462    0.0000 H   0  0  0  0  0  0  0  0  0  0  0  0
   -0.4372    1.7754    0.0000 H   0  0  0  0  0  0  0  0  0  0  0  0
    1.4289    2.4750    0.0000 H   0  0  0  0  0  0  0  0  0  0  0  0
    2.1434    1.2375    0.0000 H   0  0  0  0  0  0  0  0  0  0  0  0
    2.1434   -0.4125    0.0000 H   0  0  0  0  0  0  0  0  0  0  0  0
    0.7145   -1.2375    0.0000 H   0  0  0  0  0  0  0  0  0  0  0  0
   -0.7145    1.2375    0.0000 H   0  0  0  0  0  0  0  0  0  0  0  0
   -1.1270    0.3020    0.0000 H   0  0  0  0  0  0  0  0  0  0  0  0
   -1.4289   -0.8250    0.0000 H   0  0  0  0  0  0  0  0  0  0  0  0
   -0.3020   -1.1270    0.0000 H   0  0  0  0  0  0  0  0  0  0  0  0
  1  2  1  0  0  0  0
  2  3  1  0  0  0  0
  3  4  1  0  0  0  0
  4  5  4  0  0  0  0
  5  6  4  0  0  0  0
  6  7  4  0  0  0  0
  7  8  4  0  0  0  0
  8  9  4  0  0  0  0
  4  9  4  0  0  0  0
  8 10  1  0  0  0  0
  1 11  1  0  0  0  0
  1 12  1  0  0  0  0
  1 13  1  0  0  0  0
  2 14  1  0  0  0  0
  2 15  1  0  0  0  0
  3 16  1  0  0  0  0
  5 17  1  0  0  0  0
  6 18  1  0  0  0  0
  7 19  1  0  0  0  0
  9 20  1  0  0  0  0
 10 21  1  0  0  0  0
 10 22  1  0  0  0  0
 10 23  1  0  0  0  0
M  END
$$$$
41
  Mrv0541 12152312282D          

 61 63  0  0  0  0            999 V2000
   -5.7158   -2.4750    0.0000 C   0  0  0  0  0  0  0  0  0  0  0  0
   -5.7158   -3.3000    0.0000 O   0  0  0  0  0  0  0  0  0  0  0  0
   -6.4302   -3.7125    0.0000 C   0  0  0  0  0  0  0  0  0  0  0  0
   -6.4302   -4.5375    0.0000 C   0  0  0  0  0  0  0  0  0  0  0  0
   -7.1447   -4.9500    0.0000 C   0  0  0  0  0  0  0  0  0  0  0  0
   -7.8592   -4.5375    0.0000 C   0  0  0  0  0  0  0  0  0  0  0  0
   -7.8592   -3.7125    0.0000 C   0  0  0  0  0  0  0  0  0  0  0  0
   -7.1447   -3.3000    0.0000 C   0  0  0  0  0  0  0  0  0  0  0  0
   -8.5737   -4.9500    0.0000 Cl  0  0  0  0  0  0  0  0  0  0  0  0
   -5.7158   -4.9500    0.0000 C   0  0  0  0  0  0  0  0  0  0  0  0
   -5.7158   -5.7750    0.0000 O   0  0  0  0  0  0  0  0  0  0  0  0
   -5.0013   -4.5375    0.0000 N   0  0  0  0  0  0  0  0  0  0  0  0
   -4.2868   -4.9500    0.0000 C   0  0  0  0  0  0  0  0  0  0  0  0
   -3.5724   -4.5375    0.0000 C   0  0  0  0  0  0  0  0  0  0  0  0
   -2.8579   -4.9500    0.0000 C   0  0  0  0  0  0  0  0  0  0  0  0
   -2.1434   -4.5375    0.0000 C   0  0  0  0  0  0  0  0  0  0  0  0
   -1.4289   -4.9500    0.0000 C   0  0  0  0  0  0  0  0  0  0  0  0
   -1.4289   -5.7750    0.0000 C   0  0  0  0  0  0  0  0  0  0  0  0
   -2.1434   -6.1875    0.0000 C   0  0  0  0  0  0  0  0  0  0  0  0
   -2.8579   -5.7750    0.0000 C   0  0  0  0  0  0  0  0  0  0  0  0
   -0.7145   -6.1875    0.0000 S   0  0  0  0  0  0  0  0  0  0  0  0
   -1.1270   -6.9020    0.0000 O   0  0  0  0  0  0  0  0  0  0  0  0
   -0.3020   -5.4730    0.0000 O   0  0  0  0  0  0  0  0  0  0  0  0
    0.0000   -6.6000    0.0000 N   0  0  0  0  0  0  0  0  0  0  0  0
    0.0000   -7.4250    0.0000 C   0  0  0  0  0  0  0  0  0  0  0  0
   -0.7145   -7.8375    0.0000 O   0  0  0  0  0  0  0  0  0  0  0  0
    0.7145   -7.8375    0.0000 N   0  0  0  0  0  0  0  0  0  0  0  0
    1.4289   -7.4250    0.0000 C   0  0  0  0  0  0  0  0  0  0  0  0
    1.4289   -6.6000    0.0000 C   0  0  0  0  0  0  0  0  0  0  0  0
    2.1434   -6.1875    0.0000 C   0  0  0  0  0  0  0  0  0  0  0  0
    2.8579   -6.6000    0.0000 C   0  0  0  0  0  0  0  0  0  0  0  0
    2.8579   -7.4250    0.0000 C   0  0  0  0  0  0  0  0  0  0  0  0
    2.1434   -7.8375    0.0000 C   0  0  0  0  0  0  0  0  0  0  0  0
   -4.8908   -2.4750    0.0000 H   0  0  0  0  0  0  0  0  0  0  0  0
   -5.7158   -1.6500    0.0000 H   0  0  0  0  0  0  0  0  0  0  0  0
   -6.5408   -2.4750    0.0000 H   0  0  0  0  0  0  0  0  0  0  0  0
   -7.1447   -5.7750    0.0000 H   0  0  0  0  0  0  0  0  0  0  0  0
   -8.5737   -3.3000    0.0000 H   0  0  0  0  0  0  0  0  0  0  0  0
   -7.1447   -2.4750    0.0000 H   0  0  0  0  0  0  0  0  0  0  0  0
   -5.0013   -3.7125    0.0000 H   0  0  0  0  0  0  0  0  0  0  0  0
   -4.6741   -5.6784    0.0000 H   0  0  0  0  0  0  0  0  0  0  0  0
   -3.8995   -5.6784    0.0000 H   0  0  0  0  0  0  0  0  0  0  0  0
   -3.9597   -3.8091    0.0000 H   0  0  0  0  0  0  0  0  0  0  0  0
   -3.1850   -3.8091    0.0000 H   0  0  0  0  0  0  0  0  0  0  0  0
   -2.1434   -3.7125    0.0000 H   0  0  0  0  0  0  0  0  0  0  0  0
   -0.7145   -4.5375    0.0000 H   0  0  0  0  0  0  0  0  0  0  0  0
   -2.1434   -7.0125    0.0000 H   0  0  0  0  0  0  0  0  0  0  0  0
   -3.5724   -6.1875    0.0000 H   0  0  0  0  0  0  0  0  0  0  0  0
    0.7145   -6.1875    0.0000 H   0  0  0  0  0  0  0  0  0  0  0  0
    0.7145   -8.6625    0.0000 H   0  0  0  0  0  0  0  0  0  0  0  0
    0.7145   -7.0125    0.0000 H   0  0  0  0  0  0  0  0  0  0  0  0
    0.6044   -6.5712    0.0000 H   0  0  0  0  0  0  0  0  0  0  0  0
    0.9918   -5.9004    0.0000 H   0  0  0  0  0  0  0  0  0  0  0  0
    1.7561   -5.4591    0.0000 H   0  0  0  0  0  0  0  0  0  0  0  0
    2.5307   -5.4591    0.0000 H   0  0  0  0  0  0  0  0  0  0  0  0
    3.2951   -5.9004    0.0000 H   0  0  0  0  0  0  0  0  0  0  0  0
    3.6824   -6.5712    0.0000 H   0  0  0  0  0  0  0  0  0  0  0  0
    3.6824   -7.4538    0.0000 H   0  0  0  0  0  0  0  0  0  0  0  0
    3.2951   -8.1246    0.0000 H   0  0  0  0  0  0  0  0  0  0  0  0
    2.5307   -8.5659    0.0000 H   0  0  0  0  0  0  0  0  0  0  0  0
    1.7561   -8.5659    0.0000 H   0  0  0  0  0  0  0  0  0  0  0  0
  1  2  1  0  0  0  0
  2  3  1  0  0  0  0
  3  4  4  0  0  0  0
  4  5  4  0  0  0  0
  5  6  4  0  0  0  0
  6  7  4  0  0  0  0
  7  8  4  0  0  0  0
  3  8  4  0  0  0  0
  6  9  1  0  0  0  0
  4 10  1  0  0  0  0
 10 11  2  0  0  0  0
 10 12  1  0  0  0  0
 12 13  1  0  0  0  0
 13 14  1  0  0  0  0
 14 15  1  0  0  0  0
 15 16  4  0  0  0  0
 16 17  4  0  0  0  0
 17 18  4  0  0  0  0
 18 19  4  0  0  0  0
 19 20  4  0  0  0  0
 15 20  4  0  0  0  0
 18 21  1  0  0  0  0
 21 22  2  0  0  0  0
 21 23  2  0  0  0  0
 21 24  1  0  0  0  0
 24 25  1  0  0  0  0
 25 26  2  0  0  0  0
 25 27  1  0  0  0  0
 27 28  1  0  0  0  0
 28 29  1  0  0  0  0
 29 30  1  0  0  0  0
 30 31  1  0  0  0  0
 31 32  1  0  0  0  0
 32 33  1  0  0  0  0
 28 33  1  0  0  0  0
  1 34  1  0  0  0  0
  1 35  1  0  0  0  0
  1 36  1  0  0  0  0
  5 37  1  0  0  0  0
  7 38  1  0  0  0  0
  8 39  1  0  0  0  0
 12 40  1  0  0  0  0
 13 41  1  0  0  0  0
 13 42  1  0  0  0  0
 14 43  1  0  0  0  0
 14 44  1  0  0  0  0
 16 45  1  0  0  0  0
 17 46  1  0  0  0  0
 19 47  1  0  0  0  0
 20 48  1  0  0  0  0
 24 49  1  0  0  0  0
 27 50  1  0  0  0  0
 28 51  1  0  0  0  0
 29 52  1  0  0  0  0
 29 53  1  0  0  0  0
 30 54  1  0  0  0  0
 30 55  1  0  0  0  0
 31 56  1  0  0  0  0
 31 57  1  0  0  0  0
 32 58  1  0  0  0  0
 32 59  1  0  0  0  0
 33 60  1  0  0  0  0
 33 61  1  0  0  0  0
M  END
$$$$
42
  Mrv0541 12152312282D          

 23 26  0  0  1  0            999 V2000
    0.1351   -2.0602    0.0000 C   0  0  2  0  0  0  0  0  0  0  0  0
    0.5344   -1.3383    0.0000 C   0  0  1  0  0  0  0  0  0  0  0  0
   -0.0288   -0.7354    0.0000 C   0  0  2  0  0  0  0  0  0  0  0  0
   -0.7762   -1.0848    0.0000 C   0  0  2  0  0  0  0  0  0  0  0  0
   -0.6749   -1.9036    0.0000 C   0  0  1  0  0  0  0  0  0  0  0  0
   -1.4346   -1.5819    0.0000 O   0  0  0  0  0  0  0  0  0  0  0  0
    0.1278    0.0746    0.0000 Cl  0  0  0  0  0  0  0  0  0  0  0  0
    1.1407   -0.9495    0.0000 C   0  0  1  0  0  0  0  0  0  0  0  0
    1.9362   -1.4148    0.0000 C   0  0  0  0  0  0  0  0  0  0  0  0
    1.6411   -2.0402    0.0000 C   0  0  0  0  0  0  0  0  0  0  0  0
    0.9106   -1.6699    0.0000 C   0  0  2  0  0  0  0  0  0  0  0  0
    0.9807   -0.1341    0.0000 C   0  0  0  0  0  0  0  0  0  0  0  0
    0.4010    0.4529    0.0000 Cl  0  0  0  0  0  0  0  0  0  0  0  0
    1.4674    0.5320    0.0000 Cl  0  0  0  0  0  0  0  0  0  0  0  0
    0.9094   -2.4949    0.0000 Cl  0  0  0  0  0  0  0  0  0  0  0  0
    1.9087   -2.8206    0.0000 Cl  0  0  0  0  0  0  0  0  0  0  0  0
    2.7243   -1.1707    0.0000 Cl  0  0  0  0  0  0  0  0  0  0  0  0
    1.3795   -0.1598    0.0000 Cl  0  0  0  0  0  0  0  0  0  0  0  0
    0.2483   -2.8774    0.0000 H   0  0  0  0  0  0  0  0  0  0  0  0
    0.3507   -0.5340    0.0000 H   0  0  0  0  0  0  0  0  0  0  0  0
    0.6381   -0.2499    0.0000 H   0  0  0  0  0  0  0  0  0  0  0  0
   -1.2018   -0.3780    0.0000 H   0  0  0  0  0  0  0  0  0  0  0  0
   -0.9153   -2.6927    0.0000 H   0  0  0  0  0  0  0  0  0  0  0  0
  1  2  1  0  0  0  0
  2  3  1  0  0  0  0
  3  4  1  0  0  0  0
  4  5  1  0  0  0  0
  1  5  1  0  0  0  0
  5  6  1  0  0  0  0
  4  6  1  0  0  0  0
  3  7  1  6  0  0  0
  2  8  1  0  0  0  0
  8  9  1  0  0  0  0
  9 10  2  0  0  0  0
 10 11  1  0  0  0  0
  1 11  1  0  0  0  0
 11 12  1  0  0  0  0
  8 12  1  0  0  0  0
 12 13  1  0  0  0  0
 12 14  1  0  0  0  0
 11 15  1  6  0  0  0
 10 16  1  0  0  0  0
  9 17  1  0  0  0  0
  8 18  1  1  0  0  0
  1 19  1  6  0  0  0
  2 20  1  6  0  0  0
  3 21  1  1  0  0  0
  4 22  1  1  0  0  0
  5 23  1  1  0  0  0
M  END
$$$$
43
  Mrv0541 12152312282D          

 52 51  0  0  0  0            999 V2000
    5.0627    1.0005    0.0000 C   0  0  0  0  0  0  0  0  0  0  0  0
    5.8729    1.1565    0.0000 C   0  0  0  0  0  0  0  0  0  0  0  0
    6.4129    0.5328    0.0000 C   0  0  0  0  0  0  0  0  0  0  0  0
    6.1429   -0.2467    0.0000 N   0  0  0  0  0  0  0  0  0  0  0  0
    5.3328   -0.4027    0.0000 C   0  0  0  0  0  0  0  0  0  0  0  0
    5.0627   -1.1822    0.0000 C   0  0  0  0  0  0  0  0  0  0  0  0
    4.2526   -1.3381    0.0000 N   0  0  0  0  0  0  0  0  0  0  0  0
    3.9825   -2.1177    0.0000 C   0  0  0  0  0  0  0  0  0  0  0  0
    4.5226   -2.7413    0.0000 C   0  0  0  0  0  0  0  0  0  0  0  0
    5.3328   -2.5854    0.0000 C   0  0  0  0  0  0  0  0  0  0  0  0
    4.2526   -3.5209    0.0000 O   0  0  0  0  0  0  0  0  0  0  0  0
    3.7125   -0.7145    0.0000 C   0  0  0  0  0  0  0  0  0  0  0  0
    2.9024   -0.8704    0.0000 C   0  0  0  0  0  0  0  0  0  0  0  0
    2.3623   -0.2467    0.0000 C   0  0  0  0  0  0  0  0  0  0  0  0
    2.6323   -1.6499    0.0000 O   0  0  0  0  0  0  0  0  0  0  0  0
    6.6830   -0.8704    0.0000 C   0  0  0  0  0  0  0  0  0  0  0  0
    7.4931   -0.7145    0.0000 C   0  0  0  0  0  0  0  0  0  0  0  0
    7.7632    0.0651    0.0000 C   0  0  0  0  0  0  0  0  0  0  0  0
    8.0332   -1.3381    0.0000 O   0  0  0  0  0  0  0  0  0  0  0  0
    6.1429    1.9360    0.0000 O   0  0  0  0  0  0  0  0  0  0  0  0
    4.9068    1.8107    0.0000 H   0  0  0  0  0  0  0  0  0  0  0  0
    4.2526    0.8446    0.0000 H   0  0  0  0  0  0  0  0  0  0  0  0
    5.2186    0.1904    0.0000 H   0  0  0  0  0  0  0  0  0  0  0  0
    5.8857    0.3316    0.0000 H   0  0  0  0  0  0  0  0  0  0  0  0
    7.0551    1.0508    0.0000 H   0  0  0  0  0  0  0  0  0  0  0  0
    7.2369    0.5745    0.0000 H   0  0  0  0  0  0  0  0  0  0  0  0
    4.8847    0.2901    0.0000 H   0  0  0  0  0  0  0  0  0  0  0  0
    4.5079   -0.3867    0.0000 H   0  0  0  0  0  0  0  0  0  0  0  0
    5.8876   -1.1981    0.0000 H   0  0  0  0  0  0  0  0  0  0  0  0
    5.5108   -1.8749    0.0000 H   0  0  0  0  0  0  0  0  0  0  0  0
    3.1940   -1.8750    0.0000 H   0  0  0  0  0  0  0  0  0  0  0  0
    3.3404   -2.6357    0.0000 H   0  0  0  0  0  0  0  0  0  0  0  0
    4.2284   -1.9706    0.0000 H   0  0  0  0  0  0  0  0  0  0  0  0
    5.4887   -3.3955    0.0000 H   0  0  0  0  0  0  0  0  0  0  0  0
    6.1429   -2.4295    0.0000 H   0  0  0  0  0  0  0  0  0  0  0  0
    4.6926   -2.0650    0.0000 H   0  0  0  0  0  0  0  0  0  0  0  0
    3.4425   -3.6768    0.0000 H   0  0  0  0  0  0  0  0  0  0  0  0
    4.0884    0.0199    0.0000 H   0  0  0  0  0  0  0  0  0  0  0  0
    3.5850    0.1006    0.0000 H   0  0  0  0  0  0  0  0  0  0  0  0
    3.1724   -0.0908    0.0000 H   0  0  0  0  0  0  0  0  0  0  0  0
    2.9859    0.2933    0.0000 H   0  0  0  0  0  0  0  0  0  0  0  0
    1.8222    0.3769    0.0000 H   0  0  0  0  0  0  0  0  0  0  0  0
    1.7386   -0.7868    0.0000 H   0  0  0  0  0  0  0  0  0  0  0  0
    1.8222   -1.8058    0.0000 H   0  0  0  0  0  0  0  0  0  0  0  0
    6.3071   -1.6048    0.0000 H   0  0  0  0  0  0  0  0  0  0  0  0
    6.8105   -1.6855    0.0000 H   0  0  0  0  0  0  0  0  0  0  0  0
    6.6785   -0.5839    0.0000 H   0  0  0  0  0  0  0  0  0  0  0  0
    8.5427   -0.2050    0.0000 H   0  0  0  0  0  0  0  0  0  0  0  0
    8.0332    0.8446    0.0000 H   0  0  0  0  0  0  0  0  0  0  0  0
    6.9924   -0.2291    0.0000 H   0  0  0  0  0  0  0  0  0  0  0  0
    7.7632   -2.1177    0.0000 H   0  0  0  0  0  0  0  0  0  0  0  0
    6.9530    2.0919    0.0000 H   0  0  0  0  0  0  0  0  0  0  0  0
  1  2  1  0  0  0  0
  2  3  1  0  0  0  0
  3  4  1  0  0  0  0
  4  5  1  0  0  0  0
  5  6  1  0  0  0  0
  6  7  1  0  0  0  0
  7  8  1  0  0  0  0
  8  9  1  0  0  0  0
  9 10  1  0  0  0  0
  9 11  1  0  0  0  0
  7 12  1  0  0  0  0
 12 13  1  0  0  0  0
 13 14  1  0  0  0  0
 13 15  1  0  0  0  0
  4 16  1  0  0  0  0
 16 17  1  0  0  0  0
 17 18  1  0  0  0  0
 17 19  1  0  0  0  0
  2 20  1  0  0  0  0
  1 21  1  0  0  0  0
  1 22  1  0  0  0  0
  1 23  1  0  0  0  0
  2 24  1  0  0  0  0
  3 25  1  0  0  0  0
  3 26  1  0  0  0  0
  5 27  1  0  0  0  0
  5 28  1  0  0  0  0
  6 29  1  0  0  0  0
  6 30  1  0  0  0  0
  8 31  1  0  0  0  0
  8 32  1  0  0  0  0
  9 33  1  0  0  0  0
 10 34  1  0  0  0  0
 10 35  1  0  0  0  0
 10 36  1  0  0  0  0
 11 37  1  0  0  0  0
 12 38  1  0  0  0  0
 12 39  1  0  0  0  0
 13 40  1  0  0  0  0
 14 41  1  0  0  0  0
 14 42  1  0  0  0  0
 14 43  1  0  0  0  0
 15 44  1  0  0  0  0
 16 45  1  0  0  0  0
 16 46  1  0  0  0  0
 17 47  1  0  0  0  0
 18 48  1  0  0  0  0
 18 49  1  0  0  0  0
 18 50  1  0  0  0  0
 19 51  1  0  0  0  0
 20 52  1  0  0  0  0
M  END
$$$$
44
  Mrv0541 12152312282D          

 44 47  0  0  0  0            999 V2000
    2.4781   -5.0656    0.0000 C   0  0  0  0  0  0  0  0  0  0  0  0
    2.4822   -4.2406    0.0000 N   0  0  0  0  0  0  0  0  0  0  0  0
    1.7698   -3.8246    0.0000 C   0  0  0  0  0  0  0  0  0  0  0  0
    1.7739   -2.9996    0.0000 C   0  0  0  0  0  0  0  0  0  0  0  0
    1.0614   -2.5836    0.0000 C   0  0  0  0  0  0  0  0  0  0  0  0
    1.0655   -1.7586    0.0000 C   0  0  0  0  0  0  0  0  0  0  0  0
    1.2052   -0.7200    0.0000 C   0  0  0  0  0  0  0  0  0  0  0  0
    0.9605   -0.1141    0.0000 C   0  0  0  0  0  0  0  0  0  0  0  0
    0.9228   -1.0102    0.0000 C   0  0  0  0  0  0  0  0  0  0  0  0
    1.6614   -1.3425    0.0000 C   0  0  0  0  0  0  0  0  0  0  0  0
    2.2811   -0.7979    0.0000 C   0  0  0  0  0  0  0  0  0  0  0  0
    3.0626   -1.0623    0.0000 C   0  0  0  0  0  0  0  0  0  0  0  0
    3.2244   -1.8712    0.0000 C   0  0  0  0  0  0  0  0  0  0  0  0
    2.6047   -2.4158    0.0000 C   0  0  0  0  0  0  0  0  0  0  0  0
    1.8232   -2.1515    0.0000 C   0  0  0  0  0  0  0  0  0  0  0  0
    0.1190   -1.3621    0.0000 C   0  0  0  0  0  0  0  0  0  0  0  0
   -0.6463   -1.0541    0.0000 C   0  0  0  0  0  0  0  0  0  0  0  0
   -1.2958   -1.5629    0.0000 C   0  0  0  0  0  0  0  0  0  0  0  0
   -1.1799   -2.3797    0.0000 C   0  0  0  0  0  0  0  0  0  0  0  0
   -0.4145   -2.6877    0.0000 C   0  0  0  0  0  0  0  0  0  0  0  0
    0.2349   -2.1789    0.0000 C   0  0  0  0  0  0  0  0  0  0  0  0
    1.6531   -5.0615    0.0000 H   0  0  0  0  0  0  0  0  0  0  0  0
    2.4741   -5.8906    0.0000 H   0  0  0  0  0  0  0  0  0  0  0  0
    3.3031   -5.0697    0.0000 H   0  0  0  0  0  0  0  0  0  0  0  0
    3.1987   -3.8317    0.0000 H   0  0  0  0  0  0  0  0  0  0  0  0
    1.3291   -4.5221    0.0000 H   0  0  0  0  0  0  0  0  0  0  0  0
    0.9451   -3.8493    0.0000 H   0  0  0  0  0  0  0  0  0  0  0  0
    2.5985   -2.9749    0.0000 H   0  0  0  0  0  0  0  0  0  0  0  0
    2.2145   -2.3021    0.0000 H   0  0  0  0  0  0  0  0  0  0  0  0
    0.6208   -3.2811    0.0000 H   0  0  0  0  0  0  0  0  0  0  0  0
    0.2368   -2.6083    0.0000 H   0  0  0  0  0  0  0  0  0  0  0  0
    1.9929   -0.9653    0.0000 H   0  0  0  0  0  0  0  0  0  0  0  0
    1.9077   -0.2874    0.0000 H   0  0  0  0  0  0  0  0  0  0  0  0
    1.3650    0.6049    0.0000 H   0  0  0  0  0  0  0  0  0  0  0  0
    0.3384    0.4278    0.0000 H   0  0  0  0  0  0  0  0  0  0  0  0
    0.6367   -1.7840    0.0000 H   0  0  0  0  0  0  0  0  0  0  0  0
    2.1193    0.0111    0.0000 H   0  0  0  0  0  0  0  0  0  0  0  0
    3.6823   -0.5177    0.0000 H   0  0  0  0  0  0  0  0  0  0  0  0
    4.0059   -2.1356    0.0000 H   0  0  0  0  0  0  0  0  0  0  0  0
    2.7665   -3.2248    0.0000 H   0  0  0  0  0  0  0  0  0  0  0  0
   -0.7623   -0.2373    0.0000 H   0  0  0  0  0  0  0  0  0  0  0  0
   -2.0611   -1.2548    0.0000 H   0  0  0  0  0  0  0  0  0  0  0  0
   -1.8293   -2.8885    0.0000 H   0  0  0  0  0  0  0  0  0  0  0  0
   -0.2986   -3.5045    0.0000 H   0  0  0  0  0  0  0  0  0  0  0  0
  1  2  1  0  0  0  0
  2  3  1  0  0  0  0
  3  4  1  0  0  0  0
  4  5  1  0  0  0  0
  5  6  1  0  0  0  0
  6  7  1  0  0  0  0
  7  8  1  0  0  0  0
  8  9  1  0  0  0  0
  9 10  1  0  0  0  0
 10 11  4  0  0  0  0
 11 12  4  0  0  0  0
 12 13  4  0  0  0  0
 13 14  4  0  0  0  0
 14 15  4  0  0  0  0
 10 15  4  0  0  0  0
  6 15  1  0  0  0  0
  9 16  1  0  0  0  0
 16 17  4  0  0  0  0
 17 18  4  0  0  0  0
 18 19  4  0  0  0  0
 19 20  4  0  0  0  0
 20 21  4  0  0  0  0
  6 21  1  0  0  0  0
 16 21  4  0  0  0  0
  1 22  1  0  0  0  0
  1 23  1  0  0  0  0
  1 24  1  0  0  0  0
  2 25  1  0  0  0  0
  3 26  1  0  0  0  0
  3 27  1  0  0  0  0
  4 28  1  0  0  0  0
  4 29  1  0  0  0  0
  5 30  1  0  0  0  0
  5 31  1  0  0  0  0
  7 32  1  0  0  0  0
  7 33  1  0  0  0  0
  8 34  1  0  0  0  0
  8 35  1  0  0  0  0
  9 36  1  0  0  0  0
 11 37  1  0  0  0  0
 12 38  1  0  0  0  0
 13 39  1  0  0  0  0
 14 40  1  0  0  0  0
 17 41  1  0  0  0  0
 18 42  1  0  0  0  0
 19 43  1  0  0  0  0
 20 44  1  0  0  0  0
M  END
$$$$
45
  Mrv0541 12152312282D          

 15 14  0  0  0  0            999 V2000
    2.4750   -1.4289    0.0000 C   0  0  0  0  0  0  0  0  0  0  0  0
    1.6500   -1.4289    0.0000 O   0  0  0  0  0  0  0  0  0  0  0  0
    1.2375   -0.7145    0.0000 P   0  0  0  0  0  0  0  0  0  0  0  0
    1.9520   -0.3020    0.0000 O   0  0  0  0  0  0  0  0  0  0  0  0
    0.5230   -1.1270    0.0000 N   0  0  0  0  0  0  0  0  0  0  0  0
    0.8250    0.0000    0.0000 S   0  0  0  0  0  0  0  0  0  0  0  0
    0.0000    0.0000    0.0000 C   0  0  0  0  0  0  0  0  0  0  0  0
    2.4750   -2.2539    0.0000 H   0  0  0  0  0  0  0  0  0  0  0  0
    3.3000   -1.4289    0.0000 H   0  0  0  0  0  0  0  0  0  0  0  0
    2.4750   -0.6039    0.0000 H   0  0  0  0  0  0  0  0  0  0  0  0
   -0.2894   -0.9837    0.0000 H   0  0  0  0  0  0  0  0  0  0  0  0
    0.5230   -1.9520    0.0000 H   0  0  0  0  0  0  0  0  0  0  0  0
    0.0000    0.8250    0.0000 H   0  0  0  0  0  0  0  0  0  0  0  0
   -0.8250    0.0000    0.0000 H   0  0  0  0  0  0  0  0  0  0  0  0
    0.2822   -0.7752    0.0000 H   0  0  0  0  0  0  0  0  0  0  0  0
  1  2  1  0  0  0  0
  2  3  1  0  0  0  0
  3  4  2  0  0  0  0
  3  5  1  0  0  0  0
  3  6  1  0  0  0  0
  6  7  1  0  0  0  0
  1  8  1  0  0  0  0
  1  9  1  0  0  0  0
  1 10  1  0  0  0  0
  5 11  1  0  0  0  0
  5 12  1  0  0  0  0
  7 13  1  0  0  0  0
  7 14  1  0  0  0  0
  7 15  1  0  0  0  0
M  END
$$$$
46
  Mrv0541 12152312282D          

 29 28  0  0  0  0            999 V2000
    2.9980    2.5559    0.0000 C   0  0  0  0  0  0  0  0  0  0  0  0
    3.7125    2.1434    0.0000 C   0  0  0  0  0  0  0  0  0  0  0  0
    3.7125    1.3184    0.0000 O   0  0  0  0  0  0  0  0  0  0  0  0
    4.4270    2.5559    0.0000 O   0  0  0  0  0  0  0  0  0  0  0  0
    5.1414    2.1434    0.0000 C   0  0  0  0  0  0  0  0  0  0  0  0
    5.8559    2.5559    0.0000 C   0  0  0  0  0  0  0  0  0  0  0  0
    6.5704    2.1434    0.0000 C   0  0  0  0  0  0  0  0  0  0  0  0
    7.2849    2.5559    0.0000 O   0  0  0  0  0  0  0  0  0  0  0  0
    7.9993    2.1434    0.0000 C   0  0  0  0  0  0  0  0  0  0  0  0
    8.7138    2.5559    0.0000 O   0  0  0  0  0  0  0  0  0  0  0  0
    7.9993    1.3184    0.0000 C   0  0  0  0  0  0  0  0  0  0  0  0
    5.8559    3.3809    0.0000 O   0  0  0  0  0  0  0  0  0  0  0  0
    5.1414    3.7934    0.0000 C   0  0  0  0  0  0  0  0  0  0  0  0
    4.4270    3.3809    0.0000 O   0  0  0  0  0  0  0  0  0  0  0  0
    5.1414    4.6184    0.0000 C   0  0  0  0  0  0  0  0  0  0  0  0
    3.4105    3.2704    0.0000 H   0  0  0  0  0  0  0  0  0  0  0  0
    2.2836    2.9684    0.0000 H   0  0  0  0  0  0  0  0  0  0  0  0
    2.5855    1.8414    0.0000 H   0  0  0  0  0  0  0  0  0  0  0  0
    4.7541    1.4150    0.0000 H   0  0  0  0  0  0  0  0  0  0  0  0
    5.5288    1.4150    0.0000 H   0  0  0  0  0  0  0  0  0  0  0  0
    5.8559    1.7309    0.0000 H   0  0  0  0  0  0  0  0  0  0  0  0
    6.1831    1.4150    0.0000 H   0  0  0  0  0  0  0  0  0  0  0  0
    7.1835    1.5914    0.0000 H   0  0  0  0  0  0  0  0  0  0  0  0
    7.2241    1.0362    0.0000 H   0  0  0  0  0  0  0  0  0  0  0  0
    7.9993    0.4934    0.0000 H   0  0  0  0  0  0  0  0  0  0  0  0
    8.8243    1.3184    0.0000 H   0  0  0  0  0  0  0  0  0  0  0  0
    5.9664    4.6184    0.0000 H   0  0  0  0  0  0  0  0  0  0  0  0
    5.1414    5.4434    0.0000 H   0  0  0  0  0  0  0  0  0  0  0  0
    4.3164    4.6184    0.0000 H   0  0  0  0  0  0  0  0  0  0  0  0
  1  2  1  0  0  0  0
  2  3  2  0  0  0  0
  2  4  1  0  0  0  0
  4  5  1  0  0  0  0
  5  6  1  0  0  0  0
  6  7  1  0  0  0  0
  7  8  1  0  0  0  0
  8  9  1  0  0  0  0
  9 10  2  0  0  0  0
  9 11  1  0  0  0  0
  6 12  1  0  0  0  0
 12 13  1  0  0  0  0
 13 14  2  0  0  0  0
 13 15  1  0  0  0  0
  1 16  1  0  0  0  0
  1 17  1  0  0  0  0
  1 18  1  0  0  0  0
  5 19  1  0  0  0  0
  5 20  1  0  0  0  0
  6 21  1  0  0  0  0
  7 22  1  0  0  0  0
  7 23  1  0  0  0  0
 11 24  1  0  0  0  0
 11 25  1  0  0  0  0
 11 26  1  0  0  0  0
 15 27  1  0  0  0  0
 15 28  1  0  0  0  0
 15 29  1  0  0  0  0
M  END
$$$$
47
  Mrv0541 12152312282D          

 30 29  0  0  0  0            999 V2000
    1.2375   -0.7145    0.0000 C   0  0  0  0  0  0  0  0  0  0  0  0
    1.6500   -0.0000    0.0000 C   0  0  0  0  0  0  0  0  0  0  0  0
    2.4750   -0.0000    0.0000 C   0  0  0  0  0  0  0  0  0  0  0  0
    2.8875    0.7145    0.0000 C   0  0  0  0  0  0  0  0  0  0  0  0
    3.7125    0.7145    0.0000 N   0  0  0  0  0  0  0  0  0  0  0  0
    4.1250    1.4289    0.0000 C   0  0  0  0  0  0  0  0  0  0  0  0
    4.9500    1.4289    0.0000 C   0  0  0  0  0  0  0  0  0  0  0  0
    5.3625    2.1434    0.0000 O   0  0  0  0  0  0  0  0  0  0  0  0
    4.1250   -0.0000    0.0000 C   0  0  0  0  0  0  0  0  0  0  0  0
    4.9500    0.0000    0.0000 C   0  0  0  0  0  0  0  0  0  0  0  0
    5.3625   -0.7145    0.0000 O   0  0  0  0  0  0  0  0  0  0  0  0
    0.5230   -0.3020    0.0000 H   0  0  0  0  0  0  0  0  0  0  0  0
    0.8250   -1.4289    0.0000 H   0  0  0  0  0  0  0  0  0  0  0  0
    1.9520   -1.1270    0.0000 H   0  0  0  0  0  0  0  0  0  0  0  0
    0.9504    0.4372    0.0000 H   0  0  0  0  0  0  0  0  0  0  0  0
    1.6212    0.8245    0.0000 H   0  0  0  0  0  0  0  0  0  0  0  0
    2.5038   -0.8245    0.0000 H   0  0  0  0  0  0  0  0  0  0  0  0
    3.2820   -0.1715    0.0000 H   0  0  0  0  0  0  0  0  0  0  0  0
    2.1879    1.1517    0.0000 H   0  0  0  0  0  0  0  0  0  0  0  0
    2.8587    1.5390    0.0000 H   0  0  0  0  0  0  0  0  0  0  0  0
    3.4254    1.8661    0.0000 H   0  0  0  0  0  0  0  0  0  0  0  0
    4.0962    2.2534    0.0000 H   0  0  0  0  0  0  0  0  0  0  0  0
    5.2591    0.6640    0.0000 H   0  0  0  0  0  0  0  0  0  0  0  0
    5.6496    0.9918    0.0000 H   0  0  0  0  0  0  0  0  0  0  0  0
    6.1875    2.1434    0.0000 H   0  0  0  0  0  0  0  0  0  0  0  0
    3.6171   -0.6501    0.0000 H   0  0  0  0  0  0  0  0  0  0  0  0
    4.0962   -0.8245    0.0000 H   0  0  0  0  0  0  0  0  0  0  0  0
    4.9788    0.8245    0.0000 H   0  0  0  0  0  0  0  0  0  0  0  0
    5.6496    0.4372    0.0000 H   0  0  0  0  0  0  0  0  0  0  0  0
    4.9500   -1.4289    0.0000 H   0  0  0  0  0  0  0  0  0  0  0  0
  1  2  1  0  0  0  0
  2  3  1  0  0  0  0
  3  4  1  0  0  0  0
  4  5  1  0  0  0  0
  5  6  1  0  0  0  0
  6  7  1  0  0  0  0
  7  8  1  0  0  0  0
  5  9  1  0  0  0  0
  9 10  1  0  0  0  0
 10 11  1  0  0  0  0
  1 12  1  0  0  0  0
  1 13  1  0  0  0  0
  1 14  1  0  0  0  0
  2 15  1  0  0  0  0
  2 16  1  0  0  0  0
  3 17  1  0  0  0  0
  3 18  1  0  0  0  0
  4 19  1  0  0  0  0
  4 20  1  0  0  0  0
  6 21  1  0  0  0  0
  6 22  1  0  0  0  0
  7 23  1  0  0  0  0
  7 24  1  0  0  0  0
  8 25  1  0  0  0  0
  9 26  1  0  0  0  0
  9 27  1  0  0  0  0
 10 28  1  0  0  0  0
 10 29  1  0  0  0  0
 11 30  1  0  0  0  0
M  END
$$$$
48
  Mrv0541 12152312282D          

 68 67  0  0  0  0            999 V2000
    8.4711    5.7158    0.0000 C   0  0  0  0  0  0  0  0  0  0  0  0
    9.1855    6.1283    0.0000 C   0  0  0  0  0  0  0  0  0  0  0  0
    9.9000    5.7158    0.0000 C   0  0  0  0  0  0  0  0  0  0  0  0
   10.6145    6.1283    0.0000 C   0  0  0  0  0  0  0  0  0  0  0  0
   11.3289    5.7158    0.0000 C   0  0  0  0  0  0  0  0  0  0  0  0
   11.3289    4.8908    0.0000 C   0  0  0  0  0  0  0  0  0  0  0  0
   12.0434    4.4783    0.0000 C   0  0  0  0  0  0  0  0  0  0  0  0
   12.0434    6.1283    0.0000 C   0  0  0  0  0  0  0  0  0  0  0  0
   12.7579    5.7158    0.0000 O   0  0  0  0  0  0  0  0  0  0  0  0
   13.4724    6.1283    0.0000 C   0  0  0  0  0  0  0  0  0  0  0  0
   13.4724    6.9533    0.0000 O   0  0  0  0  0  0  0  0  0  0  0  0
   14.1868    5.7158    0.0000 C   0  0  0  0  0  0  0  0  0  0  0  0
   14.9013    6.1283    0.0000 C   0  0  0  0  0  0  0  0  0  0  0  0
   15.6158    5.7158    0.0000 C   0  0  0  0  0  0  0  0  0  0  0  0
   16.3302    6.1283    0.0000 C   0  0  0  0  0  0  0  0  0  0  0  0
   17.0447    5.7158    0.0000 C   0  0  0  0  0  0  0  0  0  0  0  0
   17.0447    4.8908    0.0000 O   0  0  0  0  0  0  0  0  0  0  0  0
   17.7592    6.1283    0.0000 O   0  0  0  0  0  0  0  0  0  0  0  0
   18.4737    5.7158    0.0000 C   0  0  0  0  0  0  0  0  0  0  0  0
   19.1881    6.1283    0.0000 C   0  0  0  0  0  0  0  0  0  0  0  0
   19.1881    6.9533    0.0000 C   0  0  0  0  0  0  0  0  0  0  0  0
   19.9026    7.3658    0.0000 C   0  0  0  0  0  0  0  0  0  0  0  0
   19.9026    5.7158    0.0000 C   0  0  0  0  0  0  0  0  0  0  0  0
   20.6171    6.1283    0.0000 C   0  0  0  0  0  0  0  0  0  0  0  0
   21.3315    5.7158    0.0000 C   0  0  0  0  0  0  0  0  0  0  0  0
   22.0460    6.1283    0.0000 C   0  0  0  0  0  0  0  0  0  0  0  0
    8.0586    6.4302    0.0000 H   0  0  0  0  0  0  0  0  0  0  0  0
    7.7566    5.3033    0.0000 H   0  0  0  0  0  0  0  0  0  0  0  0
    8.8836    5.0013    0.0000 H   0  0  0  0  0  0  0  0  0  0  0  0
    8.7982    6.8567    0.0000 H   0  0  0  0  0  0  0  0  0  0  0  0
    9.5728    6.8567    0.0000 H   0  0  0  0  0  0  0  0  0  0  0  0
    9.5127    4.9873    0.0000 H   0  0  0  0  0  0  0  0  0  0  0  0
   10.2873    4.9873    0.0000 H   0  0  0  0  0  0  0  0  0  0  0  0
   10.2272    6.8567    0.0000 H   0  0  0  0  0  0  0  0  0  0  0  0
   11.0018    6.8567    0.0000 H   0  0  0  0  0  0  0  0  0  0  0  0
   10.7986    5.0838    0.0000 H   0  0  0  0  0  0  0  0  0  0  0  0
   10.5640    4.5817    0.0000 H   0  0  0  0  0  0  0  0  0  0  0  0
   10.8918    4.1911    0.0000 H   0  0  0  0  0  0  0  0  0  0  0  0
   11.6309    3.7638    0.0000 H   0  0  0  0  0  0  0  0  0  0  0  0
   12.7579    4.0658    0.0000 H   0  0  0  0  0  0  0  0  0  0  0  0
   12.4559    5.1927    0.0000 H   0  0  0  0  0  0  0  0  0  0  0  0
   11.6561    6.8567    0.0000 H   0  0  0  0  0  0  0  0  0  0  0  0
   12.4307    6.8567    0.0000 H   0  0  0  0  0  0  0  0  0  0  0  0
   13.7995    4.9873    0.0000 H   0  0  0  0  0  0  0  0  0  0  0  0
   14.5741    4.9873    0.0000 H   0  0  0  0  0  0  0  0  0  0  0  0
   14.5140    6.8567    0.0000 H   0  0  0  0  0  0  0  0  0  0  0  0
   15.2886    6.8567    0.0000 H   0  0  0  0  0  0  0  0  0  0  0  0
   15.2285    4.9873    0.0000 H   0  0  0  0  0  0  0  0  0  0  0  0
   16.0031    4.9873    0.0000 H   0  0  0  0  0  0  0  0  0  0  0  0
   15.9429    6.8567    0.0000 H   0  0  0  0  0  0  0  0  0  0  0  0
   16.7176    6.8567    0.0000 H   0  0  0  0  0  0  0  0  0  0  0  0
   18.0863    4.9873    0.0000 H   0  0  0  0  0  0  0  0  0  0  0  0
   18.8610    4.9873    0.0000 H   0  0  0  0  0  0  0  0  0  0  0  0
   18.4737    6.5408    0.0000 H   0  0  0  0  0  0  0  0  0  0  0  0
   18.3636    6.9821    0.0000 H   0  0  0  0  0  0  0  0  0  0  0  0
   18.7509    7.6529    0.0000 H   0  0  0  0  0  0  0  0  0  0  0  0
   20.5346    6.8355    0.0000 H   0  0  0  0  0  0  0  0  0  0  0  0
   20.6171    7.7783    0.0000 H   0  0  0  0  0  0  0  0  0  0  0  0
   19.4901    8.0802    0.0000 H   0  0  0  0  0  0  0  0  0  0  0  0
   19.5153    4.9873    0.0000 H   0  0  0  0  0  0  0  0  0  0  0  0
   20.2899    4.9873    0.0000 H   0  0  0  0  0  0  0  0  0  0  0  0
   20.2298    6.8567    0.0000 H   0  0  0  0  0  0  0  0  0  0  0  0
   21.0044    6.8567    0.0000 H   0  0  0  0  0  0  0  0  0  0  0  0
   20.9442    4.9873    0.0000 H   0  0  0  0  0  0  0  0  0  0  0  0
   21.7188    4.9873    0.0000 H   0  0  0  0  0  0  0  0  0  0  0  0
   22.4585    5.4138    0.0000 H   0  0  0  0  0  0  0  0  0  0  0  0
   22.7605    6.5408    0.0000 H   0  0  0  0  0  0  0  0  0  0  0  0
   21.6335    6.8427    0.0000 H   0  0  0  0  0  0  0  0  0  0  0  0
  1  2  1  0  0  0  0
  2  3  1  0  0  0  0
  3  4  1  0  0  0  0
  4  5  1  0  0  0  0
  5  6  1  0  0  0  0
  6  7  1  0  0  0  0
  5  8  1  0  0  0  0
  8  9  1  0  0  0  0
  9 10  1  0  0  0  0
 10 11  2  0  0  0  0
 10 12  1  0  0  0  0
 12 13  1  0  0  0  0
 13 14  1  0  0  0  0
 14 15  1  0  0  0  0
 15 16  1  0  0  0  0
 16 17  2  0  0  0  0
 16 18  1  0  0  0  0
 18 19  1  0  0  0  0
 19 20  1  0  0  0  0
 20 21  1  0  0  0  0
 21 22  1  0  0  0  0
 20 23  1  0  0  0  0
 23 24  1  0  0  0  0
 24 25  1  0  0  0  0
 25 26  1  0  0  0  0
  1 27  1  0  0  0  0
  1 28  1  0  0  0  0
  1 29  1  0  0  0  0
  2 30  1  0  0  0  0
  2 31  1  0  0  0  0
  3 32  1  0  0  0  0
  3 33  1  0  0  0  0
  4 34  1  0  0  0  0
  4 35  1  0  0  0  0
  5 36  1  0  0  0  0
  6 37  1  0  0  0  0
  6 38  1  0  0  0  0
  7 39  1  0  0  0  0
  7 40  1  0  0  0  0
  7 41  1  0  0  0  0
  8 42  1  0  0  0  0
  8 43  1  0  0  0  0
 12 44  1  0  0  0  0
 12 45  1  0  0  0  0
 13 46  1  0  0  0  0
 13 47  1  0  0  0  0
 14 48  1  0  0  0  0
 14 49  1  0  0  0  0
 15 50  1  0  0  0  0
 15 51  1  0  0  0  0
 19 52  1  0  0  0  0
 19 53  1  0  0  0  0
 20 54  1  0  0  0  0
 21 55  1  0  0  0  0
 21 56  1  0  0  0  0
 22 57  1  0  0  0  0
 22 58  1  0  0  0  0
 22 59  1  0  0  0  0
 23 60  1  0  0  0  0
 23 61  1  0  0  0  0
 24 62  1  0  0  0  0
 24 63  1  0  0  0  0
 25 64  1  0  0  0  0
 25 65  1  0  0  0  0
 26 66  1  0  0  0  0
 26 67  1  0  0  0  0
 26 68  1  0  0  0  0
M  END
$$$$
49
  Mrv0541 12152312282D          

 77 76  0  0  0  0            999 V2000
   11.6605    7.5572    0.0000 C   0  0  0  0  0  0  0  0  0  0  0  0
   12.3750    7.1447    0.0000 C   0  0  0  0  0  0  0  0  0  0  0  0
   13.0895    7.5572    0.0000 C   0  0  0  0  0  0  0  0  0  0  0  0
   13.8039    7.1447    0.0000 C   0  0  0  0  0  0  0  0  0  0  0  0
   14.5184    7.5572    0.0000 C   0  0  0  0  0  0  0  0  0  0  0  0
   14.5184    8.3822    0.0000 C   0  0  0  0  0  0  0  0  0  0  0  0
   15.2329    8.7947    0.0000 C   0  0  0  0  0  0  0  0  0  0  0  0
   15.2329    7.1447    0.0000 C   0  0  0  0  0  0  0  0  0  0  0  0
   15.9474    7.5572    0.0000 O   0  0  0  0  0  0  0  0  0  0  0  0
   16.6618    7.1447    0.0000 C   0  0  0  0  0  0  0  0  0  0  0  0
   16.6618    6.3197    0.0000 O   0  0  0  0  0  0  0  0  0  0  0  0
   17.3763    7.5572    0.0000 C   0  0  0  0  0  0  0  0  0  0  0  0
   18.0908    7.1447    0.0000 C   0  0  0  0  0  0  0  0  0  0  0  0
   18.8052    7.5572    0.0000 C   0  0  0  0  0  0  0  0  0  0  0  0
   19.5197    7.1447    0.0000 C   0  0  0  0  0  0  0  0  0  0  0  0
   20.2342    7.5572    0.0000 C   0  0  0  0  0  0  0  0  0  0  0  0
   20.9487    7.1447    0.0000 C   0  0  0  0  0  0  0  0  0  0  0  0
   21.6631    7.5572    0.0000 C   0  0  0  0  0  0  0  0  0  0  0  0
   22.3776    7.1447    0.0000 C   0  0  0  0  0  0  0  0  0  0  0  0
   22.3776    6.3197    0.0000 O   0  0  0  0  0  0  0  0  0  0  0  0
   23.0921    7.5572    0.0000 O   0  0  0  0  0  0  0  0  0  0  0  0
   23.8065    7.1447    0.0000 C   0  0  0  0  0  0  0  0  0  0  0  0
   24.5210    7.5572    0.0000 C   0  0  0  0  0  0  0  0  0  0  0  0
   24.5210    8.3822    0.0000 C   0  0  0  0  0  0  0  0  0  0  0  0
   25.2355    8.7947    0.0000 C   0  0  0  0  0  0  0  0  0  0  0  0
   25.2355    7.1447    0.0000 C   0  0  0  0  0  0  0  0  0  0  0  0
   25.9499    7.5572    0.0000 C   0  0  0  0  0  0  0  0  0  0  0  0
   26.6644    7.1447    0.0000 C   0  0  0  0  0  0  0  0  0  0  0  0
   27.3789    7.5572    0.0000 C   0  0  0  0  0  0  0  0  0  0  0  0
   12.0730    8.2717    0.0000 H   0  0  0  0  0  0  0  0  0  0  0  0
   10.9461    7.9697    0.0000 H   0  0  0  0  0  0  0  0  0  0  0  0
   11.2480    6.8427    0.0000 H   0  0  0  0  0  0  0  0  0  0  0  0
   11.9877    6.4163    0.0000 H   0  0  0  0  0  0  0  0  0  0  0  0
   12.7623    6.4163    0.0000 H   0  0  0  0  0  0  0  0  0  0  0  0
   12.7022    8.2856    0.0000 H   0  0  0  0  0  0  0  0  0  0  0  0
   13.2043    8.3742    0.0000 H   0  0  0  0  0  0  0  0  0  0  0  0
   13.4166    6.4163    0.0000 H   0  0  0  0  0  0  0  0  0  0  0  0
   14.1913    6.4163    0.0000 H   0  0  0  0  0  0  0  0  0  0  0  0
   13.8039    7.9697    0.0000 H   0  0  0  0  0  0  0  0  0  0  0  0
   13.7535    8.6913    0.0000 H   0  0  0  0  0  0  0  0  0  0  0  0
   14.0812    9.0818    0.0000 H   0  0  0  0  0  0  0  0  0  0  0  0
   15.6454    8.0802    0.0000 H   0  0  0  0  0  0  0  0  0  0  0  0
   15.9474    9.2072    0.0000 H   0  0  0  0  0  0  0  0  0  0  0  0
   14.8204    9.5092    0.0000 H   0  0  0  0  0  0  0  0  0  0  0  0
   14.8456    6.4163    0.0000 H   0  0  0  0  0  0  0  0  0  0  0  0
   15.6202    6.4163    0.0000 H   0  0  0  0  0  0  0  0  0  0  0  0
   16.9890    8.2856    0.0000 H   0  0  0  0  0  0  0  0  0  0  0  0
   17.7636    8.2856    0.0000 H   0  0  0  0  0  0  0  0  0  0  0  0
   17.7035    6.4163    0.0000 H   0  0  0  0  0  0  0  0  0  0  0  0
   18.4781    6.4163    0.0000 H   0  0  0  0  0  0  0  0  0  0  0  0
   18.4179    8.2856    0.0000 H   0  0  0  0  0  0  0  0  0  0  0  0
   19.1926    8.2856    0.0000 H   0  0  0  0  0  0  0  0  0  0  0  0
   19.1324    6.4163    0.0000 H   0  0  0  0  0  0  0  0  0  0  0  0
   19.9070    6.4163    0.0000 H   0  0  0  0  0  0  0  0  0  0  0  0
   19.8469    8.2856    0.0000 H   0  0  0  0  0  0  0  0  0  0  0  0
   20.6215    8.2856    0.0000 H   0  0  0  0  0  0  0  0  0  0  0  0
   20.5613    6.4163    0.0000 H   0  0  0  0  0  0  0  0  0  0  0  0
   21.3360    6.4163    0.0000 H   0  0  0  0  0  0  0  0  0  0  0  0
   21.2758    8.2856    0.0000 H   0  0  0  0  0  0  0  0  0  0  0  0
   22.0504    8.2856    0.0000 H   0  0  0  0  0  0  0  0  0  0  0  0
   23.4192    6.4163    0.0000 H   0  0  0  0  0  0  0  0  0  0  0  0
   24.1938    6.4163    0.0000 H   0  0  0  0  0  0  0  0  0  0  0  0
   23.8065    7.9697    0.0000 H   0  0  0  0  0  0  0  0  0  0  0  0
   23.6965    8.4110    0.0000 H   0  0  0  0  0  0  0  0  0  0  0  0
   24.0838    9.0818    0.0000 H   0  0  0  0  0  0  0  0  0  0  0  0
   25.8675    8.2644    0.0000 H   0  0  0  0  0  0  0  0  0  0  0  0
   25.9499    9.2072    0.0000 H   0  0  0  0  0  0  0  0  0  0  0  0
   24.8230    9.5092    0.0000 H   0  0  0  0  0  0  0  0  0  0  0  0
   24.8482    6.4163    0.0000 H   0  0  0  0  0  0  0  0  0  0  0  0
   25.6228    6.4163    0.0000 H   0  0  0  0  0  0  0  0  0  0  0  0
   25.5626    8.2856    0.0000 H   0  0  0  0  0  0  0  0  0  0  0  0
   26.3373    8.2856    0.0000 H   0  0  0  0  0  0  0  0  0  0  0  0
   26.2771    6.4163    0.0000 H   0  0  0  0  0  0  0  0  0  0  0  0
   27.0517    6.4163    0.0000 H   0  0  0  0  0  0  0  0  0  0  0  0
   27.7914    6.8427    0.0000 H   0  0  0  0  0  0  0  0  0  0  0  0
   28.0934    7.9697    0.0000 H   0  0  0  0  0  0  0  0  0  0  0  0
   26.9664    8.2717    0.0000 H   0  0  0  0  0  0  0  0  0  0  0  0
  1  2  1  0  0  0  0
  2  3  1  0  0  0  0
  3  4  1  0  0  0  0
  4  5  1  0  0  0  0
  5  6  1  0  0  0  0
  6  7  1  0  0  0  0
  5  8  1  0  0  0  0
  8  9  1  0  0  0  0
  9 10  1  0  0  0  0
 10 11  2  0  0  0  0
 10 12  1  0  0  0  0
 12 13  1  0  0  0  0
 13 14  1  0  0  0  0
 14 15  1  0  0  0  0
 15 16  1  0  0  0  0
 16 17  1  0  0  0  0
 17 18  1  0  0  0  0
 18 19  1  0  0  0  0
 19 20  2  0  0  0  0
 19 21  1  0  0  0  0
 21 22  1  0  0  0  0
 22 23  1  0  0  0  0
 23 24  1  0  0  0  0
 24 25  1  0  0  0  0
 23 26  1  0  0  0  0
 26 27  1  0  0  0  0
 27 28  1  0  0  0  0
 28 29  1  0  0  0  0
  1 30  1  0  0  0  0
  1 31  1  0  0  0  0
  1 32  1  0  0  0  0
  2 33  1  0  0  0  0
  2 34  1  0  0  0  0
  3 35  1  0  0  0  0
  3 36  1  0  0  0  0
  4 37  1  0  0  0  0
  4 38  1  0  0  0  0
  5 39  1  0  0  0  0
  6 40  1  0  0  0  0
  6 41  1  0  0  0  0
  7 42  1  0  0  0  0
  7 43  1  0  0  0  0
  7 44  1  0  0  0  0
  8 45  1  0  0  0  0
  8 46  1  0  0  0  0
 12 47  1  0  0  0  0
 12 48  1  0  0  0  0
 13 49  1  0  0  0  0
 13 50  1  0  0  0  0
 14 51  1  0  0  0  0
 14 52  1  0  0  0  0
 15 53  1  0  0  0  0
 15 54  1  0  0  0  0
 16 55  1  0  0  0  0
 16 56  1  0  0  0  0
 17 57  1  0  0  0  0
 17 58  1  0  0  0  0
 18 59  1  0  0  0  0
 18 60  1  0  0  0  0
 22 61  1  0  0  0  0
 22 62  1  0  0  0  0
 23 63  1  0  0  0  0
 24 64  1  0  0  0  0
 24 65  1  0  0  0  0
 25 66  1  0  0  0  0
 25 67  1  0  0  0  0
 25 68  1  0  0  0  0
 26 69  1  0  0  0  0
 26 70  1  0  0  0  0
 27 71  1  0  0  0  0
 27 72  1  0  0  0  0
 28 73  1  0  0  0  0
 28 74  1  0  0  0  0
 29 75  1  0  0  0  0
 29 76  1  0  0  0  0
 29 77  1  0  0  0  0
M  END
$$$$
50
  Mrv0541 12152312282D          

 24 25  0  0  0  0            999 V2000
    1.4289   -2.4750    0.0000 C   0  0  0  0  0  0  0  0  0  0  0  0
    2.1434   -2.8875    0.0000 C   0  0  0  0  0  0  0  0  0  0  0  0
    2.1434   -3.7125    0.0000 C   0  0  0  0  0  0  0  0  0  0  0  0
    1.4289   -4.1250    0.0000 C   0  0  0  0  0  0  0  0  0  0  0  0
    0.7145   -3.7125    0.0000 C   0  0  0  0  0  0  0  0  0  0  0  0
    0.7145   -2.8875    0.0000 C   0  0  0  0  0  0  0  0  0  0  0  0
    1.4289   -4.9500    0.0000 N   0  0  0  0  0  0  0  0  0  0  0  0
    2.1434   -5.3625    0.0000 N   0  0  0  0  0  0  0  0  0  0  0  0
    2.1434   -6.1875    0.0000 C   0  0  0  0  0  0  0  0  0  0  0  0
    2.8579   -6.6000    0.0000 C   0  0  0  0  0  0  0  0  0  0  0  0
    2.8579   -7.4250    0.0000 C   0  0  0  0  0  0  0  0  0  0  0  0
    2.1434   -7.8375    0.0000 C   0  0  0  0  0  0  0  0  0  0  0  0
    1.4289   -7.4250    0.0000 C   0  0  0  0  0  0  0  0  0  0  0  0
    1.4289   -6.6000    0.0000 C   0  0  0  0  0  0  0  0  0  0  0  0
    1.4289   -1.6500    0.0000 H   0  0  0  0  0  0  0  0  0  0  0  0
    2.8579   -2.4750    0.0000 H   0  0  0  0  0  0  0  0  0  0  0  0
    2.8579   -4.1250    0.0000 H   0  0  0  0  0  0  0  0  0  0  0  0
    0.0000   -4.1250    0.0000 H   0  0  0  0  0  0  0  0  0  0  0  0
    0.0000   -2.4750    0.0000 H   0  0  0  0  0  0  0  0  0  0  0  0
    3.5724   -6.1875    0.0000 H   0  0  0  0  0  0  0  0  0  0  0  0
    3.5724   -7.8375    0.0000 H   0  0  0  0  0  0  0  0  0  0  0  0
    2.1434   -8.6625    0.0000 H   0  0  0  0  0  0  0  0  0  0  0  0
    0.7145   -7.8375    0.0000 H   0  0  0  0  0  0  0  0  0  0  0  0
    0.7145   -6.1875    0.0000 H   0  0  0  0  0  0  0  0  0  0  0  0
  1  2  4  0  0  0  0
  2  3  4  0  0  0  0
  3  4  4  0  0  0  0
  4  5  4  0  0  0  0
  5  6  4  0  0  0  0
  1  6  4  0  0  0  0
  7  4  1  4  0  0  0
  7  8  2  0  0  0  0
  8  9  1  0  0  0  0
  9 10  4  0  0  0  0
 10 11  4  0  0  0  0
 11 12  4  0  0  0  0
 12 13  4  0  0  0  0
 13 14  4  0  0  0  0
  9 14  4  0  0  0  0
  1 15  1  0  0  0  0
  2 16  1  0  0  0  0
  3 17  1  0  0  0  0
  5 18  1  0  0  0  0
  6 19  1  0  0  0  0
 10 20  1  0  0  0  0
 11 21  1  0  0  0  0
 12 22  1  0  0  0  0
 13 23  1  0  0  0  0
 14 24  1  0  0  0  0
M  END
$$$$
51
  Mrv0541 12152312282D          

 41 44  0  0  0  0            999 V2000
   -2.8748   -0.8081    0.0000 C   0  0  0  0  0  0  0  0  0  0  0  0
   -2.4623   -0.0936    0.0000 C   0  0  0  0  0  0  0  0  0  0  0  0
   -2.0498    0.6209    0.0000 C   0  0  0  0  0  0  0  0  0  0  0  0
   -2.4623    1.3353    0.0000 N   0  0  0  0  0  0  0  0  0  0  0  0
   -3.2873    1.3353    0.0000 C   0  0  0  0  0  0  0  0  0  0  0  0
   -3.6998    0.6209    0.0000 O   0  0  0  0  0  0  0  0  0  0  0  0
   -3.6998    2.0498    0.0000 C   0  0  0  0  0  0  0  0  0  0  0  0
   -3.2873    2.7643    0.0000 O   0  0  0  0  0  0  0  0  0  0  0  0
   -2.4623    2.7643    0.0000 C   0  0  0  0  0  0  0  0  0  0  0  0
   -2.0498    3.4788    0.0000 C   0  0  0  0  0  0  0  0  0  0  0  0
   -1.2248    3.4788    0.0000 C   0  0  0  0  0  0  0  0  0  0  0  0
   -0.8123    2.7643    0.0000 C   0  0  0  0  0  0  0  0  0  0  0  0
   -1.2248    2.0498    0.0000 C   0  0  0  0  0  0  0  0  0  0  0  0
   -2.0498    2.0498    0.0000 C   0  0  0  0  0  0  0  0  0  0  0  0
    0.0127    2.7643    0.0000 N   0  0  0  0  0  0  0  0  0  0  0  0
    0.4976    2.0968    0.0000 C   0  0  0  0  0  0  0  0  0  0  0  0
    0.2427    1.3122    0.0000 O   0  0  0  0  0  0  0  0  0  0  0  0
    1.2822    2.3518    0.0000 C   0  0  0  0  0  0  0  0  0  0  0  0
    1.2822    3.1768    0.0000 C   0  0  0  0  0  0  0  0  0  0  0  0
    0.4976    3.4317    0.0000 C   0  0  0  0  0  0  0  0  0  0  0  0
    0.2427    4.2163    0.0000 O   0  0  0  0  0  0  0  0  0  0  0  0
    1.9967    3.5893    0.0000 C   0  0  0  0  0  0  0  0  0  0  0  0
    2.7112    3.1768    0.0000 C   0  0  0  0  0  0  0  0  0  0  0  0
    2.7112    2.3518    0.0000 C   0  0  0  0  0  0  0  0  0  0  0  0
    1.9967    1.9393    0.0000 C   0  0  0  0  0  0  0  0  0  0  0  0
   -0.8123    4.1932    0.0000 F   0  0  0  0  0  0  0  0  0  0  0  0
   -3.2873   -1.5225    0.0000 H   0  0  0  0  0  0  0  0  0  0  0  0
   -1.3214    0.2336    0.0000 H   0  0  0  0  0  0  0  0  0  0  0  0
   -1.3214    1.0082    0.0000 H   0  0  0  0  0  0  0  0  0  0  0  0
   -4.4282    1.6625    0.0000 H   0  0  0  0  0  0  0  0  0  0  0  0
   -4.4282    2.4371    0.0000 H   0  0  0  0  0  0  0  0  0  0  0  0
   -2.4623    4.1932    0.0000 H   0  0  0  0  0  0  0  0  0  0  0  0
   -0.8123    1.3353    0.0000 H   0  0  0  0  0  0  0  0  0  0  0  0
    1.6094    4.3177    0.0000 H   0  0  0  0  0  0  0  0  0  0  0  0
    2.3840    4.3177    0.0000 H   0  0  0  0  0  0  0  0  0  0  0  0
    3.1484    3.8764    0.0000 H   0  0  0  0  0  0  0  0  0  0  0  0
    3.5357    3.2056    0.0000 H   0  0  0  0  0  0  0  0  0  0  0  0
    3.5357    2.3230    0.0000 H   0  0  0  0  0  0  0  0  0  0  0  0
    3.1484    1.6521    0.0000 H   0  0  0  0  0  0  0  0  0  0  0  0
    2.3840    1.2109    0.0000 H   0  0  0  0  0  0  0  0  0  0  0  0
    1.6094    1.2109    0.0000 H   0  0  0  0  0  0  0  0  0  0  0  0
  1  2  3  0  0  0  0
  2  3  1  0  0  0  0
  3  4  1  0  0  0  0
  4  5  1  0  0  0  0
  5  6  2  0  0  0  0
  5  7  1  0  0  0  0
  7  8  1  0  0  0  0
  8  9  1  0  0  0  0
  9 10  4  0  0  0  0
 10 11  4  0  0  0  0
 11 12  4  0  0  0  0
 12 13  4  0  0  0  0
 13 14  4  0  0  0  0
  9 14  4  0  0  0  0
  4 14  1  0  0  0  0
 12 15  1  0  0  0  0
 15 16  1  0  0  0  0
 16 17  2  0  0  0  0
 16 18  1  0  0  0  0
 18 19  2  0  0  0  0
 19 20  1  0  0  0  0
 15 20  1  0  0  0  0
 20 21  2  0  0  0  0
 19 22  1  0  0  0  0
 22 23  1  0  0  0  0
 23 24  1  0  0  0  0
 24 25  1  0  0  0  0
 18 25  1  0  0  0  0
 11 26  1  0  0  0  0
  1 27  1  0  0  0  0
  3 28  1  0  0  0  0
  3 29  1  0  0  0  0
  7 30  1  0  0  0  0
  7 31  1  0  0  0  0
 10 32  1  0  0  0  0
 13 33  1  0  0  0  0
 22 34  1  0  0  0  0
 22 35  1  0  0  0  0
 23 36  1  0  0  0  0
 23 37  1  0  0  0  0
 24 38  1  0  0  0  0
 24 39  1  0  0  0  0
 25 40  1  0  0  0  0
 25 41  1  0  0  0  0
M  END
$$$$
52
  Mrv0541 12152312282D          

 42 42  0  0  0  0            999 V2000
    2.8579   -6.6000    0.0000 C   0  0  0  0  0  0  0  0  0  0  0  0
    3.5724   -6.1875    0.0000 C   0  0  0  0  0  0  0  0  0  0  0  0
    4.2868   -6.6000    0.0000 C   0  0  0  0  0  0  0  0  0  0  0  0
    5.0013   -6.1875    0.0000 C   0  0  0  0  0  0  0  0  0  0  0  0
    5.7158   -6.6000    0.0000 C   0  0  0  0  0  0  0  0  0  0  0  0
    6.4302   -6.1875    0.0000 C   0  0  0  0  0  0  0  0  0  0  0  0
    7.1447   -6.6000    0.0000 C   0  0  0  0  0  0  0  0  0  0  0  0
    7.8592   -6.1875    0.0000 C   0  0  0  0  0  0  0  0  0  0  0  0
    8.5737   -6.6000    0.0000 O   0  0  0  0  0  0  0  0  0  0  0  0
    9.2881   -6.1875    0.0000 C   0  0  0  0  0  0  0  0  0  0  0  0
    9.2881   -5.3625    0.0000 O   0  0  0  0  0  0  0  0  0  0  0  0
   10.0026   -6.6000    0.0000 C   0  0  0  0  0  0  0  0  0  0  0  0
   10.7171   -6.1875    0.0000 C   0  0  0  0  0  0  0  0  0  0  0  0
   11.4315   -6.6000    0.0000 C   0  0  0  0  0  0  0  0  0  0  0  0
   11.4315   -7.4250    0.0000 C   0  0  0  0  0  0  0  0  0  0  0  0
   10.7171   -7.8375    0.0000 C   0  0  0  0  0  0  0  0  0  0  0  0
   10.0026   -7.4250    0.0000 C   0  0  0  0  0  0  0  0  0  0  0  0
   10.7171   -8.6625    0.0000 O   0  0  0  0  0  0  0  0  0  0  0  0
   12.1460   -7.8375    0.0000 O   0  0  0  0  0  0  0  0  0  0  0  0
   12.1460   -6.1875    0.0000 O   0  0  0  0  0  0  0  0  0  0  0  0
    2.4454   -5.8855    0.0000 H   0  0  0  0  0  0  0  0  0  0  0  0
    2.1434   -7.0125    0.0000 H   0  0  0  0  0  0  0  0  0  0  0  0
    3.2704   -7.3145    0.0000 H   0  0  0  0  0  0  0  0  0  0  0  0
    3.1850   -5.4591    0.0000 H   0  0  0  0  0  0  0  0  0  0  0  0
    3.9597   -5.4591    0.0000 H   0  0  0  0  0  0  0  0  0  0  0  0
    3.8995   -7.3284    0.0000 H   0  0  0  0  0  0  0  0  0  0  0  0
    4.6741   -7.3284    0.0000 H   0  0  0  0  0  0  0  0  0  0  0  0
    4.6140   -5.4591    0.0000 H   0  0  0  0  0  0  0  0  0  0  0  0
    5.3886   -5.4591    0.0000 H   0  0  0  0  0  0  0  0  0  0  0  0
    5.3285   -7.3284    0.0000 H   0  0  0  0  0  0  0  0  0  0  0  0
    6.1031   -7.3284    0.0000 H   0  0  0  0  0  0  0  0  0  0  0  0
    6.0429   -5.4591    0.0000 H   0  0  0  0  0  0  0  0  0  0  0  0
    6.8176   -5.4591    0.0000 H   0  0  0  0  0  0  0  0  0  0  0  0
    6.7574   -7.3284    0.0000 H   0  0  0  0  0  0  0  0  0  0  0  0
    7.5320   -7.3284    0.0000 H   0  0  0  0  0  0  0  0  0  0  0  0
    7.4719   -5.4591    0.0000 H   0  0  0  0  0  0  0  0  0  0  0  0
    8.2465   -5.4591    0.0000 H   0  0  0  0  0  0  0  0  0  0  0  0
   10.7171   -5.3625    0.0000 H   0  0  0  0  0  0  0  0  0  0  0  0
    9.2881   -7.8375    0.0000 H   0  0  0  0  0  0  0  0  0  0  0  0
   10.0026   -9.0750    0.0000 H   0  0  0  0  0  0  0  0  0  0  0  0
   12.1460   -8.6625    0.0000 H   0  0  0  0  0  0  0  0  0  0  0  0
   12.8605   -6.6000    0.0000 H   0  0  0  0  0  0  0  0  0  0  0  0
  1  2  1  0  0  0  0
  2  3  1  0  0  0  0
  3  4  1  0  0  0  0
  4  5  1  0  0  0  0
  5  6  1  0  0  0  0
  6  7  1  0  0  0  0
  7  8  1  0  0  0  0
  8  9  1  0  0  0  0
  9 10  1  0  0  0  0
 10 11  2  0  0  0  0
 10 12  1  0  0  0  0
 12 13  4  0  0  0  0
 13 14  4  0  0  0  0
 14 15  4  0  0  0  0
 15 16  4  0  0  0  0
 16 17  4  0  0  0  0
 12 17  4  0  0  0  0
 16 18  1  0  0  0  0
 15 19  1  0  0  0  0
 14 20  1  0  0  0  0
  1 21  1  0  0  0  0
  1 22  1  0  0  0  0
  1 23  1  0  0  0  0
  2 24  1  0  0  0  0
  2 25  1  0  0  0  0
  3 26  1  0  0  0  0
  3 27  1  0  0  0  0
  4 28  1  0  0  0  0
  4 29  1  0  0  0  0
  5 30  1  0  0  0  0
  5 31  1  0  0  0  0
  6 32  1  0  0  0  0
  6 33  1  0  0  0  0
  7 34  1  0  0  0  0
  7 35  1  0  0  0  0
  8 36  1  0  0  0  0
  8 37  1  0  0  0  0
 13 38  1  0  0  0  0
 17 39  1  0  0  0  0
 18 40  1  0  0  0  0
 19 41  1  0  0  0  0
 20 42  1  0  0  0  0
M  END
$$$$
53
  Mrv0541 12152312282D          

 41 42  0  0  0  0            999 V2000
    4.9279    1.1104    0.0000 C   0  0  0  0  0  0  0  0  0  0  0  0
    4.2135    1.5229    0.0000 N   0  0  0  0  0  0  0  0  0  0  0  0
    3.4990    1.1104    0.0000 S   0  0  0  0  0  0  0  0  0  0  0  0
    3.0865    1.8249    0.0000 O   0  0  0  0  0  0  0  0  0  0  0  0
    3.9115    0.3960    0.0000 O   0  0  0  0  0  0  0  0  0  0  0  0
    2.7845    0.6979    0.0000 C   0  0  0  0  0  0  0  0  0  0  0  0
    2.0701    1.1104    0.0000 C   0  0  0  0  0  0  0  0  0  0  0  0
    1.3556    0.6979    0.0000 C   0  0  0  0  0  0  0  0  0  0  0  0
    0.6411    1.1104    0.0000 C   0  0  0  0  0  0  0  0  0  0  0  0
    0.6411    1.9354    0.0000 C   0  0  0  0  0  0  0  0  0  0  0  0
    1.3556    2.3479    0.0000 C   0  0  0  0  0  0  0  0  0  0  0  0
    2.0701    1.9354    0.0000 C   0  0  0  0  0  0  0  0  0  0  0  0
   -0.1435    2.1904    0.0000 N   0  0  0  0  0  0  0  0  0  0  0  0
   -0.6284    1.5229    0.0000 C   0  0  0  0  0  0  0  0  0  0  0  0
   -0.1435    0.8555    0.0000 C   0  0  0  0  0  0  0  0  0  0  0  0
   -0.3984    0.0709    0.0000 C   0  0  0  0  0  0  0  0  0  0  0  0
    0.1536   -0.5422    0.0000 C   0  0  0  0  0  0  0  0  0  0  0  0
   -0.1014   -1.3268    0.0000 N   0  0  0  0  0  0  0  0  0  0  0  0
   -0.9083   -1.4984    0.0000 C   0  0  0  0  0  0  0  0  0  0  0  0
    0.4507   -1.9399    0.0000 C   0  0  0  0  0  0  0  0  0  0  0  0
    4.5154    0.3960    0.0000 H   0  0  0  0  0  0  0  0  0  0  0  0
    5.6424    0.6979    0.0000 H   0  0  0  0  0  0  0  0  0  0  0  0
    5.3404    1.8249    0.0000 H   0  0  0  0  0  0  0  0  0  0  0  0
    4.2135    2.3479    0.0000 H   0  0  0  0  0  0  0  0  0  0  0  0
    3.1718   -0.0305    0.0000 H   0  0  0  0  0  0  0  0  0  0  0  0
    2.3972   -0.0305    0.0000 H   0  0  0  0  0  0  0  0  0  0  0  0
    1.3556   -0.1271    0.0000 H   0  0  0  0  0  0  0  0  0  0  0  0
    1.3556    3.1729    0.0000 H   0  0  0  0  0  0  0  0  0  0  0  0
    2.7845    2.3479    0.0000 H   0  0  0  0  0  0  0  0  0  0  0  0
   -0.3984    2.9750    0.0000 H   0  0  0  0  0  0  0  0  0  0  0  0
   -1.4534    1.5229    0.0000 H   0  0  0  0  0  0  0  0  0  0  0  0
   -1.1915    0.2983    0.0000 H   0  0  0  0  0  0  0  0  0  0  0  0
   -0.8109   -0.6436    0.0000 H   0  0  0  0  0  0  0  0  0  0  0  0
    0.7856   -0.0119    0.0000 H   0  0  0  0  0  0  0  0  0  0  0  0
    0.9466   -0.7696    0.0000 H   0  0  0  0  0  0  0  0  0  0  0  0
   -1.3455   -0.7987    0.0000 H   0  0  0  0  0  0  0  0  0  0  0  0
   -1.7153   -1.6699    0.0000 H   0  0  0  0  0  0  0  0  0  0  0  0
   -0.7368   -2.3053    0.0000 H   0  0  0  0  0  0  0  0  0  0  0  0
   -0.1624   -2.4920    0.0000 H   0  0  0  0  0  0  0  0  0  0  0  0
    1.0027   -2.5530    0.0000 H   0  0  0  0  0  0  0  0  0  0  0  0
    1.0638   -1.3879    0.0000 H   0  0  0  0  0  0  0  0  0  0  0  0
  1  2  1  0  0  0  0
  2  3  1  0  0  0  0
  3  4  2  0  0  0  0
  3  5  2  0  0  0  0
  3  6  1  0  0  0  0
  6  7  1  0  0  0  0
  7  8  4  0  0  0  0
  8  9  4  0  0  0  0
  9 10  4  0  0  0  0
 10 11  4  0  0  0  0
 11 12  4  0  0  0  0
  7 12  4  0  0  0  0
 10 13  4  0  0  0  0
 13 14  4  0  0  0  0
 14 15  4  0  0  0  0
  9 15  4  0  0  0  0
 15 16  1  0  0  0  0
 16 17  1  0  0  0  0
 17 18  1  0  0  0  0
 18 19  1  0  0  0  0
 18 20  1  0  0  0  0
  1 21  1  0  0  0  0
  1 22  1  0  0  0  0
  1 23  1  0  0  0  0
  2 24  1  0  0  0  0
  6 25  1  0  0  0  0
  6 26  1  0  0  0  0
  8 27  1  0  0  0  0
 11 28  1  0  0  0  0
 12 29  1  0  0  0  0
 13 30  1  0  0  0  0
 14 31  1  0  0  0  0
 16 32  1  0  0  0  0
 16 33  1  0  0  0  0
 17 34  1  0  0  0  0
 17 35  1  0  0  0  0
 19 36  1  0  0  0  0
 19 37  1  0  0  0  0
 19 38  1  0  0  0  0
 20 39  1  0  0  0  0
 20 40  1  0  0  0  0
 20 41  1  0  0  0  0
M  END
$$$$
54
  Mrv0541 12152312282D          

 20 20  0  0  0  0            999 V2000
    0.0000    3.3000    0.0000 C   0  0  0  0  0  0  0  0  0  0  0  0
    0.0000    2.4750    0.0000 C   0  0  0  0  0  0  0  0  0  0  0  0
    0.7145    2.0625    0.0000 N   0  0  0  0  0  0  0  0  0  0  0  0
    0.7145    1.2375    0.0000 C   0  0  0  0  0  0  0  0  0  0  0  0
    1.4289    0.8250    0.0000 C   0  0  0  0  0  0  0  0  0  0  0  0
    1.4289   -0.0000    0.0000 C   0  0  0  0  0  0  0  0  0  0  0  0
    0.7145   -0.4125    0.0000 C   0  0  0  0  0  0  0  0  0  0  0  0
    0.0000    0.0000    0.0000 C   0  0  0  0  0  0  0  0  0  0  0  0
    0.0000    0.8250    0.0000 C   0  0  0  0  0  0  0  0  0  0  0  0
    0.8250    3.3000    0.0000 H   0  0  0  0  0  0  0  0  0  0  0  0
    0.0000    4.1250    0.0000 H   0  0  0  0  0  0  0  0  0  0  0  0
   -0.8250    3.3000    0.0000 H   0  0  0  0  0  0  0  0  0  0  0  0
   -0.8245    2.4462    0.0000 H   0  0  0  0  0  0  0  0  0  0  0  0
   -0.4372    1.7754    0.0000 H   0  0  0  0  0  0  0  0  0  0  0  0
    1.4289    2.4750    0.0000 H   0  0  0  0  0  0  0  0  0  0  0  0
    2.1434    1.2375    0.0000 H   0  0  0  0  0  0  0  0  0  0  0  0
    2.1434   -0.4125    0.0000 H   0  0  0  0  0  0  0  0  0  0  0  0
    0.7145   -1.2375    0.0000 H   0  0  0  0  0  0  0  0  0  0  0  0
   -0.7145   -0.4125    0.0000 H   0  0  0  0  0  0  0  0  0  0  0  0
   -0.7145    1.2375    0.0000 H   0  0  0  0  0  0  0  0  0  0  0  0
  1  2  1  0  0  0  0
  2  3  1  0  0  0  0
  3  4  1  0  0  0  0
  4  5  4  0  0  0  0
  5  6  4  0  0  0  0
  6  7  4  0  0  0  0
  7  8  4  0  0  0  0
  8  9  4  0  0  0  0
  4  9  4  0  0  0  0
  1 10  1  0  0  0  0
  1 11  1  0  0  0  0
  1 12  1  0  0  0  0
  2 13  1  0  0  0  0
  2 14  1  0  0  0  0
  3 15  1  0  0  0  0
  5 16  1  0  0  0  0
  6 17  1  0  0  0  0
  7 18  1  0  0  0  0
  8 19  1  0  0  0  0
  9 20  1  0  0  0  0
M  END
$$$$
55
  Mrv0541 12152312282D          

 83 88  0  0  1  0            999 V2000
    9.6804    4.9115    0.0000 C   0  0  0  0  0  0  0  0  0  0  0  0
    8.9555    4.5175    0.0000 C   0  0  1  0  0  0  0  0  0  0  0  0
    8.2519    4.9482    0.0000 C   0  0  0  0  0  0  0  0  0  0  0  0
    7.5271    4.5542    0.0000 C   0  0  2  0  0  0  0  0  0  0  0  0
    7.5058    3.7295    0.0000 C   0  0  2  0  0  0  0  0  0  0  0  0
    6.7149    3.4948    0.0000 C   0  0  2  0  0  0  0  0  0  0  0  0
    6.2473    4.1745    0.0000 C   0  0  2  0  0  0  0  0  0  0  0  0
    6.7493    4.8293    0.0000 O   0  0  0  0  0  0  0  0  0  0  0  0
    5.8704    3.4407    0.0000 C   0  0  0  0  0  0  0  0  0  0  0  0
    5.0616    3.2779    0.0000 C   0  0  0  0  0  0  0  0  0  0  0  0
    4.4300    3.8087    0.0000 C   0  0  1  0  0  0  0  0  0  0  0  0
    3.6391    3.5740    0.0000 C   0  0  2  0  0  0  0  0  0  0  0  0
    3.2843    2.8292    0.0000 C   0  0  0  0  0  0  0  0  0  0  0  0
    2.4619    2.7641    0.0000 C   0  0  0  0  0  0  0  0  0  0  0  0
    1.9943    3.4438    0.0000 C   0  0  2  0  0  0  0  0  0  0  0  0
    1.1718    3.3787    0.0000 C   0  0  0  0  0  0  0  0  0  0  0  0
    0.7042    4.0584    0.0000 C   0  0  1  0  0  0  0  0  0  0  0  0
    1.0591    4.8032    0.0000 C   0  0  0  0  0  0  0  0  0  0  0  0
    1.8815    4.8683    0.0000 C   0  0  0  0  0  0  0  0  0  0  0  0
    2.3491    4.1886    0.0000 C   0  0  2  0  0  0  0  0  0  0  0  0
    3.1715    4.2537    0.0000 C   0  0  1  0  0  0  0  0  0  0  0  0
    3.6735    4.9084    0.0000 C   0  0  0  0  0  0  0  0  0  0  0  0
    4.4513    4.6334    0.0000 C   0  0  0  0  0  0  0  0  0  0  0  0
    5.1093    5.1310    0.0000 C   0  0  0  0  0  0  0  0  0  0  0  0
    5.9086    4.9268    0.0000 C   0  0  0  0  0  0  0  0  0  0  0  0
    4.9465    5.9398    0.0000 C   0  0  0  0  0  0  0  0  0  0  0  0
    2.7039    4.9334    0.0000 C   0  0  0  0  0  0  0  0  0  0  0  0
   -0.1182    3.9933    0.0000 N   0  0  0  0  0  0  0  0  0  0  0  0
   -0.4730    3.2485    0.0000 S   0  0  0  0  0  0  0  0  0  0  0  0
   -0.8279    2.5037    0.0000 O   0  0  0  0  0  0  0  0  0  0  0  0
   -1.2178    3.6033    0.0000 O   0  0  0  0  0  0  0  0  0  0  0  0
    0.2718    2.8937    0.0000 C   0  0  0  0  0  0  0  0  0  0  0  0
    6.4399    2.7170    0.0000 C   0  0  0  0  0  0  0  0  0  0  0  0
    8.2095    3.2988    0.0000 N   0  0  0  0  0  0  0  0  0  0  0  0
    8.9343    3.6928    0.0000 C   0  0  0  0  0  0  0  0  0  0  0  0
   10.0744    4.1866    0.0000 H   0  0  0  0  0  0  0  0  0  0  0  0
   10.4052    5.3054    0.0000 H   0  0  0  0  0  0  0  0  0  0  0  0
    9.2864    5.6363    0.0000 H   0  0  0  0  0  0  0  0  0  0  0  0
    8.9768    5.3422    0.0000 H   0  0  0  0  0  0  0  0  0  0  0  0
    8.6578    5.6665    0.0000 H   0  0  0  0  0  0  0  0  0  0  0  0
    7.8835    5.6864    0.0000 H   0  0  0  0  0  0  0  0  0  0  0  0
    7.4620    5.3767    0.0000 H   0  0  0  0  0  0  0  0  0  0  0  0
    7.6848    2.9242    0.0000 H   0  0  0  0  0  0  0  0  0  0  0  0
    7.0442    2.7384    0.0000 H   0  0  0  0  0  0  0  0  0  0  0  0
    6.6125    3.0803    0.0000 H   0  0  0  0  0  0  0  0  0  0  0  0
    6.0150    2.6285    0.0000 H   0  0  0  0  0  0  0  0  0  0  0  0
    5.2425    2.4730    0.0000 H   0  0  0  0  0  0  0  0  0  0  0  0
    4.5168    2.6584    0.0000 H   0  0  0  0  0  0  0  0  0  0  0  0
    4.5483    2.9922    0.0000 H   0  0  0  0  0  0  0  0  0  0  0  0
    3.9284    2.8014    0.0000 H   0  0  0  0  0  0  0  0  0  0  0  0
    4.0162    2.4486    0.0000 H   0  0  0  0  0  0  0  0  0  0  0  0
    3.3780    2.0096    0.0000 H   0  0  0  0  0  0  0  0  0  0  0  0
    2.4982    1.9399    0.0000 H   0  0  0  0  0  0  0  0  0  0  0  0
    1.7989    2.2731    0.0000 H   0  0  0  0  0  0  0  0  0  0  0  0
    1.9156    2.6226    0.0000 H   0  0  0  0  0  0  0  0  0  0  0  0
    0.6699    2.7240    0.0000 H   0  0  0  0  0  0  0  0  0  0  0  0
    0.5089    2.8877    0.0000 H   0  0  0  0  0  0  0  0  0  0  0  0
    0.3494    3.3136    0.0000 H   0  0  0  0  0  0  0  0  0  0  0  0
    0.3271    5.1838    0.0000 H   0  0  0  0  0  0  0  0  0  0  0  0
    0.9653    5.6228    0.0000 H   0  0  0  0  0  0  0  0  0  0  0  0
    1.8451    5.6925    0.0000 H   0  0  0  0  0  0  0  0  0  0  0  0
    2.5445    5.3593    0.0000 H   0  0  0  0  0  0  0  0  0  0  0  0
    3.0492    5.0696    0.0000 H   0  0  0  0  0  0  0  0  0  0  0  0
    2.9202    5.2450    0.0000 H   0  0  0  0  0  0  0  0  0  0  0  0
    3.8573    5.7127    0.0000 H   0  0  0  0  0  0  0  0  0  0  0  0
    6.0948    5.7305    0.0000 H   0  0  0  0  0  0  0  0  0  0  0  0
    6.6683    5.2486    0.0000 H   0  0  0  0  0  0  0  0  0  0  0  0
    5.7552    6.1026    0.0000 H   0  0  0  0  0  0  0  0  0  0  0  0
    4.7836    6.7486    0.0000 H   0  0  0  0  0  0  0  0  0  0  0  0
    4.1377    5.7770    0.0000 H   0  0  0  0  0  0  0  0  0  0  0  0
    3.4487    4.5786    0.0000 H   0  0  0  0  0  0  0  0  0  0  0  0
    2.7826    5.7546    0.0000 H   0  0  0  0  0  0  0  0  0  0  0  0
    1.9591    5.2882    0.0000 H   0  0  0  0  0  0  0  0  0  0  0  0
   -0.5858    4.6730    0.0000 H   0  0  0  0  0  0  0  0  0  0  0  0
   -0.0831    2.1489    0.0000 H   0  0  0  0  0  0  0  0  0  0  0  0
    1.0930    2.8150    0.0000 H   0  0  0  0  0  0  0  0  0  0  0  0
    0.6266    3.6385    0.0000 H   0  0  0  0  0  0  0  0  0  0  0  0
    5.6621    2.9921    0.0000 H   0  0  0  0  0  0  0  0  0  0  0  0
    6.1648    1.9392    0.0000 H   0  0  0  0  0  0  0  0  0  0  0  0
    7.2177    2.4420    0.0000 H   0  0  0  0  0  0  0  0  0  0  0  0
    8.1882    2.4740    0.0000 H   0  0  0  0  0  0  0  0  0  0  0  0
    9.3534    2.9821    0.0000 H   0  0  0  0  0  0  0  0  0  0  0  0
    9.7578    3.6428    0.0000 H   0  0  0  0  0  0  0  0  0  0  0  0
  2  1  1  6  0  0  0
  2  3  1  0  0  0  0
  3  4  1  0  0  0  0
  4  5  1  0  0  0  0
  5  6  1  0  0  0  0
  6  7  1  0  0  0  0
  7  8  1  1  0  0  0
  4  8  1  0  0  0  0
  7  9  1  0  0  0  0
  9 10  1  0  0  0  0
 10 11  1  0  0  0  0
 11 12  1  0  0  0  0
 12 13  1  0  0  0  0
 13 14  1  0  0  0  0
 14 15  1  0  0  0  0
 15 16  1  0  0  0  0
 16 17  1  0  0  0  0
 17 18  1  0  0  0  0
 18 19  1  0  0  0  0
 19 20  1  0  0  0  0
 15 20  1  0  0  0  0
 20 21  1  0  0  0  0
 12 21  1  0  0  0  0
 21 22  1  0  0  0  0
 22 23  1  0  0  0  0
 11 23  1  0  0  0  0
 23 24  2  0  0  0  0
 24 25  1  0  0  0  0
  7 25  1  0  0  0  0
 24 26  1  0  0  0  0
 20 27  1  1  0  0  0
 17 28  1  6  0  0  0
 28 29  1  0  0  0  0
 29 30  2  0  0  0  0
 29 31  2  0  0  0  0
 29 32  1  0  0  0  0
  6 33  1  1  0  0  0
  5 34  1  0  0  0  0
 34 35  1  0  0  0  0
  2 35  1  0  0  0  0
  1 36  1  0  0  0  0
  1 37  1  0  0  0  0
  1 38  1  0  0  0  0
  2 39  1  1  0  0  0
  3 40  1  0  0  0  0
  3 41  1  0  0  0  0
  4 42  1  1  0  0  0
  5 43  1  6  0  0  0
  6 44  1  6  0  0  0
  9 45  1  0  0  0  0
  9 46  1  0  0  0  0
 10 47  1  0  0  0  0
 10 48  1  0  0  0  0
 11 49  1  6  0  0  0
 12 50  1  1  0  0  0
 13 51  1  0  0  0  0
 13 52  1  0  0  0  0
 14 53  1  0  0  0  0
 14 54  1  0  0  0  0
 15 55  1  1  0  0  0
 16 56  1  0  0  0  0
 16 57  1  0  0  0  0
 17 58  1  1  0  0  0
 18 59  1  0  0  0  0
 18 60  1  0  0  0  0
 19 61  1  0  0  0  0
 19 62  1  0  0  0  0
 21 63  1  6  0  0  0
 22 64  1  0  0  0  0
 22 65  1  0  0  0  0
 25 66  1  0  0  0  0
 25 67  1  0  0  0  0
 26 68  1  0  0  0  0
 26 69  1  0  0  0  0
 26 70  1  0  0  0  0
 27 71  1  0  0  0  0
 27 72  1  0  0  0  0
 27 73  1  0  0  0  0
 28 74  1  0  0  0  0
 32 75  1  0  0  0  0
 32 76  1  0  0  0  0
 32 77  1  0  0  0  0
 33 78  1  0  0  0  0
 33 79  1  0  0  0  0
 33 80  1  0  0  0  0
 34 81  1  0  0  0  0
 35 82  1  0  0  0  0
 35 83  1  0  0  0  0
M  END
$$$$
56
  Mrv0541 12152312282D          

 37 39  0  0  0  0            999 V2000
   -0.9269    2.8123    0.0000 C   0  0  0  0  0  0  0  0  0  0  0  0
   -0.4125    3.4573    0.0000 C   0  0  0  0  0  0  0  0  0  0  0  0
    0.4125    3.4573    0.0000 N   0  0  0  0  0  0  0  0  0  0  0  0
    0.9269    2.8123    0.0000 C   0  0  0  0  0  0  0  0  0  0  0  0
    0.7433    2.0080    0.0000 C   0  0  0  0  0  0  0  0  0  0  0  0
    0.0000    1.6500    0.0000 N   0  0  0  0  0  0  0  0  0  0  0  0
   -0.7433    2.0080    0.0000 C   0  0  0  0  0  0  0  0  0  0  0  0
    0.0000    0.8250    0.0000 S   0  0  0  0  0  0  0  0  0  0  0  0
   -0.8250    0.8250    0.0000 O   0  0  0  0  0  0  0  0  0  0  0  0
    0.8250    0.8250    0.0000 O   0  0  0  0  0  0  0  0  0  0  0  0
    0.0000   -0.0000    0.0000 C   0  0  0  0  0  0  0  0  0  0  0  0
   -0.7145   -0.4125    0.0000 C   0  0  0  0  0  0  0  0  0  0  0  0
   -0.7145   -1.2375    0.0000 C   0  0  0  0  0  0  0  0  0  0  0  0
    0.0000   -1.6500    0.0000 C   0  0  0  0  0  0  0  0  0  0  0  0
    0.7145   -1.2375    0.0000 C   0  0  0  0  0  0  0  0  0  0  0  0
    0.7145   -0.4125    0.0000 C   0  0  0  0  0  0  0  0  0  0  0  0
    1.4289   -0.0000    0.0000 C   0  0  0  0  0  0  0  0  0  0  0  0
    2.1434   -0.4125    0.0000 C   0  0  0  0  0  0  0  0  0  0  0  0
    2.1434   -1.2375    0.0000 N   0  0  0  0  0  0  0  0  0  0  0  0
    1.4289   -1.6500    0.0000 C   0  0  0  0  0  0  0  0  0  0  0  0
   -1.5602    3.3410    0.0000 H   0  0  0  0  0  0  0  0  0  0  0  0
   -1.7269    2.6107    0.0000 H   0  0  0  0  0  0  0  0  0  0  0  0
   -1.0689    3.9571    0.0000 H   0  0  0  0  0  0  0  0  0  0  0  0
   -0.3940    4.2821    0.0000 H   0  0  0  0  0  0  0  0  0  0  0  0
    0.7705    4.2006    0.0000 H   0  0  0  0  0  0  0  0  0  0  0  0
    1.5602    3.3410    0.0000 H   0  0  0  0  0  0  0  0  0  0  0  0
    1.7269    2.6107    0.0000 H   0  0  0  0  0  0  0  0  0  0  0  0
    1.5515    1.8425    0.0000 H   0  0  0  0  0  0  0  0  0  0  0  0
    1.0845    1.2568    0.0000 H   0  0  0  0  0  0  0  0  0  0  0  0
   -1.0845    1.2568    0.0000 H   0  0  0  0  0  0  0  0  0  0  0  0
   -1.5515    1.8425    0.0000 H   0  0  0  0  0  0  0  0  0  0  0  0
   -1.4289   -0.0000    0.0000 H   0  0  0  0  0  0  0  0  0  0  0  0
   -1.4289   -1.6500    0.0000 H   0  0  0  0  0  0  0  0  0  0  0  0
    0.0000   -2.4750    0.0000 H   0  0  0  0  0  0  0  0  0  0  0  0
    1.4289    0.8250    0.0000 H   0  0  0  0  0  0  0  0  0  0  0  0
    2.8579   -0.0000    0.0000 H   0  0  0  0  0  0  0  0  0  0  0  0
    1.4289   -2.4750    0.0000 H   0  0  0  0  0  0  0  0  0  0  0  0
  1  2  1  0  0  0  0
  2  3  1  0  0  0  0
  3  4  1  0  0  0  0
  4  5  1  0  0  0  0
  5  6  1  0  0  0  0
  6  7  1  0  0  0  0
  1  7  1  0  0  0  0
  6  8  1  0  0  0  0
  8  9  2  0  0  0  0
  8 10  2  0  0  0  0
  8 11  1  0  0  0  0
 11 12  4  0  0  0  0
 12 13  4  0  0  0  0
 13 14  4  0  0  0  0
 14 15  4  0  0  0  0
 15 16  4  0  0  0  0
 11 16  4  0  0  0  0
 16 17  4  0  0  0  0
 17 18  4  0  0  0  0
 18 19  4  0  0  0  0
 19 20  4  0  0  0  0
 15 20  4  0  0  0  0
  1 21  1  0  0  0  0
  1 22  1  0  0  0  0
  2 23  1  0  0  0  0
  2 24  1  0  0  0  0
  3 25  1  0  0  0  0
  4 26  1  0  0  0  0
  4 27  1  0  0  0  0
  5 28  1  0  0  0  0
  5 29  1  0  0  0  0
  7 30  1  0  0  0  0
  7 31  1  0  0  0  0
 12 32  1  0  0  0  0
 13 33  1  0  0  0  0
 14 34  1  0  0  0  0
 17 35  1  0  0  0  0
 18 36  1  0  0  0  0
 20 37  1  0  0  0  0
M  END
$$$$
57
  Mrv0541 12152312282D          

 20 20  0  0  0  0            999 V2000
    0.0000    3.3000    0.0000 C   0  0  0  0  0  0  0  0  0  0  0  0
    0.0000    2.4750    0.0000 C   0  0  0  0  0  0  0  0  0  0  0  0
   -0.7145    2.0625    0.0000 O   0  0  0  0  0  0  0  0  0  0  0  0
    0.7145    2.0625    0.0000 N   0  0  0  0  0  0  0  0  0  0  0  0
    0.7145    1.2375    0.0000 C   0  0  0  0  0  0  0  0  0  0  0  0
    1.4289    0.8250    0.0000 C   0  0  0  0  0  0  0  0  0  0  0  0
    1.4289   -0.0000    0.0000 C   0  0  0  0  0  0  0  0  0  0  0  0
    0.7145   -0.4125    0.0000 C   0  0  0  0  0  0  0  0  0  0  0  0
    0.0000    0.0000    0.0000 C   0  0  0  0  0  0  0  0  0  0  0  0
    0.0000    0.8250    0.0000 C   0  0  0  0  0  0  0  0  0  0  0  0
    0.7145   -1.2375    0.0000 O   0  0  0  0  0  0  0  0  0  0  0  0
    0.8250    3.3000    0.0000 H   0  0  0  0  0  0  0  0  0  0  0  0
    0.0000    4.1250    0.0000 H   0  0  0  0  0  0  0  0  0  0  0  0
   -0.8250    3.3000    0.0000 H   0  0  0  0  0  0  0  0  0  0  0  0
    1.4289    2.4750    0.0000 H   0  0  0  0  0  0  0  0  0  0  0  0
    2.1434    1.2375    0.0000 H   0  0  0  0  0  0  0  0  0  0  0  0
    2.1434   -0.4125    0.0000 H   0  0  0  0  0  0  0  0  0  0  0  0
   -0.7145   -0.4125    0.0000 H   0  0  0  0  0  0  0  0  0  0  0  0
   -0.7145    1.2375    0.0000 H   0  0  0  0  0  0  0  0  0  0  0  0
   -0.0000   -1.6500    0.0000 H   0  0  0  0  0  0  0  0  0  0  0  0
  1  2  1  0  0  0  0
  2  3  2  0  0  0  0
  2  4  1  0  0  0  0
  4  5  1  0  0  0  0
  5  6  4  0  0  0  0
  6  7  4  0  0  0  0
  7  8  4  0  0  0  0
  8  9  4  0  0  0  0
  9 10  4  0  0  0  0
  5 10  4  0  0  0  0
  8 11  1  0  0  0  0
  1 12  1  0  0  0  0
  1 13  1  0  0  0  0
  1 14  1  0  0  0  0
  4 15  1  0  0  0  0
  6 16  1  0  0  0  0
  7 17  1  0  0  0  0
  9 18  1  0  0  0  0
 10 19  1  0  0  0  0
 11 20  1  0  0  0  0
M  END
$$$$
58
  Mrv0541 12152312282D          

 37 38  0  0  0  0            999 V2000
   -1.6377   -0.4732    0.0000 C   0  0  0  0  0  0  0  0  0  0  0  0
   -1.1528    0.1942    0.0000 C   0  0  0  0  0  0  0  0  0  0  0  0
   -1.4884    0.9479    0.0000 C   0  0  0  0  0  0  0  0  0  0  0  0
   -1.0034    1.6153    0.0000 C   0  0  0  0  0  0  0  0  0  0  0  0
   -0.1830    1.5291    0.0000 C   0  0  0  0  0  0  0  0  0  0  0  0
    0.1526    0.7754    0.0000 N   0  0  0  0  0  0  0  0  0  0  0  0
   -0.3323    0.1080    0.0000 C   0  0  0  0  0  0  0  0  0  0  0  0
    0.3020    2.1965    0.0000 C   0  0  0  0  0  0  0  0  0  0  0  0
    0.0470    2.9812    0.0000 N   0  0  0  0  0  0  0  0  0  0  0  0
    0.7145    3.4661    0.0000 C   0  0  0  0  0  0  0  0  0  0  0  0
    1.3819    2.9812    0.0000 C   0  0  0  0  0  0  0  0  0  0  0  0
    2.1665    3.2361    0.0000 O   0  0  0  0  0  0  0  0  0  0  0  0
    1.1270    2.1965    0.0000 N   0  0  0  0  0  0  0  0  0  0  0  0
    0.3095    4.1848    0.0000 C   0  0  0  0  0  0  0  0  0  0  0  0
    1.1195    4.1848    0.0000 C   0  0  0  0  0  0  0  0  0  0  0  0
    0.6995    4.8949    0.0000 C   0  0  0  0  0  0  0  0  0  0  0  0
    1.9444    4.1935    0.0000 C   0  0  0  0  0  0  0  0  0  0  0  0
   -1.3390    2.3690    0.0000 C   0  0  0  0  0  0  0  0  0  0  0  0
   -0.8541    3.0364    0.0000 O   0  0  0  0  0  0  0  0  0  0  0  0
   -2.1595    2.4552    0.0000 O   0  0  0  0  0  0  0  0  0  0  0  0
   -2.3052    0.0117    0.0000 H   0  0  0  0  0  0  0  0  0  0  0  0
   -2.1226   -1.1407    0.0000 H   0  0  0  0  0  0  0  0  0  0  0  0
   -0.9703   -0.9581    0.0000 H   0  0  0  0  0  0  0  0  0  0  0  0
   -2.3088    1.0341    0.0000 H   0  0  0  0  0  0  0  0  0  0  0  0
    0.0032   -0.6457    0.0000 H   0  0  0  0  0  0  0  0  0  0  0  0
    1.6119    1.5291    0.0000 H   0  0  0  0  0  0  0  0  0  0  0  0
    1.0282    4.5898    0.0000 H   0  0  0  0  0  0  0  0  0  0  0  0
   -0.0955    4.9036    0.0000 H   0  0  0  0  0  0  0  0  0  0  0  0
   -0.4093    3.7798    0.0000 H   0  0  0  0  0  0  0  0  0  0  0  0
    0.3413    4.4589    0.0000 H   0  0  0  0  0  0  0  0  0  0  0  0
    1.4096    5.3149    0.0000 H   0  0  0  0  0  0  0  0  0  0  0  0
    0.2795    5.6050    0.0000 H   0  0  0  0  0  0  0  0  0  0  0  0
   -0.0106    4.4750    0.0000 H   0  0  0  0  0  0  0  0  0  0  0  0
    2.4813    3.5671    0.0000 H   0  0  0  0  0  0  0  0  0  0  0  0
    2.7694    4.2021    0.0000 H   0  0  0  0  0  0  0  0  0  0  0  0
    1.9358    5.0184    0.0000 H   0  0  0  0  0  0  0  0  0  0  0  0
   -2.4950    3.2089    0.0000 H   0  0  0  0  0  0  0  0  0  0  0  0
  1  2  1  0  0  0  0
  2  3  4  0  0  0  0
  3  4  4  0  0  0  0
  4  5  4  0  0  0  0
  5  6  4  0  0  0  0
  6  7  4  0  0  0  0
  2  7  4  0  0  0  0
  5  8  1  0  0  0  0
  8  9  2  0  0  0  0
  9 10  1  0  0  0  0
 10 11  1  0  0  0  0
 11 12  2  0  0  0  0
 11 13  1  0  0  0  0
  8 13  1  0  0  0  0
 10 14  1  0  0  0  0
 10 15  1  0  0  0  0
 15 16  1  0  0  0  0
 15 17  1  0  0  0  0
  4 18  1  0  0  0  0
 18 19  2  0  0  0  0
 18 20  1  0  0  0  0
  1 21  1  0  0  0  0
  1 22  1  0  0  0  0
  1 23  1  0  0  0  0
  3 24  1  0  0  0  0
  7 25  1  0  0  0  0
 13 26  1  0  0  0  0
 14 27  1  0  0  0  0
 14 28  1  0  0  0  0
 14 29  1  0  0  0  0
 15 30  1  0  0  0  0
 16 31  1  0  0  0  0
 16 32  1  0  0  0  0
 16 33  1  0  0  0  0
 17 34  1  0  0  0  0
 17 35  1  0  0  0  0
 17 36  1  0  0  0  0
 20 37  1  0  0  0  0
M  END
$$$$
59
  Mrv0541 12152312282D          

 26 26  0  0  0  0            999 V2000
   -0.7145    3.7125    0.0000 C   0  0  0  0  0  0  0  0  0  0  0  0
    0.0000    3.3000    0.0000 C   0  0  0  0  0  0  0  0  0  0  0  0
    0.0000    2.4750    0.0000 C   0  0  0  0  0  0  0  0  0  0  0  0
    0.7145    2.0625    0.0000 C   0  0  0  0  0  0  0  0  0  0  0  0
    0.7145    1.2375    0.0000 C   0  0  0  0  0  0  0  0  0  0  0  0
    1.4289    0.8250    0.0000 C   0  0  0  0  0  0  0  0  0  0  0  0
    1.4289   -0.0000    0.0000 C   0  0  0  0  0  0  0  0  0  0  0  0
    0.7145   -0.4125    0.0000 C   0  0  0  0  0  0  0  0  0  0  0  0
    0.0000    0.0000    0.0000 C   0  0  0  0  0  0  0  0  0  0  0  0
    0.0000    0.8250    0.0000 C   0  0  0  0  0  0  0  0  0  0  0  0
    0.7145   -1.2375    0.0000 N   0  0  0  0  0  0  0  0  0  0  0  0
   -0.3020    4.4270    0.0000 H   0  0  0  0  0  0  0  0  0  0  0  0
   -1.4289    4.1250    0.0000 H   0  0  0  0  0  0  0  0  0  0  0  0
   -1.1270    2.9980    0.0000 H   0  0  0  0  0  0  0  0  0  0  0  0
    0.4372    3.9996    0.0000 H   0  0  0  0  0  0  0  0  0  0  0  0
    0.8245    3.3288    0.0000 H   0  0  0  0  0  0  0  0  0  0  0  0
   -0.8245    2.4462    0.0000 H   0  0  0  0  0  0  0  0  0  0  0  0
   -0.4372    1.7754    0.0000 H   0  0  0  0  0  0  0  0  0  0  0  0
    1.1517    2.7621    0.0000 H   0  0  0  0  0  0  0  0  0  0  0  0
    1.5390    2.0913    0.0000 H   0  0  0  0  0  0  0  0  0  0  0  0
    2.1434    1.2375    0.0000 H   0  0  0  0  0  0  0  0  0  0  0  0
    2.1434   -0.4125    0.0000 H   0  0  0  0  0  0  0  0  0  0  0  0
   -0.7145   -0.4125    0.0000 H   0  0  0  0  0  0  0  0  0  0  0  0
   -0.7145    1.2375    0.0000 H   0  0  0  0  0  0  0  0  0  0  0  0
   -0.0000   -1.6500    0.0000 H   0  0  0  0  0  0  0  0  0  0  0  0
    1.4289   -1.6500    0.0000 H   0  0  0  0  0  0  0  0  0  0  0  0
  1  2  1  0  0  0  0
  2  3  1  0  0  0  0
  3  4  1  0  0  0  0
  4  5  1  0  0  0  0
  5  6  4  0  0  0  0
  6  7  4  0  0  0  0
  7  8  4  0  0  0  0
  8  9  4  0  0  0  0
  9 10  4  0  0  0  0
  5 10  4  0  0  0  0
  8 11  1  0  0  0  0
  1 12  1  0  0  0  0
  1 13  1  0  0  0  0
  1 14  1  0  0  0  0
  2 15  1  0  0  0  0
  2 16  1  0  0  0  0
  3 17  1  0  0  0  0
  3 18  1  0  0  0  0
  4 19  1  0  0  0  0
  4 20  1  0  0  0  0
  6 21  1  0  0  0  0
  7 22  1  0  0  0  0
  9 23  1  0  0  0  0
 10 24  1  0  0  0  0
 11 25  1  0  0  0  0
 11 26  1  0  0  0  0
M  END
$$$$
60
  Mrv0541 12152312282D          

 36 37  0  0  0  0            999 V2000
    2.1434    0.4125    0.0000 C   0  0  0  0  0  0  0  0  0  0  0  0
    2.1434   -0.4125    0.0000 S   0  0  0  0  0  0  0  0  0  0  0  0
    1.3184   -0.4125    0.0000 O   0  0  0  0  0  0  0  0  0  0  0  0
    2.9684   -0.4125    0.0000 O   0  0  0  0  0  0  0  0  0  0  0  0
    2.1434   -1.2375    0.0000 C   0  0  0  0  0  0  0  0  0  0  0  0
    2.8579   -1.6500    0.0000 C   0  0  0  0  0  0  0  0  0  0  0  0
    2.8579   -2.4750    0.0000 C   0  0  0  0  0  0  0  0  0  0  0  0
    2.1434   -2.8875    0.0000 C   0  0  0  0  0  0  0  0  0  0  0  0
    1.4289   -2.4750    0.0000 C   0  0  0  0  0  0  0  0  0  0  0  0
    1.4289   -1.6500    0.0000 C   0  0  0  0  0  0  0  0  0  0  0  0
    2.1434   -3.7125    0.0000 C   0  0  0  0  0  0  0  0  0  0  0  0
    2.8579   -4.1250    0.0000 O   0  0  0  0  0  0  0  0  0  0  0  0
    1.4289   -4.1250    0.0000 C   0  0  0  0  0  0  0  0  0  0  0  0
    1.4289   -4.9500    0.0000 C   0  0  0  0  0  0  0  0  0  0  0  0
    2.1434   -5.3625    0.0000 O   0  0  0  0  0  0  0  0  0  0  0  0
    0.7145   -5.3625    0.0000 C   0  0  0  0  0  0  0  0  0  0  0  0
   -0.0000   -4.9500    0.0000 C   0  0  0  0  0  0  0  0  0  0  0  0
   -0.0000   -4.1250    0.0000 C   0  0  0  0  0  0  0  0  0  0  0  0
    0.7145   -3.7125    0.0000 C   0  0  0  0  0  0  0  0  0  0  0  0
    0.7145   -2.8875    0.0000 O   0  0  0  0  0  0  0  0  0  0  0  0
    3.5724   -2.8875    0.0000 N   0  3  0  0  0  0  0  0  0  0  0  0
    3.5724   -3.7125    0.0000 O   0  0  0  0  0  0  0  0  0  0  0  0
    4.2868   -2.4750    0.0000 O   0  5  0  0  0  0  0  0  0  0  0  0
    2.9684    0.4125    0.0000 H   0  0  0  0  0  0  0  0  0  0  0  0
    2.1434    1.2375    0.0000 H   0  0  0  0  0  0  0  0  0  0  0  0
    1.3184    0.4125    0.0000 H   0  0  0  0  0  0  0  0  0  0  0  0
    3.5724   -1.2375    0.0000 H   0  0  0  0  0  0  0  0  0  0  0  0
    0.6165   -2.6183    0.0000 H   0  0  0  0  0  0  0  0  0  0  0  0
    0.7145   -1.2375    0.0000 H   0  0  0  0  0  0  0  0  0  0  0  0
    2.1434   -4.5375    0.0000 H   0  0  0  0  0  0  0  0  0  0  0  0
    1.1018   -6.0909    0.0000 H   0  0  0  0  0  0  0  0  0  0  0  0
    0.3272   -6.0909    0.0000 H   0  0  0  0  0  0  0  0  0  0  0  0
   -0.4372   -5.6496    0.0000 H   0  0  0  0  0  0  0  0  0  0  0  0
   -0.8245   -4.9788    0.0000 H   0  0  0  0  0  0  0  0  0  0  0  0
   -0.8245   -4.0962    0.0000 H   0  0  0  0  0  0  0  0  0  0  0  0
   -0.4372   -3.4254    0.0000 H   0  0  0  0  0  0  0  0  0  0  0  0
  1  2  1  0  0  0  0
  2  3  2  0  0  0  0
  2  4  2  0  0  0  0
  2  5  1  0  0  0  0
  5  6  4  0  0  0  0
  6  7  4  0  0  0  0
  7  8  4  0  0  0  0
  8  9  4  0  0  0  0
  9 10  4  0  0  0  0
  5 10  4  0  0  0  0
  8 11  1  0  0  0  0
 11 12  2  0  0  0  0
 11 13  1  0  0  0  0
 13 14  1  0  0  0  0
 14 15  2  0  0  0  0
 14 16  1  0  0  0  0
 16 17  1  0  0  0  0
 17 18  1  0  0  0  0
 18 19  1  0  0  0  0
 13 19  1  0  0  0  0
 19 20  2  0  0  0  0
  7 21  1  0  0  0  0
 21 22  2  0  0  0  0
 21 23  1  0  0  0  0
  1 24  1  0  0  0  0
  1 25  1  0  0  0  0
  1 26  1  0  0  0  0
  6 27  1  0  0  0  0
  9 28  1  0  0  0  0
 10 29  1  0  0  0  0
 13 30  1  0  0  0  0
 16 31  1  0  0  0  0
 16 32  1  0  0  0  0
 17 33  1  0  0  0  0
 17 34  1  0  0  0  0
 18 35  1  0  0  0  0
 18 36  1  0  0  0  0
M  CHG  2  21   1  23  -1
M  END
$$$$
61
  Mrv0541 12152312282D          

 51 53  0  0  0  0            999 V2000
    4.9110   -0.9365    0.0000 C   0  0  0  0  0  0  0  0  0  0  0  0
    4.9110   -1.7615    0.0000 C   0  0  0  0  0  0  0  0  0  0  0  0
    5.6254   -2.1740    0.0000 C   0  0  0  0  0  0  0  0  0  0  0  0
    5.6254   -2.9990    0.0000 C   0  0  0  0  0  0  0  0  0  0  0  0
    6.0379   -3.7134    0.0000 C   0  0  0  0  0  0  0  0  0  0  0  0
    5.2129   -3.7134    0.0000 C   0  0  0  0  0  0  0  0  0  0  0  0
    4.8643   -4.4611    0.0000 C   0  0  0  0  0  0  0  0  0  0  0  0
    4.3911   -3.6415    0.0000 C   0  0  0  0  0  0  0  0  0  0  0  0
    6.7524   -4.1259    0.0000 C   0  0  0  0  0  0  0  0  0  0  0  0
    6.7524   -4.9509    0.0000 O   0  0  0  0  0  0  0  0  0  0  0  0
    7.4669   -3.7134    0.0000 O   0  0  0  0  0  0  0  0  0  0  0  0
    8.1813   -4.1259    0.0000 C   0  0  0  0  0  0  0  0  0  0  0  0
    8.8958   -3.7134    0.0000 C   0  0  0  0  0  0  0  0  0  0  0  0
    8.9820   -2.8930    0.0000 C   0  0  0  0  0  0  0  0  0  0  0  0
    9.7890   -2.7214    0.0000 O   0  0  0  0  0  0  0  0  0  0  0  0
   10.2015   -3.4359    0.0000 C   0  0  0  0  0  0  0  0  0  0  0  0
    9.6495   -4.0490    0.0000 C   0  0  0  0  0  0  0  0  0  0  0  0
   11.0220   -3.5221    0.0000 C   0  0  0  0  0  0  0  0  0  0  0  0
   11.3576   -4.2758    0.0000 C   0  0  0  0  0  0  0  0  0  0  0  0
   12.1780   -4.3621    0.0000 C   0  0  0  0  0  0  0  0  0  0  0  0
   12.5136   -5.1157    0.0000 C   0  0  0  0  0  0  0  0  0  0  0  0
   12.0287   -5.7832    0.0000 C   0  0  0  0  0  0  0  0  0  0  0  0
   11.2082   -5.6969    0.0000 C   0  0  0  0  0  0  0  0  0  0  0  0
   10.8726   -4.9433    0.0000 C   0  0  0  0  0  0  0  0  0  0  0  0
    4.1965   -2.1740    0.0000 C   0  0  0  0  0  0  0  0  0  0  0  0
    5.7360   -0.9365    0.0000 H   0  0  0  0  0  0  0  0  0  0  0  0
    4.9110   -0.1115    0.0000 H   0  0  0  0  0  0  0  0  0  0  0  0
    4.0860   -0.9365    0.0000 H   0  0  0  0  0  0  0  0  0  0  0  0
    6.3399   -1.7615    0.0000 H   0  0  0  0  0  0  0  0  0  0  0  0
    6.4223   -2.7854    0.0000 H   0  0  0  0  0  0  0  0  0  0  0  0
    6.6213   -3.1301    0.0000 H   0  0  0  0  0  0  0  0  0  0  0  0
    4.1166   -4.1125    0.0000 H   0  0  0  0  0  0  0  0  0  0  0  0
    4.5156   -5.2089    0.0000 H   0  0  0  0  0  0  0  0  0  0  0  0
    5.6120   -4.8098    0.0000 H   0  0  0  0  0  0  0  0  0  0  0  0
    4.1775   -2.8447    0.0000 H   0  0  0  0  0  0  0  0  0  0  0  0
    3.5692   -3.5696    0.0000 H   0  0  0  0  0  0  0  0  0  0  0  0
    4.3192   -4.4634    0.0000 H   0  0  0  0  0  0  0  0  0  0  0  0
    7.7940   -4.8544    0.0000 H   0  0  0  0  0  0  0  0  0  0  0  0
    8.5687   -4.8544    0.0000 H   0  0  0  0  0  0  0  0  0  0  0  0
    8.3690   -2.3409    0.0000 H   0  0  0  0  0  0  0  0  0  0  0  0
    9.2622   -4.7774    0.0000 H   0  0  0  0  0  0  0  0  0  0  0  0
   11.1368   -2.7052    0.0000 H   0  0  0  0  0  0  0  0  0  0  0  0
   11.7635   -3.1605    0.0000 H   0  0  0  0  0  0  0  0  0  0  0  0
   12.6630   -3.6946    0.0000 H   0  0  0  0  0  0  0  0  0  0  0  0
   13.3341   -5.2020    0.0000 H   0  0  0  0  0  0  0  0  0  0  0  0
   12.3642   -6.5368    0.0000 H   0  0  0  0  0  0  0  0  0  0  0  0
   10.7233   -6.3644    0.0000 H   0  0  0  0  0  0  0  0  0  0  0  0
   10.0721   -5.1428    0.0000 H   0  0  0  0  0  0  0  0  0  0  0  0
    3.7840   -1.4595    0.0000 H   0  0  0  0  0  0  0  0  0  0  0  0
    3.4820   -2.5865    0.0000 H   0  0  0  0  0  0  0  0  0  0  0  0
    4.8285   -2.7043    0.0000 H   0  0  0  0  0  0  0  0  0  0  0  0
  1  2  1  0  0  0  0
  2  3  2  0  0  0  0
  3  4  1  0  0  0  0
  4  5  1  0  0  0  0
  5  6  1  0  0  0  0
  4  6  1  0  0  0  0
  6  7  1  0  0  0  0
  6  8  1  0  0  0  0
  5  9  1  0  0  0  0
  9 10  2  0  0  0  0
  9 11  1  0  0  0  0
 11 12  1  0  0  0  0
 12 13  1  0  0  0  0
 13 14  4  0  0  0  0
 14 15  4  0  0  0  0
 15 16  4  0  0  0  0
 16 17  4  0  0  0  0
 13 17  4  0  0  0  0
 16 18  1  0  0  0  0
 18 19  1  0  0  0  0
 19 20  4  0  0  0  0
 20 21  4  0  0  0  0
 21 22  4  0  0  0  0
 22 23  4  0  0  0  0
 23 24  4  0  0  0  0
 19 24  4  0  0  0  0
  2 25  1  0  0  0  0
  1 26  1  0  0  0  0
  1 27  1  0  0  0  0
  1 28  1  0  0  0  0
  3 29  1  0  0  0  0
  4 30  1  0  0  0  0
  5 31  1  0  0  0  0
  7 32  1  0  0  0  0
  7 33  1  0  0  0  0
  7 34  1  0  0  0  0
  8 35  1  0  0  0  0
  8 36  1  0  0  0  0
  8 37  1  0  0  0  0
 12 38  1  0  0  0  0
 12 39  1  0  0  0  0
 14 40  1  0  0  0  0
 17 41  1  0  0  0  0
 18 42  1  0  0  0  0
 18 43  1  0  0  0  0
 20 44  1  0  0  0  0
 21 45  1  0  0  0  0
 22 46  1  0  0  0  0
 23 47  1  0  0  0  0
 24 48  1  0  0  0  0
 25 49  1  0  0  0  0
 25 50  1  0  0  0  0
 25 51  1  0  0  0  0
M  END
$$$$
62
  Mrv0541 12152312282D          

 30 31  0  0  0  0            999 V2000
   -1.4289   -1.6500    0.0000 C   0  0  0  0  0  0  0  0  0  0  0  0
   -0.7145   -1.2375    0.0000 C   0  0  0  0  0  0  0  0  0  0  0  0
    0.0000   -1.6500    0.0000 C   0  0  0  0  0  0  0  0  0  0  0  0
    0.0000   -2.4750    0.0000 C   0  0  0  0  0  0  0  0  0  0  0  0
   -0.7145   -2.8875    0.0000 C   0  0  0  0  0  0  0  0  0  0  0  0
   -1.4289   -2.4750    0.0000 C   0  0  0  0  0  0  0  0  0  0  0  0
    0.7145   -2.8875    0.0000 O   0  0  0  0  0  0  0  0  0  0  0  0
    1.4289   -2.4750    0.0000 C   0  0  0  0  0  0  0  0  0  0  0  0
    2.1434   -2.8875    0.0000 C   0  0  0  0  0  0  0  0  0  0  0  0
    2.8579   -2.4750    0.0000 O   0  0  0  0  0  0  0  0  0  0  0  0
    3.5724   -2.8875    0.0000 C   0  0  0  0  0  0  0  0  0  0  0  0
    4.2868   -2.4750    0.0000 C   0  0  0  0  0  0  0  0  0  0  0  0
    5.0013   -2.8875    0.0000 C   0  0  0  0  0  0  0  0  0  0  0  0
    5.0013   -3.7125    0.0000 C   0  0  0  0  0  0  0  0  0  0  0  0
    4.2868   -4.1250    0.0000 C   0  0  0  0  0  0  0  0  0  0  0  0
    3.5724   -3.7125    0.0000 C   0  0  0  0  0  0  0  0  0  0  0  0
   -2.1434   -1.2375    0.0000 H   0  0  0  0  0  0  0  0  0  0  0  0
   -0.7145   -0.4125    0.0000 H   0  0  0  0  0  0  0  0  0  0  0  0
    0.7145   -1.2375    0.0000 H   0  0  0  0  0  0  0  0  0  0  0  0
   -0.7145   -3.7125    0.0000 H   0  0  0  0  0  0  0  0  0  0  0  0
   -2.1434   -2.8875    0.0000 H   0  0  0  0  0  0  0  0  0  0  0  0
    1.0416   -1.7466    0.0000 H   0  0  0  0  0  0  0  0  0  0  0  0
    1.8163   -1.7466    0.0000 H   0  0  0  0  0  0  0  0  0  0  0  0
    1.7561   -3.6159    0.0000 H   0  0  0  0  0  0  0  0  0  0  0  0
    2.5307   -3.6159    0.0000 H   0  0  0  0  0  0  0  0  0  0  0  0
    4.2868   -1.6500    0.0000 H   0  0  0  0  0  0  0  0  0  0  0  0
    5.7158   -2.4750    0.0000 H   0  0  0  0  0  0  0  0  0  0  0  0
    5.7158   -4.1250    0.0000 H   0  0  0  0  0  0  0  0  0  0  0  0
    4.2868   -4.9500    0.0000 H   0  0  0  0  0  0  0  0  0  0  0  0
    2.8579   -4.1250    0.0000 H   0  0  0  0  0  0  0  0  0  0  0  0
  1  2  4  0  0  0  0
  2  3  4  0  0  0  0
  3  4  4  0  0  0  0
  4  5  4  0  0  0  0
  5  6  4  0  0  0  0
  1  6  4  0  0  0  0
  4  7  1  0  0  0  0
  7  8  1  0  0  0  0
  8  9  1  0  0  0  0
  9 10  1  0  0  0  0
 10 11  1  0  0  0  0
 11 12  4  0  0  0  0
 12 13  4  0  0  0  0
 13 14  4  0  0  0  0
 14 15  4  0  0  0  0
 15 16  4  0  0  0  0
 11 16  4  0  0  0  0
  1 17  1  0  0  0  0
  2 18  1  0  0  0  0
  3 19  1  0  0  0  0
  5 20  1  0  0  0  0
  6 21  1  0  0  0  0
  8 22  1  0  0  0  0
  8 23  1  0  0  0  0
  9 24  1  0  0  0  0
  9 25  1  0  0  0  0
 12 26  1  0  0  0  0
 13 27  1  0  0  0  0
 14 28  1  0  0  0  0
 15 29  1  0  0  0  0
 16 30  1  0  0  0  0
M  END
$$$$
63
  Mrv0541 12152312282D          

 33 33  0  0  0  0            999 V2000
   -0.9836   -3.8350    0.0000 C   0  0  0  0  0  0  0  0  0  0  0  0
   -0.2691   -3.4225    0.0000 C   0  0  0  0  0  0  0  0  0  0  0  0
    0.4454   -3.8350    0.0000 C   0  0  0  0  0  0  0  0  0  0  0  0
    1.1598   -3.4225    0.0000 C   0  0  0  0  0  0  0  0  0  0  0  0
    1.8743   -3.8350    0.0000 C   0  0  0  0  0  0  0  0  0  0  0  0
    2.5888   -3.4225    0.0000 C   0  0  0  0  0  0  0  0  0  0  0  0
    3.3033   -3.8350    0.0000 C   0  0  0  0  0  0  0  0  0  0  0  0
    4.0177   -3.4225    0.0000 C   0  0  0  0  0  0  0  0  0  0  0  0
    4.1040   -2.6020    0.0000 C   0  0  0  0  0  0  0  0  0  0  0  0
    4.9109   -2.4305    0.0000 C   0  0  0  0  0  0  0  0  0  0  0  0
    5.3234   -3.1450    0.0000 C   0  0  0  0  0  0  0  0  0  0  0  0
    6.1439   -3.2312    0.0000 O   0  0  0  0  0  0  0  0  0  0  0  0
    4.7714   -3.7581    0.0000 O   0  0  0  0  0  0  0  0  0  0  0  0
   -1.3961   -3.1205    0.0000 H   0  0  0  0  0  0  0  0  0  0  0  0
   -1.6980   -4.2475    0.0000 H   0  0  0  0  0  0  0  0  0  0  0  0
   -0.5711   -4.5495    0.0000 H   0  0  0  0  0  0  0  0  0  0  0  0
   -0.6564   -2.6941    0.0000 H   0  0  0  0  0  0  0  0  0  0  0  0
    0.1182   -2.6941    0.0000 H   0  0  0  0  0  0  0  0  0  0  0  0
    0.0581   -4.5634    0.0000 H   0  0  0  0  0  0  0  0  0  0  0  0
    0.8327   -4.5634    0.0000 H   0  0  0  0  0  0  0  0  0  0  0  0
    0.7725   -2.6941    0.0000 H   0  0  0  0  0  0  0  0  0  0  0  0
    1.5472   -2.6941    0.0000 H   0  0  0  0  0  0  0  0  0  0  0  0
    1.4870   -4.5634    0.0000 H   0  0  0  0  0  0  0  0  0  0  0  0
    2.2616   -4.5634    0.0000 H   0  0  0  0  0  0  0  0  0  0  0  0
    2.2015   -2.6941    0.0000 H   0  0  0  0  0  0  0  0  0  0  0  0
    2.9761   -2.6941    0.0000 H   0  0  0  0  0  0  0  0  0  0  0  0
    2.9159   -4.5634    0.0000 H   0  0  0  0  0  0  0  0  0  0  0  0
    3.6906   -4.5634    0.0000 H   0  0  0  0  0  0  0  0  0  0  0  0
    3.3258   -2.9732    0.0000 H   0  0  0  0  0  0  0  0  0  0  0  0
    3.2988   -2.4220    0.0000 H   0  0  0  0  0  0  0  0  0  0  0  0
    3.8408   -1.8201    0.0000 H   0  0  0  0  0  0  0  0  0  0  0  0
    4.8333   -1.6091    0.0000 H   0  0  0  0  0  0  0  0  0  0  0  0
    5.5733   -1.9386    0.0000 H   0  0  0  0  0  0  0  0  0  0  0  0
  1  2  1  0  0  0  0
  2  3  1  0  0  0  0
  3  4  1  0  0  0  0
  4  5  1  0  0  0  0
  5  6  1  0  0  0  0
  6  7  1  0  0  0  0
  7  8  1  0  0  0  0
  8  9  1  0  0  0  0
  9 10  1  0  0  0  0
 10 11  1  0  0  0  0
 11 12  2  0  0  0  0
 11 13  1  0  0  0  0
  8 13  1  0  0  0  0
  1 14  1  0  0  0  0
  1 15  1  0  0  0  0
  1 16  1  0  0  0  0
  2 17  1  0  0  0  0
  2 18  1  0  0  0  0
  3 19  1  0  0  0  0
  3 20  1  0  0  0  0
  4 21  1  0  0  0  0
  4 22  1  0  0  0  0
  5 23  1  0  0  0  0
  5 24  1  0  0  0  0
  6 25  1  0  0  0  0
  6 26  1  0  0  0  0
  7 27  1  0  0  0  0
  7 28  1  0  0  0  0
  8 29  1  0  0  0  0
  9 30  1  0  0  0  0
  9 31  1  0  0  0  0
 10 32  1  0  0  0  0
 10 33  1  0  0  0  0
M  END
$$$$
64
  Mrv0541 12152312282D          

 44 46  0  0  1  0            999 V2000
   -1.9344   -5.0777    0.0000 C   0  0  0  0  0  0  0  0  0  0  0  0
   -1.3213   -5.6297    0.0000 N   0  0  0  0  0  0  0  0  0  0  0  0
   -0.5143   -5.4582    0.0000 C   0  0  0  0  0  0  0  0  0  0  0  0
   -0.1018   -6.1727    0.0000 C   0  0  0  0  0  0  0  0  0  0  0  0
   -0.6538   -6.7857    0.0000 C   0  0  0  0  0  0  0  0  0  0  0  0
   -1.4075   -6.4502    0.0000 N   0  0  0  0  0  0  0  0  0  0  0  0
    0.7187   -6.2589    0.0000 Cl  0  0  0  0  0  0  0  0  0  0  0  0
   -0.1787   -4.7045    0.0000 C   0  0  0  0  0  0  0  0  0  0  0  0
   -0.5912   -3.9900    0.0000 C   0  0  0  0  0  0  0  0  0  0  0  0
   -0.0392   -3.3769    0.0000 S   0  0  0  0  0  0  0  0  0  0  0  0
    0.7145   -3.7125    0.0000 C   0  0  0  0  0  0  0  0  0  0  0  0
    0.6282   -4.5330    0.0000 C   0  0  0  0  0  0  0  0  0  0  0  0
    1.4289   -3.3000    0.0000 C   0  0  0  0  0  0  0  0  0  0  0  0
    2.1434   -3.7125    0.0000 O   0  0  0  0  0  0  0  0  0  0  0  0
    1.4289   -2.4750    0.0000 N   0  0  0  0  0  0  0  0  0  0  0  0
    2.1434   -2.0625    0.0000 C   0  0  1  0  0  0  0  0  0  0  0  0
    2.1434   -1.2375    0.0000 C   0  0  0  0  0  0  0  0  0  0  0  0
    2.8579   -0.8250    0.0000 C   0  0  0  0  0  0  0  0  0  0  0  0
    2.8579    0.0000    0.0000 C   0  0  0  0  0  0  0  0  0  0  0  0
    3.5724    0.4125    0.0000 C   0  0  0  0  0  0  0  0  0  0  0  0
    4.2868    0.0000    0.0000 C   0  0  0  0  0  0  0  0  0  0  0  0
    4.2868   -0.8250    0.0000 C   0  0  0  0  0  0  0  0  0  0  0  0
    3.5724   -1.2375    0.0000 C   0  0  0  0  0  0  0  0  0  0  0  0
    3.5724    1.2375    0.0000 F   0  0  0  0  0  0  0  0  0  0  0  0
    2.8579   -2.4750    0.0000 C   0  0  0  0  0  0  0  0  0  0  0  0
    2.8579   -3.3000    0.0000 N   0  0  0  0  0  0  0  0  0  0  0  0
   -1.4117   -3.9038    0.0000 Cl  0  0  0  0  0  0  0  0  0  0  0  0
   -1.3823   -4.4646    0.0000 H   0  0  0  0  0  0  0  0  0  0  0  0
   -2.5475   -4.5256    0.0000 H   0  0  0  0  0  0  0  0  0  0  0  0
   -2.4864   -5.6908    0.0000 H   0  0  0  0  0  0  0  0  0  0  0  0
   -0.4823   -7.5927    0.0000 H   0  0  0  0  0  0  0  0  0  0  0  0
    1.2413   -5.0850    0.0000 H   0  0  0  0  0  0  0  0  0  0  0  0
    0.7145   -2.0625    0.0000 H   0  0  0  0  0  0  0  0  0  0  0  0
    1.4289   -1.6500    0.0000 H   0  0  0  0  0  0  0  0  0  0  0  0
    1.3189   -1.2087    0.0000 H   0  0  0  0  0  0  0  0  0  0  0  0
    1.7062   -0.5379    0.0000 H   0  0  0  0  0  0  0  0  0  0  0  0
    2.1434    0.4125    0.0000 H   0  0  0  0  0  0  0  0  0  0  0  0
    5.0013    0.4125    0.0000 H   0  0  0  0  0  0  0  0  0  0  0  0
    5.0013   -1.2375    0.0000 H   0  0  0  0  0  0  0  0  0  0  0  0
    3.5724   -2.0625    0.0000 H   0  0  0  0  0  0  0  0  0  0  0  0
    3.2951   -1.7754    0.0000 H   0  0  0  0  0  0  0  0  0  0  0  0
    3.6824   -2.4462    0.0000 H   0  0  0  0  0  0  0  0  0  0  0  0
    2.3276   -3.9320    0.0000 H   0  0  0  0  0  0  0  0  0  0  0  0
    3.5724   -3.7125    0.0000 H   0  0  0  0  0  0  0  0  0  0  0  0
  1  2  1  0  0  0  0
  2  3  4  0  0  0  0
  3  4  4  0  0  0  0
  4  5  4  0  0  0  0
  5  6  4  0  0  0  0
  2  6  4  0  0  0  0
  4  7  1  0  0  0  0
  3  8  1  0  0  0  0
  8  9  4  0  0  0  0
  9 10  4  0  0  0  0
 10 11  4  0  0  0  0
 11 12  4  0  0  0  0
  8 12  4  0  0  0  0
 11 13  1  0  0  0  0
 13 14  2  0  0  0  0
 13 15  1  0  0  0  0
 16 15  1  1  0  0  0
 16 17  1  0  0  0  0
 17 18  1  0  0  0  0
 18 19  4  0  0  0  0
 19 20  4  0  0  0  0
 20 21  4  0  0  0  0
 21 22  4  0  0  0  0
 22 23  4  0  0  0  0
 18 23  4  0  0  0  0
 20 24  1  0  0  0  0
 16 25  1  0  0  0  0
 25 26  1  0  0  0  0
  9 27  1  0  0  0  0
  1 28  1  0  0  0  0
  1 29  1  0  0  0  0
  1 30  1  0  0  0  0
  5 31  1  0  0  0  0
 12 32  1  0  0  0  0
 15 33  1  0  0  0  0
 16 34  1  6  0  0  0
 17 35  1  0  0  0  0
 17 36  1  0  0  0  0
 19 37  1  0  0  0  0
 21 38  1  0  0  0  0
 22 39  1  0  0  0  0
 23 40  1  0  0  0  0
 25 41  1  0  0  0  0
 25 42  1  0  0  0  0
 26 43  1  0  0  0  0
 26 44  1  0  0  0  0
M  END
$$$$
65
  Mrv0541 12152312282D          

126129  0  0  1  0            999 V2000
    8.6867    4.8014    0.0000 C   0  0  0  0  0  0  0  0  0  0  0  0
    7.9657    4.4005    0.0000 C   0  0  2  0  0  0  0  0  0  0  0  0
    7.9708    3.4977    0.0000 C   0  0  0  0  0  0  0  0  0  0  0  0
    8.4993    2.8642    0.0000 C   0  0  1  0  0  0  0  0  0  0  0  0
    8.0601    2.1658    0.0000 C   0  0  2  0  0  0  0  0  0  0  0  0
    8.1537    1.3461    0.0000 C   0  0  2  0  0  0  0  0  0  0  0  0
    7.4907    0.8552    0.0000 C   0  0  0  0  0  0  0  0  0  0  0  0
    6.7340    1.1840    0.0000 C   0  0  2  0  0  0  0  0  0  0  0  0
    6.4443    1.9812    0.0000 C   0  0  1  0  0  0  0  0  0  0  0  0
    7.2602    2.3677    0.0000 O   0  0  0  0  0  0  0  0  0  0  0  0
    5.7459    2.4204    0.0000 C   0  0  0  0  0  0  0  0  0  0  0  0
    5.7771    3.2448    0.0000 O   0  0  0  0  0  0  0  0  0  0  0  0
    4.7597    1.7972    0.0000 C   0  0  0  0  0  0  0  0  0  0  0  0
    4.7285    0.9728    0.0000 O   0  0  0  0  0  0  0  0  0  0  0  0
    4.3180    2.4744    0.0000 N   0  0  0  0  0  0  0  0  0  0  0  0
    5.0164    2.0352    0.0000 C   0  0  0  0  0  0  0  0  0  0  0  0
    4.9852    1.2108    0.0000 C   0  0  0  0  0  0  0  0  0  0  0  0
    4.2557    0.8256    0.0000 C   0  0  0  0  0  0  0  0  0  0  0  0
    3.5573    1.2648    0.0000 C   0  0  0  0  0  0  0  0  0  0  0  0
    3.5885    2.0892    0.0000 C   0  0  1  0  0  0  0  0  0  0  0  0
    2.8901    2.5284    0.0000 C   0  0  0  0  0  0  0  0  0  0  0  0
    2.1605    2.1432    0.0000 O   0  0  0  0  0  0  0  0  0  0  0  0
    2.9212    3.3528    0.0000 O   0  0  0  0  0  0  0  0  0  0  0  0
    2.2229    3.7920    0.0000 C   0  0  1  0  0  0  0  0  0  0  0  0
    2.2540    4.6164    0.0000 C   0  0  1  0  0  0  0  0  0  0  0  0
    2.9836    5.0016    0.0000 C   0  0  2  0  0  0  0  0  0  0  0  0
    3.6820    4.5624    0.0000 C   0  0  0  0  0  0  0  0  0  0  0  0
    4.4115    4.9476    0.0000 C   0  0  0  0  0  0  0  0  0  0  0  0
    4.4427    5.7721    0.0000 O   0  0  0  0  0  0  0  0  0  0  0  0
    5.1099    4.5084    0.0000 C   0  0  1  0  0  0  0  0  0  0  0  0
    5.8394    4.8937    0.0000 C   0  0  0  0  0  0  0  0  0  0  0  0
    6.5378    4.4545    0.0000 C   0  0  0  0  0  0  0  0  0  0  0  0
    7.2674    4.8397    0.0000 C   0  0  0  0  0  0  0  0  0  0  0  0
    6.5066    3.6300    0.0000 C   0  0  0  0  0  0  0  0  0  0  0  0
    5.1411    5.3329    0.0000 C   0  0  0  0  0  0  0  0  0  0  0  0
    5.8706    5.7181    0.0000 C   0  0  0  0  0  0  0  0  0  0  0  0
    6.5690    5.2789    0.0000 C   0  0  0  0  0  0  0  0  0  0  0  0
    3.0148    5.8260    0.0000 O   0  0  0  0  0  0  0  0  0  0  0  0
    1.5557    5.0556    0.0000 C   0  0  0  0  0  0  0  0  0  0  0  0
    1.4933    3.4068    0.0000 C   0  0  0  0  0  0  0  0  0  0  0  0
    1.4622    2.5824    0.0000 C   0  0  0  0  0  0  0  0  0  0  0  0
    0.7326    2.1972    0.0000 C   0  0  2  0  0  0  0  0  0  0  0  0
    0.7014    1.3728    0.0000 C   0  0  0  0  0  0  0  0  0  0  0  0
   -0.0281    0.9876    0.0000 C   0  0  0  0  0  0  0  0  0  0  0  0
   -0.7265    1.4268    0.0000 C   0  0  2  0  0  0  0  0  0  0  0  0
   -0.6953    2.2512    0.0000 C   0  0  1  0  0  0  0  0  0  0  0  0
    0.0342    2.6364    0.0000 C   0  0  0  0  0  0  0  0  0  0  0  0
   -1.3937    2.6904    0.0000 O   0  0  0  0  0  0  0  0  0  0  0  0
   -2.1232    2.3052    0.0000 C   0  0  0  0  0  0  0  0  0  0  0  0
   -1.4560    1.0415    0.0000 O   0  0  0  0  0  0  0  0  0  0  0  0
    0.7949    3.8460    0.0000 C   0  0  0  0  0  0  0  0  0  0  0  0
    5.8023    1.4631    0.0000 O   0  0  0  0  0  0  0  0  0  0  0  0
    6.1331    0.6187    0.0000 C   0  0  0  0  0  0  0  0  0  0  0  0
    8.9104    1.0174    0.0000 O   0  0  0  0  0  0  0  0  0  0  0  0
    9.0040    0.1977    0.0000 C   0  0  0  0  0  0  0  0  0  0  0  0
    9.3225    2.9194    0.0000 O   0  0  0  0  0  0  0  0  0  0  0  0
    9.6862    3.6598    0.0000 C   0  0  0  0  0  0  0  0  0  0  0  0
    9.0877    4.0804    0.0000 H   0  0  0  0  0  0  0  0  0  0  0  0
    9.4078    5.2024    0.0000 H   0  0  0  0  0  0  0  0  0  0  0  0
    8.2858    5.5224    0.0000 H   0  0  0  0  0  0  0  0  0  0  0  0
    8.7774    4.2530    0.0000 H   0  0  0  0  0  0  0  0  0  0  0  0
    7.1720    3.2915    0.0000 H   0  0  0  0  0  0  0  0  0  0  0  0
    7.3945    2.9073    0.0000 H   0  0  0  0  0  0  0  0  0  0  0  0
    8.5448    3.6879    0.0000 H   0  0  0  0  0  0  0  0  0  0  0  0
    8.8786    2.2688    0.0000 H   0  0  0  0  0  0  0  0  0  0  0  0
    8.9447    1.5807    0.0000 H   0  0  0  0  0  0  0  0  0  0  0  0
    8.1625    0.3763    0.0000 H   0  0  0  0  0  0  0  0  0  0  0  0
    7.1886    0.0875    0.0000 H   0  0  0  0  0  0  0  0  0  0  0  0
    6.8756    0.3712    0.0000 H   0  0  0  0  0  0  0  0  0  0  0  0
    5.4797    2.7178    0.0000 H   0  0  0  0  0  0  0  0  0  0  0  0
    5.8414    2.0328    0.0000 H   0  0  0  0  0  0  0  0  0  0  0  0
    5.5770    0.6360    0.0000 H   0  0  0  0  0  0  0  0  0  0  0  0
    5.3956    0.4951    0.0000 H   0  0  0  0  0  0  0  0  0  0  0  0
    4.6152    0.0830    0.0000 H   0  0  0  0  0  0  0  0  0  0  0  0
    3.8411    0.1123    0.0000 H   0  0  0  0  0  0  0  0  0  0  0  0
    3.0940    0.5822    0.0000 H   0  0  0  0  0  0  0  0  0  0  0  0
    2.7323    1.2672    0.0000 H   0  0  0  0  0  0  0  0  0  0  0  0
    2.8589    1.7040    0.0000 H   0  0  0  0  0  0  0  0  0  0  0  0
    2.1917    2.9676    0.0000 H   0  0  0  0  0  0  0  0  0  0  0  0
    1.7002    4.0049    0.0000 H   0  0  0  0  0  0  0  0  0  0  0  0
    2.2852    5.4408    0.0000 H   0  0  0  0  0  0  0  0  0  0  0  0
    3.2674    3.8492    0.0000 H   0  0  0  0  0  0  0  0  0  0  0  0
    4.0415    3.8199    0.0000 H   0  0  0  0  0  0  0  0  0  0  0  0
    4.7247    5.2380    0.0000 H   0  0  0  0  0  0  0  0  0  0  0  0
    6.1507    5.6577    0.0000 H   0  0  0  0  0  0  0  0  0  0  0  0
    6.9078    5.5822    0.0000 H   0  0  0  0  0  0  0  0  0  0  0  0
    7.6819    5.5529    0.0000 H   0  0  0  0  0  0  0  0  0  0  0  0
    5.6822    3.6612    0.0000 H   0  0  0  0  0  0  0  0  0  0  0  0
    6.4755    2.8056    0.0000 H   0  0  0  0  0  0  0  0  0  0  0  0
    7.2920    3.8827    0.0000 H   0  0  0  0  0  0  0  0  0  0  0  0
    4.3182    5.3928    0.0000 H   0  0  0  0  0  0  0  0  0  0  0  0
    4.7306    6.0485    0.0000 H   0  0  0  0  0  0  0  0  0  0  0  0
    5.9018    6.5425    0.0000 H   0  0  0  0  0  0  0  0  0  0  0  0
    6.8217    4.4935    0.0000 H   0  0  0  0  0  0  0  0  0  0  0  0
    7.2985    5.6641    0.0000 H   0  0  0  0  0  0  0  0  0  0  0  0
    3.7443    6.2113    0.0000 H   0  0  0  0  0  0  0  0  0  0  0  0
    1.9949    5.7540    0.0000 H   0  0  0  0  0  0  0  0  0  0  0  0
    0.8573    5.4948    0.0000 H   0  0  0  0  0  0  0  0  0  0  0  0
    1.1165    4.3572    0.0000 H   0  0  0  0  0  0  0  0  0  0  0  0
    1.9682    1.9308    0.0000 H   0  0  0  0  0  0  0  0  0  0  0  0
    1.4310    1.7580    0.0000 H   0  0  0  0  0  0  0  0  0  0  0  0
    1.5243    1.3128    0.0000 H   0  0  0  0  0  0  0  0  0  0  0  0
    1.1119    0.6571    0.0000 H   0  0  0  0  0  0  0  0  0  0  0  0
    0.3314    0.2450    0.0000 H   0  0  0  0  0  0  0  0  0  0  0  0
   -0.4427    0.2743    0.0000 H   0  0  0  0  0  0  0  0  0  0  0  0
   -0.7577    0.6023    0.0000 H   0  0  0  0  0  0  0  0  0  0  0  0
   -1.4249    1.8660    0.0000 H   0  0  0  0  0  0  0  0  0  0  0  0
   -0.3253    3.3789    0.0000 H   0  0  0  0  0  0  0  0  0  0  0  0
    0.1798    3.4484    0.0000 H   0  0  0  0  0  0  0  0  0  0  0  0
   -2.5084    3.0347    0.0000 H   0  0  0  0  0  0  0  0  0  0  0  0
   -2.8528    1.9199    0.0000 H   0  0  0  0  0  0  0  0  0  0  0  0
   -1.7380    1.5756    0.0000 H   0  0  0  0  0  0  0  0  0  0  0  0
   -2.1544    1.4807    0.0000 H   0  0  0  0  0  0  0  0  0  0  0  0
    0.9688    4.6525    0.0000 H   0  0  0  0  0  0  0  0  0  0  0  0
    0.0966    4.2852    0.0000 H   0  0  0  0  0  0  0  0  0  0  0  0
    0.6211    3.0395    0.0000 H   0  0  0  0  0  0  0  0  0  0  0  0
    5.0326    1.7601    0.0000 H   0  0  0  0  0  0  0  0  0  0  0  0
    5.3964    0.9901    0.0000 H   0  0  0  0  0  0  0  0  0  0  0  0
    5.5321    0.0535    0.0000 H   0  0  0  0  0  0  0  0  0  0  0  0
    6.6983    0.0178    0.0000 H   0  0  0  0  0  0  0  0  0  0  0  0
    8.2658   -0.1706    0.0000 H   0  0  0  0  0  0  0  0  0  0  0  0
    9.0977   -0.6220    0.0000 H   0  0  0  0  0  0  0  0  0  0  0  0
    9.8237    0.2913    0.0000 H   0  0  0  0  0  0  0  0  0  0  0  0
   10.4267    3.2960    0.0000 H   0  0  0  0  0  0  0  0  0  0  0  0
   10.0500    4.4003    0.0000 H   0  0  0  0  0  0  0  0  0  0  0  0
    8.8852    3.4625    0.0000 H   0  0  0  0  0  0  0  0  0  0  0  0
  2  1  1  6  0  0  0
  2  3  1  0  0  0  0
  3  4  1  0  0  0  0
  4  5  1  0  0  0  0
  5  6  1  0  0  0  0
  6  7  1  0  0  0  0
  7  8  1  0  0  0  0
  8  9  1  0  0  0  0
  9 10  1  0  0  0  0
  5 10  1  0  0  0  0
  9 11  1  0  0  0  0
 11 12  2  0  0  0  0
 11 13  1  0  0  0  0
 13 14  2  0  0  0  0
 13 15  1  0  0  0  0
 15 16  1  0  0  0  0
 16 17  1  0  0  0  0
 17 18  1  0  0  0  0
 18 19  1  0  0  0  0
 19 20  1  0  0  0  0
 15 20  1  0  0  0  0
 20 21  1  0  0  0  0
 21 22  2  0  0  0  0
 21 23  1  0  0  0  0
 23 24  1  0  0  0  0
 24 25  1  0  0  0  0
 25 26  1  0  0  0  0
 26 27  1  0  0  0  0
 27 28  1  0  0  0  0
 28 29  2  0  0  0  0
 28 30  1  0  0  0  0
 30 31  1  0  0  0  0
 31 32  2  0  0  0  0
 32 33  1  0  0  0  0
  2 33  1  0  0  0  0
 32 34  1  0  0  0  0
 30 35  1  6  0  0  0
 35 36  1  0  0  0  0
 36 37  2  0  0  0  0
 26 38  1  1  0  0  0
 25 39  1  6  0  0  0
 24 40  1  6  0  0  0
 40 41  2  0  0  0  0
 42 41  1  6  0  0  0
 42 43  1  0  0  0  0
 43 44  1  0  0  0  0
 44 45  1  0  0  0  0
 45 46  1  0  0  0  0
 46 47  1  0  0  0  0
 42 47  1  0  0  0  0
 46 48  1  6  0  0  0
 48 49  1  0  0  0  0
 45 50  1  1  0  0  0
 40 51  1  0  0  0  0
  9 52  1  1  0  0  0
  8 53  1  1  0  0  0
  6 54  1  1  0  0  0
 54 55  1  0  0  0  0
  4 56  1  6  0  0  0
 56 57  1  0  0  0  0
  1 58  1  0  0  0  0
  1 59  1  0  0  0  0
  1 60  1  0  0  0  0
  2 61  1  1  0  0  0
  3 62  1  0  0  0  0
  3 63  1  0  0  0  0
  4 64  1  1  0  0  0
  5 65  1  1  0  0  0
  6 66  1  6  0  0  0
  7 67  1  0  0  0  0
  7 68  1  0  0  0  0
  8 69  1  6  0  0  0
 16 70  1  0  0  0  0
 16 71  1  0  0  0  0
 17 72  1  0  0  0  0
 17 73  1  0  0  0  0
 18 74  1  0  0  0  0
 18 75  1  0  0  0  0
 19 76  1  0  0  0  0
 19 77  1  0  0  0  0
 20 78  1  6  0  0  0
 24 79  1  1  0  0  0
 25 80  1  1  0  0  0
 26 81  1  6  0  0  0
 27 82  1  0  0  0  0
 27 83  1  0  0  0  0
 30 84  1  1  0  0  0
 31 85  1  0  0  0  0
 33 86  1  0  0  0  0
 33 87  1  0  0  0  0
 34 88  1  0  0  0  0
 34 89  1  0  0  0  0
 34 90  1  0  0  0  0
 35 91  1  0  0  0  0
 35 92  1  0  0  0  0
 36 93  1  0  0  0  0
 37 94  1  0  0  0  0
 37 95  1  0  0  0  0
 38 96  1  0  0  0  0
 39 97  1  0  0  0  0
 39 98  1  0  0  0  0
 39 99  1  0  0  0  0
 41100  1  0  0  0  0
 42101  1  1  0  0  0
 43102  1  0  0  0  0
 43103  1  0  0  0  0
 44104  1  0  0  0  0
 44105  1  0  0  0  0
 45106  1  6  0  0  0
 46107  1  1  0  0  0
 47108  1  0  0  0  0
 47109  1  0  0  0  0
 49110  1  0  0  0  0
 49111  1  0  0  0  0
 49112  1  0  0  0  0
 50113  1  0  0  0  0
 51114  1  0  0  0  0
 51115  1  0  0  0  0
 51116  1  0  0  0  0
 52117  1  0  0  0  0
 53118  1  0  0  0  0
 53119  1  0  0  0  0
 53120  1  0  0  0  0
 55121  1  0  0  0  0
 55122  1  0  0  0  0
 55123  1  0  0  0  0
 57124  1  0  0  0  0
 57125  1  0  0  0  0
 57126  1  0  0  0  0
M  END
$$$$
66
  Mrv0541 12152312282D          

125128  0  0  1  0            999 V2000
   13.9318    1.8897    0.0000 C   0  0  0  0  0  0  0  0  0  0  0  0
   14.0733    1.0769    0.0000 C   0  0  0  0  0  0  0  0  0  0  0  0
   13.4402    0.5479    0.0000 C   0  0  2  0  0  0  0  0  0  0  0  0
   13.6143   -0.3379    0.0000 C   0  0  0  0  0  0  0  0  0  0  0  0
   14.2521   -0.8612    0.0000 C   0  0  0  0  0  0  0  0  0  0  0  0
   13.9515   -1.6295    0.0000 C   0  0  0  0  0  0  0  0  0  0  0  0
   13.1280   -1.5810    0.0000 C   0  0  1  0  0  0  0  0  0  0  0  0
   12.3989   -2.1135    0.0000 C   0  0  0  0  0  0  0  0  0  0  0  0
   11.6306   -1.8129    0.0000 C   0  0  1  0  0  0  0  0  0  0  0  0
   10.9862   -2.3280    0.0000 C   0  0  2  0  0  0  0  0  0  0  0  0
   11.1100   -3.1436    0.0000 C   0  0  2  0  0  0  0  0  0  0  0  0
   10.4655   -3.6587    0.0000 C   0  0  0  0  0  0  0  0  0  0  0  0
    9.6972   -3.3581    0.0000 C   0  0  2  0  0  0  0  0  0  0  0  0
    9.5734   -2.5424    0.0000 C   0  0  1  0  0  0  0  0  0  0  0  0
   10.2179   -2.0274    0.0000 O   0  0  0  0  0  0  0  0  0  0  0  0
    8.8051   -2.2418    0.0000 C   0  0  0  0  0  0  0  0  0  0  0  0
    8.1606   -2.7569    0.0000 O   0  0  0  0  0  0  0  0  0  0  0  0
    8.6813   -1.4262    0.0000 C   0  0  0  0  0  0  0  0  0  0  0  0
    9.3258   -0.9111    0.0000 O   0  0  0  0  0  0  0  0  0  0  0  0
    7.9130   -1.1256    0.0000 N   0  0  0  0  0  0  0  0  0  0  0  0
    7.2685   -1.6407    0.0000 C   0  0  0  0  0  0  0  0  0  0  0  0
    6.5002   -1.3401    0.0000 C   0  0  0  0  0  0  0  0  0  0  0  0
    6.3764   -0.5244    0.0000 C   0  0  0  0  0  0  0  0  0  0  0  0
    7.0209   -0.0093    0.0000 C   0  0  0  0  0  0  0  0  0  0  0  0
    7.7892   -0.3099    0.0000 C   0  0  1  0  0  0  0  0  0  0  0  0
    8.4336    0.2051    0.0000 C   0  0  0  0  0  0  0  0  0  0  0  0
    8.3098    1.0208    0.0000 O   0  0  0  0  0  0  0  0  0  0  0  0
    9.2019   -0.0955    0.0000 O   0  0  0  0  0  0  0  0  0  0  0  0
    9.8464    0.4196    0.0000 C   0  0  1  0  0  0  0  0  0  0  0  0
   10.6147    0.1190    0.0000 C   0  0  1  0  0  0  0  0  0  0  0  0
   11.2592    0.6341    0.0000 C   0  0  2  0  0  0  0  0  0  0  0  0
   12.0274    0.3335    0.0000 C   0  0  0  0  0  0  0  0  0  0  0  0
   12.6719    0.8485    0.0000 C   0  0  0  0  0  0  0  0  0  0  0  0
   12.5481    1.6642    0.0000 O   0  0  0  0  0  0  0  0  0  0  0  0
   11.1353    1.4497    0.0000 O   0  0  0  0  0  0  0  0  0  0  0  0
   10.7385   -0.6967    0.0000 C   0  0  0  0  0  0  0  0  0  0  0  0
    9.7226    1.2353    0.0000 C   0  0  0  0  0  0  0  0  0  0  0  0
   10.3670    1.7503    0.0000 C   0  0  0  0  0  0  0  0  0  0  0  0
   10.2432    2.5660    0.0000 C   0  0  2  0  0  0  0  0  0  0  0  0
    9.4749    2.8666    0.0000 C   0  0  0  0  0  0  0  0  0  0  0  0
    9.3511    3.6822    0.0000 C   0  0  0  0  0  0  0  0  0  0  0  0
    9.9956    4.1973    0.0000 C   0  0  2  0  0  0  0  0  0  0  0  0
   10.7639    3.8967    0.0000 C   0  0  1  0  0  0  0  0  0  0  0  0
   10.8877    3.0810    0.0000 C   0  0  0  0  0  0  0  0  0  0  0  0
   11.4083    4.4117    0.0000 O   0  0  0  0  0  0  0  0  0  0  0  0
   11.2845    5.2274    0.0000 C   0  0  0  0  0  0  0  0  0  0  0  0
    9.8717    5.0129    0.0000 O   0  0  0  0  0  0  0  0  0  0  0  0
    8.9543    1.5358    0.0000 C   0  0  0  0  0  0  0  0  0  0  0  0
    8.9289   -3.0575    0.0000 O   0  0  0  0  0  0  0  0  0  0  0  0
    9.0528   -3.8731    0.0000 C   0  0  0  0  0  0  0  0  0  0  0  0
   11.8783   -3.4442    0.0000 O   0  0  0  0  0  0  0  0  0  0  0  0
   12.0021   -4.2599    0.0000 C   0  0  0  0  0  0  0  0  0  0  0  0
   11.7544   -2.6286    0.0000 O   0  0  0  0  0  0  0  0  0  0  0  0
   12.5227   -2.9291    0.0000 C   0  0  0  0  0  0  0  0  0  0  0  0
   12.8952   -0.7895    0.0000 C   0  0  0  0  0  0  0  0  0  0  0  0
   15.0504   -0.6528    0.0000 C   0  0  0  0  0  0  0  0  0  0  0  0
   14.7446    2.0312    0.0000 H   0  0  0  0  0  0  0  0  0  0  0  0
   13.7903    2.7024    0.0000 H   0  0  0  0  0  0  0  0  0  0  0  0
   13.1190    1.7481    0.0000 H   0  0  0  0  0  0  0  0  0  0  0  0
   14.8905    1.1899    0.0000 H   0  0  0  0  0  0  0  0  0  0  0  0
   14.6240    0.4626    0.0000 H   0  0  0  0  0  0  0  0  0  0  0  0
   14.2179    0.2725    0.0000 H   0  0  0  0  0  0  0  0  0  0  0  0
   13.3440   -1.1174    0.0000 H   0  0  0  0  0  0  0  0  0  0  0  0
   14.6802   -2.0164    0.0000 H   0  0  0  0  0  0  0  0  0  0  0  0
   13.9980   -2.4532    0.0000 H   0  0  0  0  0  0  0  0  0  0  0  0
   13.6414   -0.9353    0.0000 H   0  0  0  0  0  0  0  0  0  0  0  0
   12.8733   -2.7885    0.0000 H   0  0  0  0  0  0  0  0  0  0  0  0
   11.5857   -2.2522    0.0000 H   0  0  0  0  0  0  0  0  0  0  0  0
   12.1457   -2.4574    0.0000 H   0  0  0  0  0  0  0  0  0  0  0  0
   11.8109   -2.3477    0.0000 H   0  0  0  0  0  0  0  0  0  0  0  0
   11.9347   -3.1633    0.0000 H   0  0  0  0  0  0  0  0  0  0  0  0
   11.1545   -4.1124    0.0000 H   0  0  0  0  0  0  0  0  0  0  0  0
   10.1919   -4.4370    0.0000 H   0  0  0  0  0  0  0  0  0  0  0  0
    9.8211   -4.1737    0.0000 H   0  0  0  0  0  0  0  0  0  0  0  0
    7.7608   -2.3027    0.0000 H   0  0  0  0  0  0  0  0  0  0  0  0
    6.9949   -2.4190    0.0000 H   0  0  0  0  0  0  0  0  0  0  0  0
    6.1730   -2.0974    0.0000 H   0  0  0  0  0  0  0  0  0  0  0  0
    5.6894   -1.4923    0.0000 H   0  0  0  0  0  0  0  0  0  0  0  0
    5.5569   -0.6197    0.0000 H   0  0  0  0  0  0  0  0  0  0  0  0
    5.8392    0.1017    0.0000 H   0  0  0  0  0  0  0  0  0  0  0  0
    6.5286    0.6527    0.0000 H   0  0  0  0  0  0  0  0  0  0  0  0
    7.2945    0.7690    0.0000 H   0  0  0  0  0  0  0  0  0  0  0  0
    7.6654    0.5057    0.0000 H   0  0  0  0  0  0  0  0  0  0  0  0
    9.0781    0.7202    0.0000 H   0  0  0  0  0  0  0  0  0  0  0  0
    9.9702   -0.3961    0.0000 H   0  0  0  0  0  0  0  0  0  0  0  0
   10.4909    0.9347    0.0000 H   0  0  0  0  0  0  0  0  0  0  0  0
   12.0365   -0.4915    0.0000 H   0  0  0  0  0  0  0  0  0  0  0  0
   12.5197   -0.3286    0.0000 H   0  0  0  0  0  0  0  0  0  0  0  0
   11.7798    1.9648    0.0000 H   0  0  0  0  0  0  0  0  0  0  0  0
    9.9229   -0.8205    0.0000 H   0  0  0  0  0  0  0  0  0  0  0  0
   10.8623   -1.5123    0.0000 H   0  0  0  0  0  0  0  0  0  0  0  0
   11.4626   -0.3013    0.0000 H   0  0  0  0  0  0  0  0  0  0  0  0
   11.1918    1.7306    0.0000 H   0  0  0  0  0  0  0  0  0  0  0  0
    9.8138    1.8615    0.0000 H   0  0  0  0  0  0  0  0  0  0  0  0
    8.7375    2.4967    0.0000 H   0  0  0  0  0  0  0  0  0  0  0  0
    8.6641    2.7143    0.0000 H   0  0  0  0  0  0  0  0  0  0  0  0
    8.5316    3.5869    0.0000 H   0  0  0  0  0  0  0  0  0  0  0  0
    8.8139    4.3083    0.0000 H   0  0  0  0  0  0  0  0  0  0  0  0
    9.2273    4.4979    0.0000 H   0  0  0  0  0  0  0  0  0  0  0  0
   10.6400    4.7123    0.0000 H   0  0  0  0  0  0  0  0  0  0  0  0
   11.7072    3.1763    0.0000 H   0  0  0  0  0  0  0  0  0  0  0  0
   11.4249    2.4549    0.0000 H   0  0  0  0  0  0  0  0  0  0  0  0
   12.1001    5.3512    0.0000 H   0  0  0  0  0  0  0  0  0  0  0  0
   11.1607    6.0431    0.0000 H   0  0  0  0  0  0  0  0  0  0  0  0
   10.4688    5.1036    0.0000 H   0  0  0  0  0  0  0  0  0  0  0  0
   10.5162    5.5280    0.0000 H   0  0  0  0  0  0  0  0  0  0  0  0
    8.9740    2.3606    0.0000 H   0  0  0  0  0  0  0  0  0  0  0  0
    8.1860    1.8364    0.0000 H   0  0  0  0  0  0  0  0  0  0  0  0
    8.6537    0.7676    0.0000 H   0  0  0  0  0  0  0  0  0  0  0  0
    8.1042   -3.0378    0.0000 H   0  0  0  0  0  0  0  0  0  0  0  0
    8.5377   -3.2287    0.0000 H   0  0  0  0  0  0  0  0  0  0  0  0
    8.4083   -4.3882    0.0000 H   0  0  0  0  0  0  0  0  0  0  0  0
    9.5678   -4.5176    0.0000 H   0  0  0  0  0  0  0  0  0  0  0  0
   11.2780   -4.6552    0.0000 H   0  0  0  0  0  0  0  0  0  0  0  0
   12.1259   -5.0755    0.0000 H   0  0  0  0  0  0  0  0  0  0  0  0
   12.8178   -4.1360    0.0000 H   0  0  0  0  0  0  0  0  0  0  0  0
   12.2221   -3.6974    0.0000 H   0  0  0  0  0  0  0  0  0  0  0  0
   13.2910   -3.2297    0.0000 H   0  0  0  0  0  0  0  0  0  0  0  0
   12.8233   -2.1609    0.0000 H   0  0  0  0  0  0  0  0  0  0  0  0
   13.3519   -0.1025    0.0000 H   0  0  0  0  0  0  0  0  0  0  0  0
   12.6624    0.0020    0.0000 H   0  0  0  0  0  0  0  0  0  0  0  0
   12.1037   -1.0223    0.0000 H   0  0  0  0  0  0  0  0  0  0  0  0
   15.2588   -1.4510    0.0000 H   0  0  0  0  0  0  0  0  0  0  0  0
   15.8486   -0.4444    0.0000 H   0  0  0  0  0  0  0  0  0  0  0  0
   14.8420    0.1455    0.0000 H   0  0  0  0  0  0  0  0  0  0  0  0
  1  2  1  0  0  0  0
  3  2  1  6  0  0  0
  3  4  1  0  0  0  0
  4  5  2  0  0  0  0
  5  6  1  0  0  0  0
  6  7  1  0  0  0  0
  7  8  1  0  0  0  0
  8  9  1  0  0  0  0
  9 10  1  0  0  0  0
 10 11  1  0  0  0  0
 11 12  1  0  0  0  0
 12 13  1  0  0  0  0
 13 14  1  0  0  0  0
 14 15  1  0  0  0  0
 10 15  1  0  0  0  0
 14 16  1  0  0  0  0
 16 17  2  0  0  0  0
 16 18  1  0  0  0  0
 18 19  2  0  0  0  0
 18 20  1  0  0  0  0
 20 21  1  0  0  0  0
 21 22  1  0  0  0  0
 22 23  1  0  0  0  0
 23 24  1  0  0  0  0
 24 25  1  0  0  0  0
 20 25  1  0  0  0  0
 25 26  1  0  0  0  0
 26 27  2  0  0  0  0
 26 28  1  0  0  0  0
 28 29  1  0  0  0  0
 29 30  1  0  0  0  0
 30 31  1  0  0  0  0
 31 32  1  0  0  0  0
 32 33  1  0  0  0  0
  3 33  1  0  0  0  0
 33 34  2  0  0  0  0
 31 35  1  1  0  0  0
 30 36  1  1  0  0  0
 29 37  1  6  0  0  0
 37 38  2  0  0  0  0
 39 38  1  6  0  0  0
 39 40  1  0  0  0  0
 40 41  1  0  0  0  0
 41 42  1  0  0  0  0
 42 43  1  0  0  0  0
 43 44  1  0  0  0  0
 39 44  1  0  0  0  0
 43 45  1  6  0  0  0
 45 46  1  0  0  0  0
 42 47  1  1  0  0  0
 37 48  1  0  0  0  0
 14 49  1  1  0  0  0
 13 50  1  1  0  0  0
 11 51  1  1  0  0  0
 51 52  1  0  0  0  0
  9 53  1  6  0  0  0
 53 54  1  0  0  0  0
  7 55  1  1  0  0  0
  5 56  1  0  0  0  0
  1 57  1  0  0  0  0
  1 58  1  0  0  0  0
  1 59  1  0  0  0  0
  2 60  1  0  0  0  0
  2 61  1  0  0  0  0
  3 62  1  1  0  0  0
  4 63  1  0  0  0  0
  6 64  1  0  0  0  0
  6 65  1  0  0  0  0
  7 66  1  6  0  0  0
  8 67  1  0  0  0  0
  8 68  1  0  0  0  0
  9 69  1  1  0  0  0
 10 70  1  1  0  0  0
 11 71  1  6  0  0  0
 12 72  1  0  0  0  0
 12 73  1  0  0  0  0
 13 74  1  6  0  0  0
 21 75  1  0  0  0  0
 21 76  1  0  0  0  0
 22 77  1  0  0  0  0
 22 78  1  0  0  0  0
 23 79  1  0  0  0  0
 23 80  1  0  0  0  0
 24 81  1  0  0  0  0
 24 82  1  0  0  0  0
 25 83  1  6  0  0  0
 29 84  1  1  0  0  0
 30 85  1  6  0  0  0
 31 86  1  6  0  0  0
 32 87  1  0  0  0  0
 32 88  1  0  0  0  0
 35 89  1  0  0  0  0
 36 90  1  0  0  0  0
 36 91  1  0  0  0  0
 36 92  1  0  0  0  0
 38 93  1  0  0  0  0
 39 94  1  1  0  0  0
 40 95  1  0  0  0  0
 40 96  1  0  0  0  0
 41 97  1  0  0  0  0
 41 98  1  0  0  0  0
 42 99  1  6  0  0  0
 43100  1  1  0  0  0
 44101  1  0  0  0  0
 44102  1  0  0  0  0
 46103  1  0  0  0  0
 46104  1  0  0  0  0
 46105  1  0  0  0  0
 47106  1  0  0  0  0
 48107  1  0  0  0  0
 48108  1  0  0  0  0
 48109  1  0  0  0  0
 49110  1  0  0  0  0
 50111  1  0  0  0  0
 50112  1  0  0  0  0
 50113  1  0  0  0  0
 52114  1  0  0  0  0
 52115  1  0  0  0  0
 52116  1  0  0  0  0
 54117  1  0  0  0  0
 54118  1  0  0  0  0
 54119  1  0  0  0  0
 55120  1  0  0  0  0
 55121  1  0  0  0  0
 55122  1  0  0  0  0
 56123  1  0  0  0  0
 56124  1  0  0  0  0
 56125  1  0  0  0  0
M  END
$$$$
67
  Mrv0541 12152312282D          

 20 20  0  0  0  0            999 V2000
    0.0000    2.4750    0.0000 C   0  0  0  0  0  0  0  0  0  0  0  0
    0.7145    2.0625    0.0000 O   0  0  0  0  0  0  0  0  0  0  0  0
    0.7145    1.2375    0.0000 C   0  0  0  0  0  0  0  0  0  0  0  0
    1.4289    0.8250    0.0000 C   0  0  0  0  0  0  0  0  0  0  0  0
    1.4289   -0.0000    0.0000 C   0  0  0  0  0  0  0  0  0  0  0  0
    0.7145   -0.4125    0.0000 C   0  0  0  0  0  0  0  0  0  0  0  0
    0.0000    0.0000    0.0000 C   0  0  0  0  0  0  0  0  0  0  0  0
    0.0000    0.8250    0.0000 C   0  0  0  0  0  0  0  0  0  0  0  0
    0.7145   -1.2375    0.0000 C   0  0  0  0  0  0  0  0  0  0  0  0
    1.4289   -1.6500    0.0000 O   0  0  0  0  0  0  0  0  0  0  0  0
    0.4125    3.1895    0.0000 H   0  0  0  0  0  0  0  0  0  0  0  0
   -0.7145    2.8875    0.0000 H   0  0  0  0  0  0  0  0  0  0  0  0
   -0.4125    1.7605    0.0000 H   0  0  0  0  0  0  0  0  0  0  0  0
    2.1434    1.2375    0.0000 H   0  0  0  0  0  0  0  0  0  0  0  0
    2.1434   -0.4125    0.0000 H   0  0  0  0  0  0  0  0  0  0  0  0
   -0.7145   -0.4125    0.0000 H   0  0  0  0  0  0  0  0  0  0  0  0
   -0.7145    1.2375    0.0000 H   0  0  0  0  0  0  0  0  0  0  0  0
   -0.1100   -1.2663    0.0000 H   0  0  0  0  0  0  0  0  0  0  0  0
    0.2773   -1.9371    0.0000 H   0  0  0  0  0  0  0  0  0  0  0  0
    1.4289   -2.4750    0.0000 H   0  0  0  0  0  0  0  0  0  0  0  0
  1  2  1  0  0  0  0
  2  3  1  0  0  0  0
  3  4  4  0  0  0  0
  4  5  4  0  0  0  0
  5  6  4  0  0  0  0
  6  7  4  0  0  0  0
  7  8  4  0  0  0  0
  3  8  4  0  0  0  0
  6  9  1  0  0  0  0
  9 10  1  0  0  0  0
  1 11  1  0  0  0  0
  1 12  1  0  0  0  0
  1 13  1  0  0  0  0
  4 14  1  0  0  0  0
  5 15  1  0  0  0  0
  7 16  1  0  0  0  0
  8 17  1  0  0  0  0
  9 18  1  0  0  0  0
  9 19  1  0  0  0  0
 10 20  1  0  0  0  0
M  END
$$$$
68
  Mrv0541 12152312282D          

 46 49  0  0  1  0            999 V2000
    3.8974   -1.0396    0.0000 C   0  0  0  0  0  0  0  0  0  0  0  0
    3.6425   -0.2549    0.0000 C   0  0  1  0  0  0  0  0  0  0  0  0
    4.1274    0.4125    0.0000 C   0  0  0  0  0  0  0  0  0  0  0  0
    3.6425    1.0799    0.0000 O   0  0  0  0  0  0  0  0  0  0  0  0
    2.8579    0.8250    0.0000 C   0  0  1  0  0  0  0  0  0  0  0  0
    2.8579    0.0000    0.0000 N   0  0  0  0  0  0  0  0  0  0  0  0
    2.1434   -0.4125    0.0000 C   0  0  0  0  0  0  0  0  0  0  0  0
    2.1434   -1.2375    0.0000 O   0  0  0  0  0  0  0  0  0  0  0  0
    1.4289   -0.0000    0.0000 C   0  0  0  0  0  0  0  0  0  0  0  0
    0.7145   -0.4125    0.0000 C   0  0  0  0  0  0  0  0  0  0  0  0
   -0.0000    0.0000    0.0000 C   0  0  0  0  0  0  0  0  0  0  0  0
   -0.7145   -0.4125    0.0000 O   0  0  0  0  0  0  0  0  0  0  0  0
    0.0000    0.8250    0.0000 C   0  0  0  0  0  0  0  0  0  0  0  0
    0.7145    1.2375    0.0000 C   0  0  0  0  0  0  0  0  0  0  0  0
    1.4289    0.8250    0.0000 N   0  0  0  0  0  0  0  0  0  0  0  0
    2.1434    1.2375    0.0000 C   0  0  0  0  0  0  0  0  0  0  0  0
   -0.7145    1.2375    0.0000 C   0  0  0  0  0  0  0  0  0  0  0  0
   -1.4289    0.8250    0.0000 O   0  0  0  0  0  0  0  0  0  0  0  0
   -0.7145    2.0625    0.0000 N   0  0  0  0  0  0  0  0  0  0  0  0
   -1.4289    2.4750    0.0000 C   0  0  0  0  0  0  0  0  0  0  0  0
   -1.4289    3.3000    0.0000 C   0  0  0  0  0  0  0  0  0  0  0  0
   -2.1434    3.7125    0.0000 C   0  0  0  0  0  0  0  0  0  0  0  0
   -2.1434    4.5375    0.0000 C   0  0  0  0  0  0  0  0  0  0  0  0
   -1.4289    4.9500    0.0000 C   0  0  0  0  0  0  0  0  0  0  0  0
   -0.7145    4.5375    0.0000 C   0  0  0  0  0  0  0  0  0  0  0  0
   -0.7145    3.7125    0.0000 C   0  0  0  0  0  0  0  0  0  0  0  0
   -1.4289    5.7750    0.0000 F   0  0  0  0  0  0  0  0  0  0  0  0
   -2.8579    3.3000    0.0000 F   0  0  0  0  0  0  0  0  0  0  0  0
    0.7145   -1.2375    0.0000 O   0  0  0  0  0  0  0  0  0  0  0  0
    3.1128   -1.2945    0.0000 H   0  0  0  0  0  0  0  0  0  0  0  0
    4.1524   -1.8242    0.0000 H   0  0  0  0  0  0  0  0  0  0  0  0
    4.6821   -0.7846    0.0000 H   0  0  0  0  0  0  0  0  0  0  0  0
    4.4573   -0.3840    0.0000 H   0  0  0  0  0  0  0  0  0  0  0  0
    4.8462    0.0075    0.0000 H   0  0  0  0  0  0  0  0  0  0  0  0
    4.8462    0.8175    0.0000 H   0  0  0  0  0  0  0  0  0  0  0  0
    2.9441    1.6455    0.0000 H   0  0  0  0  0  0  0  0  0  0  0  0
    0.7145    2.0625    0.0000 H   0  0  0  0  0  0  0  0  0  0  0  0
    1.7561    1.9659    0.0000 H   0  0  0  0  0  0  0  0  0  0  0  0
    2.5307    1.9659    0.0000 H   0  0  0  0  0  0  0  0  0  0  0  0
    0.0000    2.4750    0.0000 H   0  0  0  0  0  0  0  0  0  0  0  0
   -1.8661    1.7754    0.0000 H   0  0  0  0  0  0  0  0  0  0  0  0
   -2.2534    2.4462    0.0000 H   0  0  0  0  0  0  0  0  0  0  0  0
   -2.8579    4.9500    0.0000 H   0  0  0  0  0  0  0  0  0  0  0  0
    0.0000    4.9500    0.0000 H   0  0  0  0  0  0  0  0  0  0  0  0
    0.0000    3.3000    0.0000 H   0  0  0  0  0  0  0  0  0  0  0  0
   -0.0000   -1.6500    0.0000 H   0  0  0  0  0  0  0  0  0  0  0  0
  2  1  1  6  0  0  0
  2  3  1  0  0  0  0
  3  4  1  0  0  0  0
  4  5  1  0  0  0  0
  5  6  1  0  0  0  0
  2  6  1  0  0  0  0
  6  7  1  0  0  0  0
  7  8  2  0  0  0  0
  7  9  1  0  0  0  0
  9 10  2  0  0  0  0
 10 11  1  0  0  0  0
 11 12  2  0  0  0  0
 11 13  1  0  0  0  0
 13 14  2  0  0  0  0
 14 15  1  0  0  0  0
  9 15  1  0  0  0  0
 15 16  1  0  0  0  0
  5 16  1  0  0  0  0
 13 17  1  0  0  0  0
 17 18  2  0  0  0  0
 17 19  1  0  0  0  0
 19 20  1  0  0  0  0
 20 21  1  0  0  0  0
 21 22  4  0  0  0  0
 22 23  4  0  0  0  0
 23 24  4  0  0  0  0
 24 25  4  0  0  0  0
 25 26  4  0  0  0  0
 21 26  4  0  0  0  0
 24 27  1  0  0  0  0
 22 28  1  0  0  0  0
 10 29  1  0  0  0  0
  1 30  1  0  0  0  0
  1 31  1  0  0  0  0
  1 32  1  0  0  0  0
  2 33  1  1  0  0  0
  3 34  1  0  0  0  0
  3 35  1  0  0  0  0
  5 36  1  6  0  0  0
 14 37  1  0  0  0  0
 16 38  1  0  0  0  0
 16 39  1  0  0  0  0
 19 40  1  0  0  0  0
 20 41  1  0  0  0  0
 20 42  1  0  0  0  0
 23 43  1  0  0  0  0
 25 44  1  0  0  0  0
 26 45  1  0  0  0  0
 29 46  1  0  0  0  0
M  END
$$$$
69
  Mrv0541 12152312282D          

 57 59  0  0  0  0            999 V2000
   -0.7145   -1.2375    0.0000 C   0  0  0  0  0  0  0  0  0  0  0  0
    0.0000   -1.6500    0.0000 C   0  0  0  0  0  0  0  0  0  0  0  0
    0.7145   -1.2375    0.0000 C   0  0  0  0  0  0  0  0  0  0  0  0
    1.4289   -1.6500    0.0000 C   0  0  0  0  0  0  0  0  0  0  0  0
    1.4289   -2.4750    0.0000 C   0  0  0  0  0  0  0  0  0  0  0  0
    2.1434   -2.8875    0.0000 C   0  0  0  0  0  0  0  0  0  0  0  0
    2.1434   -3.7125    0.0000 C   0  0  0  0  0  0  0  0  0  0  0  0
    1.4289   -4.1250    0.0000 C   0  0  0  0  0  0  0  0  0  0  0  0
    0.7145   -3.7125    0.0000 C   0  0  0  0  0  0  0  0  0  0  0  0
    0.7145   -2.8875    0.0000 C   0  0  0  0  0  0  0  0  0  0  0  0
    2.1434   -1.2375    0.0000 C   0  0  0  0  0  0  0  0  0  0  0  0
    2.1434   -0.4125    0.0000 C   0  0  0  0  0  0  0  0  0  0  0  0
    2.8579    0.0000    0.0000 C   0  0  0  0  0  0  0  0  0  0  0  0
    3.5724   -0.4125    0.0000 C   0  0  0  0  0  0  0  0  0  0  0  0
    3.5724   -1.2375    0.0000 C   0  0  0  0  0  0  0  0  0  0  0  0
    2.8579   -1.6500    0.0000 C   0  0  0  0  0  0  0  0  0  0  0  0
    4.2868    0.0000    0.0000 O   0  0  0  0  0  0  0  0  0  0  0  0
    5.0013   -0.4125    0.0000 C   0  0  0  0  0  0  0  0  0  0  0  0
    5.7158    0.0000    0.0000 C   0  0  0  0  0  0  0  0  0  0  0  0
    6.4302   -0.4125    0.0000 N   0  0  0  0  0  0  0  0  0  0  0  0
    7.1447    0.0000    0.0000 C   0  0  0  0  0  0  0  0  0  0  0  0
    6.4302   -1.2375    0.0000 C   0  0  0  0  0  0  0  0  0  0  0  0
    0.7145   -0.4125    0.0000 C   0  0  0  0  0  0  0  0  0  0  0  0
   -0.0000   -0.0000    0.0000 C   0  0  0  0  0  0  0  0  0  0  0  0
   -0.0000    0.8250    0.0000 C   0  0  0  0  0  0  0  0  0  0  0  0
    0.7145    1.2375    0.0000 C   0  0  0  0  0  0  0  0  0  0  0  0
    1.4289    0.8250    0.0000 C   0  0  0  0  0  0  0  0  0  0  0  0
    1.4289   -0.0000    0.0000 C   0  0  0  0  0  0  0  0  0  0  0  0
   -0.3020   -0.5230    0.0000 H   0  0  0  0  0  0  0  0  0  0  0  0
   -1.4289   -0.8250    0.0000 H   0  0  0  0  0  0  0  0  0  0  0  0
   -1.1270   -1.9520    0.0000 H   0  0  0  0  0  0  0  0  0  0  0  0
   -0.3873   -2.3784    0.0000 H   0  0  0  0  0  0  0  0  0  0  0  0
    0.3873   -2.3784    0.0000 H   0  0  0  0  0  0  0  0  0  0  0  0
    2.6737   -2.2555    0.0000 H   0  0  0  0  0  0  0  0  0  0  0  0
    2.8579   -4.1250    0.0000 H   0  0  0  0  0  0  0  0  0  0  0  0
    1.4289   -4.9500    0.0000 H   0  0  0  0  0  0  0  0  0  0  0  0
    0.0000   -4.1250    0.0000 H   0  0  0  0  0  0  0  0  0  0  0  0
    0.0000   -2.4750    0.0000 H   0  0  0  0  0  0  0  0  0  0  0  0
    1.6131    0.2195    0.0000 H   0  0  0  0  0  0  0  0  0  0  0  0
    2.8579    0.8250    0.0000 H   0  0  0  0  0  0  0  0  0  0  0  0
    4.2868   -1.6500    0.0000 H   0  0  0  0  0  0  0  0  0  0  0  0
    2.8579   -2.4750    0.0000 H   0  0  0  0  0  0  0  0  0  0  0  0
    4.6140   -1.1409    0.0000 H   0  0  0  0  0  0  0  0  0  0  0  0
    5.6144   -0.9645    0.0000 H   0  0  0  0  0  0  0  0  0  0  0  0
    5.3285    0.7284    0.0000 H   0  0  0  0  0  0  0  0  0  0  0  0
    6.1031    0.7284    0.0000 H   0  0  0  0  0  0  0  0  0  0  0  0
    7.5572   -0.7145    0.0000 H   0  0  0  0  0  0  0  0  0  0  0  0
    7.8592    0.4125    0.0000 H   0  0  0  0  0  0  0  0  0  0  0  0
    6.7322    0.7145    0.0000 H   0  0  0  0  0  0  0  0  0  0  0  0
    5.6550   -1.5197    0.0000 H   0  0  0  0  0  0  0  0  0  0  0  0
    6.4302   -2.0625    0.0000 H   0  0  0  0  0  0  0  0  0  0  0  0
    7.2552   -1.2375    0.0000 H   0  0  0  0  0  0  0  0  0  0  0  0
   -0.7145   -0.4125    0.0000 H   0  0  0  0  0  0  0  0  0  0  0  0
   -0.7145    1.2375    0.0000 H   0  0  0  0  0  0  0  0  0  0  0  0
    0.7145    2.0625    0.0000 H   0  0  0  0  0  0  0  0  0  0  0  0
    2.1434    1.2375    0.0000 H   0  0  0  0  0  0  0  0  0  0  0  0
    1.9592   -0.6320    0.0000 H   0  0  0  0  0  0  0  0  0  0  0  0
  1  2  1  0  0  0  0
  2  3  1  0  0  0  0
  3  4  2  0  0  0  0
  4  5  1  0  0  0  0
  5  6  4  0  0  0  0
  6  7  4  0  0  0  0
  7  8  4  0  0  0  0
  8  9  4  0  0  0  0
  9 10  4  0  0  0  0
  5 10  4  0  0  0  0
  4 11  1  0  0  0  0
 11 12  4  0  0  0  0
 12 13  4  0  0  0  0
 13 14  4  0  0  0  0
 14 15  4  0  0  0  0
 15 16  4  0  0  0  0
 11 16  4  0  0  0  0
 14 17  1  0  0  0  0
 17 18  1  0  0  0  0
 18 19  1  0  0  0  0
 19 20  1  0  0  0  0
 20 21  1  0  0  0  0
 20 22  1  0  0  0  0
  3 23  1  0  0  0  0
 23 24  4  0  0  0  0
 24 25  4  0  0  0  0
 25 26  4  0  0  0  0
 26 27  4  0  0  0  0
 27 28  4  0  0  0  0
 23 28  4  0  0  0  0
  1 29  1  0  0  0  0
  1 30  1  0  0  0  0
  1 31  1  0  0  0  0
  2 32  1  0  0  0  0
  2 33  1  0  0  0  0
  6 34  1  0  0  0  0
  7 35  1  0  0  0  0
  8 36  1  0  0  0  0
  9 37  1  0  0  0  0
 10 38  1  0  0  0  0
 12 39  1  0  0  0  0
 13 40  1  0  0  0  0
 15 41  1  0  0  0  0
 16 42  1  0  0  0  0
 18 43  1  0  0  0  0
 18 44  1  0  0  0  0
 19 45  1  0  0  0  0
 19 46  1  0  0  0  0
 21 47  1  0  0  0  0
 21 48  1  0  0  0  0
 21 49  1  0  0  0  0
 22 50  1  0  0  0  0
 22 51  1  0  0  0  0
 22 52  1  0  0  0  0
 24 53  1  0  0  0  0
 25 54  1  0  0  0  0
 26 55  1  0  0  0  0
 27 56  1  0  0  0  0
 28 57  1  0  0  0  0
M  END
$$$$
70
  Mrv0541 12152312282D          

 37 38  0  0  1  0            999 V2000
   -1.4289   -6.6000    0.0000 C   0  0  0  0  0  0  0  0  0  0  0  0
   -1.4289   -5.7750    0.0000 C   0  0  2  0  0  0  0  0  0  0  0  0
   -2.1434   -5.3625    0.0000 C   0  0  0  0  0  0  0  0  0  0  0  0
   -2.1434   -4.5375    0.0000 O   0  0  0  0  0  0  0  0  0  0  0  0
   -2.8579   -5.7750    0.0000 O   0  0  0  0  0  0  0  0  0  0  0  0
   -3.5724   -5.3625    0.0000 C   0  0  0  0  0  0  0  0  0  0  0  0
   -4.2868   -5.7750    0.0000 C   0  0  0  0  0  0  0  0  0  0  0  0
   -5.0013   -6.1875    0.0000 C   0  0  0  0  0  0  0  0  0  0  0  0
   -0.7145   -5.3625    0.0000 O   0  0  0  0  0  0  0  0  0  0  0  0
    0.0000   -5.7750    0.0000 C   0  0  0  0  0  0  0  0  0  0  0  0
    0.7145   -5.3625    0.0000 C   0  0  0  0  0  0  0  0  0  0  0  0
    1.4289   -5.7750    0.0000 C   0  0  0  0  0  0  0  0  0  0  0  0
    1.4289   -6.6000    0.0000 C   0  0  0  0  0  0  0  0  0  0  0  0
    0.7145   -7.0125    0.0000 C   0  0  0  0  0  0  0  0  0  0  0  0
    0.0000   -6.6000    0.0000 C   0  0  0  0  0  0  0  0  0  0  0  0
    2.1434   -7.0125    0.0000 O   0  0  0  0  0  0  0  0  0  0  0  0
    2.8579   -6.6000    0.0000 C   0  0  0  0  0  0  0  0  0  0  0  0
    2.8579   -5.7750    0.0000 C   0  0  0  0  0  0  0  0  0  0  0  0
    3.5724   -5.3625    0.0000 C   0  0  0  0  0  0  0  0  0  0  0  0
    4.2868   -5.7750    0.0000 C   0  0  0  0  0  0  0  0  0  0  0  0
    4.2868   -6.6000    0.0000 C   0  0  0  0  0  0  0  0  0  0  0  0
    3.5724   -7.0125    0.0000 N   0  0  0  0  0  0  0  0  0  0  0  0
    5.0013   -5.3625    0.0000 Cl  0  0  0  0  0  0  0  0  0  0  0  0
    2.1434   -5.3625    0.0000 F   0  0  0  0  0  0  0  0  0  0  0  0
   -2.2539   -6.6000    0.0000 H   0  0  0  0  0  0  0  0  0  0  0  0
   -1.4289   -7.4250    0.0000 H   0  0  0  0  0  0  0  0  0  0  0  0
   -0.6039   -6.6000    0.0000 H   0  0  0  0  0  0  0  0  0  0  0  0
   -2.1434   -6.1875    0.0000 H   0  0  0  0  0  0  0  0  0  0  0  0
   -3.1850   -4.6341    0.0000 H   0  0  0  0  0  0  0  0  0  0  0  0
   -3.9597   -4.6341    0.0000 H   0  0  0  0  0  0  0  0  0  0  0  0
   -5.7158   -6.6000    0.0000 H   0  0  0  0  0  0  0  0  0  0  0  0
    0.7145   -4.5375    0.0000 H   0  0  0  0  0  0  0  0  0  0  0  0
    2.2414   -5.6317    0.0000 H   0  0  0  0  0  0  0  0  0  0  0  0
    0.7145   -7.8375    0.0000 H   0  0  0  0  0  0  0  0  0  0  0  0
   -0.7145   -7.0125    0.0000 H   0  0  0  0  0  0  0  0  0  0  0  0
    3.5724   -4.5375    0.0000 H   0  0  0  0  0  0  0  0  0  0  0  0
    5.0013   -7.0125    0.0000 H   0  0  0  0  0  0  0  0  0  0  0  0
  2  1  1  6  0  0  0
  2  3  1  0  0  0  0
  3  4  2  0  0  0  0
  3  5  1  0  0  0  0
  5  6  1  0  0  0  0
  6  7  1  0  0  0  0
  7  8  3  0  0  0  0
  2  9  1  0  0  0  0
  9 10  1  0  0  0  0
 10 11  4  0  0  0  0
 11 12  4  0  0  0  0
 12 13  4  0  0  0  0
 13 14  4  0  0  0  0
 14 15  4  0  0  0  0
 10 15  4  0  0  0  0
 13 16  1  0  0  0  0
 16 17  1  0  0  0  0
 17 18  4  0  0  0  0
 18 19  4  0  0  0  0
 19 20  4  0  0  0  0
 20 21  4  0  0  0  0
 21 22  4  0  0  0  0
 17 22  4  0  0  0  0
 20 23  1  0  0  0  0
 18 24  1  0  0  0  0
  1 25  1  0  0  0  0
  1 26  1  0  0  0  0
  1 27  1  0  0  0  0
  2 28  1  1  0  0  0
  6 29  1  0  0  0  0
  6 30  1  0  0  0  0
  8 31  1  0  0  0  0
 11 32  1  0  0  0  0
 12 33  1  0  0  0  0
 14 34  1  0  0  0  0
 15 35  1  0  0  0  0
 19 36  1  0  0  0  0
 21 37  1  0  0  0  0
M  END
$$$$
71
  Mrv0541 12152312282D          

 19 19  0  0  0  0            999 V2000
    0.8566    1.3632    0.0000 C   0  0  0  0  0  0  0  0  0  0  0  0
    1.5999    1.0053    0.0000 C   0  0  0  0  0  0  0  0  0  0  0  0
    1.7834    0.2009    0.0000 C   0  0  0  0  0  0  0  0  0  0  0  0
    1.2691   -0.4441    0.0000 C   0  0  0  0  0  0  0  0  0  0  0  0
    1.6270   -1.1874    0.0000 O   0  0  0  0  0  0  0  0  0  0  0  0
    0.4441   -0.4441    0.0000 N   0  0  0  0  0  0  0  0  0  0  0  0
   -0.0703    0.2009    0.0000 C   0  0  0  0  0  0  0  0  0  0  0  0
    0.1133    1.0053    0.0000 C   0  0  0  0  0  0  0  0  0  0  0  0
    1.2311    2.0983    0.0000 H   0  0  0  0  0  0  0  0  0  0  0  0
    0.4820    2.0983    0.0000 H   0  0  0  0  0  0  0  0  0  0  0  0
    1.9411    1.7564    0.0000 H   0  0  0  0  0  0  0  0  0  0  0  0
    2.4081    1.1707    0.0000 H   0  0  0  0  0  0  0  0  0  0  0  0
    2.5834    0.4025    0.0000 H   0  0  0  0  0  0  0  0  0  0  0  0
    2.4168   -0.3278    0.0000 H   0  0  0  0  0  0  0  0  0  0  0  0
    0.0861   -1.1874    0.0000 H   0  0  0  0  0  0  0  0  0  0  0  0
   -0.7036   -0.3278    0.0000 H   0  0  0  0  0  0  0  0  0  0  0  0
   -0.8703    0.4025    0.0000 H   0  0  0  0  0  0  0  0  0  0  0  0
   -0.6950    1.1707    0.0000 H   0  0  0  0  0  0  0  0  0  0  0  0
   -0.2279    1.7564    0.0000 H   0  0  0  0  0  0  0  0  0  0  0  0
  1  2  1  0  0  0  0
  2  3  1  0  0  0  0
  3  4  1  0  0  0  0
  4  5  2  0  0  0  0
  4  6  1  0  0  0  0
  6  7  1  0  0  0  0
  7  8  1  0  0  0  0
  1  8  1  0  0  0  0
  1  9  1  0  0  0  0
  1 10  1  0  0  0  0
  2 11  1  0  0  0  0
  2 12  1  0  0  0  0
  3 13  1  0  0  0  0
  3 14  1  0  0  0  0
  6 15  1  0  0  0  0
  7 16  1  0  0  0  0
  7 17  1  0  0  0  0
  8 18  1  0  0  0  0
  8 19  1  0  0  0  0
M  END
$$$$
72
  Mrv0541 12152312282D          

 82 87  0  0  0  0            999 V2000
    8.6357    2.3723    0.0000 C   0  0  0  0  0  0  0  0  0  0  0  0
    8.3001    1.6186    0.0000 C   0  0  0  0  0  0  0  0  0  0  0  0
    7.5464    1.9542    0.0000 C   0  0  0  0  0  0  0  0  0  0  0  0
    9.0538    1.2831    0.0000 C   0  0  0  0  0  0  0  0  0  0  0  0
    7.9646    0.8650    0.0000 C   0  0  0  0  0  0  0  0  0  0  0  0
    8.3771    0.1505    0.0000 N   0  0  0  0  0  0  0  0  0  0  0  0
    7.8250   -0.4626    0.0000 N   0  0  0  0  0  0  0  0  0  0  0  0
    7.0714   -0.1271    0.0000 C   0  0  0  0  0  0  0  0  0  0  0  0
    7.1576    0.6934    0.0000 C   0  0  0  0  0  0  0  0  0  0  0  0
    6.3569   -0.5396    0.0000 N   0  0  0  0  0  0  0  0  0  0  0  0
    5.6424   -0.1271    0.0000 C   0  0  0  0  0  0  0  0  0  0  0  0
    5.6424    0.6979    0.0000 O   0  0  0  0  0  0  0  0  0  0  0  0
    4.9279   -0.5396    0.0000 N   0  0  0  0  0  0  0  0  0  0  0  0
    4.2135   -0.1271    0.0000 C   0  0  0  0  0  0  0  0  0  0  0  0
    3.4990   -0.5396    0.0000 C   0  0  0  0  0  0  0  0  0  0  0  0
    3.4990   -1.3646    0.0000 C   0  0  0  0  0  0  0  0  0  0  0  0
    2.7845   -1.7771    0.0000 C   0  0  0  0  0  0  0  0  0  0  0  0
    2.0701   -1.3646    0.0000 C   0  0  0  0  0  0  0  0  0  0  0  0
    2.0701   -0.5396    0.0000 C   0  0  0  0  0  0  0  0  0  0  0  0
    2.7845   -0.1271    0.0000 C   0  0  0  0  0  0  0  0  0  0  0  0
    2.7845    0.6979    0.0000 S   0  0  0  0  0  0  0  0  0  0  0  0
    2.0701    1.1104    0.0000 C   0  0  0  0  0  0  0  0  0  0  0  0
    1.3556    0.6979    0.0000 C   0  0  0  0  0  0  0  0  0  0  0  0
    0.6411    1.1104    0.0000 N   0  0  0  0  0  0  0  0  0  0  0  0
    0.6411    1.9354    0.0000 C   0  0  0  0  0  0  0  0  0  0  0  0
   -0.1435    2.1904    0.0000 N   0  0  0  0  0  0  0  0  0  0  0  0
   -0.6284    1.5229    0.0000 N   0  0  0  0  0  0  0  0  0  0  0  0
   -0.1435    0.8555    0.0000 C   0  0  0  0  0  0  0  0  0  0  0  0
   -0.3984    0.0709    0.0000 C   0  0  0  0  0  0  0  0  0  0  0  0
    0.1536   -0.5422    0.0000 C   0  0  0  0  0  0  0  0  0  0  0  0
   -0.1014   -1.3268    0.0000 C   0  0  0  0  0  0  0  0  0  0  0  0
   -0.9083   -1.4984    0.0000 C   0  0  0  0  0  0  0  0  0  0  0  0
   -1.4604   -0.8853    0.0000 C   0  0  0  0  0  0  0  0  0  0  0  0
   -1.2054   -0.1006    0.0000 C   0  0  0  0  0  0  0  0  0  0  0  0
   -1.7575    0.5124    0.0000 S   0  0  0  0  0  0  0  0  0  0  0  0
   -2.5644    0.3409    0.0000 C   0  0  0  0  0  0  0  0  0  0  0  0
   -3.1165    0.9540    0.0000 C   0  0  0  0  0  0  0  0  0  0  0  0
   -3.9234    0.7825    0.0000 O   0  0  0  0  0  0  0  0  0  0  0  0
    1.3556    2.3479    0.0000 C   0  0  0  0  0  0  0  0  0  0  0  0
    2.0701    1.9354    0.0000 C   0  0  0  0  0  0  0  0  0  0  0  0
    7.9966   -1.2696    0.0000 C   0  0  0  0  0  0  0  0  0  0  0  0
    8.7812   -1.5245    0.0000 C   0  0  0  0  0  0  0  0  0  0  0  0
    8.9527   -2.3315    0.0000 C   0  0  0  0  0  0  0  0  0  0  0  0
    8.3396   -2.8835    0.0000 C   0  0  0  0  0  0  0  0  0  0  0  0
    7.5550   -2.6286    0.0000 C   0  0  0  0  0  0  0  0  0  0  0  0
    7.3835   -1.8216    0.0000 C   0  0  0  0  0  0  0  0  0  0  0  0
    8.5111   -3.6905    0.0000 O   0  0  0  0  0  0  0  0  0  0  0  0
    9.7373   -2.5864    0.0000 Cl  0  0  0  0  0  0  0  0  0  0  0  0
    9.4587    2.3148    0.0000 H   0  0  0  0  0  0  0  0  0  0  0  0
    8.9712    3.1260    0.0000 H   0  0  0  0  0  0  0  0  0  0  0  0
    7.8127    2.4298    0.0000 H   0  0  0  0  0  0  0  0  0  0  0  0
    7.6040    2.7772    0.0000 H   0  0  0  0  0  0  0  0  0  0  0  0
    6.7928    2.2897    0.0000 H   0  0  0  0  0  0  0  0  0  0  0  0
    7.2109    1.2005    0.0000 H   0  0  0  0  0  0  0  0  0  0  0  0
    8.7182    0.5294    0.0000 H   0  0  0  0  0  0  0  0  0  0  0  0
    9.8075    0.9475    0.0000 H   0  0  0  0  0  0  0  0  0  0  0  0
    9.1113    2.1061    0.0000 H   0  0  0  0  0  0  0  0  0  0  0  0
    6.5445    1.2455    0.0000 H   0  0  0  0  0  0  0  0  0  0  0  0
    6.3569   -1.3646    0.0000 H   0  0  0  0  0  0  0  0  0  0  0  0
    4.9279   -1.3646    0.0000 H   0  0  0  0  0  0  0  0  0  0  0  0
    4.6008    0.6014    0.0000 H   0  0  0  0  0  0  0  0  0  0  0  0
    3.8262    0.6014    0.0000 H   0  0  0  0  0  0  0  0  0  0  0  0
    4.2135   -1.7771    0.0000 H   0  0  0  0  0  0  0  0  0  0  0  0
    2.7845   -2.6021    0.0000 H   0  0  0  0  0  0  0  0  0  0  0  0
    1.3556   -1.7771    0.0000 H   0  0  0  0  0  0  0  0  0  0  0  0
    1.2576   -0.3963    0.0000 H   0  0  0  0  0  0  0  0  0  0  0  0
    1.0734   -0.0773    0.0000 H   0  0  0  0  0  0  0  0  0  0  0  0
    0.9606   -0.3707    0.0000 H   0  0  0  0  0  0  0  0  0  0  0  0
    0.4507   -1.9399    0.0000 H   0  0  0  0  0  0  0  0  0  0  0  0
   -1.1633   -2.2830    0.0000 H   0  0  0  0  0  0  0  0  0  0  0  0
   -2.2673   -1.0568    0.0000 H   0  0  0  0  0  0  0  0  0  0  0  0
   -2.4212   -0.4715    0.0000 H   0  0  0  0  0  0  0  0  0  0  0  0
   -3.1579   -0.2322    0.0000 H   0  0  0  0  0  0  0  0  0  0  0  0
   -2.5230    1.5271    0.0000 H   0  0  0  0  0  0  0  0  0  0  0  0
   -3.2597    1.7665    0.0000 H   0  0  0  0  0  0  0  0  0  0  0  0
   -4.4755    1.3956    0.0000 H   0  0  0  0  0  0  0  0  0  0  0  0
    1.3556    3.1729    0.0000 H   0  0  0  0  0  0  0  0  0  0  0  0
    2.7845    2.3479    0.0000 H   0  0  0  0  0  0  0  0  0  0  0  0
    9.3943   -0.9725    0.0000 H   0  0  0  0  0  0  0  0  0  0  0  0
    6.9419   -3.1806    0.0000 H   0  0  0  0  0  0  0  0  0  0  0  0
    6.5988   -1.5667    0.0000 H   0  0  0  0  0  0  0  0  0  0  0  0
    7.8980   -4.2425    0.0000 H   0  0  0  0  0  0  0  0  0  0  0  0
  1  2  1  0  0  0  0
  2  3  1  0  0  0  0
  2  4  1  0  0  0  0
  2  5  1  0  0  0  0
  5  6  4  0  0  0  0
  6  7  4  0  0  0  0
  7  8  4  0  0  0  0
  8  9  4  0  0  0  0
  5  9  4  0  0  0  0
  8 10  1  0  0  0  0
 10 11  1  0  0  0  0
 11 12  2  0  0  0  0
 11 13  1  0  0  0  0
 13 14  1  0  0  0  0
 14 15  1  0  0  0  0
 15 16  4  0  0  0  0
 16 17  4  0  0  0  0
 17 18  4  0  0  0  0
 18 19  4  0  0  0  0
 19 20  4  0  0  0  0
 15 20  4  0  0  0  0
 20 21  1  0  0  0  0
 21 22  1  0  0  0  0
 22 23  4  0  0  0  0
 23 24  4  0  0  0  0
 24 25  4  0  0  0  0
 25 26  4  0  0  0  0
 26 27  4  0  0  0  0
 27 28  4  0  0  0  0
 24 28  4  0  0  0  0
 28 29  1  0  0  0  0
 29 30  4  0  0  0  0
 30 31  4  0  0  0  0
 31 32  4  0  0  0  0
 32 33  4  0  0  0  0
 33 34  4  0  0  0  0
 29 34  4  0  0  0  0
 34 35  1  0  0  0  0
 35 36  1  0  0  0  0
 36 37  1  0  0  0  0
 37 38  1  0  0  0  0
 25 39  4  0  0  0  0
 39 40  4  0  0  0  0
 22 40  4  0  0  0  0
  7 41  1  0  0  0  0
 41 42  4  0  0  0  0
 42 43  4  0  0  0  0
 43 44  4  0  0  0  0
 44 45  4  0  0  0  0
 45 46  4  0  0  0  0
 41 46  4  0  0  0  0
 44 47  1  0  0  0  0
 43 48  1  0  0  0  0
  1 49  1  0  0  0  0
  1 50  1  0  0  0  0
  1 51  1  0  0  0  0
  3 52  1  0  0  0  0
  3 53  1  0  0  0  0
  3 54  1  0  0  0  0
  4 55  1  0  0  0  0
  4 56  1  0  0  0  0
  4 57  1  0  0  0  0
  9 58  1  0  0  0  0
 10 59  1  0  0  0  0
 13 60  1  0  0  0  0
 14 61  1  0  0  0  0
 14 62  1  0  0  0  0
 16 63  1  0  0  0  0
 17 64  1  0  0  0  0
 18 65  1  0  0  0  0
 19 66  1  0  0  0  0
 23 67  1  0  0  0  0
 30 68  1  0  0  0  0
 31 69  1  0  0  0  0
 32 70  1  0  0  0  0
 33 71  1  0  0  0  0
 36 72  1  0  0  0  0
 36 73  1  0  0  0  0
 37 74  1  0  0  0  0
 37 75  1  0  0  0  0
 38 76  1  0  0  0  0
 39 77  1  0  0  0  0
 40 78  1  0  0  0  0
 42 79  1  0  0  0  0
 45 80  1  0  0  0  0
 46 81  1  0  0  0  0
 47 82  1  0  0  0  0
M  END
$$$$
73
  Mrv0541 12152312282D          

 45 47  0  0  0  0            999 V2000
   -1.8659    1.4455    0.0000 C   0  0  0  0  0  0  0  0  0  0  0  0
   -1.4534    0.7310    0.0000 C   0  0  0  0  0  0  0  0  0  0  0  0
   -0.6284    0.7310    0.0000 C   0  0  0  0  0  0  0  0  0  0  0  0
   -1.8659    0.0165    0.0000 C   0  0  0  0  0  0  0  0  0  0  0  0
   -1.4534   -0.6979    0.0000 C   0  0  0  0  0  0  0  0  0  0  0  0
   -1.8659   -1.4124    0.0000 C   0  0  0  0  0  0  0  0  0  0  0  0
   -2.6909   -1.4124    0.0000 C   0  0  0  0  0  0  0  0  0  0  0  0
   -3.1034   -0.6979    0.0000 C   0  0  0  0  0  0  0  0  0  0  0  0
   -2.6909    0.0165    0.0000 C   0  0  0  0  0  0  0  0  0  0  0  0
   -1.4534   -2.1269    0.0000 C   0  0  0  0  0  0  0  0  0  0  0  0
   -1.8659   -2.8414    0.0000 C   0  0  0  0  0  0  0  0  0  0  0  0
   -0.6284   -2.1269    0.0000 C   0  0  0  0  0  0  0  0  0  0  0  0
   -0.6284   -0.6979    0.0000 N   0  0  0  0  0  0  0  0  0  0  0  0
   -0.1435   -1.3654    0.0000 C   0  0  0  0  0  0  0  0  0  0  0  0
   -0.1435   -2.1904    0.0000 O   0  0  0  0  0  0  0  0  0  0  0  0
    0.6411   -1.1104    0.0000 C   0  0  0  0  0  0  0  0  0  0  0  0
    0.6411   -0.2854    0.0000 C   0  0  0  0  0  0  0  0  0  0  0  0
   -0.1435   -0.0305    0.0000 C   0  0  0  0  0  0  0  0  0  0  0  0
   -0.1435    0.7945    0.0000 O   0  0  0  0  0  0  0  0  0  0  0  0
    1.3556    0.1271    0.0000 C   0  0  0  0  0  0  0  0  0  0  0  0
    2.0701   -0.2854    0.0000 C   0  0  0  0  0  0  0  0  0  0  0  0
    2.0701   -1.1104    0.0000 C   0  0  0  0  0  0  0  0  0  0  0  0
    1.3556   -1.5229    0.0000 C   0  0  0  0  0  0  0  0  0  0  0  0
    2.7845    0.1271    0.0000 O   0  0  0  0  0  0  0  0  0  0  0  0
   -1.1515    1.8580    0.0000 H   0  0  0  0  0  0  0  0  0  0  0  0
   -2.2784    2.1599    0.0000 H   0  0  0  0  0  0  0  0  0  0  0  0
   -2.5804    1.0330    0.0000 H   0  0  0  0  0  0  0  0  0  0  0  0
   -1.0409    1.4455    0.0000 H   0  0  0  0  0  0  0  0  0  0  0  0
   -0.6284   -0.0940    0.0000 H   0  0  0  0  0  0  0  0  0  0  0  0
    0.1966    0.7310    0.0000 H   0  0  0  0  0  0  0  0  0  0  0  0
   -0.6284    1.5560    0.0000 H   0  0  0  0  0  0  0  0  0  0  0  0
   -3.1034   -2.1269    0.0000 H   0  0  0  0  0  0  0  0  0  0  0  0
   -3.9284   -0.6979    0.0000 H   0  0  0  0  0  0  0  0  0  0  0  0
   -3.1034    0.7310    0.0000 H   0  0  0  0  0  0  0  0  0  0  0  0
   -2.2784   -2.1269    0.0000 H   0  0  0  0  0  0  0  0  0  0  0  0
   -2.5804   -2.4289    0.0000 H   0  0  0  0  0  0  0  0  0  0  0  0
   -2.2784   -3.5558    0.0000 H   0  0  0  0  0  0  0  0  0  0  0  0
   -1.1515   -3.2539    0.0000 H   0  0  0  0  0  0  0  0  0  0  0  0
   -0.6284   -2.9519    0.0000 H   0  0  0  0  0  0  0  0  0  0  0  0
    0.1966   -2.1269    0.0000 H   0  0  0  0  0  0  0  0  0  0  0  0
   -0.6284   -1.3019    0.0000 H   0  0  0  0  0  0  0  0  0  0  0  0
    1.3556    0.9521    0.0000 H   0  0  0  0  0  0  0  0  0  0  0  0
    2.7845   -1.5229    0.0000 H   0  0  0  0  0  0  0  0  0  0  0  0
    1.3556   -2.3479    0.0000 H   0  0  0  0  0  0  0  0  0  0  0  0
    3.4990   -0.2854    0.0000 H   0  0  0  0  0  0  0  0  0  0  0  0
  1  2  1  0  0  0  0
  2  3  1  0  0  0  0
  2  4  1  0  0  0  0
  4  5  4  0  0  0  0
  5  6  4  0  0  0  0
  6  7  4  0  0  0  0
  7  8  4  0  0  0  0
  8  9  4  0  0  0  0
  4  9  4  0  0  0  0
  6 10  1  0  0  0  0
 10 11  1  0  0  0  0
 10 12  1  0  0  0  0
  5 13  1  0  0  0  0
 13 14  1  0  0  0  0
 14 15  2  0  0  0  0
 14 16  1  0  0  0  0
 16 17  4  0  0  0  0
 17 18  1  0  0  0  0
 13 18  1  0  0  0  0
 18 19  2  0  0  0  0
 17 20  4  0  0  0  0
 20 21  4  0  0  0  0
 21 22  4  0  0  0  0
 22 23  4  0  0  0  0
 16 23  4  0  0  0  0
 21 24  1  0  0  0  0
  1 25  1  0  0  0  0
  1 26  1  0  0  0  0
  1 27  1  0  0  0  0
  2 28  1  0  0  0  0
  3 29  1  0  0  0  0
  3 30  1  0  0  0  0
  3 31  1  0  0  0  0
  7 32  1  0  0  0  0
  8 33  1  0  0  0  0
  9 34  1  0  0  0  0
 10 35  1  0  0  0  0
 11 36  1  0  0  0  0
 11 37  1  0  0  0  0
 11 38  1  0  0  0  0
 12 39  1  0  0  0  0
 12 40  1  0  0  0  0
 12 41  1  0  0  0  0
 20 42  1  0  0  0  0
 22 43  1  0  0  0  0
 23 44  1  0  0  0  0
 24 45  1  0  0  0  0
M  END
$$$$
74
  Mrv0541 12152312282D          

 34 33  0  0  0  0            999 V2000
    3.7125    2.1434    0.0000 C   0  0  0  0  0  0  0  0  0  0  0  0
    3.3000    1.4289    0.0000 C   0  0  0  0  0  0  0  0  0  0  0  0
    2.4750    1.4289    0.0000 C   0  0  0  0  0  0  0  0  0  0  0  0
    2.0625    0.7145    0.0000 C   0  0  0  0  0  0  0  0  0  0  0  0
    1.2375    0.7145    0.0000 C   0  0  0  0  0  0  0  0  0  0  0  0
    0.8250    0.0000    0.0000 C   0  0  0  0  0  0  0  0  0  0  0  0
    0.0000    0.0000    0.0000 C   0  0  0  0  0  0  0  0  0  0  0  0
   -0.4125   -0.7145    0.0000 C   0  0  0  0  0  0  0  0  0  0  0  0
    0.0000   -1.4289    0.0000 O   0  0  0  0  0  0  0  0  0  0  0  0
   -0.4125   -2.1434    0.0000 C   0  0  0  0  0  0  0  0  0  0  0  0
    0.0000   -2.8579    0.0000 O   0  0  0  0  0  0  0  0  0  0  0  0
   -1.2375   -2.1434    0.0000 C   0  0  0  0  0  0  0  0  0  0  0  0
    1.2375   -0.7145    0.0000 C   0  0  0  0  0  0  0  0  0  0  0  0
    3.7125    0.7145    0.0000 C   0  0  0  0  0  0  0  0  0  0  0  0
    4.4270    1.7309    0.0000 H   0  0  0  0  0  0  0  0  0  0  0  0
    4.1250    2.8579    0.0000 H   0  0  0  0  0  0  0  0  0  0  0  0
    2.9980    2.5559    0.0000 H   0  0  0  0  0  0  0  0  0  0  0  0
    2.0625    2.1434    0.0000 H   0  0  0  0  0  0  0  0  0  0  0  0
    2.8695    0.5429    0.0000 H   0  0  0  0  0  0  0  0  0  0  0  0
    2.3716   -0.0505    0.0000 H   0  0  0  0  0  0  0  0  0  0  0  0
    1.2087    1.5390    0.0000 H   0  0  0  0  0  0  0  0  0  0  0  0
    0.5379    1.1517    0.0000 H   0  0  0  0  0  0  0  0  0  0  0  0
   -0.4125    0.7145    0.0000 H   0  0  0  0  0  0  0  0  0  0  0  0
   -1.1409   -0.3272    0.0000 H   0  0  0  0  0  0  0  0  0  0  0  0
   -0.9645   -1.3276    0.0000 H   0  0  0  0  0  0  0  0  0  0  0  0
   -1.5197   -1.3682    0.0000 H   0  0  0  0  0  0  0  0  0  0  0  0
   -2.0625   -2.1434    0.0000 H   0  0  0  0  0  0  0  0  0  0  0  0
   -1.2375   -2.9684    0.0000 H   0  0  0  0  0  0  0  0  0  0  0  0
    0.5230   -1.1270    0.0000 H   0  0  0  0  0  0  0  0  0  0  0  0
    1.6500   -1.4289    0.0000 H   0  0  0  0  0  0  0  0  0  0  0  0
    1.7678   -0.0825    0.0000 H   0  0  0  0  0  0  0  0  0  0  0  0
    3.1822    0.0825    0.0000 H   0  0  0  0  0  0  0  0  0  0  0  0
    4.1250    0.0000    0.0000 H   0  0  0  0  0  0  0  0  0  0  0  0
    4.4270    1.1270    0.0000 H   0  0  0  0  0  0  0  0  0  0  0  0
  1  2  1  0  0  0  0
  2  3  2  0  0  0  0
  3  4  1  0  0  0  0
  4  5  1  0  0  0  0
  5  6  1  0  0  0  0
  6  7  2  0  0  0  0
  7  8  1  0  0  0  0
  8  9  1  0  0  0  0
  9 10  1  0  0  0  0
 10 11  2  0  0  0  0
 10 12  1  0  0  0  0
  6 13  1  0  0  0  0
  2 14  1  0  0  0  0
  1 15  1  0  0  0  0
  1 16  1  0  0  0  0
  1 17  1  0  0  0  0
  3 18  1  0  0  0  0
  4 19  1  0  0  0  0
  4 20  1  0  0  0  0
  5 21  1  0  0  0  0
  5 22  1  0  0  0  0
  7 23  1  0  0  0  0
  8 24  1  0  0  0  0
  8 25  1  0  0  0  0
 12 26  1  0  0  0  0
 12 27  1  0  0  0  0
 12 28  1  0  0  0  0
 13 29  1  0  0  0  0
 13 30  1  0  0  0  0
 13 31  1  0  0  0  0
 14 32  1  0  0  0  0
 14 33  1  0  0  0  0
 14 34  1  0  0  0  0
M  END
$$$$
75
  Mrv0541 12152312282D          

 44 43  0  0  0  0            999 V2000
    5.9961    4.2868    0.0000 C   0  0  0  0  0  0  0  0  0  0  0  0
    6.7105    4.6993    0.0000 C   0  0  0  0  0  0  0  0  0  0  0  0
    7.4250    4.2868    0.0000 C   0  0  0  0  0  0  0  0  0  0  0  0
    8.1395    4.6993    0.0000 C   0  0  0  0  0  0  0  0  0  0  0  0
    8.8539    4.2868    0.0000 O   0  0  0  0  0  0  0  0  0  0  0  0
    9.5684    4.6993    0.0000 C   0  0  0  0  0  0  0  0  0  0  0  0
    9.5684    5.5243    0.0000 O   0  0  0  0  0  0  0  0  0  0  0  0
   10.2829    4.2868    0.0000 C   0  0  0  0  0  0  0  0  0  0  0  0
   10.9974    4.6993    0.0000 C   0  0  0  0  0  0  0  0  0  0  0  0
   11.7118    4.2868    0.0000 C   0  0  0  0  0  0  0  0  0  0  0  0
   12.4263    4.6993    0.0000 C   0  0  0  0  0  0  0  0  0  0  0  0
   13.1408    4.2868    0.0000 C   0  0  0  0  0  0  0  0  0  0  0  0
   13.1408    3.4618    0.0000 O   0  0  0  0  0  0  0  0  0  0  0  0
   13.8552    4.6993    0.0000 O   0  0  0  0  0  0  0  0  0  0  0  0
   14.5697    4.2868    0.0000 C   0  0  0  0  0  0  0  0  0  0  0  0
   15.2842    4.6993    0.0000 C   0  0  0  0  0  0  0  0  0  0  0  0
   15.9987    4.2868    0.0000 C   0  0  0  0  0  0  0  0  0  0  0  0
   16.7131    4.6993    0.0000 C   0  0  0  0  0  0  0  0  0  0  0  0
    5.5836    5.0013    0.0000 H   0  0  0  0  0  0  0  0  0  0  0  0
    5.2816    3.8743    0.0000 H   0  0  0  0  0  0  0  0  0  0  0  0
    6.4086    3.5724    0.0000 H   0  0  0  0  0  0  0  0  0  0  0  0
    6.3232    5.4278    0.0000 H   0  0  0  0  0  0  0  0  0  0  0  0
    7.0978    5.4278    0.0000 H   0  0  0  0  0  0  0  0  0  0  0  0
    7.0377    3.5584    0.0000 H   0  0  0  0  0  0  0  0  0  0  0  0
    7.8123    3.5584    0.0000 H   0  0  0  0  0  0  0  0  0  0  0  0
    7.7522    5.4278    0.0000 H   0  0  0  0  0  0  0  0  0  0  0  0
    8.5268    5.4278    0.0000 H   0  0  0  0  0  0  0  0  0  0  0  0
    9.8956    3.5584    0.0000 H   0  0  0  0  0  0  0  0  0  0  0  0
   10.6702    3.5584    0.0000 H   0  0  0  0  0  0  0  0  0  0  0  0
   10.6100    5.4278    0.0000 H   0  0  0  0  0  0  0  0  0  0  0  0
   11.3847    5.4278    0.0000 H   0  0  0  0  0  0  0  0  0  0  0  0
   11.3245    3.5584    0.0000 H   0  0  0  0  0  0  0  0  0  0  0  0
   12.0991    3.5584    0.0000 H   0  0  0  0  0  0  0  0  0  0  0  0
   12.0390    5.4278    0.0000 H   0  0  0  0  0  0  0  0  0  0  0  0
   12.8136    5.4278    0.0000 H   0  0  0  0  0  0  0  0  0  0  0  0
   14.1824    3.5584    0.0000 H   0  0  0  0  0  0  0  0  0  0  0  0
   14.9570    3.5584    0.0000 H   0  0  0  0  0  0  0  0  0  0  0  0
   14.8969    5.4278    0.0000 H   0  0  0  0  0  0  0  0  0  0  0  0
   15.6715    5.4278    0.0000 H   0  0  0  0  0  0  0  0  0  0  0  0
   15.6113    3.5584    0.0000 H   0  0  0  0  0  0  0  0  0  0  0  0
   16.3860    3.5584    0.0000 H   0  0  0  0  0  0  0  0  0  0  0  0
   17.1256    3.9849    0.0000 H   0  0  0  0  0  0  0  0  0  0  0  0
   17.4276    5.1118    0.0000 H   0  0  0  0  0  0  0  0  0  0  0  0
   16.3006    5.4138    0.0000 H   0  0  0  0  0  0  0  0  0  0  0  0
  1  2  1  0  0  0  0
  2  3  1  0  0  0  0
  3  4  1  0  0  0  0
  4  5  1  0  0  0  0
  5  6  1  0  0  0  0
  6  7  2  0  0  0  0
  6  8  1  0  0  0  0
  8  9  1  0  0  0  0
  9 10  1  0  0  0  0
 10 11  1  0  0  0  0
 11 12  1  0  0  0  0
 12 13  2  0  0  0  0
 12 14  1  0  0  0  0
 14 15  1  0  0  0  0
 15 16  1  0  0  0  0
 16 17  1  0  0  0  0
 17 18  1  0  0  0  0
  1 19  1  0  0  0  0
  1 20  1  0  0  0  0
  1 21  1  0  0  0  0
  2 22  1  0  0  0  0
  2 23  1  0  0  0  0
  3 24  1  0  0  0  0
  3 25  1  0  0  0  0
  4 26  1  0  0  0  0
  4 27  1  0  0  0  0
  8 28  1  0  0  0  0
  8 29  1  0  0  0  0
  9 30  1  0  0  0  0
  9 31  1  0  0  0  0
 10 32  1  0  0  0  0
 10 33  1  0  0  0  0
 11 34  1  0  0  0  0
 11 35  1  0  0  0  0
 15 36  1  0  0  0  0
 15 37  1  0  0  0  0
 16 38  1  0  0  0  0
 16 39  1  0  0  0  0
 17 40  1  0  0  0  0
 17 41  1  0  0  0  0
 18 42  1  0  0  0  0
 18 43  1  0  0  0  0
 18 44  1  0  0  0  0
M  END
$$$$
76
  Mrv0541 12152312282D          

 23 24  0  0  0  0            999 V2000
   -1.8212   -2.1269    0.0000 C   0  0  0  0  0  0  0  0  0  0  0  0
   -1.4087   -1.4124    0.0000 O   0  0  0  0  0  0  0  0  0  0  0  0
   -0.5837   -1.4124    0.0000 C   0  0  0  0  0  0  0  0  0  0  0  0
   -0.1712   -2.1269    0.0000 O   0  0  0  0  0  0  0  0  0  0  0  0
   -0.1712   -0.6979    0.0000 N   0  0  0  0  0  0  0  0  0  0  0  0
    0.6538   -0.6979    0.0000 C   0  0  0  0  0  0  0  0  0  0  0  0
    1.1387   -0.0305    0.0000 N   0  0  0  0  0  0  0  0  0  0  0  0
    1.9233   -0.2854    0.0000 C   0  0  0  0  0  0  0  0  0  0  0  0
    2.6378    0.1271    0.0000 C   0  0  0  0  0  0  0  0  0  0  0  0
    3.3523   -0.2854    0.0000 C   0  0  0  0  0  0  0  0  0  0  0  0
    3.3523   -1.1104    0.0000 C   0  0  0  0  0  0  0  0  0  0  0  0
    2.6378   -1.5229    0.0000 C   0  0  0  0  0  0  0  0  0  0  0  0
    1.9233   -1.1104    0.0000 C   0  0  0  0  0  0  0  0  0  0  0  0
    1.1387   -1.3654    0.0000 N   0  0  0  0  0  0  0  0  0  0  0  0
   -2.5357   -1.7144    0.0000 H   0  0  0  0  0  0  0  0  0  0  0  0
   -2.2337   -2.8414    0.0000 H   0  0  0  0  0  0  0  0  0  0  0  0
   -1.1067   -2.5394    0.0000 H   0  0  0  0  0  0  0  0  0  0  0  0
   -0.5837    0.0165    0.0000 H   0  0  0  0  0  0  0  0  0  0  0  0
    2.6378    0.9521    0.0000 H   0  0  0  0  0  0  0  0  0  0  0  0
    4.0668    0.1271    0.0000 H   0  0  0  0  0  0  0  0  0  0  0  0
    4.0668   -1.5229    0.0000 H   0  0  0  0  0  0  0  0  0  0  0  0
    2.6378   -2.3479    0.0000 H   0  0  0  0  0  0  0  0  0  0  0  0
    0.8838   -2.1500    0.0000 H   0  0  0  0  0  0  0  0  0  0  0  0
  1  2  1  0  0  0  0
  2  3  1  0  0  0  0
  3  4  2  0  0  0  0
  3  5  1  0  0  0  0
  5  6  1  0  0  0  0
  6  7  4  0  0  0  0
  7  8  4  0  0  0  0
  8  9  4  0  0  0  0
  9 10  4  0  0  0  0
 10 11  4  0  0  0  0
 11 12  4  0  0  0  0
 12 13  4  0  0  0  0
  8 13  4  0  0  0  0
 13 14  4  0  0  0  0
  6 14  4  0  0  0  0
  1 15  1  0  0  0  0
  1 16  1  0  0  0  0
  1 17  1  0  0  0  0
  5 18  1  0  0  0  0
  9 19  1  0  0  0  0
 10 20  1  0  0  0  0
 11 21  1  0  0  0  0
 12 22  1  0  0  0  0
 14 23  1  0  0  0  0
M  END
$$$$
77
  Mrv0541 12152312282D          

 29 28  0  0  0  0            999 V2000
    2.4750   -2.8579    0.0000 C   0  0  0  0  0  0  0  0  0  0  0  0
    2.0625   -2.1434    0.0000 C   0  0  0  0  0  0  0  0  0  0  0  0
    2.4750   -1.4289    0.0000 C   0  0  0  0  0  0  0  0  0  0  0  0
    2.0625   -0.7145    0.0000 C   0  0  0  0  0  0  0  0  0  0  0  0
    1.2375   -0.7145    0.0000 C   0  0  0  0  0  0  0  0  0  0  0  0
    0.8250    0.0000    0.0000 C   0  0  0  0  0  0  0  0  0  0  0  0
    0.0000    0.0000    0.0000 C   0  0  0  0  0  0  0  0  0  0  0  0
   -0.4125   -0.7145    0.0000 C   0  0  0  0  0  0  0  0  0  0  0  0
    0.0000   -1.4289    0.0000 O   0  0  0  0  0  0  0  0  0  0  0  0
    1.2375    0.7145    0.0000 C   0  0  0  0  0  0  0  0  0  0  0  0
    1.2375   -2.1434    0.0000 C   0  0  0  0  0  0  0  0  0  0  0  0
    1.7605   -3.2704    0.0000 H   0  0  0  0  0  0  0  0  0  0  0  0
    2.8875   -3.5724    0.0000 H   0  0  0  0  0  0  0  0  0  0  0  0
    3.1895   -2.4454    0.0000 H   0  0  0  0  0  0  0  0  0  0  0  0
    3.3000   -1.4289    0.0000 H   0  0  0  0  0  0  0  0  0  0  0  0
    2.7621   -0.2773    0.0000 H   0  0  0  0  0  0  0  0  0  0  0  0
    1.8076    0.0702    0.0000 H   0  0  0  0  0  0  0  0  0  0  0  0
    1.4924   -1.4991    0.0000 H   0  0  0  0  0  0  0  0  0  0  0  0
    0.5379   -1.1517    0.0000 H   0  0  0  0  0  0  0  0  0  0  0  0
   -0.4125    0.7145    0.0000 H   0  0  0  0  0  0  0  0  0  0  0  0
   -1.1409   -0.3272    0.0000 H   0  0  0  0  0  0  0  0  0  0  0  0
   -1.1409   -1.1018    0.0000 H   0  0  0  0  0  0  0  0  0  0  0  0
   -0.4125   -2.1434    0.0000 H   0  0  0  0  0  0  0  0  0  0  0  0
    2.0500    0.5712    0.0000 H   0  0  0  0  0  0  0  0  0  0  0  0
    1.6500    1.4289    0.0000 H   0  0  0  0  0  0  0  0  0  0  0  0
    0.5230    1.1270    0.0000 H   0  0  0  0  0  0  0  0  0  0  0  0
    0.9553   -1.3682    0.0000 H   0  0  0  0  0  0  0  0  0  0  0  0
    0.4125   -2.1434    0.0000 H   0  0  0  0  0  0  0  0  0  0  0  0
    1.2375   -2.9684    0.0000 H   0  0  0  0  0  0  0  0  0  0  0  0
  1  2  1  0  0  0  0
  2  3  2  0  0  0  0
  3  4  1  0  0  0  0
  4  5  1  0  0  0  0
  5  6  1  0  0  0  0
  6  7  2  0  0  0  0
  7  8  1  0  0  0  0
  8  9  1  0  0  0  0
  6 10  1  0  0  0  0
  2 11  1  0  0  0  0
  1 12  1  0  0  0  0
  1 13  1  0  0  0  0
  1 14  1  0  0  0  0
  3 15  1  0  0  0  0
  4 16  1  0  0  0  0
  4 17  1  0  0  0  0
  5 18  1  0  0  0  0
  5 19  1  0  0  0  0
  7 20  1  0  0  0  0
  8 21  1  0  0  0  0
  8 22  1  0  0  0  0
  9 23  1  0  0  0  0
 10 24  1  0  0  0  0
 10 25  1  0  0  0  0
 10 26  1  0  0  0  0
 11 27  1  0  0  0  0
 11 28  1  0  0  0  0
 11 29  1  0  0  0  0
M  END
$$$$
78
  Mrv0541 12152312282D          

 57 61  0  0  0  0            999 V2000
    1.2039   -1.6856    0.0000 C   0  0  0  0  0  0  0  0  0  0  0  0
    0.3969   -1.5141    0.0000 C   0  0  0  0  0  0  0  0  0  0  0  0
   -0.1551   -2.1272    0.0000 C   0  0  0  0  0  0  0  0  0  0  0  0
   -0.9621   -1.9557    0.0000 C   0  0  0  0  0  0  0  0  0  0  0  0
   -1.5141   -2.5688    0.0000 O   0  0  0  0  0  0  0  0  0  0  0  0
   -1.2170   -1.1711    0.0000 N   0  0  0  0  0  0  0  0  0  0  0  0
   -2.0240   -0.9995    0.0000 C   0  0  0  0  0  0  0  0  0  0  0  0
   -2.2789   -0.2149    0.0000 C   0  0  0  0  0  0  0  0  0  0  0  0
   -1.7269    0.3982    0.0000 C   0  0  0  0  0  0  0  0  0  0  0  0
   -0.9199    0.2267    0.0000 C   0  0  0  0  0  0  0  0  0  0  0  0
   -0.6650   -0.5580    0.0000 C   0  0  0  0  0  0  0  0  0  0  0  0
    0.1420   -0.7295    0.0000 N   0  0  0  0  0  0  0  0  0  0  0  0
    0.0998   -2.9118    0.0000 C   0  0  0  0  0  0  0  0  0  0  0  0
    0.9068   -3.0834    0.0000 C   0  0  0  0  0  0  0  0  0  0  0  0
    1.1617   -3.8680    0.0000 N   0  0  0  0  0  0  0  0  0  0  0  0
    1.9687   -4.0395    0.0000 C   0  0  0  0  0  0  0  0  0  0  0  0
    2.2236   -4.8241    0.0000 C   0  0  0  0  0  0  0  0  0  0  0  0
    1.6716   -5.4372    0.0000 C   0  0  0  0  0  0  0  0  0  0  0  0
    0.8646   -5.2657    0.0000 C   0  0  0  0  0  0  0  0  0  0  0  0
    0.6097   -4.4811    0.0000 C   0  0  0  0  0  0  0  0  0  0  0  0
    1.9265   -6.2218    0.0000 C   0  0  0  0  0  0  0  0  0  0  0  0
    1.4416   -6.8893    0.0000 N   0  0  0  0  0  0  0  0  0  0  0  0
    1.9265   -7.5567    0.0000 O   0  0  0  0  0  0  0  0  0  0  0  0
    2.7112   -7.3018    0.0000 C   0  0  0  0  0  0  0  0  0  0  0  0
    2.7112   -6.4768    0.0000 C   0  0  0  0  0  0  0  0  0  0  0  0
    3.4256   -6.0643    0.0000 C   0  0  0  0  0  0  0  0  0  0  0  0
    4.1401   -6.4768    0.0000 C   0  0  0  0  0  0  0  0  0  0  0  0
    4.1401   -7.3018    0.0000 C   0  0  0  0  0  0  0  0  0  0  0  0
    3.4256   -7.7143    0.0000 C   0  0  0  0  0  0  0  0  0  0  0  0
    4.8546   -7.7143    0.0000 F   0  0  0  0  0  0  0  0  0  0  0  0
    1.3187   -2.5026    0.0000 H   0  0  0  0  0  0  0  0  0  0  0  0
    2.0109   -1.8572    0.0000 H   0  0  0  0  0  0  0  0  0  0  0  0
    1.3754   -0.8787    0.0000 H   0  0  0  0  0  0  0  0  0  0  0  0
   -2.2236   -1.8000    0.0000 H   0  0  0  0  0  0  0  0  0  0  0  0
   -2.7992   -1.2817    0.0000 H   0  0  0  0  0  0  0  0  0  0  0  0
   -3.0720   -0.4423    0.0000 H   0  0  0  0  0  0  0  0  0  0  0  0
   -2.9109    0.3154    0.0000 H   0  0  0  0  0  0  0  0  0  0  0  0
   -2.3204    0.9713    0.0000 H   0  0  0  0  0  0  0  0  0  0  0  0
   -1.5836    1.2106    0.0000 H   0  0  0  0  0  0  0  0  0  0  0  0
   -0.7203    1.0271    0.0000 H   0  0  0  0  0  0  0  0  0  0  0  0
   -0.1447    0.5088    0.0000 H   0  0  0  0  0  0  0  0  0  0  0  0
   -0.6754   -3.1940    0.0000 H   0  0  0  0  0  0  0  0  0  0  0  0
    0.1861   -3.7323    0.0000 H   0  0  0  0  0  0  0  0  0  0  0  0
    1.1064   -2.2829    0.0000 H   0  0  0  0  0  0  0  0  0  0  0  0
    1.6820   -2.8012    0.0000 H   0  0  0  0  0  0  0  0  0  0  0  0
    2.1683   -3.2390    0.0000 H   0  0  0  0  0  0  0  0  0  0  0  0
    2.7439   -3.7573    0.0000 H   0  0  0  0  0  0  0  0  0  0  0  0
    3.0167   -4.5967    0.0000 H   0  0  0  0  0  0  0  0  0  0  0  0
    2.8556   -5.3544    0.0000 H   0  0  0  0  0  0  0  0  0  0  0  0
    2.4786   -5.6088    0.0000 H   0  0  0  0  0  0  0  0  0  0  0  0
    0.6651   -6.0662    0.0000 H   0  0  0  0  0  0  0  0  0  0  0  0
    0.0894   -5.5479    0.0000 H   0  0  0  0  0  0  0  0  0  0  0  0
   -0.1833   -4.7085    0.0000 H   0  0  0  0  0  0  0  0  0  0  0  0
   -0.0223   -3.9508    0.0000 H   0  0  0  0  0  0  0  0  0  0  0  0
    3.4256   -5.2393    0.0000 H   0  0  0  0  0  0  0  0  0  0  0  0
    4.8546   -6.0643    0.0000 H   0  0  0  0  0  0  0  0  0  0  0  0
    3.4256   -8.5393    0.0000 H   0  0  0  0  0  0  0  0  0  0  0  0
  1  2  1  0  0  0  0
  2  3  2  0  0  0  0
  3  4  1  0  0  0  0
  4  5  2  0  0  0  0
  4  6  1  0  0  0  0
  6  7  1  0  0  0  0
  7  8  1  0  0  0  0
  8  9  1  0  0  0  0
  9 10  1  0  0  0  0
 10 11  1  0  0  0  0
  6 11  1  0  0  0  0
 11 12  2  0  0  0  0
  2 12  1  0  0  0  0
  3 13  1  0  0  0  0
 13 14  1  0  0  0  0
 14 15  1  0  0  0  0
 15 16  1  0  0  0  0
 16 17  1  0  0  0  0
 17 18  1  0  0  0  0
 18 19  1  0  0  0  0
 19 20  1  0  0  0  0
 15 20  1  0  0  0  0
 18 21  1  0  0  0  0
 21 22  4  0  0  0  0
 22 23  4  0  0  0  0
 23 24  4  0  0  0  0
 24 25  4  0  0  0  0
 21 25  4  0  0  0  0
 25 26  4  0  0  0  0
 26 27  4  0  0  0  0
 27 28  4  0  0  0  0
 28 29  4  0  0  0  0
 24 29  4  0  0  0  0
 28 30  1  0  0  0  0
  1 31  1  0  0  0  0
  1 32  1  0  0  0  0
  1 33  1  0  0  0  0
  7 34  1  0  0  0  0
  7 35  1  0  0  0  0
  8 36  1  0  0  0  0
  8 37  1  0  0  0  0
  9 38  1  0  0  0  0
  9 39  1  0  0  0  0
 10 40  1  0  0  0  0
 10 41  1  0  0  0  0
 13 42  1  0  0  0  0
 13 43  1  0  0  0  0
 14 44  1  0  0  0  0
 14 45  1  0  0  0  0
 16 46  1  0  0  0  0
 16 47  1  0  0  0  0
 17 48  1  0  0  0  0
 17 49  1  0  0  0  0
 18 50  1  0  0  0  0
 19 51  1  0  0  0  0
 19 52  1  0  0  0  0
 20 53  1  0  0  0  0
 20 54  1  0  0  0  0
 26 55  1  0  0  0  0
 27 56  1  0  0  0  0
 29 57  1  0  0  0  0
M  END
$$$$
79
  Mrv0541 12152312282D          

 16 16  0  0  0  0            999 V2000
    0.7145    2.0625    0.0000 C   0  0  0  0  0  0  0  0  0  0  0  0
    0.7145    1.2375    0.0000 C   0  0  0  0  0  0  0  0  0  0  0  0
    1.4289    0.8250    0.0000 C   0  0  0  0  0  0  0  0  0  0  0  0
    1.4289   -0.0000    0.0000 C   0  0  0  0  0  0  0  0  0  0  0  0
    0.7145   -0.4125    0.0000 C   0  0  0  0  0  0  0  0  0  0  0  0
    0.0000    0.0000    0.0000 C   0  0  0  0  0  0  0  0  0  0  0  0
    0.0000    0.8250    0.0000 C   0  0  0  0  0  0  0  0  0  0  0  0
    0.7145   -1.2375    0.0000 O   0  0  0  0  0  0  0  0  0  0  0  0
    1.5395    2.0625    0.0000 H   0  0  0  0  0  0  0  0  0  0  0  0
    0.7145    2.8875    0.0000 H   0  0  0  0  0  0  0  0  0  0  0  0
   -0.1105    2.0625    0.0000 H   0  0  0  0  0  0  0  0  0  0  0  0
    2.1434    1.2375    0.0000 H   0  0  0  0  0  0  0  0  0  0  0  0
    2.1434   -0.4125    0.0000 H   0  0  0  0  0  0  0  0  0  0  0  0
   -0.7145   -0.4125    0.0000 H   0  0  0  0  0  0  0  0  0  0  0  0
   -0.7145    1.2375    0.0000 H   0  0  0  0  0  0  0  0  0  0  0  0
   -0.0000   -1.6500    0.0000 H   0  0  0  0  0  0  0  0  0  0  0  0
  1  2  1  0  0  0  0
  2  3  4  0  0  0  0
  3  4  4  0  0  0  0
  4  5  4  0  0  0  0
  5  6  4  0  0  0  0
  6  7  4  0  0  0  0
  2  7  4  0  0  0  0
  5  8  1  0  0  0  0
  1  9  1  0  0  0  0
  1 10  1  0  0  0  0
  1 11  1  0  0  0  0
  3 12  1  0  0  0  0
  4 13  1  0  0  0  0
  6 14  1  0  0  0  0
  7 15  1  0  0  0  0
  8 16  1  0  0  0  0
M  END
$$$$
80
  Mrv0541 12152312282D          

 12 12  0  0  0  0            999 V2000
    0.7145    1.2375    0.0000 C   0  0  0  0  0  0  0  0  0  0  0  0
    1.4289    0.8250    0.0000 C   0  0  0  0  0  0  0  0  0  0  0  0
    1.4289   -0.0000    0.0000 C   0  0  0  0  0  0  0  0  0  0  0  0
    0.7145   -0.4125    0.0000 C   0  0  0  0  0  0  0  0  0  0  0  0
    0.0000    0.0000    0.0000 C   0  0  0  0  0  0  0  0  0  0  0  0
    0.0000    0.8250    0.0000 C   0  0  0  0  0  0  0  0  0  0  0  0
   -0.7145    1.2375    0.0000 Cl  0  0  0  0  0  0  0  0  0  0  0  0
    2.1434   -0.4125    0.0000 Cl  0  0  0  0  0  0  0  0  0  0  0  0
    0.7145    2.0625    0.0000 H   0  0  0  0  0  0  0  0  0  0  0  0
    2.1434    1.2375    0.0000 H   0  0  0  0  0  0  0  0  0  0  0  0
    0.7145   -1.2375    0.0000 H   0  0  0  0  0  0  0  0  0  0  0  0
   -0.7145   -0.4125    0.0000 H   0  0  0  0  0  0  0  0  0  0  0  0
  1  2  4  0  0  0  0
  2  3  4  0  0  0  0
  3  4  4  0  0  0  0
  4  5  4  0  0  0  0
  5  6  4  0  0  0  0
  1  6  4  0  0  0  0
  6  7  1  0  0  0  0
  3  8  1  0  0  0  0
  1  9  1  0  0  0  0
  2 10  1  0  0  0  0
  4 11  1  0  0  0  0
  5 12  1  0  0  0  0
M  END
$$$$
81
  Mrv0541 12152312282D          

 14 14  0  0  0  0            999 V2000
    0.7145    1.2375    0.0000 C   0  0  0  0  0  0  0  0  0  0  0  0
    1.4289    0.8250    0.0000 C   0  0  0  0  0  0  0  0  0  0  0  0
    1.4289   -0.0000    0.0000 C   0  0  0  0  0  0  0  0  0  0  0  0
    0.7145   -0.4125    0.0000 C   0  0  0  0  0  0  0  0  0  0  0  0
    0.0000    0.0000    0.0000 C   0  0  0  0  0  0  0  0  0  0  0  0
    0.0000    0.8250    0.0000 C   0  0  0  0  0  0  0  0  0  0  0  0
   -0.7145    1.2375    0.0000 N   0  0  0  0  0  0  0  0  0  0  0  0
    2.1434   -0.4125    0.0000 Cl  0  0  0  0  0  0  0  0  0  0  0  0
    0.7145    2.0625    0.0000 H   0  0  0  0  0  0  0  0  0  0  0  0
    2.1434    1.2375    0.0000 H   0  0  0  0  0  0  0  0  0  0  0  0
    0.7145   -1.2375    0.0000 H   0  0  0  0  0  0  0  0  0  0  0  0
   -0.7145   -0.4125    0.0000 H   0  0  0  0  0  0  0  0  0  0  0  0
   -0.7145    2.0625    0.0000 H   0  0  0  0  0  0  0  0  0  0  0  0
   -1.4289    0.8250    0.0000 H   0  0  0  0  0  0  0  0  0  0  0  0
  1  2  4  0  0  0  0
  2  3  4  0  0  0  0
  3  4  4  0  0  0  0
  4  5  4  0  0  0  0
  5  6  4  0  0  0  0
  1  6  4  0  0  0  0
  6  7  1  0  0  0  0
  3  8  1  0  0  0  0
  1  9  1  0  0  0  0
  2 10  1  0  0  0  0
  4 11  1  0  0  0  0
  5 12  1  0  0  0  0
  7 13  1  0  0  0  0
  7 14  1  0  0  0  0
M  END
$$$$
82
  Mrv0541 12152312282D          

 20 19  0  0  0  0            999 V2000
    1.0461    1.4289    0.0000 C   0  0  0  0  0  0  0  0  0  0  0  0
    1.7605    1.8414    0.0000 O   0  0  0  0  0  0  0  0  0  0  0  0
    2.4750    1.4289    0.0000 C   0  0  0  0  0  0  0  0  0  0  0  0
    2.4750    0.6039    0.0000 O   0  0  0  0  0  0  0  0  0  0  0  0
    3.1895    1.8414    0.0000 C   0  0  0  0  0  0  0  0  0  0  0  0
    3.9039    1.4289    0.0000 C   0  0  0  0  0  0  0  0  0  0  0  0
    4.6184    1.8414    0.0000 C   0  0  0  0  0  0  0  0  0  0  0  0
    4.6184    2.6664    0.0000 O   0  0  0  0  0  0  0  0  0  0  0  0
    5.3329    1.4289    0.0000 O   0  0  0  0  0  0  0  0  0  0  0  0
    6.0474    1.8414    0.0000 C   0  0  0  0  0  0  0  0  0  0  0  0
    0.6336    2.1434    0.0000 H   0  0  0  0  0  0  0  0  0  0  0  0
    0.3316    1.0164    0.0000 H   0  0  0  0  0  0  0  0  0  0  0  0
    1.4586    0.7145    0.0000 H   0  0  0  0  0  0  0  0  0  0  0  0
    2.8022    2.5699    0.0000 H   0  0  0  0  0  0  0  0  0  0  0  0
    3.5768    2.5699    0.0000 H   0  0  0  0  0  0  0  0  0  0  0  0
    3.5166    0.7005    0.0000 H   0  0  0  0  0  0  0  0  0  0  0  0
    4.2913    0.7005    0.0000 H   0  0  0  0  0  0  0  0  0  0  0  0
    6.4599    1.1270    0.0000 H   0  0  0  0  0  0  0  0  0  0  0  0
    6.7618    2.2539    0.0000 H   0  0  0  0  0  0  0  0  0  0  0  0
    5.6349    2.5559    0.0000 H   0  0  0  0  0  0  0  0  0  0  0  0
  1  2  1  0  0  0  0
  2  3  1  0  0  0  0
  3  4  2  0  0  0  0
  3  5  1  0  0  0  0
  5  6  1  0  0  0  0
  6  7  1  0  0  0  0
  7  8  2  0  0  0  0
  7  9  1  0  0  0  0
  9 10  1  0  0  0  0
  1 11  1  0  0  0  0
  1 12  1  0  0  0  0
  1 13  1  0  0  0  0
  5 14  1  0  0  0  0
  5 15  1  0  0  0  0
  6 16  1  0  0  0  0
  6 17  1  0  0  0  0
 10 18  1  0  0  0  0
 10 19  1  0  0  0  0
 10 20  1  0  0  0  0
M  END
$$$$
83
  Mrv0541 12152312282D          

 22 24  0  0  0  0            999 V2000
    1.9053    0.8250    0.0000 C   0  0  0  0  0  0  0  0  0  0  0  0
    1.1908    0.4125    0.0000 C   0  0  0  0  0  0  0  0  0  0  0  0
    0.4763    0.8250    0.0000 C   0  0  0  0  0  0  0  0  0  0  0  0
    0.4763    1.6500    0.0000 C   0  0  0  0  0  0  0  0  0  0  0  0
   -0.2382    1.2375    0.0000 O   0  0  0  0  0  0  0  0  0  0  0  0
    1.1908    2.0625    0.0000 C   0  0  0  0  0  0  0  0  0  0  0  0
    1.9053    1.6500    0.0000 C   0  0  0  0  0  0  0  0  0  0  0  0
    2.6197    2.0625    0.0000 C   0  0  0  0  0  0  0  0  0  0  0  0
    3.0322    2.7770    0.0000 C   0  0  0  0  0  0  0  0  0  0  0  0
    3.4447    2.0625    0.0000 O   0  0  0  0  0  0  0  0  0  0  0  0
    2.3424    0.1254    0.0000 H   0  0  0  0  0  0  0  0  0  0  0  0
    2.7298    0.7962    0.0000 H   0  0  0  0  0  0  0  0  0  0  0  0
    1.5781   -0.3159    0.0000 H   0  0  0  0  0  0  0  0  0  0  0  0
    0.8035   -0.3159    0.0000 H   0  0  0  0  0  0  0  0  0  0  0  0
    0.0638    0.1105    0.0000 H   0  0  0  0  0  0  0  0  0  0  0  0
    0.0638    2.3645    0.0000 H   0  0  0  0  0  0  0  0  0  0  0  0
    0.8035    2.7909    0.0000 H   0  0  0  0  0  0  0  0  0  0  0  0
    1.5781    2.7909    0.0000 H   0  0  0  0  0  0  0  0  0  0  0  0
    1.6231    2.4252    0.0000 H   0  0  0  0  0  0  0  0  0  0  0  0
    2.2711    2.8102    0.0000 H   0  0  0  0  0  0  0  0  0  0  0  0
    2.5590    3.4528    0.0000 H   0  0  0  0  0  0  0  0  0  0  0  0
    3.5054    3.4528    0.0000 H   0  0  0  0  0  0  0  0  0  0  0  0
  1  2  1  0  0  0  0
  2  3  1  0  0  0  0
  3  4  1  0  0  0  0
  4  5  1  0  0  0  0
  3  5  1  0  0  0  0
  4  6  1  0  0  0  0
  6  7  1  0  0  0  0
  1  7  1  0  0  0  0
  7  8  1  0  0  0  0
  8  9  1  0  0  0  0
  9 10  1  0  0  0  0
  8 10  1  0  0  0  0
  1 11  1  0  0  0  0
  1 12  1  0  0  0  0
  2 13  1  0  0  0  0
  2 14  1  0  0  0  0
  3 15  1  0  0  0  0
  4 16  1  0  0  0  0
  6 17  1  0  0  0  0
  6 18  1  0  0  0  0
  7 19  1  0  0  0  0
  8 20  1  0  0  0  0
  9 21  1  0  0  0  0
  9 22  1  0  0  0  0
M  END
$$$$
84
  Mrv0541 12152312282D          

 10  9  0  0  0  0            999 V2000
    2.0625   -0.7145    0.0000 C   0  0  0  0  0  0  0  0  0  0  0  0
    1.2375   -0.7145    0.0000 C   0  0  0  0  0  0  0  0  0  0  0  0
    0.8250    0.0000    0.0000 C   0  0  0  0  0  0  0  0  0  0  0  0
    0.0000    0.0000    0.0000 C   0  0  0  0  0  0  0  0  0  0  0  0
    2.4750   -1.4289    0.0000 H   0  0  0  0  0  0  0  0  0  0  0  0
    2.4750   -0.0000    0.0000 H   0  0  0  0  0  0  0  0  0  0  0  0
    0.8250   -1.4289    0.0000 H   0  0  0  0  0  0  0  0  0  0  0  0
    1.2375    0.7145    0.0000 H   0  0  0  0  0  0  0  0  0  0  0  0
   -0.4125    0.7145    0.0000 H   0  0  0  0  0  0  0  0  0  0  0  0
   -0.4125   -0.7145    0.0000 H   0  0  0  0  0  0  0  0  0  0  0  0
  1  2  2  0  0  0  0
  2  3  1  0  0  0  0
  3  4  2  0  0  0  0
  1  5  1  0  0  0  0
  1  6  1  0  0  0  0
  2  7  1  0  0  0  0
  3  8  1  0  0  0  0
  4  9  1  0  0  0  0
  4 10  1  0  0  0  0
M  END
$$$$
85
  Mrv0541 12152312282D          

  8  7  0  0  0  0            999 V2000
    0.8250    0.0000    0.0000 C   0  0  0  0  0  0  0  0  0  0  0  0
    1.2375   -0.7145    0.0000 C   0  0  0  0  0  0  0  0  0  0  0  0
    2.0625   -0.7145    0.0000 Cl  0  0  0  0  0  0  0  0  0  0  0  0
    0.0000    0.0000    0.0000 Cl  0  0  0  0  0  0  0  0  0  0  0  0
    1.5246    0.4372    0.0000 H   0  0  0  0  0  0  0  0  0  0  0  0
    0.8538    0.8245    0.0000 H   0  0  0  0  0  0  0  0  0  0  0  0
    0.5379   -1.1517    0.0000 H   0  0  0  0  0  0  0  0  0  0  0  0
    1.2087   -1.5390    0.0000 H   0  0  0  0  0  0  0  0  0  0  0  0
  1  2  1  0  0  0  0
  2  3  1  0  0  0  0
  1  4  1  0  0  0  0
  1  5  1  0  0  0  0
  1  6  1  0  0  0  0
  2  7  1  0  0  0  0
  2  8  1  0  0  0  0
M  END
$$$$
86
  Mrv0541 12152312282D          

  7  6  0  0  0  0            999 V2000
    2.0625   -0.7145    0.0000 C   0  0  0  0  0  0  0  0  0  0  0  0
    1.6500   -0.0000    0.0000 C   0  0  0  0  0  0  0  0  0  0  0  0
    0.8250    0.0000    0.0000 C   0  0  0  0  0  0  0  0  0  0  0  0
    0.0000    0.0000    0.0000 N   0  0  0  0  0  0  0  0  0  0  0  0
    1.6500   -1.4289    0.0000 H   0  0  0  0  0  0  0  0  0  0  0  0
    2.8875   -0.7145    0.0000 H   0  0  0  0  0  0  0  0  0  0  0  0
    2.0625    0.7145    0.0000 H   0  0  0  0  0  0  0  0  0  0  0  0
  1  2  2  0  0  0  0
  2  3  1  0  0  0  0
  3  4  3  0  0  0  0
  1  5  1  0  0  0  0
  1  6  1  0  0  0  0
  2  7  1  0  0  0  0
M  END
$$$$
87
  Mrv0541 12152312282D          

 26 25  0  0  0  0            999 V2000
    5.8559    2.5559    0.0000 C   0  0  0  0  0  0  0  0  0  0  0  0
    5.1414    2.1434    0.0000 C   0  0  0  0  0  0  0  0  0  0  0  0
    4.4270    2.5559    0.0000 C   0  0  0  0  0  0  0  0  0  0  0  0
    3.7125    2.1434    0.0000 C   0  0  0  0  0  0  0  0  0  0  0  0
    3.7125    1.3184    0.0000 O   0  0  0  0  0  0  0  0  0  0  0  0
    2.9980    2.5559    0.0000 N   0  0  0  0  0  0  0  0  0  0  0  0
    2.2836    2.1434    0.0000 N   0  0  0  0  0  0  0  0  0  0  0  0
    6.5704    2.1434    0.0000 C   0  0  0  0  0  0  0  0  0  0  0  0
    7.2849    2.5559    0.0000 C   0  0  0  0  0  0  0  0  0  0  0  0
    7.2849    3.3809    0.0000 O   0  0  0  0  0  0  0  0  0  0  0  0
    7.9993    2.1434    0.0000 N   0  0  0  0  0  0  0  0  0  0  0  0
    8.7138    2.5559    0.0000 N   0  0  0  0  0  0  0  0  0  0  0  0
    5.4686    3.2843    0.0000 H   0  0  0  0  0  0  0  0  0  0  0  0
    6.2432    3.2843    0.0000 H   0  0  0  0  0  0  0  0  0  0  0  0
    5.5288    1.4150    0.0000 H   0  0  0  0  0  0  0  0  0  0  0  0
    4.7541    1.4150    0.0000 H   0  0  0  0  0  0  0  0  0  0  0  0
    4.8143    3.2843    0.0000 H   0  0  0  0  0  0  0  0  0  0  0  0
    4.0397    3.2843    0.0000 H   0  0  0  0  0  0  0  0  0  0  0  0
    2.9980    3.3809    0.0000 H   0  0  0  0  0  0  0  0  0  0  0  0
    1.5691    2.5559    0.0000 H   0  0  0  0  0  0  0  0  0  0  0  0
    2.2836    1.3184    0.0000 H   0  0  0  0  0  0  0  0  0  0  0  0
    6.1831    1.4150    0.0000 H   0  0  0  0  0  0  0  0  0  0  0  0
    6.9577    1.4150    0.0000 H   0  0  0  0  0  0  0  0  0  0  0  0
    7.9993    1.3184    0.0000 H   0  0  0  0  0  0  0  0  0  0  0  0
    9.4283    2.1434    0.0000 H   0  0  0  0  0  0  0  0  0  0  0  0
    8.7138    3.3809    0.0000 H   0  0  0  0  0  0  0  0  0  0  0  0
  1  2  1  0  0  0  0
  2  3  1  0  0  0  0
  3  4  1  0  0  0  0
  4  5  2  0  0  0  0
  4  6  1  0  0  0  0
  6  7  1  0  0  0  0
  1  8  1  0  0  0  0
  8  9  1  0  0  0  0
  9 10  2  0  0  0  0
  9 11  1  0  0  0  0
 11 12  1  0  0  0  0
  1 13  1  0  0  0  0
  1 14  1  0  0  0  0
  2 15  1  0  0  0  0
  2 16  1  0  0  0  0
  3 17  1  0  0  0  0
  3 18  1  0  0  0  0
  6 19  1  0  0  0  0
  7 20  1  0  0  0  0
  7 21  1  0  0  0  0
  8 22  1  0  0  0  0
  8 23  1  0  0  0  0
 11 24  1  0  0  0  0
 12 25  1  0  0  0  0
 12 26  1  0  0  0  0
M  END
$$$$
88
  Mrv0541 12152312282D          

 39 42  0  0  0  0            999 V2000
    0.7145   -1.2375    0.0000 C   0  0  0  0  0  0  0  0  0  0  0  0
    0.7145   -0.4125    0.0000 C   0  0  0  0  0  0  0  0  0  0  0  0
    1.4289    0.0000    0.0000 O   0  0  0  0  0  0  0  0  0  0  0  0
    2.1434   -0.4125    0.0000 C   0  0  0  0  0  0  0  0  0  0  0  0
    2.8579    0.0000    0.0000 C   0  0  0  0  0  0  0  0  0  0  0  0
    3.5724   -0.4125    0.0000 C   0  0  0  0  0  0  0  0  0  0  0  0
    3.5724   -1.2375    0.0000 C   0  0  0  0  0  0  0  0  0  0  0  0
    2.8579   -1.6500    0.0000 C   0  0  0  0  0  0  0  0  0  0  0  0
    2.1434   -1.2375    0.0000 C   0  0  0  0  0  0  0  0  0  0  0  0
    1.4289   -1.6500    0.0000 O   0  0  0  0  0  0  0  0  0  0  0  0
    0.0000    0.0000    0.0000 C   0  0  0  0  0  0  0  0  0  0  0  0
    0.0000    0.8250    0.0000 O   0  0  0  0  0  0  0  0  0  0  0  0
   -0.7145   -0.4125    0.0000 N   0  0  0  0  0  0  0  0  0  0  0  0
   -1.4289   -0.0000    0.0000 C   0  0  0  0  0  0  0  0  0  0  0  0
   -2.1434   -0.4125    0.0000 C   0  0  0  0  0  0  0  0  0  0  0  0
   -2.8579   -0.0000    0.0000 C   0  0  0  0  0  0  0  0  0  0  0  0
   -2.8579    0.8250    0.0000 C   0  0  0  0  0  0  0  0  0  0  0  0
   -2.1434    1.2375    0.0000 C   0  0  0  0  0  0  0  0  0  0  0  0
   -1.4289    0.8250    0.0000 C   0  0  0  0  0  0  0  0  0  0  0  0
   -3.5724    1.2375    0.0000 C   0  0  0  0  0  0  0  0  0  0  0  0
   -4.3260    0.9019    0.0000 C   0  0  0  0  0  0  0  0  0  0  0  0
   -4.8781    1.5150    0.0000 N   0  0  0  0  0  0  0  0  0  0  0  0
   -4.4656    2.2295    0.0000 N   0  0  0  0  0  0  0  0  0  0  0  0
   -3.6586    2.0580    0.0000 C   0  0  0  0  0  0  0  0  0  0  0  0
   -0.1100   -1.2663    0.0000 H   0  0  0  0  0  0  0  0  0  0  0  0
    0.2773   -1.9371    0.0000 H   0  0  0  0  0  0  0  0  0  0  0  0
    0.0000   -0.8250    0.0000 H   0  0  0  0  0  0  0  0  0  0  0  0
    2.8579    0.8250    0.0000 H   0  0  0  0  0  0  0  0  0  0  0  0
    4.2868   -0.0000    0.0000 H   0  0  0  0  0  0  0  0  0  0  0  0
    4.2868   -1.6500    0.0000 H   0  0  0  0  0  0  0  0  0  0  0  0
    2.8579   -2.4750    0.0000 H   0  0  0  0  0  0  0  0  0  0  0  0
   -0.7145   -1.2375    0.0000 H   0  0  0  0  0  0  0  0  0  0  0  0
   -2.1434   -1.2375    0.0000 H   0  0  0  0  0  0  0  0  0  0  0  0
   -3.5724   -0.4125    0.0000 H   0  0  0  0  0  0  0  0  0  0  0  0
   -2.1434    2.0625    0.0000 H   0  0  0  0  0  0  0  0  0  0  0  0
   -0.7145    1.2375    0.0000 H   0  0  0  0  0  0  0  0  0  0  0  0
   -4.4976    0.0950    0.0000 H   0  0  0  0  0  0  0  0  0  0  0  0
   -5.6985    1.4288    0.0000 H   0  0  0  0  0  0  0  0  0  0  0  0
   -3.0455    2.6100    0.0000 H   0  0  0  0  0  0  0  0  0  0  0  0
  1  2  1  0  0  0  0
  2  3  1  0  0  0  0
  3  4  1  0  0  0  0
  4  5  4  0  0  0  0
  5  6  4  0  0  0  0
  6  7  4  0  0  0  0
  7  8  4  0  0  0  0
  8  9  4  0  0  0  0
  4  9  4  0  0  0  0
  9 10  1  0  0  0  0
  1 10  1  0  0  0  0
  2 11  1  0  0  0  0
 11 12  2  0  0  0  0
 11 13  1  0  0  0  0
 13 14  1  0  0  0  0
 14 15  4  0  0  0  0
 15 16  4  0  0  0  0
 16 17  4  0  0  0  0
 17 18  4  0  0  0  0
 18 19  4  0  0  0  0
 14 19  4  0  0  0  0
 17 20  1  0  0  0  0
 20 21  4  0  0  0  0
 21 22  4  0  0  0  0
 22 23  4  0  0  0  0
 23 24  4  0  0  0  0
 20 24  4  0  0  0  0
  1 25  1  0  0  0  0
  1 26  1  0  0  0  0
  2 27  1  0  0  0  0
  5 28  1  0  0  0  0
  6 29  1  0  0  0  0
  7 30  1  0  0  0  0
  8 31  1  0  0  0  0
 13 32  1  0  0  0  0
 15 33  1  0  0  0  0
 16 34  1  0  0  0  0
 18 35  1  0  0  0  0
 19 36  1  0  0  0  0
 21 37  1  0  0  0  0
 22 38  1  0  0  0  0
 24 39  1  0  0  0  0
M  END
$$$$
89
  Mrv0541 12152312282D          

 54 57  0  0  0  0            999 V2000
   -1.4289   -6.6000    0.0000 C   0  0  0  0  0  0  0  0  0  0  0  0
   -0.7145   -6.1875    0.0000 N   0  0  0  0  0  0  0  0  0  0  0  0
    0.0000   -6.6000    0.0000 C   0  0  0  0  0  0  0  0  0  0  0  0
   -0.7145   -5.3625    0.0000 C   0  0  0  0  0  0  0  0  0  0  0  0
    0.0000   -4.9500    0.0000 C   0  0  0  0  0  0  0  0  0  0  0  0
    0.0000   -4.1250    0.0000 O   0  0  0  0  0  0  0  0  0  0  0  0
    0.7145   -3.7125    0.0000 C   0  0  0  0  0  0  0  0  0  0  0  0
    0.7145   -2.8875    0.0000 C   0  0  0  0  0  0  0  0  0  0  0  0
    1.4289   -2.4750    0.0000 C   0  0  0  0  0  0  0  0  0  0  0  0
    2.1434   -2.8875    0.0000 C   0  0  0  0  0  0  0  0  0  0  0  0
    2.1434   -3.7125    0.0000 C   0  0  0  0  0  0  0  0  0  0  0  0
    1.4289   -4.1250    0.0000 C   0  0  0  0  0  0  0  0  0  0  0  0
    2.8579   -4.1250    0.0000 C   0  0  0  0  0  0  0  0  0  0  0  0
    3.6116   -3.7894    0.0000 C   0  0  0  0  0  0  0  0  0  0  0  0
    4.1636   -4.4025    0.0000 N   0  0  0  0  0  0  0  0  0  0  0  0
    3.7511   -5.1170    0.0000 N   0  0  0  0  0  0  0  0  0  0  0  0
    2.9441   -4.9455    0.0000 C   0  0  0  0  0  0  0  0  0  0  0  0
    0.0000   -2.4750    0.0000 N   0  0  0  0  0  0  0  0  0  0  0  0
    0.0000   -1.6500    0.0000 C   0  0  0  0  0  0  0  0  0  0  0  0
   -0.7145   -1.2375    0.0000 O   0  0  0  0  0  0  0  0  0  0  0  0
    0.7145   -1.2375    0.0000 C   0  0  0  0  0  0  0  0  0  0  0  0
    0.7145   -0.4125    0.0000 C   0  0  0  0  0  0  0  0  0  0  0  0
    1.4289    0.0000    0.0000 O   0  0  0  0  0  0  0  0  0  0  0  0
    2.1434   -0.4125    0.0000 C   0  0  0  0  0  0  0  0  0  0  0  0
    2.8579    0.0000    0.0000 C   0  0  0  0  0  0  0  0  0  0  0  0
    3.5724   -0.4125    0.0000 C   0  0  0  0  0  0  0  0  0  0  0  0
    3.5724   -1.2375    0.0000 C   0  0  0  0  0  0  0  0  0  0  0  0
    2.8579   -1.6500    0.0000 C   0  0  0  0  0  0  0  0  0  0  0  0
    2.1434   -1.2375    0.0000 C   0  0  0  0  0  0  0  0  0  0  0  0
    1.4289   -1.6500    0.0000 O   0  0  0  0  0  0  0  0  0  0  0  0
   -1.8414   -5.8855    0.0000 H   0  0  0  0  0  0  0  0  0  0  0  0
   -2.1434   -7.0125    0.0000 H   0  0  0  0  0  0  0  0  0  0  0  0
   -1.0164   -7.3145    0.0000 H   0  0  0  0  0  0  0  0  0  0  0  0
   -0.4125   -7.3145    0.0000 H   0  0  0  0  0  0  0  0  0  0  0  0
    0.7145   -7.0125    0.0000 H   0  0  0  0  0  0  0  0  0  0  0  0
    0.1433   -5.7875    0.0000 H   0  0  0  0  0  0  0  0  0  0  0  0
   -1.5390   -5.3337    0.0000 H   0  0  0  0  0  0  0  0  0  0  0  0
   -1.1517   -4.6629    0.0000 H   0  0  0  0  0  0  0  0  0  0  0  0
    0.6501   -5.4579    0.0000 H   0  0  0  0  0  0  0  0  0  0  0  0
    0.8245   -4.9788    0.0000 H   0  0  0  0  0  0  0  0  0  0  0  0
    1.7111   -1.6998    0.0000 H   0  0  0  0  0  0  0  0  0  0  0  0
    2.6737   -2.2555    0.0000 H   0  0  0  0  0  0  0  0  0  0  0  0
    1.4289   -4.9500    0.0000 H   0  0  0  0  0  0  0  0  0  0  0  0
    3.7831   -2.9825    0.0000 H   0  0  0  0  0  0  0  0  0  0  0  0
    4.9841   -4.3163    0.0000 H   0  0  0  0  0  0  0  0  0  0  0  0
    2.3310   -5.4975    0.0000 H   0  0  0  0  0  0  0  0  0  0  0  0
   -0.7145   -2.8875    0.0000 H   0  0  0  0  0  0  0  0  0  0  0  0
    0.0000   -0.8250    0.0000 H   0  0  0  0  0  0  0  0  0  0  0  0
   -0.1100   -0.3837    0.0000 H   0  0  0  0  0  0  0  0  0  0  0  0
    0.2773    0.2871    0.0000 H   0  0  0  0  0  0  0  0  0  0  0  0
    2.8579    0.8250    0.0000 H   0  0  0  0  0  0  0  0  0  0  0  0
    4.2868   -0.0000    0.0000 H   0  0  0  0  0  0  0  0  0  0  0  0
    4.2868   -1.6500    0.0000 H   0  0  0  0  0  0  0  0  0  0  0  0
    2.8579   -2.4750    0.0000 H   0  0  0  0  0  0  0  0  0  0  0  0
  1  2  1  0  0  0  0
  2  3  1  0  0  0  0
  2  4  1  0  0  0  0
  4  5  1  0  0  0  0
  5  6  1  0  0  0  0
  6  7  1  0  0  0  0
  7  8  4  0  0  0  0
  8  9  4  0  0  0  0
  9 10  4  0  0  0  0
 10 11  4  0  0  0  0
 11 12  4  0  0  0  0
  7 12  4  0  0  0  0
 11 13  1  0  0  0  0
 13 14  4  0  0  0  0
 14 15  4  0  0  0  0
 15 16  4  0  0  0  0
 16 17  4  0  0  0  0
 13 17  4  0  0  0  0
  8 18  1  0  0  0  0
 18 19  1  0  0  0  0
 19 20  2  0  0  0  0
 19 21  1  0  0  0  0
 21 22  1  0  0  0  0
 22 23  1  0  0  0  0
 23 24  1  0  0  0  0
 24 25  4  0  0  0  0
 25 26  4  0  0  0  0
 26 27  4  0  0  0  0
 27 28  4  0  0  0  0
 28 29  4  0  0  0  0
 24 29  4  0  0  0  0
 29 30  1  0  0  0  0
 21 30  1  0  0  0  0
  1 31  1  0  0  0  0
  1 32  1  0  0  0  0
  1 33  1  0  0  0  0
  3 34  1  0  0  0  0
  3 35  1  0  0  0  0
  3 36  1  0  0  0  0
  4 37  1  0  0  0  0
  4 38  1  0  0  0  0
  5 39  1  0  0  0  0
  5 40  1  0  0  0  0
  9 41  1  0  0  0  0
 10 42  1  0  0  0  0
 12 43  1  0  0  0  0
 14 44  1  0  0  0  0
 15 45  1  0  0  0  0
 17 46  1  0  0  0  0
 18 47  1  0  0  0  0
 21 48  1  0  0  0  0
 22 49  1  0  0  0  0
 22 50  1  0  0  0  0
 25 51  1  0  0  0  0
 26 52  1  0  0  0  0
 27 53  1  0  0  0  0
 28 54  1  0  0  0  0
M  END
$$$$
90
  Mrv0541 12152312282D          

 43 44  0  0  0  0            999 V2000
   -1.1759    1.0885    0.0000 C   0  0  0  0  0  0  0  0  0  0  0  0
   -1.8904    1.5010    0.0000 C   0  0  0  0  0  0  0  0  0  0  0  0
   -2.6048    1.9135    0.0000 C   0  0  0  0  0  0  0  0  0  0  0  0
   -1.4779    2.2155    0.0000 C   0  0  0  0  0  0  0  0  0  0  0  0
   -2.3029    0.7865    0.0000 C   0  0  0  0  0  0  0  0  0  0  0  0
   -2.7154    0.0721    0.0000 C   0  0  0  0  0  0  0  0  0  0  0  0
   -3.5404    0.0721    0.0000 C   0  0  0  0  0  0  0  0  0  0  0  0
   -3.9529   -0.6424    0.0000 C   0  0  0  0  0  0  0  0  0  0  0  0
   -3.5404   -1.3569    0.0000 C   0  0  0  0  0  0  0  0  0  0  0  0
   -3.9529   -2.0714    0.0000 C   0  0  0  0  0  0  0  0  0  0  0  0
   -4.7779   -2.0714    0.0000 C   0  0  0  0  0  0  0  0  0  0  0  0
   -5.1904   -1.3569    0.0000 C   0  0  0  0  0  0  0  0  0  0  0  0
   -4.7779   -0.6424    0.0000 C   0  0  0  0  0  0  0  0  0  0  0  0
   -5.1904   -2.7858    0.0000 Cl  0  0  0  0  0  0  0  0  0  0  0  0
   -1.5884    0.3740    0.0000 C   0  0  0  0  0  0  0  0  0  0  0  0
   -1.5884   -0.4510    0.0000 N   0  0  0  0  0  0  0  0  0  0  0  0
   -0.9210   -0.9359    0.0000 C   0  0  0  0  0  0  0  0  0  0  0  0
   -1.1759   -1.7205    0.0000 N   0  0  0  0  0  0  0  0  0  0  0  0
   -2.0009   -1.7205    0.0000 C   0  0  0  0  0  0  0  0  0  0  0  0
   -2.2558   -0.9359    0.0000 N   0  0  0  0  0  0  0  0  0  0  0  0
   -3.0173    1.1990    0.0000 O   0  0  0  0  0  0  0  0  0  0  0  0
   -1.3192    0.2760    0.0000 H   0  0  0  0  0  0  0  0  0  0  0  0
   -0.4614    0.6760    0.0000 H   0  0  0  0  0  0  0  0  0  0  0  0
   -1.0326    1.9010    0.0000 H   0  0  0  0  0  0  0  0  0  0  0  0
   -2.4616    2.7260    0.0000 H   0  0  0  0  0  0  0  0  0  0  0  0
   -3.3193    2.3260    0.0000 H   0  0  0  0  0  0  0  0  0  0  0  0
   -2.7481    1.1010    0.0000 H   0  0  0  0  0  0  0  0  0  0  0  0
   -0.6654    2.0722    0.0000 H   0  0  0  0  0  0  0  0  0  0  0  0
   -1.0654    2.9299    0.0000 H   0  0  0  0  0  0  0  0  0  0  0  0
   -2.2903    2.3587    0.0000 H   0  0  0  0  0  0  0  0  0  0  0  0
   -2.0157   -0.3651    0.0000 H   0  0  0  0  0  0  0  0  0  0  0  0
   -2.6866   -0.7524    0.0000 H   0  0  0  0  0  0  0  0  0  0  0  0
   -3.5692    0.8965    0.0000 H   0  0  0  0  0  0  0  0  0  0  0  0
   -4.2400    0.5092    0.0000 H   0  0  0  0  0  0  0  0  0  0  0  0
   -2.7154   -1.3569    0.0000 H   0  0  0  0  0  0  0  0  0  0  0  0
   -3.5404   -2.7858    0.0000 H   0  0  0  0  0  0  0  0  0  0  0  0
   -6.0154   -1.3569    0.0000 H   0  0  0  0  0  0  0  0  0  0  0  0
   -5.1904    0.0721    0.0000 H   0  0  0  0  0  0  0  0  0  0  0  0
   -0.9383    0.8819    0.0000 H   0  0  0  0  0  0  0  0  0  0  0  0
   -0.7639    0.4028    0.0000 H   0  0  0  0  0  0  0  0  0  0  0  0
   -0.1363   -0.6810    0.0000 H   0  0  0  0  0  0  0  0  0  0  0  0
   -2.4858   -2.3880    0.0000 H   0  0  0  0  0  0  0  0  0  0  0  0
   -3.0173    2.0240    0.0000 H   0  0  0  0  0  0  0  0  0  0  0  0
  1  2  1  0  0  0  0
  2  3  1  0  0  0  0
  2  4  1  0  0  0  0
  2  5  1  0  0  0  0
  5  6  1  0  0  0  0
  6  7  1  0  0  0  0
  7  8  1  0  0  0  0
  8  9  4  0  0  0  0
  9 10  4  0  0  0  0
 10 11  4  0  0  0  0
 11 12  4  0  0  0  0
 12 13  4  0  0  0  0
  8 13  4  0  0  0  0
 11 14  1  0  0  0  0
  5 15  1  0  0  0  0
 15 16  1  0  0  0  0
 16 17  4  0  0  0  0
 17 18  4  0  0  0  0
 18 19  4  0  0  0  0
 19 20  4  0  0  0  0
 16 20  4  0  0  0  0
  5 21  1  0  0  0  0
  1 22  1  0  0  0  0
  1 23  1  0  0  0  0
  1 24  1  0  0  0  0
  3 25  1  0  0  0  0
  3 26  1  0  0  0  0
  3 27  1  0  0  0  0
  4 28  1  0  0  0  0
  4 29  1  0  0  0  0
  4 30  1  0  0  0  0
  6 31  1  0  0  0  0
  6 32  1  0  0  0  0
  7 33  1  0  0  0  0
  7 34  1  0  0  0  0
  9 35  1  0  0  0  0
 10 36  1  0  0  0  0
 12 37  1  0  0  0  0
 13 38  1  0  0  0  0
 15 39  1  0  0  0  0
 15 40  1  0  0  0  0
 17 41  1  0  0  0  0
 19 42  1  0  0  0  0
 21 43  1  0  0  0  0
M  END
$$$$
91
  Mrv0541 12152312282D          

 17 17  0  0  0  0            999 V2000
    0.7145    2.0625    0.0000 C   0  0  0  0  0  0  0  0  0  0  0  0
    0.7145    1.2375    0.0000 C   0  0  0  0  0  0  0  0  0  0  0  0
    1.4289    0.8250    0.0000 C   0  0  0  0  0  0  0  0  0  0  0  0
    1.4289   -0.0000    0.0000 C   0  0  0  0  0  0  0  0  0  0  0  0
    0.7145   -0.4125    0.0000 C   0  0  0  0  0  0  0  0  0  0  0  0
    0.0000    0.0000    0.0000 C   0  0  0  0  0  0  0  0  0  0  0  0
    0.0000    0.8250    0.0000 C   0  0  0  0  0  0  0  0  0  0  0  0
    2.1434   -0.4125    0.0000 N   0  0  0  0  0  0  0  0  0  0  0  0
    1.5395    2.0625    0.0000 H   0  0  0  0  0  0  0  0  0  0  0  0
    0.7145    2.8875    0.0000 H   0  0  0  0  0  0  0  0  0  0  0  0
   -0.1105    2.0625    0.0000 H   0  0  0  0  0  0  0  0  0  0  0  0
    2.1434    1.2375    0.0000 H   0  0  0  0  0  0  0  0  0  0  0  0
    0.7145   -1.2375    0.0000 H   0  0  0  0  0  0  0  0  0  0  0  0
   -0.7145   -0.4125    0.0000 H   0  0  0  0  0  0  0  0  0  0  0  0
   -0.7145    1.2375    0.0000 H   0  0  0  0  0  0  0  0  0  0  0  0
    2.1434   -1.2375    0.0000 H   0  0  0  0  0  0  0  0  0  0  0  0
    2.8579   -0.0000    0.0000 H   0  0  0  0  0  0  0  0  0  0  0  0
  1  2  1  0  0  0  0
  2  3  4  0  0  0  0
  3  4  4  0  0  0  0
  4  5  4  0  0  0  0
  5  6  4  0  0  0  0
  6  7  4  0  0  0  0
  2  7  4  0  0  0  0
  4  8  1  0  0  0  0
  1  9  1  0  0  0  0
  1 10  1  0  0  0  0
  1 11  1  0  0  0  0
  3 12  1  0  0  0  0
  5 13  1  0  0  0  0
  6 14  1  0  0  0  0
  7 15  1  0  0  0  0
  8 16  1  0  0  0  0
  8 17  1  0  0  0  0
M  END
$$$$
92
  Mrv0541 12152312282D          

 16 16  0  0  0  0            999 V2000
    0.7145    1.2375    0.0000 C   0  0  0  0  0  0  0  0  0  0  0  0
    1.4289    0.8250    0.0000 C   0  0  0  0  0  0  0  0  0  0  0  0
    1.4289   -0.0000    0.0000 C   0  0  0  0  0  0  0  0  0  0  0  0
    0.7145   -0.4125    0.0000 C   0  0  0  0  0  0  0  0  0  0  0  0
    0.0000    0.0000    0.0000 C   0  0  0  0  0  0  0  0  0  0  0  0
    0.0000    0.8250    0.0000 C   0  0  0  0  0  0  0  0  0  0  0  0
   -0.7145   -0.4125    0.0000 N   0  0  0  0  0  0  0  0  0  0  0  0
    2.1434   -0.4125    0.0000 N   0  0  0  0  0  0  0  0  0  0  0  0
    0.7145    2.0625    0.0000 H   0  0  0  0  0  0  0  0  0  0  0  0
    2.1434    1.2375    0.0000 H   0  0  0  0  0  0  0  0  0  0  0  0
    0.7145   -1.2375    0.0000 H   0  0  0  0  0  0  0  0  0  0  0  0
   -0.7145    1.2375    0.0000 H   0  0  0  0  0  0  0  0  0  0  0  0
   -1.4289    0.0000    0.0000 H   0  0  0  0  0  0  0  0  0  0  0  0
   -0.7145   -1.2375    0.0000 H   0  0  0  0  0  0  0  0  0  0  0  0
    2.1434   -1.2375    0.0000 H   0  0  0  0  0  0  0  0  0  0  0  0
    2.8579   -0.0000    0.0000 H   0  0  0  0  0  0  0  0  0  0  0  0
  1  2  4  0  0  0  0
  2  3  4  0  0  0  0
  3  4  4  0  0  0  0
  4  5  4  0  0  0  0
  5  6  4  0  0  0  0
  1  6  4  0  0  0  0
  5  7  1  0  0  0  0
  3  8  1  0  0  0  0
  1  9  1  0  0  0  0
  2 10  1  0  0  0  0
  4 11  1  0  0  0  0
  6 12  1  0  0  0  0
  7 13  1  0  0  0  0
  7 14  1  0  0  0  0
  8 15  1  0  0  0  0
  8 16  1  0  0  0  0
M  END
$$$$
93
  Mrv0541 12152312282D          

 14 14  0  0  0  0            999 V2000
    0.7145    1.2375    0.0000 C   0  0  0  0  0  0  0  0  0  0  0  0
    1.4289    0.8250    0.0000 C   0  0  0  0  0  0  0  0  0  0  0  0
    1.4289   -0.0000    0.0000 C   0  0  0  0  0  0  0  0  0  0  0  0
    0.7145   -0.4125    0.0000 C   0  0  0  0  0  0  0  0  0  0  0  0
    0.0000    0.0000    0.0000 C   0  0  0  0  0  0  0  0  0  0  0  0
    0.0000    0.8250    0.0000 C   0  0  0  0  0  0  0  0  0  0  0  0
   -0.7145   -0.4125    0.0000 O   0  0  0  0  0  0  0  0  0  0  0  0
    2.1434   -0.4125    0.0000 O   0  0  0  0  0  0  0  0  0  0  0  0
    0.7145    2.0625    0.0000 H   0  0  0  0  0  0  0  0  0  0  0  0
    2.1434    1.2375    0.0000 H   0  0  0  0  0  0  0  0  0  0  0  0
    0.7145   -1.2375    0.0000 H   0  0  0  0  0  0  0  0  0  0  0  0
   -0.7145    1.2375    0.0000 H   0  0  0  0  0  0  0  0  0  0  0  0
   -1.4289    0.0000    0.0000 H   0  0  0  0  0  0  0  0  0  0  0  0
    2.1434   -1.2375    0.0000 H   0  0  0  0  0  0  0  0  0  0  0  0
  1  2  4  0  0  0  0
  2  3  4  0  0  0  0
  3  4  4  0  0  0  0
  4  5  4  0  0  0  0
  5  6  4  0  0  0  0
  1  6  4  0  0  0  0
  5  7  1  0  0  0  0
  3  8  1  0  0  0  0
  1  9  1  0  0  0  0
  2 10  1  0  0  0  0
  4 11  1  0  0  0  0
  6 12  1  0  0  0  0
  7 13  1  0  0  0  0
  8 14  1  0  0  0  0
M  END
$$$$
94
  Mrv0541 12152312282D          

 15 15  0  0  0  0            999 V2000
    0.7145    2.0625    0.0000 C   0  0  0  0  0  0  0  0  0  0  0  0
    0.7145    1.2375    0.0000 C   0  0  0  0  0  0  0  0  0  0  0  0
    1.4289    0.8250    0.0000 C   0  0  0  0  0  0  0  0  0  0  0  0
    1.4289   -0.0000    0.0000 C   0  0  0  0  0  0  0  0  0  0  0  0
    0.7145   -0.4125    0.0000 C   0  0  0  0  0  0  0  0  0  0  0  0
    0.0000    0.0000    0.0000 C   0  0  0  0  0  0  0  0  0  0  0  0
    0.0000    0.8250    0.0000 C   0  0  0  0  0  0  0  0  0  0  0  0
    1.5395    2.0625    0.0000 H   0  0  0  0  0  0  0  0  0  0  0  0
    0.7145    2.8875    0.0000 H   0  0  0  0  0  0  0  0  0  0  0  0
   -0.1105    2.0625    0.0000 H   0  0  0  0  0  0  0  0  0  0  0  0
    2.1434    1.2375    0.0000 H   0  0  0  0  0  0  0  0  0  0  0  0
    2.1434   -0.4125    0.0000 H   0  0  0  0  0  0  0  0  0  0  0  0
    0.7145   -1.2375    0.0000 H   0  0  0  0  0  0  0  0  0  0  0  0
   -0.7145   -0.4125    0.0000 H   0  0  0  0  0  0  0  0  0  0  0  0
   -0.7145    1.2375    0.0000 H   0  0  0  0  0  0  0  0  0  0  0  0
  1  2  1  0  0  0  0
  2  3  4  0  0  0  0
  3  4  4  0  0  0  0
  4  5  4  0  0  0  0
  5  6  4  0  0  0  0
  6  7  4  0  0  0  0
  2  7  4  0  0  0  0
  1  8  1  0  0  0  0
  1  9  1  0  0  0  0
  1 10  1  0  0  0  0
  3 11  1  0  0  0  0
  4 12  1  0  0  0  0
  5 13  1  0  0  0  0
  6 14  1  0  0  0  0
  7 15  1  0  0  0  0
M  END
$$$$
95
  Mrv0541 12152312282D          

 12 12  0  0  0  0            999 V2000
    0.7145    1.2375    0.0000 C   0  0  0  0  0  0  0  0  0  0  0  0
    1.4289    0.8250    0.0000 C   0  0  0  0  0  0  0  0  0  0  0  0
    1.4289   -0.0000    0.0000 C   0  0  0  0  0  0  0  0  0  0  0  0
    0.7145   -0.4125    0.0000 C   0  0  0  0  0  0  0  0  0  0  0  0
    0.0000    0.0000    0.0000 C   0  0  0  0  0  0  0  0  0  0  0  0
    0.0000    0.8250    0.0000 C   0  0  0  0  0  0  0  0  0  0  0  0
    0.7145   -1.2375    0.0000 Cl  0  0  0  0  0  0  0  0  0  0  0  0
    0.7145    2.0625    0.0000 H   0  0  0  0  0  0  0  0  0  0  0  0
    2.1434    1.2375    0.0000 H   0  0  0  0  0  0  0  0  0  0  0  0
    2.1434   -0.4125    0.0000 H   0  0  0  0  0  0  0  0  0  0  0  0
   -0.7145   -0.4125    0.0000 H   0  0  0  0  0  0  0  0  0  0  0  0
   -0.7145    1.2375    0.0000 H   0  0  0  0  0  0  0  0  0  0  0  0
  1  2  4  0  0  0  0
  2  3  4  0  0  0  0
  3  4  4  0  0  0  0
  4  5  4  0  0  0  0
  5  6  4  0  0  0  0
  1  6  4  0  0  0  0
  4  7  1  0  0  0  0
  1  8  1  0  0  0  0
  2  9  1  0  0  0  0
  3 10  1  0  0  0  0
  5 11  1  0  0  0  0
  6 12  1  0  0  0  0
M  END
$$$$
96
  Mrv0541 12152312282D          

 13 13  0  0  0  0            999 V2000
    0.7145    1.2375    0.0000 C   0  0  0  0  0  0  0  0  0  0  0  0
    1.4289    0.8250    0.0000 C   0  0  0  0  0  0  0  0  0  0  0  0
    1.4289   -0.0000    0.0000 C   0  0  0  0  0  0  0  0  0  0  0  0
    0.7145   -0.4125    0.0000 C   0  0  0  0  0  0  0  0  0  0  0  0
    0.0000    0.0000    0.0000 C   0  0  0  0  0  0  0  0  0  0  0  0
    0.0000    0.8250    0.0000 C   0  0  0  0  0  0  0  0  0  0  0  0
    0.7145   -1.2375    0.0000 O   0  0  0  0  0  0  0  0  0  0  0  0
    0.7145    2.0625    0.0000 H   0  0  0  0  0  0  0  0  0  0  0  0
    2.1434    1.2375    0.0000 H   0  0  0  0  0  0  0  0  0  0  0  0
    2.1434   -0.4125    0.0000 H   0  0  0  0  0  0  0  0  0  0  0  0
   -0.7145   -0.4125    0.0000 H   0  0  0  0  0  0  0  0  0  0  0  0
   -0.7145    1.2375    0.0000 H   0  0  0  0  0  0  0  0  0  0  0  0
   -0.0000   -1.6500    0.0000 H   0  0  0  0  0  0  0  0  0  0  0  0
  1  2  4  0  0  0  0
  2  3  4  0  0  0  0
  3  4  4  0  0  0  0
  4  5  4  0  0  0  0
  5  6  4  0  0  0  0
  1  6  4  0  0  0  0
  4  7  1  0  0  0  0
  1  8  1  0  0  0  0
  2  9  1  0  0  0  0
  3 10  1  0  0  0  0
  5 11  1  0  0  0  0
  6 12  1  0  0  0  0
  7 13  1  0  0  0  0
M  END
$$$$
97
  Mrv0541 12152312282D          

 56 55  0  0  0  0            999 V2000
    8.4711    5.7158    0.0000 C   0  0  0  0  0  0  0  0  0  0  0  0
    9.1855    6.1283    0.0000 C   0  0  0  0  0  0  0  0  0  0  0  0
    9.9000    5.7158    0.0000 C   0  0  0  0  0  0  0  0  0  0  0  0
   10.6145    6.1283    0.0000 C   0  0  0  0  0  0  0  0  0  0  0  0
   11.3289    5.7158    0.0000 O   0  0  0  0  0  0  0  0  0  0  0  0
   12.0434    6.1283    0.0000 C   0  0  0  0  0  0  0  0  0  0  0  0
   12.0434    6.9533    0.0000 O   0  0  0  0  0  0  0  0  0  0  0  0
   12.7579    5.7158    0.0000 C   0  0  0  0  0  0  0  0  0  0  0  0
   13.4724    6.1283    0.0000 C   0  0  0  0  0  0  0  0  0  0  0  0
   14.1868    5.7158    0.0000 C   0  0  0  0  0  0  0  0  0  0  0  0
   14.9013    6.1283    0.0000 C   0  0  0  0  0  0  0  0  0  0  0  0
   15.6158    5.7158    0.0000 C   0  0  0  0  0  0  0  0  0  0  0  0
   16.3302    6.1283    0.0000 C   0  0  0  0  0  0  0  0  0  0  0  0
   17.0447    5.7158    0.0000 C   0  0  0  0  0  0  0  0  0  0  0  0
   17.7592    6.1283    0.0000 C   0  0  0  0  0  0  0  0  0  0  0  0
   18.4737    5.7158    0.0000 C   0  0  0  0  0  0  0  0  0  0  0  0
   18.4737    4.8908    0.0000 O   0  0  0  0  0  0  0  0  0  0  0  0
   19.1881    6.1283    0.0000 O   0  0  0  0  0  0  0  0  0  0  0  0
   19.9026    5.7158    0.0000 C   0  0  0  0  0  0  0  0  0  0  0  0
   20.6171    6.1283    0.0000 C   0  0  0  0  0  0  0  0  0  0  0  0
   21.3315    5.7158    0.0000 C   0  0  0  0  0  0  0  0  0  0  0  0
   22.0460    6.1283    0.0000 C   0  0  0  0  0  0  0  0  0  0  0  0
    8.0586    6.4302    0.0000 H   0  0  0  0  0  0  0  0  0  0  0  0
    7.7566    5.3033    0.0000 H   0  0  0  0  0  0  0  0  0  0  0  0
    8.8836    5.0013    0.0000 H   0  0  0  0  0  0  0  0  0  0  0  0
    8.7982    6.8567    0.0000 H   0  0  0  0  0  0  0  0  0  0  0  0
    9.5728    6.8567    0.0000 H   0  0  0  0  0  0  0  0  0  0  0  0
    9.5127    4.9873    0.0000 H   0  0  0  0  0  0  0  0  0  0  0  0
   10.2873    4.9873    0.0000 H   0  0  0  0  0  0  0  0  0  0  0  0
   10.2272    6.8567    0.0000 H   0  0  0  0  0  0  0  0  0  0  0  0
   11.0018    6.8567    0.0000 H   0  0  0  0  0  0  0  0  0  0  0  0
   12.3706    4.9873    0.0000 H   0  0  0  0  0  0  0  0  0  0  0  0
   13.1452    4.9873    0.0000 H   0  0  0  0  0  0  0  0  0  0  0  0
   13.0850    6.8567    0.0000 H   0  0  0  0  0  0  0  0  0  0  0  0
   13.8597    6.8567    0.0000 H   0  0  0  0  0  0  0  0  0  0  0  0
   13.7995    4.9873    0.0000 H   0  0  0  0  0  0  0  0  0  0  0  0
   14.5741    4.9873    0.0000 H   0  0  0  0  0  0  0  0  0  0  0  0
   14.5140    6.8567    0.0000 H   0  0  0  0  0  0  0  0  0  0  0  0
   15.2886    6.8567    0.0000 H   0  0  0  0  0  0  0  0  0  0  0  0
   15.2285    4.9873    0.0000 H   0  0  0  0  0  0  0  0  0  0  0  0
   16.0031    4.9873    0.0000 H   0  0  0  0  0  0  0  0  0  0  0  0
   15.9429    6.8567    0.0000 H   0  0  0  0  0  0  0  0  0  0  0  0
   16.7176    6.8567    0.0000 H   0  0  0  0  0  0  0  0  0  0  0  0
   16.6574    4.9873    0.0000 H   0  0  0  0  0  0  0  0  0  0  0  0
   17.4320    4.9873    0.0000 H   0  0  0  0  0  0  0  0  0  0  0  0
   17.3719    6.8567    0.0000 H   0  0  0  0  0  0  0  0  0  0  0  0
   18.1465    6.8567    0.0000 H   0  0  0  0  0  0  0  0  0  0  0  0
   19.5153    4.9873    0.0000 H   0  0  0  0  0  0  0  0  0  0  0  0
   20.2899    4.9873    0.0000 H   0  0  0  0  0  0  0  0  0  0  0  0
   20.2298    6.8567    0.0000 H   0  0  0  0  0  0  0  0  0  0  0  0
   21.0044    6.8567    0.0000 H   0  0  0  0  0  0  0  0  0  0  0  0
   20.9442    4.9873    0.0000 H   0  0  0  0  0  0  0  0  0  0  0  0
   21.7188    4.9873    0.0000 H   0  0  0  0  0  0  0  0  0  0  0  0
   22.4585    5.4138    0.0000 H   0  0  0  0  0  0  0  0  0  0  0  0
   22.7605    6.5408    0.0000 H   0  0  0  0  0  0  0  0  0  0  0  0
   21.6335    6.8427    0.0000 H   0  0  0  0  0  0  0  0  0  0  0  0
  1  2  1  0  0  0  0
  2  3  1  0  0  0  0
  3  4  1  0  0  0  0
  4  5  1  0  0  0  0
  5  6  1  0  0  0  0
  6  7  2  0  0  0  0
  6  8  1  0  0  0  0
  8  9  1  0  0  0  0
  9 10  1  0  0  0  0
 10 11  1  0  0  0  0
 11 12  1  0  0  0  0
 12 13  1  0  0  0  0
 13 14  1  0  0  0  0
 14 15  1  0  0  0  0
 15 16  1  0  0  0  0
 16 17  2  0  0  0  0
 16 18  1  0  0  0  0
 18 19  1  0  0  0  0
 19 20  1  0  0  0  0
 20 21  1  0  0  0  0
 21 22  1  0  0  0  0
  1 23  1  0  0  0  0
  1 24  1  0  0  0  0
  1 25  1  0  0  0  0
  2 26  1  0  0  0  0
  2 27  1  0  0  0  0
  3 28  1  0  0  0  0
  3 29  1  0  0  0  0
  4 30  1  0  0  0  0
  4 31  1  0  0  0  0
  8 32  1  0  0  0  0
  8 33  1  0  0  0  0
  9 34  1  0  0  0  0
  9 35  1  0  0  0  0
 10 36  1  0  0  0  0
 10 37  1  0  0  0  0
 11 38  1  0  0  0  0
 11 39  1  0  0  0  0
 12 40  1  0  0  0  0
 12 41  1  0  0  0  0
 13 42  1  0  0  0  0
 13 43  1  0  0  0  0
 14 44  1  0  0  0  0
 14 45  1  0  0  0  0
 15 46  1  0  0  0  0
 15 47  1  0  0  0  0
 19 48  1  0  0  0  0
 19 49  1  0  0  0  0
 20 50  1  0  0  0  0
 20 51  1  0  0  0  0
 21 52  1  0  0  0  0
 21 53  1  0  0  0  0
 22 54  1  0  0  0  0
 22 55  1  0  0  0  0
 22 56  1  0  0  0  0
M  END
$$$$
98
  Mrv0541 12152312282D          

 47 50  0  0  1  0            999 V2000
    6.4182    1.1886    0.0000 C   0  0  0  0  0  0  0  0  0  0  0  0
    5.7685    0.6801    0.0000 N   0  0  0  0  0  0  0  0  0  0  0  0
    5.0971    0.4763    0.0000 C   0  0  2  0  0  0  0  0  0  0  0  0
    4.2419    0.8128    0.0000 C   0  0  0  0  0  0  0  0  0  0  0  0
    3.8296    0.1134    0.0000 C   0  0  0  0  0  0  0  0  0  0  0  0
    4.4546    0.3230    0.0000 C   0  0  0  0  0  0  0  0  0  0  0  0
    5.3516   -0.0193    0.0000 C   0  0  1  0  0  0  0  0  0  0  0  0
    5.0332   -0.9546    0.0000 C   0  0  0  0  0  0  0  0  0  0  0  0
    4.2080   -0.8221    0.0000 C   0  0  0  0  0  0  0  0  0  0  0  0
    4.8045   -0.4329    0.0000 C   0  0  0  0  0  0  0  0  0  0  0  0
    3.4010   -0.9936    0.0000 N   0  0  0  0  0  0  0  0  0  0  0  0
    2.8490   -0.3805    0.0000 C   0  0  0  0  0  0  0  0  0  0  0  0
    3.1039    0.4041    0.0000 O   0  0  0  0  0  0  0  0  0  0  0  0
    2.0420   -0.5520    0.0000 C   0  0  0  0  0  0  0  0  0  0  0  0
    1.7065   -1.3057    0.0000 N   0  0  0  0  0  0  0  0  0  0  0  0
    0.8860   -1.2195    0.0000 N   0  0  0  0  0  0  0  0  0  0  0  0
    0.7145   -0.4125    0.0000 C   0  0  0  0  0  0  0  0  0  0  0  0
    0.0000    0.0000    0.0000 C   0  0  0  0  0  0  0  0  0  0  0  0
    0.0000    0.8250    0.0000 C   0  0  0  0  0  0  0  0  0  0  0  0
    0.7145    1.2375    0.0000 C   0  0  0  0  0  0  0  0  0  0  0  0
    1.4289    0.8250    0.0000 C   0  0  0  0  0  0  0  0  0  0  0  0
    1.4289    0.0000    0.0000 C   0  0  0  0  0  0  0  0  0  0  0  0
    0.3340   -1.8326    0.0000 C   0  0  0  0  0  0  0  0  0  0  0  0
    6.9267    0.5389    0.0000 H   0  0  0  0  0  0  0  0  0  0  0  0
    7.0679    1.6970    0.0000 H   0  0  0  0  0  0  0  0  0  0  0  0
    5.9098    1.8383    0.0000 H   0  0  0  0  0  0  0  0  0  0  0  0
    5.6770    1.0631    0.0000 H   0  0  0  0  0  0  0  0  0  0  0  0
    4.4056    1.6214    0.0000 H   0  0  0  0  0  0  0  0  0  0  0  0
    3.6151    1.3492    0.0000 H   0  0  0  0  0  0  0  0  0  0  0  0
    3.0050    0.0876    0.0000 H   0  0  0  0  0  0  0  0  0  0  0  0
    3.6333   -0.6879    0.0000 H   0  0  0  0  0  0  0  0  0  0  0  0
    4.1135    1.0742    0.0000 H   0  0  0  0  0  0  0  0  0  0  0  0
    4.8263    1.0596    0.0000 H   0  0  0  0  0  0  0  0  0  0  0  0
    6.0984    0.3314    0.0000 H   0  0  0  0  0  0  0  0  0  0  0  0
    5.7577   -1.3494    0.0000 H   0  0  0  0  0  0  0  0  0  0  0  0
    5.0429   -1.7795    0.0000 H   0  0  0  0  0  0  0  0  0  0  0  0
    4.2287   -1.6468    0.0000 H   0  0  0  0  0  0  0  0  0  0  0  0
    5.4087   -0.9946    0.0000 H   0  0  0  0  0  0  0  0  0  0  0  0
    5.6121   -0.6016    0.0000 H   0  0  0  0  0  0  0  0  0  0  0  0
    3.1461   -1.7782    0.0000 H   0  0  0  0  0  0  0  0  0  0  0  0
   -0.7145   -0.4125    0.0000 H   0  0  0  0  0  0  0  0  0  0  0  0
   -0.7145    1.2375    0.0000 H   0  0  0  0  0  0  0  0  0  0  0  0
    0.7145    2.0625    0.0000 H   0  0  0  0  0  0  0  0  0  0  0  0
    2.1434    1.2375    0.0000 H   0  0  0  0  0  0  0  0  0  0  0  0
   -0.2791   -1.2805    0.0000 H   0  0  0  0  0  0  0  0  0  0  0  0
   -0.2181   -2.4457    0.0000 H   0  0  0  0  0  0  0  0  0  0  0  0
    0.9471   -2.3846    0.0000 H   0  0  0  0  0  0  0  0  0  0  0  0
  1  2  1  0  0  0  0
  2  3  1  0  0  0  0
  3  4  1  0  0  0  0
  4  5  1  0  0  0  0
  5  6  1  0  0  0  0
  6  7  1  0  0  0  0
  2  7  1  0  0  0  0
  7  8  1  0  0  0  0
  8  9  1  0  0  0  0
  9 10  1  0  0  0  0
  3 10  1  0  0  0  0
  9 11  1  0  0  0  0
 11 12  1  0  0  0  0
 12 13  2  0  0  0  0
 12 14  1  0  0  0  0
 14 15  4  0  0  0  0
 15 16  4  0  0  0  0
 16 17  4  0  0  0  0
 17 18  4  0  0  0  0
 18 19  4  0  0  0  0
 19 20  4  0  0  0  0
 20 21  4  0  0  0  0
 21 22  4  0  0  0  0
 17 22  4  0  0  0  0
 14 22  4  0  0  0  0
 16 23  1  0  0  0  0
  1 24  1  0  0  0  0
  1 25  1  0  0  0  0
  1 26  1  0  0  0  0
  3 27  1  6  0  0  0
  4 28  1  0  0  0  0
  4 29  1  0  0  0  0
  5 30  1  0  0  0  0
  5 31  1  0  0  0  0
  6 32  1  0  0  0  0
  6 33  1  0  0  0  0
  7 34  1  1  0  0  0
  8 35  1  0  0  0  0
  8 36  1  0  0  0  0
  9 37  1  0  0  0  0
 10 38  1  0  0  0  0
 10 39  1  0  0  0  0
 11 40  1  0  0  0  0
 18 41  1  0  0  0  0
 19 42  1  0  0  0  0
 20 43  1  0  0  0  0
 21 44  1  0  0  0  0
 23 45  1  0  0  0  0
 23 46  1  0  0  0  0
 23 47  1  0  0  0  0
M  END
$$$$
99
  Mrv0541 12152312282D          

 13 13  0  0  0  0            999 V2000
    0.5678    1.1143    0.0000 C   0  0  0  0  0  0  0  0  0  0  0  0
    1.2352    0.6294    0.0000 C   0  0  0  0  0  0  0  0  0  0  0  0
    0.9803   -0.1553    0.0000 C   0  0  0  0  0  0  0  0  0  0  0  0
    0.1553   -0.1553    0.0000 O   0  0  0  0  0  0  0  0  0  0  0  0
   -0.0997    0.6294    0.0000 C   0  0  0  0  0  0  0  0  0  0  0  0
    0.9728    1.8330    0.0000 H   0  0  0  0  0  0  0  0  0  0  0  0
    0.1628    1.8330    0.0000 H   0  0  0  0  0  0  0  0  0  0  0  0
    1.7936    1.2366    0.0000 H   0  0  0  0  0  0  0  0  0  0  0  0
    2.0439    0.4663    0.0000 H   0  0  0  0  0  0  0  0  0  0  0  0
    1.7304   -0.4987    0.0000 H   0  0  0  0  0  0  0  0  0  0  0  0
    1.0751   -0.9748    0.0000 H   0  0  0  0  0  0  0  0  0  0  0  0
   -0.9084    0.4663    0.0000 H   0  0  0  0  0  0  0  0  0  0  0  0
   -0.6581    1.2366    0.0000 H   0  0  0  0  0  0  0  0  0  0  0  0
  1  2  1  0  0  0  0
  2  3  1  0  0  0  0
  3  4  1  0  0  0  0
  4  5  1  0  0  0  0
  1  5  1  0  0  0  0
  1  6  1  0  0  0  0
  1  7  1  0  0  0  0
  2  8  1  0  0  0  0
  2  9  1  0  0  0  0
  3 10  1  0  0  0  0
  3 11  1  0  0  0  0
  5 12  1  0  0  0  0
  5 13  1  0  0  0  0
M  END
$$$$
100
  Mrv0541 12152312282D          

  9  9  0  0  0  0            999 V2000
    0.5678    1.1143    0.0000 C   0  0  0  0  0  0  0  0  0  0  0  0
    1.2352    0.6294    0.0000 C   0  0  0  0  0  0  0  0  0  0  0  0
    0.9803   -0.1553    0.0000 O   0  0  0  0  0  0  0  0  0  0  0  0
    0.1553   -0.1553    0.0000 C   0  0  0  0  0  0  0  0  0  0  0  0
   -0.0997    0.6294    0.0000 C   0  0  0  0  0  0  0  0  0  0  0  0
    0.5678    1.9393    0.0000 H   0  0  0  0  0  0  0  0  0  0  0  0
    2.0198    0.8843    0.0000 H   0  0  0  0  0  0  0  0  0  0  0  0
   -0.3297   -0.8227    0.0000 H   0  0  0  0  0  0  0  0  0  0  0  0
   -0.8843    0.8843    0.0000 H   0  0  0  0  0  0  0  0  0  0  0  0
  1  2  4  0  0  0  0
  2  3  4  0  0  0  0
  3  4  4  0  0  0  0
  4  5  4  0  0  0  0
  1  5  4  0  0  0  0
  1  6  1  0  0  0  0
  2  7  1  0  0  0  0
  4  8  1  0  0  0  0
  5  9  1  0  0  0  0
M  END
$$$$
101
  Mrv0541 12152312282D          

 30 31  0  0  0  0            999 V2000
    2.1434    1.2375    0.0000 C   0  0  0  0  0  0  0  0  0  0  0  0
    2.1434    0.4125    0.0000 C   0  0  0  0  0  0  0  0  0  0  0  0
    2.1434   -0.4125    0.0000 C   0  0  0  0  0  0  0  0  0  0  0  0
    2.1434   -1.2375    0.0000 C   0  0  0  0  0  0  0  0  0  0  0  0
    2.8579   -1.6500    0.0000 N   0  0  0  0  0  0  0  0  0  0  0  0
    2.8579   -2.4750    0.0000 C   0  0  0  0  0  0  0  0  0  0  0  0
    2.1434   -2.8875    0.0000 N   0  0  0  0  0  0  0  0  0  0  0  0
    1.4289   -2.4750    0.0000 C   0  0  0  0  0  0  0  0  0  0  0  0
    1.4289   -1.6500    0.0000 C   0  0  0  0  0  0  0  0  0  0  0  0
    0.7145   -2.8875    0.0000 C   0  0  0  0  0  0  0  0  0  0  0  0
    3.5724   -2.8875    0.0000 N   0  0  0  0  0  0  0  0  0  0  0  0
    3.5724   -3.7125    0.0000 C   0  0  0  0  0  0  0  0  0  0  0  0
    4.2868   -4.1250    0.0000 C   0  0  0  0  0  0  0  0  0  0  0  0
    4.2868   -4.9500    0.0000 C   0  0  0  0  0  0  0  0  0  0  0  0
    3.5724   -5.3625    0.0000 C   0  0  0  0  0  0  0  0  0  0  0  0
    2.8579   -4.9500    0.0000 C   0  0  0  0  0  0  0  0  0  0  0  0
    2.8579   -4.1250    0.0000 C   0  0  0  0  0  0  0  0  0  0  0  0
    2.9684    1.2375    0.0000 H   0  0  0  0  0  0  0  0  0  0  0  0
    2.1434    2.0625    0.0000 H   0  0  0  0  0  0  0  0  0  0  0  0
    1.3184    1.2375    0.0000 H   0  0  0  0  0  0  0  0  0  0  0  0
    0.7145   -1.2375    0.0000 H   0  0  0  0  0  0  0  0  0  0  0  0
    0.3020   -2.1730    0.0000 H   0  0  0  0  0  0  0  0  0  0  0  0
    0.0000   -3.3000    0.0000 H   0  0  0  0  0  0  0  0  0  0  0  0
    1.1270   -3.6020    0.0000 H   0  0  0  0  0  0  0  0  0  0  0  0
    4.2868   -2.4750    0.0000 H   0  0  0  0  0  0  0  0  0  0  0  0
    5.0013   -3.7125    0.0000 H   0  0  0  0  0  0  0  0  0  0  0  0
    5.0013   -5.3625    0.0000 H   0  0  0  0  0  0  0  0  0  0  0  0
    3.5724   -6.1875    0.0000 H   0  0  0  0  0  0  0  0  0  0  0  0
    2.1434   -5.3625    0.0000 H   0  0  0  0  0  0  0  0  0  0  0  0
    2.1434   -3.7125    0.0000 H   0  0  0  0  0  0  0  0  0  0  0  0
  1  2  1  0  0  0  0
  2  3  3  0  0  0  0
  3  4  1  0  0  0  0
  4  5  4  0  0  0  0
  5  6  4  0  0  0  0
  6  7  4  0  0  0  0
  7  8  4  0  0  0  0
  8  9  4  0  0  0  0
  4  9  4  0  0  0  0
  8 10  1  0  0  0  0
  6 11  1  0  0  0  0
 11 12  1  0  0  0  0
 12 13  4  0  0  0  0
 13 14  4  0  0  0  0
 14 15  4  0  0  0  0
 15 16  4  0  0  0  0
 16 17  4  0  0  0  0
 12 17  4  0  0  0  0
  1 18  1  0  0  0  0
  1 19  1  0  0  0  0
  1 20  1  0  0  0  0
  9 21  1  0  0  0  0
 10 22  1  0  0  0  0
 10 23  1  0  0  0  0
 10 24  1  0  0  0  0
 11 25  1  0  0  0  0
 13 26  1  0  0  0  0
 14 27  1  0  0  0  0
 15 28  1  0  0  0  0
 16 29  1  0  0  0  0
 17 30  1  0  0  0  0
M  END
$$$$
102
  Mrv0541 12152312282D          

 64 63  0  0  0  0            999 V2000
   -0.2427    2.3349    0.0000 C   0  0  0  0  0  0  0  0  0  0  0  0
    0.4717    2.7474    0.0000 C   0  0  0  0  0  0  0  0  0  0  0  0
    1.1862    2.3349    0.0000 C   0  0  0  0  0  0  0  0  0  0  0  0
    1.9007    2.7474    0.0000 C   0  0  0  0  0  0  0  0  0  0  0  0
    2.6151    2.3349    0.0000 C   0  0  0  0  0  0  0  0  0  0  0  0
    3.3296    2.7474    0.0000 C   0  0  0  0  0  0  0  0  0  0  0  0
    4.0441    2.3349    0.0000 C   0  0  0  0  0  0  0  0  0  0  0  0
    4.7586    2.7474    0.0000 C   0  0  0  0  0  0  0  0  0  0  0  0
    5.4730    2.3349    0.0000 C   0  0  0  0  0  0  0  0  0  0  0  0
    6.1875    2.7474    0.0000 C   0  0  0  0  0  0  0  0  0  0  0  0
    6.1875    3.5724    0.0000 C   0  0  0  0  0  0  0  0  0  0  0  0
    6.9020    3.9849    0.0000 C   0  0  0  0  0  0  0  0  0  0  0  0
    7.6164    3.5724    0.0000 C   0  0  0  0  0  0  0  0  0  0  0  0
    8.3309    3.9849    0.0000 C   0  0  0  0  0  0  0  0  0  0  0  0
    9.0454    3.5724    0.0000 C   0  0  0  0  0  0  0  0  0  0  0  0
    9.7599    3.9849    0.0000 C   0  0  0  0  0  0  0  0  0  0  0  0
   10.4743    3.5724    0.0000 C   0  0  0  0  0  0  0  0  0  0  0  0
   11.1888    3.9849    0.0000 C   0  0  0  0  0  0  0  0  0  0  0  0
   11.1888    4.8099    0.0000 O   0  0  0  0  0  0  0  0  0  0  0  0
   11.9033    3.5724    0.0000 N   0  0  0  0  0  0  0  0  0  0  0  0
   11.9033    2.7474    0.0000 C   0  0  0  0  0  0  0  0  0  0  0  0
   12.6177    3.9849    0.0000 C   0  0  0  0  0  0  0  0  0  0  0  0
   13.3322    3.5724    0.0000 C   0  0  0  0  0  0  0  0  0  0  0  0
   14.0467    3.9849    0.0000 O   0  0  0  0  0  0  0  0  0  0  0  0
   13.3322    2.7474    0.0000 O   0  0  0  0  0  0  0  0  0  0  0  0
   -0.6552    3.0493    0.0000 H   0  0  0  0  0  0  0  0  0  0  0  0
   -0.9572    1.9224    0.0000 H   0  0  0  0  0  0  0  0  0  0  0  0
    0.1698    1.6204    0.0000 H   0  0  0  0  0  0  0  0  0  0  0  0
    0.0844    3.4758    0.0000 H   0  0  0  0  0  0  0  0  0  0  0  0
    0.8590    3.4758    0.0000 H   0  0  0  0  0  0  0  0  0  0  0  0
    0.7989    1.6064    0.0000 H   0  0  0  0  0  0  0  0  0  0  0  0
    1.5735    1.6064    0.0000 H   0  0  0  0  0  0  0  0  0  0  0  0
    1.5134    3.4758    0.0000 H   0  0  0  0  0  0  0  0  0  0  0  0
    2.2880    3.4758    0.0000 H   0  0  0  0  0  0  0  0  0  0  0  0
    2.2278    1.6064    0.0000 H   0  0  0  0  0  0  0  0  0  0  0  0
    3.0025    1.6064    0.0000 H   0  0  0  0  0  0  0  0  0  0  0  0
    2.9423    3.4758    0.0000 H   0  0  0  0  0  0  0  0  0  0  0  0
    3.7169    3.4758    0.0000 H   0  0  0  0  0  0  0  0  0  0  0  0
    3.6568    1.6064    0.0000 H   0  0  0  0  0  0  0  0  0  0  0  0
    4.4314    1.6064    0.0000 H   0  0  0  0  0  0  0  0  0  0  0  0
    4.3712    3.4758    0.0000 H   0  0  0  0  0  0  0  0  0  0  0  0
    4.8734    3.5643    0.0000 H   0  0  0  0  0  0  0  0  0  0  0  0
    5.4730    1.5099    0.0000 H   0  0  0  0  0  0  0  0  0  0  0  0
    6.9020    2.3349    0.0000 H   0  0  0  0  0  0  0  0  0  0  0  0
    5.4226    3.8814    0.0000 H   0  0  0  0  0  0  0  0  0  0  0  0
    5.7503    4.2720    0.0000 H   0  0  0  0  0  0  0  0  0  0  0  0
    6.5147    4.7133    0.0000 H   0  0  0  0  0  0  0  0  0  0  0  0
    7.2893    4.7133    0.0000 H   0  0  0  0  0  0  0  0  0  0  0  0
    7.2291    2.8439    0.0000 H   0  0  0  0  0  0  0  0  0  0  0  0
    8.0038    2.8439    0.0000 H   0  0  0  0  0  0  0  0  0  0  0  0
    7.9436    4.7133    0.0000 H   0  0  0  0  0  0  0  0  0  0  0  0
    8.7182    4.7133    0.0000 H   0  0  0  0  0  0  0  0  0  0  0  0
    8.6581    2.8439    0.0000 H   0  0  0  0  0  0  0  0  0  0  0  0
    9.4327    2.8439    0.0000 H   0  0  0  0  0  0  0  0  0  0  0  0
    9.3725    4.7133    0.0000 H   0  0  0  0  0  0  0  0  0  0  0  0
   10.1472    4.7133    0.0000 H   0  0  0  0  0  0  0  0  0  0  0  0
   10.0870    2.8439    0.0000 H   0  0  0  0  0  0  0  0  0  0  0  0
   11.0874    3.0203    0.0000 H   0  0  0  0  0  0  0  0  0  0  0  0
   11.1280    2.4652    0.0000 H   0  0  0  0  0  0  0  0  0  0  0  0
   11.9033    1.9224    0.0000 H   0  0  0  0  0  0  0  0  0  0  0  0
   12.7283    2.7474    0.0000 H   0  0  0  0  0  0  0  0  0  0  0  0
   12.2304    4.7133    0.0000 H   0  0  0  0  0  0  0  0  0  0  0  0
   13.0051    4.7133    0.0000 H   0  0  0  0  0  0  0  0  0  0  0  0
   12.6177    2.3349    0.0000 H   0  0  0  0  0  0  0  0  0  0  0  0
  1  2  1  0  0  0  0
  2  3  1  0  0  0  0
  3  4  1  0  0  0  0
  4  5  1  0  0  0  0
  5  6  1  0  0  0  0
  6  7  1  0  0  0  0
  7  8  1  0  0  0  0
  8  9  1  0  0  0  0
  9 10  2  0  0  0  0
 10 11  1  0  0  0  0
 11 12  1  0  0  0  0
 12 13  1  0  0  0  0
 13 14  1  0  0  0  0
 14 15  1  0  0  0  0
 15 16  1  0  0  0  0
 16 17  1  0  0  0  0
 17 18  1  0  0  0  0
 18 19  2  0  0  0  0
 18 20  1  0  0  0  0
 20 21  1  0  0  0  0
 20 22  1  0  0  0  0
 22 23  1  0  0  0  0
 23 24  2  0  0  0  0
 23 25  1  0  0  0  0
  1 26  1  0  0  0  0
  1 27  1  0  0  0  0
  1 28  1  0  0  0  0
  2 29  1  0  0  0  0
  2 30  1  0  0  0  0
  3 31  1  0  0  0  0
  3 32  1  0  0  0  0
  4 33  1  0  0  0  0
  4 34  1  0  0  0  0
  5 35  1  0  0  0  0
  5 36  1  0  0  0  0
  6 37  1  0  0  0  0
  6 38  1  0  0  0  0
  7 39  1  0  0  0  0
  7 40  1  0  0  0  0
  8 41  1  0  0  0  0
  8 42  1  0  0  0  0
  9 43  1  0  0  0  0
 10 44  1  0  0  0  0
 11 45  1  0  0  0  0
 11 46  1  0  0  0  0
 12 47  1  0  0  0  0
 12 48  1  0  0  0  0
 13 49  1  0  0  0  0
 13 50  1  0  0  0  0
 14 51  1  0  0  0  0
 14 52  1  0  0  0  0
 15 53  1  0  0  0  0
 15 54  1  0  0  0  0
 16 55  1  0  0  0  0
 16 56  1  0  0  0  0
 17 57  1  0  0  0  0
 17 58  1  0  0  0  0
 21 59  1  0  0  0  0
 21 60  1  0  0  0  0
 21 61  1  0  0  0  0
 22 62  1  0  0  0  0
 22 63  1  0  0  0  0
 25 64  1  0  0  0  0
M  END
$$$$
103
  Mrv0541 12152312282D          

 21 20  0  0  0  0            999 V2000
    2.9980    2.5559    0.0000 C   0  0  0  0  0  0  0  0  0  0  0  0
    3.7125    2.1434    0.0000 C   0  0  0  0  0  0  0  0  0  0  0  0
    4.4270    2.5559    0.0000 C   0  0  0  0  0  0  0  0  0  0  0  0
    4.4270    3.3809    0.0000 O   0  0  0  0  0  0  0  0  0  0  0  0
    5.1414    2.1434    0.0000 N   0  0  0  0  0  0  0  0  0  0  0  0
    5.8559    2.5559    0.0000 C   0  0  0  0  0  0  0  0  0  0  0  0
    6.5704    2.1434    0.0000 N   0  0  0  0  0  0  0  0  0  0  0  0
    7.2849    2.5559    0.0000 C   0  0  0  0  0  0  0  0  0  0  0  0
    7.2849    3.3809    0.0000 O   0  0  0  0  0  0  0  0  0  0  0  0
    7.9993    2.1434    0.0000 C   0  0  0  0  0  0  0  0  0  0  0  0
    8.7138    2.5559    0.0000 C   0  0  0  0  0  0  0  0  0  0  0  0
    2.9980    3.3809    0.0000 H   0  0  0  0  0  0  0  0  0  0  0  0
    2.2836    2.1434    0.0000 H   0  0  0  0  0  0  0  0  0  0  0  0
    3.7125    1.3184    0.0000 H   0  0  0  0  0  0  0  0  0  0  0  0
    5.1414    1.3184    0.0000 H   0  0  0  0  0  0  0  0  0  0  0  0
    5.4686    3.2843    0.0000 H   0  0  0  0  0  0  0  0  0  0  0  0
    6.2432    3.2843    0.0000 H   0  0  0  0  0  0  0  0  0  0  0  0
    6.5704    1.3184    0.0000 H   0  0  0  0  0  0  0  0  0  0  0  0
    7.9993    1.3184    0.0000 H   0  0  0  0  0  0  0  0  0  0  0  0
    9.4283    2.1434    0.0000 H   0  0  0  0  0  0  0  0  0  0  0  0
    8.7138    3.3809    0.0000 H   0  0  0  0  0  0  0  0  0  0  0  0
  1  2  2  0  0  0  0
  2  3  1  0  0  0  0
  3  4  2  0  0  0  0
  3  5  1  0  0  0  0
  5  6  1  0  0  0  0
  6  7  1  0  0  0  0
  7  8  1  0  0  0  0
  8  9  2  0  0  0  0
  8 10  1  0  0  0  0
 10 11  2  0  0  0  0
  1 12  1  0  0  0  0
  1 13  1  0  0  0  0
  2 14  1  0  0  0  0
  5 15  1  0  0  0  0
  6 16  1  0  0  0  0
  6 17  1  0  0  0  0
  7 18  1  0  0  0  0
 10 19  1  0  0  0  0
 11 20  1  0  0  0  0
 11 21  1  0  0  0  0
M  END
$$$$
104
  Mrv0541 12152312282D          

 49 51  0  0  0  0            999 V2000
   -1.4289   -0.0000    0.0000 C   0  0  0  0  0  0  0  0  0  0  0  0
   -0.7145   -0.4125    0.0000 O   0  0  0  0  0  0  0  0  0  0  0  0
   -0.7145   -1.2375    0.0000 C   0  0  0  0  0  0  0  0  0  0  0  0
    0.0000   -1.6500    0.0000 C   0  0  0  0  0  0  0  0  0  0  0  0
    0.0000   -2.4750    0.0000 C   0  0  0  0  0  0  0  0  0  0  0  0
   -0.7145   -2.8875    0.0000 C   0  0  0  0  0  0  0  0  0  0  0  0
   -1.4289   -2.4750    0.0000 C   0  0  0  0  0  0  0  0  0  0  0  0
   -1.4289   -1.6500    0.0000 C   0  0  0  0  0  0  0  0  0  0  0  0
   -0.7145   -3.7125    0.0000 C   0  0  0  0  0  0  0  0  0  0  0  0
   -1.4289   -4.1250    0.0000 C   0  0  0  0  0  0  0  0  0  0  0  0
   -1.4289   -4.9500    0.0000 C   0  0  0  0  0  0  0  0  0  0  0  0
   -0.7145   -5.3625    0.0000 O   0  0  0  0  0  0  0  0  0  0  0  0
   -2.1434   -5.3625    0.0000 N   0  0  0  0  0  0  0  0  0  0  0  0
   -2.1434   -6.1875    0.0000 C   0  0  0  0  0  0  0  0  0  0  0  0
   -2.8579   -6.6000    0.0000 C   0  0  0  0  0  0  0  0  0  0  0  0
   -3.5724   -6.1875    0.0000 O   0  0  0  0  0  0  0  0  0  0  0  0
   -3.5724   -5.3625    0.0000 C   0  0  0  0  0  0  0  0  0  0  0  0
   -2.8579   -4.9500    0.0000 C   0  0  0  0  0  0  0  0  0  0  0  0
   -0.0000   -4.1250    0.0000 C   0  0  0  0  0  0  0  0  0  0  0  0
    0.7145   -3.7125    0.0000 C   0  0  0  0  0  0  0  0  0  0  0  0
    1.4289   -4.1250    0.0000 C   0  0  0  0  0  0  0  0  0  0  0  0
    1.4289   -4.9500    0.0000 C   0  0  0  0  0  0  0  0  0  0  0  0
    0.7145   -5.3625    0.0000 C   0  0  0  0  0  0  0  0  0  0  0  0
   -0.0000   -4.9500    0.0000 C   0  0  0  0  0  0  0  0  0  0  0  0
    2.1434   -5.3625    0.0000 Cl  0  0  0  0  0  0  0  0  0  0  0  0
    0.7145   -1.2375    0.0000 O   0  0  0  0  0  0  0  0  0  0  0  0
    1.4289   -1.6500    0.0000 C   0  0  0  0  0  0  0  0  0  0  0  0
   -1.0164    0.7145    0.0000 H   0  0  0  0  0  0  0  0  0  0  0  0
   -2.1434    0.4125    0.0000 H   0  0  0  0  0  0  0  0  0  0  0  0
   -1.8414   -0.7145    0.0000 H   0  0  0  0  0  0  0  0  0  0  0  0
    0.8125   -2.6183    0.0000 H   0  0  0  0  0  0  0  0  0  0  0  0
   -2.1434   -2.8875    0.0000 H   0  0  0  0  0  0  0  0  0  0  0  0
   -2.1434   -1.2375    0.0000 H   0  0  0  0  0  0  0  0  0  0  0  0
   -2.1434   -3.7125    0.0000 H   0  0  0  0  0  0  0  0  0  0  0  0
   -1.3189   -6.2163    0.0000 H   0  0  0  0  0  0  0  0  0  0  0  0
   -1.7062   -6.8871    0.0000 H   0  0  0  0  0  0  0  0  0  0  0  0
   -2.4706   -7.3284    0.0000 H   0  0  0  0  0  0  0  0  0  0  0  0
   -3.2452   -7.3284    0.0000 H   0  0  0  0  0  0  0  0  0  0  0  0
   -4.3969   -5.3337    0.0000 H   0  0  0  0  0  0  0  0  0  0  0  0
   -4.0095   -4.6629    0.0000 H   0  0  0  0  0  0  0  0  0  0  0  0
   -3.2452   -4.2216    0.0000 H   0  0  0  0  0  0  0  0  0  0  0  0
   -2.4706   -4.2216    0.0000 H   0  0  0  0  0  0  0  0  0  0  0  0
    0.9966   -2.9373    0.0000 H   0  0  0  0  0  0  0  0  0  0  0  0
    2.1434   -3.7125    0.0000 H   0  0  0  0  0  0  0  0  0  0  0  0
    0.7145   -6.1875    0.0000 H   0  0  0  0  0  0  0  0  0  0  0  0
   -0.8125   -5.0933    0.0000 H   0  0  0  0  0  0  0  0  0  0  0  0
    1.0164   -2.3645    0.0000 H   0  0  0  0  0  0  0  0  0  0  0  0
    2.1434   -2.0625    0.0000 H   0  0  0  0  0  0  0  0  0  0  0  0
    1.8414   -0.9355    0.0000 H   0  0  0  0  0  0  0  0  0  0  0  0
  1  2  1  0  0  0  0
  2  3  1  0  0  0  0
  3  4  4  0  0  0  0
  4  5  4  0  0  0  0
  5  6  4  0  0  0  0
  6  7  4  0  0  0  0
  7  8  4  0  0  0  0
  3  8  4  0  0  0  0
  6  9  1  0  0  0  0
  9 10  2  0  0  0  0
 10 11  1  0  0  0  0
 11 12  2  0  0  0  0
 11 13  1  0  0  0  0
 13 14  1  0  0  0  0
 14 15  1  0  0  0  0
 15 16  1  0  0  0  0
 16 17  1  0  0  0  0
 17 18  1  0  0  0  0
 13 18  1  0  0  0  0
  9 19  1  0  0  0  0
 19 20  4  0  0  0  0
 20 21  4  0  0  0  0
 21 22  4  0  0  0  0
 22 23  4  0  0  0  0
 23 24  4  0  0  0  0
 19 24  4  0  0  0  0
 22 25  1  0  0  0  0
  4 26  1  0  0  0  0
 26 27  1  0  0  0  0
  1 28  1  0  0  0  0
  1 29  1  0  0  0  0
  1 30  1  0  0  0  0
  5 31  1  0  0  0  0
  7 32  1  0  0  0  0
  8 33  1  0  0  0  0
 10 34  1  0  0  0  0
 14 35  1  0  0  0  0
 14 36  1  0  0  0  0
 15 37  1  0  0  0  0
 15 38  1  0  0  0  0
 17 39  1  0  0  0  0
 17 40  1  0  0  0  0
 18 41  1  0  0  0  0
 18 42  1  0  0  0  0
 20 43  1  0  0  0  0
 21 44  1  0  0  0  0
 23 45  1  0  0  0  0
 24 46  1  0  0  0  0
 27 47  1  0  0  0  0
 27 48  1  0  0  0  0
 27 49  1  0  0  0  0
M  END
$$$$
105
  Mrv0541 12152312282D          

 20 19  0  0  0  0            999 V2000
   -0.1914    0.7145    0.0000 C   0  0  0  0  0  0  0  0  0  0  0  0
    0.5230    1.1270    0.0000 C   0  0  0  0  0  0  0  0  0  0  0  0
    1.2375    0.7145    0.0000 C   0  0  0  0  0  0  0  0  0  0  0  0
    1.9520    1.1270    0.0000 C   0  0  0  0  0  0  0  0  0  0  0  0
    2.6664    0.7145    0.0000 C   0  0  0  0  0  0  0  0  0  0  0  0
    3.3809    1.1270    0.0000 C   0  0  0  0  0  0  0  0  0  0  0  0
   -0.6039    1.4289    0.0000 H   0  0  0  0  0  0  0  0  0  0  0  0
   -0.9059    0.3020    0.0000 H   0  0  0  0  0  0  0  0  0  0  0  0
    0.2211    0.0000    0.0000 H   0  0  0  0  0  0  0  0  0  0  0  0
    0.1357    1.8554    0.0000 H   0  0  0  0  0  0  0  0  0  0  0  0
    0.9103    1.8554    0.0000 H   0  0  0  0  0  0  0  0  0  0  0  0
    0.8502   -0.0140    0.0000 H   0  0  0  0  0  0  0  0  0  0  0  0
    1.6248   -0.0140    0.0000 H   0  0  0  0  0  0  0  0  0  0  0  0
    1.5647    1.8554    0.0000 H   0  0  0  0  0  0  0  0  0  0  0  0
    2.3393    1.8554    0.0000 H   0  0  0  0  0  0  0  0  0  0  0  0
    2.2791   -0.0140    0.0000 H   0  0  0  0  0  0  0  0  0  0  0  0
    3.0538   -0.0140    0.0000 H   0  0  0  0  0  0  0  0  0  0  0  0
    3.7934    0.4125    0.0000 H   0  0  0  0  0  0  0  0  0  0  0  0
    4.0954    1.5395    0.0000 H   0  0  0  0  0  0  0  0  0  0  0  0
    2.9684    1.8414    0.0000 H   0  0  0  0  0  0  0  0  0  0  0  0
  1  2  1  0  0  0  0
  2  3  1  0  0  0  0
  3  4  1  0  0  0  0
  4  5  1  0  0  0  0
  5  6  1  0  0  0  0
  1  7  1  0  0  0  0
  1  8  1  0  0  0  0
  1  9  1  0  0  0  0
  2 10  1  0  0  0  0
  2 11  1  0  0  0  0
  3 12  1  0  0  0  0
  3 13  1  0  0  0  0
  4 14  1  0  0  0  0
  4 15  1  0  0  0  0
  5 16  1  0  0  0  0
  5 17  1  0  0  0  0
  6 18  1  0  0  0  0
  6 19  1  0  0  0  0
  6 20  1  0  0  0  0
M  END
$$$$
106
  Mrv0541 12152312282D          

 44 45  0  0  1  0            999 V2000
    1.8666    0.9216    0.0000 H   0  0  0  0  0  0  0  0  0  0  0  0
    1.0416    0.9216    0.0000 C   0  0  0  0  0  0  0  0  0  0  0  0
    1.0416    1.7466    0.0000 H   0  0  0  0  0  0  0  0  0  0  0  0
    0.2166    0.9216    0.0000 H   0  0  0  0  0  0  0  0  0  0  0  0
    1.0416    0.0966    0.0000 N   0  0  0  0  0  0  0  0  0  0  0  0
    0.3272   -0.3159    0.0000 C   0  0  0  0  0  0  0  0  0  0  0  0
    0.3272   -1.1409    0.0000 C   0  0  1  0  0  0  0  0  0  0  0  0
    1.0416   -1.5534    0.0000 C   0  0  0  0  0  0  0  0  0  0  0  0
    1.0416   -2.3784    0.0000 C   0  0  0  0  0  0  0  0  0  0  0  0
    0.3272   -2.7909    0.0000 C   0  0  0  0  0  0  0  0  0  0  0  0
   -0.3873   -2.3784    0.0000 C   0  0  0  0  0  0  0  0  0  0  0  0
   -0.3873   -1.5534    0.0000 C   0  0  2  0  0  0  0  0  0  0  0  0
   -1.2118   -1.5246    0.0000 C   0  0  0  0  0  0  0  0  0  0  0  0
   -1.6490   -2.2243    0.0000 C   0  0  0  0  0  0  0  0  0  0  0  0
   -2.4735   -2.1955    0.0000 C   0  0  0  0  0  0  0  0  0  0  0  0
   -2.8608   -1.4671    0.0000 C   0  0  0  0  0  0  0  0  0  0  0  0
   -2.4236   -0.7674    0.0000 C   0  0  0  0  0  0  0  0  0  0  0  0
   -1.5991   -0.7962    0.0000 C   0  0  0  0  0  0  0  0  0  0  0  0
   -2.9107   -2.8951    0.0000 O   0  0  0  0  0  0  0  0  0  0  0  0
   -2.5234   -3.6236    0.0000 C   0  0  0  0  0  0  0  0  0  0  0  0
   -0.8245   -0.8538    0.0000 O   0  0  0  0  0  0  0  0  0  0  0  0
    1.7561   -0.3159    0.0000 C   0  0  0  0  0  0  0  0  0  0  0  0
    1.6128   -1.1284    0.0000 H   0  0  0  0  0  0  0  0  0  0  0  0
    2.4706   -0.7284    0.0000 H   0  0  0  0  0  0  0  0  0  0  0  0
    2.1686    0.3985    0.0000 H   0  0  0  0  0  0  0  0  0  0  0  0
   -0.1100    0.3837    0.0000 H   0  0  0  0  0  0  0  0  0  0  0  0
   -0.4575   -0.5709    0.0000 H   0  0  0  0  0  0  0  0  0  0  0  0
    1.0416   -0.7284    0.0000 H   0  0  0  0  0  0  0  0  0  0  0  0
    1.4788   -0.8538    0.0000 H   0  0  0  0  0  0  0  0  0  0  0  0
    1.8661   -1.5246    0.0000 H   0  0  0  0  0  0  0  0  0  0  0  0
    1.8661   -2.4072    0.0000 H   0  0  0  0  0  0  0  0  0  0  0  0
    1.4788   -3.0781    0.0000 H   0  0  0  0  0  0  0  0  0  0  0  0
    0.7145   -3.5194    0.0000 H   0  0  0  0  0  0  0  0  0  0  0  0
   -0.0602   -3.5194    0.0000 H   0  0  0  0  0  0  0  0  0  0  0  0
   -0.8245   -3.0781    0.0000 H   0  0  0  0  0  0  0  0  0  0  0  0
   -1.2118   -2.4072    0.0000 H   0  0  0  0  0  0  0  0  0  0  0  0
   -1.2617   -2.9527    0.0000 H   0  0  0  0  0  0  0  0  0  0  0  0
   -3.6853   -1.4383    0.0000 H   0  0  0  0  0  0  0  0  0  0  0  0
   -2.8109   -0.0390    0.0000 H   0  0  0  0  0  0  0  0  0  0  0  0
   -1.1619   -0.0966    0.0000 H   0  0  0  0  0  0  0  0  0  0  0  0
   -3.2518   -4.0109    0.0000 H   0  0  0  0  0  0  0  0  0  0  0  0
   -2.1360   -4.3520    0.0000 H   0  0  0  0  0  0  0  0  0  0  0  0
   -1.7949   -3.2362    0.0000 H   0  0  0  0  0  0  0  0  0  0  0  0
   -0.7097   -0.0368    0.0000 H   0  0  0  0  0  0  0  0  0  0  0  0
  1  2  1  0  0  0  0
  2  3  1  0  0  0  0
  2  4  1  0  0  0  0
  2  5  1  0  0  0  0
  5  6  1  0  0  0  0
  7  6  1  1  0  0  0
  7  8  1  0  0  0  0
  8  9  1  0  0  0  0
  9 10  1  0  0  0  0
 10 11  1  0  0  0  0
 11 12  1  0  0  0  0
  7 12  1  0  0  0  0
 12 13  1  6  0  0  0
 13 14  4  0  0  0  0
 14 15  4  0  0  0  0
 15 16  4  0  0  0  0
 16 17  4  0  0  0  0
 17 18  4  0  0  0  0
 13 18  4  0  0  0  0
 15 19  1  0  0  0  0
 19 20  1  0  0  0  0
 12 21  1  1  0  0  0
  5 22  1  0  0  0  0
 22 23  1  0  0  0  0
 22 24  1  0  0  0  0
 22 25  1  0  0  0  0
  6 26  1  0  0  0  0
  6 27  1  0  0  0  0
  7 28  1  6  0  0  0
  8 29  1  0  0  0  0
  8 30  1  0  0  0  0
  9 31  1  0  0  0  0
  9 32  1  0  0  0  0
 10 33  1  0  0  0  0
 10 34  1  0  0  0  0
 11 35  1  0  0  0  0
 11 36  1  0  0  0  0
 14 37  1  0  0  0  0
 16 38  1  0  0  0  0
 17 39  1  0  0  0  0
 18 40  1  0  0  0  0
 20 41  1  0  0  0  0
 20 42  1  0  0  0  0
 20 43  1  0  0  0  0
 21 44  1  0  0  0  0
M  ISO  6   1   2   3   2   4   2  23   2  24   2  25   2
M  END
$$$$
107
  Mrv0541 12152312282D          

 58 61  0  0  0  0            999 V2000
   -1.4289    0.8250    0.0000 C   0  0  0  0  0  0  0  0  0  0  0  0
   -1.4289    0.0000    0.0000 O   0  0  0  0  0  0  0  0  0  0  0  0
   -0.7145   -0.4125    0.0000 C   0  0  0  0  0  0  0  0  0  0  0  0
   -0.7145   -1.2375    0.0000 C   0  0  0  0  0  0  0  0  0  0  0  0
    0.0000   -1.6500    0.0000 C   0  0  0  0  0  0  0  0  0  0  0  0
    0.7145   -1.2375    0.0000 C   0  0  0  0  0  0  0  0  0  0  0  0
    0.7145   -0.4125    0.0000 C   0  0  0  0  0  0  0  0  0  0  0  0
    0.0000   -0.0000    0.0000 C   0  0  0  0  0  0  0  0  0  0  0  0
    1.4289   -0.0000    0.0000 N   0  0  0  0  0  0  0  0  0  0  0  0
    2.1434   -0.4125    0.0000 C   0  0  0  0  0  0  0  0  0  0  0  0
    2.1434   -1.2375    0.0000 N   0  0  0  0  0  0  0  0  0  0  0  0
    1.4289   -1.6500    0.0000 C   0  0  0  0  0  0  0  0  0  0  0  0
    1.4289   -2.4750    0.0000 N   0  0  0  0  0  0  0  0  0  0  0  0
    2.1434   -2.8875    0.0000 C   0  0  0  0  0  0  0  0  0  0  0  0
    2.8579   -2.4750    0.0000 C   0  0  0  0  0  0  0  0  0  0  0  0
    3.5724   -2.8875    0.0000 C   0  0  0  0  0  0  0  0  0  0  0  0
    3.5724   -3.7125    0.0000 C   0  0  0  0  0  0  0  0  0  0  0  0
    2.8579   -4.1250    0.0000 C   0  0  0  0  0  0  0  0  0  0  0  0
    2.1434   -3.7125    0.0000 C   0  0  0  0  0  0  0  0  0  0  0  0
    4.2868   -4.1250    0.0000 F   0  0  0  0  0  0  0  0  0  0  0  0
    4.2868   -2.4750    0.0000 Cl  0  0  0  0  0  0  0  0  0  0  0  0
   -1.4289   -1.6500    0.0000 N   0  0  0  0  0  0  0  0  0  0  0  0
   -2.1434   -1.2375    0.0000 C   0  0  0  0  0  0  0  0  0  0  0  0
   -2.1434   -0.4125    0.0000 O   0  0  0  0  0  0  0  0  0  0  0  0
   -2.8579   -1.6500    0.0000 C   0  0  0  0  0  0  0  0  0  0  0  0
   -3.5724   -1.2375    0.0000 C   0  0  0  0  0  0  0  0  0  0  0  0
   -4.2868   -1.6500    0.0000 C   0  0  0  0  0  0  0  0  0  0  0  0
   -5.0013   -1.2375    0.0000 N   0  0  0  0  0  0  0  0  0  0  0  0
   -5.7158   -1.6500    0.0000 C   0  0  0  0  0  0  0  0  0  0  0  0
   -6.4302   -1.2375    0.0000 C   0  0  0  0  0  0  0  0  0  0  0  0
   -6.4302   -0.4125    0.0000 C   0  0  0  0  0  0  0  0  0  0  0  0
   -5.7158    0.0000    0.0000 C   0  0  0  0  0  0  0  0  0  0  0  0
   -5.0013   -0.4125    0.0000 C   0  0  0  0  0  0  0  0  0  0  0  0
   -0.6039    0.8250    0.0000 H   0  0  0  0  0  0  0  0  0  0  0  0
   -1.4289    1.6500    0.0000 H   0  0  0  0  0  0  0  0  0  0  0  0
   -2.2539    0.8250    0.0000 H   0  0  0  0  0  0  0  0  0  0  0  0
    0.0000   -2.4750    0.0000 H   0  0  0  0  0  0  0  0  0  0  0  0
    0.0000    0.8250    0.0000 H   0  0  0  0  0  0  0  0  0  0  0  0
    2.8579   -0.0000    0.0000 H   0  0  0  0  0  0  0  0  0  0  0  0
    0.7145   -2.8875    0.0000 H   0  0  0  0  0  0  0  0  0  0  0  0
    2.8579   -1.6500    0.0000 H   0  0  0  0  0  0  0  0  0  0  0  0
    2.8579   -4.9500    0.0000 H   0  0  0  0  0  0  0  0  0  0  0  0
    1.4289   -4.1250    0.0000 H   0  0  0  0  0  0  0  0  0  0  0  0
   -1.4289   -2.4750    0.0000 H   0  0  0  0  0  0  0  0  0  0  0  0
   -2.8579   -2.4750    0.0000 H   0  0  0  0  0  0  0  0  0  0  0  0
   -3.5724   -0.4125    0.0000 H   0  0  0  0  0  0  0  0  0  0  0  0
   -3.8995   -2.3784    0.0000 H   0  0  0  0  0  0  0  0  0  0  0  0
   -4.6741   -2.3784    0.0000 H   0  0  0  0  0  0  0  0  0  0  0  0
   -5.3285   -2.3784    0.0000 H   0  0  0  0  0  0  0  0  0  0  0  0
   -6.1031   -2.3784    0.0000 H   0  0  0  0  0  0  0  0  0  0  0  0
   -6.8674   -1.9371    0.0000 H   0  0  0  0  0  0  0  0  0  0  0  0
   -7.2547   -1.2663    0.0000 H   0  0  0  0  0  0  0  0  0  0  0  0
   -7.2547   -0.3837    0.0000 H   0  0  0  0  0  0  0  0  0  0  0  0
   -6.8674    0.2871    0.0000 H   0  0  0  0  0  0  0  0  0  0  0  0
   -6.1031    0.7284    0.0000 H   0  0  0  0  0  0  0  0  0  0  0  0
   -5.3285    0.7284    0.0000 H   0  0  0  0  0  0  0  0  0  0  0  0
   -4.5641    0.2871    0.0000 H   0  0  0  0  0  0  0  0  0  0  0  0
   -4.1768   -0.3837    0.0000 H   0  0  0  0  0  0  0  0  0  0  0  0
  1  2  1  0  0  0  0
  2  3  1  0  0  0  0
  3  4  4  0  0  0  0
  4  5  4  0  0  0  0
  5  6  4  0  0  0  0
  6  7  4  0  0  0  0
  7  8  4  0  0  0  0
  3  8  4  0  0  0  0
  7  9  4  0  0  0  0
  9 10  4  0  0  0  0
 10 11  4  0  0  0  0
 11 12  4  0  0  0  0
  6 12  4  0  0  0  0
 12 13  1  0  0  0  0
 13 14  1  0  0  0  0
 14 15  4  0  0  0  0
 15 16  4  0  0  0  0
 16 17  4  0  0  0  0
 17 18  4  0  0  0  0
 18 19  4  0  0  0  0
 14 19  4  0  0  0  0
 17 20  1  0  0  0  0
 16 21  1  0  0  0  0
  4 22  1  0  0  0  0
 22 23  1  0  0  0  0
 23 24  2  0  0  0  0
 23 25  1  0  0  0  0
 25 26  2  0  0  0  0
 26 27  1  0  0  0  0
 27 28  1  0  0  0  0
 28 29  1  0  0  0  0
 29 30  1  0  0  0  0
 30 31  1  0  0  0  0
 31 32  1  0  0  0  0
 32 33  1  0  0  0  0
 28 33  1  0  0  0  0
  1 34  1  0  0  0  0
  1 35  1  0  0  0  0
  1 36  1  0  0  0  0
  5 37  1  0  0  0  0
  8 38  1  0  0  0  0
 10 39  1  0  0  0  0
 13 40  1  0  0  0  0
 15 41  1  0  0  0  0
 18 42  1  0  0  0  0
 19 43  1  0  0  0  0
 22 44  1  0  0  0  0
 25 45  1  0  0  0  0
 26 46  1  0  0  0  0
 27 47  1  0  0  0  0
 27 48  1  0  0  0  0
 29 49  1  0  0  0  0
 29 50  1  0  0  0  0
 30 51  1  0  0  0  0
 30 52  1  0  0  0  0
 31 53  1  0  0  0  0
 31 54  1  0  0  0  0
 32 55  1  0  0  0  0
 32 56  1  0  0  0  0
 33 57  1  0  0  0  0
 33 58  1  0  0  0  0
M  END
$$$$
108
  Mrv0541 12152312282D          

 29 28  0  0  0  0            999 V2000
    2.2836    2.1434    0.0000 C   0  0  0  0  0  0  0  0  0  0  0  0
    2.9980    2.5559    0.0000 C   0  0  0  0  0  0  0  0  0  0  0  0
    3.7125    2.1434    0.0000 C   0  0  0  0  0  0  0  0  0  0  0  0
    4.4270    2.5559    0.0000 C   0  0  0  0  0  0  0  0  0  0  0  0
    5.1414    2.1434    0.0000 C   0  0  0  0  0  0  0  0  0  0  0  0
    5.8559    2.5559    0.0000 C   0  0  0  0  0  0  0  0  0  0  0  0
    6.5704    2.1434    0.0000 C   0  0  0  0  0  0  0  0  0  0  0  0
    7.2849    2.5559    0.0000 C   0  0  0  0  0  0  0  0  0  0  0  0
    7.2849    3.3809    0.0000 O   0  0  0  0  0  0  0  0  0  0  0  0
    7.9993    2.1434    0.0000 O   0  0  0  0  0  0  0  0  0  0  0  0
    8.7138    2.5559    0.0000 C   0  0  0  0  0  0  0  0  0  0  0  0
    1.8711    2.8579    0.0000 H   0  0  0  0  0  0  0  0  0  0  0  0
    1.5691    1.7309    0.0000 H   0  0  0  0  0  0  0  0  0  0  0  0
    2.6961    1.4289    0.0000 H   0  0  0  0  0  0  0  0  0  0  0  0
    2.6107    3.2843    0.0000 H   0  0  0  0  0  0  0  0  0  0  0  0
    3.3853    3.2843    0.0000 H   0  0  0  0  0  0  0  0  0  0  0  0
    3.3252    1.4150    0.0000 H   0  0  0  0  0  0  0  0  0  0  0  0
    4.0998    1.4150    0.0000 H   0  0  0  0  0  0  0  0  0  0  0  0
    4.0397    3.2843    0.0000 H   0  0  0  0  0  0  0  0  0  0  0  0
    4.8143    3.2843    0.0000 H   0  0  0  0  0  0  0  0  0  0  0  0
    4.7541    1.4150    0.0000 H   0  0  0  0  0  0  0  0  0  0  0  0
    5.5288    1.4150    0.0000 H   0  0  0  0  0  0  0  0  0  0  0  0
    5.4686    3.2843    0.0000 H   0  0  0  0  0  0  0  0  0  0  0  0
    6.2432    3.2843    0.0000 H   0  0  0  0  0  0  0  0  0  0  0  0
    6.1831    1.4150    0.0000 H   0  0  0  0  0  0  0  0  0  0  0  0
    6.9577    1.4150    0.0000 H   0  0  0  0  0  0  0  0  0  0  0  0
    9.1263    1.8414    0.0000 H   0  0  0  0  0  0  0  0  0  0  0  0
    9.4283    2.9684    0.0000 H   0  0  0  0  0  0  0  0  0  0  0  0
    8.3013    3.2704    0.0000 H   0  0  0  0  0  0  0  0  0  0  0  0
  1  2  1  0  0  0  0
  2  3  1  0  0  0  0
  3  4  1  0  0  0  0
  4  5  1  0  0  0  0
  5  6  1  0  0  0  0
  6  7  1  0  0  0  0
  7  8  1  0  0  0  0
  8  9  2  0  0  0  0
  8 10  1  0  0  0  0
 10 11  1  0  0  0  0
  1 12  1  0  0  0  0
  1 13  1  0  0  0  0
  1 14  1  0  0  0  0
  2 15  1  0  0  0  0
  2 16  1  0  0  0  0
  3 17  1  0  0  0  0
  3 18  1  0  0  0  0
  4 19  1  0  0  0  0
  4 20  1  0  0  0  0
  5 21  1  0  0  0  0
  5 22  1  0  0  0  0
  6 23  1  0  0  0  0
  6 24  1  0  0  0  0
  7 25  1  0  0  0  0
  7 26  1  0  0  0  0
 11 27  1  0  0  0  0
 11 28  1  0  0  0  0
 11 29  1  0  0  0  0
M  END
$$$$
109
  Mrv0541 12152312282D          

 34 33  0  0  0  0            999 V2000
    4.7586    3.5724    0.0000 C   0  0  0  0  0  0  0  0  0  0  0  0
    5.4730    3.9849    0.0000 C   0  0  0  0  0  0  0  0  0  0  0  0
    5.4730    4.8099    0.0000 O   0  0  0  0  0  0  0  0  0  0  0  0
    6.1875    3.5724    0.0000 O   0  0  0  0  0  0  0  0  0  0  0  0
    6.9020    3.9849    0.0000 C   0  0  0  0  0  0  0  0  0  0  0  0
    7.6164    3.5724    0.0000 C   0  0  0  0  0  0  0  0  0  0  0  0
    8.3309    3.9849    0.0000 O   0  0  0  0  0  0  0  0  0  0  0  0
    9.0454    3.5724    0.0000 C   0  0  0  0  0  0  0  0  0  0  0  0
    9.7599    3.9849    0.0000 C   0  0  0  0  0  0  0  0  0  0  0  0
   10.4743    3.5724    0.0000 O   0  0  0  0  0  0  0  0  0  0  0  0
   11.1888    3.9849    0.0000 C   0  0  0  0  0  0  0  0  0  0  0  0
   11.9033    3.5724    0.0000 C   0  0  0  0  0  0  0  0  0  0  0  0
   12.6177    3.9849    0.0000 O   0  0  0  0  0  0  0  0  0  0  0  0
   13.3322    3.5724    0.0000 C   0  0  0  0  0  0  0  0  0  0  0  0
   14.0467    3.9849    0.0000 O   0  0  0  0  0  0  0  0  0  0  0  0
   13.3322    2.7474    0.0000 C   0  0  0  0  0  0  0  0  0  0  0  0
    4.3461    4.2868    0.0000 H   0  0  0  0  0  0  0  0  0  0  0  0
    4.0441    3.1599    0.0000 H   0  0  0  0  0  0  0  0  0  0  0  0
    5.1711    2.8579    0.0000 H   0  0  0  0  0  0  0  0  0  0  0  0
    6.5147    4.7133    0.0000 H   0  0  0  0  0  0  0  0  0  0  0  0
    7.2893    4.7133    0.0000 H   0  0  0  0  0  0  0  0  0  0  0  0
    7.2291    2.8439    0.0000 H   0  0  0  0  0  0  0  0  0  0  0  0
    8.0038    2.8439    0.0000 H   0  0  0  0  0  0  0  0  0  0  0  0
    8.6581    2.8439    0.0000 H   0  0  0  0  0  0  0  0  0  0  0  0
    9.4327    2.8439    0.0000 H   0  0  0  0  0  0  0  0  0  0  0  0
    9.3725    4.7133    0.0000 H   0  0  0  0  0  0  0  0  0  0  0  0
   10.1472    4.7133    0.0000 H   0  0  0  0  0  0  0  0  0  0  0  0
   10.8015    4.7133    0.0000 H   0  0  0  0  0  0  0  0  0  0  0  0
   11.5761    4.7133    0.0000 H   0  0  0  0  0  0  0  0  0  0  0  0
   11.5160    2.8439    0.0000 H   0  0  0  0  0  0  0  0  0  0  0  0
   12.5164    3.0203    0.0000 H   0  0  0  0  0  0  0  0  0  0  0  0
   12.5570    2.4652    0.0000 H   0  0  0  0  0  0  0  0  0  0  0  0
   13.3322    1.9224    0.0000 H   0  0  0  0  0  0  0  0  0  0  0  0
   14.1572    2.7474    0.0000 H   0  0  0  0  0  0  0  0  0  0  0  0
  1  2  1  0  0  0  0
  2  3  2  0  0  0  0
  2  4  1  0  0  0  0
  4  5  1  0  0  0  0
  5  6  1  0  0  0  0
  6  7  1  0  0  0  0
  7  8  1  0  0  0  0
  8  9  1  0  0  0  0
  9 10  1  0  0  0  0
 10 11  1  0  0  0  0
 11 12  1  0  0  0  0
 12 13  1  0  0  0  0
 13 14  1  0  0  0  0
 14 15  2  0  0  0  0
 14 16  1  0  0  0  0
  1 17  1  0  0  0  0
  1 18  1  0  0  0  0
  1 19  1  0  0  0  0
  5 20  1  0  0  0  0
  5 21  1  0  0  0  0
  6 22  1  0  0  0  0
  6 23  1  0  0  0  0
  8 24  1  0  0  0  0
  8 25  1  0  0  0  0
  9 26  1  0  0  0  0
  9 27  1  0  0  0  0
 11 28  1  0  0  0  0
 11 29  1  0  0  0  0
 12 30  1  0  0  0  0
 12 31  1  0  0  0  0
 16 32  1  0  0  0  0
 16 33  1  0  0  0  0
 16 34  1  0  0  0  0
M  END
$$$$
110
  Mrv0541 12152312282D          

 20 19  0  0  0  0            999 V2000
    2.4750   -1.4289    0.0000 C   0  0  0  0  0  0  0  0  0  0  0  0
    3.1895   -1.8414    0.0000 C   0  0  0  0  0  0  0  0  0  0  0  0
    3.9039   -1.4289    0.0000 N   0  0  0  0  0  0  0  0  0  0  0  0
    4.6184   -1.8414    0.0000 C   0  0  0  0  0  0  0  0  0  0  0  0
    5.3329   -1.4289    0.0000 C   0  0  0  0  0  0  0  0  0  0  0  0
    6.0474   -1.8414    0.0000 N   0  0  0  0  0  0  0  0  0  0  0  0
    1.7605   -1.8414    0.0000 N   0  0  0  0  0  0  0  0  0  0  0  0
    2.8623   -0.7005    0.0000 H   0  0  0  0  0  0  0  0  0  0  0  0
    2.0877   -0.7005    0.0000 H   0  0  0  0  0  0  0  0  0  0  0  0
    2.8022   -2.5699    0.0000 H   0  0  0  0  0  0  0  0  0  0  0  0
    3.5768   -2.5699    0.0000 H   0  0  0  0  0  0  0  0  0  0  0  0
    3.9039   -0.6039    0.0000 H   0  0  0  0  0  0  0  0  0  0  0  0
    4.2311   -2.5699    0.0000 H   0  0  0  0  0  0  0  0  0  0  0  0
    5.0057   -2.5699    0.0000 H   0  0  0  0  0  0  0  0  0  0  0  0
    4.9456   -0.7005    0.0000 H   0  0  0  0  0  0  0  0  0  0  0  0
    5.7202   -0.7005    0.0000 H   0  0  0  0  0  0  0  0  0  0  0  0
    6.0474   -2.6664    0.0000 H   0  0  0  0  0  0  0  0  0  0  0  0
    6.7618   -1.4289    0.0000 H   0  0  0  0  0  0  0  0  0  0  0  0
    1.0461   -1.4289    0.0000 H   0  0  0  0  0  0  0  0  0  0  0  0
    1.7605   -2.6664    0.0000 H   0  0  0  0  0  0  0  0  0  0  0  0
  1  2  1  0  0  0  0
  2  3  1  0  0  0  0
  3  4  1  0  0  0  0
  4  5  1  0  0  0  0
  5  6  1  0  0  0  0
  1  7  1  0  0  0  0
  1  8  1  0  0  0  0
  1  9  1  0  0  0  0
  2 10  1  0  0  0  0
  2 11  1  0  0  0  0
  3 12  1  0  0  0  0
  4 13  1  0  0  0  0
  4 14  1  0  0  0  0
  5 15  1  0  0  0  0
  5 16  1  0  0  0  0
  6 17  1  0  0  0  0
  6 18  1  0  0  0  0
  7 19  1  0  0  0  0
  7 20  1  0  0  0  0
M  END
$$$$
111
  Mrv0541 12152312282D          

 28 29  0  0  0  0            999 V2000
   -0.5837    0.0165    0.0000 C   0  0  0  0  0  0  0  0  0  0  0  0
   -0.1712   -0.6979    0.0000 C   0  0  0  0  0  0  0  0  0  0  0  0
    0.6538   -0.6979    0.0000 C   0  0  0  0  0  0  0  0  0  0  0  0
    1.1387   -0.0305    0.0000 C   0  0  0  0  0  0  0  0  0  0  0  0
    1.9233   -0.2854    0.0000 C   0  0  0  0  0  0  0  0  0  0  0  0
    2.6378    0.1271    0.0000 C   0  0  0  0  0  0  0  0  0  0  0  0
    3.3523   -0.2854    0.0000 C   0  0  0  0  0  0  0  0  0  0  0  0
    3.3523   -1.1104    0.0000 C   0  0  0  0  0  0  0  0  0  0  0  0
    2.6378   -1.5229    0.0000 C   0  0  0  0  0  0  0  0  0  0  0  0
    1.9233   -1.1104    0.0000 C   0  0  0  0  0  0  0  0  0  0  0  0
    1.1387   -1.3654    0.0000 S   0  0  0  0  0  0  0  0  0  0  0  0
   -0.5837   -1.4124    0.0000 N   0  0  0  0  0  0  0  0  0  0  0  0
   -1.4087   -1.4124    0.0000 C   0  0  0  0  0  0  0  0  0  0  0  0
   -1.8212   -2.1269    0.0000 O   0  0  0  0  0  0  0  0  0  0  0  0
   -1.8212   -0.6979    0.0000 N   0  0  0  0  0  0  0  0  0  0  0  0
   -0.1712   -2.1269    0.0000 O   0  0  0  0  0  0  0  0  0  0  0  0
    0.1308    0.4290    0.0000 H   0  0  0  0  0  0  0  0  0  0  0  0
   -0.9962    0.7310    0.0000 H   0  0  0  0  0  0  0  0  0  0  0  0
   -1.2982   -0.3960    0.0000 H   0  0  0  0  0  0  0  0  0  0  0  0
    0.2413    0.0165    0.0000 H   0  0  0  0  0  0  0  0  0  0  0  0
    0.8838    0.7541    0.0000 H   0  0  0  0  0  0  0  0  0  0  0  0
    2.6378    0.9521    0.0000 H   0  0  0  0  0  0  0  0  0  0  0  0
    4.0668    0.1271    0.0000 H   0  0  0  0  0  0  0  0  0  0  0  0
    4.0668   -1.5229    0.0000 H   0  0  0  0  0  0  0  0  0  0  0  0
    2.6378   -2.3479    0.0000 H   0  0  0  0  0  0  0  0  0  0  0  0
   -1.4087    0.0165    0.0000 H   0  0  0  0  0  0  0  0  0  0  0  0
   -2.6462   -0.6979    0.0000 H   0  0  0  0  0  0  0  0  0  0  0  0
   -0.5837   -2.8414    0.0000 H   0  0  0  0  0  0  0  0  0  0  0  0
  1  2  1  0  0  0  0
  2  3  1  0  0  0  0
  3  4  4  0  0  0  0
  4  5  4  0  0  0  0
  5  6  4  0  0  0  0
  6  7  4  0  0  0  0
  7  8  4  0  0  0  0
  8  9  4  0  0  0  0
  9 10  4  0  0  0  0
  5 10  4  0  0  0  0
 10 11  4  0  0  0  0
  3 11  4  0  0  0  0
  2 12  1  0  0  0  0
 12 13  1  0  0  0  0
 13 14  2  0  0  0  0
 13 15  1  0  0  0  0
 12 16  1  0  0  0  0
  1 17  1  0  0  0  0
  1 18  1  0  0  0  0
  1 19  1  0  0  0  0
  2 20  1  0  0  0  0
  4 21  1  0  0  0  0
  6 22  1  0  0  0  0
  7 23  1  0  0  0  0
  8 24  1  0  0  0  0
  9 25  1  0  0  0  0
 15 26  1  0  0  0  0
 15 27  1  0  0  0  0
 16 28  1  0  0  0  0
M  END
$$$$
112
  Mrv0541 12152312282D          

 34 33  0  0  0  0            999 V2000
    2.2836    2.1434    0.0000 C   0  0  0  0  0  0  0  0  0  0  0  0
    2.9980    2.5559    0.0000 C   0  0  0  0  0  0  0  0  0  0  0  0
    3.7125    2.1434    0.0000 C   0  0  0  0  0  0  0  0  0  0  0  0
    4.4270    2.5559    0.0000 C   0  0  0  0  0  0  0  0  0  0  0  0
    5.1414    2.1434    0.0000 N   0  0  0  0  0  0  0  0  0  0  0  0
    5.1414    1.3184    0.0000 C   0  0  0  0  0  0  0  0  0  0  0  0
    5.8559    0.9059    0.0000 C   0  0  0  0  0  0  0  0  0  0  0  0
    5.8559    2.5559    0.0000 C   0  0  0  0  0  0  0  0  0  0  0  0
    5.8559    3.3809    0.0000 O   0  0  0  0  0  0  0  0  0  0  0  0
    6.5704    2.1434    0.0000 S   0  0  0  0  0  0  0  0  0  0  0  0
    7.2849    2.5559    0.0000 C   0  0  0  0  0  0  0  0  0  0  0  0
    7.9993    2.1434    0.0000 C   0  0  0  0  0  0  0  0  0  0  0  0
    8.7138    2.5559    0.0000 C   0  0  0  0  0  0  0  0  0  0  0  0
    1.8711    2.8579    0.0000 H   0  0  0  0  0  0  0  0  0  0  0  0
    1.5691    1.7309    0.0000 H   0  0  0  0  0  0  0  0  0  0  0  0
    2.6961    1.4289    0.0000 H   0  0  0  0  0  0  0  0  0  0  0  0
    2.6107    3.2843    0.0000 H   0  0  0  0  0  0  0  0  0  0  0  0
    3.3853    3.2843    0.0000 H   0  0  0  0  0  0  0  0  0  0  0  0
    3.3252    1.4150    0.0000 H   0  0  0  0  0  0  0  0  0  0  0  0
    4.3256    1.5914    0.0000 H   0  0  0  0  0  0  0  0  0  0  0  0
    4.0397    3.2843    0.0000 H   0  0  0  0  0  0  0  0  0  0  0  0
    4.8143    3.2843    0.0000 H   0  0  0  0  0  0  0  0  0  0  0  0
    4.3765    1.0094    0.0000 H   0  0  0  0  0  0  0  0  0  0  0  0
    4.7043    0.6188    0.0000 H   0  0  0  0  0  0  0  0  0  0  0  0
    5.4434    0.1914    0.0000 H   0  0  0  0  0  0  0  0  0  0  0  0
    6.5704    0.4934    0.0000 H   0  0  0  0  0  0  0  0  0  0  0  0
    6.2684    1.6204    0.0000 H   0  0  0  0  0  0  0  0  0  0  0  0
    6.8975    3.2843    0.0000 H   0  0  0  0  0  0  0  0  0  0  0  0
    7.6722    3.2843    0.0000 H   0  0  0  0  0  0  0  0  0  0  0  0
    7.6120    1.4150    0.0000 H   0  0  0  0  0  0  0  0  0  0  0  0
    8.3866    1.4150    0.0000 H   0  0  0  0  0  0  0  0  0  0  0  0
    9.1263    1.8414    0.0000 H   0  0  0  0  0  0  0  0  0  0  0  0
    9.4283    2.9684    0.0000 H   0  0  0  0  0  0  0  0  0  0  0  0
    8.3013    3.2704    0.0000 H   0  0  0  0  0  0  0  0  0  0  0  0
  1  2  1  0  0  0  0
  2  3  1  0  0  0  0
  3  4  1  0  0  0  0
  4  5  1  0  0  0  0
  5  6  1  0  0  0  0
  6  7  1  0  0  0  0
  5  8  1  0  0  0  0
  8  9  2  0  0  0  0
  8 10  1  0  0  0  0
 10 11  1  0  0  0  0
 11 12  1  0  0  0  0
 12 13  1  0  0  0  0
  1 14  1  0  0  0  0
  1 15  1  0  0  0  0
  1 16  1  0  0  0  0
  2 17  1  0  0  0  0
  2 18  1  0  0  0  0
  3 19  1  0  0  0  0
  3 20  1  0  0  0  0
  4 21  1  0  0  0  0
  4 22  1  0  0  0  0
  6 23  1  0  0  0  0
  6 24  1  0  0  0  0
  7 25  1  0  0  0  0
  7 26  1  0  0  0  0
  7 27  1  0  0  0  0
 11 28  1  0  0  0  0
 11 29  1  0  0  0  0
 12 30  1  0  0  0  0
 12 31  1  0  0  0  0
 13 32  1  0  0  0  0
 13 33  1  0  0  0  0
 13 34  1  0  0  0  0
M  END
$$$$
113
  Mrv0541 12152312282D          

 47 50  0  0  0  0            999 V2000
    0.7145    2.0625    0.0000 C   0  0  0  0  0  0  0  0  0  0  0  0
    0.7145    1.2375    0.0000 C   0  0  0  0  0  0  0  0  0  0  0  0
    1.4289    0.8250    0.0000 C   0  0  0  0  0  0  0  0  0  0  0  0
    1.4289   -0.0000    0.0000 C   0  0  0  0  0  0  0  0  0  0  0  0
    0.7145   -0.4125    0.0000 C   0  0  0  0  0  0  0  0  0  0  0  0
    0.0000   -0.0000    0.0000 C   0  0  0  0  0  0  0  0  0  0  0  0
    0.0000    0.8250    0.0000 C   0  0  0  0  0  0  0  0  0  0  0  0
    0.7145   -1.2375    0.0000 C   0  0  0  0  0  0  0  0  0  0  0  0
    1.3819   -1.7224    0.0000 C   0  0  0  0  0  0  0  0  0  0  0  0
    1.1270   -2.5070    0.0000 C   0  0  0  0  0  0  0  0  0  0  0  0
    0.3020   -2.5070    0.0000 N   0  0  0  0  0  0  0  0  0  0  0  0
    0.0470   -1.7224    0.0000 N   0  0  0  0  0  0  0  0  0  0  0  0
   -0.7376   -1.4675    0.0000 C   0  0  0  0  0  0  0  0  0  0  0  0
   -1.3507   -2.0195    0.0000 C   0  0  0  0  0  0  0  0  0  0  0  0
   -2.1353   -1.7646    0.0000 C   0  0  0  0  0  0  0  0  0  0  0  0
   -2.3068   -0.9576    0.0000 C   0  0  0  0  0  0  0  0  0  0  0  0
   -1.6937   -0.4056    0.0000 C   0  0  0  0  0  0  0  0  0  0  0  0
   -0.9091   -0.6605    0.0000 C   0  0  0  0  0  0  0  0  0  0  0  0
   -3.0915   -0.7027    0.0000 S   0  0  0  0  0  0  0  0  0  0  0  0
   -3.8761   -0.4477    0.0000 O   0  0  0  0  0  0  0  0  0  0  0  0
   -2.8365    0.0820    0.0000 O   0  0  0  0  0  0  0  0  0  0  0  0
   -3.3464   -1.4873    0.0000 N   0  0  0  0  0  0  0  0  0  0  0  0
    1.6119   -3.1745    0.0000 C   0  0  0  0  0  0  0  0  0  0  0  0
    2.4324   -3.0882    0.0000 C   0  0  0  0  0  0  0  0  0  0  0  0
    2.9173   -3.7557    0.0000 C   0  0  0  0  0  0  0  0  0  0  0  0
    2.5817   -4.5094    0.0000 C   0  0  0  0  0  0  0  0  0  0  0  0
    1.7613   -4.5956    0.0000 C   0  0  0  0  0  0  0  0  0  0  0  0
    1.2763   -3.9282    0.0000 C   0  0  0  0  0  0  0  0  0  0  0  0
    1.5395    2.0625    0.0000 H   0  0  0  0  0  0  0  0  0  0  0  0
    0.7145    2.8875    0.0000 H   0  0  0  0  0  0  0  0  0  0  0  0
   -0.1105    2.0625    0.0000 H   0  0  0  0  0  0  0  0  0  0  0  0
    2.1434    1.2375    0.0000 H   0  0  0  0  0  0  0  0  0  0  0  0
    2.1434   -0.4125    0.0000 H   0  0  0  0  0  0  0  0  0  0  0  0
   -0.7145   -0.4125    0.0000 H   0  0  0  0  0  0  0  0  0  0  0  0
   -0.7145    1.2375    0.0000 H   0  0  0  0  0  0  0  0  0  0  0  0
    2.1665   -1.4675    0.0000 H   0  0  0  0  0  0  0  0  0  0  0  0
   -1.1792   -2.8265    0.0000 H   0  0  0  0  0  0  0  0  0  0  0  0
   -2.5226   -2.4930    0.0000 H   0  0  0  0  0  0  0  0  0  0  0  0
   -1.8653    0.4014    0.0000 H   0  0  0  0  0  0  0  0  0  0  0  0
   -0.2960   -0.1085    0.0000 H   0  0  0  0  0  0  0  0  0  0  0  0
   -4.1534   -1.6588    0.0000 H   0  0  0  0  0  0  0  0  0  0  0  0
   -2.6180   -1.8746    0.0000 H   0  0  0  0  0  0  0  0  0  0  0  0
    2.7679   -2.3346    0.0000 H   0  0  0  0  0  0  0  0  0  0  0  0
    3.7378   -3.6695    0.0000 H   0  0  0  0  0  0  0  0  0  0  0  0
    3.0667   -5.1768    0.0000 H   0  0  0  0  0  0  0  0  0  0  0  0
    1.4257   -5.3493    0.0000 H   0  0  0  0  0  0  0  0  0  0  0  0
    0.4559   -4.0144    0.0000 H   0  0  0  0  0  0  0  0  0  0  0  0
  1  2  1  0  0  0  0
  2  3  4  0  0  0  0
  3  4  4  0  0  0  0
  4  5  4  0  0  0  0
  5  6  4  0  0  0  0
  6  7  4  0  0  0  0
  2  7  4  0  0  0  0
  5  8  1  0  0  0  0
  8  9  4  0  0  0  0
  9 10  4  0  0  0  0
 10 11  4  0  0  0  0
 11 12  4  0  0  0  0
  8 12  4  0  0  0  0
 12 13  1  0  0  0  0
 13 14  4  0  0  0  0
 14 15  4  0  0  0  0
 15 16  4  0  0  0  0
 16 17  4  0  0  0  0
 17 18  4  0  0  0  0
 13 18  4  0  0  0  0
 16 19  1  0  0  0  0
 19 20  2  0  0  0  0
 19 21  2  0  0  0  0
 19 22  1  0  0  0  0
 10 23  1  0  0  0  0
 23 24  4  0  0  0  0
 24 25  4  0  0  0  0
 25 26  4  0  0  0  0
 26 27  4  0  0  0  0
 27 28  4  0  0  0  0
 23 28  4  0  0  0  0
  1 29  1  0  0  0  0
  1 30  1  0  0  0  0
  1 31  1  0  0  0  0
  3 32  1  0  0  0  0
  4 33  1  0  0  0  0
  6 34  1  0  0  0  0
  7 35  1  0  0  0  0
  9 36  1  0  0  0  0
 14 37  1  0  0  0  0
 15 38  1  0  0  0  0
 17 39  1  0  0  0  0
 18 40  1  0  0  0  0
 22 41  1  0  0  0  0
 22 42  1  0  0  0  0
 24 43  1  0  0  0  0
 25 44  1  0  0  0  0
 26 45  1  0  0  0  0
 27 46  1  0  0  0  0
 28 47  1  0  0  0  0
M  END
$$$$
114
  Mrv0541 12152312282D          

 26 25  0  0  0  0            999 V2000
    1.0461    1.4289    0.0000 C   0  0  0  0  0  0  0  0  0  0  0  0
    1.7605    1.8414    0.0000 C   0  0  0  0  0  0  0  0  0  0  0  0
    2.4750    1.4289    0.0000 C   0  0  0  0  0  0  0  0  0  0  0  0
    3.1895    1.8414    0.0000 C   0  0  0  0  0  0  0  0  0  0  0  0
    3.9039    1.4289    0.0000 C   0  0  0  0  0  0  0  0  0  0  0  0
    4.6184    1.8414    0.0000 C   0  0  0  0  0  0  0  0  0  0  0  0
    5.3329    1.4289    0.0000 C   0  0  0  0  0  0  0  0  0  0  0  0
    6.0474    1.8414    0.0000 C   0  0  0  0  0  0  0  0  0  0  0  0
    0.6336    2.1434    0.0000 H   0  0  0  0  0  0  0  0  0  0  0  0
    0.3316    1.0164    0.0000 H   0  0  0  0  0  0  0  0  0  0  0  0
    1.4586    0.7145    0.0000 H   0  0  0  0  0  0  0  0  0  0  0  0
    1.3732    2.5699    0.0000 H   0  0  0  0  0  0  0  0  0  0  0  0
    2.1478    2.5699    0.0000 H   0  0  0  0  0  0  0  0  0  0  0  0
    2.0877    0.7005    0.0000 H   0  0  0  0  0  0  0  0  0  0  0  0
    2.8623    0.7005    0.0000 H   0  0  0  0  0  0  0  0  0  0  0  0
    2.8022    2.5699    0.0000 H   0  0  0  0  0  0  0  0  0  0  0  0
    3.5768    2.5699    0.0000 H   0  0  0  0  0  0  0  0  0  0  0  0
    3.5166    0.7005    0.0000 H   0  0  0  0  0  0  0  0  0  0  0  0
    4.2913    0.7005    0.0000 H   0  0  0  0  0  0  0  0  0  0  0  0
    4.2311    2.5699    0.0000 H   0  0  0  0  0  0  0  0  0  0  0  0
    5.0057    2.5699    0.0000 H   0  0  0  0  0  0  0  0  0  0  0  0
    4.9456    0.7005    0.0000 H   0  0  0  0  0  0  0  0  0  0  0  0
    5.7202    0.7005    0.0000 H   0  0  0  0  0  0  0  0  0  0  0  0
    6.4599    1.1270    0.0000 H   0  0  0  0  0  0  0  0  0  0  0  0
    6.7618    2.2539    0.0000 H   0  0  0  0  0  0  0  0  0  0  0  0
    5.6349    2.5559    0.0000 H   0  0  0  0  0  0  0  0  0  0  0  0
  1  2  1  0  0  0  0
  2  3  1  0  0  0  0
  3  4  1  0  0  0  0
  4  5  1  0  0  0  0
  5  6  1  0  0  0  0
  6  7  1  0  0  0  0
  7  8  1  0  0  0  0
  1  9  1  0  0  0  0
  1 10  1  0  0  0  0
  1 11  1  0  0  0  0
  2 12  1  0  0  0  0
  2 13  1  0  0  0  0
  3 14  1  0  0  0  0
  3 15  1  0  0  0  0
  4 16  1  0  0  0  0
  4 17  1  0  0  0  0
  5 18  1  0  0  0  0
  5 19  1  0  0  0  0
  6 20  1  0  0  0  0
  6 21  1  0  0  0  0
  7 22  1  0  0  0  0
  7 23  1  0  0  0  0
  8 24  1  0  0  0  0
  8 25  1  0  0  0  0
  8 26  1  0  0  0  0
M  END
$$$$
115
  Mrv0541 12152312282D          

 22 21  0  0  0  0            999 V2000
    1.0461    1.4289    0.0000 C   0  0  0  0  0  0  0  0  0  0  0  0
    1.7605    1.8414    0.0000 C   0  0  0  0  0  0  0  0  0  0  0  0
    2.4750    1.4289    0.0000 C   0  0  0  0  0  0  0  0  0  0  0  0
    3.1895    1.8414    0.0000 C   0  0  0  0  0  0  0  0  0  0  0  0
    3.9039    1.4289    0.0000 O   0  0  0  0  0  0  0  0  0  0  0  0
    4.6184    1.8414    0.0000 C   0  0  0  0  0  0  0  0  0  0  0  0
    5.3329    1.4289    0.0000 C   0  0  0  0  0  0  0  0  0  0  0  0
    6.0474    1.8414    0.0000 O   0  0  0  0  0  0  0  0  0  0  0  0
    0.6336    2.1434    0.0000 H   0  0  0  0  0  0  0  0  0  0  0  0
    0.3316    1.0164    0.0000 H   0  0  0  0  0  0  0  0  0  0  0  0
    1.4586    0.7145    0.0000 H   0  0  0  0  0  0  0  0  0  0  0  0
    1.3732    2.5699    0.0000 H   0  0  0  0  0  0  0  0  0  0  0  0
    2.1478    2.5699    0.0000 H   0  0  0  0  0  0  0  0  0  0  0  0
    2.0877    0.7005    0.0000 H   0  0  0  0  0  0  0  0  0  0  0  0
    2.8623    0.7005    0.0000 H   0  0  0  0  0  0  0  0  0  0  0  0
    2.8022    2.5699    0.0000 H   0  0  0  0  0  0  0  0  0  0  0  0
    3.5768    2.5699    0.0000 H   0  0  0  0  0  0  0  0  0  0  0  0
    4.2311    2.5699    0.0000 H   0  0  0  0  0  0  0  0  0  0  0  0
    5.0057    2.5699    0.0000 H   0  0  0  0  0  0  0  0  0  0  0  0
    4.9456    0.7005    0.0000 H   0  0  0  0  0  0  0  0  0  0  0  0
    5.7202    0.7005    0.0000 H   0  0  0  0  0  0  0  0  0  0  0  0
    6.7618    1.4289    0.0000 H   0  0  0  0  0  0  0  0  0  0  0  0
  1  2  1  0  0  0  0
  2  3  1  0  0  0  0
  3  4  1  0  0  0  0
  4  5  1  0  0  0  0
  5  6  1  0  0  0  0
  6  7  1  0  0  0  0
  7  8  1  0  0  0  0
  1  9  1  0  0  0  0
  1 10  1  0  0  0  0
  1 11  1  0  0  0  0
  2 12  1  0  0  0  0
  2 13  1  0  0  0  0
  3 14  1  0  0  0  0
  3 15  1  0  0  0  0
  4 16  1  0  0  0  0
  4 17  1  0  0  0  0
  6 18  1  0  0  0  0
  6 19  1  0  0  0  0
  7 20  1  0  0  0  0
  7 21  1  0  0  0  0
  8 22  1  0  0  0  0
M  END
$$$$
116
  Mrv0541 12152312282D          

 58 60  0  0  0  0            999 V2000
   -0.6078   -0.4741    0.0000 C   0  0  0  0  0  0  0  0  0  0  0  0
   -0.6078   -1.2991    0.0000 C   0  0  0  0  0  0  0  0  0  0  0  0
    0.0597   -1.7840    0.0000 N   0  0  0  0  0  0  0  0  0  0  0  0
   -0.1953   -2.5687    0.0000 N   0  0  0  0  0  0  0  0  0  0  0  0
   -1.0203   -2.5687    0.0000 C   0  0  0  0  0  0  0  0  0  0  0  0
   -1.2752   -1.7840    0.0000 C   0  0  0  0  0  0  0  0  0  0  0  0
   -2.0598   -1.5291    0.0000 C   0  0  0  0  0  0  0  0  0  0  0  0
   -2.2314   -0.7221    0.0000 N   0  0  0  0  0  0  0  0  0  0  0  0
   -3.0160   -0.4672    0.0000 O   0  0  0  0  0  0  0  0  0  0  0  0
   -3.1875    0.3398    0.0000 C   0  0  0  0  0  0  0  0  0  0  0  0
   -3.9721    0.5947    0.0000 C   0  0  0  0  0  0  0  0  0  0  0  0
   -4.5852    0.0427    0.0000 C   0  0  0  0  0  0  0  0  0  0  0  0
   -5.3698    0.2976    0.0000 C   0  0  0  0  0  0  0  0  0  0  0  0
   -5.5414    1.1046    0.0000 C   0  0  0  0  0  0  0  0  0  0  0  0
   -4.9283    1.6566    0.0000 C   0  0  0  0  0  0  0  0  0  0  0  0
   -4.1437    1.4017    0.0000 C   0  0  0  0  0  0  0  0  0  0  0  0
   -6.3260    1.3595    0.0000 C   0  0  0  0  0  0  0  0  0  0  0  0
   -6.9391    0.8075    0.0000 O   0  0  0  0  0  0  0  0  0  0  0  0
   -6.4975    2.1665    0.0000 O   0  0  0  0  0  0  0  0  0  0  0  0
   -7.2821    2.4215    0.0000 C   0  0  0  0  0  0  0  0  0  0  0  0
   -8.0668    2.6764    0.0000 C   0  0  0  0  0  0  0  0  0  0  0  0
   -7.5371    1.6368    0.0000 C   0  0  0  0  0  0  0  0  0  0  0  0
   -7.0272    3.2061    0.0000 C   0  0  0  0  0  0  0  0  0  0  0  0
   -1.5052   -3.2361    0.0000 O   0  0  0  0  0  0  0  0  0  0  0  0
   -1.1696   -3.9898    0.0000 C   0  0  0  0  0  0  0  0  0  0  0  0
   -0.3491   -4.0760    0.0000 C   0  0  0  0  0  0  0  0  0  0  0  0
   -0.0136   -4.8297    0.0000 C   0  0  0  0  0  0  0  0  0  0  0  0
   -0.4985   -5.4971    0.0000 C   0  0  0  0  0  0  0  0  0  0  0  0
   -1.3190   -5.4109    0.0000 C   0  0  0  0  0  0  0  0  0  0  0  0
   -1.6546   -4.6572    0.0000 C   0  0  0  0  0  0  0  0  0  0  0  0
    0.2897   -3.2361    0.0000 C   0  0  0  0  0  0  0  0  0  0  0  0
    0.2172   -0.4741    0.0000 H   0  0  0  0  0  0  0  0  0  0  0  0
   -0.6078    0.3509    0.0000 H   0  0  0  0  0  0  0  0  0  0  0  0
   -1.4328   -0.4741    0.0000 H   0  0  0  0  0  0  0  0  0  0  0  0
   -2.6729   -2.0811    0.0000 H   0  0  0  0  0  0  0  0  0  0  0  0
   -2.3870    0.5394    0.0000 H   0  0  0  0  0  0  0  0  0  0  0  0
   -2.9053    1.1150    0.0000 H   0  0  0  0  0  0  0  0  0  0  0  0
   -4.4137   -0.7643    0.0000 H   0  0  0  0  0  0  0  0  0  0  0  0
   -5.9829   -0.2544    0.0000 H   0  0  0  0  0  0  0  0  0  0  0  0
   -5.0998    2.4636    0.0000 H   0  0  0  0  0  0  0  0  0  0  0  0
   -3.5306    1.9537    0.0000 H   0  0  0  0  0  0  0  0  0  0  0  0
   -8.0956    3.5009    0.0000 H   0  0  0  0  0  0  0  0  0  0  0  0
   -8.8514    2.9313    0.0000 H   0  0  0  0  0  0  0  0  0  0  0  0
   -8.0380    1.8519    0.0000 H   0  0  0  0  0  0  0  0  0  0  0  0
   -8.3616    1.6080    0.0000 H   0  0  0  0  0  0  0  0  0  0  0  0
   -7.7920    0.8522    0.0000 H   0  0  0  0  0  0  0  0  0  0  0  0
   -6.7525    1.3819    0.0000 H   0  0  0  0  0  0  0  0  0  0  0  0
   -6.2426    2.9511    0.0000 H   0  0  0  0  0  0  0  0  0  0  0  0
   -6.7723    3.9907    0.0000 H   0  0  0  0  0  0  0  0  0  0  0  0
   -7.8517    3.1773    0.0000 H   0  0  0  0  0  0  0  0  0  0  0  0
    0.3348   -3.6147    0.0000 H   0  0  0  0  0  0  0  0  0  0  0  0
    0.8069   -4.9159    0.0000 H   0  0  0  0  0  0  0  0  0  0  0  0
   -0.1630   -6.2508    0.0000 H   0  0  0  0  0  0  0  0  0  0  0  0
   -1.8039   -6.0783    0.0000 H   0  0  0  0  0  0  0  0  0  0  0  0
   -2.4750   -4.5710    0.0000 H   0  0  0  0  0  0  0  0  0  0  0  0
   -0.3778   -3.7210    0.0000 H   0  0  0  0  0  0  0  0  0  0  0  0
    0.7746   -3.9035    0.0000 H   0  0  0  0  0  0  0  0  0  0  0  0
    0.9571   -2.7512    0.0000 H   0  0  0  0  0  0  0  0  0  0  0  0
  1  2  1  0  0  0  0
  2  3  4  0  0  0  0
  3  4  4  0  0  0  0
  4  5  4  0  0  0  0
  5  6  4  0  0  0  0
  2  6  4  0  0  0  0
  6  7  1  0  0  0  0
  7  8  2  0  0  0  0
  8  9  1  0  0  0  0
  9 10  1  0  0  0  0
 10 11  1  0  0  0  0
 11 12  4  0  0  0  0
 12 13  4  0  0  0  0
 13 14  4  0  0  0  0
 14 15  4  0  0  0  0
 15 16  4  0  0  0  0
 11 16  4  0  0  0  0
 14 17  1  0  0  0  0
 17 18  2  0  0  0  0
 17 19  1  0  0  0  0
 19 20  1  0  0  0  0
 20 21  1  0  0  0  0
 20 22  1  0  0  0  0
 20 23  1  0  0  0  0
  5 24  1  0  0  0  0
 24 25  1  0  0  0  0
 25 26  4  0  0  0  0
 26 27  4  0  0  0  0
 27 28  4  0  0  0  0
 28 29  4  0  0  0  0
 29 30  4  0  0  0  0
 25 30  4  0  0  0  0
  4 31  1  0  0  0  0
  1 32  1  0  0  0  0
  1 33  1  0  0  0  0
  1 34  1  0  0  0  0
  7 35  1  0  0  0  0
 10 36  1  0  0  0  0
 10 37  1  0  0  0  0
 12 38  1  0  0  0  0
 13 39  1  0  0  0  0
 15 40  1  0  0  0  0
 16 41  1  0  0  0  0
 21 42  1  0  0  0  0
 21 43  1  0  0  0  0
 21 44  1  0  0  0  0
 22 45  1  0  0  0  0
 22 46  1  0  0  0  0
 22 47  1  0  0  0  0
 23 48  1  0  0  0  0
 23 49  1  0  0  0  0
 23 50  1  0  0  0  0
 26 51  1  0  0  0  0
 27 52  1  0  0  0  0
 28 53  1  0  0  0  0
 29 54  1  0  0  0  0
 30 55  1  0  0  0  0
 31 56  1  0  0  0  0
 31 57  1  0  0  0  0
 31 58  1  0  0  0  0
M  END
$$$$
117
  Mrv0541 12152312282D          

 41 40  0  0  0  0            999 V2000
    4.7586    3.5724    0.0000 C   0  0  0  0  0  0  0  0  0  0  0  0
    5.4730    3.9849    0.0000 C   0  0  0  0  0  0  0  0  0  0  0  0
    6.1875    3.5724    0.0000 C   0  0  0  0  0  0  0  0  0  0  0  0
    6.9020    3.9849    0.0000 C   0  0  0  0  0  0  0  0  0  0  0  0
    7.6164    3.5724    0.0000 C   0  0  0  0  0  0  0  0  0  0  0  0
    8.3309    3.9849    0.0000 C   0  0  0  0  0  0  0  0  0  0  0  0
    9.0454    3.5724    0.0000 C   0  0  0  0  0  0  0  0  0  0  0  0
    9.7599    3.9849    0.0000 C   0  0  0  0  0  0  0  0  0  0  0  0
   10.4743    3.5724    0.0000 C   0  0  0  0  0  0  0  0  0  0  0  0
   11.1888    3.9849    0.0000 C   0  0  0  0  0  0  0  0  0  0  0  0
   11.9033    3.5724    0.0000 C   0  0  0  0  0  0  0  0  0  0  0  0
   12.6177    3.9849    0.0000 C   0  0  0  0  0  0  0  0  0  0  0  0
   12.6177    4.8099    0.0000 O   0  0  0  0  0  0  0  0  0  0  0  0
   13.3322    3.5724    0.0000 O   0  0  0  0  0  0  0  0  0  0  0  0
   14.0467    3.9849    0.0000 C   0  0  0  0  0  0  0  0  0  0  0  0
    4.3461    4.2868    0.0000 H   0  0  0  0  0  0  0  0  0  0  0  0
    4.0441    3.1599    0.0000 H   0  0  0  0  0  0  0  0  0  0  0  0
    5.1711    2.8579    0.0000 H   0  0  0  0  0  0  0  0  0  0  0  0
    5.0857    4.7133    0.0000 H   0  0  0  0  0  0  0  0  0  0  0  0
    5.8603    4.7133    0.0000 H   0  0  0  0  0  0  0  0  0  0  0  0
    5.8002    2.8439    0.0000 H   0  0  0  0  0  0  0  0  0  0  0  0
    6.5748    2.8439    0.0000 H   0  0  0  0  0  0  0  0  0  0  0  0
    6.5147    4.7133    0.0000 H   0  0  0  0  0  0  0  0  0  0  0  0
    7.2893    4.7133    0.0000 H   0  0  0  0  0  0  0  0  0  0  0  0
    7.2291    2.8439    0.0000 H   0  0  0  0  0  0  0  0  0  0  0  0
    8.0038    2.8439    0.0000 H   0  0  0  0  0  0  0  0  0  0  0  0
    7.9436    4.7133    0.0000 H   0  0  0  0  0  0  0  0  0  0  0  0
    8.7182    4.7133    0.0000 H   0  0  0  0  0  0  0  0  0  0  0  0
    8.6581    2.8439    0.0000 H   0  0  0  0  0  0  0  0  0  0  0  0
    9.4327    2.8439    0.0000 H   0  0  0  0  0  0  0  0  0  0  0  0
    9.3725    4.7133    0.0000 H   0  0  0  0  0  0  0  0  0  0  0  0
   10.1472    4.7133    0.0000 H   0  0  0  0  0  0  0  0  0  0  0  0
   10.0870    2.8439    0.0000 H   0  0  0  0  0  0  0  0  0  0  0  0
   10.8616    2.8439    0.0000 H   0  0  0  0  0  0  0  0  0  0  0  0
   10.8015    4.7133    0.0000 H   0  0  0  0  0  0  0  0  0  0  0  0
   11.5761    4.7133    0.0000 H   0  0  0  0  0  0  0  0  0  0  0  0
   11.5160    2.8439    0.0000 H   0  0  0  0  0  0  0  0  0  0  0  0
   12.2906    2.8439    0.0000 H   0  0  0  0  0  0  0  0  0  0  0  0
   14.4592    3.2704    0.0000 H   0  0  0  0  0  0  0  0  0  0  0  0
   14.7612    4.3974    0.0000 H   0  0  0  0  0  0  0  0  0  0  0  0
   13.6342    4.6993    0.0000 H   0  0  0  0  0  0  0  0  0  0  0  0
  1  2  1  0  0  0  0
  2  3  1  0  0  0  0
  3  4  1  0  0  0  0
  4  5  1  0  0  0  0
  5  6  1  0  0  0  0
  6  7  1  0  0  0  0
  7  8  1  0  0  0  0
  8  9  1  0  0  0  0
  9 10  1  0  0  0  0
 10 11  1  0  0  0  0
 11 12  1  0  0  0  0
 12 13  2  0  0  0  0
 12 14  1  0  0  0  0
 14 15  1  0  0  0  0
  1 16  1  0  0  0  0
  1 17  1  0  0  0  0
  1 18  1  0  0  0  0
  2 19  1  0  0  0  0
  2 20  1  0  0  0  0
  3 21  1  0  0  0  0
  3 22  1  0  0  0  0
  4 23  1  0  0  0  0
  4 24  1  0  0  0  0
  5 25  1  0  0  0  0
  5 26  1  0  0  0  0
  6 27  1  0  0  0  0
  6 28  1  0  0  0  0
  7 29  1  0  0  0  0
  7 30  1  0  0  0  0
  8 31  1  0  0  0  0
  8 32  1  0  0  0  0
  9 33  1  0  0  0  0
  9 34  1  0  0  0  0
 10 35  1  0  0  0  0
 10 36  1  0  0  0  0
 11 37  1  0  0  0  0
 11 38  1  0  0  0  0
 15 39  1  0  0  0  0
 15 40  1  0  0  0  0
 15 41  1  0  0  0  0
M  END
$$$$
118
  Mrv0541 12152312282D          

 29 28  0  0  0  0            999 V2000
    2.9980    2.5559    0.0000 C   0  0  0  0  0  0  0  0  0  0  0  0
    3.7125    2.1434    0.0000 C   0  0  0  0  0  0  0  0  0  0  0  0
    4.4270    2.5559    0.0000 C   0  0  0  0  0  0  0  0  0  0  0  0
    5.1414    2.1434    0.0000 C   0  0  0  0  0  0  0  0  0  0  0  0
    5.8559    2.5559    0.0000 C   0  0  0  0  0  0  0  0  0  0  0  0
    6.5704    2.1434    0.0000 C   0  0  0  0  0  0  0  0  0  0  0  0
    7.2849    2.5559    0.0000 C   0  0  0  0  0  0  0  0  0  0  0  0
    7.9993    2.1434    0.0000 C   0  0  0  0  0  0  0  0  0  0  0  0
    8.7138    2.5559    0.0000 C   0  0  0  0  0  0  0  0  0  0  0  0
    3.4105    3.2704    0.0000 H   0  0  0  0  0  0  0  0  0  0  0  0
    2.2836    2.9684    0.0000 H   0  0  0  0  0  0  0  0  0  0  0  0
    2.5855    1.8414    0.0000 H   0  0  0  0  0  0  0  0  0  0  0  0
    3.3252    1.4150    0.0000 H   0  0  0  0  0  0  0  0  0  0  0  0
    4.0998    1.4150    0.0000 H   0  0  0  0  0  0  0  0  0  0  0  0
    4.0397    3.2843    0.0000 H   0  0  0  0  0  0  0  0  0  0  0  0
    4.8143    3.2843    0.0000 H   0  0  0  0  0  0  0  0  0  0  0  0
    4.7541    1.4150    0.0000 H   0  0  0  0  0  0  0  0  0  0  0  0
    5.5288    1.4150    0.0000 H   0  0  0  0  0  0  0  0  0  0  0  0
    5.4686    3.2843    0.0000 H   0  0  0  0  0  0  0  0  0  0  0  0
    6.2432    3.2843    0.0000 H   0  0  0  0  0  0  0  0  0  0  0  0
    6.1831    1.4150    0.0000 H   0  0  0  0  0  0  0  0  0  0  0  0
    6.9577    1.4150    0.0000 H   0  0  0  0  0  0  0  0  0  0  0  0
    6.8975    3.2843    0.0000 H   0  0  0  0  0  0  0  0  0  0  0  0
    7.6722    3.2843    0.0000 H   0  0  0  0  0  0  0  0  0  0  0  0
    7.6120    1.4150    0.0000 H   0  0  0  0  0  0  0  0  0  0  0  0
    8.3866    1.4150    0.0000 H   0  0  0  0  0  0  0  0  0  0  0  0
    9.1263    1.8414    0.0000 H   0  0  0  0  0  0  0  0  0  0  0  0
    9.4283    2.9684    0.0000 H   0  0  0  0  0  0  0  0  0  0  0  0
    8.3013    3.2704    0.0000 H   0  0  0  0  0  0  0  0  0  0  0  0
  1  2  1  0  0  0  0
  2  3  1  0  0  0  0
  3  4  1  0  0  0  0
  4  5  1  0  0  0  0
  5  6  1  0  0  0  0
  6  7  1  0  0  0  0
  7  8  1  0  0  0  0
  8  9  1  0  0  0  0
  1 10  1  0  0  0  0
  1 11  1  0  0  0  0
  1 12  1  0  0  0  0
  2 13  1  0  0  0  0
  2 14  1  0  0  0  0
  3 15  1  0  0  0  0
  3 16  1  0  0  0  0
  4 17  1  0  0  0  0
  4 18  1  0  0  0  0
  5 19  1  0  0  0  0
  5 20  1  0  0  0  0
  6 21  1  0  0  0  0
  6 22  1  0  0  0  0
  7 23  1  0  0  0  0
  7 24  1  0  0  0  0
  8 25  1  0  0  0  0
  8 26  1  0  0  0  0
  9 27  1  0  0  0  0
  9 28  1  0  0  0  0
  9 29  1  0  0  0  0
M  END
$$$$
119
  Mrv0541 12152312282D          

 23 22  0  0  0  0            999 V2000
    2.9980    2.5559    0.0000 C   0  0  0  0  0  0  0  0  0  0  0  0
    3.7125    2.1434    0.0000 O   0  0  0  0  0  0  0  0  0  0  0  0
    4.4270    2.5559    0.0000 C   0  0  0  0  0  0  0  0  0  0  0  0
    4.4270    3.3809    0.0000 O   0  0  0  0  0  0  0  0  0  0  0  0
    5.1414    2.1434    0.0000 C   0  0  0  0  0  0  0  0  0  0  0  0
    5.8559    2.5559    0.0000 C   0  0  0  0  0  0  0  0  0  0  0  0
    6.5704    2.1434    0.0000 C   0  0  0  0  0  0  0  0  0  0  0  0
    7.2849    2.5559    0.0000 C   0  0  0  0  0  0  0  0  0  0  0  0
    7.2849    3.3809    0.0000 O   0  0  0  0  0  0  0  0  0  0  0  0
    7.9993    2.1434    0.0000 O   0  0  0  0  0  0  0  0  0  0  0  0
    8.7138    2.5559    0.0000 C   0  0  0  0  0  0  0  0  0  0  0  0
    3.4105    3.2704    0.0000 H   0  0  0  0  0  0  0  0  0  0  0  0
    2.2836    2.9684    0.0000 H   0  0  0  0  0  0  0  0  0  0  0  0
    2.5855    1.8414    0.0000 H   0  0  0  0  0  0  0  0  0  0  0  0
    4.7541    1.4150    0.0000 H   0  0  0  0  0  0  0  0  0  0  0  0
    5.5288    1.4150    0.0000 H   0  0  0  0  0  0  0  0  0  0  0  0
    5.4686    3.2843    0.0000 H   0  0  0  0  0  0  0  0  0  0  0  0
    6.2432    3.2843    0.0000 H   0  0  0  0  0  0  0  0  0  0  0  0
    6.1831    1.4150    0.0000 H   0  0  0  0  0  0  0  0  0  0  0  0
    6.9577    1.4150    0.0000 H   0  0  0  0  0  0  0  0  0  0  0  0
    9.1263    1.8414    0.0000 H   0  0  0  0  0  0  0  0  0  0  0  0
    9.4283    2.9684    0.0000 H   0  0  0  0  0  0  0  0  0  0  0  0
    8.3013    3.2704    0.0000 H   0  0  0  0  0  0  0  0  0  0  0  0
  1  2  1  0  0  0  0
  2  3  1  0  0  0  0
  3  4  2  0  0  0  0
  3  5  1  0  0  0  0
  5  6  1  0  0  0  0
  6  7  1  0  0  0  0
  7  8  1  0  0  0  0
  8  9  2  0  0  0  0
  8 10  1  0  0  0  0
 10 11  1  0  0  0  0
  1 12  1  0  0  0  0
  1 13  1  0  0  0  0
  1 14  1  0  0  0  0
  5 15  1  0  0  0  0
  5 16  1  0  0  0  0
  6 17  1  0  0  0  0
  6 18  1  0  0  0  0
  7 19  1  0  0  0  0
  7 20  1  0  0  0  0
 11 21  1  0  0  0  0
 11 22  1  0  0  0  0
 11 23  1  0  0  0  0
M  END
$$$$
120
  Mrv0541 12152312282D          

 25 26  0  0  0  0            999 V2000
    2.0367   -1.2991    0.0000 C   0  0  0  0  0  0  0  0  0  0  0  0
    2.7041   -1.7840    0.0000 C   0  0  0  0  0  0  0  0  0  0  0  0
    2.4492   -2.5687    0.0000 S   0  0  0  0  0  0  0  0  0  0  0  0
    1.6242   -2.5687    0.0000 C   0  0  0  0  0  0  0  0  0  0  0  0
    1.1393   -3.2361    0.0000 N   0  0  0  0  0  0  0  0  0  0  0  0
    1.4748   -3.9898    0.0000 C   0  0  0  0  0  0  0  0  0  0  0  0
    1.8104   -4.7434    0.0000 N   0  0  0  0  0  0  0  0  0  0  0  0
    1.3693   -1.7840    0.0000 N   0  0  0  0  0  0  0  0  0  0  0  0
    0.5846   -1.5291    0.0000 C   0  0  0  0  0  0  0  0  0  0  0  0
    0.4131   -0.7221    0.0000 C   0  0  0  0  0  0  0  0  0  0  0  0
   -0.3715   -0.4672    0.0000 C   0  0  0  0  0  0  0  0  0  0  0  0
   -0.5430    0.3398    0.0000 N   0  0  0  0  0  0  0  0  0  0  0  0
    0.0701    0.8918    0.0000 C   0  0  0  0  0  0  0  0  0  0  0  0
    0.8547    0.6369    0.0000 C   0  0  0  0  0  0  0  0  0  0  0  0
    1.0262   -0.1701    0.0000 C   0  0  0  0  0  0  0  0  0  0  0  0
   -0.1015    1.6988    0.0000 Cl  0  0  0  0  0  0  0  0  0  0  0  0
    2.4417   -0.5804    0.0000 H   0  0  0  0  0  0  0  0  0  0  0  0
    1.4103   -0.7622    0.0000 H   0  0  0  0  0  0  0  0  0  0  0  0
    3.2626   -1.1767    0.0000 H   0  0  0  0  0  0  0  0  0  0  0  0
    3.5129   -1.9471    0.0000 H   0  0  0  0  0  0  0  0  0  0  0  0
    0.3025   -2.3043    0.0000 H   0  0  0  0  0  0  0  0  0  0  0  0
   -0.2158   -1.7287    0.0000 H   0  0  0  0  0  0  0  0  0  0  0  0
   -0.9846   -1.0192    0.0000 H   0  0  0  0  0  0  0  0  0  0  0  0
    1.4678    1.1889    0.0000 H   0  0  0  0  0  0  0  0  0  0  0  0
    1.6763   -0.6780    0.0000 H   0  0  0  0  0  0  0  0  0  0  0  0
  1  2  1  0  0  0  0
  2  3  1  0  0  0  0
  3  4  1  0  0  0  0
  4  5  2  0  0  0  0
  5  6  1  4  0  0  0
  6  7  3  0  0  0  0
  4  8  1  0  0  0  0
  1  8  1  0  0  0  0
  8  9  1  0  0  0  0
  9 10  1  0  0  0  0
 10 11  4  0  0  0  0
 11 12  4  0  0  0  0
 12 13  4  0  0  0  0
 13 14  4  0  0  0  0
 14 15  4  0  0  0  0
 10 15  4  0  0  0  0
 13 16  1  0  0  0  0
  1 17  1  0  0  0  0
  1 18  1  0  0  0  0
  2 19  1  0  0  0  0
  2 20  1  0  0  0  0
  9 21  1  0  0  0  0
  9 22  1  0  0  0  0
 11 23  1  0  0  0  0
 14 24  1  0  0  0  0
 15 25  1  0  0  0  0
M  END
$$$$
121
  Mrv0541 12152312282D          

 50 49  0  0  0  0            999 V2000
   -5.1348    0.1260    0.0000 C   0  0  0  0  0  0  0  0  0  0  0  0
   -4.4203   -0.2865    0.0000 C   0  0  0  0  0  0  0  0  0  0  0  0
   -3.7058    0.1260    0.0000 C   0  0  0  0  0  0  0  0  0  0  0  0
   -2.9913   -0.2865    0.0000 C   0  0  0  0  0  0  0  0  0  0  0  0
   -2.2769    0.1260    0.0000 C   0  0  0  0  0  0  0  0  0  0  0  0
   -1.5624   -0.2865    0.0000 C   0  0  0  0  0  0  0  0  0  0  0  0
   -0.8479    0.1260    0.0000 C   0  0  0  0  0  0  0  0  0  0  0  0
   -0.1335   -0.2865    0.0000 C   0  0  0  0  0  0  0  0  0  0  0  0
    0.5810    0.1260    0.0000 C   0  0  0  0  0  0  0  0  0  0  0  0
    1.2955   -0.2865    0.0000 C   0  0  0  0  0  0  0  0  0  0  0  0
    2.0100    0.1260    0.0000 C   0  0  0  0  0  0  0  0  0  0  0  0
    2.7244   -0.2865    0.0000 C   0  0  0  0  0  0  0  0  0  0  0  0
    3.4389    0.1260    0.0000 N   0  3  0  0  0  0  0  0  0  0  0  0
    4.1534    0.5385    0.0000 C   0  0  0  0  0  0  0  0  0  0  0  0
    3.8514   -0.5885    0.0000 C   0  0  0  0  0  0  0  0  0  0  0  0
    3.0264    0.8404    0.0000 C   0  0  0  0  0  0  0  0  0  0  0  0
   -4.7223    0.8404    0.0000 H   0  0  0  0  0  0  0  0  0  0  0  0
   -5.8492    0.5385    0.0000 H   0  0  0  0  0  0  0  0  0  0  0  0
   -5.5473   -0.5885    0.0000 H   0  0  0  0  0  0  0  0  0  0  0  0
   -4.8076   -1.0150    0.0000 H   0  0  0  0  0  0  0  0  0  0  0  0
   -4.0330   -1.0150    0.0000 H   0  0  0  0  0  0  0  0  0  0  0  0
   -4.0931    0.8544    0.0000 H   0  0  0  0  0  0  0  0  0  0  0  0
   -3.3185    0.8544    0.0000 H   0  0  0  0  0  0  0  0  0  0  0  0
   -3.3787   -1.0150    0.0000 H   0  0  0  0  0  0  0  0  0  0  0  0
   -2.6040   -1.0150    0.0000 H   0  0  0  0  0  0  0  0  0  0  0  0
   -2.6642    0.8544    0.0000 H   0  0  0  0  0  0  0  0  0  0  0  0
   -1.8896    0.8544    0.0000 H   0  0  0  0  0  0  0  0  0  0  0  0
   -1.9497   -1.0150    0.0000 H   0  0  0  0  0  0  0  0  0  0  0  0
   -1.1751   -1.0150    0.0000 H   0  0  0  0  0  0  0  0  0  0  0  0
   -1.2352    0.8544    0.0000 H   0  0  0  0  0  0  0  0  0  0  0  0
   -0.4606    0.8544    0.0000 H   0  0  0  0  0  0  0  0  0  0  0  0
   -0.5208   -1.0150    0.0000 H   0  0  0  0  0  0  0  0  0  0  0  0
    0.2539   -1.0150    0.0000 H   0  0  0  0  0  0  0  0  0  0  0  0
    0.1937    0.8544    0.0000 H   0  0  0  0  0  0  0  0  0  0  0  0
    0.9683    0.8544    0.0000 H   0  0  0  0  0  0  0  0  0  0  0  0
    0.9082   -1.0150    0.0000 H   0  0  0  0  0  0  0  0  0  0  0  0
    1.6828   -1.0150    0.0000 H   0  0  0  0  0  0  0  0  0  0  0  0
    1.6226    0.8544    0.0000 H   0  0  0  0  0  0  0  0  0  0  0  0
    2.3973    0.8544    0.0000 H   0  0  0  0  0  0  0  0  0  0  0  0
    2.3371   -1.0150    0.0000 H   0  0  0  0  0  0  0  0  0  0  0  0
    3.3375   -0.8386    0.0000 H   0  0  0  0  0  0  0  0  0  0  0  0
    4.7854    0.0082    0.0000 H   0  0  0  0  0  0  0  0  0  0  0  0
    4.8678    0.9510    0.0000 H   0  0  0  0  0  0  0  0  0  0  0  0
    3.5214    1.0688    0.0000 H   0  0  0  0  0  0  0  0  0  0  0  0
    3.3211   -1.2205    0.0000 H   0  0  0  0  0  0  0  0  0  0  0  0
    4.2639   -1.3030    0.0000 H   0  0  0  0  0  0  0  0  0  0  0  0
    4.3817    0.0435    0.0000 H   0  0  0  0  0  0  0  0  0  0  0  0
    3.5567    1.4724    0.0000 H   0  0  0  0  0  0  0  0  0  0  0  0
    2.6139    1.5549    0.0000 H   0  0  0  0  0  0  0  0  0  0  0  0
    2.3119    0.4279    0.0000 H   0  0  0  0  0  0  0  0  0  0  0  0
  1  2  1  0  0  0  0
  2  3  1  0  0  0  0
  3  4  1  0  0  0  0
  4  5  1  0  0  0  0
  5  6  1  0  0  0  0
  6  7  1  0  0  0  0
  7  8  1  0  0  0  0
  8  9  1  0  0  0  0
  9 10  1  0  0  0  0
 10 11  1  0  0  0  0
 11 12  1  0  0  0  0
 12 13  1  0  0  0  0
 13 14  1  0  0  0  0
 13 15  1  0  0  0  0
 13 16  1  0  0  0  0
  1 17  1  0  0  0  0
  1 18  1  0  0  0  0
  1 19  1  0  0  0  0
  2 20  1  0  0  0  0
  2 21  1  0  0  0  0
  3 22  1  0  0  0  0
  3 23  1  0  0  0  0
  4 24  1  0  0  0  0
  4 25  1  0  0  0  0
  5 26  1  0  0  0  0
  5 27  1  0  0  0  0
  6 28  1  0  0  0  0
  6 29  1  0  0  0  0
  7 30  1  0  0  0  0
  7 31  1  0  0  0  0
  8 32  1  0  0  0  0
  8 33  1  0  0  0  0
  9 34  1  0  0  0  0
  9 35  1  0  0  0  0
 10 36  1  0  0  0  0
 10 37  1  0  0  0  0
 11 38  1  0  0  0  0
 11 39  1  0  0  0  0
 12 40  1  0  0  0  0
 12 41  1  0  0  0  0
 14 42  1  0  0  0  0
 14 43  1  0  0  0  0
 14 44  1  0  0  0  0
 15 45  1  0  0  0  0
 15 46  1  0  0  0  0
 15 47  1  0  0  0  0
 16 48  1  0  0  0  0
 16 49  1  0  0  0  0
 16 50  1  0  0  0  0
M  CHG  1  13   1
M  END
$$$$
122
  Mrv0541 12152312282D          

 46 45  0  0  0  0            999 V2000
    4.7586    3.5724    0.0000 C   0  0  0  0  0  0  0  0  0  0  0  0
    5.4730    3.9849    0.0000 C   0  0  0  0  0  0  0  0  0  0  0  0
    6.1875    3.5724    0.0000 C   0  0  0  0  0  0  0  0  0  0  0  0
    6.9020    3.9849    0.0000 C   0  0  0  0  0  0  0  0  0  0  0  0
    7.6164    3.5724    0.0000 C   0  0  0  0  0  0  0  0  0  0  0  0
    8.3309    3.9849    0.0000 C   0  0  0  0  0  0  0  0  0  0  0  0
    9.0454    3.5724    0.0000 C   0  0  0  0  0  0  0  0  0  0  0  0
    9.7599    3.9849    0.0000 C   0  0  0  0  0  0  0  0  0  0  0  0
   10.4743    3.5724    0.0000 C   0  0  0  0  0  0  0  0  0  0  0  0
   11.1888    3.9849    0.0000 C   0  0  0  0  0  0  0  0  0  0  0  0
   11.9033    3.5724    0.0000 C   0  0  0  0  0  0  0  0  0  0  0  0
   12.6177    3.9849    0.0000 C   0  0  0  0  0  0  0  0  0  0  0  0
   13.3322    3.5724    0.0000 N   0  0  0  0  0  0  0  0  0  0  0  0
   14.0467    3.9849    0.0000 C   0  0  0  0  0  0  0  0  0  0  0  0
   13.3322    2.7474    0.0000 C   0  0  0  0  0  0  0  0  0  0  0  0
    4.3461    4.2868    0.0000 H   0  0  0  0  0  0  0  0  0  0  0  0
    4.0441    3.1599    0.0000 H   0  0  0  0  0  0  0  0  0  0  0  0
    5.1711    2.8579    0.0000 H   0  0  0  0  0  0  0  0  0  0  0  0
    5.0857    4.7133    0.0000 H   0  0  0  0  0  0  0  0  0  0  0  0
    5.8603    4.7133    0.0000 H   0  0  0  0  0  0  0  0  0  0  0  0
    5.8002    2.8439    0.0000 H   0  0  0  0  0  0  0  0  0  0  0  0
[truncated: 4,039,919 more chars]
