# Supplementary material for: Insights into pharmacokinetic properties for exposure chemicals: predictive modelling of human plasma fraction unbound (fu) and hepatocyte intrinsic clearance (Clint) data using machine learning
Source: Royal Society of Chemistry journal article supplement (doi:10.1039/d4dd00082j), 2024-01-01
Supplement: d4dd00082j4.xlsx [file d4dd00082j4.xlsx]

## Sheet: Sheet1
Compound ID	SMILEs	Response (Clint)
1	NC1C(Cl)=C(N=C(Cl)C=1Cl)C(O)=O	0
2	CC(C1=CC=C(C=C1)O)C2=CC=C(C=C2)O	119			*Yellow highlighted Compounds indicates test set
3	C1=CC=C2C(=C1)C(=O)OC23C4=C(C=C(C=C4)O)OC5=C3C=CC(=C5)O	0
4	C1C=CCC2C1C(=O)N(C2=O)SC(C(Cl)Cl)(Cl)Cl	0
5	C1=CC=C(C(=C1)CC2=CC=CC=C2O)O	83.5
6	C1=CC=C(C=C1)C(=O)NC2=CC3=CC(=C(C(=C3C=C2)O)N=NC4=CC=C(C=C4)N=NC5=CC=C(C=C5)S(=O)(=O)[O-])S(=O)(=O)[O-].[Na+].[Na+]	1.492
7	C1CC(=O)N(C1)CCO	0.1559
8	CC(C)N(CCC(C1=CC=CC=C1)(C2=CC=CC=N2)C(=O)N)C(C)C	0.456
9	CCCCCCC(CCCC)CO	0.658
10	CC(C)NC[C@@H](COC1=CC=CC2=CC=CC=C21)O	7.399
11	CCC1=C(C(=O)C=CO1)O	81
12	C1=CC(=C(C=C1OC2=C(C=C(C=C2I)C[C@@H](C(=O)O)N)I)I)O	0
13	C1=CC(=CC=C1[N+](=O)[O-])Cl	400
14	C1=CC(=CC=C1N)[N+](=O)[O-]	23.6
15	C1=CC(=CC=C1[N+](=O)[O-])O	14
16	CCC1=CC=CC=C1	10.12
17	C=CC1=CC=CC=C1	42.99
18	C1CC1C2=CC=C(C3=CC=CC=C23)N4C(=NN=C4Br)SCC(=O)NC5=C(C=C(C=C5)C(=O)O)Cl	2.221
19	C1=CC(=CN=C1)C#N	0
20	CCNC1=NC(=NC(=N1)N)Cl	0
21	CN1C(=C(C(=N1)Cl)C(=O)OC)S(=O)(=O)NC(=O)NC2=NC(=CC(=N2)OC)OC	0
22	CC(C)(C1=CC=CC=C1)C2=CC=C(C=C2)NC3=CC=C(C=C3)C(C)(C)C4=CC=CC=C4	0
23	C1N2CN3CN1CN(C2)C3	0
24	C[C@H]1COC2=C3N1C=C(C(=O)C3=CC(=C2N4CCN(CC4)C)F)C(=O)O	3
25	C1=CC=C(C(=C1)NC2=NC(=NC(=N2)Cl)Cl)Cl	22.5
26	CC(C(=O)O)OC1=CC(=CC=C1)Cl	0
27	C1=CC=C(C=C1)OC2=C3C=CC=CN3C(=O)C(=C2)C(=O)NC4=NNN=N4	0
28	CC(C)OC(=O)NC1=CC(=CC=C1)Cl	78.1
29	C=CCOC1=NC(=NC(=N1)OCC=C)OCC=C	9.27
30	CN(C)C(=O)NC1=CC=CC=C1	2.89
31	C1=CC=C(C=C1)NC2=CC=C(C=C2)N	15.59
32	CN(C)C1=CC=C(C=C1)CC2=CC=C(C=C2)N(C)C	18.85
33	C[C@]12C=CC3=C4CCC(=O)C=C4CC[C@H]3[C@@H]1CC[C@@H]2O	37.4
34	C1=CC(=CC=C1CC2=CC=C(C=C2)N)N	3.37
35	C1=CC(=CC=C1N)OC2=CC=C(C=C2)N	0
36	CCCCCC/C(=C\C1=CC=CC=C1)/C=O	14.36
37	C1CN(CCC1=CC2=CC(=CC=C2)OC3=NC=C(C=C3)C(F)(F)F)C(=O)NC4=NN=CC=C4	2.7
38	C1=CC=C(C=C1)NC(=NC2=CC=CC=C2)N	0
39	C1=CC=C(C=C1)CCOC(=O)CC2=CC=CC=C2	57.48
40	CCNC1=CC=CC(=C1)C	13.12
41	COC1=C(C=C(C=C1)Cl)C(=O)NCCC2=CC=C(C=C2)S(=O)(=O)NC(=O)NC3CCCCC3	6.62
42	[C@@H]12[C@@H]([C@H]([C@@H]3[C@H]1O3)Cl)[C@]4(C(=C([C@@]2(C4(Cl)Cl)Cl)Cl)Cl)Cl	0
43	CC(CN(CCN(CC(C)O)CC(C)O)CC(C)O)O	0
44	CNCCCC12CCC(C3=CC=CC=C31)C4=CC=CC=C24	0.723
45	COP(=O)(N)SC	0
46	CC(=O)OCC(COC(=O)C)OC(=O)C	393
47	CCCCN(CCO)CCO	1.119
48	CCCCC(CC)COC(=O)CCCCC(=O)OCC(CC)CCCC	13.56
49	CCCCC(CC)COC(=O)CCCCCCCC(=O)OCC(CC)CCCC	3.152
50	C1=CC=C(C=C1)N=NC2=CC=CC=C2	73.7
51	C#CCN1C(=O)COC2=CC(=C(C=C21)N3C(=O)C4=C(C3=O)CCCC4)F	8.336
52	CCCCCCCCOC(=O)C1=CC(=C(C(=C1)O)O)O	230
53	CNS(=O)(=O)CC1=CC2=C(C=C1)NC=C2CCN(C)C	2.414
54	CCNC1=CC=CC=C1	21.8
55	C[C@H]1C[C@@H]2[C@H]([C@H]([C@]3(O2)CC[C@H]4[C@@H]5CC[C@@H]6C[C@@H](CC[C@@]6([C@H]5CC4=C(C3)C)C)NS(=O)(=O)C)C)NC1	3.327
56	C1CNCCN(C1)S(=O)(=O)C2=CC=CC3=C2C=CN=C3	3.873
57	CC(=O)NC1=CC=C(C=C1)O	0.3598
58	CC1=CC(=C(N=C1)C2=NC(C(=O)N2)(C)C(C)C)C(=O)O	0
59	CCCCC1=CC=C(C=C1)N	26.4
60	CS(=O)(=O)C1=CC(=C(C=C1)C(=O)C2C(=O)CCCC2=O)[N+](=O)[O-]	0.3542
61	CC(=CC1C(C1(C)C)C(=O)OCC2=COC(=C2)CC3=CC=CC=C3)C	98.96
62	C1=CC=C(C=C1)OCCOC2=CC=CC=C2	18.51
63	CCCCCCCC1CCC(=O)O1	9.47
64	CN1C(=C(C=N1)Cl)C2=C(SC(=C2)C(=O)N[C@@H](CC3=CC(=CC=C3)F)CN)Cl	7.08
65	C[C@@H]1C[C@@H]([C@@H]2[C@H](C[C@H]([C@@](O2)(C(=O)C(=O)N3CCCC[C@H]3C(=O)O[C@@H]([C@@H]([C@H](CC(=O)[C@@H](/C=C(/C1)\C)CC=C)O)C)/C(=C/[C@@H]4CC[C@H]([C@@H](C4)OC)O)/C)O)C)OC)OC	0
66	CC[C@@H]1/C=C(/C[C@@H](C[C@@H]([C@@H]2[C@H](C[C@H]([C@@](O2)(C(=O)C(=O)N3CCCC[C@H]3C(=O)O[C@@H]([C@@H]([C@H](CC1=O)O)C)/C(=C/[C@@H]4CC[C@H]([C@@H](C4)OC)O)/C)O)C)OC)OC)C)\C	118.1
67	COC1=CC=C(C=C1)CO	90.03
68	C[C@H]1CO[C@H]2N1C(=O)C3=C(C(=O)C(=CN3C2)C(=O)NCC4=C(C=C(C=C4)F)F)O	6.294
69	CC/C(=C(\C1=CC=CC=C1)/C2=CC=C(C=C2)OCCN(C)C)/C3=CC=CC=C3	0
70	C[C@H](C(=O)OCC#C)OC1=CC=C(C=C1)OC2=C(C=C(C=N2)Cl)F	1010
71	C1CCC(=O)NCC1	0
72	CC(C)(C)C1=NN(C(=C1)NC(=O)NCC2=CC=CC=C2SC3=CN4C(=NN=C4C5=CC=CC=C5SCCO)C=C3)C6=CC(=C(C=C6)O)Cl	25.12
73	CC(C)C1=C(C(=CC=C1)C(C)C)N2C(=O)C3=C(C2=O)C=C(C=C3)O	47
74	CC(=CCC/C(=C/COC(=O)C)/C)C	823
75	CCCCOC(=O)CCCCC(=O)OCCCC	14.03
76	COC(=O)NC1=NC2=CC=CC=C2N1	24
77	CC(=CCC/C(=C\CO)/C)C	1.57
78	CC1=C(C(=O)N2CCCCC2=N1)CCN3CCC(CC3)C4=NOC5=C4C=CC(=C5)F	10.9
79	CC1=CC=C(C=C1)O	39.66
80	C1=CC(=CC=C1Cl)Cl	130
81	C1=CC(=CC=C1N)Cl	0
82	COC(=O)CCC(=O)OC	364.4
83	C1CC2C(O2)CC1C3CO3	136
84	C=CC=C	23.89
85	C(CCl)Cl	21.34
86	C=CC#N	32.11
87	C(CCC(=O)NN)CC(=O)NN	0.6018
88	C1C(OC2=CC=CC=C2O1)C(=O)NC3=CC=C(C=C3)C4=CNN=C4	14.19
89	CN(C)CCOC1=C(C=CC(=C1)C2=CNN=C2)NC(=O)C3COC4=CC=CC=C4O3	8.105
90	CC(C)(C)C(CCC1=CC=C(C=C1)Cl)(CN2C=NC=N2)O	5.278
91	CC1=CC(=CC=C1)N	32.9
92	C1=CC(=CC(=C1)N)N	0
93	C1=CC(=CC(=C1)O)O	14.48
94	CC1=CC=CC=C1	17.66
95	C1=CC=C(C=C1)Cl	879.1
96	C1=CC=C(C=C1)O	5.496
97	CCCCOC(=O)CCCCCCCCC(=O)OCCCC	134
98	CN1[C@@H]2CCC[C@H]1CC(C2)NC(=O)C3=NN(C4=CC=CC=C43)C	7.009
99	C1CCOC1	9879
100	C1=COC=C1	2.104
101	CC#CC1=NC(=NC(=C1)C)NC2=CC=CC=C2	12.42
102	CCCCCCCC/C=C\CCCCCCCC(=O)N(C)CC(=O)O	41.7
103	C=CC(=O)NCNC(=O)C=C	2.954
104	COC1=C(C=C(C=C1)/C(=C/C(=O)N2CCOCC2)/C3=CC=C(C=C3)Cl)OC	20.3
105	CCCCCC	5.557
106	[2H]C([2H])([2H])N(C[C@H]1CCCC[C@@]1(C2=CC(=CC=C2)OC)O)C([2H])([2H])[2H]	1.627
107	COC1=C(C=C2C(=C1)N=CN=C2NC3=CC(=C(C=C3)F)Cl)NC(=O)/C=C/CN4CCCCC4	3
108	CCCCCCCC(=O)OC	817
109	CC(=O)OCCOCCOCCOC(=O)C	206
110	C(CNCCN)N	2.003
111	CC(C1=CC2=CC=CC=C2S1)N(C(=O)N)O	2.298
112	CCCCN(CC)C(=O)SCCC	159
113	CC1=CC=C(C=C1)C2=CC(=NN2C3=CC=C(C=C3)S(=O)(=O)N)C4=CC=CC=C4	13.49
114	CCCCCCCC	3.5
115	CCCCOCCO	4.299
116	CC1=NN(C(=C1/C=N/OCC2=CC=C(C=C2)C(=O)OC(C)(C)C)OC3=CC=CC=C3)C	16.8
117	CCCCCCCCCCCC(=O)OC	445.2
118	CCCCCCCCC	3.936
119	COC(=O)CCCC(=O)OC	46.3
120	C1CSC(=NC#N)N1CC2=CN=C(C=C2)Cl	2.574
121	CCCCCCCCCCCC[N+](C)(C)C.[Cl-]	16.2
122	CCCCCCCCCCCCN(C)C	34.2
123	C1=CC(=C(C=C1Cl)Cl)C(CN2C=NC=N2)COC(C(F)F)(F)F	0
124	CCC1=CC=C(C=C1)C(=O)NN(C(=O)C2=CC(=CC(=C2)C)C)C(C)(C)C	22.4
125	COCCOCCOCCOC	0
126	CCOCCOCCOCCO	0
127	CCC1=CN=C(C=C1)CCOC2=CC=C(C=C2)CC3C(=O)NC(=O)S3.Cl	8.92
128	C1CC1(C(=O)NC2=C(C=C(C=C2)Cl)Cl)C(=O)O	0.3364
129	C1CN(CC2=CC=CC=C21)C(=N)N	3.98
130	CCN(C1CCCCC1)C(=O)SCC	34.48
131	COC(=O)C(C1CCCCN1)C2=CC=CC=C2	2.51
132	CCCCC(CC)CN1C(=O)C2C3CC(C2C1=O)C=C3	134.3
133	CN(C)CC/C=C\1/C2=CC=CC=C2SC3=C1C=C(C=C3)Cl	14
134	CCOC(=O)[C@H](C)OC1=CC=C(C=C1)OC2=NC3=C(O2)C=C(C=C3)Cl	723
135	CC[C@@H]1[C@@]([C@@H]([C@H](C(=O)[C@@H](C[C@@]([C@@H]([C@H]([C@@H]([C@H](C(=O)O1)C)O[C@H]2C[C@@]([C@H]([C@@H](O2)C)O)(C)OC)C)O[C@H]3[C@@H]([C@H](C[C@H](O3)C)N(C)C)O)(C)O)C)C)O)(C)O	4.04
136	CC(C)OC1=CC=CC=C1OC(=O)NC	6.899
137	CC(C)C1(C(=O)NC(=N1)C2=C(C=C(C=N2)COC)C(=O)O)C	0
138	C1=CC=C(C=C1)C(CCC2=CC=C(C=C2)Cl)(CN3C=NC=N3)C#N	21.7
139	C1=CC=C(C=C1)C(=O)C2=C(C(=C(C=C2)O)O)O	94.1
140	CN(CCC1=CC=C(C=C1)NS(=O)(=O)C)CCOC2=CC=C(C=C2)NS(=O)(=O)C	1.9
141	C1C2C(COS(=O)O1)C3(C(=C(C2(C3(Cl)Cl)Cl)Cl)Cl)Cl	4.984
142	C1=CC(=CC=C1C(C2=CC=C(C=C2)Cl)(C(Cl)(Cl)Cl)O)Cl	27.8
143	C1=CC=C2C(=C1)C(OS2(=O)=O)(C3=CC(=C(C(=C3)Br)O)Br)C4=CC(=C(C(=C4)Br)O)Br	0
144	C1=CC(=C(C=C1NC(=O)C2=C(C(=CC(=C2)Cl)Cl)O)Cl)Cl	0
145	CC1=CC=C(C=C1)S(=O)(=O)NC(=O)NN2CCCCCC2	0
146	C1=CC=C(C=C1)OP(=O)(OC2=CC=CC=C2)OC3=CC=CC=C3	26.44
147	C(CCl)OP(=O)(OCCCl)OCCCl	2.04
148	CC(C)(/C=N/OC(=O)NC)SC	0.7456
149	CC1(C(=O)NC(=O)N1CO)C	13.1
150	COC1=C2C3=C(C(=O)CC3)C(=O)OC2=C4[C@@H]5C=CO[C@@H]5OC4=C1	11.28
151	C1CC2=C(C[C@@H]1NS(=O)(=O)C3=CC=C(C=C3)F)C4=CC=CC=C4N2CCC(=O)O	3.81
152	CCCCCCCCCCCCOC(=O)C1=CC(=C(C(=C1)O)O)O	0
153	C1=CC(=C(C(=C1)F)C(=O)NC(=O)NC2=CC(=C(C=C2)OC(C(OC(F)(F)F)F)(F)F)Cl)F	2.873
154	CC(C)(C)NC(=O)C1=CC(=C(C=C1)OC2=C(C=C(C(=C2)F)CC(=O)O)Cl)NS(=O)(=O)C3=C(C=C(C=C3)C4CC4)Cl	6
155	COC(=O)CSC1=C(C=C(C(=C1)N=C2N3CCCCN3C(=O)S2)F)Cl	645
156	C1=CC(=C(C=C1C2=C(C(=O)C3=C(C=C(C=C3O2)O)O)O)O)O	75.2
157	CO/C=C(\C1=CC=CC=C1COC2=CC=CC(=N2)C(F)(F)F)/C(=O)OC	57.1
158	CCN(CC1=C(C=CC(=C1)C(F)(F)F)C2=C(C=CC(=C2)CC(=O)O)OC)C(=O)NCC3=CC=CC=C3	25.12
159	CCOC(=O)C1=CC=CC=C1C(=C2C=C(C(=O)C(=C2)Br)Br)C3=CC(=C(C(=C3)Br)O)Br	0
160	CC(C)CC1=C(C(=NC(=C1C(=O)OC)C(F)F)C(F)(F)F)C2=NCCS2	41.5
161	C1=CC=C2C(=C1)C(=O)C3=C(C2=O)C=C(C=C3)N	30.8
162	CCCCC(CC)COC(=O)C1=CC=CC=C1C(=O)OCC(CC)CCCC	2.646
163	CCCCCCCCOC(=O)C1=CC=CC=C1C(=O)OCCCCCCCC	0
164	CCCN(CC)CC1COC2(O1)CCC(CC2)C(C)(C)C	3.353
165	C1=CC=C(C=C1)COC(=O)C2=CC=CC=C2O	841
166	CCC1=NN(C(=C1Cl)C(=O)NCC2=CC=C(C=C2)C(C)(C)C)C	15.94
167	COC(=O)C1=CC=CC=C1O	817
168	CC1COC(O1)(CN2C=NC=N2)C3=C(C=C(C=C3)OC4=CC=C(C=C4)Cl)Cl	30.6
169	C1=CC(=C(C(=C1)Cl)C#N)Cl	7.036
170	CC1=CC(=C(C(=C1)C(C)(C)C)O)CC2=C(C(=CC(=C2)C)C(C)(C)C)O	22.4
171	CCC(C)OC(=O)N1CCCCC1CCO	12.56
172	C1=CC=C(C=C1)C(=O)C2=CC=CC=C2	9.134
173	COC1=C(C=CC(=C1)C2=CC(=C(C=C2)N)OC)N	18.05
174	CC1=C(C=CC(=C1)C2=CC(=C(C=C2)N)C)N	0
175	C1=C(C=C(C(=C1Cl)N2C(=C(C(=N2)C#N)S(=O)C(F)(F)F)N)Cl)C(F)(F)F	1.367
176	CC1=CC=C(C=C1)C2=C(N=C(N2S(=O)(=O)N(C)C)C#N)Cl	10
177	C1=CC=C2C=C3C=CC=CC3=CC2=C1	13.33
178	C1=CC=C(C=C1)CC2=C(C=CC(=C2)Cl)O	4.53
179	CC(C(=O)O)OC1=C(C=C(C=C1)Cl)Cl	2.23
180	CCOC(=O)C1=CC=C(C=C1)O	57.24
181	C1=CC=C(C=C1)C(=O)OCCOCCOC(=O)C2=CC=CC=C2	843
182	CC1=CC(=C(C=C1)OC)N	19.53
183	C1=CC=C(C(=C1)O)O	42.3
184	CC(C)(C)C1=C(C=CC(=C1)OC)O	7.06
185	CCOC1=CC=C(C=C1)CC2=C(C=CC(=C2)[C@@]34[C@@H]([C@H]([C@@H]([C@@](O3)(CO4)CO)O)O)O)Cl	4.5
186	CC1=C(C=C(C=C1)[N+](=O)[O-])[N+](=O)[O-]	0
187	CN1CCN(CC1)C2=CC(=C(C=C2)NC3=NC=C(C(=N3)OC4=CC=CC(=C4)NC(=O)C=C)Cl)OC	3.31
188	COC1=C(C=CC(=C1)C=O)O	234
189	C1=CC=C(C=C1)CNC2=NC=NC3=C2NC=N3	0
190	CC1=CC(=NC(=N1)NC2=CC=CC=C2)C3CC3	37.77
191	CCOC(=O)CC(C(=O)OCC)SP(=S)(OC)OC	368
192	CCCOC(=O)C1=CC(=C(C(=C1)O)O)O	49.7
193	CC1=C(C=CC(=C1)OP(=S)(OC)OC)[N+](=O)[O-]	10.02
194	CCNC1=NC(=NC(=N1)Cl)NCC	6.326
195	C1=CC=C(C=C1)NC2=CC=C(C=C2)O	75.1
196	C1=CC=C(C=C1)NC2=CC=CC=C2	64.57
197	CC1(CCC(CC1)OC2=C(C=C(C(=C2)OC)CNC(=O)[C@@H]3CCCN3)F)C	3.151
198	C1=CC=C(C=C1)NNC2=CC=CC=C2	19
199	CC1=NN(C(=O)N1C(F)F)C2=C(C=C(C(=C2)NS(=O)(=O)C)Cl)Cl	5.715
200	CCCCOC1=NC(=C2C(=N1)N(CC(=O)N2)CC3=CC=CC(=C3)CN4CCCC4)N	9.301
201	CN(C)CCOC1=CC=C(C=C1)CNC(=O)C2=CC(=C(C=C2)OC)OC	11
202	CCS(=O)(=O)C1=C(N=CC=C1)S(=O)(=O)NC(=O)NC2=NC(=CC(=N2)OC)OC	0
203	C1=CC=C(C=C1)OCCO	17.89
204	COCCOC[C@H](CC1(CCCC1)C(=O)NC2CCC(CC2)C(=O)O)C(=O)OC3=CC4=C(CCC4)C=C3	9.898
205	CC1=NNC(=O)N(C1)/N=C/C2=CN=CC=C2	8.611
206	C1=CC(=O)NNC1=O	0
207	COC1=CC(=NC(=N1)SC2=C(C(=CC=C2)Cl)C(=O)[O-])OC.[Na+]	0
208	C1COCCO1	3.485
209	CCCCCCCC(=O)O	5.626
210	CCCCCCCCCC	0.7741
211	CN([C@H]1CC[C@@]2(CCCO2)C[C@@H]1N3CCCC3)C(=O)CC4=C5C=COC5=CC=C4	3.36
212	C1=CC(=CC=C1OC2=C3C(=CC(=CC3=NC=C2)Cl)Cl)F	0
213	C[C@]12C[C@@H]([C@]3([C@H]([C@@H]1C[C@H]([C@@]2(C(=O)CO)O)O)CCC4=CC(=O)C=C[C@@]43C)F)O	2.492
214	C1=CC=C2C(=C1)C(C(=O)N2)(C3=CC=C(C=C3)O)C4=CC=C(C=C4)O	0
215	CC(C)C1CCC(C1(CN2C=NC=N2)O)CC3=CC=C(C=C3)Cl	101
216	CC1=CC(=C(C=C1O)C)C2(C3=CC=CC=C3S(=O)(=O)O2)C4=C(C=C(C(=C4)C)O)C	0
217	COC1=CC(=NC(=N1)OC2=C(C(=CC=C2)OC3=NC(=CC(=N3)OC)OC)C(=O)[O-])OC.[Na+]	0
218	C/C(=C\C1=CC=C(C=C1)OCCN2CCOCC2)/C3=CC4=C(C=C3)C(CCC4(C)C)(C)C	0
219	CN1CC[C@@]23CCCC[C@@H]2[C@@H]1CC4=C3C=C(C=C4)OC	52.64
220	CCC1(CCC(=O)NC1=O)C2=CC=C(C=C2)N	0.723
221	CC(CCC(=O)O)(C1=CC=C(C=C1)O)C2=CC=C(C=C2)O	0
222	CC1=C2C(=CC(=C1C(=O)O)O)C(=O)C3=C(C2=O)C(=C(C(=C3O)O)[C@H]4[C@@H]([C@H]([C@@H]([C@H](O4)CO)O)O)O)O	88.8
223	CC(=O)OC[C@@H]1[C@H]([C@@H]([C@H]([C@H](O1)O[C@]2([C@H]([C@@H]([C@H](O2)COC(=O)C)OC(=O)C)OC(=O)C)COC(=O)C)OC(=O)C)OC(=O)C)OC(=O)C	194
224	CC1=C(C(=CC=C1)C(=O)OC)S(=O)(=O)NC(=O)NC2=NC(=NC(=N2)OCC(F)(F)F)N(C)C	14.47
225	C(C(CBr)Br)OP(=O)(OCC(CBr)Br)OCC(CBr)Br	177
226	CCCCOP(=O)(OCCCC)OCCCC	0
227	CC1(CCCCC1)C(=O)NC2=C(C(=C(C=C2)O)Cl)Cl	35.27
228	CC1=C(SC2=C1C(=N[C@H](C3=NN=C(N32)C)CC(=O)OC(C)(C)C)C4=CC=C(C=C4)Cl)C	16.6
229	C(=C(Cl)Cl)(Cl)Cl	0.0548
230	C1C[C@H](CN(C1)CCC2=CC3=C(C=C2)OCO3)OC(C4=CC=CC=C4)C5=CC=CC=C5	17.11
231	CC1=CCCC(C1/C=C(\C)/C(=O)C)(C)C	10.8
232	CC(C)(C)NC(=O)[C@@H]1C[C@@H]2CCCC[C@@H]2CN1C[C@H]([C@H](CC3=CC=CC=C3)NC(=O)[C@H](CC(=O)N)NC(=O)C4=NC5=CC=CC=C5C=C4)O	0
233	CC1=NN(C(=N1)C2=CN3CCOC4=C(C3=N2)C=CC(=C4)C5=CN(N=C5)C(C)(C)C(=O)N)C(C)C	1.385
234	CC(C)(C)C1=C(C(=CC=C1)C(C)(C)C)O	0
235	CCOC(=O)C(CC1=CC(=C(C=C1Cl)F)N2C(=O)N(C(=N2)C)C(F)F)Cl	854
236	C1C[C@H](C2=C(C=CC=N2)[C@H]([C@@H]1C3=C(C(=CC=C3)F)F)N)OC(=O)N4CCC(CC4)N5C6=C(NC5=O)N=CC=C6	3.424
237	C1=CC2=C3C(=C1)C=CC4=CC=CC(=C43)C=C2	6.18
238	CC1=C2CCC(C(=O)N2C3=CC=CC=C13)CC4=C(NC=N4)C	2.558
239	CC1=C2CC[C@@H](C(=O)N2C3=CC=CC=C13)CC4=C(NC=N4)C.Cl	7.56
240	C[C@]12CC[C@H]3[C@H]([C@@H]1CC[C@@H]2O)[C@@H](CC4=C3C=CC(=C4)O)CCCCCCCCCS(=O)CCCC(C(F)(F)F)(F)F	2.4
241	CCOC(=O)COC1=C(C=C(C(=C1)C2=NN(C(=C2Cl)OC(F)F)C)F)Cl	71.6
242	CN(C)C1=CC=C(C=C1)C(C2=CC=CC=C2)C3=CC=C(C=C3)N(C)C	0
243	C1=CC2=C(C(=C(C=C2Cl)I)O)N=C1	4.458
244	CCOP(=S)(OCC)SCSC(C)(C)C	32.5
245	CC(C)(C1=CC=C(C=C1)OC2=CC=C(C=C2)N)C3=CC=C(C=C3)OC4=CC=C(C=C4)N	0
246	COC(=O)C1=CC=CC=C1C(=O)OC	22.26
247	CCCOC(=O)C1=CC=CC=C1C(=O)OCCC	858
248	C=CCOC(=O)C1=CC=CC=C1C(=O)OCC=C	8.216
249	CCCCCOC(=O)C1=CC=CC=C1C(=O)OCCCCC	301
250	C1=CC(=C2C(=C1)OC(O2)(F)F)C3=CNC=C3C#N	37.05
251	C1=CC(=C(C=C1O)O)C(=O)C2=C(C=C(C=C2)O)O	19.2
252	C1=CC=C(C=C1)C(=O)C2=C(C=C(C=C2)O)O	39.3
253	COC1=CC(=C(C=C1)C(=O)C2=CC=CC=C2)O	15.7
254	CCCCOC(=O)C1=CC=CC=C1C(=O)O	0.7359
255	CC1(C(=O)N(C(=O)O1)NC2=CC=CC=C2)C3=CC=C(C=C3)OC4=CC=CC=C4	16.4
256	CO/C=C(\C1=CC=CC=C1OC2=NC=NC(=C2)OC3=CC=CC=C3C#N)/C(=O)OC	32.39
257	CCCSP(=O)(OCC)SCCC	20.95
258	CC1(CC/C(=C\C2=CC=C(C=C2)Cl)/C1(CN3C=NC=N3)O)C	6.118
259	CN(C)CCC(C1=CC=C(C=C1)Cl)C2=CC=CC=N2	2.882
260	CC1=CC2=C(S1)NC3=CC=CC=C3N=C2N4CCN(CC4)C	2
261	C1=CC=C2C(=C1)C3=CC=CC=C3O2	8.3
262	C[C@H]1/C=C/C=C(\C(=O)NC2=C(C(=C3C(=C2O)C(=C(C4=C3C(=O)[C@](O4)(O/C=C/[C@@H]([C@H]([C@H]([C@@H]([C@@H]([C@@H]([C@H]1O)C)O)C)OC(=O)C)C)OC)C)C)O)O)/C=N/N5CCN(CC5)C)/C	0
263	CCN(CCC#N)C1=CC=C(C=C1)N=NC2=C(C=C(C=C2Cl)[N+](=O)[O-])Cl	0
264	CC(C)C(=O)NC1=CC(=C(C=C1)[N+](=O)[O-])C(F)(F)F	30.38
265	C1=CC=C(C(=C1)[C@@H]2[C@@](O2)(CN3C=NC=N3)C4=CC=C(C=C4)F)Cl	0
266	C1=C(C=C(C(=C1C(=O)O)Cl)N)Cl	0
267	COC(=O)C1=CC=CC=C1N	246
268	CC1=CC=C(C=C1)C(=O)C2=CC(=C(C(=C2)O)O)[N+](=O)[O-]	22
269	CC(C)C1=C(C(=C(N1CC[C@H](C[C@H](CC(=O)O)O)O)C2=CC=C(C=C2)F)C3=CC=CC=C3)C(=O)NC4=CC=CC=C4	0
270	CCN(CC)C(=O)C1=CC=CC(=C1)C	3.797
271	CC1=CC=C(C=C1)C(=O)C2=CC=CC=C2	118
272	CCOC1=C(C=CC(=C1)CC(=O)N[C@@H](CC(C)C)C2=CC=CC=C2N3CCCCC3)C(=O)O	0
273	CSC(=O)C1=C2C(=CC=C1)N=NS2	863
274	CC(C)NCC(COC1=CC=CC2=C1C=CN2)O	2.531
275	CC(=NC#N)N(C)CC1=CN=C(C=C1)Cl	0
276	CN(C)[C@H]1[C@@H]2C[C@@H]3CC4=C(C=CC(=C4C(=C3C(=O)[C@@]2(C(=C(C1=O)C(=O)N)O)O)O)O)N(C)C.Cl	0
277	CCCOC(=O)C1=CN=C(C=C1)C(=O)OCCC	592
278	CC(C)NCC(COC1=CC=CC=C1CC=C)O	22.98
279	CCCCOC(=O)C1=CC=CC=C1	864
280	C(C(CCl)OP(=O)(OC(CCl)CCl)OC(CCl)CCl)Cl	5.092
281	CCC1=CC(=CC(=C1N)CC)CC2=CC(=C(C(=C2)CC)N)CC	8.2
282	CN(C)C(=S)SSC(=S)N(C)C	816
283	CCN(CC)CC(=O)NC1=C(C=CC=C1C)C	5.062
284	C1CN(/C(=N/[N+](=O)[O-])/N1)CC2=CN=C(C=C2)Cl	2.807
285	CCCCC1=NC2(CCCC2)C(=O)N1CC3=CC=C(C=C3)C4=CC=CC=C4C5=NNN=N5	13.63
286	CC/C(=C\C(=N/O)\C(=O)N)/C(C)[N+](=O)[O-]	21.2
287	COC1=CC=CC(=C1OC)[C@@H](C2CCN(CC2)CCC3=CC=C(C=C3)F)O	5.464
288	CC(C)(C)C1=CC(=CC(=C1O)C(C)(C)C)/C=C\2/C(=O)N=C(S2)N.CS(=O)(=O)O	0
289	CC(C)NC1=NC(=NC(=N1)Cl)NC(C)C	14.6
290	CCCC1=NN(C2=C1N=C(NC2=O)C3=C(C=CC(=C3)S(=O)(=O)N4CCN(CC4)C)OCC)C	9.346
291	CC/C=C/C(=O)O	1.121
292	C1=C(C=C(C(=C1O)O)O)C(=O)OC2=CC(=CC(=C2O)O)C(=O)OC[C@@H]3[C@H]([C@@H]([C@H]([C@@H](O3)OC(=O)C4=CC(=C(C(=C4)OC(=O)C5=CC(=C(C(=C5)O)O)O)O)O)OC(=O)C6=CC(=C(C(=C6)OC(=O)C7=CC(=C(C(=C7)O)O)O)O)O)OC(=O)C8=CC(=C(C(=C8)OC(=O)C9=CC(=C(C(=C9)O)O)O)O)O)OC(=O)C1=CC(=C(C(=C1)OC(=O)C1=CC(=C(C(=C1)O)O)O)O)O	0
293	CC(C)(C)CC(C)(C)C1=CC=C(C=C1)O	26.98
294	CC(C)COC(=O)CCCCC(=O)OCC(C)C	865
295	CS(=O)(=O)C1=C(C=CC(=C1)C(F)(F)F)C(=O)C2=C(ON=C2)C3CC3	20.42
296	C/C(=N\OCC1=CC=CC=C1/C(=N\OC)/C(=O)OC)/C2=CC(=CC=C2)C(F)(F)F	466
297	C/C(=C\C(=O)N(C)C)/OP(=O)(OC)OC	1.887
298	C1=CC=C(C=C1)N.Cl	4.41
299	CC(C)NC1=C2C(=C(C=C1)NC(C)C)C(=O)C3=CC=CC=C3C2=O	0
300	CC(C)(C)C(=O)OCOP(=O)(COCCN1C=NC2=C(N=CN=C21)N)OCOC(=O)C(C)(C)C	6.3
301	CC(C)N(C1=CC=C(C=C1)F)C(=O)COC2=NN=C(S2)C(F)(F)F	29
302	C1=CC=C2C(=C1)C(OS2(=O)=O)(C3=CC=C(C=C3)O)C4=CC=C(C=C4)O	1.1
303	CC1=NC(=NC(=N1)OC)NC(=O)[N-]S(=O)(=O)C2=C(C=CC(=C2)I)C(=O)OC.[Na+]	5.691
304	CC(C)OP(=O)(C)OC(C)C	0
305	CC1=CC(=NC(=N1)NC(=O)NS(=O)(=O)C2=CC=CC=C2C(=O)OC3COC3)C	3.107
306	CCCC1=NC2=C(N1CC3=CC=C(C=C3)C4=CC=CC=C4C(=O)O)C=C(C=C2C)C5=NC6=CC=CC=C6N5C	3.98
307	CC(C)C1=C(C(=C(C(=N1)C(C)C)COC)C2=CC=C(C=C2)F)/C=C/[C@H](C[C@H](CC(=O)O)O)O	6.1
308	CCOC1=NC(=CC2=NC(=NN21)S(=O)(=O)NC3=C(C=CC=C3Cl)Cl)F	3.442
309	C1CC2C(C(C1O2)C(=O)O)C(=O)O	0
310	COC1=C(C=C(C=C1)OC(F)(F)F)CN[C@H]2CCCN[C@H]2C3=CC=CC=C3	6.188
311	CCCC[Sn](CCCC)(CCCC)Cl	782
312	C1=CC(=CC=C1C(=O)C2=C(C=C(C=C2)O)O)O	21.1
313	CN(C)CCOC(C1=CC=CC=C1)C2=CC=CC=C2.Cl	0
314	C1CC1C2=NC3=CC=CC=C3C(=C2/C=C/[C@H](C[C@H](CC(=O)O)O)O)C4=CC=C(C=C4)F	14.5
315	CC(C)(C)C1=CC=C(C=C1)S(=O)(=O)NC2=C(C(=NC(=N2)C3=NC=CC=N3)OCCO)OC4=CC=CC=C4OC	2.336
316	C1=CC(=CC=C1C(C2=CC=C(C=C2)O)(C(F)(F)F)C(F)(F)F)O	125
317	C1=CC2=C(C(=C1)O)N=CC=C2	69.68
318	CCC(C)(C)C(=O)OC1=C(C(=O)OC12CCCCC2)C3=C(C=C(C=C3)Cl)Cl	44.6
319	C1=CC=C2C(=C1)NC(=N2)C3=CSC=N3	0
320	C1=CC=C2C(=C1)NC(=S)S2	37.3
321	CCCCC(CC)C(=O)O	1.715
322	CC(C)OC(=O)NNC1=C(C=CC(=C1)C2=CC=CC=C2)OC	41.15
323	CC/C(=N\OC/C=C/Cl)/C1=C(CC(CC1=O)C2CCOCC2)O	3.349
324	C1=CC(=CC=C1C(=O)O)N	0
325	CC(C)(C)NC(=O)[C@@H]1CN(CCN1C[C@H](C[C@@H](CC2=CC=CC=C2)C(=O)N[C@@H]3[C@@H](CC4=CC=CC=C34)O)O)CC5=CN=CC=C5	10.23
326	C1CN2C(=O)[C@H](N=C(C3=CC=CC1=C32)C4=CC=CC=C4F)NC(=O)C5=CC6=CC=CC=C6N5	3.236
327	CN(C)C(=O)NC1=CC=C(C=C1)Cl	3.086
328	COC1=CC=C(C=C1)O	36
329	C1=CC=C2C(=C1)C(=O)OC23C4=CC(=C(C(=C4OC5=C(C(=C(C=C35)Br)O)Br)Br)O)Br	0
330	CCN(C1=CC=CC(=C1)C2=CC=NC3=C(C=NN23)C#N)C(=O)C	2.843
331	CCC#CC(C)C1(C(=O)NC(=O)N(C1=O)C)CC=C	0
332	CCN(CC)C(=O)C(C)OC1=CC=CC2=CC=CC=C21	15.15
333	C1=CC=C(C(=C1)CC(=O)[O-])NC2=C(C=CC=C2Cl)Cl.[Na+]	38.84
334	C1=CC=C(C(=C1)CC(=O)O)NC2=C(C=CC=C2Cl)Cl	65.42
335	C1=CC=C(C=C1)NC(=O)C2=CC=CC=C2I	21.4
336	CCOC1=C(C=CC(=C1)C(C)(C)C)C2COC(=N2)C3=C(C=CC=C3F)F	18.48
337	CN\1COCN(/C1=N/[N+](=O)[O-])CC2=CN=C(S2)Cl	0.6115
338	C1=CC=C(C=C1)CCOCCCS(=O)(=O)CCNCCC2=C3C(=C(C=C2)O)NC(=O)S3	42.5
339	C[C@]12CC[C@@H](CC1=CC[C@@H]3[C@@H]2CC[C@]4([C@H]3CC=C4C5=CN=CC=C5)C)O	54.95
340	C1=NC2=C(N1)C(=S)N=C(N2)N	2.36
341	CC(C)C1=NC(=CS1)CN(C)C(=O)N[C@@H](C(C)C)C(=O)N[C@@H](CC2=CC=CC=C2)C[C@@H]([C@H](CC3=CC=CC=C3)NC(=O)OCC4=CN=CS4)O	8.567
342	CC[C@H](C)[C@@H]1[C@H](C=C[C@@]2(O1)C[C@@H]3C[C@H](O2)C/C=C(/[C@H]([C@H](/C=C/C=C/4\CO[C@H]5[C@@]4([C@@H](C=C([C@H]5O)C)C(=O)O3)O)C)O[C@H]6C[C@@H]([C@H]([C@@H](O6)C)O[C@H]7C[C@@H]([C@H]([C@@H](O7)C)NC)OC)OC)\C)C.C1=CC=C(C=C1)C(=O)O	0
343	CCC(C)(C(=O)CCl)NC(=O)C1=CC(=C(C(=C1)Cl)C)Cl	4.186
344	C1=CC=C(C=C1)NC2=CC=C(C=C2)N=O	839
345	C1=CC=C(C=C1)C[N+]2=CC=CC3=CC=CC=C32.[Cl-]	7.31
346	CC1(CC2=C(O1)C(=CC=C2)O)C	0
347	CC1(CC2=C(O1)C(=CC=C2)OC(=O)NC)C	0
348	CCOC1=CC=C(C=C1)N	13.8
349	CCN1CCCC1CNC(=O)C2=C(C=CC(=C2)S(=O)(=O)N)OC	0
350	CC(C)CC1=CC=C(C=C1)C(C)C(=O)O	10.12
351	CCCN(CCC)C1=C(C=C(C=C1[N+](=O)[O-])C(F)(F)F)[N+](=O)[O-]	210
352	CC(C)(C1=CC=CC=C1CC[C@H](C2=CC=CC(=C2)/C=C/C3=NC4=C(C=CC(=C4)Cl)C=C3)SCC5(CC5)CC(=O)O)O	29.6
353	CC(C)C1=C(C=C(C=C1)C(=O)N=C(N)N)S(=O)(=O)C.CS(=O)(=O)O	0
354	C1CC1[C@@]2(C3=CC=CC=C3NC(=O)N2)C#CC4=CC=CC=N4	0
355	CC(C)(C(=O)N[C@H](COCC1=CC=CC=C1)C(=O)N2CCC3(CC2)CN(C4=CC=CC=C34)S(=O)(=O)C)N	14.45
356	CN(C)NC(=O)CCC(=O)O	2.29
357	CCC1=C(C(=CC=C1)CC)N(COC)C(=O)CCl	62.9
358	CC(C)NC1=NC(=NC(=N1)OC)NC(C)C	8.17
359	CC1=CC(=CC(=C1)C(=O)N(C(C)(C)C)NC(=O)C2=C(C(=CC=C2)OC)C)C	16.2
360	C[C@@]1(C(=O)N(C(=N1)SC)NC2=CC=CC=C2)C3=CC=CC=C3	17.74
361	C1C(=O)NC2=C(C=C(C=C2)[N+](=O)[O-])C(=N1)C3=CC=CC=C3Cl	15
362	CN1C(=O)CN=C(C2=C1C=CC(=C2)[N+](=O)[O-])C3=CC=CC=C3F	1.09
363	CC(C)(C)OC	4.64
364	CCOC(=O)CC(C(=O)OCC)SP(=O)(OC)OC	55.9
365	CCCCC1=CC=C(C=C1)O	127
366	CCCC[N+](CCCC)(CCCC)CCCC.[Br-]	0.364
367	CC(C)(/C=N/OC(=O)NC)S(=O)(=O)C	0
368	C1CC1CN2CC[C@]34[C@@H]5C(=O)CC[C@]3([C@H]2CC6=C4C(=C(C=C6)O)O5)O	17.91
369	CN(C)CC/C=C/1\C2=CC=CC=C2COC3=CC=CC=C31	13
370	CC(=NOC(=O)NC)SC	2.05
371	C1=C(C=C(C(=C1Br)O)Br)C#N	7.866
372	CC1=CC=C(C=C1)C2=CC(=NN2C3=CC=C(C=C3)S(=O)(=O)N)C(F)(F)F	25.7
373	C1=CC=C(C=C1)N2C(=O)C(=C(C=N2)N)Cl	1.871
374	C1=CC(=NC(=C1Cl)C(=O)O)Cl	0.934
375	CN1C=C(C2=CC=CC=C21)C3=C(C(=O)NC3=O)C4=CN(C5=CC=CC=C54)C6CCN(CC6)CC7=CC=CC=N7	6
376	CCC1=C(C2=C(N1CC3=CC=CC=C3)C=CC=C2OCC(=O)OC)C(=O)C(=O)N	50.12
377	CN(C)C(=O)C1=C(C=C(C=C1)NC=O)S(=O)(=O)NC(=O)NC2=NC(=CC(=N2)OC)OC	0
378	CN(C)CCCN1C2=CC=CC=C2CCC3=C1C=C(C=C3)Cl.Cl	0
379	COC(=O)[C@]12CC3=C(C1=NN(CO2)C(=O)N(C4=CC=C(C=C4)OC(F)(F)F)C(=O)OC)C=CC(=C3)Cl	31.36
380	C1=CC=C(C(=C1)C2=C3C=C(C(=O)C(=C3OC4=C(C(=C(C=C24)Br)[O-])Br)Br)Br)C(=O)[O-].[Na+].[Na+]	0
381	CN(C(=O)NC1=CC=C(C=C1)Cl)OC	0
382	COC(=O)N(C1=CC=CC=C1COC2=NN(C=C2)C3=CC=C(C=C3)Cl)OC	53.93
383	CCC(CC)NC1=C(C(=NC(=C1)C)OC2=C(C=C(C=C2C)C)C)C	7.464
384	C(C(C(C(C(F)(F)S(=O)(=O)O)(F)F)(F)F)(F)F)(C(C(C(F)(F)F)(F)F)(F)F)(F)F	0
385	C1=CC=C(C=C1)OC(=O)C2=CC=C(C=C2)O	865
386	CCCCNC(=O)N1C2=CC=CC=C2N=C1NC(=O)OC	26
387	C[C@H]1CCCC(=O)CCC/C=C/C2=C(C(=CC(=C2)O)O)C(=O)O1	209
388	B([C@H](CC(C)C)NC(=O)[C@H](CC1=CC=CC=C1)NC(=O)C2=NC=CN=C2)(O)O	7.658
389	CCN1CCC2(CC1)COC3=C2C=C4C(=C3)CCN4C(=O)C5=CC=C(C=C5)C6=C(C=C(C=C6)C7=NN=C(O7)C)C.Cl	4.65
390	CCCCCCCCC1=CC=C(C=C1)O	15.65
391	CCCOC1=NN(C(=O)N1C)C(=O)[N-]S(=O)(=O)C2=CC=CC=C2C(=O)OC.[Na+]	0.91
392	CCCCCCCCOC1=CC(=C(C=C1)C(=O)C2=CC=CC=C2)O	807
393	CC(=O)C1=CC2=C(C=C1)OC([C@@H]([C@H]2NC(=O)C3=CC=C(C=C3)F)O)(C)C	0
394	CC(C)(C)NCC(C1=CC(=C(C=C1)O)CO)O	0
395	COC(=O)C1=C(C(=C(C(=C1Cl)Cl)C(=O)OC)Cl)Cl	38.62
396	CCCCN(CC)C1=C(C=C(C=C1[N+](=O)[O-])C(F)(F)F)[N+](=O)[O-]	17.34
397	C1[C@H]([C@H](CN1C(=O)[C@@H]([C@H](CC2=CC=CC=C2)NC(=O)C3=CC4=C(N3)C=CC(=C4)Cl)O)O)O	2.09
398	C1=CC=C(C(=C1)C2=CC=C(C=C2)Cl)NC(=O)C3=C(N=CC=C3)Cl	17.28
399	CCOC(=O)COC1=C(C=C(C(=C1)N2C(=O)C(=C(C=N2)C(F)(F)F)C)F)Cl	375
400	C1CN(CCN1CCC2=CC(=O)N(C3=C2C=CC(=C3)F)CC(=O)N)C4=NC=CC5=C4C=CS5	7.06
401	C(#N)C1=C(C(=C(C(=C1Cl)Cl)Cl)C#N)Cl	0
402	CCCCCCOC1=CC=C(C=C1)O	83.6
403	CCCN(CCC)C1=C(C=C(C=C1[N+](=O)[O-])S(=O)(=O)N)[N+](=O)[O-]	20.2
404	CCNC1=NC(=NC(=N1)Cl)NC(C)C	6.209
405	COC1=C(C=CC(=C1C(=O)O)Cl)Cl	0.6483
406	CC(C)N(C1=CC=CC=C1)C(=O)CCl	69.7
407	COC1=C(C=C2C(=C1)C(=NC(=N2)N3CCN(CC3)C(=O)C4=CC=CO4)N)OC	3.349
408	CCCN(CCC)C(=O)SCCC	25.1
409	C1=CC(=NC(=C1)Cl)C(Cl)(Cl)Cl	238
410	CC(C)OC1=C(C=C(C(=C1)N2C(=O)OC(=N2)C(C)(C)C)Cl)Cl	0
411	CCCCC1=C(C2=CC=CC=C2O1)C(=O)C3=CC(=C(C(=C3)I)OCCN(CC)CC)I.Cl	4.537
412	C1CN(CCN1CCCN2C(=O)N3C=CC=CC3=N2)C4=CC(=CC=C4)Cl	7.399
413	CC1=C(N(C2=C1C=C(C=C2)O)CC3=CC=C(C=C3)OCCN4CCCCCC4)C5=CC=C(C=C5)O	17.78
414	CCCCCCCC1=CC=C(C=C1)O	42.5
415	COC1=CC(=NC(=N1)NC(=O)[N-]S(=O)(=O)C2=C(C=CC=N2)OCC(F)(F)F)OC.[Na+]	0
416	CCSC(=O)N(CC(C)C)CC(C)C	52.51
417	COP(=O)(CCC(=O)NCO)OC	0.4575
418	CCO[Si](C)(OCC)OCC	1.871
419	COC1=C(C=CC(=C1)C2=CC(=C(C=C2)N)OC)N.Cl.Cl	3.23
420	C1=CC(=CC=C1OC2=CC=C(C=C2)Br)Br	12.4
421	C[C@@]1([C@H]2[C@@H]([C@H]3[C@@H](C(=O)C(=C([C@]3(C(=O)C2=C(C4=C1C=CC=C4O)O)O)O)C(=O)N)N(C)C)O)O.Cl	0
422	C(=O)(C(C(C(C(C(C(C(C(C(C(F)(F)F)(F)F)(F)F)(F)F)(F)F)(F)F)(F)F)(F)F)(F)F)(F)F)O	0
423	C1=CC=C2C3=C4C(=CC=C3)C5=CC=CC=C5C4=CC2=C1	5.564
424	C1CN(CCC1N2C3=CC=CC=C3NC2=O)CCCC(C4=CC=C(C=C4)F)C5=CC=C(C=C5)F	96.82
425	C1=CC=C2C(=C1)C3=CC=CC4=C3C2=CC=C4	8.064
426	CC(C)C1=C(C(=CC=C1)C(C)C)O	107
427	C[C@@H]1[C@H]([C@H](C[C@@H](O1)O[C@@H]2[C@H](O[C@H](C[C@@H]2O)O[C@@H]3[C@H](O[C@H](C[C@@H]3O)O[C@H]4CC[C@]5([C@@H](C4)CC[C@@H]6[C@@H]5C[C@H]([C@]7([C@@]6(CC[C@@H]7C8=CC(=O)OC8)O)C)O)C)C)C)O)O	0
428	COC1=CC(=NC(=N1)NC(=O)NS(=O)(=O)C2=C(C=CC(=C2)CNS(=O)(=O)C)C(=O)OC)OC	5.452
429	C1=CC2=C3C(=C1)C=CC3=CC=C2	12.38
430	C1=CC=C(C(=C1)N)NC(=O)C2=CC=C(C=C2)CNC(=O)OCC3=CN=CC=C3	0.7
431	CCOP(=S)(C1=CC=CC=C1)OC2=CC=C(C=C2)[N+](=O)[O-]	8.16
432	CC(C)(C)C1=NN=C(N(C1=O)N)SC	1.067
433	CN/C(=N\[N+](=O)[O-])/NCC1=CN=C(S1)Cl	10.73
434	C1=CC=C(C=C1)C2=C(OC(=N2)CCC(=O)O)C3=CC=CC=C3	4.673
435	C1CC1CONC(=O)C2=C(C(=C(C=C2)F)F)NC3=C(C=C(C=C3)I)Cl	13.83
436	CC(=C)C(=O)OCCC(C(C(C(C(C(F)(F)F)(F)F)(F)F)(F)F)(F)F)(F)F	196.9
437	C1=CC=C2C(=C1)N=C(S2)SCSC#N	29.6
438	CN(C)C(=O)NC1=CC=CC(=C1)C(F)(F)F	10.06
439	CCNC1=NC(=NC(=N1)Cl)NC(C)(C)C#N	3.158
440	C1(=C(C(=NC(=C1Cl)Cl)Cl)Cl)Cl	362
441	CC1=C(C(C(=C(N1)C)C(=O)OC)C2=CC=CC=C2[N+](=O)[O-])C(=O)OC	23.36
442	COC1=CN=C(N2C1=NC(=N2)NS(=O)(=O)C3=C(C=CC=C3OCC(F)F)C(F)(F)F)OC	0
443	CC(C1=CC(=CC=C1)C(=O)C2=CC=CC=C2)C(=O)O	4.673
444	C=CC(=O)NC1=CC=CC=C1	30.9
445	CCSC(=O)N1CCCCCC1	11.6
446	C[C@@H](C1=CC2=C(C=C1)C=C(C=C2)OC)C(=O)O	26.48
447	CCOP(=O)(NC(C)C)OC1=CC(=C(C=C1)SC)C	62.11
448	CC(C)C[C@H]1C(=O)N2CCC[C@H]2[C@]3(N1C(=O)[C@](O3)(C(C)C)NC(=O)[C@H]4CN([C@@H]5CC6=C(NC7=CC=CC(=C67)C5=C4)Br)C)O.CS(=O)(=O)O	178
449	CC1(CC(CC(N1[O])(C)C)O)C	10.4
450	CN1C(=O)CC(=O)N(C2=C1C=CC(=C2)Cl)C3=CC=CC=C3	27
451	C1=CC2=C(C=CC=C2N)C(=C1)N	0
452	C1=CC(=C(C=C1C2=C(C=C(C=C2)F)F)C(=O)O)O	3.037
453	CC1(OC2=C(O1)C(=CC=C2)OC(=O)NC)C	21.66
454	CC(C)(C)NCC(C1=CC(=CC(=C1)O)O)O	0
455	CC(C)N(C(C)C)C(=O)SCC(=C(Cl)Cl)Cl	2.891
456	C1COCCC1(C(=O)NO)NS(=O)(=O)C2=CC=C(C=C2)OC3=CC=C(C=C3)F	2.27
457	CCOP(=S)(OCC)SCN1C2=C(C=C(C=C2)Cl)OC1=O	25.1
458	CC1=C(N=C(N=C1OC(=O)N(C)C)N(C)C)C	22.53
459	CC(C)(C)C1=CC=C(C=C1)OC2CCCCC2OS(=O)OCC#C	24
460	CNC(=O)O/N=C(/C(=O)N(C)C)\SC	0
461	CCCCOCN(C1=C(C=CC=C1CC)CC)C(=O)CCl	100.8
462	CC(C(C1=CC=C(C=C1)O)O)N2CCC(CC2)CC3=CC=CC=C3	56.72
463	CNC(=O)OC1=CC=CC(=C1)N=CN(C)C.Cl	13.72
464	CCCCC[C@@H](CC(=O)CCC1=CC(=C(C=C1)O)OC)O	146
465	CCN(CC1=CC(=CC=C1)S(=O)(=O)[O-])C2=CC=C(C=C2)C(=C3C=CC(=[N+](CC)CC4=CC(=CC=C4)S(=O)(=O)[O-])C=C3)C5=C(C=C(C=C5)O)S(=O)(=O)[O-].[Na+].[Na+]	0
466	COC(=O)NC(=S)NC1=CC=CC=C1NC(=S)NC(=O)OC	2.469
467	C1=CC=C(C=C1)C(C2=CC=CC=C2)(C3=CC=CC=C3Cl)N4C=CN=C4	77.1
468	C12(C3(C4(C5(C3(C(C1(C5(C2(C4(Cl)Cl)Cl)Cl)Cl)(Cl)Cl)Cl)Cl)Cl)Cl)Cl	0
469	CC[NH+]=C1C=CC(=C(C2=CC=C(C=C2)N(CC)CC)C3=CC=C(C=C3)N(CC)CC)C4=CC=CC=C14.[Cl-]	3.21
470	C[C@@H]1C[C@H]2[C@@H]3CCC4=CC(=O)C=C[C@@]4([C@]3([C@H](C[C@@]2([C@]1(C(=O)COP(=O)([O-])[O-])O)C)O)F)C.[Na+].[Na+]	9.63
471	CC(C)(C#C)NC(=O)C1=CC(=CC(=C1)Cl)Cl	5.4
472	CCOP(=S)(OCC)OC1=NN(C=N1)C2=CC=CC=C2	30.2
473	CC1=CC(=C(C=C1)O)C(C)(C)C	20.9
474	C1=CC(=CC=C1COC(CN2C=CN=C2)C3=C(C=C(C=C3)Cl)Cl)Cl.[N+](=O)(O)[O-]	6.02
475	CC1=C(C(=C(C=C1)C)O)C	106
476	CN1CCN2C(C1)C3=CC=CC=C3CC4=CC=CC=C42	5.841
477	CC1=C2COC(=O)C2=C(C(=C1OC)C/C=C(\C)/CCC(=O)O)O	14.79
478	C1C(O1)CN2C(=O)N(C(=O)N(C2=O)CC3CO3)CC4CO4	180
479	CCCCCCCCCCCCCN1CC(OC(C1)C)C	12.91
480	CN(C)C1=CC=C(C=C1)C(=N)C2=CC=C(C=C2)N(C)C.Cl	8.66
481	C1=CC=C(C(=C1)CC2=CC=C(C=C2)O)O	56.8
482	C1=CC=C2C(=C1)N=C(S2)[S-].[Na+]	41.7
483	CC1=NC=CN1C2=CC=C(C=C2)SC3=CC=CC(=C3)C4(CCOCC4)C(=O)N.CS(=O)(=O)O	2.79
484	CC(C)(C(=O)N[C@H](CC1=CNC2=CC=CC=C21)C(=O)N3CCC[C@](C3)(CC4=CC=CC=C4)C(=O)N(C)N(C)C)N	8.91
485	CC(C)N1C(=O)C2=CC=CC=C2NS1(=O)=O	0
486	C1=CC(=C(C=C1C2=C(SC(=N2)N)C3=CC=NC=C3)Cl)Cl	19.05
487	C1=CC=C(C=C1)COC(=O)C2=CC=CC=C2C(=O)O	0
488	CCOP(=S)(NC(C)C)OC1=CC=CC=C1C(=O)OC(C)C	158
489	C[C@H]1[C@H]([C@H](C[C@@H](O1)O[C@H]2C[C@@](CC3=C2C(=C4C(=C3O)C(=O)C5=C(C4=O)C(=CC=C5)OC)O)(C(=O)CO)O)N)O.Cl	0
490	C1CN(CCC1CC2=CC=C(C=C2)F)CCS(=O)C3=CC4=C(C=C3)NC(=O)O4	5.31
491	CCCOC(=O)NCCCN(C)C.Cl	5.815
492	CC(C)C[C@H]1C(=O)N2CCC[C@H]2[C@]3(N1C(=O)[C@](O3)(C(C)C)NC(=O)[C@H]4CN([C@@H]5CC6=C(NC7=CC=CC(=C67)C5=C4)Br)C)O	37
493	CC1=CC(=C(C=C1)C)OCCCC(C)(C)C(=O)O	52.18
494	CCOC1=NC(=NS1)C(Cl)(Cl)Cl	127
495	CC1=CC(=C(C=C1S(=O)(=O)[O-])OC)N=NC2=C(C=CC3=C2C=CC(=C3)S(=O)(=O)[O-])O.[Na+].[Na+]	0
496	C1(=C(N=C(C(=N1)Cl)N)N)C(=O)N=C(N)N	3
497	CC1=CC=C(C=C1)C(=O)C2=CC=C(N2C)CC(=O)O	9.12
498	CCOC1C(C2=C(O1)C=CC(=C2)OS(=O)(=O)C)(C)C	17.64
499	CCC(C)NC1=NC(=NC(=N1)NCC)OC	6.53
500	C1=CC=C2C(=C1)C(=O)NS2	34.74
501	CCCCCCCCN1C(=O)C=CS1	12.72
502	COC1=CC(=C(C=C1Cl)OC)Cl	6.309
503	CC1([C@@H](N2[C@H](S1)[C@@H](C2=O)NC(=O)[C@@H](C3=CC=C(C=C3)O)N)C(=O)O)C	3
504	CC1CC2=CC=CC=C2N1NC(=O)C3=CC(=C(C=C3)Cl)S(=O)(=O)N	4.9
505	CC(C)(C)NC[C@@H](COC1=NSN=C1N2CCOCC2)O	3.816
506	CCCCCCCCCCCCN1CCCC1=O	19.1
507	CCCC1=CC=C(C=C1)N	17.3
508	CN1CCC(CC1)C2=C(C(=NN2)C3=CC=C(C=C3)Cl)C4=NC=NC=C4	9.087
509	C1CN(CCC1C2=C(C(=NN2)C3=CC=C(C=C3)Cl)C4=NC=NC=C4)C(=O)CO	2.362
510	CNC1=C(C(=O)N(N=C1)C2=CC=CC(=C2)C(F)(F)F)Cl	11.09
511	CC(C)(C1=CC=CC=C1)C2=CC(=C(C=C2)O)C(C)(C)C3=CC=CC=C3	128
512	C1=CC(=CC=C1N=NC2=C(C=CC3=C2C=CC(=C3)S(=O)(=O)[O-])O)S(=O)(=O)[O-].[Na+].[Na+]	18.9
513	CCCC1=CC(=C(C=C1)O)OC	24.6
514	C(C(C(C(C(F)(F)S(=O)(=O)[O-])(F)F)(F)F)(F)F)(C(C(C(F)(F)F)(F)F)(F)F)(F)F.[K+]	0
515	CC(C1=CC=C(C=C1)O)(C2=CC=C(C=C2)O)C3=CC=C(C=C3)O	30.8
516	C1CN(C[C@@H]1O)CC2=CC=CC=C2C3=CC=C(C=C3)N4CCC5=C(C4=O)N(N=C5C(F)(F)F)C6=CC7=C(C=C6)ON=C7N	6.75
517	CCN(CC)C(=O)SCC1=CC=C(C=C1)Cl	233
518	CC1=C(C=C(C=C1)N)O	16
519	CC1=C(C(=O)C[C@@H]1OC(=O)[C@@H]2[C@H](C2(C)C)C=C(C)C)CC=C	45.9
520	CC1=CC=C(C=C1)N2C(=CC(=N2)C(C)(C)C)NC(=O)NC3=CC=C(C4=CC=CC=C43)OCCN5CCOCC5	42.66
521	CN1CCN(CC1)CC(=O)N2C3=CC=CC=C3C(=O)NC4=C2N=CC=C4	0
522	CCC1=C(N(N=C1C(=O)NN2CCCCC2)C3=C(C=C(C=C3)Cl)Cl)C4=CC=C(C=C4)Br	0
523	CC1=NN=C2N1C3=C(C=C(C=C3)Cl)C(=NC2)C4=CC=CC=C4Cl	2.492
524	CC1=NN=C2N1C3=C(C=C(C=C3)Cl)C(=NC2)C4=CC=CC=C4	0.3894
525	CC1=CC(=CC(=C1OC2=C3CCCC3=C(C=C2)O)C)NC(=O)C(=O)O	0
526	CCCN(CCC)C1=C(C=C(C(=C1[N+](=O)[O-])N)C(F)(F)F)[N+](=O)[O-]	7.216
527	CC1=CN=C(C=N1)C(=O)NCCC2=CC=C(C=C2)S(=O)(=O)NC(=O)NC3CCCCC3	1.597
528	CC(C)NCC(COC1=CC=C(C=C1)CC(=O)N)O	1.986
529	CN(C)CC1CCCCC1(C2=CC(=CC=C2)OC)O	1.432
530	CC1=C[C@@H]2[C@H](CC[C@]3([C@H]2CC(=C)[C@@]3(C(=O)C)OC(=O)C)C)[C@@]4(C1=CC(=O)CC4)C	41.4
531	CCOP(=S)(OCC)OC1=NC(=C(C=C1Cl)Cl)Cl	2.6
532	CCN(CC)C1=NC(=CC(=N1)OP(=S)(OC)OC)C	49.7
533	C1=CC=C(C=C1)S(=O)(=O)N(CC(F)(F)F)C2=CC=C(C=C2)C(C(F)(F)F)(C(F)(F)F)O	5.37
534	C(C(C(F)(F)S(=O)(=O)[O-])(F)F)(C(F)(F)F)(F)F.[K+]	1.152
535	CCCCCCCC[Si](OCC)(OCC)OCC	11.06
536	CC(C1=CC(=CC=C1)OC2=CC=CC=C2)C(=O)O	11.29
537	C1=CC(=CC=C1C(C2=CC=C(C=C2)O)C(Cl)(Cl)Cl)O	136.5
538	COP(=S)(OC)OC1=CC=C(C=C1)[N+](=O)[O-]	14.19
539	CCOP(=S)(OCC)SCSCC	0
540	CCOP(=S)(OCC)SCCSCC	412
541	CCCCC(CC)COP(=O)(O)OCC(CC)CCCC	9.993
542	C1=CC=C2C(=C1)C=CC3=CC=CC=C3N2C(=O)N	2.375
543	COC1=C2C(=CC3=C1OC=C3)C=CC(=O)O2	0
544	CC(CC1=CC=CC=C1)N	0.511
545	CCCCCCCCCCCCCOS(=O)(=O)[O-].[Na+]	43.1
546	CC1=C(C(CCC1)(C)C)/C=C/C(=C/C=C/C(=C/C(=O)O)/C)/C	10.5
547	C[N+](C)(C)CC1CO1.[Cl-]	0
548	CC1=CN(C(=O)NC1=O)[C@H]2C[C@@H]([C@H](O2)CO)N=[N+]=[N-]	2.414
549	CC(=O)NP(=O)(OC)SC	0
550	C(C(F)(F)F)(Cl)Cl	51.48
551	C(=O)(C(C(C(C(C(F)(F)F)(F)F)(F)F)(F)F)(F)F)O	0
552	C1[C@@H]2C=C[C@H]1[C@H]3[C@@H]2[C@]4(C(=C([C@@]3(C4(Cl)Cl)Cl)Cl)Cl)Cl	0
553	CCOC1=CC2=C(C=C1)C=CC(=O)O2	35.48
554	CCOP(=O)(OCC)OC1=CC=C(C=C1)[N+](=O)[O-]	0
555	CC1=CC(=C(C=C1)N=NC2=C(C=CC3=CC=CC=C32)O)C	0
556	CCNP(=S)(OC)O/C(=C/C(=O)OC(C)C)/C	16.24
557	CCC1=C(C=C2CC(CC2=C1)NC[C@@H](C3=C4C=CC(=O)NC4=C(C=C3)O)O)CC	5.05
558	CCC(C)N1C(=O)C(=C(NC1=O)C)Br	0
559	CC(C)(C)CC(C)(C)C1=CC(=C(C=C1)O)N2N=C3C=CC=CC3=N2	5.87
560	C1(C(C(C(C(C1Cl)Cl)Cl)Cl)Cl)Cl	0
561	C1CCC2=NC3=CC=CC=C3C(=C2C1)N	1000
562	C1=CC=C2C(=C1)C3=CC=CC=C3C2(C4=CC=C(C=C4)O)C5=CC=C(C=C5)O	22.4
563	C1=CC(=C(C=C1C2=CC(=C(C=C2)Cl)Cl)Cl)Cl	6.83e-05
564	CC12CC1(C(=O)N(C2=O)C3=CC(=CC(=C3)Cl)Cl)C	5.32
565	CN(C)C(=O)NC1=CC(=C(C=C1)Cl)Cl	12.15
566	CN(C(=O)NC1=CC(=C(C=C1)Cl)Cl)OC	33.05
567	CC1=CC(=C(C=C1)N=CN(C)C=NC2=C(C=C(C=C2)C)C)C	33.3
568	C1=CC(=CC=C1/C=C/C(=O)CC(=O)/C=C/C2=CC=C(C=C2)O)O	112
569	CCCCCC1=CC=C(C=C1)N	18.2
570	CCCCCCC1=CC=C(C=C1)N	440
571	C1=C(C=C(C=C1Cl)Cl)C2=CC(=CC(=C2)Cl)Cl	3.33e-05
572	CC(=O)O[C@@H]1[C@@H](SC2=CC=CC=C2N(C1=O)CCN(C)C)C3=CC=C(C=C3)OC.Cl	23.48
573	CCOP(=S)(OCC)OC1=NC(=NC(=C1)C)C(C)C	30.5
574	CC1=C(N(C(=C1)CC(=O)O)C)C(=O)C2=CC=C(C=C2)Cl	3
575	COC(=O)NS(=O)(=O)C1=CC=C(C=C1)N	1.8
576	CS(=O)(=O)C1=C(C(=C(C=C1)C(=O)C2C(=O)CCCC2=O)Cl)COCC(F)(F)F	0
577	C(=O)(C(C(C(C(C(C(C(F)(F)F)(F)F)(F)F)(F)F)(F)F)(F)F)(F)F)O	1.644
578	C(=O)(C(C(C(C(C(C(C(C(C(F)(F)F)(F)F)(F)F)(F)F)(F)F)(F)F)(F)F)(F)F)(F)F)O	0
579	CCC(C)NC1=C(C=C(C=C1[N+](=O)[O-])C(C)(C)C)[N+](=O)[O-]	31.35
580	C1=CC(=C(C=C1Cl)O)OC2=C(C=C(C=C2)Cl)Cl	27.8
581	CCCN(CCC)C1=C(C=C(C=C1[N+](=O)[O-])C(C)C)[N+](=O)[O-]	12.5
582	C1=C(C=C(C(=C1Cl)C2=C(C=C(C=C2Cl)Cl)Cl)Cl)Cl	9.24e-06
583	CC(C)(C)C1=NN=C(S1)N(C)C(=O)NC	5.282
584	CC(C)C1=CC=C(C=C1)NC(=O)N(C)C	0
585	CCC1=CC=CC(=C1N(COCC)C(=O)CCl)C	84.71
586	C1=CC=C2C(=C1)C(OS2(=O)=O)(C3=CC=C(C=C3)O)C4=CC=C(C=C4)[O-].[Na+]	0
588	C1=CC2=C(C=C1F)SC(=N2)N	5.75
589	C1CCC(CC1)CCC[C@H](CC(=O)NO)C2=NC(=NO2)C(=O)N	14.91
590	COC1=C(C=C(C=C1)Cl)C(=O)N2CCN(CC2)C3=CC(=CC=C3)Cl	47.25
591	CC(C(=O)C1=CC(=CC=C1)Cl)NC(C)(C)C	16.98
592	C1=C(C(=CC(=C1Cl)Cl)Cl)C2=CC(=C(C=C2Cl)Cl)Cl	2.72e-06
593	CC(C)N(CC1=CC=CC=C1)C(=O)C(C)(C)C	9.846
594	C1=CC(=C(C(=C1)F)C(=O)NC(=O)NC2=CC=C(C=C2)Cl)F	0
595	C(C(C(C(F)(F)S(=O)(=O)O)(F)F)(F)F)(C(C(F)(F)F)(F)F)(F)F	0
596	C=CCOC(CN1C=CN=C1)C2=C(C=C(C=C2)Cl)Cl	1.025
597	COP(=O)(OC)SCN1C2=C(C=C(C=N2)Cl)OC1=O	429
598	C[C@@H]1CN(CCN1C(=O)C(=O)C2=CNC3=C2C=CC=N3)C(=O)C4=CC=CC=C4	0.09545
599	CC(C1=C(C(=CC(=C1)C(C)(C)C)C(C)(C)C)O)C2=C(C(=CC(=C2)C(C)(C)C)C(C)(C)C)O	0.383
600	COC1=C(C=CC(=C1)CCC(=O)CC(=O)CCC2=CC(=C(C=C2)O)OC)O	173
601	CN1CCN(CC1)C2=CC=CC=C2/C=C\3/C(=O)N(CCS3)C4=CC(=C(C=C4)Cl)Cl	21.1
602	CO/N=C(\C1=CC=CC=C1OC2=C(C(=NC=N2)OC3=CC=CC=C3Cl)F)/C4=NOCCO4	16.35
603	CCN(CC)CCNC(=O)C1=CC(=C(C=C1OC)N)Cl	2.57
604	C1CCC2(C1)CC(=O)N(C(=O)C2)CCCCN3CCN(CC3)C4=NC=CC=N4	7.66
605	CC(C)NC(=O)N1CC(=O)N(C1=O)C2=CC(=CC(=C2)Cl)Cl	11.7
606	CCOP(=S)(OCC)OP(=S)(OCC)OCC	101
607	CC(CCC1=CC=CC=C1)NCC(C2=CC(=C(C=C2)O)C(=O)N)O	5.841
608	C1=CC=C(C=C1)C(C2=CC=C(C=C2)Cl)C(=O)C3C(=O)C4=CC=CC=C4C3=O	0
609	CC1=C2C(=CC=C1)N=C(N(C2=O)C3=CC=CC=C3C)CN4C=NC5=C(N=CN=C54)N	10.96
610	C1=CC=C(C=C1)OC2=CC=CC(=C2)C(=O)O	0
611	CCCC(=O)NC1=CC(=C(C=C1)OCC(CNC(C)C)O)C(=O)C	1.986
612	C(C(C(F)(F)S(=O)(=O)O)(F)F)(C(F)(F)F)(F)F	1.152
613	C(=O)(C(C(C(C(C(C(F)(F)F)(F)F)(F)F)(F)F)(F)F)(F)F)O	0
614	C(=O)(C(C(C(C(C(C(C(C(F)(F)F)(F)F)(F)F)(F)F)(F)F)(F)F)(F)F)(F)F)O	0
615	C1CC1N2C3=C(C=NC=C3)N(C2=O)CC4=NC5=CC=CC=C5N4CCCO	15.75
616	C(=O)(C(C(C(C(C(C(C(F)(F)F)(F)F)(F)F)(F)F)(F)F)(F)F)(F)F)[O-].[NH4+]	0
617	CCCCN1CCCCC1C(=O)NC2=C(C=CC=C2C)C	13.24
618	C1=CC(=C(C(=C1Cl)C2=C(C=CC(=C2Cl)Cl)Cl)Cl)Cl	0.00027
619	CN(C)CCCN(C)CCCN(C)C	0
620	C(C(C(C(F)(F)S(=O)(=O)[O-])(F)F)(F)F)(C(C(F)(F)F)(F)F)(F)F.[K+]	0
621	CC(C)OC1=CC=C(C=C1)NC(=O)N2CCN(CC2)C3=NC=NC4=CC(=C(C=C43)OC)OCCCN5CCCCC5	0.9947
622	CCN1C=C(C(=O)C2=C1N=C(C=C2)C)C(=O)O	1.1
623	C1=CC(=C(C=C1I)F)NC2=C(C=CC(=C2F)F)C(=O)NOC[C@@H](CO)O	3.744
624	CC1(C(C1(C)C)C(=O)OC(C#N)C2=CC(=CC=C2)OC3=CC=CC=C3)C	19.7
625	CCOC(=O)C1=C(NC(=C(C1C2=CC(=CC=C2)[N+](=O)[O-])C(=O)OC)C)C	12.07
626	C1=CC=C(C=C1)C2=NC3=C(N=C(N=C3N=C2N)N)N	0
627	CCCCCCOC1=CC=C(C=C1)N	79.3
628	CCC(CC)NC1=C(C=C(C(=C1[N+](=O)[O-])C)C)[N+](=O)[O-]	7.214
629	C1=CC=C2C(=C1)C(=CN2)CCN(CCO)CC3=CC=C(C=C3)/C=C/C(=O)NO	23.62
630	COC1=C(C=C(C(=C1)O)C(=O)C2=CC=CC=C2)S(=O)(=O)O	1.05
631	CC(C1=CC=C(C=C1)C(=O)C2=CC=CS2)C(=O)O	9.77
632	CCCSP(=O)(OCC)OC1=C(C=C(C=C1)Br)Cl	141
633	CCC1=C2C(=CC=C1)C3=C(N2)C(OCC3)(CC)CC(=O)O	7.9
634	CN1CCC2=C3[C@H]1CC4=C(C3=CC=C2)C(=C(C=C4)O)O.CN1CCC2=C3[C@H]1CC4=C(C3=CC=C2)C(=C(C=C4)O)O.O.Cl.Cl	17.4
635	CC1=NN=C(C(=O)N1N)C2=CC=CC=C2	0
636	C1=CC=C(C=C1)NS(=O)(=O)C2=CC=CC(=C2)/C=C/C(=O)NO	0.7
637	CCNS(=O)(=O)C(C(C(C(C(C(C(C(F)(F)F)(F)F)(F)F)(F)F)(F)F)(F)F)(F)F)(F)F	3.48
638	CC1=C(C2=C(N1C3=C4C=CC(=CC4=NC=C3)Cl)C=CC(=C2)OC)CC(=O)O	1.4
639	CC(C)(C)NCC(COC1=CC=CC2=C1C[C@@H]([C@@H](C2)O)O)O	3.193
640	CC(=O)O[C@@H]1[C@@H](SC2=CC=CC=C2N(C1=O)CCN(C)C)C3=CC=C(C=C3)OC	13.63
641	CCOP(=S)(OCC)OC1=NN(C(=N1)Cl)C(C)C	19.53
642	CC(=O)[C@]1(CC[C@@H]2[C@@]1(CC[C@H]3[C@H]2C=C(C4=CC(=O)[C@@H]5C[C@@H]5[C@]34C)Cl)C)OC(=O)C	4.46
643	COC1=CC(=C(C=C1)OC)C(CNC(=O)CN)O	3
644	CCOC1=C(C=CC(=C1)OC2=C(C=C(C=C2)C(F)(F)F)Cl)[N+](=O)[O-]	0
645	C1[C@@H]([C@H](O[C@H]1N2C=NC3=C(N=C(N=C32)Cl)N)CO)O	0
646	CC[C@@]12CCCN3[C@@H]1C4=C(CC3)C5=CC=CC=C5N4C(=C2)C(=O)OCC	0.000936
647	CC(C)(C)C(=O)C(N1C=NC=N1)OC2=CC=C(C=C2)Cl	14.59
648	C(C(F)(F)F)(C(F)(F)F)F	5.048
649	CN1C(=CC(=[N+]1C)C2=CC=CC=C2)C3=CC=CC=C3.COS(=O)(=O)[O-]	0
650	CCCCOC1=CC=C(C=C1)N	28.4
651	COC(=O)C1=CC=CC=C1C(=O)O	0
652	CCCCC(CC)COC(=O)C1=CC=CC=C1C(=O)O	0
653	CCOC1=NOC2=C1C=CC(=C2)OCCC3CCN(CC3)C4=NN=C(C=C4)C	29.51
654	CN1C(=O)CN=C(C2=C1C=CC(=C2)Cl)C3=CC=CC=C3	2.181
655	C1COCCN1C=O	0.4016
656	CN(C)C(=O)[C@@H]1C[C@H](CN1[C@]2(C3=C(C=CC(=C3)Cl)N(C2=O)S(=O)(=O)C4=C(C=C(C=C4)OC)OC)C5=CC=CC=C5OC)O	35.3
657	[Na+].CC1=CC(=O)/C(/C(=O)O1)=C(/C)[O-]	0
658	CC1=NC=C(N1CCO)[N+](=O)[O-]	3
659	CCC(CC)[C@@H](CO)NS(=O)(=O)C1=CC=C(S1)Cl	35.53
660	C[C@H]1C[C@@H]2[C@H]([C@H]([C@]3(O2)CC[C@H]4[C@@H]5CC=C6C[C@H](CC[C@@]6([C@H]5CC4=C3C)C)O)C)NC1	29.4
661	C[C@H](C(=O)O)OC1=CC(=C(C=C1)CNC(=O)C2=C(N=CC=C2)OC3=CC4=C(C=C3)OCO4)F	0
662	C1=CC(=CC=C1C2=COC3=CC(=CC(=C3C2=O)O)O)O	18.69
663	CN1C=NC(=C1SC2=NC=NC3=C2NC=N3)[N+](=O)[O-]	0
664	COC1=C(C=CC(=C1)/C=C/C(=O)CC(=O)/C=C/C2=CC(=C(C=C2)O)OC)O	297
665	CN1CCN(CC1)C(=O)C2=CC3=C(N2)C=CC(=C3)Cl	10.12
666	C1=CC(=CC(=C1)N(CC2=CN=CC=C2)C3=CC(=C(C=C3)OC(F)F)OC(F)F)C(=O)O	7.69
667	C=CCN1CC[C@]23[C@@H]4C(=O)CC[C@]2([C@H]1CC5=C3C(=C(C=C5)O)O4)O	65.03
668	C[C@@H]1CC(=O)C=C2[C@]1(C[C@@H](CC2)C(=C)C)C	172
669	CCC(=O)O[C@](CC1=CC=CC=C1)(C2=CC=CC=C2)[C@H](C)CN(C)C	11
670	CC1=CC(=C(C(=C1C(=O)OC)O)C)O	268
671	CC(C)[C@@H](C(=O)N[C@H]1CC2=CC=CC=C2[C@H]3CCC[C@H](N3C1=O)C(=O)O)SC(=O)C	5.55
672	C[C@]12CC[C@H]3C(=CCC4=C3C=CC(=C4)O)[C@@H]1CCC2=O	9.74
673	CN(C)C(=O)C1(CCN(CC1)CCC2(CN(CCO2)C(=O)C3=CC=CC=C3)C4=CC(=C(C=C4)Cl)Cl)N5CCCCC5	13.6
674	C1=CC=C(C=C1)C2=CC(=O)C3=C(C=C(C=C3O2)O)O	204
675	CN1C2=C(C=C(C=C2)NC(=O)C3=CC=CC=C3C4=CC=C(C=C4)C(F)(F)F)C=C1C(=O)N[C@@H](C5=CC=CC=C5)C(=O)N(C)CC6=CC=CC=C6	3.377
676	C1=CC=C2C(=C1)C=C(C3=CC=CC=C23)O	20.98
677	CC1=CC=C(C=C1)/C(=C\CN2CCCC2)/C3=CC=CC=N3	4.3
678	CN1[C@@H](CCC1=O)C2=CN=CC=C2	0
679	C1=CC(=CC=C1C2=COC3=C(C2=O)C=CC(=C3)O)O	15.4
680	C1CC=CCCC=CCCC=C1	17.28
681	COC1=CC=C(C=C1)C2=COC3=CC(=CC(=C3C2=O)O)O	230
682	CN(C)C1=CC=C(C=C1)N=NC2=CC=CC=C2C(=O)O	11.1
683	CCCCCCCC1=C(NC2=C(C1=O)C=CC(=C2)OC)C	27.79
684	CC(C)OC(=O)C(C)(C)OC1=CC=C(C=C1)C(=O)C2=CC=C(C=C2)Cl	563
685	CC1=CC(=C(C=C1)N)N	8.27
686	CC1=C(C(=NN1)C)CC2=C(C3=C(S2)N(C(=O)N(C3=O)C)CC(C)C)C(=O)N4C[C@@H](CO4)O	1
687	C[C@@H]1C[C@H]2[C@@H]3CCC4=CC(=O)C=C[C@@]4([C@]3([C@H](C[C@@]2([C@]1(C(=O)CO)O)C)O)F)C	1.791
688	CC(CC1=CC(=C(C=C1)O)O)C(C)CC2=CC(=C(C=C2)O)O	270
689	C1=CC=C(C=C1)C(=O)NC2=NC3=CC=CC=C3S2	77.62
690	CCC1(C(=O)NC(=O)NC1=O)C2=CC=CC=C2	0
691	CC1=C(N=C(O1)C2=CC=CC=C2)CCOC3=CC=CC4=C3C=CN4CCC(=O)O	3.4
692	C1=CC(=CC=C1/C=C/C2=CC(=CC(=C2)O)O)O	62.9
693	C[C@]12CCC(=O)C=C1CC[C@@H]3[C@@H]2[C@H](C[C@]4([C@H]3CC[C@@H]4C(=O)CO)C)O	12.1
694	C[C@]12CCC(=O)C=C1CC[C@@H]3[C@@H]2[C@H](C[C@]4([C@H]3CC[C@@]4(C(=O)CO)O)C)O	8.567
695	C[C@]12C[C@@H]([C@H]3[C@H]([C@@H]1CC[C@@]2(C(=O)CO)O)CCC4=CC(=O)C=C[C@]34C)O	5.841
696	C[C@]12CC[C@H]3[C@H]([C@@H]1CC[C@@H]2O)CCC4=C3C=CC(=C4)O	56.9
697	C1=CC(=CC=C1C(C2=CC=C(C=C2)Cl)C(Cl)(Cl)Cl)Cl	12.5
698	C1=CC=C2C3=C4C(=CC2=C1)C=CC5=C4C(=CC=C5)C=C3	3.713
699	CC1(C(=O)N(C(=O)O1)C2=CC(=CC(=C2)Cl)Cl)C=C	18.34
700	CNCCCN1C2=CC=CC=C2CCC3=CC=CC=C31	29.98
701	CN(C)CCC=C1C2=CC=CC=C2CCC3=CC=CC=C31	12.46
702	CN(C)CCCN1C2=CC=CC=C2CCC3=CC=CC=C31	35.05
703	CC(C)NC[C@H](COC1=CC=CC2=CC=CC=C21)O	8.956
704	CN1CCCCC1CCN2C3=CC=CC=C3SC4=C2C=C(C=C4)SC	0.915
705	CN(C)CCCN1C2=CC=CC=C2SC3=C1C=C(C=C3)Cl	195.1
706	CO[C@H]1[C@@H](C[C@@H]2CN3CCC4=C([C@H]3C[C@@H]2[C@@H]1C(=O)OC)NC5=C4C=CC(=C5)OC)OC(=O)C6=CC(=C(C(=C6)OC)OC)OC	12.25
707	C1=CC(=C(C=C1C(F)(F)F)Cl)OC2=CC(=C(C=C2)[N+](=O)[O-])C(=O)O	0
708	C1=CC(=C(C=C1[N+](=O)[O-])Cl)NC(=O)C2=C(C=CC(=C2)Cl)O	12
709	CC(C)(C)C1=CC=C(C=C1)C(CCCN2CCC(CC2)C(C3=CC=CC=C3)(C4=CC=CC=C4)O)O	156.4
710	CC(=O)OC1=CC=CC=C1C(=O)O	8.57
711	CC1=C(C(=CC=C1)NC2=CC(=NC(=N2)SCC(=O)O)Cl)C	7.51
712	CCN(CC)C1=CC2=C(C=C1)C3(C4=C(O2)C=C(C=C4)N(CC)CC)C5=CC=CC=C5C(=O)O3	13.9
713	CCC1(C(=O)NC(=O)NC1=O)C2=CCCCCC2	29
714	CCN(CC)C1=CC2=C(C=C1)C=C(C(=O)O2)C(=O)O	11.55
715	CCOC(=O)C(C1=CC=C(C=C1)Cl)(C2=CC=C(C=C2)Cl)O	477
716	CCCCOCCOCCOCC1=CC2=C(C=C1CCC)OCO2	76.01
717	CCN(CC)CCNC(=O)C1=CC=C(C=C1)N	0.723
718	CCCCCCCCCCCCCOP(=O)(O)O	18.8
719	CCC1=CC=CC(=C1N(C(C)COC)C(=O)CCl)C	35.37
720	CN1C(=NC(=O)N(C1=O)C2CCCCC2)N(C)C	6.361
721	C1=CC=C(C=C1)NC2=C(C=C(C=C2)S(=O)(=O)NC3=CC=CC=C3)[N+](=O)[O-]	109.1
722	C1=CC(=C(C=C1[N+](=O)[O-])[N+](=O)[O-])O	0
723	CC(C)NCC(C1=CC(=C(C=C1)O)O)O.Cl	0
724	CC(C(=O)OC)OC1=CC=C(C=C1)OC2=C(C=C(C=C2)Cl)Cl	6.449
725	CN1[C@@H]2CC(C[C@H]1[C@H]3[C@@H]2O3)OC(=O)[C@H](CO)C4=CC=CC=C4	7.399
726	CC(C)NCC(COC1=CC=C(C=C1)CCOC)O	6.231
727	CC1=C(N=CN1)CSCCNC(=NC)NC#N	5.452
728	C1=C(C=C(C(=C1I)OC2=CC(=C(C(=C2)I)O)I)I)C[C@@H](C(=O)O)N	0
729	COC1=C(C=CC(=C1)N2C=NC3=C(C2=O)SC(=C3)C4=CC=C(C=C4)Cl)OCCN5CCCC5	0.4701
730	CCCC1=CC(=O)NC(=S)N1	1.323
731	CN1[C@@H]2CC[C@H]1CC(C2)OC(=O)C(CO)C3=CC=CC=C3	0.496
732	C1=CC=C(C=C1)NC(=O)NC2=CN=NS2	4.92
733	C1=CC(=CC=C1C2=CC(=O)C3=C(C=C(C=C3O2)O)O)O	138
734	C[C@]12CCC(=O)C[C@@H]1CC[C@@H]3[C@@H]2CC[C@]4([C@H]3CC[C@@H]4O)C	70.7
735	CCOC(=O)C(=C(C1=CC=CC=C1)C2=CC=CC=C2)C#N	161.3
736	CC1=C(SCCO1)C(=O)NC2=CC=CC=C2	24.41
737	C1=CC(=C(C(=C1C(=O)C2=CC(=C(C(=C2)O)O)O)O)O)O	28.1
738	C[C@]([C@H]1C[C@@]23CC[C@@]1([C@H]4[C@@]25CCN([C@@H]3CC6=C5C(=C(C=C6)O)O4)CC7CC7)OC)(C(C)(C)C)O	30.37
739	CC(C)C(CCCN(C)CCC1=CC(=C(C=C1)OC)OC)(C#N)C2=CC(=C(C=C2)OC)OC	12.7
740	C1C2=C(C=CC(=C2)N)C3=C1C=C(C=C3)N	61.66
741	CC(C)NCC(COC1=CC=CC2=CC=CC=C21)O	14.67
742	CC1(C(C1C(=O)OCC2=CC(=CC=C2)OC3=CC=CC=C3)C=C(Cl)Cl)C	68.4
743	CC1=C(C(=CC=C1)O)C	40.7
744	COP(=O)(C(C(Cl)(Cl)Cl)O)OC	31.7
745	CC1=CC(=C(C(=C1)C)O)C	163
746	C1CN2CCC1[C@H](C2)NC(=O)C3=CC4=C(C=C3)OCCO4	3.688
747	CC(C)(C(=O)NC1=CC(=C(C=C1)[N+](=O)[O-])C(F)(F)F)O	0
748	C1=CC=C(C(=C1)[N+](=O)[O-])[N+](=O)[O-]	24.2
749	C1CN(CCC1(C2=CC=C(C=C2)Cl)O)CCCC(=O)C3=CC=C(C=C3)F	5.062
750	C[C@]12CC(=O)[C@H]3[C@H]([C@@H]1CC[C@@]2(C(=O)CO)O)CCC4=CC(=O)C=C[C@]34C	0
751	C[C@]12CCC(=O)C=C1CC[C@@H]3[C@@H]2C(=O)C[C@]4([C@H]3CC[C@@]4(C(=O)CO)O)C	17.38
752	CC1=CC(=NC(=N1)NC2=CC=CC=C2)C	43.89
753	C[C@@H]1CC[C@H]2C[C@@H](/C(=C/C=C/C=C/[C@H](C[C@H](C(=O)[C@@H]([C@@H](/C(=C/[C@H](C(=O)C[C@H](OC(=O)[C@@H]3CCCCN3C(=O)C(=O)[C@@]1(O2)O)[C@H](C)C[C@@H]4CC[C@H]([C@@H](C4)OC)O)C)/C)O)OC)C)C)/C)OC	50.12
754	C[C@]12CC[C@H]3[C@H]([C@@H]1CCC2=O)CCC4=C3C=CC(=C4)O	0
755	CN(C)C(=O)C(CCN1CCC(CC1)(C2=CC=C(C=C2)Cl)O)(C3=CC=CC=C3)C4=CC=CC=C4	13.8
756	CN1CN(C(=S)SC1)C	12.42
757	CC1=CC(=CC(=C1O)[N+](=O)[O-])[N+](=O)[O-]	0
758	CC1=C(C2=C(N1C(=O)C3=CC=C(C=C3)Cl)C=CC(=C2)OC)CC(=O)O	9.35
759	CCCNCC(COC1=CC=CC=C1C(=O)CCC2=CC=CC=C2)O	38.94
760	C[Si]1(O[Si](O[Si](O[Si](O[Si](O1)(C)C)(C)C)(C)C)(C)C)C	0
761	CN1CCC[C@H]1C2=CN=CC=C2	4.44
762	C1=CC(=CC(=C1)Cl)Cl	200
763	C1=COC(=C1)CNC2=CC(=C(C=C2C(=O)O)S(=O)(=O)N)Cl	0
764	CCC1=CC=CC2=C1OC(=C2)C(CNC(C)(C)C)O	15.8
765	CCOP(=S)(OCC)OC(C(Cl)(Cl)Cl)Cl	617
766	C1=CC(=CC=C1C(=O)N[C@@H](CCC(=O)O)C(=O)O)NCC2=CN=C3C(=N2)C(=NC(=N3)N)N	0
767	CC(=O)CCC1=CC=C(C=C1)O	29.1
768	C1=CN=CC=C1C(=O)NN	1.11
769	CN(C)C1=CC=C(C=C1)C(=C2C=CC(=[N+](C)C)C=C2)C3=CC=C(C=C3)N(C)C.[Cl-]	8.322
770	CNCCC(C1=CC=CC=C1)OC2=CC=C(C=C2)C(F)(F)F	1
771	CCCSC1=CC2=C(C=C1)N=C(N2)NC(=O)OC	12.59
772	CC/C(=C(\C1=CC=CC=C1)/C2=CC=C(C=C2)OCCN(C)C)/C3=CC=CC=C3.C(C(=O)O)C(CC(=O)O)(C(=O)O)O	0
773	C1CN(CC2=C1SC=C2)CC3=CC=CC=C3Cl	56.23
774	CC(C)(C)C(C(N1C=NC=N1)OC2=CC=C(C=C2)Cl)O	0
775	C1CCC(CC1)C(=O)N2CC3C4=CC=CC=C4CCN3C(=O)C2	17.38
776	CCN(CC(=C)C)C1=C(C=C(C=C1[N+](=O)[O-])C(F)(F)F)[N+](=O)[O-]	3.026
777	CCCCN(CCCC)SN(C)C(=O)OC1=CC=CC2=C1OC(C2)(C)C	26.74
778	C1=CN=CC=C1C2=CC=NC=C2	0
779	C1=C(C(=NC(=C1Cl)Cl)OCC(=O)O)Cl	0
780	CC1=C(C=CC(=C1)OP(=S)(OC)OC)SC	87.2
781	CCCCNC(=O)OCC#CI	486
782	CC(=O)C[C@@H](C1=CC=CC=C1)C2=C(C3=CC=CC=C3OC2=O)O	1.051
783	CS(=O)(=O)OCCCCOS(=O)(=O)C	1.39
784	COP(=S)(OC)OC1=NC(=C(C=C1Cl)Cl)Cl	24.1
785	CCOP(=O)(OCC)OC1=NC(=C(C=C1Cl)Cl)Cl	43.3
786	CC1=C(C(C(=C(N1)C)C(=O)OCCN(C)CC2=CC=CC=C2)C3=CC(=CC=C3)[N+](=O)[O-])C(=O)OC	402
787	CC1=CC(=O)NC(=S)N1	0
788	C(Cl)(Cl)(Cl)Cl	4.281
789	CC1(C(=O)NC(=O)N(C1=O)C)C2=CCCCC2	0
790	CCOP(=S)(OCC)SCSP(=S)(OCC)OCC	10.41
791	CCOP(=S)(OCC)OC1=CC=C(C=C1)[N+](=O)[O-]	6.65
792	CC/C(=C(/CC)\C1=CC=C(C=C1)O)/C2=CC=C(C=C2)O	39.5
793	COC1=CC2=C(C=CN=C2C=C1)[C@@H]([C@H]3C[C@@H]4CCN3C[C@@H]4C=C)O	6.62
794	C1=CC=C2C(=C1)C=CC3=CC4=CC=CC=C4C=C32	18.27
795	CCOP(=S)(OCC)OC1=CC2=C(C=C1)C(=C(C(=O)O2)Cl)C	31.7
796	C1=CC(=CC=C1[C@H]([C@@H](CO)NC(=O)C(Cl)Cl)O)[N+](=O)[O-]	0.723
797	CC(=O)O.CC(=O)O.C1=CC(=CC=C1N/C(=N/C(=NCCCCCCN=C(/N=C(/NC2=CC=C(C=C2)Cl)\N)N)N)/N)Cl	0
798	COC1=CC=C(C=C1)C(=C(C2=CC=C(C=C2)OC)Cl)C3=CC=C(C=C3)OC	0
799	C1=CC(=N)C=CC1=C(C2=CC=C(C=C2)N)C3=CC=C(C=C3)N.Cl	3.23
800	C1CN2CC3=CCO[C@H]4CC(=O)N5[C@H]6[C@H]4[C@H]3C[C@H]2[C@@]61C7=CC=CC=C75	2
801	CCOC1=CC2=C(C=C1)N=C3C=CC(=O)C=C3O2	150
802	CN1CC[C@]23[C@@H]4[C@H]1CC5=C2C(=C(C=C5)O)O[C@H]3[C@H](C=C4)O	24
803	CCC1(C(=O)NC(=NC1=O)[O-])C2=CC=CC=C2.[Na+]	0
804	C1=CC=C(C=C1)C2(C(=O)NC(=O)N2)C3=CC=CC=C3	0.8178
805	CCC1(C(=O)NC(=O)NC1=O)CCC(C)C	0
806	C[C@@]12CCN([C@@H]1N(C3=C2C=C(C=C3)OC(=O)NC)C)C	1.64
807	C1=CC2=C(C=C1O)OC(=O)C=C2C(F)(F)F	42.89
808	CC1=C(C(=CC=C1)C)O	20.52
809	C[C@]12CC[C@H]3[C@H]([C@@H]1CC[C@]2(C#C)O)CCC4=C3C=CC(=C4)O	0
810	CC1=CC(=NC(=N1)NS(=O)(=O)C2=CC=C(C=C2)N)C	0
811	CCCCC(CC)COC(=O)CC(C(=O)OCC(CC)CCCC)S(=O)(=O)[O-].[Na+]	49.8
812	C1=CC(=NC(=C1Cl)C(=O)O)Cl.C(CO)N	0
813	C1CN(CCC1N2C3=C(C=C(C=C3)Cl)NC2=O)CCCN4C5=CC=CC=C5NC4=O	19.08
814	CC(=O)[C@H]1CC[C@@H]2[C@@]1(CC[C@H]3[C@H]2CCC4=CC(=O)CC[C@]34C)C	33.7
815	CC1=C(C(=CC=C1)C)N(C(C)C(=O)OC)C(=O)COC	1.58
816	CCC(=O)O[C@H]1CC[C@@H]2[C@@]1(CC[C@H]3[C@H]2CCC4=CC(=O)CC[C@]34C)C	427
817	CN1CCN(CC1)C2=NC3=C(C=CC(=C3)Cl)NC4=CC=CC=C42	8.567
818	C[C@]12CC[C@H]3[C@H]([C@@H]1CC[C@H]2O)CCC4=C3C=CC(=C4)O	55.6
819	CCC1=C(C(=CC=C1)CC)N	16.13
820	CCNC(=O)NC(=O)/C(=N/OC)/C#N	32.8
821	CC1=C2C=CC3=CC=CC=C3C2=C(C4=CC=CC=C14)C	3.226
822	CN1C=NC2=C1C(=O)N(C(=O)N2C)C	0.2855
823	CCN(CC)C1=CC(=C(C=C1)C(=O)C2=CC=CC=C2C(=O)O)O	2
824	CCC1=C(C(=NC(=N1)N)N)C2=CC=C(C=C2)Cl	2.768
825	CC1=C(C(=O)N(N1C)C2=CC=CC=C2)N(C)C	4.1
826	C[C@]12CCC(=O)C=C1CC[C@@H]3[C@@H]2CC[C@]4([C@H]3CC[C@]4(C)O)C	12.7
827	C[C@]12CC[C@H]3[C@H]([C@@H]1CC[C@@H]2O)CCC4=CC(=O)CC[C@]34C	28.83
828	CN=C1CN(C(=C2C=C(C=CC2=N1)Cl)C3=CC=CC=C3)O	8
829	CC1=NN(C(=C1C2=CC=CC=C2)N)C3=CC=CC=C3	32.36
830	C1=CC=C2C(=C1)NC(=S)N2	0
831	CN1CCN(CC1)CCCN2C3=CC=CC=C3SC4=C2C=C(C=C4)Cl	5.452
832	CN(C)CCCN1C2=CC=CC=C2SC3=CC=CC=C31	22.59
833	CC1=C(C(=O)CC1OC(=O)C2C(C2(C)C)C=C(C)C)CC=C	2.588
834	CC(C)(C)C1=CC(=CC=C1)O	40.2
835	CN1C2=C(C(=O)N(C1=O)C)NC=N2	0.7788
836	CC1=C(C=C(C=C1)C(=O)NC)N2C(=CC(=C(C2=O)Br)OCC3=C(C=C(C=C3)F)F)C	3
837	CN(C)CCOC(C1=CC=CC=C1)C2=CC=CC=C2	5.841
838	C1=CC=C(C=C1)NC(=O)CCl	38.9
840	C1=C(C(=C(C(=C1Cl)Cl)Cl)O)Cl	0
841	C1NC2=CC(=C(C=C2S(=O)(=O)N1)S(=O)(=O)N)Cl	0
842	CC1=C(C(=O)N(C(=O)N1)C(C)(C)C)Cl	2.272
843	CN(CC1=CN=C2C(=N1)C(=NC(=N2)N)N)C3=CC=C(C=C3)C(=O)N[C@@H](CCC(=O)O)C(=O)O	0
844	CCCCCCCCCCCCN1CCCCCC1=O	9.8
845	C1=CC(=CC=C1C(=O)N[C@@H](CCC(=O)O)C(=O)O)NCC2=CN=C3C(=N2)C(=O)NC(=N3)N	0
846	C1=CC=C2C(=C1)N=CC(=N2)NS(=O)(=O)C3=CC=C(C=C3)N	0
847	CC1=NC=C2N1C3=C(C=C(C=C3)Cl)C(=NC2)C4=CC=CC=C4F	12.1
848	CC1=C(C=CC(=C1)O)Cl	0
849	C/C(=N\OC(=O)N(SN(C(=O)O/N=C(/SC)\C)C)C)/SC	839
850	C1=CC(=CN=C1)C(=O)O	3.54
851	CC(C)C1N(CCO1)CCOC(=O)NCCCCCCNC(=O)OCCN2CCOC2C(C)C	0.5757
852	CC(C)N1CCC(CC1)N(C2=CC=C(C=C2)Cl)C(=O)CC3=CC=CC=C3	34.66
853	CN1C=C(C(=O)C(=C1)C2=CC(=CC=C2)C(F)(F)F)C3=CC=CC=C3	5.594
854	CN1C(=C(C2=C(S1(=O)=O)C=CS2)O)C(=O)NC3=CC=CC=N3	1.869
855	CC[C@H]1C(=O)N(CC(=O)N([C@H](C(=O)N[C@H](C(=O)N([C@H](C(=O)N[C@H](C(=O)N[C@@H](C(=O)N([C@H](C(=O)N([C@H](C(=O)N([C@H](C(=O)N([C@H](C(=O)N1)[C@@H]([C@H](C)C/C=C/C)O)C)C(C)C)C)CC(C)C)C)CC(C)C)C)C)C)CC(C)C)C)C(C)C)CC(C)C)C)C	8.591
856	C1=C(OC(=C1)[N+](=O)[O-])/C=N/NC(=O)N	0
857	CC(C)(C1=CC=CC=C1)C2=CC=C(C=C2)O	27.2
858	C1=CC=NC(=C1)NS(=O)(=O)C2=CC=C(C=C2)N=NC3=CC(=C(C=C3)O)C(=O)O	5.16
859	C1=CC=C(C=C1)N=NC2=CC=C(C=C2)N	15.7
860	C1=CC=C(C(=C1)C(C2=CC=C(C=C2)Cl)(C3=CN=CN=C3)O)Cl	3.788
861	CCCC1COC(O1)(CN2C=NC=N2)C3=C(C=C(C=C3)Cl)Cl	17
862	C=CC(=O)NC1=CC=C(C=C1)F	3
863	C1=CC=C(C=C1)C2=NC(C(=O)NC3=C2C=C(C=C3)Cl)O	3.271
864	CNC(=O)CSP(=S)(OC)OC	3.682
865	C[C@@]1([C@H]2C[C@H]3[C@@H](C(=O)C(=C([C@]3(C(=O)C2=C(C4=C1C=CC=C4O)O)O)O)C(=O)N)N(C)C)O	0
866	C1CNP(=O)(OC1)N(CCCl)CCCl.O	0
867	CN1C=CNC1=S	0
868	C1[C@@H]2[C@H]3[C@@H]([C@H]1[C@H]4[C@@H]2O4)[C@]5(C(=C([C@@]3(C5(Cl)Cl)Cl)Cl)Cl)Cl	4.262
869	CC1=C(C=CC=C1[N+](=O)[O-])[N+](=O)[O-]	34.64
870	C1C2=CC=CC=C2C3=C1C=C(C=C3)[N+](=O)[O-]	9.537
871	CC1=CC(=O)N(N1C)C2=CC=CC=C2	0.5062
873	CC(CN1C2=CC=CC=C2SC3=CC=CC=C31)N(C)C	41.28
874	C1=C(C(=C(C(=C1Cl)Cl)Cl)Cl)Cl	16.4
875	CC1=C(C=CC(=C1)C2=CC(=C(C=C2)N)C)N.Cl.Cl	25.4
876	C[C@@]1([C@H]2[C@@H]([C@H]3[C@@H](C(=O)C(=C([C@]3(C(=O)C2=C(C4=C1C=CC=C4O)O)O)O)C(=O)N)N(C)C)O)O.O.O	0
877	CN(C)C1=CC2=C(C=C1)N=C3C=CC(=[N+](C)C)C=C3S2.[Cl-]	13.9
878	CC(C)C1=CC(=CC=C1)O	19.9
879	CC(C)NC1=NC(=NC(=N1)N)Cl	0
880	C1=CC(=CC=C1CC2=CC=C(C=C2)O)O	25.5
881	CCOC1=CC=C(C=C1)NC(=O)C	9.346
882	CS(=O)(=O)C1=C(C=C(C=C1)[C@@H](C[C@H]2CCC(=O)C2)C(=O)NC3=NC=CN=C3)Cl	6.26
883	C[C@H](CS)C(=O)N1CCC[C@H]1C(=O)O	57.11
884	CCCCCCOC(=O)C1=CC=CC=C1O	191.4
885	[Na+].CC1C(=CC(Br)=C([O-])C=1Br)C1(C2=CC(Br)=C(O)C(Br)=C2C)C2=CC=CC=C2OS1(=O)=O	0
886	C1=C(C=C(C=C1Br)Br)Br	0
887	C1=C(C=C(C=C1Cl)Cl)N	86.1
888	COP(=O)(OC)OC=C(Cl)Cl	86.4
889	CCN1CCN(C(=O)C1=O)C(=O)N[C@H](C2=CC=C(C=C2)O)C(=O)N[C@H]3[C@@H]4N(C3=O)C(=C(CS4)CSC5=NN=NN5C)C(=O)O	3
890	CCN(CC1=C(C=CC=C1Cl)F)C2=C(C=C(C=C2[N+](=O)[O-])C(F)(F)F)[N+](=O)[O-]	0
891	CC(C)OC(=O)C1=CN(CC(C2=C1NC3=CC=CC=C32)(C)C)C(=O)C4=CC(=C(C=C4)F)F	14.19
892	CCCCCC(=O)O[C@@]1(CC[C@@H]2[C@@]1(CC[C@H]3[C@H]2CCC4=CC(=O)CC[C@]34C)C)C(=O)C	195
893	C[C@]12CCC(=O)C=C1CC[C@@H]3[C@@H]2CC[C@]4([C@H]3CCC4=O)C	25.92
894	CNC(=O)OC1=CC=CC2=CC=CC=C21	27.27
895	C1C2=C(C=C(C=C2)O)C3=CC=CC=C31	20.56
896	CCCCCCCCCC[N+](C)(C)CC1=CC=CC=C1.[Cl-]	63.1
897	C1=CC=C2C=C(C=CC2=C1)OC(=O)C3=CC=CC=C3N	846
898	C1=CC(=C(C(=C1Cl)Cl)Cl)Cl	32.4
899	CC1(C(=O)N(C(=O)N1)C2=CC(=C(C=C2)[N+](=O)[O-])C(F)(F)F)C	0
900	CC(C)NCC(COC1=CC=C(C=C1)CCOCC2CC2)O	2.142
901	CC1=C(C(C(=C(N1)C)C(=O)OCC(C)C)C2=CC=CC=C2[N+](=O)[O-])C(=O)OC	0
902	CCOC(=O)C(C)(C)OC1=CC=C(C=C1)Cl	868
903	CCOC(C)(C)C	3.027
904	C1C[N+]2=CC=CC=C2C3=CC=CC=[N+]31.O.[Br-].[Br-]	0
905	CC1=CC(=NN1)NC2=CC(=NC(=N2)SC3=CC=C(C=C3)NC(=O)C4CC4)N5CCN(CC5)C	29
906	CN(CCCC(=O)C1=CN=CC=C1)N=O	4.538
907	C1=CC=C(C(=C1)CC(=O)O)NC2=C(C=C(C=C2Cl)O)Cl	0.0066
908	CCO	19.98
909	C1COCCN1CCOCCN2CCOCC2	2.573
910	CN(C)CCCOC1=NN(C2=CC=CC=C21)CC3=CC=CC=C3	9
911	CC(C)NCC(COC1=CC=CC=C1OCC=C)O	4.283
912	CCCCOCCOC(=O)COC1=NC(=C(C=C1Cl)Cl)Cl	858
913	CC(C)COCC(CN(CC1=CC=CC=C1)C2=CC=CC=C2)N3CCCC3	2
914	CCCCNC(=O)NS(=O)(=O)C1=CC=C(C=C1)C	1.324
915	CC(=O)N[C@H]1CCC2=CC(=C(C(=C2C3=CC=C(C(=O)C=C13)OC)OC)OC)OC	0.698
916	CCOC1=CC2=CC=CC=C2OC1=O	26
917	CC1=NC=C(C(=C1O)CO)CO	0
918	CC(=O)N1CCN(CC1)C2=CC=C(C=C2)OC[C@H]3CO[C@](O3)(CN4C=CN=C4)C5=C(C=C(C=C5)Cl)Cl	55
919	C1=CC=C(C=C1)[C@H](CNC2=CC=C(C=C2)CCNC[C@@H](C3=CC(=C(C=C3)O)NC=O)O)O	3
920	CC[C@]12CC[C@H]3[C@H]([C@@H]1CC[C@]2(C#C)O)CCC4=CC(=O)CC[C@H]34	10.445
921	C1=CC(=C(C=C1O)O)C2=C(C(=O)C3=C(C=C(C=C3O2)O)O)O.O	0
922	C1CC1NC2=NC(=NC(=N2)N)N	0
923	CC(C)[C@@H](C1=CC=C(C=C1)Cl)C(=O)O[C@H](C#N)C2=CC(=CC=C2)OC3=CC=CC=C3	0
924	CC(C)OC1=CC=CC(=C1)NC(=O)C2=CC=CC=C2C(F)(F)F	14.17
925	CN/C(=C\[N+](=O)[O-])/NCCSCC1=CC=C(O1)CN(C)C	1.324
926	CCOC(=O)C(C)OC1=CC=C(C=C1)OC2=NC3=C(O2)C=C(C=C3)Cl	54.93
927	CC(C)NCC(COC1=CC=C(C=C1)COCCOC(C)C)O	1.6
928	C[C@H]1C[C@@H](C(=O)[C@@H](C1)[C@@H](CC2CC(=O)NC(=O)C2)O)C	1.74
929	CN1CCN(CC1)C(=O)C2=CC3=C(N2)SC(=C3)Cl	5.351
930	C1C(=O)NC(=O)N1/N=C/C2=CC=C(O2)[N+](=O)[O-]	0
931	C[C@H](CC1=CC=C(C=C1)OC)NC[C@@H](C2=CC(=C(C=C2)O)NC=O)O	3.91
932	CC1(CN=C(NC1)NN=C(/C=C/C2=CC=C(C=C2)C(F)(F)F)/C=C/C3=CC=C(C=C3)C(F)(F)F)C	4.38
933	CO	0.8866
934	CC(C)[C@H](C1=CC=C(C=C1)Cl)C(=O)O[C@@H](C#N)C2=CC(=CC=C2)OC3=CC=CC=C3	0.766
935	CC(C)O	1.102
936	C(Cl)(Cl)Cl	46.47
937	CCCN(CCOC1=C(C=C(C=C1Cl)Cl)Cl)C(=O)N2C=CN=C2	16.4
938	C[C@]12CCCC([C@@H]1CC[C@@]3([C@@H]2CCO3)C)(C)C	2.254
939	C1=CC=C(C=C1)NC(=O)NC2=CC(=NC=C2)Cl	26.87
940	C[C@]12CC[C@H]3[C@H]([C@@H]1CC[C@]2(C#C)O)CCC4=CC(=O)CC[C@H]34	0
941	CC1(C(C1C(=O)OC(C#N)C2=CC(=C(C=C2)F)OC3=CC=CC=C3)C=C(Cl)Cl)C	23.8
942	CC1([C@@H](N2[C@H](S1(=O)=O)CC2=O)C(=O)O)C	3
943	CC/C(=C(\C1=CC=C(C=C1)O)/C2=CC=C(C=C2)OCCN(C)C)/C3=CC=CC=C3	16
944	CC(C)C(C(C)(C)COC(=O)C(C)C)OC(=O)C(C)C	9.95
945	CCCOCC(=NC1=C(C=C(C=C1)Cl)C(F)(F)F)N2C=CN=C2	19.6
946	C1CN(CCN1)S(=O)(=O)C2=C(C=CC(=C2O)NC(=O)NC3=C(C(=CC=C3)F)Cl)Cl	3
947	CN(C)CCCN1C2=CC=CC=C2SC3=C1C=C(C=C3)Cl.Cl	5.43
948	C/C(=C\C(=O)NC)/OP(=O)(OC)OC	1.49
949	C1CN(CCN1CCCN2C3=CC=CC=C3SC4=C2C=C(C=C4)C(F)(F)F)CCO	7.399
950	CC(C)N1C(=NC(C)(C)C)SCN(C1=O)C2=CC=CC=C2	18.47
951	C(C(=O)O)OC1=NC(=C(C(=C1Cl)N)Cl)F	1.791
952	C1C[C@@H](O[C@@H]1CO)N2C=NC3=C2N=CNC3=O	0
953	C1=CN(C(=O)N=C1N)[C@H]2[C@H]([C@@H]([C@H](O2)CO)O)O.Cl	16.8
954	CC(C(=O)OC)OC1=CC=C(C=C1)OC2=C(C=C(C=N2)C(F)(F)F)Cl	467
955	CCCCOC(=O)C(C)OC1=CC=C(C=C1)OC2=NC=C(C=C2)C(F)(F)F	401
956	C1=C(C(=C(C(=C1Cl)Cl)CC2=C(C(=CC(=C2Cl)Cl)Cl)O)O)Cl	0
957	CCNC(=O)OC1CCN(CC1)C2=NN=CC3=CC(=C(C=C32)OC)OC	64.57
958	CC[C@@]1(C(=O)N(C(=O)N1)C)C2=CC=CC=C2	1.4
959	CCC(=O)NC1=CC(=C(C=C1)Cl)Cl	11.3
960	CCC(=O)N(C1=CC=CC=C1)C2(CCN(CC2)CCN3C(=O)N(N=N3)CC)COC	0
961	CCOC(=O)[C@@H](C)OC1=CC=C(C=C1)OC2=NC3=C(O2)C=C(C=C3)Cl	519
962	C1COCCN1CCNC(=O)C2=CC=C(C=C2)Cl	3
963	C1=CC=CC=C1	3.34
964	CC(Cl)(Cl)Cl	0.1203
965	CCCCCCCCCC[N+](C)(C)CCCCCCCCCC.[Cl-]	18.65
967	C1=CC(=CC=C1N)S(=O)(=O)NC2=NC=CS2	0
968	CS(=O)(=O)NC(=O)C1=C(C=CC(=C1)OC2=C(C=C(C=C2)C(F)(F)F)Cl)[N+](=O)[O-]	0
969	C1[C@@H]2[C@@H]3[C@H]([C@H]1[C@H]4[C@@H]2O4)[C@@]5(C(=C([C@]3(C5(Cl)Cl)Cl)Cl)Cl)Cl	0
970	COC1=CC=C(C=C1)C(C2=CC=C(C=C2)OC)C(Cl)(Cl)Cl	12.5
971	COC[C@@H](CN1C(=O)C=NN(C1=O)C2=CC(=C(C=C2)Cl)C(=O)NCC3(CCCCCC3)O)O	3
972	CCOC(=O)NCCOC1=CC=C(C=C1)OC2=CC=CC=C2	23.1
973	CCOC(=O)C1=C(NC(=C(C1C2=C(C(=CC=C2)Cl)Cl)C(=O)OC)C)C	0
974	C1=CC(=CC=C1C(C2=CC=C(C=C2)Cl)C(Cl)Cl)Cl	0
975	C1=CC(=CC=C1C(=C(Cl)Cl)C2=CC=C(C=C2)Cl)Cl	199
976	C[C@]12OC3=C(C1=O)C1=C(C(=O)C(NC(=O)C(C)=CC=C[C@H](C)[C@H](O)[C@@H](C)[C@@H](O)[C@@H](C)[C@H](OC(C)=O)[C@H](C)[C@H](C=CO2)OC)=C2NC4(CCN(CC(C)C)CC4)N=C21)C(O)=C3C	0
977	C1=CC=C(C(=C1)N)NC(=O)C2=CC=C(C=C2)CNC3=NC=CC(=N3)C4=CN=CC=C4	7.5
978	CNCCC=C1C2=CC=CC=C2CCC3=CC=CC=C31	9.87e-06
979	C1C[N+]2(CCC1[C@H](C2)OC(=O)C(C3=CC=CS3)(C4=CC=CS4)O)CCCOC5=CC=CC=C5	64
980	CC1=NC2=C(C=C1)C(=CC(=C2O)Cl)Cl	9.844
981	CC(C)NC1=NC(=NC(=N1)SC)NC(C)C	35.78
982	COC1=CC=CC=C1OCCNCC(COC2=CC=CC3=C2C4=CC=CC=C4N3)O	98.52
983	COP(=S)(OC)SCN1C(=O)C2=CC=CC=C2C1=O	23.82
984	CC(C)(C)C1=CC(=C(C(=C1)C(C)(C)C)O)C(C)(C)C	40.7
985	CC(=O)NCCC1=CNC2=C1C=C(C=C2)OC	0
986	CC1=CN=C(C(=C1OC)C)CS(=O)C2=NC3=C(N2)C=C(C=C3)OC	3.271
987	CCCCCCCCN(C)C	35.14
988	CC(CN1C2=CC=CC=C2CCC3=CC=CC=C31)CN(C)C	58.41
989	C1CN(CCC1C(=O)C2=CC=C(C=C2)F)CCN3C(=O)C4=CC=CC=C4NC3=O	52.96
990	CCC/C(=N\OCC)/C1=C(CC(CC1=O)CC(C)SCC)O	11.87
991	C1=CC=C(C(=C1)C2=NN=C(N=N2)C3=CC=CC=C3Cl)Cl	0
992	CC(C)OP(=S)(OC(C)C)SCCNS(=O)(=O)C1=CC=CC=C1	250.3
993	CC1=NC(=NC(=N1)OC)NC(=O)NS(=O)(=O)C2=CC=CC=C2C(=O)OC	2.319
994	CC	150
995	C1CC1(C2=CC(=C(C=C2)C3=CC(=C(C=C3)Cl)Cl)F)C(=O)O	38.9
996	C=CCl	147.3
997	C(Cl)Cl	13.72
998	CC[C@H](C)C(=O)O[C@H]1C[C@H](C=C2[C@H]1[C@H]([C@H](C=C2)C)CC[C@@H]3C[C@H](CC(=O)O3)O)C	0
999	C=C(Cl)Cl	123.5
1000	CC1=NC(=C(C(=N1)Cl)NC2=NCCN2)OC	3
1001	C(C(C(C(C(F)(F)S(=O)(=O)N)(F)F)(F)F)(F)F)(C(C(C(F)(F)F)(F)F)(F)F)(F)F	11.93
1002	CC1=C(C(C(=C(N1)C#N)C(=O)OC)C2=CC(=CC=C2)[N+](=O)[O-])C(=O)OC(C)C	2160
1003	C[As](=O)(C)O	0.1976
1004	C(F)(F)(F)Br	5.048
1005	CC1=C(C(C(=C(N1)C)C(=O)OC(C)C)C2=CC=CC3=NON=C32)C(=O)OC	18
1006	CC1=C(C=NO1)C(=O)NC2=CC=C(C=C2)C(F)(F)F	3
1007	C(F)(F)(Cl)Cl	0.2524
1008	CC1=CC2=C(C=C1C)N(C(=N2)NCCCO)CC(=O)C3=CC(=C(C(=C3)C(C)(C)C)O)C(C)(C)C	0.8591
1009	CCCN(CCC)C(=O)SCC	80.36
1010	C(C(F)(Cl)Cl)(F)(F)Cl	0.2524
1011	CNC(=O)C1=CC=CC=C1NC2=NC(=NC=C2Cl)NC3=C(C=C(C=C3)N4CCOCC4)OC	16.22
1012	C1=CC(C2C1C3(C(=C(C2(C3(Cl)Cl)Cl)Cl)Cl)Cl)Cl	4.574
1013	CNC[C@@H](CC12CCC(C3=CC=CC=C31)C4=CC=CC=C24)O	3.037
1014	CN1CC[C@]23[C@@H]4[C@H]1CC5=C2C(=C(C=C5)OC)O[C@H]3[C@H](C=C4)O	24.53
1015	CCOC(=O)C(C)OC1=CC=C(C=C1)OC2=CN=C3C=C(C=CC3=N2)Cl	35.3
1016	CC(C)(C)[C@H]([C@@H](CC1=CC=C(C=C1)Cl)N2C=NC=N2)O	7.14
1017	CCCC(C)C1(C(=O)NC(=O)NC1=O)CC	0.723
1018	C1CCC(CC1)(CN)C2=CC=CS2	1.069
1019	C1=C(N=C(S1)N=C(N)N)CSCC/C(=N/S(=O)(=O)N)/N	0
1020	C1=CC=C(C=C1)[Sn](C2=CC=CC=C2)C3=CC=CC=C3.O	7.749
1021	CN1C(=NC(=N1)CO)NCCCOC2=CC=CC(=C2)CN3CCCCC3	11
1022	CC(=CC1C(C1(C)C)C(=O)OCN2C(=O)C3=C(C2=O)CCCC3)C	37.6
1023	CC(C)(C)C1=CC=C(C=C1)N	10.7
1024	CCC(=O)C(CC(C)N(C)C)(C1=CC=CC=C1)C2=CC=CC=C2	0
1025	C[C@@]12[C@H](C=C[C@@]3([C@@H]1[C@@H]([C@]45[C@H]3CC[C@](C4)(C(=C)C5)O)C(=O)O)OC2=O)O	0
1026	C1=CC=C2C(=C1)C(=O)OC2(C3=CC=C(C=C3)O)C4=CC=C(C=C4)O	47.4
1027	CCCCC1(C(=O)NC(=O)NC1=O)CC	1.9
1028	C1=CC2=C(C(=C(C=C2Cl)Cl)O)N=C1	5.798
1029	CCC(C)(C1=CC=C(C=C1)O)C2=CC=C(C=C2)O	35.66
1030	C1(=C(C(C(=C1Cl)Cl)(Cl)Cl)Cl)Cl	0
1031	CCOC(=O)C(C)OC(=O)C1=C(C=CC(=C1)OC2=C(C=C(C=C2)C(F)(F)F)Cl)[N+](=O)[O-]	1.28
1033	CC1=CC=C(C=C1)NC(=O)C=C	21.38
1034	COC1=CC=C(C=C1)NC(=O)C=C	10.72
1035	C/C(=C\C(=O)OC)/OP(=O)(OC)OC	4.7
1036	CCCCOC(=O)CC(CC(=O)OCCCC)(C(=O)OCCCC)OC(=O)C	261
1037	C1[C@@H]([C@H](C(=O)O1)CC2=CC(=CC=C2)O)CC3=CC(=CC=C3)O	139
1038	CCCCSP(=O)(SCCCC)SCCCC	125.1
1039	C[C@H]1[C@@H](SC(=O)N1C(=O)NC2CCCCC2)C3=CC=C(C=C3)Cl	110.4
1040	CC1=CC(=O)CC(C1)(C)C	18.7
1041	CCOC(=O)C1=C2CN(C(=O)C3=C(N2C=N1)C=CC(=C3)F)C	6.231
1042	CC(CCl)Cl	57.19
1043	C1=CC=C(C(=C1)C(C2=CC=C(C=C2)Cl)C(Cl)(Cl)Cl)Cl	15.3
1044	CCC(=O)C	50.86
1045	C(=C(Cl)Cl)Cl	10.98
1046	C1=CC=C(C=C1)P(=O)(C2=CC=CC=C2)C3=CC=CC=C3	0
1047	CCCCOC(=O)[C@@H](C)OC1=CC=C(C=C1)OC2=NC=C(C=C2)C(F)(F)F	234.4
1048	COC1=C(C=C(C=C1)CCO[C@@H]2CCCC[C@H]2N3CC[C@H](C3)O)OC	6.46
1049	CC1=C(C(=C(C(=C1F)F)COC(=O)[C@H]2[C@H](C2(C)C)/C=C(/C(F)(F)F)\Cl)F)F	24.81
1050	C1=C(C=NC(=C1Cl)NC2=C(C=C(C(=C2[N+](=O)[O-])Cl)C(F)(F)F)[N+](=O)[O-])C(F)(F)F	24.76
1051	CCC(C)(C)C1=CC(=C(C=C1O)C(C)(C)CC)O	11.4
1053	CCOC(=O)N1CCC(=C2C3=C(CCC4=C2N=CC=C4)C=C(C=C3)Cl)CC1	33.9
1054	CCC(C)(C)C(=O)O[C@H]1C[C@H](C=C2[C@H]1[C@H]([C@H](C=C2)C)CC[C@@H]3C[C@H](CC(=O)O3)O)C	24.3
1055	CC(C)(C1=CC(=C(C(=C1)Br)O)Br)C2=CC(=C(C(=C2)Br)O)Br	50.5
1056	CC(C)(C1=CC(=C(C(=C1)Cl)O)Cl)C2=CC(=C(C(=C2)Cl)O)Cl	18.7
1057	CC1=C(C=CC(=C1)C(C)(C)C2=CC(=C(C=C2)O)C)O	191
1058	CCCCC(CN1C=NC=N1)(C2=C(C=C(C=C2)Cl)Cl)O	16.22
1059	CC(C)(C1=CC=C(C=C1)O)C2=CC=C(C=C2)O	19.9
1060	C1=CC(=CC=C1N)S(=O)(=O)C2=CC=C(C=C2)N	0
1061	C1=CC(=CC=C1O)S(=O)(=O)C2=CC=C(C=C2)O	0
1062	CC1=CC(=CC2=C(C(=CN=C12)C(=O)N)NC3=CC(=CC=C3)OC)S(=O)(=O)C4=CC=CC(=C4)C(=O)N(C)C	20.05
1063	CCC(C)(C)C1=CC=C(C=C1)O	20.96
1064	C1=CC=C2C(=C1)C(=O)NS2(=O)=O	1.917
1065	CC[C@H](C)C(=O)O[C@H]1C[C@@H](C=C2[C@H]1[C@H]([C@H](C=C2)C)CC[C@H](C[C@H](CC(=O)O)O)O)O	3
1066	CC[C@H](C)C(=O)O[C@H]1C[C@@H](C=C2[C@H]1[C@H]([C@H](C=C2)C)CC[C@H](C[C@H](CC(=O)[O-])O)O)O.[Na+]	0
1067	C(C(F)(F)F)F	0.101
1068	CC(C)C1(C(=O)NC(=N1)C2=C(C=CC=N2)C(=O)O)C	0.3874
1069	CC(C)C1(C(=O)NC(=N1)C2=NC3=CC=CC=C3C=C2C(=O)O)C	2.457
1070	CCC1=CC(=C(N=C1)C2=NC(C(=O)N2)(C)C(C)C)C(=O)O	2.351
1071	CCCCCCC(C)OC(=O)COC1=NC(=C(C(=C1Cl)N)Cl)F	9.915
1072	CCCCCCCCCCCCCC[P+](CCCC)(CCCC)CCCC.[Cl-]	16.7
1073	CC1(CON(C1=O)CC2=CC=CC=C2Cl)C	3.038
1074	CC(=O)CC(C1=CC=CC=C1)C2=C(C3=CC=CC=C3OC2=O)O	0
1075	C1=CC=C(C(=C1)C(C2=CC=C(C=C2)O)C3=CC=C(C=C3)O)C(=O)O	1.85
1076	CC1=NC(=NC(=N1)OC)NC(=O)NS(=O)(=O)C2=CC=CC=C2OCCCl	14.58
1077	C1=CC=C2C(=C1)C(=O)[N-]S2(=O)=O.O.[Na+]	0
1078	C1=CC(=CC=C1[N+](=O)[O-])[O-].[Na+]	48.1
1079	CCC(C)(CC)C1=NOC(=C1)NC(=O)C2=C(C=CC=C2OC)OC	17.7
1080	CC1=CC=C(C=C1)C2=C(N3C=C(C=CC3=N2)C)CC(=O)N(C)C	3.271
1081	C1CCN(CC1)CCOC2=CC=C(C=C2)C(=O)C3=C(SC4=C3C=CC(=C4)O)C5=CC=C(C=C5)O.Cl	43.7
1082	CC1=C(C=CC=C1C2=CC=CC=C2)COC(=O)[C@@H]3[C@@H](C3(C)C)/C=C(/C(F)(F)F)\Cl	0
1083	C1(=C(C(=C(C(=C1Cl)Cl)Cl)Cl)Cl)[N+](=O)[O-]	819
1084	CC1CC(OC(O1)C)OC(=O)C	863
1085	COC1=CC(=NC(=N1)NC(=O)NS(=O)(=O)CC2=CC=CC=C2C(=O)OC)OC	1.65
1086	C1CC2=CC=CC3=C2C1=CC=C3	4.846
1087	CC1=C(C(=CC=C1)[N+](=O)[O-])C	523
1088	CCNC1=NC(=NC(=N1)SC)NC(C)C	31.51
1089	C[C@H]1C[C@H]2[C@@H]3CC[C@@]([C@]3(C[C@@H]([C@@H]2[C@@]4(C1=CC(=O)C=C4)C)O)C)(C(=O)CO)O	5.452
1090	CC(C)(C)C(/C(=C\C1=C(C=C(C=C1)Cl)Cl)/N2C=NC=N2)O	2.587
1091	CN1C=NC2=C1C(=O)NC(=O)N2C	396
1092	CC(=C)[C@H]1CC2=C(O1)C=CC3=C2O[C@@H]4COC5=CC(=C(C=C5[C@@H]4C3=O)OC)OC	28.31
1093	C1CN(CCN1CCOCC(=O)O)C(C2=CC=CC=C2)C3=CC=C(C=C3)Cl	0
1094	CC1=C(C=CC(=C1)CC2=CC(=C(C=C2)N)C)N	3.984
1095	CC1=CC=CC=C1C(C2=CC=CC=C2)OCCN(C)C	0.723
1096	CCCN1CCCC[C@H]1C(=O)NC2=C(C=CC=C2C)C	15.49
1097	C1=CC(=C(C2=NC=C(C=C21)Cl)C(=O)O)Cl	0
1098	CC[C@H](C1=CC=C(C=C1)O)[C@@H](CC)C2=CC=C(C=C2)O	14
1099	C1=CC=C(C=C1)N=NC2=C(C=CC3=CC=CC=C32)O	0
1100	C[C@@H]1CN[C@H](C(=O)N([C@@H](C(=O)N[C@@H](C(=O)NCCCC2=CC=CC=C2O1)CC3=CC=C(C=C3)F)C)C)C4CC4	26.92
1101	CC#C[C@@]1(CC[C@@H]2[C@@]1(C[C@@H](C3=C4CCC(=O)C=C4CC[C@@H]23)C5=CC=C(C=C5)N(C)C)C)O	33.2
1102	C1=CC=C(C=C1)OC(=O)C2=CC=CC=C2C(=O)OC3=CC=CC=C3	584
1103	C1=CC=C(C(=C1)C2=NC(C(=O)NC3=C2C=C(C=C3)Cl)O)Cl	0.7399
1104	CN1C2=C(C=C(C=C2)Cl)C(=NC(C1=O)O)C3=CC=CC=C3	2.336
1105	CCOC(=O)C1=CC=CC=C1C(=O)OCC	42.5
1106	CC(C)COC(=O)C1=CC=CC=C1C(=O)OCC(C)C	345
1107	CCCCOC(=O)C1=CC=CC=C1C(=O)OCCCC	42.5
1108	CCCCCCOC(=O)C1=CC=CC=C1C(=O)OCCCCCC	27.7
1109	COC1=CC2=C(C=CN=C2C=C1OC)OC3=CC=C(C=C3)NC(=O)C4(CC4)C(=O)NC5=CC=C(C=C5)F	6.76
1110	C1COCCN1CC2=C(C=CC(=C2)Br)OCC3=CC=C(C=C3)Cl	54.95
1111	CC1=C(C2=C(N1CC(=O)O)C=CC(=C2)F)CC3=NC4=CC=CC=C4C=C3	4.04
1112	C[Si](CN1C=NC=N1)(C2=CC=C(C=C2)F)C3=CC=C(C=C3)F	6.959
1113	CCC(C)N(C)C(=O)C1=CC2=CC=CC=C2C(=N1)C3=CC=CC=C3Cl	42.12
1114	CCCCOC(=O)C1=CC=CC=C1C(=O)OCC2=CC=CC=C2	427
1115	C1CC1N2C=C(C(=O)C3=CC(=C(C=C32)N4CCNCC4)F)C(=O)O	4.17
1116	C1=CC=C(C=C1)N(C2=CC=CC=C2)N=O	8.288
1117	C1=CC(=C(C=C1F)F)C(CN2C=NC=N2)(CN3C=NC=N3)O	1.832
1118	CCN(CC)CC1=C(C=CC(=C1)NC2=C3C=CC(=CC3=NC=C2)Cl)O	32.36
1119	CC1=CC(=CC(=C1C[C@@H](C(=O)N(CC2=CC(=C(C=C2)OC)C(=O)O)[C@@H](C)C3=NC=C(N3)C4=CC=CC=C4)N)C)C(=O)N.Cl.Cl	1.89
1120	COP(=S)(OC)SCN1C(=O)C2=CC=CC=C2N=N1	32.63
1121	C1C2=CC=CC=C2C3=CC=CC=C31	12.08
1122	CC[C@@H](C1=NC2=C(C(=CC=C2)F)C(=O)N1C3=CC=CC=C3)NC4=NC=NC5=C4NC=N5	5.25
1123	CN1CCCC1=O	0.2081
1124	CCN1CCN(CC1)C2=CC=C(C=C2)NC3=CC(=NC=N3)N(C)C(=O)NC4=C(C(=CC(=C4Cl)OC)OC)Cl	28.84
1125	CCCCCOC(=O)COC1=C(C=C(C(=C1)N2C(=O)C3=C(C2=O)CCCC3)F)Cl	432
1126	C1=CC(=C(C(=C1)Cl)Cl)Cl	6.984
1127	CC1=C(C(=CC=C1)C)N	8.96
1128	CC1=CSC(=C1N(C(C)COC)C(=O)CCl)C	19.92
1129	CC1=CC=CC=C1CO[C@@H]2C[C@]3(CC[C@@]2(O3)C)C(C)C	28.17
1130	CC/C(=N\OCC)/C1=C(CC(CC1=O)C2=C(C=C(C=C2C)C)C)O	0
1131	C1(=C(C(=C(C(=C1Cl)Cl)Cl)Cl)Cl)O	8.764
1132	C1=C(C=C(C(=C1Cl)O)Cl)Cl	18.76
1133	C=CN1CCCC1=O	0
1134	CC(C)(C)C1=CC=CC=C1O	59.7
1135	CCC1=CC(=C(C(=C1)C(C)(C)C)O)CC2=C(C(=CC(=C2)CC)C(C)(C)C)O	0
1136	CC(C)(C)C1=CC(=CC(=C1O)C(C)(C)C)CN(C)C	1.55
1137	CC(C)(C)C1=CC(=C(C=C1O)C(C)(C)C)O	117
1138	CC1=CC(=C(C=C1)C(C)(C)C)O	36
1139	CCCCC(CN1C=NC=N1)(C#N)C2=CC=C(C=C2)Cl	16.4
1140	CCC(C)C1=C(C(=CC(=C1)[N+](=O)[O-])[N+](=O)[O-])O	0
1141	CCC1(CC2=CC=CC=C2O1)C3=NCCN3	3
1142	CN(C)CCNC(=O)C1=CC=CN2C1=NC3=CC4=CC=CC=C4C=C3C2=O	4.974
1143	CC1=CN=C(N=C1C2=CNC(=C2)C(=O)N[C@H](CO)C3=CC(=CC=C3)Cl)NC4=C(C=C(C=C4)F)Cl	8.51
1144	COC1=CC=CC=C1N	0
1145	COC1=CC=CC=C1O	44.9
1146	CC1=CC=CC2=CC=CC=C12	443
1147	C1=CC=C2C(=C1)C=CC=C2O	0
1148	C1=CC=C(C=C1)NC2=CC=CC3=CC=CC=C32	57.9
1149	CC(CS(=O)(=O)C1=CC=C(C=C1)F)(C(=O)NC2=CC(=C(C=C2)C#N)C(F)(F)F)O	0
1150	C1=CC=C(C=C1)C2=CC=CC=C2O	2.077
1151	CC[N+](CC)(CC1=CC=CC=C1)CC(=O)NC2=C(C=CC=C2C)C.C1=CC=C2C(=C1)C(=O)N=S2(=O)[O-]	0
1152	CN(C)C1=CC=C(C=C1)C(=O)C2=CC=C(C=C2)N(C)C	39.2
1153	C1=CC=C2C=CC=CC2=C1	10.39
1154	C1=CC=C2C(=C1)C=CC=N2	38.6
1155	CC(C)C1=CC(=C(C=C1O)O)C(=O)N2CC3=C(C2)C=C(C=C3)CN4CCN(CC4)C	23.44
1156	CC1(CC1)CCCC2=CC(=O)OC3=C2C(=O)NC(=O)N3	3
1157	CCOC1=CC2=C(C=C1)NC(C=C2C)(C)C	15.16
1158	C1=CC=C2C=C(C=CC2=C1)N	18.5
1159	CC1=CC2=C(C=C1)N=CC=C2	134
1160	C1=CC=C2C(=C1)C=CC(=O)O2	0
1161	CCN(CC)C1=CC=CC=C1	9.812
1162	C1=CC=C(C=C1)C2=NC(=NC(=N2)N)N	1.18
1163	CCCS(=O)(=O)NC1=C(C(=C(C=C1)F)C(=O)C2=CNC3=C2C=C(C=N3)C4=CC=C(C=C4)Cl)F	6.61
1164	C1=CC=C(C=C1)C2=CC(=C(C=C2)O)Cl	49.2
1165	CCCCN(CCCC)N=O	11.12
1166	C1=CC=C(C=C1)C2=CC=CC=C2	14.18
1167	C1=CC=C2C(=C1)NC3=CC=CC=C3S2	0
1168	C1=CC(=CC=C1C2=CC=C(C=C2)N)N	6.91
1169	COC1=C(C=C(C=C1)CC=C)OC	26.56
1170	C1=CC(=CC2=C1C=CC(=O)O2)O	49.5
1171	CCC1=C(CN(C1=O)C(=O)NCCC2=CC=C(C=C2)S(=O)(=O)NC(=O)NC3CCC(CC3)C)C	3.816
1172	C1=C(C(=CC(=C1Cl)Cl)Cl)OCC(=O)O	0
1173	CCOC1=CC=CC=C1C(=O)N	1.3
1174	CCOC(=O)C1=CC=C(C=C1)N	132
1175	CC1=NC(=NC(=N1)OC)NC(=O)NS(=O)(=O)C2=CC=CC=C2CCC(F)(F)F	10.37
1176	CCCOC(=O)C1=CC=C(C=C1)O	38
1177	C1=CC=C(C=C1)COC(=O)C2=CC=C(C=C2)O	633
1178	CCCCOC(=O)C1=CC=C(C=C1)O	39.3
1179	CCCCC(CC)C(=O)OCCOCCOCCOC(=O)C(CC)CCCC	22.62
1180	CC(C1CC1)C(CN2C=NC=N2)(C3=CC=C(C=C3)Cl)O	1.538
1181	C1COCCN1C2=NC(=NC(=C2)C3=CN=C(C=C3C(F)(F)F)N)N4CCOCC4	3
1182	CCOC1=CC2=C(C=C1)N=C(S2)N	12.02
1183	CCS(=O)(=O)C1=CC2=C(C=C1)OC(=N2)C3=CC4=CC=CC=C4C=C3	2.7
1184	C=CCC1=CC2=C(C=C1)OCO2	14.12
1185	CC1=C(C=CC(=C1)Cl)OCC(=O)O	0
1186	C1=CC(=C(C=C1Cl)Cl)OCC(=O)O	0
1187	C1=CC(=C(C=C1Cl)Cl)OCCCC(=O)O	0
1188	CC(CN=CC1=CC=CC=C1O)N=CC2=CC=CC=C2O	59.17
1189	COC1=NN(C(=O)S1)CSP(=S)(OC)OC	3.924
1190	C[C@@H]1CN[C@H](C(=O)N([C@@H](C(=O)N[C@@H](C(=O)NCCCC2=CC=CC=C2O1)CC3=CC=C(C=C3)F)C)C)C4CC4.O.Cl	0.2487
1191	C1=CC2=NNN=C2C=C1	0
1192	C1=CC=C2C(=C1)N=CS2	18.9
1193	C1=CC2=C(C=C1Cl)NC(=O)O2	10.96
1194	CCOC(=O)C1CC(=O)C(=C(C2CC2)O)C(=O)C1	3.82
1195	CC1=CC=CC=C1O	27.48
1196	CC1=CC=CC=C1N	0
1197	CC1=CC(=C(C=C1)C)C	9.32
1198	CC1=C(C=CC(=C1)Cl)N	8.06
1199	CC(COC1=CC=C(C=C1)OC2=CC=CC=C2)OC3=CC=CC=N3	16.86
1200	CC1=C(C=C(C=C1)N)Cl	65.3
1201	CN(C)C(=O)C(C1=CC=CC=C1)C2=CC=CC=C2	0
1202	CC1=C(C=C(C=C1)N)N	0
1203	C1=CC(=C(C=C1Cl)N)N	31.6
1204	CC1=CC(=C(C=C1)C)O	33.8
1205	C1=C(C(=CC(=C1Cl)Cl)Cl)Cl	8.842
1206	C1=C(C(=CC(=C1Cl)Cl)Cl)O	26.24
1207	CCOP(=S)(OC1=CN=C(N=C1)C(C)(C)C)OC(C)C	22.64
1208	CCOP(=O)(OCC)OC1=NC(=NC(=C1)C)C(C)C	34.62
1209	CC(C)(C)C1=CC=C(C=C1)CSC2=C(C(=O)N(N=C2)C(C)(C)C)Cl	63.93
1210	CCC1=CC(=C(C=C1)O)C(C)(C)C	102
1211	CC(C)(C)C1=CC(=C(C=C1)O)C(C)(C)C	2.52
1212	C1=CC(=C(C=C1Cl)CC2=C(C=CC(=C2)Cl)O)O	13.2
1213	CC1=C(C2=C(CCC(O2)(C)COC3=CC=C(C=C3)CC4C(=O)NC(=O)S4)C(=C1O)C)C	21.85
1214	COC1=C(C=CC(=C1)CC=C)O	103.6
1215	C/C=C/C1=CC(=C(C=C1)O)OC	71.78
1216	CC1=CC=CC=C1N=NC2=CC(=C(C=C2)N)C	6.89
1217	C[C@]12CCC(=O)C=C1C=C[C@@H]3[C@@H]2CC[C@]4([C@H]3CC[C@@]45CCC(=O)O5)C	6.61
1218	CN(C)C(=S)SC(=S)N(C)C	18.06
1219	CCN(CC)C(=S)SSC(=S)N(CC)CC	28.46
1220	CCOC1=NC(=NC(=N1)NC(=O)NS(=O)(=O)C2=CC=CC=C2C(=O)OC)NC	1.079
1221	CCCCCCCCCCCC(=O)N(C)CC(=O)O	42.07
1222	CC(C)CC1=C(C(=NC(=C1C(=O)SC)C(F)(F)F)C(F)F)C(=O)SC	13.25
1223	C[C@]12CC[C@H]3[C@H]([C@@H]1CC[C@@H]2C(=O)NC(C)(C)C)CC[C@@H]4[C@@]3(C=CC(=O)N4)C	4.5
1224	CC(C)(C)C1=CC=C(C=C1)O	26.8
1225	CC(=O)C1=CC=CC=C1	0
1226	CCC(C)SP(=O)(N1CCSC1=O)OCC	0
1227	CCNC1=CC2=C(C=C1C)C(=C3C=C(C(=[NH+]CC)C=C3O2)C)C4=CC=CC=C4C(=O)OCC.[Cl-]	0
1228	C1[C@H]([C@H](OC2=CC(=CC(=C21)O)O)C3=CC(=C(C(=C3)O)O)O)OC(=O)C4=CC(=C(C(=C4)O)O)O	135
1229	C1=CC=C(C=C1)[N+](=O)[O-]	8.168
1230	CC1=NC2=NC(=NN2C=C1)S(=O)(=O)NC3=C(C=CC=C3F)F	7.521
1231	CN(C)C1=CC(=CC=C1)O	0
1232	CC1=CC(=CC=C1)[N+](=O)[O-]	16.82
1233	C1=C(C=C(C(=C1Cl)N)Cl)[N+](=O)[O-]	4.434
1234	CCC(C)(C)OC	10.6
1235	CC1=CC2=C(C=C1)N=C(N2)C(=O)O	9.77
1236	CC1=C(C=C(C=C1)[N+](=O)[O-])C	454
1237	C1=CC(=C(C=C1[N+](=O)[O-])Cl)Cl	387
1238	CC1=C(C=C(C=C1)[N+](=O)[O-])N	22.4
1239	COC1=C(C=C(C=C1)[N+](=O)[O-])N	12.03
1240	CC1=NC=CN1CC2CCC3=C(C2=O)C4=CC=CC=C4N3C	1.402
1241	CC(C)C1=CC(=CC=C1)C(C)C	7.788
1242	C1=CC(=CC(=C1)[N+](=O)[O-])[N+](=O)[O-]	0
1243	CCCC(CCC)C(=O)O	0.4366
1244	CCC(C)C1=CC=C(C=C1)O	19.03
1245	COC(=O)C1=CC=C(C=C1)O	107.5
1246	CC1=CC=C(C=C1)N(C)C	20.38
1247	CC1=CC=C(C=C1)[N+](=O)[O-]	19.32
