# Supplementary material for: Insights into pharmacokinetic properties for exposure chemicals: predictive modelling of human plasma fraction unbound (fu) and hepatocyte intrinsic clearance (Clint) data using machine learning
Source: Royal Society of Chemistry journal article supplement (doi:10.1039/d4dd00082j), 2024-01-01
Supplement: d4dd00082j6.xlsx [file d4dd00082j6.xlsx]

## Sheet: Sheet1
Compound ID	SMILEs	Response (Fu)
1	C1(=C(C(=NC(=C1Cl)Cl)C(=O)O)Cl)N	0.23			*Green Highlighted rows indicates test set compound
2	CC(C(=O)NCC(=O)O)S	0.45
3	C1=CC=C2C(=C1)C(=O)OC23C4=C(C=C(C=C4)O)OC5=C3C=CC(=C5)O	0.151
4	C1=CC=C(C(=C1)CC2=CC=CC=C2O)O	0.041			*Yellow Highlighted rows indicates External set (Removed based on the activity outlier behavior) compound
5	C1=CC=C(C=C1)C(=O)NC2=CC3=CC(=C(C(=C3C=C2)O)N=NC4=CC=C(C=C4)N=NC5=CC=C(C=C5)S(=O)(=O)[O-])S(=O)(=O)[O-].[Na+].[Na+]	4.05e-05
6	C[C@@H]1[C@H]([C@H]([C@@H](O1)N2C=C(C(=O)NC2=O)F)O)O	0.61
7	C[C@]12C[C@@H]([C@H]3[C@H]([C@@H]1C[C@@H]4[C@]2(OC(O4)(C)C)C(=O)CO)C[C@@H](C5=CC(=O)C=C[C@]35C)F)O	0.24
8	C1CC(=O)N(C1)CCO	1
9	CC(C)N(CCC(C1=CC=CC=C1)(C2=CC=CC=N2)C(=O)N)C(C)C	0.16
10	CCCCCCC(CCCC)CO	1
11	CC(=O)O[Si](C=C)(OC(=O)C)OC(=O)C	1
12	CC(C)NC[C@@H](COC1=CC=CC2=CC=CC=C21)O	0.15
13	CN(C)/N=N/C1=C(NC=N1)C(=O)N	1
14	CC[C@H]1[C@@H]2C[C@H]3[C@H]4[C@@]5(C[C@@H]([C@H]2[C@H]5O)N3[C@@H]1O)C6=CC=CC=C6N4C	0.24
15	CCC1=C(C(=O)C=CO1)O	0.606
16	CCC(=O)OCC(=O)[C@]1([C@H](C[C@@H]2[C@@]1(C[C@@H]([C@]3([C@H]2CCC4=CC(=O)C=C[C@@]43C)Cl)O)C)C)OC(=O)CC	0.13
17	CC(=O)CCCCN1C(=O)C2=C(N=CN2C)N(C1=O)C	0.51
18	C1=CC(=C(C=C1OC2=C(C=C(C=C2I)C[C@@H](C(=O)O)N)I)I)O	3.46e-05
19	C[C@@H]1[C@H]([C@H](C[C@@H](O1)O[C@@H]2[C@H](O[C@H](C[C@@H]2O)O[C@@H]3[C@H](O[C@H](C[C@@H]3O)O[C@H]4CC[C@]5([C@@H](C4)CC[C@@H]6[C@@H]5CC[C@]7([C@@]6(C[C@@H]([C@@H]7C8=CC(=O)OC8)OC(=O)C)O)C)C)C)C)O)O	0.07
21	C1=CC(=CC=C1N)[N+](=O)[O-]	1.82e-06
22	C1=CC(=CC=C1[N+](=O)[O-])O	0.141
23	C1=CC(=CC=C1C(=N)N)OCCCCCOC2=CC=C(C=C2)C(=N)N	0.09
24	CCC1=CC=CC=C1	0.1676
25	C=CC1=CC=CC=C1	0.1801
26	CCNC1=NC(=NC(=N1)N)Cl	0.4588
27	CN1C(=C(C(=N1)Cl)C(=O)OC)S(=O)(=O)NC(=O)NC2=NC(=CC(=N2)OC)OC	0.009462
28	CC(C)(C1=CC=CC=C1)C2=CC=C(C=C2)NC3=CC=C(C=C3)C(C)(C)C4=CC=CC=C4	3.09e-08
29	CC(C)[C@@H](C(=O)N1CCC[C@H]1C2=NC=C(N2)C3=CC=C(C=C3)C4=CC=C(C=C4)C5=CN=C(N5)[C@@H]6CCCN6C(=O)[C@H](C(C)C)NC(=O)OC)NC(=O)OC	0.01
30	C1N2CN3CN1CN(C2)C3	0.352
31	C[C@H]1COC2=C3N1C=C(C(=O)C3=CC(=C2N4CCN(CC4)C)F)C(=O)O	0.75
32	C1=CC=C(C(=C1)NC2=NC(=NC(=N2)Cl)Cl)Cl	0
33	CC(C(=O)O)OC1=CC(=CC=C1)Cl	0.02239
34	CN(C)[C@H]1[C@@H]2C[C@@H]3CC4=C(C=CC(=C4C(=C3C(=O)[C@@]2(C(=C(C1=O)C(=O)N)O)O)O)O)N(C)C	0.005
35	C1=CC=C(C=C1)OC2=C3C=CC=CN3C(=O)C(=C2)C(=O)NC4=NNN=N4	0.0191
36	CC(C)OC(=O)NC1=CC(=CC=C1)Cl	0.0833
37	COC(=O)CC1=CC=CC=C1	0.8006
38	CN(C)C(=O)NC1=CC=CC=C1	0.564
39	CCN(CC)CCNC(=O)C1=CC=C(C=C1)NS(=O)(=O)C	0.96
40	C1=CC=C(C=C1)NC2=CC=C(C=C2)N	0.1434
41	CN(C)C1=CC=C(C=C1)CC2=CC=C(C=C2)N(C)C	0.001109
42	C[C@]12C=CC3=C4CCC(=O)C=C4CC[C@H]3[C@@H]1CC[C@@H]2O	0.0999
43	C1=CC(=CC=C1CC2=CC=C(C=C2)N)N	0.261
44	C1=CC(=CC=C1N)OC2=CC=C(C=C2)N	0.3284
45	CCCCCC/C(=C\C1=CC=CC=C1)/C=O	0.009805
46	C1=CC=C(C=C1)NC(=NC2=CC=CC=C2)N	0.7844
47	CCNC1=CC=CC(=C1)C	0.1414
48	COC1=C(C=C(C=C1)Cl)C(=O)NCCC2=CC=C(C=C2)S(=O)(=O)NC(=O)NC3CCCCC3	0.021
49	[C@@H]12[C@@H]([C@H]([C@@H]3[C@H]1O3)Cl)[C@]4(C(=C([C@@]2(C4(Cl)Cl)Cl)Cl)Cl)Cl	0.01068
50	CC(C)C[C@@H]1CN2CCC3=CC(=C(C=C3[C@H]2C[C@H]1OC(=O)[C@H](C(C)C)N)OC)OC	0.01
51	COC1=C(C(=NC=C1)CS(=O)C2=NC3=C(N2)C=C(C=C3)OC(F)F)OC	0.02
52	CNCCCC12CCC(C3=CC=CC=C31)C4=CC=CC=C24	0.11
53	COP(=O)(N)SC	0.396
54	CCN(CC)CCNC(=O)C1=CC(=C(C=C1OC(C)C(=O)C)N)Cl	0.46
55	CC(=O)OCC(COC(=O)C)OC(=O)C	5.77e-05
56	CC[C@@H](C(=O)N)N1CCCC1=O	0.9
57	CCCCN(CCO)CCO	1
58	C[C@@H]1CCN(CCN1C(=O)C2=C(C=CC(=C2)C)N3N=CC=N3)C4=NC5=C(O4)C=CC(=C5)Cl	0.05
59	CCCCCCCCCC(=O)N[C@@H](CC1=CNC2=CC=CC=C21)C(=O)N[C@@H](CC(=O)N)C(=O)N[C@@H](CC(=O)O)C(=O)N[C@H]3[C@H](OC(=O)[C@@H](NC(=O)[C@@H](NC(=O)[C@H](NC(=O)CNC(=O)[C@@H](NC(=O)[C@H](NC(=O)[C@@H](NC(=O)[C@@H](NC(=O)CNC3=O)CCCN)CC(=O)O)C)CC(=O)O)CO)[C@H](C)CC(=O)O)CC(=O)C4=CC=CC=C4N)C	0.083
60	CCCCC(CC)COC(=O)CCCCC(=O)OCC(CC)CCCC	0.03861
61	CCCCC(CC)COC(=O)CCCCCCCC(=O)OCC(CC)CCCC	0.03126
62	C1=CC=C(C=C1)N=NC2=CC=CC=C2	2.8e-06
63	C#CCN1C(=O)COC2=CC(=C(C=C21)N3C(=O)C4=C(C3=O)CCCC4)F	0.02807
64	CCCCCCCCOC(=O)C1=CC(=C(C(=C1)O)O)O	0.000904
65	CC1=C(C=CN=C1CS(=O)C2=NC3=CC=CC=C3N2)OCC(F)(F)F	0.021
66	CNS(=O)(=O)CC1=CC2=C(C=C1)NC=C2CCN(C)C	0.83
67	CCNC1=CC=CC=C1	0.214
68	CCOC(=O)[C@H](CCC1=CC=CC=C1)N[C@@H](C)C(=O)N2CC3=CC(=C(C=C3C[C@H]2C(=O)O)OC)OC	0.12
69	CC(=O)NC1=CC=C(C=C1)O	0.9398
70	CC1=CC(=C(N=C1)C2=NC(C(=O)N2)(C)C(C)C)C(=O)O	0.5468
71	CCCCC1=CC=C(C=C1)N	0.0599
72	CS(=O)(=O)C1=CC(=C(C=C1)C(=O)C2C(=O)CCCC2=O)[N+](=O)[O-]	0.3548
73	CN(C1CCN(CC1)CC(COC2=CC=C(C=C2)F)O)C3=NC4=CC=CC=C4S3	0.014
74	CC(=CC1C(C1(C)C)C(=O)OCC2=COC(=C2)CC3=CC=CC=C3)C	0
75	CCCN[C@H]1CCC2=C(C1)SC(=N2)N	0.85
76	C1=CC=C(C=C1)OCCOC2=CC=CC=C2	0
77	CCCCCCCC1CCC(=O)O1	0.069
78	C[C@@H]1C[C@@H]([C@@H]2[C@H](C[C@H]([C@@](O2)(C(=O)C(=O)N3CCCC[C@H]3C(=O)O[C@@H]([C@@H]([C@H](CC(=O)[C@@H](/C=C(/C1)\C)CC=C)O)C)/C(=C/[C@@H]4CC[C@H]([C@@H](C4)OC)O)/C)O)C)OC)OC	0.01
79	CO[C@@H]1[C@@H]([C@H]([C@@H]([C@H](O1)COS(=O)(=O)O)O[C@H]2[C@@H]([C@H]([C@@H]([C@@H](O2)C(=O)O)O[C@@H]3[C@@H]([C@H]([C@@H]([C@H](O3)COS(=O)(=O)O)O[C@H]4[C@@H]([C@H]([C@@H]([C@H](O4)C(=O)O)O[C@@H]5[C@@H]([C@H]([C@@H]([C@H](O5)COS(=O)(=O)O)O)O)NS(=O)(=O)O)O)O)OS(=O)(=O)O)NS(=O)(=O)O)O)OS(=O)(=O)O)O)NS(=O)(=O)O	0.21
80	CC[C@]1(C[C@@H](C2=C([C@H]1O)C(=C3C(=C2O)C(=O)C4=C(C3=O)C=CC=C4O)O)O[C@H]5C[C@@H]([C@@H]([C@@H](O5)C)O)N6CCOCC6)O	0.09
81	COC1=CC=C(C=C1)CO	0.9392
82	CC/C(=C(\C1=CC=CC=C1)/C2=CC=C(C=C2)OCCN(C)C)/C3=CC=CC=C3	0.00165
83	C1=CC(=CN=C1)CC(O)(P(=O)(O)O)P(=O)(O)O	0.76
84	C[C@H](C(=O)OCC#C)OC1=CC=C(C=C1)OC2=C(C=C(C=N2)Cl)F	0.0148
85	C1CCC(=O)NCC1	0.761
86	CC(C)C1=C(C(=CC=C1)C(C)C)N2C(=O)C3=C(C2=O)C=C(C=C3)O	0.0415
87	CC1OCC2C(O1)C(C(C(O2)OC3C4COC(=O)C4C(C5=CC6=C(C=C35)OCO6)C7=CC(=C(C(=C7)OC)O)OC)N(C)C)O.Cl	0.013
88	CC(C)C1CCC(CC1)C(=O)N[C@H](CC2=CC=CC=C2)C(=O)O	0.029
89	CC(=CCC/C(=C/COC(=O)C)/C)C	0.192
90	C1CC1N2C=C(C(=O)C3=CC(=C(C(=C32)Cl)N4CCC(C4)N)F)C(=O)O	0.96
92	CCCCOC(=O)CCCCC(=O)OCCCC	0.5872
93	COC(=O)NC1=NC2=CC=CC=C2N1	0.4872
94	CCOC1=CC=CC=C1OCCN[C@H](C)CC2=CC(=C(C=C2)OC)S(=O)(=O)N	0.01
95	C[C@@H]1CC[C@@]23CCC(=O)[C@H]2[C@@]1([C@@H](C[C@@]([C@H]([C@@H]3C)O)(C)C=C)OC(=O)CS[C@@H]4CC[C@H](C[C@H]4O)N)C	0.17
96	CC(=CCC/C(=C\CO)/C)C	0
97	CC1=C(C(=O)N2CCCCC2=N1)CCN3CCC(CC3)C4=NOC5=C4C=CC(=C5)F	0.1
98	CC1=CC=C(C=C1)O	0.3259
99	C1=CC(=CC=C1Cl)Cl	0.02291
100	C1=CC(=CC=C1N)Cl	0.264
101	C1=CC(=CC=C1O)Cl	0.23
102	CC1=CC=C(C=C1)N	0.422
103	C(CC(=O)O)C(=O)CN	0.88
105	COC(=O)CCC(=O)OC	0.9999
106	C[N+]1(CCC2=CC(=C(C=C2C1CC3=CC(=C(C(=C3)OC)OC)OC)OC)OC)CCCOC(=O)CC/C=C/CCC(=O)OCCC[N+]4(CCC5=CC(=C(C=C5C4CC6=CC(=C(C(=C6)OC)OC)OC)OC)OC)C	0.7
107	C1=NC(=C2C(=N1)N(C=N2)CCOCP(=O)(O)O)N	0.96
108	C=CC=C	0.5027
109	C(CCl)Cl	0.6167
110	C=CC#N	0.8632
111	C(CCC(=O)NN)CC(=O)NN	0.9601
112	B([C@H](CC(C)C)NC(=O)CNC(=O)C1=C(C=CC(=C1)Cl)Cl)(O)O	0.01
113	C[C@H]1C(=O)N[C@H](C(=O)N[C@H]2CSSC[C@H]3C(=O)N[C@H](C(=O)N[C@H](C(=O)NCC(=O)N[C@H](C(=O)N[C@@H](CSSC[C@@H](C(=O)N[C@@H](CSSC[C@@H](C(=O)N[C@H](C(=O)NCC(=O)N[C@H](C(=O)NCC(=O)N1)CCCCN)CCCCN)N)C(=O)N[C@H](C(=O)NCC(=O)N[C@H](C(=O)N3)CO)[C@@H](C)O)NC(=O)[C@@H](NC(=O)[C@@H](NC(=O)[C@@H](NC(=O)[C@@H](NC(=O)[C@@H](NC(=O)[C@@H](NC2=O)CO)CCCNC(=N)N)CC(C)C)CCSC)CC4=CC=C(C=C4)O)CC(=O)O)C(=O)N)CCCCN)CO)CCCN…	0.5
114	CC(C)(C)C(CCC1=CC=C(C=C1)Cl)(CN2C=NC=N2)O	0.06601
115	CC1=CC(=CC=C1)O	0.363
116	CC1=CC(=CC=C1)N	0.549
117	C1=CC(=CC(=C1)O)O	0.7448
118	C1C(=O)NC2=C(C=C(C=C2)Cl)C(=N1)C3=CC=CC=C3	0.03
119	CC1=CC=CC=C1	0.3
120	C1=CC=C(C=C1)Cl	0.202
121	C1=CC=C(C=C1)O	0.6201
122	CCCCOC(=O)CCCCCCCCC(=O)OCCCC	7.05e-08
123	C[C@@H]1[C@H]([C@@H](C[C@@H](O1)O[C@@H]2[C@H](O[C@]3(C[C@H]2O)O[C@@H]4[C@H](O[C@H]([C@H]([C@]4(O3)C)O)O[C@@H]5[C@H]([C@@H](O[C@@H]([C@@H]5OC)C)O[C@@H]6[C@H](O[C@H]([C@H]([C@H]6O)OC)O[C@H]7[C@@H]([C@H]8[C@H](CO7)O[C@@]9(O8)[C@H]1[C@H]([C@@H](CO9)OC(=O)C2=C(C=C(C=C2C)O)O)OCO1)O)COC)O)C)C)O[C@H]1C[C@]([C@H]([C@@H](O1)C)OC)(C)[N+](=O)[O-])OC(=O)C1=C(C(=C(C(=C1OC)Cl)O)Cl)C	0.04
124	CN1[C@@H]2CCC[C@H]1CC(C2)NC(=O)C3=NN(C4=CC=CC=C43)C	0.35
125	C1CCOC1	0.8251
126	C1=COC=C1	0.6212
127	C[C@@H]1C[C@H]2[C@@H]3CCC4=CC(=O)C=C[C@@]4(C3=CC[C@@]2([C@H]1C(=O)CN5CCN(CC5)C6=NC(=NC(=C6)N7CCCC7)N8CCCC8)C)C	0.006
128	CC(=O)CCC(=O)C	0.93
129	C1=CC(=CC(=C1)C(F)(F)F)/C(=N\OCCCCC(=O)O)/C2=CN=CC=C2	0.033
130	CC#CC1=NC(=NC(=C1)C)NC2=CC=CC=C2	0.03419
131	CCCCCCCC/C=C\CCCCCCCC(=O)N(C)CC(=O)O	3.54e-08
132	C=CC(=O)NCNC(=O)C=C	1
133	COC1=C(C=C(C=C1)/C(=C/C(=O)N2CCOCC2)/C3=CC=C(C=C3)Cl)OC	0.09428
134	CCCCCC	0.1931
135	C[C@@H]1CN(C[C@@H](N1)C)C2=C(C(=C3C(=C2F)N(C=C(C3=O)C(=O)O)C4CC4)N)F	0.55
136	CC(=O)OCCOCCOCCOC(=O)C	0.895
137	C(CNCCN)N	0.9678
138	CC(C1=CC2=CC=CC=C2S1)N(C(=O)N)O	0.07
139	C(COCCO)O	0.97
140	CCCCN(CC)C(=O)SCCC	5.36e-08
141	CCCCCCCC	0.1031
142	CCCCOCCO	0.8332
143	CC1=NN(C(=C1/C=N/OCC2=CC=C(C=C2)C(=O)OC(C)(C)C)OC3=CC=CC=C3)C	0.0046
144	CCCCCCCCCCCC(=O)OC	0.03637
145	CCCCCCCCC	0.08128
146	CCCCCCCCO	0.647
147	COC(=O)CCCC(=O)OC	0.6989
148	C1CN(CCN1CCOCCO)C2=NC3=CC=CC=C3SC4=CC=CC=C42	0.17
149	C1CSC(=NC#N)N1CC2=CN=C(C=C2)Cl	0.2857
150	CCCCCCCCCCCC[N+](C)(C)C.[Cl-]	0.0364
151	CCCCCCCCCCCCN(C)C	0.00699
152	C1=CC(=C(C=C1Cl)Cl)C(CN2C=NC=N2)COC(C(F)F)(F)F	0.02484
153	CCN(CC)CCS(=O)(=O)[C@@H]1CCN2[C@H]1C(=O)O[C@@H]([C@@H](/C=C\C(=O)NC/C=C\C(=C/[C@H](CC(=O)CC3=NC(=CO3)C2=O)O)\C)C)C(C)C	0.82
154	CCC1=CC=C(C=C1)C(=O)NN(C(=O)C2=CC(=CC(=C2)C)C)C(C)(C)C	0.03378
155	COCCOCCOCCOC	0.66
156	CCOCCOCCOCCO	1
157	CCC1=CN=C(C=C1)CCOC2=CC=C(C=C2)CC3C(=O)NC(=O)S3.Cl	0.0106
158	C1=CC2=C(C=C1Cl)N(C(=O)N(C2=O)CC3=C(C=C(C=C3)Br)F)CC(=O)O	0.0091
159	C1=CC(=CC=C1C#N)C(C2=CC=C(C=C2)C#N)N3C=NC=N3	0.41
160	CC1CN(CCN1)C2=C(C=C3C(=C2OC)N(C=C(C3=O)C(=O)O)C4CC4)F	0.8
161	CC1=NC2=C(C=C(C=C2)CN(C)C3=CC=C(S3)C(=O)N[C@@H](CCC(=O)O)C(=O)O)C(=O)N1	0.05
162	C[C@@]12[C@@H]([C@@H](C[C@@H](O1)N3C4=CC=CC=C4C5=C6C(=C7C8=CC=CC=C8N2C7=C53)[C@H](NC6=O)O)NC)OC	0.0022
163	CC(C)C[C@@H]([C@@H]([C@H](CC1CCCCC1)NC(=O)[C@H](CC2=CN=CN2)NC(=O)[C@H](CC3=CC=C(C=C3)OC)NC(=O)CC(C)(C)N)O)O	0.07
164	C1CC1(C(=O)NC2=C(C=C(C=C2)Cl)Cl)C(=O)O	0.984
165	C[C@@]1(C(=O)N2[C@H](C(=O)N3CCC[C@H]3[C@@]2(O1)O)CC4=CC=CC=C4)NC(=O)[C@H]5CN([C@@H]6CC7=CNC8=CC=CC(=C78)C6=C5)C	0.02
166	CC(C)(C)C1=CC(=CC(=C1OC)C2=CC3=C(C=C2)C=C(C=C3)NS(=O)(=O)C)N4C=CC(=O)NC4=O	0.005
167	CO/N=C(/C1=NSC(=N1)N)\C(=O)N[C@H]2[C@@H]3N(C2=O)C(=C(CS3)C[N+]4=C5C=CC=NN5C=C4)C(=O)[O-]	0.74
168	CCN(C1CCCCC1)C(=O)SCC	0
169	C1=CC(=CC=C1C(CC(=O)O)CN)Cl	0.69
170	COC(=O)C(C1CCCCN1)C2=CC=CC=C2	0.85
171	CCCCC(CC)CN1C(=O)C2C3CC(C2C1=O)C=C3	0
172	CN(C)CC/C=C\1/C2=CC=CC=C2SC3=C1C=C(C=C3)Cl	0.01
173	[H+].[H+].C1=CC=C(C=C1)COCC(C(=O)[O-])N(CCN(CCN(CC(=O)[O-])CC(=O)[O-])CC(=O)[O-])CC(=O)[O-].[Gd+3]	1
174	COC(=O)[C@H](C1=CC=CC=C1Cl)N2CCC3=C(C2)C=CS3	0.02
175	CCOC(=O)[C@H](C)OC1=CC=C(C=C1)OC2=NC3=C(O2)C=C(C=C3)Cl	0.00537
176	C1=CN(C(=O)N=C1N)C[C@@H](CO)OCP(=O)(O)O	1
177	CC[C@@H]1[C@@]([C@@H]([C@H](C(=O)[C@@H](C[C@@]([C@@H]([C@H]([C@@H]([C@H](C(=O)O1)C)O[C@H]2C[C@@]([C@H]([C@@H](O2)C)O)(C)OC)C)O[C@H]3[C@@H]([C@H](C[C@H](O3)C)N(C)C)O)(C)O)C)C)O)(C)O	0.5653
178	CCCCCN(C)CCC(O)(P(=O)(O)O)P(=O)(O)O	0.15
179	CC(C)OC1=CC=CC=C1OC(=O)NC	0.2159
180	CC(C)C1(C(=O)NC(=N1)C2=C(C=C(C=N2)COC)C(=O)O)C	0.4548
181	C1=CC=C(C=C1)C(CCC2=CC=C(C=C2)Cl)(CN3C=NC=N3)C#N	0.0188
182	C1=CC=C(C=C1)C(=O)C2=C(C(=C(C=C2)O)O)O	0.0185
183	CCCCC1=NC(=C(N1CC2=CC=C(C=C2)C3=CC=CC=C3C4=NNN=N4)CO)Cl	0.01
184	CC1=CC2=C([C@@H]3[C@@H]4[C@H]5C6=C(C(=C7C(=C6[C@@H](N4[C@H]([C@H](C2)N3C)O)COC(=O)[C@@]8(CS5)C9=CC(=C(C=C9CCN8)O)OC)OCO7)C)OC(=O)C)C(=C1OC)O	0.06
185	CC1=C2[C@H](C(=O)[C@@]3([C@H](C[C@@H]4[C@]([C@H]3[C@@H]([C@@](C2(C)C)(C[C@@H]1OC(=O)[C@@H]([C@H](C5=CC=CC=C5)NC(=O)OC(C)(C)C)O)O)OC(=O)C6=CC=CC=C6)(CO4)OC(=O)C)O)C)O	0.04
186	CC1=C(SC=C1)C(=CCCN2CCC[C@H](C2)C(=O)O)C3=C(C=CS3)C	0.04
187	CN(CCC1=CC=C(C=C1)NS(=O)(=O)C)CCOC2=CC=C(C=C2)NS(=O)(=O)C	0.47
188	C1C2C(COS(=O)O1)C3(C(=C(C2(C3(Cl)Cl)Cl)Cl)Cl)Cl	0.11
189	C1=CC(=CC=C1C(C2=CC=C(C=C2)Cl)(C(Cl)(Cl)Cl)O)Cl	1.57e-08
190	C1=CC(=C(C=C1NC(=O)C2=C(C(=CC(=C2)Cl)Cl)O)Cl)Cl	9.31e-09
191	C[C@@]1(CO[C@@H]([C@@H]([C@H]1NC)O)O[C@H]2[C@@H](C[C@@H]([C@H]([C@@H]2O)O[C@@H]3[C@@H](CC=C(O3)CNCCO)N)N)NC(=O)[C@H](CCN)O)O	0.84
192	CC1=CC=C(C=C1)S(=O)(=O)NC(=O)NN2CCCCCC2	0.065
193	C1=CC=C(C=C1)OP(=O)(OC2=CC=CC=C2)OC3=CC=CC=C3	0.002852
194	C1[C@@H]2CC(C[C@H]3N2CC(=O)C1C3)OC(=O)C4=CNC5=CC=CC=C54	0.49
195	C(CCl)OP(=O)(OCCCl)OCCCl	0.44
196	CC(C)(/C=N/OC(=O)NC)SC	0.4809
197	CC1=C(C(=CC=C1)Cl)C(=O)N[C@@H](CC2=CC=C(C=C2)NC(=O)C3=C(C=NC=C3Cl)Cl)C(=O)O	0.1
198	CC1(C(=O)NC(=O)N1CO)C	0.921
199	COC1=C2C3=C(C(=O)CC3)C(=O)OC2=C4[C@@H]5C=CO[C@@H]5OC4=C1	0.1045
200	CNCC[C@@H](C1=CC=CS1)OC2=CC=CC3=CC=CC=C32	0.04
201	CC(C)[C@H]1C2=C(CC[C@@]1(CCN(C)CCCC3=NC4=CC=CC=C4N3)OC(=O)COC)C=C(C=C2)F	0.005
202	CCCCCCCCCCCCOC(=O)C1=CC(=C(C(=C1)O)O)O	2.2e-08
203	C1=CC(=C(C(=C1)F)C(=O)NC(=O)NC2=CC(=C(C=C2)OC(C(OC(F)(F)F)F)(F)F)Cl)F	0
204	C1=CC(=C(C=C1C2=C(C(=O)C3=C(C=C(C=C3O2)O)O)O)O)O	0.0176
205	CCOC(=O)C1=CC=CC=C1C(=C2C=C(C(=O)C(=C2)Br)Br)C3=CC(=C(C(=C3)Br)O)Br	0.0114
206	CC(C)CC1=C(C(=NC(=C1C(=O)OC)C(F)F)C(F)(F)F)C2=NCCS2	0.01139
207	C1=CC=C2C(=C1)C(=O)C3=C(C2=O)C=C(C=C3)N	0.0305
208	CCCCC(CC)COC(=O)C1=CC=CC=C1C(=O)OCC(CC)CCCC	0
209	CCCCCCCCOC(=O)C1=CC=CC=C1C(=O)OCCCCCCCC	0.0233
210	CC(=O)NC1=C(C(=C(C(=C1I)C(=O)O)I)NC(=O)C)I	1
211	CC1=C(C=CN=C1CS(=O)C2=NC3=CC=CC=C3N2)OCCCOC	0.037
212	C1=CN(C=N1)CC(O)(P(=O)(O)O)P(=O)(O)O	0.78
213	CCCN(CC)CC1COC2(O1)CCC(CC2)C(C)(C)C	0.005446
214	CCN(CCCC(C)NC1=C2C=CC(=CC2=NC=C1)Cl)CCO	0.57
215	C1=CC=C(C=C1)COC(=O)C2=CC=CC=C2O	3.35e-08
216	CC1=CC(=C2C(=C1)[C@H](CCCN2CC3CCC(CC3)C(=O)O)N(CC4=CC(=CC(=C4)C(F)(F)F)C(F)(F)F)C5=NN(N=N5)C)C	0.001
217	C1(=C(C(=C(C(=C1Cl)Cl)Cl)Cl)Cl)Cl	0.01
218	CC1=CN=C(C(=C1OC)C)CS(=O)C2=NC3=C(N2)C=C(C=C3)OC	0.03
219	CCC1=NN(C(=C1Cl)C(=O)NCC2=CC=C(C=C2)C(C)(C)C)C	0
220	C[C@]12CC[C@H]3[C@H]([C@@H]1CC[C@@H]2C(=O)NC(C)(C)C)CC=C4[C@@]3(CCC(=C4)C(=O)O)C	0.03
221	C1C[C@H](N2C[C@@H]1N(C2=O)OS(=O)(=O)O)C(=O)N	0.93
222	C[C@H]1COC2=C3N1C=C(C(=O)C3=C(C(=C2N4CCN(CC4)C)F)N)C(=O)O	0.82
223	COC(=O)C1=CC=CC=C1O	0.107
224	CC1COC(O1)(CN2C=NC=N2)C3=C(C=C(C=C3)OC4=CC=C(C=C4)Cl)Cl	0.0115
225	C1=CC(=C(C(=C1)Cl)C#N)Cl	0.06222
226	CC1=CC(=C(C(=C1)C(C)(C)C)O)CC2=C(C(=CC(=C2)C)C(C)(C)C)O	2.14e-08
227	CCC(C)OC(=O)N1CCCCC1CCO	0.2842
228	C1[C@H](O[C@H]([C@H]1F)N2C=CC(=NC2=O)N)CO	1
229	CC(C)(C)C1=NC(=C(S1)C2=NC(=NC=C2)N)C3=C(C(=CC=C3)NS(=O)(=O)C4=C(C=CC=C4F)F)F	0.003
230	C1=CC=C(C=C1)C(=O)C2=CC=CC=C2	0.06543
231	C1CC(CCC1CN)C(=O)O	0.97
232	CCCCCN(CCCOC)C(=O)[C@@H](CCC(=O)O)NC(=O)C1=CC(=C(C=C1)Cl)Cl	0.024
233	COC1=C(C=CC(=C1)C2=CC(=C(C=C2)N)OC)N	0.3343
234	CC1CN(CCN1)C2=C(C(=C3C(=C2)N(C=C(C3=O)C(=O)O)C4CC4)C)F	0.82
235	CC1=C(C=CC(=C1)C2=CC(=C(C=C2)N)C)N	0.1427
236	C1=C(C=C(C(=C1Cl)N2C(=C(C(=N2)C#N)S(=O)C(F)(F)F)N)Cl)C(F)(F)F	0.0461
237	CC1=CC=C(C=C1)C2=C(N=C(N2S(=O)(=O)N(C)C)C#N)Cl	0.051
238	C1=CC=C2C=C3C=CC=CC3=CC2=C1	0.0252
239	CC[C@@H]1C(=O)N2CCC[C@H]2C(=O)N([C@H](C(=O)N3C[C@H](C(=O)C[C@H]3C(=O)N[C@H](C(=O)O[C@@H]([C@@H](C(=O)N1)NC(=O)C4=C(C=CC=N4)O)C)C5=CC=CC=C5)CS[C@@H]6CN7CCC6CC7)CC8=CC=C(C=C8)N(C)C)C	0.34
240	C1=CSC(=C1)C(=O)C2=C(N(C3=C2C=C(C=C3)Cl)C(=O)N)O	0.0007
241	C[C@H](C(=O)N)NC(=O)[C@@H]1CCCN1C(=O)[C@H](CCCN=C(N)N)NC(=O)[C@H](CC(C)C)NC(=O)[C@@H](CCCNC(=O)N)NC(=O)[C@H](CC2=CC=C(C=C2)O)NC(=O)[C@H](CO)NC(=O)[C@@H](CC3=CN=CC=C3)NC(=O)[C@@H](CC4=CC=C(C=C4)Cl)NC(=O)[C@@H](CC5=CC6=CC=CC=C6C=C5)NC(=O)C	0.14
242	C1=CC=C(C=C1)CC2=C(C=CC(=C2)Cl)O	3.25e-06
243	CC(C(=O)O)OC1=C(C=C(C=C1)Cl)Cl	0.008529
244	C[C@@H]1[C@@H]2[C@H](C(=O)N2C(=C1SC3CN4C=NC=[N+]4C3)C(=O)[O-])[C@@H](C)O	0.92
245	C[C@@]12CC[C@@H](C1(C)C)C[C@@]2(C3=CC=CC=C3)OCCN(C)C	0.05
246	CCOC(=O)C1=CC=C(C=C1)O	0.1057
247	CC1=CC(=C(C=C1)OC)N	0.4043
248	CN(C)[C@H]1[C@@H]2C[C@@H]3CC4=C(C=C(C(=C4C(=C3C(=O)[C@@]2(C(=C(C1=O)C(=O)N)O)O)O)O)NC(=O)CN5CCCC5)F	0.18
249	C1=CC=C(C(=C1)O)O	0.0268
250	C1=CC(=C(C=C1Cl)Cl)Cl	5.27e-07
251	C1=CC(=C(C=C1Cl)Cl)O	0.23
252	CC(C)(C)C1=C(C=CC(=C1)OC)O	0.07217
253	COC1=NC(=NC2=C1N=CN2[C@H]3[C@H]([C@@H]([C@H](O3)CO)O)O)N	0.8
254	CC1=C(C=C(C=C1)[N+](=O)[O-])[N+](=O)[O-]	0.09602
255	COC1=C(C=CC(=C1)C=O)O	0.322
256	C1=CC=C(C=C1)CNC2=NC=NC3=C2NC=N3	0.138
257	C1=CC(=C(C=C1C[C@H](C(=O)O)OC(=O)/C=C/C2=C3[C@@H]([C@H](OC3=C(C=C2)O)C4=CC(=C(C=C4)O)O)C(=O)O[C@H](CC5=CC(=C(C=C5)O)O)C(=O)O)O)O	0.08
258	CC1=CC(=NC(=N1)NC2=CC=CC=C2)C3CC3	0.002141
259	C/C=C/C[C@@H](C)C(=O)[C@H]1C(=O)N[C@H](C(=O)N(CC(=O)N([C@H](C(=O)N[C@H](C(=O)N([C@H](C(=O)N[C@H](C(=O)N[C@@H](C(=O)N([C@H](C(=O)N([C@H](C(=O)N([C@H](C(=O)N1C)C(C)C)C)CC(C)C)C)CC(C)C)C)C)C)CC(C)C)C)C(C)C)CC(C)C)C)C)C(C)C	0.022
260	CNS(=O)(=O)CCC1=CC2=C(C=C1)NC=C2C3CCN(CC3)C	0.7
261	CC1=CN=C(C=N1)C(=O)N[C@H]2CCCCC/C=C\[C@@H]3C[C@]3(NC(=O)[C@@H]4C[C@H](CN4C2=O)OC5=NC6=CC=CC=C6C7=CC=CC=C75)C(=O)NS(=O)(=O)C8CC8	0.022
262	CCOC(=O)CC(C(=O)OCC)SP(=S)(OC)OC	0.145
263	CCCOC(=O)C1=CC(=C(C(=C1)O)O)O	0.0258
264	C1CC(=O)N[C@@H]1C(=O)N2CSC[C@H]2C(=O)O	0.96
265	CC1=C(C=CC(=C1)OP(=S)(OC)OC)[N+](=O)[O-]	0
266	CN(CCOC1=CC=C(C=C1)CC2C(=O)NC(=O)S2)C3=CC=CC=N3	0.002
267	C1CC2=NC1=C(C3=CC=C(N3)C(=C4C=CC(=N4)C(=C5C=CC(=C2C6=CC(=CC=C6)O)N5)C7=CC(=CC=C7)O)C8=CC(=CC=C8)O)C9=CC(=CC=C9)O	0.14
268	CCNC1=NC(=NC(=N1)Cl)NCC	0.2845
269	C1=CC=C(C=C1)NC2=CC=C(C=C2)O	0.0582
270	C1=CC=C(C=C1)NC2=CC=CC=C2	0.003875
271	CCCCCCCN(CC)CCCC(C1=CC=C(C=C1)NS(=O)(=O)C)O	0.6
272	C1=CC=C(C=C1)NNC2=CC=CC=C2	1.97e-06
273	CC1=NN(C(=O)N1C(F)F)C2=C(C=C(C(=C2)NS(=O)(=O)C)Cl)Cl	0.9933
274	CC1=C(N=CN1)CN2CCC3=C(C2=O)C4=CC=CC=C4N3C	0.18
275	CCS(=O)(=O)C1=C(N=CC=C1)S(=O)(=O)NC(=O)NC2=NC(=CC(=N2)OC)OC	0.6278
276	C1=CC=C(C=C1)OCCO	0.2957
277	COCCOC[C@H](CC1(CCCC1)C(=O)NC2CCC(CC2)C(=O)O)C(=O)O	0.8723
278	COCCOC[C@H](CC1(CCCC1)C(=O)NC2CCC(CC2)C(=O)O)C(=O)OC3=CC4=C(CCC4)C=C3	0.2659
279	CCC1(CC2CC(C3=C(CCN(C2)C1)C4=CC=CC=C4N3)(C5=C(C=C6C(=C5)C78CCN9C7C(C=CC9)(C(C(C8N6C)(C(=O)NC(C(C)C)P(=O)(OCC)OCC)O)O)CC)OC)C(=O)OC)O.OS(=O)(=O)O	0.1
280	CC1=NNC(=O)N(C1)/N=C/C2=CN=CC=C2	0.9946
281	C1=NC2=C(N=C(N=C2N1[C@H]3[C@H]([C@@H]([C@H](O3)CO)O)F)Cl)N	0.53
282	COC1=CC(=NC(=N1)SC2=C(C(=CC=C2)Cl)C(=O)[O-])OC.[Na+]	0.0334
283	CCN(C)C(=O)OC1=CC=CC(=C1)[C@H](C)N(C)C	0.6
284	C1COCCO1	0.9398
285	CC[C@@]1(C2=C(COC1=O)C(=O)N3CC4=CC5=C(C=CC(=C5CN(C)C)O)N=C4C3=C2)O	0.65
286	CCCCCCCC(=O)O	0
287	CCCCCCCCCC	0.06697
288	C1CCCC(CC1)NC(P(=O)(O)O)P(=O)(O)O	0.9
289	CN([C@H]1CC[C@@]2(CCCO2)C[C@@H]1N3CCCC3)C(=O)CC4=C5C=COC5=CC=C4	0.263
290	C1=CC(=CC=C1OC2=C3C(=CC(=CC3=NC=C2)Cl)Cl)F	0
291	CCNC(=NCCCC[C@H](C(=O)N[C@@H](CC(C)C)C(=O)N[C@@H](CCCCN=C(NCC)NCC)C(=O)N1CCC[C@H]1C(=O)N[C@H](C)C(=O)N)NC(=O)[C@H](CC2=CC=C(C=C2)O)NC(=O)[C@H](CO)NC(=O)[C@@H](CC3=CN=CC=C3)NC(=O)[C@@H](CC4=CC=C(C=C4)Cl)NC(=O)[C@@H](CC5=CC6=CC=CC=C6C=C5)NC(=O)C)NCC	0.18
292	CC1=CC(=C(C=C1)O)[C@H](CCN(C(C)C)C(C)C)C2=CC=CC=C2	0.037
293	C[C@]12C[C@@H]([C@]3([C@H]([C@@H]1C[C@H]([C@@]2(C(=O)CO)O)O)CCC4=CC(=O)C=C[C@@]43C)F)O	0.7348
294	C1=CC=C2C(=C1)C(C(=O)N2)(C3=CC=C(C=C3)O)C4=CC=C(C=C4)O	0.0266
295	CC(C)C1CCC(C1(CN2C=NC=N2)O)CC3=CC=C(C=C3)Cl	0.0132
296	CC1=CC(=C(C=C1O)C)C2(C3=CC=CC=C3S(=O)(=O)O2)C4=C(C=C(C(=C4)C)O)C	0.0261
297	COC1=CC(=NC(=N1)OC2=C(C(=CC=C2)OC3=NC(=CC(=N3)OC)OC)C(=O)[O-])OC.[Na+]	0.0106
298	C/C(=C\C1=CC=C(C=C1)OCCN2CCOCC2)/C3=CC4=C(C=C3)C(CCC4(C)C)(C)C	0
299	CCC1=CC2=C(C=C1N3CCC(CC3)N4CCOCC4)C(C5=C(C2=O)C6=C(N5)C=C(C=C6)C#N)(C)C	0.003
300	CN1CC[C@@]23CCCC[C@@H]2[C@@H]1CC4=C3C=C(C=C4)OC	0.45
301	CC(C)[C@@H](C(=O)N1CCC[C@H]1C(=O)NC2=CC=C(C=C2)[C@@H]3CC[C@H](N3C4=CC=C(C=C4)C(C)(C)C)C5=CC=C(C=C5)NC(=O)[C@@H]6CCCN6C(=O)[C@H](C(C)C)NC(=O)OC)NC(=O)OC	0.001
302	CCC1(CCC(=O)NC1=O)C2=CC=C(C=C2)N	0.563
303	CC(CCC(=O)O)(C1=CC=C(C=C1)O)C2=CC=C(C=C2)O	0.163
304	CC1=C2C(=CC(=C1C(=O)O)O)C(=O)C3=C(C2=O)C(=C(C(=C3O)O)[C@H]4[C@@H]([C@H]([C@@H]([C@H](O4)CO)O)O)O)O	3.85e-08
305	CC(C)(C)S(=O)(=O)C[C@@H](CC1=CC=CC=C1)C(=O)N[C@@H](CC2=CN=CN2)C(=O)N[C@@H](CC3CCCCC3)[C@H]([C@H](C4CC4)O)O	0.05581
306	CC1=C(C(=CC=C1)C(=O)OC)S(=O)(=O)NC(=O)NC2=NC(=NC(=N2)OCC(F)(F)F)N(C)C	0.3292
307	C(C(CBr)Br)OP(=O)(OCC(CBr)Br)OCC(CBr)Br	0.00703
308	CCCCOP(=O)(OCCCC)OCCCC	0.03481
309	CC1(CCCCC1)C(=O)NC2=C(C(=C(C=C2)O)Cl)Cl	0.05719
310	C[C@H]1COC2=C3N1C=C(C(=O)C3=CC(=C2C4(CC4)N)F)C(=O)O	0.79
311	C(=O)(N)NO	1.05e-05
312	C(=C(Cl)Cl)(Cl)Cl	0.2463
313	C1CC12CN(C[C@H]2N)C3=C(C=C4C(=C3Cl)N(C=C(C4=O)C(=O)O)[C@@H]5C[C@@H]5F)F	0.51
314	C1C[C@H](CN(C1)CCC2=CC3=C(C=C2)OCO3)OC(C4=CC=CC=C4)C5=CC=CC=C5	0.002114
315	CN(C)[C@H]1[C@@H]2C[C@@H]3[C@@H](C4=C(C=CC(=C4C(=C3C(=O)[C@@]2(C(=C(C1=O)C(=O)N)O)O)O)O)Cl)O	0.59
316	CN(CC(=O)NO)C(=O)[C@@H]1CCCC[C@@H]1C(=O)O	1
317	CC1(C(=O)N(C(=O)O1)C)C	0.89
318	CC1=CCCC(C1/C=C(\C)/C(=O)C)(C)C	0.006334
319	CC1=C(ON=C1C)NS(=O)(=O)C2=CC=C(C=C2)N	0.079
320	CC(C)(C)NC(=O)[C@@H]1C[C@@H]2CCCC[C@@H]2CN1C[C@H]([C@H](CC3=CC=CC=C3)NC(=O)[C@H](CC(=O)N)NC(=O)C4=NC5=CC=CC=C5C=C4)O	0.028
321	CC(=O)[C@H]1CC[C@@H]2[C@@]1(CC[C@H]3[C@H]2CC[C@H]4[C@@]3(CC[C@H](C4)O)C)C	0.01
322	CC[C@H](C)[C@@H](C(=O)N1CCC[C@H]1C(=O)N[C@@H](CCC(=O)O)C(=O)N[C@@H](CCC(=O)O)C(=O)N[C@@H](CC2=CC=C(C=C2)O)C(=O)N[C@@H](CC(C)C)C(=O)O)NC(=O)[C@H](CCC(=O)O)NC(=O)[C@H](CCC(=O)O)NC(=O)[C@H](CC3=CC=CC=C3)NC(=O)[C@H](CC(=O)O)NC(=O)CNC(=O)[C@H](CC(=O)N)NC(=O)CNC(=O)CNC(=O)CNC(=O)CNC(=O)[C@@H]4CCCN4C(=O)[C@H](CCCNC(=N)N)NC(=O)[C@@H]5CCCN5C(=O)[C@@H](CC6=CC=CC=C6)N	1
323	CC(C)(C)C1=C(C(=CC=C1)C(C)(C)C)O	0.01953
324	C/C=C\1/C(=O)N[C@H](C(=O)O[C@H]\2CC(=O)N[C@@H](C(=O)N[C@H](CSSCC/C=C2)C(=O)N1)C(C)C)C(C)C	0.07
325	C1=CC2=C3C(=C1)C=CC4=CC=CC(=C43)C=C2	0.02415
326	CC1=C2CCC(C(=O)N2C3=CC=CC=C13)CC4=C(NC=N4)C	0.016
327	CC1=C2CC[C@@H](C(=O)N2C3=CC=CC=C13)CC4=C(NC=N4)C.Cl	0.0309
328	C[C@]12CC[C@H]3[C@H]([C@@H]1CC[C@@H]2O)[C@@H](CC4=C3C=CC(=C4)O)CCCCCCCCCS(=O)CCCC(C(F)(F)F)(F)F	0.00264
329	CC1=C2C(=NC=C1)N(C3=C(C=CC=N3)C(=O)N2)C4CC4	0.32
330	CCOC(=O)COC1=C(C=C(C(=C1)C2=NN(C(=C2Cl)OC(F)F)C)F)Cl	0.435
331	C1CC(=O)NC2=C1C=CC(=C2)OCCCCN3CCN(CC3)C4=C(C(=CC=C4)Cl)Cl	0.01
332	CN(C)C1=CC=C(C=C1)C(C2=CC=CC=C2)C3=CC=C(C=C3)N(C)C	2e-08
333	C1=CC=C2C(=C1)C(=O)C3=CC(=C4C(=C3C2=O)NC5=C(C=C6C(=C5N4)C(=O)C7=CC=CC=C7C6=O)Cl)Cl	1
334	CC(C)OC(=O)CCC/C=C\C[C@H]1[C@H](C[C@H]([C@@H]1CC[C@H](CCC2=CC=CC=C2)O)O)O	0.1
335	CN1C(=CC(=O)N(C1=O)C)NCCN(CCCC2=CC=C(C=C2)[N+](=O)[O-])CCO	0.09
336	CCOP(=S)(OCC)SCSC(C)(C)C	0.0306
337	CC(C)(C1=CC=C(C=C1)OC2=CC=C(C=C2)N)C3=CC=C(C=C3)OC4=CC=C(C=C4)N	2.48e-08
338	CCN(CC)C(=O)/C(=C/C1=CC(=C(C(=C1)O)O)[N+](=O)[O-])/C#N	0.02
339	COC1=CC2=C(C=CN=C2C=C1)[C@H]([C@@H]3C[C@@H]4CCN3C[C@@H]4C=C)O	0.3
340	COCCNC(=O)CN(CCN(CCN(CC(=O)NCCOC)CC(=O)[O-])CC(=O)[O-])CC(=O)[O-].[Gd+3]	1
341	COC(=O)C1=CC=CC=C1C(=O)OC	0.656
342	C=CCOC(=O)C1=CC=CC=C1C(=O)OCC=C	0.9621
343	CCCCCOC(=O)C1=CC=CC=C1C(=O)OCCCCC	0.0986
344	C1=CC(=C2C(=C1)OC(O2)(F)F)C3=CNC=C3C#N	0.003583
345	CC[C@H](C)[C@@H](C(=O)N[C@@H](CC1=CC=CC=C1)C(=O)N[C@@H]([C@@H](C)O)C(=O)N[C@@H](CC2=CC=C(C=C2)O)C(=O)NCC(=O)N[C@@H](CCC(=O)O)C(=O)N[C@@H](CC(C)C)C(=O)N[C@@H](CCC(=O)N)C(=O)N[C@@H](CCCNC(=N)N)C(=O)N[C@@H](CC(C)C)C(=O)N[C@@H](CCC(=O)N)C(=O)N[C@@H](CCC(=O)O)C(=O)N[C@@H](CCCCN)C(=O)N[C@@H](CCC(=O)O)C(=O)N[C@@H](CCCNC(=N)N)C(=O)N[C@@H](CC(=O)N)C(=O)N[C@@H](CCCCN)C(=O)NCC(=O)N[C@@H](CCC(=O)N)C(=O)N[C@@…	0.03
346	C1=CC(=C(C=C1O)O)C(=O)C2=C(C=C(C=C2)O)O	0.0354
347	C1=CC=C(C=C1)C(=O)C2=C(C=C(C=C2)O)O	0.0113
348	COC1=CC(=C(C=C1)C(=O)C2=CC=CC=C2)O	0.00952
349	CCCCOC(=O)C1=CC=CC=C1C(=O)O	0.2077
350	CC1(C(=O)N(C(=O)O1)NC2=CC=CC=C2)C3=CC=C(C=C3)OC4=CC=CC=C4	0.0097
351	CO/C=C(\C1=CC=CC=C1OC2=NC=NC(=C2)OC3=CC=CC=C3C#N)/C(=O)OC	0.04763
352	C[C@H](/C=C/[C@H](C)C(C)(C)O)[C@H]1CC[C@@H]\2[C@@]1(CCC/C2=C\C=C3C[C@H](C[C@@H](C3)O)O)C	0.0016
353	CCCSP(=O)(OCC)SCCC	0.09346
354	CC1(CC/C(=C\C2=CC=C(C=C2)Cl)/C1(CN3C=NC=N3)O)C	0.1373
355	C#CC[C@@H](CC1=CN=C2C(=N1)C(=NC(=N2)N)N)C3=CC=C(C=C3)C(=O)N[C@@H](CCC(=O)O)C(=O)O	0.33
356	C#CC[C@H](CC1=CN=C2C(=N1)C(=NC(=N2)N)N)C3=CC=C(C=C3)C(=O)N[C@@H](CCC(=O)O)C(=O)O	0.33
357	CN(C)CCC(C1=CC=C(C=C1)Cl)C2=CC=CC=N2	0.7
358	C1=CC=C2C(=C1)C3=CC=CC=C3O2	0
359	C(CCl)NP(=O)(NCCCl)O[C@H]1[C@@H]([C@H]([C@@H]([C@H](O1)CO)O)O)O	0.71
360	CCC(=O)N(C1=CC=CC=C1)C2(CCN(CC2)CCC(=O)OC)C(=O)OC	0.3
361	C[C@H]1/C=C/C=C(\C(=O)NC2=C(C(=C3C(=C2O)C(=C(C4=C3C(=O)[C@](O4)(O/C=C/[C@@H]([C@H]([C@H]([C@@H]([C@@H]([C@@H]([C@H]1O)C)O)C)OC(=O)C)C)OC)C)C)O)O)/C=N/N5CCN(CC5)C)/C	0.04344
362	CCN(CCC#N)C1=CC=C(C=C1)N=NC2=C(C=C(C=C2Cl)[N+](=O)[O-])Cl	0.00145
363	CCCCC1=NC=C(N1CC2=CC=C(C=C2)C(=O)O)/C=C(\CC3=CC=CS3)/C(=O)O	0.017
364	C1=CC=C2C(=C1)C(=O)N(C2=O)SC(Cl)(Cl)Cl	2.99e-06
365	C1CN(C[C@@H]1C(C2=CC=CC=C2)(C3=CC=CC=C3)C(=O)N)CCC4=CC5=C(C=C4)OCC5	0.02
366	CC(C)C(=O)NC1=CC(=C(C=C1)[N+](=O)[O-])C(F)(F)F	0.03758
367	C1=CC(=CN=C1)CC2=CNC3=C2N=C(NC3=O)N	0.86
368	C[N@+]1(CCC2=CC(=C(C(=C2[C@H]1CC3=CC(=C(C(=C3)OC)OC)OC)OC)OC)OC)CCCOC(=O)CCC(=O)OCCC[N@+]4(CCC5=CC(=C(C(=C5[C@@H]4CC6=CC(=C(C(=C6)OC)OC)OC)OC)OC)OC)C	0.53
369	C1=CC=C(C(=C1)[C@@H]2[C@@](O2)(CN3C=NC=N3)C4=CC=C(C=C4)F)Cl	0.0575
370	CC(CC1=CC=C(C=C1)O)NCC(C2=CC(=CC(=C2)O)O)O	0.53
371	COC(=O)C1=CC=CC=C1N	0.224
372	CC(C)OC1=CC=CC=C1N2CCN(CC2)CC3=CC(=CC=C3)C(=O)N4CCCCC4	0.011
373	C[C@@H]([C@H](C1=CC=C(C=C1)O)O)N2CCC(CC2)(C3=CC=CC=C3)O	0.63
374	CC1=CC=C(C=C1)C(=O)C2=CC(=C(C(=C2)O)O)[N+](=O)[O-]	0.0133
375	CC(C)C1=C(C(=C(N1CC[C@H](C[C@H](CC(=O)O)O)O)C2=CC=C(C=C2)F)C3=CC=CC=C3)C(=O)NC4=CC=CC=C4	0.02
376	CCN(CC)C(=O)C1=CC=CC(=C1)C	0.3559
377	C1[C@H](O[C@H](S1)CO)N2C=CC(=NC2=O)N	0.94
378	CC1=CC=C(C=C1)C(=O)C2=CC=CC=C2	0.0188
379	CCOC1=C(C=CC(=C1)CC(=O)N[C@@H](CC(C)C)C2=CC=CC=C2N3CCCCC3)C(=O)O	0.015
380	CSC(=O)C1=C2C(=CC=C1)N=NS2	0.0232
381	C1=CC=C2C=C(C=CC2=C1)O	6.98e-07
382	CC(C)NCC(COC1=CC=CC2=C1C=CN2)O	0.58
383	CCCC1C(=O)N2C3=C(C=CC(=C3)C)N=C(N2C1=O)N(C)C	0.004
384	CC(=NC#N)N(C)CC1=CN=C(C=C1)Cl	0.5732
385	B1([C@H](CC[C@H](O1)CC(=O)O)NC(=O)CC2=CC=CS2)O	0.67
386	CN(C)[C@H]1[C@@H]2C[C@@H]3CC4=C(C=CC(=C4C(=C3C(=O)[C@@]2(C(=C(C1=O)C(=O)N)O)O)O)O)N(C)C.Cl	0.276
387	CCCOC(=O)C1=CN=C(C=C1)C(=O)OCCC	0.865
388	C1CC1NC2=C3C(=NC(=N2)N)N(C=N3)[C@@H]4C[C@@H](C=C4)CO	0.5
389	CC(C)NCC(COC1=CC=CC=C1CC=C)O	1
390	CCCCOC(=O)C1=CC=CC=C1	0.313
391	C(C(CCl)OP(=O)(OC(CCl)CCl)OC(CCl)CCl)Cl	0.01078
392	CCC1=CC(=CC(=C1N)CC)CC2=CC(=C(C(=C2)CC)N)CC	0.00874
393	CC1=C(C=CC=C1Cl)NC2=CC=CC=C2C(=O)O	0.003
394	C[C@@H](C1=NC=NC=C1F)[C@](CN2C=NC=N2)(C3=C(C=C(C=C3)F)F)O	0.42
395	CN(C)C(=S)SSC(=S)N(C)C	3.86e-08
396	C1=CC(=CC=C1CCC2=CNC3=C2C(=O)NC(=N3)N)C(=O)N[C@@H](CCC(=O)O)C(=O)O	0.19
397	CCN(CC)CC(=O)NC1=C(C=CC=C1C)C	0.296
398	CCCCC(=O)N(CC1=CC=C(C=C1)C2=CC=CC=C2C3=NNN=N3)[C@@H](C(C)C)C(=O)O	0.04
399	C1CN(/C(=N/[N+](=O)[O-])/N1)CC2=CN=C(C=C2)Cl	0.6559
400	CCCCC1=NC2(CCCC2)C(=O)N1CC3=CC=C(C=C3)C4=CC=CC=C4C5=NNN=N5	0.1
401	CC/C(=C\C(=N/O)\C(=O)N)/C(C)[N+](=O)[O-]	3.07e-06
402	CC(=O)N[C@@H]1[C@H](C=C(O[C@H]1[C@@H]([C@@H](CO)O)O)C(=O)O)N=C(N)N	0.86
403	CN(C)CCC1=CNC2=C1C=C(C=C2)C[C@H]3COC(=O)N3	0.75
404	COC1=CC=CC(=C1OC)[C@@H](C2CCN(CC2)CCC3=CC=C(C=C3)F)O	0.5097
405	CC(C)(C)C1=CC(=CC(=C1O)C(C)(C)C)/C=C\2/C(=O)N=C(S2)N.CS(=O)(=O)O	0.00678
406	CC(C)NC1=NC(=NC(=N1)Cl)NC(C)C	0.03651
407	CCOC1=NC2=CC=CC(=C2N1CC3=CC=C(C=C3)C4=CC=CC=C4C5=NNN=N5)C(=O)O	0.002
408	CCCC1=NN(C2=C1N=C(NC2=O)C3=C(C=CC(=C3)S(=O)(=O)N4CCN(CC4)C)OCC)C	0.04
409	C[C@H]1/C=C/C=C/C=C/C=C/C=C/C=C/C=C/[C@@H](C[C@H]2[C@@H]([C@H](C[C@](O2)(C[C@H](C[C@H]([C@@H](CC[C@H](C[C@H](CC(=O)O[C@H]([C@@H]([C@@H]1O)C)C)O)O)O)O)O)O)O)C(=O)O)O[C@H]3[C@H]([C@H]([C@@H]([C@H](O3)C)O)N)O	0.03
410	CCOC1=C(C=C(C=C1)/C=C\2/C3=CC(=C(C=C3CCN2)OCC)OCC)OCC	0.12
411	C1=CC=C(C=C1)/C=C/C(=O)O	0.0499
412	C1=C(C=C(C(=C1O)O)O)C(=O)OC2=CC(=CC(=C2O)O)C(=O)OC[C@@H]3[C@H]([C@@H]([C@H]([C@@H](O3)OC(=O)C4=CC(=C(C(=C4)OC(=O)C5=CC(=C(C(=C5)O)O)O)O)O)OC(=O)C6=CC(=C(C(=C6)OC(=O)C7=CC(=C(C(=C7)O)O)O)O)O)OC(=O)C8=CC(=C(C(=C8)OC(=O)C9=CC(=C(C(=C9)O)O)O)O)O)OC(=O)C1=CC(=C(C(=C1)OC(=O)C1=CC(=C(C(=C1)O)O)O)O)O	1
413	CC(C1CCC(C(O1)OC2C(CC(C(C2O)OC3C(C(C(CO3)(C)O)NC)O)N)N)N)NC	1
414	C[C@H]1[C@H]([C@@](C[C@@H](O1)O[C@@H]2[C@H]([C@@H]([C@H](O[C@H]2OC3=C4C=C5C=C3OC6=C(C=C(C=C6)[C@H]([C@H](C(=O)N[C@H](C(=O)N[C@H]5C(=O)N[C@@H]7C8=CC(=C(C=C8)O)C9=C(C=C(C=C9O)O)[C@H](NC(=O)[C@H]([C@@H](C1=CC(=C(O4)C=C1)Cl)O)NC7=O)C(=O)O)CC(=O)N)NC(=O)[C@@H](CC(C)C)NC)O)Cl)CO)O)O)(C)N)O	0.7
415	CC(C)(C)CC(C)(C)C1=CC=C(C=C1)O	0.01902
416	CS(=O)(=O)C1=C(C=CC(=C1)C(F)(F)F)C(=O)C2=C(ON=C2)C3CC3	0.01655
417	C[C@@H]1CC(=O)NN=C1C2=CC=C(C=C2)NN=C(C#N)C#N	0.02
418	C/C(=N\OCC1=CC=CC=C1/C(=N\OC)/C(=O)OC)/C2=CC(=CC=C2)C(F)(F)F	0.0072
419	CCCCC1=C(C2=C(O1)C=CC(=C2)NS(=O)(=O)C)C(=O)C3=CC=C(C=C3)OCCCN(CCCC)CCCC	0.02
420	C/C(=C\C(=O)N(C)C)/OP(=O)(OC)OC	0.8457
421	CC(C)C(=O)OCC(=O)[C@@]12[C@@H](C[C@@H]3[C@@]1(C[C@@H]([C@H]4[C@H]3CCC5=CC(=O)C=C[C@]45C)O)C)O[C@H](O2)C6CCCCC6	0.01
422	CC(C)NC1=C2C(=C(C=C1)NC(C)C)C(=O)C3=CC=CC=C3C2=O	0.00728
423	CCCCS(=O)(=O)N[C@@H](CC1=CC=C(C=C1)OCCCCC2CCNCC2)C(=O)O.Cl	0.36
424	CC(C)N(C1=CC=C(C=C1)F)C(=O)COC2=NN=C(S2)C(F)(F)F	0.1375
425	C[C@H](/C=C/C=C(/C)\[C@H]1CN[C@@H]([C@H]1CC(=O)O)C(=O)O)C(=O)O	0.92
426	CN1CCC[C@@H]1CC2=CNC3=C2C=C(C=C3)CCS(=O)(=O)C4=CC=CC=C4	0.15
427	CC[C@H]1CN2CC[C@H]1C[C@@H]2[C@H](C3=C4C=C(C=CC4=NC=C3)OC)O	0.22
428	CC(=O)O[C@H]1[C@H](C[C@@H]2[C@@]1(CC[C@H]3[C@H]2CC[C@@H]4[C@@]3(C[C@@H]([C@H](C4)O)N5CCOCC5)C)C)[N+]6(CCCC6)CC=C	0.54
429	C1=CC=C2C(=C1)C(OS2(=O)=O)(C3=CC=C(C=C3)O)C4=CC=C(C=C4)O	0.142
430	CN(C)CCC1=CNC2=C1C=C(C=C2)CN3C=NC=N3	0.86
431	C1CN(CCC1OCC(=O)O)C(=O)[C@H](CC2=CC=C(C=C2)O)NC(=O)C3=CC=C(C=C3)C(=N)N	0.94
432	CC1=NC(=NC(=N1)OC)NC(=O)[N-]S(=O)(=O)C2=C(C=CC(=C2)I)C(=O)OC.[Na+]	0.006681
433	CC(C)OP(=O)(C)OC(C)C	0.9727
434	CC1=C(C(=O)N2CCCC(C2=N1)O)CCN3CCC(CC3)C4=NOC5=C4C=CC(=C5)F	0.24
435	CC1=CC(=NC(=N1)NC(=O)NS(=O)(=O)C2=CC=CC=C2C(=O)OC3COC3)C	0.06084
436	CN(C1CCN(CC1)C[C@@H](COC2=CC(=C(C=C2)F)F)O)C3=NC4=CC=CC=C4S3	0.003
437	CCCC1=NC2=C(N1CC3=CC=C(C=C3)C4=CC=CC=C4C(=O)O)C=C(C=C2C)C5=NC6=CC=CC=C6N5C	0.004
438	CC1=C(C(=CC=C1)[C@H](C)C2=CN=CN2)C.Cl	0.06
439	CCCCCN=C(N)N/N=C/C1=CNC2=C1C=C(C=C2)OC	0.02
440	CC(C)(CC(=O)N[C@@H]1CCC2=CC=CC=C2N(C1=O)CC3=CC=C(C=C3)C4=CC=CC=C4C5=NNN=N5)N	0.06
441	CC(C)C1=C(C(=C(C(=N1)C(C)C)COC)C2=CC=C(C=C2)F)/C=C/[C@H](C[C@H](CC(=O)O)O)O	0.01
442	CC1=C(C=C(C=C1)C(=O)NC2=C3C(=CC(=CC3=C(C=C2)S(=O)(=O)O)S(=O)(=O)O)S(=O)(=O)O)NC(=O)C4=CC(=CC=C4)NC(=O)NC5=CC=CC(=C5)C(=O)NC6=C(C=CC(=C6)C(=O)NC7=C8C(=CC(=CC8=C(C=C7)S(=O)(=O)O)S(=O)(=O)O)S(=O)(=O)O)C	0.003
443	CCOC1=NC(=CC2=NC(=NN21)S(=O)(=O)NC3=C(C=CC=C3Cl)Cl)F	0.00648
444	C1CC2C(C(C1O2)C(=O)O)C(=O)O	0.867
445	COC1=C(C=C(C=C1)OC(F)(F)F)CN[C@H]2CCCN[C@H]2C3=CC=CC=C3	0.07996
446	C1C(=O)NC2=C(C=C(C=C2)[N+](=O)[O-])C(=N1)C3=CC=CC=C3	0.13
447	CN1CC[C@@H]([C@@H](C1)O)C2=C(C=C(C3=C2OC(=CC3=O)C4=CC=CC=C4Cl)O)O	0.06
448	COC(=O)[C@H]1[C@H](CC[C@@H]2[C@@H]1C[C@H]3C4=C(CCN3C2)C5=CC=CC=C5N4)O	0.2
449	C1CN(CCN1CCC2=C(C=C3C(=C2)CC(=O)N3)Cl)C4=NSC5=CC=CC=C54	0.0012
450	C1[C@@H]2[C@@H](C2N)CN1C3=C(C=C4C(=O)C(=CN(C4=N3)C5=C(C=C(C=C5)F)F)C(=O)O)F	0.24
451	C1=CC(=CC=C1C(=O)C2=C(C=C(C=C2)O)O)O	0.0196
452	C[C@H](CN1C=NC2=C(N=CN=C21)N)OCP(=O)(O)O	0.93
453	CN(C)CCOC(C1=CC=CC=C1)C2=CC=CC=C2.Cl	0.4131
454	C1CC1C2=NC3=CC=CC=C3C(=C2/C=C/[C@H](C[C@H](CC(=O)O)O)O)C4=CC=C(C=C4)F	0.005
455	CCOC1=C(C2=CC=CC=C2C=C1)C(=O)N[C@H]3[C@@H]4N(C3=O)[C@H](C(S4)(C)C)C(=O)O	0.13
456	CC(C)(C)C1=CC=C(C=C1)S(=O)(=O)NC2=C(C(=NC(=N2)C3=NC=CC=N3)OCCO)OC4=CC=CC=C4OC	0.02
457	CC(C(=O)N[C@H]1[C@@H]2N(C1=O)[C@H](C(S2)(C)C)C(=O)O)OC3=CC=CC=C3	0.25
458	CC[C@@H](C(C[C@H](C)N(C)C)(C1=CC=CC=C1)C2=CC=CC=C2)OC(=O)C	0.2
459	C1=CC(=CC=C1C(C2=CC=C(C=C2)O)(C(F)(F)F)C(F)(F)F)O	0.00685
460	C1=CN(C(=O)N=C1N)[C@H]2[C@H]([C@@H]([C@H](O2)CO)O)O	0.87
461	C[C@@H]1[C@@H]2[C@H](C(=O)N2C(=C1S[C@H]3C[C@H](NC3)CNS(=O)(=O)N)C(=O)O)[C@@H](C)O	0.92
462	C1=CC2=C(C(=C1)O)N=CC=C2	0.1184
463	C1=CC=C2C(=C1)NC(=N2)C3=CSC=N3	0.1382
464	C1=CC(=CC=C1C[C@@H](C(=O)O)N)N(CCCl)CCCl	0.14
465	C1=CC=C2C(=C1)NC(=S)S2	0.0215
466	CC1=C(N=CC=C1)NS(=O)(=O)C2=CC=C(C=C2)C#CC3=CC(=C(C=C3)O)C(=O)O	0.0019
467	CCCCC(CC)C(=O)O	0.1316
468	C1=CC=C(C=C1)NC(=O)CCCCCCC(=O)NO	0.29
469	CC(C)OC(=O)NNC1=C(C=CC(=C1)C2=CC=CC=C2)OC	0.836
470	CN1CCN(CC1)CCCCN2C(=O)CN(C2=O)/N=C/C3=CC=C(O3)C4=CC=C(C=C4)Cl	0.06
471	CC/C(=N\OC/C=C/Cl)/C1=C(CC(CC1=O)C2CCOCC2)O	0.3834
472	C1=CC(=CC=C1C(=O)O)N	0.766
473	CC(C)(C)NC(=O)[C@@H]1CN(CCN1C[C@H](C[C@@H](CC2=CC=CC=C2)C(=O)N[C@@H]3[C@@H](CC4=CC=CC=C34)O)O)CC5=CN=CC=C5	0.3
474	C1CN2C(=O)[C@H](N=C(C3=CC=CC1=C32)C4=CC=CC=C4F)NC(=O)C5=CC6=CC=CC=C6N5	0.005
475	CC1=CC=CC=C1C(=O)NC2=CC(=C(C=C2)C(=O)N3CCCC(C4=C3C=CC(=C4)Cl)O)C	0.01
476	CN(C)C(=O)NC1=CC=C(C=C1)Cl	0.4551
477	CCOC(=O)NC1=C(C=C(C=C1)NCC2=CC=C(C=C2)F)N	0.2
478	C1=CC=C2C(=C1)C(=O)OC23C4=CC(=C(C(=C4OC5=C(C(=C(C=C35)Br)O)Br)Br)O)Br	0.003
479	COC1=C2C(=CC(=C1N3C[C@@H]4CCCN[C@@H]4C3)F)C(=O)C(=CN2C5CC5)C(=O)O	0.6
481	CCN(C1=CC=CC(=C1)C2=CC=NC3=C(C=NN23)C#N)C(=O)C	0.4
483	COC1=C(C=CC(=C1)F)CN2C=CC3=C4CCN(C(=O)C4=NC=C32)O	0.08
484	CCC#CC(C)C1(C(=O)NC(=O)N(C1=O)C)CC=C	0.27
485	C[C@H]1CCC[C@@]2([C@@H](O2)C[C@H](OC(=O)C[C@@H](C(C(=O)[C@@H]([C@H]1O)C)(C)C)O)/C(=C/C3=CSC(=N3)C)/C)C	0.22
486	CC1=C(C=C(C=C1)NC(=O)C2=CC=C(C=C2)CN3CCN(CC3)C)NC4=NC=CC(=N4)C5=CN=CC=C5	0.05
487	CC(=O)CC(C1=CC=C(C=C1)[N+](=O)[O-])C2=C(C3=CC=CC=C3OC2=O)O	0.02
488	CC1C(=O)OC2C1(C34C(=O)OC5C3(C2O)C6(C(C5)C(C)(C)C)C(C(=O)OC6O4)O)O	0.8
489	C[C@@H]1C[C@H]2[C@@H]3C[C@@H](C4=CC(=O)C=C[C@@]4([C@H]3[C@H](C[C@@]2([C@H]1C(=O)CO)C)O)C)F	0.04
490	CCN(CC)C(=O)C(C)OC1=CC=CC2=CC=CC=C21	0
491	C1=CC=C(C(=C1)CC(=O)[O-])NC2=C(C=CC=C2Cl)Cl.[Na+]	0.004131
492	C1=CC=C(C(=C1)CC(=O)O)NC2=C(C=CC=C2Cl)Cl	0.005
493	C1=CC=C(C=C1)NC(=O)C2=CC=CC=C2I	0.07513
494	CCOC1=C(C=CC(=C1)C(C)(C)C)C2COC(=N2)C3=C(C=CC=C3F)F	0
495	COC1=C(C=C(C=C1)C2(CCC(CC2)C(=O)O)C#N)OC3CCCC3	0.006
496	C1=CC=C(C=C1)NC(=O)/C=C/C2=C(NC3=C2C(=CC(=C3)Cl)Cl)C(=O)O	0.002
497	CC1=CC2=C(C=C1CN(CC#C)C3=CC(=C(C=C3)C(=O)N[C@@H](CCC4=NNN=N4)C(=O)O)F)C(=O)NC(=N2)C	0.01
498	CC(=O)OCC1=C(N2[C@@H]([C@@H](C2=O)NC(=O)CC3=CC=CS3)SC1)C(=O)O	0.22
499	CN\1COCN(/C1=N/[N+](=O)[O-])CC2=CN=C(S2)Cl	0.8286
500	C[C@@H]1[C@@H]2[C@H](C(=O)N2C(=C1S[C@H]3C[C@H](NC3)C(=O)NC4=CC=CC(=C4)C(=O)O)C(=O)O)[C@@H](C)O	0.1
501	CN(C)CCC1=CNC2=C1C=C(C=C2)CS(=O)(=O)N3CCCC3	0.6
502	C1C[C@H](CN(C1)C(=N)N)CNC(=O)C[C@@H](C(=O)N(CC(=O)O)C2CC2)NS(=O)(=O)C3=CC4=CC=CC=C4C=C3	0.55
503	C1=NC2=C(N1)C(=S)N=C(N2)N	0.804
504	C(CCl)NC(=O)N(CCCl)N=O	0.23
505	CC(=O)O[C@H]1C[C@@H]2CC[C@@H]3[C@@H]([C@]2(C[C@@H]1[N+]4(CCCCC4)C)C)CC[C@]5([C@H]3C[C@@H]([C@@H]5OC(=O)C)[N+]6(CCCCC6)C)C.[Br-].[Br-]	0.09
506	CCNC(=O)CCC/C=C\C[C@H]1[C@H](C[C@H]([C@@H]1/C=C/[C@H](CCC2=CC=CC=C2)O)O)O	0.12
507	CC(C)C1=NC(=CS1)CN(C)C(=O)N[C@@H](C(C)C)C(=O)N[C@@H](CC2=CC=CC=C2)C[C@@H]([C@H](CC3=CC=CC=C3)NC(=O)OCC4=CN=CS4)O	0.015
508	C1CCC(CC1)C[C@H](C(=O)N2CCCC[C@H]2C(=O)NCCCN=C(N)N)NCC(=O)O	0.76
509	CC[C@H](C)[C@@H]1[C@H](C=C[C@@]2(O1)C[C@@H]3C[C@H](O2)C/C=C(/[C@H]([C@H](/C=C/C=C/4\CO[C@H]5[C@@]4([C@@H](C=C([C@H]5O)C)C(=O)O3)O)C)O[C@H]6C[C@@H]([C@H]([C@@H](O6)C)O[C@H]7C[C@@H]([C@H]([C@@H](O7)C)NC)OC)OC)\C)C.C1=CC=C(C=C1)C(=O)O	0.001379
510	CN(CCCN1CCC2=CC(=C(C=C2CC1=O)OC)OC)C[C@H]3CC4=CC(=C(C=C34)OC)OC	0.28
511	C[N+]1=CC=CC(=C1)OC(=O)N(C)C	1
512	CCC(C)(C(=O)CCl)NC(=O)C1=CC(=C(C(=C1)Cl)C)Cl	0.01031
513	C[C@H]1CN(CC[C@@]1(C)C2=CC(=CC=C2)O)C[C@H](CC3=CC=CC=C3)C(=O)NCC(=O)O	0.2
514	C1=CC=C(C=C1)NC2=CC=C(C=C2)N=O	0.123
515	C1=CC=C(C=C1)C[N+]2=CC=CC3=CC=CC=C32.[Cl-]	0.599
516	CC1(CC2=C(O1)C(=CC=C2)O)C	0.364
517	CC1(CC2=C(O1)C(=CC=C2)OC(=O)NC)C	0.4213
518	CCOC1=CC=C(C=C1)N	0.485
519	CCN1CCCC1CNC(=O)C2=C(C=CC(=C2)S(=O)(=O)N)OC	1
520	CC1=C(N2[C@@H]([C@@H](C2=O)NC(=O)[C@@H](C3=CC=CC=C3)N)SC1)C(=O)O	0.85
521	CC(C)CC1=CC=C(C=C1)C(C)C(=O)O	0.01
522	C1=CC(=C(C=C1N=NC2=CC(=C(C=C2)O)C(=O)O)C(=O)O)O	0.01
523	CC(C(=O)O)OC1=CC=C(C=C1)OC2=CN=C3C=CC(=CC3=N2)Cl	0.0036
524	CC(CC(C1=CC=CC=C1)C2=CC=CC=C2)NC(C)(C)C	0.08
525	CCCN(CCC)C1=C(C=C(C=C1[N+](=O)[O-])C(F)(F)F)[N+](=O)[O-]	0.00252
526	CN[C@@H]1CCC2=C(C1)C3=C(N2)C=CC(=C3)C(=O)N	0.85
527	CC(C)(C1=CC=CC=C1CC[C@H](C2=CC=CC(=C2)/C=C/C3=NC4=C(C=CC(=C4)Cl)C=C3)SCC5(CC5)CC(=O)O)O	0.002
528	CC(C)C1=C(C=C(C=C1)C(=O)N=C(N)N)S(=O)(=O)C.CS(=O)(=O)O	0.451
530	C1CC1[C@@]2(C3=CC=CC=C3NC(=O)N2)C#CC4=CC=CC=N4	1
531	CN(C)NC(=O)CCC(=O)O	0.939
532	CCC1=C(C(=CC=C1)CC)N(COC)C(=O)CCl	0.1332
533	C1CCC(CC1)[C@H](C(=O)N2CC[C@H]2C(=O)NCC3=CC=C(C=C3)C(=N)N)NCC(=O)O	0.93
534	C1[C@@H]([C@@H]2[C@H](O1)[C@@H](CO2)O[N+](=O)[O-])O	1
535	C[C@H](CC1=CC2=C(C(=C1)C(=O)N)N(CC2)CCCO)NCCOC3=CC=CC=C3OCC(F)(F)F	0.05
536	CC(C)NC1=NC(=NC(=N1)OC)NC(C)C	0.0289
537	CC1=CC(=CC(=C1)C(=O)N(C(C)(C)C)NC(=O)C2=C(C(=CC=C2)OC)C)C	0.06119
538	C[C@@]1(C(=O)N(C(=N1)SC)NC2=CC=CC=C2)C3=CC=CC=C3	0.02436
539	C\1CN(C(=O)/C1=C/C2=C(N3[C@@H]([C@@H](C3=O)NC(=O)/C(=N\O)/C4=CSC(=N4)N)SC2)C(=O)O)CC(F)(F)F	0.043
540	CS(=O)(=O)C1=CC=C(C=C1)C2=C(C(=O)OC2)C3=CC=CC=C3	0.13
541	C1C(=O)NC2=C(C=C(C=C2)[N+](=O)[O-])C(=N1)C3=CC=CC=C3Cl	0.21
542	CN1C(=O)CN=C(C2=C1C=CC(=C2)[N+](=O)[O-])C3=CC=CC=C3F	0.25
543	CCCCCCCCC1=CC=C(C=C1)CCC(CO)(CO)N	0.002
544	C1CC1COC2=C(C=CC(=C2)C(=O)NC3=C(C=NC=C3Cl)Cl)OC(F)F	0.01
545	CC[C@H](C)C[C@H](C)CCCCCCCCC(=O)N[C@H]1C[C@H]([C@H](NC(=O)[C@@H]2[C@H](CCN2C(=O)[C@@H](NC(=O)[C@@H](NC(=O)[C@@H]3C[C@H](CN3C(=O)[C@@H](NC1=O)[C@@H](C)O)O)[C@@H]([C@H](C4=CC=C(C=C4)O)O)O)[C@@H](CCN)O)O)NCCN)O	0.035
546	CC(C)(C)OC	0.905
547	C/C(=C(\C#N)/C(=O)NC1=CC=C(C=C1)C(F)(F)F)/O	0.01
548	CCOC(=O)CC(C(=O)OCC)SP(=O)(OC)OC	0.538
549	C1CN(CCN1CCCCC2=CNC3=C2C=C(C=C3)C#N)C4=CC5=C(C=C4)OC(=C5)C(=O)N	0.03
550	CSCCNC1=C2C(=NC(=N1)SCCC(F)(F)F)N(C=N2)[C@H]3[C@@H]([C@@H]([C@H](O3)COP(=O)(O)OP(=O)(C(P(=O)(O)O)(Cl)Cl)O)O)O	0.02
551	CCCCC1=CC=C(C=C1)O	0.0358
552	CCCC[N+](CCCC)(CCCC)CCCC.[Br-]	0.9242
553	CC(C)(/C=N/OC(=O)NC)S(=O)(=O)C	0.948
554	CN1C2=C(C=C(C=C2)N(CCCl)CCCl)N=C1CCCC(=O)O	0.05
555	C1=CC2=C(C(=C1)NS(=O)(=O)C3=CC=C(C=C3)S(=O)(=O)N)NC=C2Cl	0.001
556	CC(=O)NC[C@H]1CN(C(=O)O1)C2=CC(=C(C=C2)N3CCOCC3)F	0.69
557	C1CC1CN2CC[C@]34[C@@H]5C(=O)CC[C@]3([C@H]2CC6=C4C(=C(C=C6)O)O5)O	0.79
558	CC(C)C(CCCN(C)CCC1=CC(=C(C=C1)OC)OC)(C#N)C2=CC(=C(C(=C2)OC)OC)OC	0.07
559	CCCCCOC1=CC=C(C=C1)C2=CC=C(C=C2)C3=CC=C(C=C3)C(=O)N[C@H]4C[C@H]([C@H](NC(=O)[C@@H]5[C@H]([C@H](CN5C(=O)[C@@H](NC(=O)[C@@H](NC(=O)[C@@H]6C[C@H](CN6C(=O)[C@@H](NC4=O)[C@@H](C)O)O)[C@@H]([C@H](C7=CC=C(C=C7)O)O)O)[C@@H](C)O)C)O)O)O	0.16
560	CN(C)CC/C=C/1\C2=CC=CC=C2COC3=CC=CC=C31	0.2
561	CCCC(=O)OCOC(=O)C1=C(NC(=C(C1C2=C(C(=CC=C2)Cl)Cl)C(=O)OC)C)C	0.0038
562	CC(=NOC(=O)NC)SC	0.716
563	CC1=NC=C(N1CC(CCl)O)[N+](=O)[O-]	0.88
564	CC(C)(C)/[N+](=C/C1=C(C=C(C=C1)S(=O)(=O)[O-])S(=O)(=O)[O-])/[O-].[Na+].[Na+]	0.6
565	C1=C(C=C(C(=C1Br)O)Br)C#N	0.5001
566	C1=CC=C(C=C1)N2C(=O)C(=C(C=N2)N)Cl	0.4273
567	CC1=NC=CN1CCC(C2=CC=CC=C2)(C3=CC=CC=C3)C(=O)N	0.12
568	C1=CC(=NC(=C1Cl)C(=O)O)Cl	0.438
569	C[C@H](C1=CC(=CC(=C1)C(F)(F)F)C(F)(F)F)O[C@@H]2[C@@H](N(CCO2)CC3=NNC(=O)N3)C4=CC=C(C=C4)F	0.05
570	C[C@H]1[C@H]([C@H](C[C@@H](O1)O[C@H]2C[C@@](CC3=C2C(=C4C(=C3O)C(=O)C5=CC=CC=C5C4=O)O)(C(=O)C)O)N6CC6)OS(=O)(=O)C	0.006
571	C[C@H]1[C@@H]([C@@](C[C@@H](O1)O[C@H]2[C@H]3C(=O)N[C@@H](C4=C(C(=CC(=C4)O)O)C5=C(C=CC(=C5)[C@H](C(=O)N3)NC(=O)[C@H]6C7=CC(=C(C(=C7)OC8=C(C=C2C=C8)Cl)O[C@H]9[C@@H]([C@H]([C@@H]([C@H](O9)CO)O)O)O[C@H]1C[C@]([C@H]([C@@H](O1)C)O)(C)NCC1=CC=C(C=C1)C1=CC=C(C=C1)Cl)OC1=C(C=C(C=C1)[C@H]([C@H](C(=O)N[C@H](C(=O)N6)CC(=O)N)NC(=O)[C@@H](CC(C)C)NC)O)Cl)O)C(=O)O)(C)N)O	0.13
572	CC[C@@H]([C@H](C)O)N1C(=O)N(C=N1)C2=CC=C(C=C2)N3CCN(CC3)C4=CC=C(C=C4)OC[C@H]5C[C@](OC5)(CN6C=NC=N6)C7=C(C=C(C=C7)F)F	0.013
573	CC(C)CCCCCCCCC(=O)N[C@@H]1[C@H]([C@@H]([C@H](O[C@H]1OC2=C3C=C4C=C2OC5=C(C=C(C=C5)[C@H]([C@H]6C(=O)N[C@@H](C7=C(C(=CC(=C7)O)O[C@@H]8[C@H]([C@H]([C@@H]([C@H](O8)CO)O)O)O)C9=C(C=CC(=C9)[C@H](C(=O)N6)NC(=O)[C@@H]4NC(=O)[C@@H]1C2=C(C(=CC(=C2)OC2=C(C=CC(=C2)[C@H](C(=O)N[C@H](CC2=CC=C(O3)C=C2)C(=O)N1)NC)O)O)Cl)O)C(=O)NCCCN(C)C)O)Cl)C(=O)O)O)O	0.02
574	C[C@H](C1=CC(=CC(=C1)C(F)(F)F)C(F)(F)F)O[C@@H]2[C@@H](N(CCO2)CC3=NN(C(=O)N3)P(=O)(O)O)C4=CC=C(C=C4)F	0.02
575	CN(C)C(=O)C1=C(C=C(C=C1)NC=O)S(=O)(=O)NC(=O)NC2=NC(=CC(=N2)OC)OC	0.0649
576	CN(C)CCCN1C2=CC=CC=C2CCC3=C1C=C(C=C3)Cl.Cl	0.041
577	COC(=O)[C@]12CC3=C(C1=NN(CO2)C(=O)N(C4=CC=C(C=C4)OC(F)(F)F)C(=O)OC)C=CC(=C3)Cl	0
578	C1=CC=C(C(=C1)C2=C3C=C(C(=O)C(=C3OC4=C(C(=C(C=C24)Br)[O-])Br)Br)Br)C(=O)[O-].[Na+].[Na+]	0.0524
579	C1=CC2=C(C=C1OC(F)(F)F)SC(=N2)N	0.04
580	CN(C(=O)NC1=CC=C(C=C1)Cl)OC	0.205
581	COC(=O)N(C1=CC=CC=C1COC2=NN(C=C2)C3=CC=C(C=C3)Cl)OC	0.001584
582	CO/N=C/1\CN(CC1CN)C2=C(C=C3C(=O)C(=CN(C3=N2)C4CC4)C(=O)O)F	0.3
583	CC(=O)N[C@H](COC)C(=O)NCC1=CC=CC=C1	0.85
584	CC1NC2=CC(=C(C=C2C(=O)N1C3=CC=CC=C3C)S(=O)(=O)N)Cl	0.05
585	C(C(C(C(C(F)(F)S(=O)(=O)O)(F)F)(F)F)(F)F)(C(C(C(F)(F)F)(F)F)(F)F)(F)F	0.00363
586	C1=CC=C(C=C1)OC(=O)C2=CC=C(C=C2)O	0.045
587	CCCCNC(=O)N1C2=CC=CC=C2N=C1NC(=O)OC	1.77e-06
588	CS(=O)(=O)N(CCO)C1=C2C(=CC(=C1Cl)Cl)NC(=O)C(=O)N2	0.13
589	B([C@H](CC(C)C)NC(=O)[C@H](CC1=CC=CC=C1)NC(=O)C2=NC=CN=C2)(O)O	0.17
590	COCCCN1CCC(CC1)NC(=O)C2=CC(=C(C3=C2OCC3)N)Cl	0.7
591	CCN1CCC2(CC1)COC3=C2C=C4C(=C3)CCN4C(=O)C5=CC=C(C=C5)C6=C(C=C(C=C6)C7=NN=C(O7)C)C.Cl	0.015
592	CC1=CN=C(C=C1)S(=O)(=O)NC2=C(C(=NC(=N2)C3=CC(=NC=C3)C4=NNN=N4)OCCO)OC5=CC=CC=C5OC	0.02
593	CC(C)C1=CN=C(C=C1)S(=O)(=O)NC2=C(C(=NC(=N2)C3=CC(=NC=C3)C4=NNN=N4)OCCO)OC5=CC=CC=C5OC	0.0085
594	CCCCCCCCC1=CC=C(C=C1)O	0
595	C1C(=O)NC2=C(C=C(C=C2)Br)C(=N1)C3=CC=CC=N3	0.48
596	CCCOC1=NN(C(=O)N1C)C(=O)[N-]S(=O)(=O)C2=CC=CC=C2C(=O)OC.[Na+]	0.00891
597	CC1=C(C(=NO1)C2=CC=CC=C2)C3=CC=C(C=C3)S(=O)(=O)N	0.02
598	C1CN(CCC1NC(=O)C2=CC=CC=C2C3=CC=C(C=C3)C(F)(F)F)CCCCC4(C5=CC=CC=C5C6=CC=CC=C64)C(=O)NCC(F)(F)F	0.002
599	CC1=C2[C@H](C(=O)[C@@]3([C@H](C[C@@H]4[C@]([C@H]3[C@@H]([C@@](C2(C)C)(C[C@@H]1OC(=O)[C@@H]([C@H](C5=CC=CC=C5)NC(=O)OC(C)(C)C)O)O)OC(=O)C6=CC=CC=C6)(CO4)OC(=O)C)OC)C)OC	0.24
600	CCC[C@@H]1C[C@H](N(C1)C)C(=O)N[C@@H]([C@@H]2[C@@H]([C@@H]([C@H]([C@H](O2)SC)O)O)O)[C@H](C)Cl	0.06
601	COCCOC1=C(C=C2C(=C1)C(=NC=N2)NC3=CC=CC(=C3)C#C)OCCOC	0.07
602	CCCCCCCCOC1=CC(=C(C=C1)C(=O)C2=CC=CC=C2)O	1.37e-08
603	COC1=C(C=C2C(=C1)N=CN=C2NC3=CC(=C(C=C3)F)Cl)OCCCN4CCOCC4	0.089
604	CC(=O)C1=CC2=C(C=C1)OC([C@@H]([C@H]2NC(=O)C3=CC=C(C=C3)F)O)(C)C	0.187
605	CC(C)(C)NCC(C1=CC(=C(C=C1)O)CO)O	0.92
606	CCOC1=CC2=C(C=C1)N(C(=O)C23CCC(CC3)OCCN4CCOCC4)S(=O)(=O)C5=C(C=C(C=C5)C(=O)NC(C)(C)C)OC	0.1
607	COC(=O)C1=C(C(=C(C(=C1Cl)Cl)C(=O)OC)Cl)Cl	0.01666
608	CCCCN(CC)C1=C(C=C(C=C1[N+](=O)[O-])C(F)(F)F)[N+](=O)[O-]	0
609	C1[C@H]([C@H](CN1C(=O)[C@@H]([C@H](CC2=CC=CC=C2)NC(=O)C3=CC4=C(N3)C=CC(=C4)Cl)O)O)O	0.0234
610	C[N+]1([C@@H]2CC(C[C@H]1[C@H]3[C@@H]2O3)OC(=O)C(C4=CC=CS4)(C5=CC=CS5)O)C	0.28
611	CCC(CC)O[C@@H]1C=C(C[C@@H]([C@H]1NC(=O)C)N)C(=O)O	0.97
612	COC1=C(C=C(C=C1)Cl)[C@]2(C3=C(C=C(C=C3)C(F)(F)F)NC2=O)F	0.0038
613	C1=CC=C(C(=C1)C2=CC=C(C=C2)Cl)NC(=O)C3=C(N=CC=C3)Cl	0.03201
614	CCOC(=O)COC1=C(C=C(C(=C1)N2C(=O)C(=C(C=N2)C(F)(F)F)C)F)Cl	0.769
615	C1C[C@H]2C(=O)N[C@@H](CSSCCC(=O)N[C@H](C(=O)NCC(=O)N[C@H](C(=O)N[C@H](C(=O)N2C1)CC3=CNC4=CC=CC=C43)CC(=O)O)CCCCN=C(N)N)C(=O)N	0.75
616	C1CN(CCN1CCC2=CC(=O)N(C3=C2C=CC(=C3)F)CC(=O)N)C4=NC=CC5=C4C=CS5	0.0607
617	C1C(CN1C2=C(C=C3C(=C2Cl)N(C=C(C3=O)C(=O)O)C4=C(C=C(C(=N4)N)F)F)F)O	0.16
618	C(#N)C1=C(C(=C(C(=C1Cl)Cl)Cl)C#N)Cl	0.378
619	CCCCCCOC1=CC=C(C=C1)O	0.00077
620	CCCN(CCC)C1=C(C=C(C=C1[N+](=O)[O-])S(=O)(=O)N)[N+](=O)[O-]	0.004802
621	CC[C@@H]1[C@@]2([C@@H]([C@H](C(=O)[C@@H](C[C@@]([C@@H]([C@H](C(=O)[C@H](C(=O)O1)C)C)O[C@H]3[C@@H]([C@H](C[C@H](O3)C)N(C)C)O)(C)OC)C)C)N(C(=O)O2)CCCCN4C=C(N=C4)C5=CN=CC=C5)C	0.41
622	CCNC1=NC(=NC(=N1)Cl)NC(C)C	0.1237
623	COC1=C(C=CC(=C1C(=O)O)Cl)Cl	0.1802
624	CC(C)N(C1=CC=CC=C1)C(=O)CCl	0.345
625	COC1=C(C=C2C(=C1)C(=NC(=N2)N3CCN(CC3)C(=O)C4=CC=CO4)N)OC	0.06
626	CN1C=NC=C1[C@@](C2=CC=C(C=C2)Cl)(C3=CC4=C(C=C3)N(C(=O)C=C4C5=CC(=CC=C5)Cl)C)N	0.006
627	CCCN(CCC)C(=O)SCCC	0.01906
628	C1=CC(=NC(=C1)Cl)C(Cl)(Cl)Cl	5.81e-08
629	CCS(=O)(=O)CCN1C(=NC=C1[N+](=O)[O-])C	0.8
630	CC1=CC(=C(N1)/C=C\2/C3=CC=CC=C3NC2=O)C	0.008
631	C1=CC(=C(C=C1F)F)C(CN2C=NC=N2)(CN3C=NC=N3)OP(=O)(O)O	0.042
632	C[C@@H]1C2=C(CN1)C=C(C=C2)C3=C(C4=C(C=C3)C(=O)C(=CN4C5CC5)C(=O)O)OC(F)F	0.25
633	CC(=O)NC1=C(C(=C(C(=C1I)C(=O)O)I)N(C)C(=O)C)I	1
634	CCCCC1=C(C2=CC=CC=C2O1)C(=O)C3=CC(=C(C(=C3)I)OCCN(CC)CC)I	0.0002
635	C1[C@H](N(CC2=C(N1CC3=CN=CN3)C=CC(=C2)C#N)S(=O)(=O)C4=CC=CS4)CC5=CC=CC=C5	0.01
636	CCC(=O)NCC[C@@H]1CCC2=C1C3=C(C=C2)OCC3	0.2
637	CC(C)OC1=C(C=C(C(=C1)N2C(=O)OC(=N2)C(C)(C)C)Cl)Cl	0.00364
638	COC(=O)C1=CN=C2N1CCC3=CC=CC=C3C2=C4CCN(CC4)CCC5=CC=C(C=C5)OCC6=NC7=CC=CC=C7C=C6	0.001
639	CCCCC1=C(C2=CC=CC=C2O1)C(=O)C3=CC(=C(C(=C3)I)OCCN(CC)CC)I.Cl	0
640	C1CN(CCN1CCCN2C(=O)N3C=CC=CC3=N2)C4=CC(=CC=C4)Cl	0.08
641	CC1=C(N(C2=C1C=C(C=C2)O)CC3=CC=C(C=C3)OCCN4CCCCCC4)C5=CC=C(C=C5)O	0.02
642	CCCCCCCC1=CC=C(C=C1)O	0.00365
643	COC1=CC(=NC(=N1)NC(=O)[N-]S(=O)(=O)C2=C(C=CC=N2)OCC(F)(F)F)OC.[Na+]	0.00376
644	CC/C=C\C/C=C\C/C=C\C/C=C\C/C=C\C/C=C\CCC(=O)O[C@H]([C@H](C1=CC=CC=C1)NC(=O)C2=CC=CC=C2)C(=O)O[C@H]3C[C@]4([C@H]([C@H]5[C@@]([C@H](C[C@@H]6[C@]5(CO6)OC(=O)C)O)(C(=O)[C@@H](C(=C3C)C4(C)C)OC(=O)C)C)OC(=O)C7=CC=CC=C7)O	0.0038
645	CCSC(=O)N(CC(C)C)CC(C)C	0
646	C1=CC=C(C(=C1)C2=NN(C(=N2)C3=CC=CC=C3O)C4=CC=C(C=C4)C(=O)O)O	0.004
647	CCOCCN1C2=CC=CC=C2N=C1C3CCN(CC3)CCC4=CC=C(C=C4)C(C)(C)C(=O)O	0.13
648	C1=NC(=O)NC(=C1F)N	1
649	CC1=NC=C(C=C1)C2=C(C=C(C=N2)Cl)C3=CC=C(C=C3)S(=O)(=O)C	0.081
650	CN1CC[C@]23[C@@H]4[C@H]1CC5=C2C(=C(C=C5)O)O[C@H]3[C@H](C=C4)O[C@H]6[C@@H]([C@H]([C@@H]([C@H](O6)C(=O)O)O)O)O	0.67
651	COC1=C(C=CC(=C1)C2=CC(=C(C=C2)N)OC)N.Cl.Cl	0.201
652	CCCCCCCCCCCCCCCC(=O)N[C@@H](CCC(=O)NCCCC[C@@H](C(=O)N[C@@H](CCC(=O)O)C(=O)N[C@@H](CC1=CC=CC=C1)C(=O)N[C@@H]([C@@H](C)CC)C(=O)N[C@@H](C)C(=O)N[C@@H](CC2=CNC3=CC=CC=C32)C(=O)N[C@@H](CC(C)C)C(=O)N[C@@H](C(C)C)C(=O)N[C@@H](CCCNC(=N)N)C(=O)NCC(=O)N[C@@H](CCCNC(=N)N)C(=O)NCC(=O)O)NC(=O)[C@H](C)NC(=O)[C@H](C)NC(=O)[C@H](CCC(=O)N)NC(=O)CNC(=O)[C@H](CCC(=O)O)NC(=O)[C@H](CC(C)C)NC(=O)[C@H](CC4=CC=C(C=C4)O)…	0.01
653	C[C@@]1([C@H]2[C@@H]([C@H]3[C@@H](C(=O)C(=C([C@]3(C(=O)C2=C(C4=C1C=CC=C4O)O)O)O)C(=O)N)N(C)C)O)O.Cl	0.6283
654	C(=O)(C(C(C(C(C(C(C(C(C(C(F)(F)F)(F)F)(F)F)(F)F)(F)F)(F)F)(F)F)(F)F)(F)F)(F)F)O	8.05e-09
655	C1CC(C1)CN2CC[C@]34[C@@H]5[C@H](CC[C@]3([C@H]2CC6=C4C(=C(C=C6)O)O5)O)O	0.5
656	C1=CC=C2C3=C4C(=CC=C3)C5=CC=CC=C5C4=CC2=C1	0.01059
657	CC(C)CN(C[C@H]([C@H](CC1=CC=CC=C1)NC(=O)O[C@H]2CO[C@@H]3[C@H]2CCO3)O)S(=O)(=O)C4=CC=C(C=C4)N	0.05
658	C1=CC=C2C(=C1)C3=CC=CC4=C3C2=CC=C4	0.01409
659	CC(C)N(CC[C@H](C1=CC=CC=C1)C2=C(C=CC(=C2)CO)O)C(C)C	0.5
660	CC(C)C1=C(C(=CC=C1)C(C)C)O	0.016
661	C[C@@H]1[C@H]([C@H](C[C@@H](O1)O[C@@H]2[C@H](O[C@H](C[C@@H]2O)O[C@@H]3[C@H](O[C@H](C[C@@H]3O)O[C@H]4CC[C@]5([C@@H](C4)CC[C@@H]6[C@@H]5C[C@H]([C@]7([C@@]6(CC[C@@H]7C8=CC(=O)OC8)O)C)O)C)C)C)O)O	0.7
662	C[C@H]1[C@H]([C@H](C[C@@H](O1)O[C@H]2C[C@@](CC3=C2C(=C4C(=C3O)C(=O)C5=C(C4=O)C(=CC=C5)OC)O)(C(=O)C)O)N)O	0.06
663	COC1=CC(=NC(=N1)NC(=O)NS(=O)(=O)C2=C(C=CC(=C2)CNS(=O)(=O)C)C(=O)OC)OC	0
664	C1=CC2=C3C(=C1)C=CC3=CC=C2	0.01116
665	C1CC1N2C=C(C(=O)C3=CC(=C(C(=C32)C#N)N4C[C@H]5[C@H](C4)OCCN5)F)C(=O)O	0.75
666	C1CNC[C@@H]1N2CC/C(=C\C3=C(N4[C@@H]([C@@H](C4=O)NC(=O)/C(=N\O)/C5=NSC(=N5)N)SC3)C(=O)O)/C2=O	0.62
667	CC1=NC2=C(N1)CCN(C3=CC=CC=C32)C(=O)C4=CC=C(C=C4)NC(=O)C5=CC=CC=C5C6=CC=CC=C6	0.01
668	CCOP(=S)(C1=CC=CC=C1)OC2=CC=C(C=C2)[N+](=O)[O-]	0.01016
669	CC(C)(C)C1=NN=C(N(C1=O)N)SC	0.4787
670	CN/C(=N\[N+](=O)[O-])/NCC1=CN=C(S1)Cl	0.5059
671	CC1=CC=C(C=C1)S(=O)(=O)NC(=O)NN2CC3CCCC3C2	0.03
672	CN1C2=C(C=C(C=C2)C(=O)N(CCC(=O)O)C3=CC=CC=N3)N=C1CNC4=CC=C(C=C4)C(=N)N	0.65
673	CCCCC(CC)COC(=O)C1=CC=C(C=C1)N(C)C	2.77e-08
674	C1=CC=C(C=C1)C2=C(OC(=N2)CCC(=O)O)C3=CC=CC=C3	0.00039
675	CC[C@H](CC1=C(C=CS1)Cl)NC2=C3C=CN(C3=NC=N2)[C@@H]4C[C@@H]([C@H]([C@H]4O)O)C(=O)NCC	0.03
676	CC(=C)C(=O)OCCC(C(C(C(C(C(F)(F)F)(F)F)(F)F)(F)F)(F)F)(F)F	0.02654
677	C[C@H](C(=O)N)NC(=O)[C@@H]1CCCN1C(=O)[C@H](CCCCNC(C)C)NC(=O)[C@H](CC(C)C)NC(=O)[C@@H](CC2=CC=C(C=C2)NC(=O)N)NC(=O)[C@H](CC3=CC=C(C=C3)NC(=O)[C@@H]4CC(=O)NC(=O)N4)NC(=O)[C@H](CO)NC(=O)[C@@H](CC5=CN=CC=C5)NC(=O)[C@@H](CC6=CC=C(C=C6)Cl)NC(=O)[C@@H](CC7=CC8=CC=CC=C8C=C7)NC(=O)C	0.1
678	C1=CC=C2C(=C1)N=C(S2)SCSC#N	0.331
679	CC(=O)OCC1=C(N2[C@@H]([C@@H](C2=O)NC(=O)CSC3=CC=NC=C3)SC1)C(=O)O	0.55
680	CN(C)C(=O)NC1=CC=CC(=C1)C(F)(F)F	0.2589
681	C1=NC2=C(N=C(N=C2N1[C@H]3[C@H]([C@@H]([C@H](O3)CO)O)O)F)N	0.76
682	CCNC1=NC(=NC(=N1)Cl)NC(C)(C)C#N	0.3155
683	C1(=C(C(=NC(=C1Cl)Cl)Cl)Cl)Cl	4.42e-08
684	CC1=C(C(C(=C(N1)C)C(=O)OC)C2=CC=CC=C2[N+](=O)[O-])C(=O)OC	0.044
685	COC1=CN=C(N2C1=NC(=N2)NS(=O)(=O)C3=C(C=CC=C3OCC(F)F)C(F)(F)F)OC	0.01009
686	C[C@H]1CCC[C@@]2([C@@H](O2)C[C@H](NC(=O)C[C@@H](C(C(=O)[C@@H]([C@H]1O)C)(C)C)O)/C(=C/C3=CSC(=N3)C)/C)C	0.2
687	C[C@@H]1CC(=O)NN=C1C2=CC=C(C=C2)NC(=O)C	0.4
688	CC(C)(C)NCC(=O)NC1=CC(=C2C[C@H]3C[C@H]4[C@@H](C(=O)C(=C([C@]4(C(=O)C3=C(C2=C1O)O)O)O)C(=O)N)N(C)C)N(C)C	0.2
689	CC(C1=CC(=CC=C1)C(=O)C2=CC=CC=C2)C(=O)O	0.008
690	CC[C@]1(CC(=O)OCC2=C1C=C3C4=C(CN3C2=O)C=C5C=C(C(=CC5=N4)F)F)O	0.1257
691	CCSC(=O)N1CCCCCC1	0.09714
692	C[C@@H]1CC[C@H]2C[C@@H](/C(=C/C=C/C=C\[C@H](C[C@H](C(=O)[C@@H]([C@@H](/C(=C/[C@H](C(=O)C[C@H](OC(=O)[C@@H]3CCCCN3C(=O)C(=O)[C@@]1(O2)O)[C@H](C)C[C@@H]4CC[C@@H]([C@@H](C4)OC)N5C=NN=N5)C)/C)O)OC)C)C)/C)OC	0.26
693	COC1=C(C=C(C=C1)/C=C\C2=CC(=C(C(=C2)OC)OC)OC)OP(=O)(O)O	0.23
694	C[C@@H](C1=CC2=C(C=C1)C=C(C=C2)OC)C(=O)O	0.002
695	CCOP(=O)(NC(C)C)OC1=CC(=C(C=C1)SC)C	0.04138
696	C[C@@H]1[C@@H]2[C@H](C(=O)N2C(=C1S[C@H]3C[C@H](N(C3)C)C(=O)N4CC[C@@H](C4)NC(=O)CN=C(N)N)C(=O)O)[C@@H](C)O	0.91
697	CC(C)C[C@H]1C(=O)N2CCC[C@H]2[C@]3(N1C(=O)[C@](O3)(C(C)C)NC(=O)[C@H]4CN([C@@H]5CC6=C(NC7=CC=CC(=C67)C5=C4)Br)C)O.CS(=O)(=O)O	0.00955
699	CN1C(=O)CC(=O)N(C2=C1C=CC(=C2)Cl)C3=CC=CC=C3	0.21
700	C1=CC=C(C=C1)[C@H](CNCCC2=CC=C(C=C2)NC(=O)CC3=CSC(=N3)N)O	0.29
701	C1=CC2=C(C=CC=C2N)C(=C1)N	0.6333
702	CCCC1=NC(=C2N1N=C(NC2=O)C3=C(C=CC(=C3)S(=O)(=O)N4CCN(CC4)CC)OCC)C	0.05
703	C1=CC(=C(C=C1C2=C(C=C(C=C2)F)F)C(=O)O)O	0.0016
704	C[C@H](C1=CC=CC2=CC=CC=C21)NCCCC3=CC(=CC=C3)C(F)(F)F	0.05
705	CC1=CC2=C(C=C1)C(=NC(=O)N2C(C)C)C3=CC=CC=C3	0.02
706	CC(=O)NC1=C(C(=C(C(=C1I)C(=O)O)I)C(=O)NC)I	0.98
707	CC1(OC2=C(O1)C(=CC=C2)OC(=O)NC)C	0.1971
708	CCO/N=C(/C1=NSC(=N1)NP(=O)(O)O)\C(=O)N[C@H]2[C@@H]3N(C2=O)C(=C(CS3)SC4=NC(=CS4)C5=CC=[N+](C=C5)C)C(=O)[O-]	0.8
709	C1=CC(=C(C=C1Cl)Cl)COC(CN2C=CN=C2)C3=C(C=C(C=C3)Cl)Cl	0.08
710	CC(C)(C)NCC(C1=CC(=CC(=C1)O)O)O	0.75
711	CC(C)N(C(C)C)C(=O)SCC(=C(Cl)Cl)Cl	0
712	C1COCCC1(C(=O)NO)NS(=O)(=O)C2=CC=C(C=C2)OC3=CC=C(C=C3)F	0.145
713	CCOP(=S)(OCC)SCN1C2=C(C=C(C=C2)Cl)OC1=O	0.00608
714	CC1=C(N=C(N=C1OC(=O)N(C)C)N(C)C)C	0.1633
715	CC(C)(C)C1=CC=C(C=C1)OC2CCCCC2OS(=O)OCC#C	0.0133
716	CNC(=O)O/N=C(/C(=O)N(C)C)\SC	0.7926
717	C[C@H]1[C@H](O1)P(=O)(O)O	1
718	C[C@]12C[C@@]3([C@@H]4C[C@]1([C@@]4([C@H](O2)O3)COC(=O)C5=CC=CC=C5)O[C@H]6[C@@H]([C@H]([C@@H]([C@H](O6)CO)O)O)O)O	0.77
719	CCCCOCN(C1=C(C=CC=C1CC)CC)C(=O)CCl	0
720	C[C@H]1[C@H]([C@H](C[C@@H](O1)O[C@H]2C[C@@](CC3=C2C(=C4C(=C3O)C(=O)C5=C(C4=O)C(=CC=C5)OC)O)(C(=O)CO)O)N)O	0.28
721	CC(CC1=CC=CC=C1)N(C)CC#C	0.13
722	CNC(=O)OC1=CC=CC(=C1)N=CN(C)C.Cl	0.8853
723	CCCCCOC1=CC=C(C=C1)C2=CC(=NO2)C3=CC=C(C=C3)C(=O)N[C@H]4C[C@H]([C@H](NC(=O)[C@@H]5[C@H]([C@H](CN5C(=O)[C@@H](NC(=O)[C@@H](NC(=O)[C@@H]6C[C@H](CN6C(=O)[C@@H](NC4=O)[C@@H](C)O)O)[C@@H]([C@H](C7=CC(=C(C=C7)O)OS(=O)(=O)O)O)O)[C@@H](CC(=O)N)O)C)O)O)O	0.0023
724	CCCCC[C@@H](CC(=O)CCC1=CC(=C(C=C1)O)OC)O	0.141
725	C1[C@@H]([C@H](O[C@H]1N2C=NC(=NC2=O)N)CO)O	1
726	CCN(CC1=CC(=CC=C1)S(=O)(=O)[O-])C2=CC=C(C=C2)C(=C3C=CC(=[N+](CC)CC4=CC(=CC=C4)S(=O)(=O)[O-])C=C3)C5=C(C=C(C=C5)O)S(=O)(=O)[O-].[Na+].[Na+]	0.0151
727	COC(=O)NC(=S)NC1=CC=CC=C1NC(=S)NC(=O)OC	0.427
728	C1=CC=C(C=C1)C(C2=CC=CC=C2)(C3=CC=CC=C3Cl)N4C=CN=C4	0.00953
729	CC1=CC2=C(N1)C=CC=C2OCC(CNC(C)C)O	0.51
730	C12(C3(C4(C5(C3(C(C1(C5(C2(C4(Cl)Cl)Cl)Cl)Cl)(Cl)Cl)Cl)Cl)Cl)Cl)Cl	0.01508
731	CC[NH+]=C1C=CC(=C(C2=CC=C(C=C2)N(CC)CC)C3=CC=C(C=C3)N(CC)CC)C4=CC=CC=C14.[Cl-]	1.56e-08
732	C[C@@H]1C[C@H]2[C@@H]3CCC4=CC(=O)C=C[C@@]4([C@]3([C@H](C[C@@]2([C@]1(C(=O)COP(=O)([O-])[O-])O)C)O)F)C.[Na+].[Na+]	0.0956
733	CS(=O)(=O)C1=CC=C(C=C1)[C@H]([C@@H](COC(=O)CN)NC(=O)C(Cl)Cl)O	0.27
734	CC(C)(C#C)NC(=O)C1=CC(=CC(=C1)Cl)Cl	0.06756
735	CCCNC(C)C(=O)NC1=C(SC=C1C)C(=O)OC	0.46
736	CCOP(=S)(OCC)OC1=NN(C=N1)C2=CC=CC=C2	0.049
737	CC(C)(C1=CC(=C(C=C1)O)C2=CC=CC=C2)C3=CC(=C(C=C3)O)C4=CC=CC=C4	2.4e-08
738	CC1=CC(=C(C=C1)O)C(C)(C)C	0.0272
739	C[C@@H](C1=NC(=CS1)C2=CC=C(C=C2)C#N)[C@](CN3C=NC=N3)(C4=C(C=CC(=C4)F)F)O	0.01
740	C1=CC(=CC=C1COC(CN2C=CN=C2)C3=C(C=C(C=C3)Cl)Cl)Cl.[N+](=O)(O)[O-]	0.00553
741	CC1=C(C(=C(C=C1)C)O)C	0.0908
742	C1CC1C2=C(C=NN2C3=CC=CC4=C3C=CC=N4)C(=O)N=C(N)N	0.34
743	CN1CCN2C(C1)C3=CC=CC=C3CC4=CC=CC=C42	0.05
744	C1CN2CCC1[C@H](C2)OC(=O)N3CCC4=CC=CC=C4[C@@H]3C5=CC=CC=C5	0.02
745	CC1=C2COC(=O)C2=C(C(=C1OC)C/C=C(\C)/CCC(=O)O)O	0.02
746	C1C(O1)CN2C(=O)N(C(=O)N(C2=O)CC3CO3)CC4CO4	0.402
747	CN1CC(C2=C(C1)C(=CC=C2)N)C3=CC=CC=C3	0.4
748	C[C@]12CC[C@H]3[C@H]([C@@H]1CC[C@]2(C#C)O)CCC4=C3C=CC(=C4)OS(=O)(=O)O	0.011
749	C[C@@H](CN1CC(=O)NC(=O)C1)N2CC(=O)NC(=O)C2	1
750	CCCCCCCCCCCCCN1CC(OC(C1)C)C	0.002679
751	CCCCC(CC)COCC1CO1	1
752	CN(C)C1=CC=C(C=C1)C(=N)C2=CC=C(C=C2)N(C)C.Cl	0.107
753	C1=CC=C(C(=C1)CC2=CC=C(C=C2)O)O	0.0426
754	C1=CC=C2C(=C1)N=C(S2)[S-].[Na+]	0.0368
755	CC1=NC=CN1C2=CC=C(C=C2)SC3=CC=CC(=C3)C4(CCOCC4)C(=O)N.CS(=O)(=O)O	0.0645
756	CC(C)N1C(=O)C2=CC=CC=C2NS1(=O)=O	0.02147
757	CCO[C@@H](CC1=CC=C(C=C1)OCCC2=CC=C(C=C2)OS(=O)(=O)C)C(=O)O	0.0011
758	C1=CC=C(C=C1)COC(=O)C2=CC=CC=C2C(=O)O	0.0352
759	CCOP(=S)(NC(C)C)OC1=CC=CC=C1C(=O)OC(C)C	0.0105
760	C[C@@H]1C[C@@H]2CC[C@H]3C(=C)C[C@@H](O3)CC[C@]45C[C@@H]6[C@H](O4)[C@H]7[C@@H](O6)[C@@H](O5)[C@@H]8[C@@H](O7)CC[C@@H](O8)CC(=O)C[C@H]9[C@H](C[C@H](C1=C)O2)O[C@@H]([C@@H]9OC)C[C@@H](CN)O	0.43
761	C[C@H]1[C@H]([C@H](C[C@@H](O1)O[C@H]2C[C@@](CC3=C2C(=C4C(=C3O)C(=O)C5=C(C4=O)C(=CC=C5)OC)O)(C(=O)CO)O)N)O.Cl	0.157
762	C1CN(CCC1CC2=CC=C(C=C2)F)CCS(=O)C3=CC4=C(C=C3)NC(=O)O4	0.0385
763	CCCOC(=O)NCCCN(C)C.Cl	0.8435
764	CC(C)C[C@H]1C(=O)N2CCC[C@H]2[C@]3(N1C(=O)[C@](O3)(C(C)C)NC(=O)[C@H]4CN([C@@H]5CC6=C(NC7=CC=CC(=C67)C5=C4)Br)C)O	0.07
765	CCO/C(=N/C1=C[N+](=NO1)N2CCOCC2)/[O-]	1
766	CC1=CC(=C(C=C1)C)OCCCC(C)(C)C(=O)O	0.03
767	CCOC1=NC(=NS1)C(Cl)(Cl)Cl	0
768	CC1=NN=C(S1)SCC2=C(N3[C@@H]([C@@H](C3=O)NC(=O)CN4C=NN=N4)SC2)C(=O)O	0.18
769	CC1=CC(=C(C=C1S(=O)(=O)[O-])OC)N=NC2=C(C=CC3=C2C=CC(=C3)S(=O)(=O)[O-])O.[Na+].[Na+]	0.0137
770	CCOC1C(C2=C(O1)C=CC(=C2)OS(=O)(=O)C)(C)C	0.1313
771	CCC(C)NC1=NC(=NC(=N1)NCC)OC	0.0461
772	C1=CC=C2C(=C1)C(=O)NS2	0
773	CCCCCCCCN1C(=O)C=CS1	0.02822
774	C[C@H]([C@H](C1=CC=C(C=C1)O)O)NCCC2=CC=C(C=C2)O	0.64
775	COC1=CC(=C(C=C1Cl)OC)Cl	0.5774
776	CC1([C@@H](N2[C@H](S1)[C@@H](C2=O)NC(=O)[C@@H](C3=CC=C(C=C3)O)N)C(=O)O)C	0.85
777	CC(C)(C)NC[C@@H](COC1=NSN=C1N2CCOCC2)O	0.4
778	C1CN(CCC1NC(=O)C2=CC=CC=C2)CCC3=CNC4=CC=CC=C43	0.15
779	CCCCCCCCCCCCN1CCCC1=O	0.0125
780	CCCC1=CC=C(C=C1)N	0.136
781	CN(C)C[C@H]1CCCC[C@@]1(C2=CC(=CC=C2)OC)O	0.8
782	CCCCN1CCCC[C@H]1C(=O)NC2=C(C=CC=C2C)C	0.03
783	CNC1=C(C(=O)N(N=C1)C2=CC=CC(=C2)C(F)(F)F)Cl	0.1841
784	C1=CC=C2C(=C1)[N+](=C(N=[N+]2[O-])N)[O-]	0.81
785	CCCSC1=NC(=C2C(=N1)N(N=N2)[C@@H]3C[C@@H]([C@H]([C@H]3O)O)OCCO)N[C@@H]4C[C@H]4C5=CC(=C(C=C5)F)F	0.002
786	C=CCNC1=NC(=NC(=N1)N2CCN(CC2)C(C3=CC=C(C=C3)F)C4=CC=C(C=C4)F)NCC=C	0.01
787	C1C[C@H](N(C1)C(=O)CNC23CC4CC(C2)CC(C4)(C3)O)C#N	0.8851
788	C1C[N+]2=CC=CC=C2C3=CC=CC=[N+]31	0.59
789	C1=CC(=CC=C1C2=CC(=O)C3=C(C(=C(C=C3O2)O[C@H]4[C@@H]([C@H]([C@@H]([C@H](O4)C(=O)O)O)O)O)O)O)O	0.1
790	C1=CC(=CC=C1N=NC2=C(C=CC3=C2C=CC(=C3)S(=O)(=O)[O-])O)S(=O)(=O)[O-].[Na+].[Na+]	1.38e-07
791	CCCC1=CC(=C(C=C1)O)OC	0.0707
792	C(C(C(C(C(F)(F)S(=O)(=O)[O-])(F)F)(F)F)(F)F)(C(C(C(F)(F)F)(F)F)(F)F)(F)F.[K+]	0.00363
793	CC(C1=CC=C(C=C1)O)(C2=CC=C(C=C2)O)C3=CC=C(C=C3)O	0.0141
794	CCN(CC)C(=O)SCC1=CC=C(C=C1)Cl	1.88e-08
795	CC1=C(C=C(C=C1)N)O	0.604
796	CCCCNC1=C(C(=CC(=C1)C(=O)O)S(=O)(=O)N)OC2=CC=CC=C2	0.031
797	CC1=C(C(=O)C[C@@H]1OC(=O)[C@@H]2[C@H](C2(C)C)C=C(C)C)CC=C	2.31e-08
798	CC(C)C1=NC(=NC(=C1/C=C/[C@H](C[C@H](CC(=O)O)O)O)C2=CC=C(C=C2)F)N(C)S(=O)(=O)C	0.12
799	CN1CCN(CC1)CC(=O)N2C3=CC=CC=C3C(=O)NC4=C2N=CC=C4	0.89
800	CCC1=C(N(N=C1C(=O)NN2CCCCC2)C3=C(C=C(C=C3)Cl)Cl)C4=CC=C(C=C4)Br	3.63e-08
801	CC1([C@H](N2[C@H](S1)[C@@H](C2=O)NC(=O)C(C3=CC=CC=C3)NC(=O)N=C(N)N)C(=O)O)C	0.8
802	CC1=NN=C2N1C3=C(C=C(C=C3)Cl)C(=NC2)C4=CC=CC=C4Cl	0.1
803	C1C(=O)NC2=C(C=C(C=C2)Cl)C(=N1)C3=CC=CC=C3Cl	0.051
804	CC1=NN=C2N1C3=C(C=C(C=C3)Cl)C(=NC2)C4=CC=CC=C4	0.32
805	CC1=CC=CC=C1C2=CC(=NC=C2N(C)C(=O)C(C)(C)C3=CC(=CC(=C3)C(F)(F)F)C(F)(F)F)N4CCN(CC4)C	0.003
806	CC1=CC(=CC(=C1OC2=C3CCCC3=C(C=C2)O)C)NC(=O)C(=O)O	0.0126
807	CCCN(CCC)C1=C(C=C(C(=C1[N+](=O)[O-])N)C(F)(F)F)[N+](=O)[O-]	0
808	CC1=CN=C(C=N1)C(=O)NCCC2=CC=C(C=C2)S(=O)(=O)NC(=O)NC3CCCCC3	0.02
809	C1=CC(=C(C(=C1)Cl)CC(=O)N=C(N)N)Cl	0.28
810	CC(C)NCC(COC1=CC=C(C=C1)CC(=O)N)O	0.94
811	CC1=C[C@@H]2[C@H](CC[C@]3([C@H]2CC(=C)[C@@]3(C(=O)C)OC(=O)C)C)[C@@]4(C1=CC(=O)CC4)C	0.0232
812	CC1=CC(=CC=C1)N2CC(OC2=O)CO	0.49
813	CCOP(=S)(OCC)OC1=NC(=C(C=C1Cl)Cl)Cl	0.007932
814	CCN(CC)C1=NC(=CC(=N1)OP(=S)(OC)OC)C	0.0134
815	C1C(C2=CC=CC=C2N(C3=CC=CC=C31)C(=O)N)O	0.7
816	C(C(C(F)(F)S(=O)(=O)[O-])(F)F)(C(F)(F)F)(F)F.[K+]	0.01933
817	CCCCCCCC[Si](OCC)(OCC)OCC	0.026
818	CC(C1=CC(=CC=C1)OC2=CC=CC=C2)C(=O)O	0.02
819	C1=CC(=CC=C1C(C2=CC=C(C=C2)O)C(Cl)(Cl)Cl)O	0
820	COC1=CC(=CC(=C1O)OC)[C@H]2[C@@H]3[C@H](COC3=O)[C@@H](C4=CC5=C(C=C24)OCO5)O[C@H]6[C@@H]([C@H]([C@H]7[C@H](O6)CO[C@H](O7)C8=CC=CS8)O)O	0.0044
821	COP(=S)(OC)OC1=CC=C(C=C1)[N+](=O)[O-]	0.02832
822	CCOP(=S)(OCC)SCSCC	0.0129
823	CCOP(=S)(OCC)SCCSCC	1.65e-06
824	C1=CC=C2C(=C1)C=CC3=CC=CC=C3N2C(=O)N	0.5141
825	COC1=C2C(=CC3=C1OC=C3)C=CC(=O)O2	0.09
826	CO[Si](C1=CC=CC=C1)(OC)OC	0.7107
827	CC(CC1=CC=CC=C1)N	0.3282
828	C1CCN(CC1)C2(CCN(CC2)CCC(C#N)(C3=CC=CC=C3)C4=CC=CC=C4)C(=O)N	0.061
829	CC1=C(C(CCC1)(C)C)/C=C/C(=C/C=C/C(=C/C(=O)O)/C)/C	0.00597
830	C[N+](C)(C)CC1CO1.[Cl-]	0.518
831	CC1=CC2=C(C(=C(C(=C2C(C)C)O)O)C=O)C(=C1C3=C(C4=C(C=C3C)C(=C(C(=C4C=O)O)O)C(C)C)O)O	0.01
832	C[C@@H]1CC2=C(C=C(C(=C2C(=O)O1)O)C(=O)N[C@@H](CC3=CC=CC=C3)C(=O)O)Cl	0.0002
833	CN(C)CCCN1C2=CC=CC=C2CCC3=C1C=C(C=C3)Cl	0.029
834	CN(C)CCCN1C2=C(CCC3=CC=CC=C31)C=C(C=C2)O	0.36
835	C1=CC(=CC=C1CCCC(=O)O)N(CCCl)CCCl	0.01
836	CC1=CN(C(=O)NC1=O)[C@H]2C[C@@H]([C@H](O2)CO)N=[N+]=[N-]	0.914
837	CC(=O)NP(=O)(OC)SC	0.8684
838	CC1=CN(C(=O)NC1=O)[C@H]2C=C[C@H](O2)CO	1
839	C(C(F)(F)F)(Cl)Cl	0.5388
840	C(=O)(C(C(C(C(C(F)(F)F)(F)F)(F)F)(F)F)(F)F)O	0.01676
841	C1[C@@H]2C=C[C@H]1[C@H]3[C@@H]2[C@]4(C(=C([C@@]3(C4(Cl)Cl)Cl)Cl)Cl)Cl	0.0134
842	CCOP(=O)(OCC)OC1=CC=C(C=C1)[N+](=O)[O-]	0.46
843	CC1=C(C(=NO1)C2=C(C=CC=C2Cl)Cl)C(=O)N[C@H]3[C@@H]4N(C3=O)[C@H](C(S4)(C)C)C(=O)O	0.033
844	CC1=CC(=C(C=C1)N=NC2=C(C=CC3=CC=CC=C32)O)C	2.63e-08
845	CCNP(=S)(OC)O/C(=C/C(=O)OC(C)C)/C	0.009787
846	CCC1=C(C=C2CC(CC2=C1)NC[C@@H](C3=C4C=CC(=O)NC4=C(C=C3)O)O)CC	0.05
847	CCN(CC)CCOC(=O)C(CC1CCCO1)CC2=CC=CC3=CC=CC=C32	0.2
848	CNC(=O)C1=CN(N=C1)C2=NC(=C3C(=N2)N(C=N3)[C@H]4[C@@H]([C@@H]([C@H](O4)CO)O)O)N	0.7
849	COC(=O)NC1=NC2=C(N1)C=C(C=C2)C(=O)C3=CC=CC=C3	0.086
850	CCC(C)N1C(=O)C(=C(NC1=O)C)Br	0.0852
851	CC(C)(C)CC(C)(C)C1=CC(=C(C=C1)O)N2N=C3C=CC=CC3=N2	0.0223
852	C1=NNC2=C1C(=O)NC=N2	0.97
853	CC1=C(C(=CC=C1)C)OCC(C)N	0.36
854	CC(C1=CC=C(C=C1)N2CC3=CC=CC=C3C2=O)C(=O)O	0.01
855	CNC(=O)C1=CC=CC=C1SC2=CC3=C(C=C2)C(=NN3)/C=C/C4=CC=CC=N4	0.004
856	C1CCC2=NC3=CC=CC=C3C(=C2C1)N	1
857	C[C@H](CCCC(C)(C)O)[C@H]1CC[C@@H]\2[C@@]1(CCC/C2=C\C=C/3\C[C@H](C[C@@H](C3=C)O)O)C	0
858	C1=CC=C2C(=C1)C3=CC=CC=C3C2(C4=CC=C(C=C4)O)C5=CC=C(C=C5)O	1.24e-08
859	C[C@@]1(CO[C@@H]([C@@H]([C@H]1NC)O)O[C@H]2[C@@H](C[C@@H]([C@H]([C@@H]2O)O[C@@H]3[C@@H](CC=C(O3)CN)N)N)N)O	0.15
860	CCN[C@@H](C)CC1=CC(=CC=C1)C(F)(F)F	0.66
861	CC(C)(C)[C@@H](C(=O)N1CCN(CC1)CC2=CC3=C(C=C2)OCO3)NC(=O)[C@H](CC4CCCC4)CN(C=O)O	0.2
862	C1=CC(=C(C=C1C2=CC(=C(C=C2)Cl)Cl)Cl)Cl	0
863	CCN(CC)CCNC(=O)C1=CC=C(C=C1)NC(=O)C	0.9
864	CC12CC1(C(=O)N(C2=O)C3=CC(=CC(=C3)Cl)Cl)C	0.0499
865	CC1([C@@H](N2[C@H](S1)[C@@H](C2=O)N=CN3CCCCCC3)C(=O)O)C	0.9
866	C1[C@@H]([C@H]([C@@H]([C@H]([C@@H]1N)O[C@@H]2[C@@H]([C@H]([C@@H]([C@H](O2)CO)O)N)O)O)O[C@@H]3[C@@H](C[C@@H]([C@H](O3)CN)O)N)N	1
867	CC(C1=CC=C(S1)C(=O)C2=CC=CC=C2)C(=O)O	0.015
868	CN(C)C(=O)NC1=CC(=C(C=C1)Cl)Cl	0.1615
869	CN(C(=O)NC1=CC(=C(C=C1)Cl)Cl)OC	0.1051
870	CC1=C2[C@H](C(=O)[C@@]3([C@H](C[C@@H]4[C@]([C@H]3[C@@H]([C@@](C2(C)C)(C[C@@H]1OC(=O)[C@@H]([C@H](C5=CC=CC=C5)NC(=O)C6=CC=CC=C6)O)O)OC(=O)C7=CC=CC=C7)(CO4)OC(=O)C)O)C)OC(=O)C	0.12
871	CC1=CC(=C(C=C1)N=CN(C)C=NC2=C(C=C(C=C2)C)C)C	3.02e-08
872	CCOC(=O)C1=CN=CN1[C@H](C)C2=CC=CC=C2	0.23
873	C1=CC(=CC=C1/C=C/C(=O)CC(=O)/C=C/C2=CC=C(C=C2)O)O	3.08e-08
874	C=CCN(C1=C(C=CC=C1Cl)Cl)C2=NCCN2	0.4
875	CCCCCC1=CC=C(C=C1)N	0.0234
876	CCCCCCC1=CC=C(C=C1)N	0.00695
877	C1=C(C=C(C=C1Cl)Cl)C2=CC(=CC(=C2)Cl)Cl	0
878	CC(=O)O[C@@H]1[C@@H](SC2=CC=CC=C2N(C1=O)CCN(C)C)C3=CC=C(C=C3)OC.Cl	0.22
879	CCOP(=S)(OCC)OC1=NC(=NC(=C1)C)C(C)C	0.0388
880	COC(=O)NS(=O)(=O)C1=CC=C(C=C1)N	0.456
881	C[C@@H]1OC[C@@H]2[C@@H](O1)[C@@H]([C@H]([C@@H](O2)O[C@H]3[C@H]4COC(=O)[C@@H]4[C@@H](C5=CC6=C(C=C35)OCO6)C7=CC(=C(C(=C7)OC)O)OC)O)O	0.12
882	CS(=O)(=O)C1=C(C(=C(C=C1)C(=O)C2C(=O)CCCC2=O)Cl)COCC(F)(F)F	0.0919
883	C(=O)(C(C(C(C(C(C(C(F)(F)F)(F)F)(F)F)(F)F)(F)F)(F)F)(F)F)O	0.004779
884	C(=O)(C(C(C(C(C(C(C(C(C(F)(F)F)(F)F)(F)F)(F)F)(F)F)(F)F)(F)F)(F)F)(F)F)O	0.00284
885	CCC(C)NC1=C(C=C(C=C1[N+](=O)[O-])C(C)(C)C)[N+](=O)[O-]	0
886	C1=CC(=C(C=C1Cl)O)OC2=C(C=C(C=C2)Cl)Cl	0.00428
887	CCCN(CCC)C1=C(C=C(C=C1[N+](=O)[O-])C(C)C)[N+](=O)[O-]	2.92e-08
888	C1=C(C=C(C(=C1Cl)C2=C(C=C(C=C2Cl)Cl)Cl)Cl)Cl	0
889	CCCN1C2=C(C(=O)N(C1=O)CCC)NC(=N2)C34CCC(CC3)(CC4)CCC(=O)O	0.1
890	CC(C)(C)C1=NN=C(S1)N(C)C(=O)NC	0.4172
891	CC(C)C1=CC=C(C=C1)NC(=O)N(C)C	0.258
892	CCC1=CC=CC(=C1N(COCC)C(=O)CCl)C	0.1598
893	C1=CC=C(C=C1)C(=O)NCCC(=O)O	0.17
894	CN1C(=NN=N1)SCC2=C(N3[C@@H]([C@@H](C3=O)NC(=O)[C@@H](C4=CC=CC=C4)O)SC2)C(=O)O	0.25
895	C1=CC=C2C(=C1)C(OS2(=O)=O)(C3=CC=C(C=C3)O)C4=CC=C(C=C4)[O-].[Na+]	0.0878
896	CC1=CC(=NO1)NC(=O)C2=C(C3=CC=CC=C3S(=O)(=O)N2C)O	0.035
897	CCC(O)OCCCOC	0.8901
898	CC1([C@@H](N2[C@H](S1)[C@@H](C2=O)NC(=O)[C@@H](C3=CSC=C3)C(=O)O)C(=O)O)C	0.55
899	C1=C(C(=CC(=C1Cl)Cl)Cl)C2=CC(=C(C=C2Cl)Cl)Cl	0
900	CC(C)N(CC1=CC=CC=C1)C(=O)C(C)(C)C	0.2267
901	C1=CC(=C(C(=C1)F)C(=O)NC(=O)NC2=CC=C(C=C2)Cl)F	0.0308
902	C(C(C(C(F)(F)S(=O)(=O)O)(F)F)(F)F)(C(C(F)(F)F)(F)F)(F)F	0.001342
903	C=CCOC(CN1C=CN=C1)C2=C(C=C(C=C2)Cl)Cl	0.02956
904	COP(=O)(OC)SCN1C2=C(C=C(C=N2)Cl)OC1=O	0.553
905	CO[C@@]1([C@@H]2N(C1=O)C(=C(CS2)COC(=O)N)C(=O)O)NC(=O)CC3=CC=CS3	0.73
906	CCC[C@@H]1CC(=O)N(C1)[C@@H](CC)C(=O)N	0.825
907	CN1CC[C@@]23C=C[C@@H](C[C@@H]2OC4=C(C=CC(=C34)C1)OC)O	0.83
908	C[C@H]1[C@H]2CC3=C([C@@]1(CCN2CC=C(C)C)C)C=C(C=C3)O	0.39
909	CC1(C(=[N+](C2=C1C3=CC=CC=C3C=C2)CCCCS(=O)(=O)[O-])/C=C/C=C/C=C/C=C/4\C(C5=C(N4CCCCS(=O)(=O)[O-])C=CC6=CC=CC=C65)(C)C)C.[Na+]	0.05
910	COC1=C(C=CC(=C1)CCC(=O)CC(=O)CCC2=CC(=C(C=C2)O)OC)O	0.0501
911	CN1CCN(CC1)C2=CC=CC=C2/C=C\3/C(=O)N(CCS3)C4=CC(=C(C=C4)Cl)Cl	0.0329
912	CO/N=C(\C1=CC=CC=C1OC2=C(C(=NC=N2)OC3=CC=CC=C3Cl)F)/C4=NOCCO4	0.0362
913	C1[C@@H]2C[C@@H]2N([C@@H]1C#N)C(=O)[C@H](C34CC5CC(C3)CC(C5)(C4)O)N	1
914	CCN(CC)CCNC(=O)C1=CC(=C(C=C1OC)N)Cl	0.6
915	CC1=NS(=O)(=O)C2=C(N1)C=CC(=C2)Cl	0.06
916	C1CCC2(C1)CC(=O)N(C(=O)C2)CCCCN3CCN(CC3)C4=NC=CC=N4	0.05
917	CCCN(CC)C(CC)C(=O)NC1=C(C=CC=C1C)C	0.06
918	C1COCC(=O)N1C2=CC=C(C=C2)N3C[C@@H](OC3=O)CNC(=O)C4=CC=C(S4)Cl	0.06
919	CC(C)NC(=O)N1CC(=O)N(C1=O)C2=CC(=CC(=C2)Cl)Cl	0
920	C1=NC(=NN1[C@H]2[C@@H]([C@@H]([C@H](O2)CO)O)O)C(=O)N	1
921	CCOP(=S)(OCC)OP(=S)(OCC)OCC	0.0206
922	CC(CCC1=CC=CC=C1)NCC(C2=CC(=C(C=C2)O)C(=O)N)O	0.5
923	C1=CC=C(C=C1)C(C2=CC=C(C=C2)Cl)C(=O)C3C(=O)C4=CC=CC=C4C3=O	2.44e-08
924	CC1([C@@H](N2[C@H](S1)[C@@H](C2=O)NC(=O)[C@@H](C3=CC=CC=C3)NC(=O)N4CCNC4=O)C(=O)O)C	0.65
925	CN(C)CC1=NN=C2N1C3=C(C=C(C=C3)Cl)C(=NC2)C4=CC=CC=C4	0.31
926	CCCCCCCCCCNCCN[C@]1(C[C@@H](O[C@H]([C@H]1O)C)O[C@@H]2[C@H]([C@@H]([C@H](O[C@H]2OC3=C4C=C5C=C3OC6=C(C=C(C=C6)[C@H]([C@H](C(=O)N[C@H](C(=O)N[C@H]5C(=O)N[C@@H]7C8=CC(=C(C=C8)O)C9=C(C(=C(C=C9[C@H](NC(=O)[C@H]([C@@H](C1=CC(=C(O4)C=C1)Cl)O)NC7=O)C(=O)O)O)CNCP(=O)(O)O)O)CC(=O)N)NC(=O)[C@@H](CC(C)C)NC)O)Cl)CO)O)O)C	0.07
927	C1=CC=C(C=C1)OC2=CC=CC(=C2)C(=O)O	0.00716
928	C1[C@@H]([C@H]([C@@H]([C@H]([C@@H]1NC(=O)[C@H](CCN)O)O[C@@H]2[C@@H]([C@H]([C@@H]([C@H](O2)CO)O)N)O)O)O[C@@H]3[C@@H]([C@H]([C@@H]([C@H](O3)CN)O)O)O)N	0.88
929	CCCC(=O)NC1=CC(=C(C=C1)OCC(CNC(C)C)O)C(=O)C	0.74
930	C(C(C(F)(F)S(=O)(=O)O)(F)F)(C(F)(F)F)(F)F	0.01933
931	C(=O)(C(C(C(C(C(C(F)(F)F)(F)F)(F)F)(F)F)(F)F)(F)F)O	0.00164
932	C(=O)(C(C(C(C(C(C(C(C(F)(F)F)(F)F)(F)F)(F)F)(F)F)(F)F)(F)F)(F)F)O	0.000992
933	CC1=NN=C(N1C2C[C@H]3CC[C@@H](C2)N3CC[C@@H](C4=CC=CC=C4)NC(=O)C5CCC(CC5)(F)F)C(C)C	0.25
934	C1CN(P(=O)(OC1)NCCCl)CCCl	1
935	C[C@H]1C[C@H]2[C@@H]3CCC4=CC(=O)C=C[C@@]4([C@]3([C@H](C[C@@]2([C@]1(C(=O)CO)O)C)O)F)C	0.36
936	C[C@H]1C[C@@H](CN(C1)C2=C(C3=C(C=C2)C(=O)C(=CN3C4CC4)C(=O)O)OC)N	0.84
937	C1=CC=C(C=C1)N2C=C(C=C(C2=O)C3=CC=CC=C3C#N)C4=CC=CC=N4	0.05
938	CC1=CC=CC=C1OCC(CNCCOC2=CC=C(C=C2)C(=O)N)O	0.089
939	C(=O)(C(C(C(C(C(C(C(F)(F)F)(F)F)(F)F)(F)F)(F)F)(F)F)(F)F)[O-].[NH4+]	0.00363
940	C1CCN(CC1)C2=NC(=N)N(C(=C2)N)O	1
941	CCCCN1CCCCC1C(=O)NC2=C(C=CC=C2C)C	0.056
942	C1=CC(=C(C(=C1Cl)C2=C(C=CC(=C2Cl)Cl)Cl)Cl)Cl	0
943	CN(C)CCCN(C)CCCN(C)C	0.0383
944	C(C(C(C(F)(F)S(=O)(=O)[O-])(F)F)(F)F)(C(C(F)(F)F)(F)F)(F)F.[K+]	0.001342
945	CC1=C(N2[C@@H]([C@@H](C2=O)NC(=O)[C@@H](C3=CCC=CC3)N)SC1)C(=O)O	0.95
946	CCN1C=C(C(=O)C2=C1N=C(C=C2)C)C(=O)O	0.749
947	C[C@@H]1C[C@@H]([C@H]([C@@H](O1)O[C@H]2[C@H](C[C@@]3(CO3)C(=O)[C@@H]([C@H]([C@H]([C@H](OC(=O)[C@@H]([C@H]([C@@H]2C)O[C@H]4C[C@@H]([C@H]([C@@H](O4)C)O)OC)C)C)C)O)C)C)O)N(C)C	0.4
948	CC(C)NCC(C1=CC=C(C=C1)NS(=O)(=O)C)O	0.62
949	CC1(C(C1(C)C)C(=O)OC(C#N)C2=CC(=CC=C2)OC3=CC=CC=C3)C	0.00458
950	CCOC(=O)C1=C(NC(=C(C1C2=CC(=CC=C2)[N+](=O)[O-])C(=O)OC)C)C	0.02
951	CC1=C(C(=O)OC2=C1C=CC(=C2)OCCCN3CCN(CC3)CC4=CC=C(C=C4)Cl)C	0.05
952	C1=CC=C(C=C1)C2=NC3=C(N=C(N=C3N=C2N)N)N	0.333
953	C1=NC2=C(N1CCC(CO)CO)N=C(NC2=O)N	0.84
954	CCCCCCOC1=CC=C(C=C1)N	0.0252
955	C(CN)C(O)(P(=O)(O)O)P(=O)(O)O	0.7
956	COC(=O)[C@@H]([C@H]1CCCCN1)C2=CC=CC=C2	0.87
957	CCC(CC)NC1=C(C=C(C(=C1[N+](=O)[O-])C)C)[N+](=O)[O-]	0
958	CC1=C(C2=CC=CC=C2N1)CCNCC3=CC=C(C=C3)/C=C/C(=O)NO	0.1
959	C1=CC=C2C(=C1)C(=CN2)CCN(CCO)CC3=CC=C(C=C3)/C=C/C(=O)NO	0.23
960	COC1=C(C=C(C(=C1)O)C(=O)C2=CC=CC=C2)S(=O)(=O)O	0.00942
961	CC(C1=CC=C(C=C1)C(=O)C2=CC=CS2)C(=O)O	0.006
962	CCN(CC)CCNC(=O)C1=CC(=C(C=C1OC)N)Br	0.6
963	CCCN1C2=C(C(=O)NC1=O)NC=N2	0.55
964	CCC1=C2C(=CC=C1)C3=C(N2)C(OCC3)(CC)CC(=O)O	0.008
965	CN1CCC2=C3[C@H]1CC4=C(C3=CC=C2)C(=C(C=C4)O)O.CN1CCC2=C3[C@H]1CC4=C(C3=CC=C2)C(=C(C=C4)O)O.O.Cl.Cl	0.0723
966	CC1=NN=C(C(=O)N1N)C2=CC=CC=C2	0.693
967	C1=CC=C(C=C1)NS(=O)(=O)C2=CC=CC(=C2)/C=C/C(=O)NO	0.06
968	CC1=C(C=CC(=C1)F)[C@H]2C[C@H](CCN2C(=O)N(C)[C@H](C)C3=CC(=CC(=C3)C(F)(F)F)C(F)(F)F)N4CCN(CC4)C(=O)C	1
969	CCNS(=O)(=O)C(C(C(C(C(C(C(C(F)(F)F)(F)F)(F)F)(F)F)(F)F)(F)F)(F)F)(F)F	5.11e-08
970	C1CC(C1)(C(=O)O)C(=O)O.[NH2-].[NH2-].[Pt+2]	1
971	CC1=C(C(=CC=C1)C)NC(=O)C(C)N	0.87
972	CC1([C@@H](N2[C@H](S1)[C@@H](C2=O)NC(=O)[C@@H](C3=CC=CC=C3)S(=O)(=O)O)C(=O)O)C	0.5
973	CC(C)(COC(=O)C1=CC=CC=C1)COC(=O)C2=CC=CC=C2	0.7388
974	C1CN=C(N1)NC2=C(C=CC=C2Cl)Cl	0.56
975	CC(C)(C)NCC(COC1=CC=CC2=C1C[C@@H]([C@@H](C2)O)O)O	0.14
976	CC(=O)O[C@@H]1[C@@H](SC2=CC=CC=C2N(C1=O)CCN(C)C)C3=CC=C(C=C3)OC	0.198
977	C1CC[C@]2([C@H]3CC4=C([C@]2(C1)CCN3CC5CCC5)C=C(C=C4)O)O	0.17
978	CCOP(=S)(OCC)OC1=NN(C(=N1)Cl)C(C)C	0.06539
979	CC(=O)[C@]1(CC[C@@H]2[C@@]1(CC[C@H]3[C@H]2C=C(C4=CC(=O)[C@@H]5C[C@@H]5[C@]34C)Cl)C)OC(=O)C	0.0584
980	COC1=CC(=C(C=C1)OC)C(CNC(=O)CN)O	0.7
981	CCOC1=C(C=CC(=C1)OC2=C(C=C(C=C2)C(F)(F)F)Cl)[N+](=O)[O-]	0.1218
982	C1[C@@H]([C@H](O[C@H]1N2C=NC3=C(N=C(N=C32)Cl)N)CO)O	0.9848
983	CC[C@@]12CCCN3[C@@H]1C4=C(CC3)C5=CC=CC=C5N4C(=C2)C(=O)OCC	0.02
984	CC(C)(C)C(=O)C(N1C=NC=N1)OC2=CC=C(C=C2)Cl	0.1142
985	C(C(F)(F)F)(C(F)(F)F)F	0.4582
986	CN1CCN(CC1)C(=O)OC2C3=NC=CN=C3C(=O)N2C4=NC=C(C=C4)Cl	0.2
987	CN1C(=CC(=[N+]1C)C2=CC=CC=C2)C3=CC=CC=C3.COS(=O)(=O)[O-]	0.8513
988	CCCCOC1=CC=C(C=C1)N	0.165
989	CCC(C1=CC=CC=C1)C2=C(C3=CC=CC=C3OC2=O)O	0.57
990	CCC(=O)N(C1CCN(CC1)CCC2=CC=CC=C2)C3=CC=CC=C3	0.16
991	COC(=O)C1=CC=CC=C1C(=O)O	0.372
992	CCCCC(CC)COC(=O)C1=CC=CC=C1C(=O)O	0.352
993	CN1C(=O)CN=C(C2=C1C=CC(=C2)Cl)C3=CC=CC=C3	0.013
994	C1COCCN1C=O	0.9528
995	CN(C)C(=O)[C@@H]1C[C@H](CN1[C@]2(C3=C(C=CC(=C3)Cl)N(C2=O)S(=O)(=O)C4=C(C=C(C=C4)OC)OC)C5=CC=CC=C5OC)O	0.0608
996	CC1=CC(=O)/C(=C(/C)\[O-])/C(=O)O1.[Na+]	0.062
998	CC1=NC=C(N1CCO)[N+](=O)[O-]	0.96
999	CC1=C(C=C(C=C1)NC2=NC=CC(=N2)N(C)C3=CC4=NN(C(=C4C=C3)C)C)S(=O)(=O)N	0.01
1000	C[C@H]1C[C@@H]2[C@H]([C@H]([C@]3(O2)CC[C@H]4[C@@H]5CC=C6C[C@H](CC[C@@]6([C@H]5CC4=C3C)C)O)C)NC1	0.0741
1001	C[C@H](C(=O)O)OC1=CC(=C(C=C1)CNC(=O)C2=C(N=CC=C2)OC3=CC4=C(C=C3)OCO4)F	0.0414
1002	C1=CC(=CC=C1C2=COC3=CC(=CC(=C3C2=O)O)O)O	0.02426
1003	CN1C=NC(=C1SC2=NC=NC3=C2NC=N3)[N+](=O)[O-]	0.32
1004	COC1=C(C=CC(=C1)/C=C/C(=O)CC(=O)/C=C/C2=CC(=C(C=C2)O)OC)O	4.14e-08
1005	C1=CC(=CC(=C1)N(CC2=CN=CC=C2)C3=CC(=C(C=C3)OC(F)F)OC(F)F)C(=O)O	0.0142
1006	CCOC1=CC=C(C=C1)CC2=C(C=CC(=C2)[C@H]3[C@@H]([C@H]([C@@H]([C@H](O3)CO)O)O)O)Cl	0.09
1007	C=CCN1CC[C@]23[C@@H]4C(=O)CC[C@]2([C@H]1CC5=C3C(=C(C=C5)O)O4)O	0.559
1008	CN1CC[C@]23[C@@H]4[C@H]1CC5=C2C(=C(C=C5)O)O[C@H]3C(=O)CC4	0.86
1009	C[C@@H]1CC(=O)C=C2[C@]1(C[C@@H](CC2)C(=C)C)C	8.72e-08
1010	CCC(=O)O[C@](CC1=CC=CC=C1)(C2=CC=CC=C2)[C@H](C)CN(C)C	0.24
1011	CC1([C@@H](N2[C@H](S1)[C@@H](C2=O)NC(=O)C(C3=CC=CC=C3)C(=O)O)C(=O)O)C	0.52
1012	CC1=CC(=C(C(=C1C(=O)OC)O)C)O	0.0335
1013	CC(C)[C@@H](C(=O)N[C@H]1CC2=CC=CC=C2[C@H]3CCC[C@H](N3C1=O)C(=O)O)SC(=O)C	0.319
1014	C[C@]12CC[C@H]3C(=CCC4=C3C=CC(=C4)O)[C@@H]1CCC2=O	0.0583
1015	CN(C)C(=O)C1(CCN(CC1)CCC2(CN(CCO2)C(=O)C3=CC=CC=C3)C4=CC(=C(C=C4)Cl)Cl)N5CCCCC5	0.0127
1016	C1CC[N+]2(C1)[C@@H]3CC[C@H]2CC(C3)OC(=O)C(C4=CC=CC=C4)(C5=CC=CC=C5)O	0.33
1017	C[C@@H]1CCN(C[C@@H]1N(C)C2=NC=NC3=C2C=CN3)C(=O)CC#N	0.6
1018	C1=CC=C(C=C1)C2=CC(=O)C3=C(C=C(C=C3O2)O)O	0.00263
1019	CN1CCC2=C(C1)SC(=N2)C(=O)N[C@@H]3C[C@H](CC[C@@H]3NC(=O)C(=O)NC4=NC=C(C=C4)Cl)C(=O)N(C)C	0.5
1020	C1=CC=C2C(=C1)C=C(C3=CC=CC=C23)O	0.005435
1021	C1CN2C(=NN=C2C(F)(F)F)CN1C(=O)C[C@@H](CC3=CC(=C(C=C3F)F)F)N	0.62
1022	CN1[C@@H](CCC1=O)C2=CN=CC=C2	9.76e-07
1023	C1=CC(=CC=C1C2=COC3=C(C2=O)C=CC(=C3)O)O	0.0553
1024	C[C@]12CC[C@H]3[C@H]([C@@H]1CC[C@@H]2OP(=O)(O)O)CCC4=C3C=CC(=C4)OC(=O)N(CCCl)CCCl	0.5
1025	C1CC=CCCC=CCCC=C1	0.04143
1026	COC1=CC=C(C=C1)C2=COC3=CC(=CC(=C3C2=O)O)O	0.0203
1027	CCCCCCCC(=O)N[C@H](CN1CCCC1)[C@@H](C2=CC3=C(C=C2)OCCO3)O	0.21
1028	CN(C)C1=CC=C(C=C1)N=NC2=CC=CC=C2C(=O)O	0.0304
1029	CC(C)OC(=O)C(C)(C)OC1=CC=C(C=C1)C(=O)C2=CC=C(C=C2)Cl	0.00815
1030	C[C@@H]1C[C@H]2[C@@H]3CCC4=CC(=O)C=C[C@@]4([C@]3([C@H](C[C@@]2([C@]1(C(=O)CO)O)C)O)F)C	0.32
1031	CC(CC1=CC(=C(C=C1)O)O)C(C)CC2=CC(=C(C=C2)O)O	7.14e-08
1032	CCC1(C(=O)NC(=O)NC1=O)C2=CC=CC=C2	0.49
1033	CC1=C(N=C(O1)C2=CC=CC=C2)CCOC3=CC=CC4=C3C=CN4CCC(=O)O	0.00409
1034	C1=CC(=CC=C1/C=C/C2=CC(=CC(=C2)O)O)O	5.86e-08
1035	C1CNP(=O)(OC1)N(CCCl)CCCl	0.87
1036	C[C@]12CCC(=O)C=C1CC[C@@H]3[C@@H]2[C@H](C[C@]4([C@H]3CC[C@@H]4C(=O)CO)C)O	0.137
1037	C[C@]12CCC(=O)C=C1CC[C@@H]3[C@@H]2[C@H](C[C@]4([C@H]3CC[C@@]4(C(=O)CO)O)C)O	0.2
1038	C[C@]12C[C@@H]([C@H]3[C@H]([C@@H]1CC[C@@]2(C(=O)CO)O)CCC4=CC(=O)C=C[C@]34C)O	0.25
1039	C[C@]12CC[C@H]3[C@H]([C@@H]1CC[C@@H]2O)CCC4=C3C=CC(=C4)O	4.95e-06
1040	C1=CC(=CC=C1C(C2=CC=C(C=C2)Cl)C(Cl)(Cl)Cl)Cl	3.6e-08
1041	C1=CC(=C(C(=C1)Cl)COCCOCCCCCCNC[C@@H](C2=CC(=C(C=C2)O)CO)O)Cl	0.06
1042	C1=CC=C2C3=C4C(=CC2=C1)C=CC5=C4C(=CC=C5)C=C3	0.3826
1043	C1CC(=O)NC(=O)C1N2C(=O)C3=CC=CC=C3C2=O	0.4
1044	COC1=CC=C(C=C1)N2C3=C(CCN(C3=O)C4=CC=C(C=C4)N5CCCCC5=O)C(=N2)C(=O)N	0.13
1045	CN1[C@H]2CC[C@@H]1[C@H]([C@H](C2)OC(=O)C3=CC=CC=C3)C(=O)OC	0.12
1046	CC1=C(N2[C@@H]([C@@H](C2=O)NC(=O)[C@@H](C3=CC=C(C=C3)O)N)SC1)C(=O)O	0.39
1047	C1=CN=CC=C1N	1
1048	C1=NC2=C(N1)C(=S)N=CN2	0.85
1049	CC1(C(=O)N(C(=O)O1)C2=CC(=CC(=C2)Cl)Cl)C=C	0.5936
1050	CNCCCN1C2=CC=CC=C2CCC3=CC=CC=C31	0.18
1051	CN(C)CCC=C1C2=CC=CC=C2CCC3=CC=CC=C31	0.05
1052	CN(C)CCCN1C2=CC=CC=C2CCC3=CC=CC=C31	0.1
1053	CC(C)NC[C@H](COC1=CC=CC2=CC=CC=C21)O	0.16
1054	CN1CCCCC1CCN2C3=CC=CC=C3SC4=C2C=C(C=C4)SC	0.0217
1055	CN(C)CCCN1C2=CC=CC=C2SC3=C1C=C(C=C3)Cl	0.05
1056	CO[C@H]1[C@@H](C[C@@H]2CN3CCC4=C([C@H]3C[C@@H]2[C@@H]1C(=O)OC)NC5=C4C=CC(=C5)OC)OC(=O)C6=CC(=C(C(=C6)OC)OC)OC	0.005994
1057	C1=CC(=C(C=C1C(F)(F)F)Cl)OC2=CC(=C(C=C2)[N+](=O)[O-])C(=O)O	0.0111
1058	C1C(=C(N2[C@H](S1)[C@@H](C2=O)NC(=O)CC3=CC=CS3)C(=O)[O-])C[N+]4=CC=CC=C4	0.8
1059	C1=CC(=C(C=C1[N+](=O)[O-])Cl)NC(=O)C2=C(C=CC(=C2)Cl)O	0
1060	CC(=O)O[C@H]1C[C@@H]2CC[C@@H]3[C@@H]([C@]2(C[C@@H]1N4CCCCC4)C)CC[C@]5([C@H]3C[C@@H]([C@@H]5OC(=O)C)[N+]6(CCCCC6)C)C.[Br-]	0.25
1061	CC(=O)OC1=CC=CC=C1C(=O)O	0.532
1062	C([C@@H]([C@@H]1C(=C(C(=O)O1)O)O)O)O	0.26
1063	CC1=CC(=C(C=C1)SC2=CC=CC=C2N3CCNCC3)C	0.02
1064	CC1=C(C(=CC=C1)NC2=CC(=NC(=N2)SCC(=O)O)Cl)C	0.005454
1065	CCN(CC)C1=CC2=C(C=C1)C3(C4=C(O2)C=C(C=C4)N(CC)CC)C5=CC=CC=C5C(=O)O3	0.0456
1066	CCC1(C(=O)NC(=O)NC1=O)C2=CCCCCC2	0.62
1067	CCCCOCCOCCOCC1=CC2=C(C=C1CCC)OCO2	0
1068	CCN(CC)CCNC(=O)C1=CC=C(C=C1)N	0.84
1069	C[C@@]1(C(=O)N2[C@H](C(=O)N3CCC[C@H]3[C@@]2(O1)O)CC4=CC=CC=C4)NC(=O)[C@@H]5C[C@H]6[C@@H](CC7=CNC8=CC=CC6=C78)N(C5)C	0.07
1070	C[N+]1=CC=CC=C1/C=N/O.[Cl-]	1
1071	C1=C(C(=O)NC(=O)N1)F	0.64
1072	CCC1=CC=CC(=C1N(C(C)COC)C(=O)CCl)C	0.1773
1073	CN1C(=NC(=O)N(C1=O)C2CCCCC2)N(C)C	0.613
1074	C1=CC=C(C=C1)NC2=C(C=C(C=C2)S(=O)(=O)NC3=CC=CC=C3)[N+](=O)[O-]	0
1075	COC1=C(C=CC(=C1)NS(=O)(=O)C)NC2=C3C=CC=CC3=NC4=CC=CC=C42	0.029
1076	C1=CC(=C(C=C1[N+](=O)[O-])[N+](=O)[O-])O	0.02723
1077	CC(C)NCC(C1=CC(=C(C=C1)O)O)O.Cl	0.609
1078	C1CN=C(N1)NC2=C(C=CC3=NSN=C32)Cl	0.7
1079	CCCC1O[C@@H]2C[C@H]3[C@@H]4CCC5=CC(=O)C=C[C@@]5([C@H]4[C@H](C[C@@]3([C@@]2(O1)C(=O)CO)C)O)C	0.13
1080	CC(C(=O)OC)OC1=CC=C(C=C1)OC2=C(C=C(C=C2)Cl)Cl	0
1081	CN1[C@@H]2CC(C[C@H]1[C@H]3[C@@H]2O3)OC(=O)[C@H](CO)C4=CC=CC=C4	0.9
1082	CC(C)NCC(COC1=CC=C(C=C1)CCOC)O	0.883
1083	C1CCN(CC1)CCC(C2CC3CC2C=C3)(C4=CC=CC=C4)O	0.097
1084	CC1=C(N=CN1)CSCCNC(=NC)NC#N	0.78
1085	CC1([C@@H](N2[C@H](S1)[C@@H](C2=O)NC(=O)[C@@H](C3=CC=CC=C3)NC(=O)N4CCN(C4=O)S(=O)(=O)C)C(=O)O)C	0.7
1086	C1=C(C=C(C(=C1I)OC2=CC(=C(C(=C2)I)O)I)I)C[C@@H](C(=O)O)N	2.42e-08
1087	C[N+]1(CCC2=CC(=C3C=C2[C@@H]1CC4=CC=C(C=C4)OC5=C6[C@@H](CC7=CC(=C(C=C7)OC)O3)[N+](CCC6=CC(=C5OC)OC)(C)C)OC)C	0.65
1088	CCCC1=CC(=O)NC(=S)N1	0.4736
1089	CN1[C@@H]2CC[C@H]1CC(C2)OC(=O)C(CO)C3=CC=CC=C3	0.61
1090	C1=CC(=C(C=C1CCN)O)O	0.87
1091	C1C(=C(N2[C@H](S1)[C@@H](C2=O)NC(=O)[C@@H](C3=CC=C(C=C3)O)N)C(=O)O)CSC4=NNN=C4	0.4
1092	C[C@@H](CC1=CC=CC=C1)N	0.8
1093	C1=CC=C(C=C1)NC(=O)NC2=CN=NS2	0.02837
1094	COC1=C(N2[C@@H]([C@@H](C2=O)NC(=O)[C@@H](C3=CCC=CC3)N)SC1)C(=O)O	0.1
1095	CCN1C=C(C(=O)C2=CN=C(N=C21)N3CCNCC3)C(=O)O	0.7
1096	C1=CC(=CC=C1C2=CC(=O)C3=C(C=C(C=C3O2)O)O)O	9.57e-05
1097	C[C@]12CCC(=O)C[C@@H]1CC[C@@H]3[C@@H]2CC[C@]4([C@H]3CC[C@@H]4O)C	0.0313
1098	CC1=C(C=CC2=C1C(=NC(=N2)N)N)CNC3=CC(=C(C(=C3)OC)OC)OC	0.05
1099	C1CN1P(=S)(N2CC2)N3CC3	0.9
1100	CCOC(=O)C(=C(C1=CC=CC=C1)C2=CC=CC=C2)C#N	0.007005
1101	CC1=C(SCCO1)C(=O)NC2=CC=CC=C2	0.175
1102	C1=CC(=C(C(=C1C(=O)C2=CC(=C(C(=C2)O)O)O)O)O)O	1.93e-08
1103	C[C@]([C@H]1C[C@@]23CC[C@@]1([C@H]4[C@@]25CCN([C@@H]3CC6=C5C(=C(C=C6)O)O4)CC7CC7)OC)(C(C)(C)C)O	0.04
1104	CC1=C(C(=NO1)C2=C(C=CC=C2Cl)F)C(=O)N[C@H]3[C@@H]4N(C3=O)[C@H](C(S4)(C)C)C(=O)O	0.043
1105	CC(C)C(CCCN(C)CCC1=CC(=C(C=C1)OC)OC)(C#N)C2=CC(=C(C=C2)OC)OC	0.1
1106	CC(C)NCC(COC1=CC=CC2=CC=CC=C21)O	0.282
1107	CC1(C(C1C(=O)OCC2=CC(=CC=C2)OC3=CC=CC=C3)C=C(Cl)Cl)C	1.89e-08
1108	CC(C)([C@H](C(=O)O)N)S	0.12
1109	COP(=O)(C(C(Cl)(Cl)Cl)O)OC	0.696
1110	CC1=CC(=C(C(=C1)C)O)C	0.109
1111	C1CN2CCC1[C@H](C2)NC(=O)C3=CC4=C(C=C3)OCCO4	1
1112	CC(C)(C(=O)NC1=CC(=C(C=C1)[N+](=O)[O-])C(F)(F)F)O	0.166
1113	C1=CC=C(C(=C1)[N+](=O)[O-])[N+](=O)[O-]	0.06949
1114	C1CN(CCC1(C2=CC=C(C=C2)Cl)O)CCCC(=O)C3=CC=C(C=C3)F	0.1784
1115	CC1([C@H]([C@H]1C(=O)O[C@H](C#N)C2=CC(=CC=C2)OC3=CC=CC=C3)C=C(Br)Br)C	0.01
1116	CCOC(=O)[C@@H]1[C@H]2CC[C@H](N2C)C[C@@H]1OC(=O)C3=CC=CC=C3	0.64
1117	C[C@]12CC(=O)[C@H]3[C@H]([C@@H]1CC[C@@]2(C(=O)CO)O)CCC4=CC(=O)C=C[C@]34C	0.4818
1118	CC1=CC(=NC(=N1)NC2=CC=CC=C2)C	0.01673
1119	C1=CC2=C3C(=C1)C=CC4=C(C=CC(=C43)C=C2)O	8.43e-06
1120	C[C@]12CC[C@H]3[C@H]([C@@H]1CCC2=O)CCC4=C3C=CC(=C4)O	0.0308
1121	C1CCN[C@H](C1)[C@H](C2=CC(=NC3=C2C=CC=C3C(F)(F)F)C(F)(F)F)O	0.02
1122	C1CN=C(N1)C2CC2(C3=CC=CC=C3)C4=CC=CC=C4	0.5
1123	CC1=C(SC=N1)CCCl	0.36
1124	CN1CN(C(=S)SC1)C	0.8914
1125	CC1=CC(=CC(=C1O)[N+](=O)[O-])[N+](=O)[O-]	0.002637
1126	C[C@]12CCCCC[C@H]([C@@H]1N)CC3=C2C=C(C=C3)O	0.08
1127	CCNC(=O)[C@@H]1CCCN1C(=O)[C@H](CCCN=C(N)N)NC(=O)[C@H](CC(C)C)NC(=O)[C@@H](CC(C)C)NC(=O)[C@H](CC2=CC=C(C=C2)O)NC(=O)[C@H](CO)NC(=O)[C@H](CC3=CNC4=CC=CC=C43)NC(=O)[C@H](CC5=CN=CN5)NC(=O)[C@@H]6CCC(=O)N6	0.54
1128	CC(C1=CC2=C(C=C1)C3=C(N2)C=CC(=C3)Cl)C(=O)O	0.001
1129	C[C@@H](CC1=CC=CC=C1)NC	0.85
1130	CC1=C(C2=C(N1C(=O)C3=CC=C(C=C3)Cl)C=CC(=C2)OC)CC(=O)O	0.0103
1131	C1[C@@H]([C@H](O[C@H]1N2C=NC3=C2NC=NC[C@H]3O)CO)O	0.96
1132	CC[C@]12CC(=C)[C@H]3[C@H]([C@@H]1CC[C@]2(C#C)O)CCC4=CC(=O)CC[C@H]34	0.02
1133	CCN(CC)CCCC(C)NC1=C2C=CC(=CC2=NC=C1)Cl	0.43
1134	CCCNCC(COC1=CC=CC=C1C(=O)CCC2=CC=CC=C2)O	0.04
1135	CN1CCC[C@H]1C2=CN=CC=C2	0.406
1136	C1CCNC(C1)CNC(=O)C2=C(C=CC(=C2)OCC(F)(F)F)OCC(F)(F)F	0.52
1137	C1CC1C(C2CC2)NC3=NCCO3	0.9
1138	C1=COC(=C1)CNC2=CC(=C(C=C2C(=O)O)S(=O)(=O)N)Cl	0.012
1139	CCC1(CCCCN(C1)C)C2=CC(=CC=C2)O	0.73
1140	CCC1=CC=CC2=C1OC(=C2)C(CNC(C)(C)C)O	0.176
1141	CCOP(=S)(OCC)OC(C(Cl)(Cl)Cl)Cl	0.00394
1142	C1=CC(=CC=C1C(=O)N[C@@H](CCC(=O)O)C(=O)O)NCC2=CN=C3C(=N2)C(=NC(=N3)N)N	0.75
1143	COCCCC/C(=N\OCCN)/C1=CC=C(C=C1)C(F)(F)F	0.2
1144	C1=CN=CC=C1C(=O)NN	1
1145	CN(C)C1=CC=C(C=C1)C(=C2C=CC(=[N+](C)C)C=C2)C3=CC=C(C=C3)N(C)C.[Cl-]	0.01384
1146	CNCCC(C1=CC=CC=C1)OC2=CC=C(C=C2)C(F)(F)F	0.13
1147	CC/C(=C(\C1=CC=CC=C1)/C2=CC=C(C=C2)OCCN(C)C)/C3=CC=CC=C3.C(C(=O)O)C(CC(=O)O)(C(=O)O)O	0.0012
1148	C=C1CC[C@]2([C@H]3CC4=C5[C@]2([C@H]1OC5=C(C=C4)O)CCN3CC6CC6)O	0.65
1149	CC(C)(C)C(C(N1C=NC=N1)OC2=CC=C(C=C2)Cl)O	0.1258
1150	C[C@H](C1=CC(=CC(=C1)C(F)(F)F)C(F)(F)F)OC[C@]2(CC[C@]3(CCC(=O)N3)CN2)C4=CC=CC=C4	0.002
1151	CCN(CC(=C)C)C1=C(C=C(C=C1[N+](=O)[O-])C(F)(F)F)[N+](=O)[O-]	0
1152	CCCCN(CCCC)SN(C)C(=O)OC1=CC=CC2=C1OC(C2)(C)C	0
1153	CC1=C(S(=O)(=O)CCS1(=O)=O)C	0.937
1154	C1=CN=CC=C1C2=CC=NC=C2	0.319
1155	C1=C(C(=NC(=C1Cl)Cl)OCC(=O)O)Cl	0.02237
1156	CC1=C(C=CC(=C1)OP(=S)(OC)OC)SC	0
1157	CCCCNC(=O)OCC#CI	0.719
1158	CC(=O)C[C@@H](C1=CC=CC=C1)C2=C(C3=CC=CC=C3OC2=O)O	0.011
1159	CC(=O)C[C@H](C1=CC=CC=C1)C2=C(C3=CC=CC=C3OC2=O)O	0.023
1160	C[C@](CC1=CC(=C(C=C1)O)O)(C(=O)O)N	0.85
1161	C(C(CO[N+](=O)[O-])O[N+](=O)[O-])O[N+](=O)[O-]	0.4
1162	COC1=CC(=C(C(=C1)OC)C(=O)CCCN2CCCC2)OC	0.4
1163	C1CCN(C1)C2=C(C(=CC(=C2)C(=O)O)S(=O)(=O)N)OC3=CC=CC=C3	0.058
1164	CS(=O)(=O)OCCCCOS(=O)(=O)C	1
1165	COP(=S)(OC)OC1=NC(=C(C=C1Cl)Cl)Cl	0
1166	CC1=C(C(C(=C(N1)C)C(=O)OCCN(C)CC2=CC=CC=C2)C3=CC(=CC=C3)[N+](=O)[O-])C(=O)OC	0.084
1167	CCC(=O)N(C1=CC=CC=C1)C2(CCN(CC2)CCC3=CC=CS3)COC	0.075
1168	CC1=CC(=CC=C1)NC2=C(C=NC=C2)S(=O)(=O)NC(=O)NC(C)C	0.01
1170	CC1(C(=O)NC(=O)N(C1=O)C)C2=CCCCC2	0.53
1171	CCOP(=S)(OCC)SCSP(=S)(OCC)OCC	2.03e-08
1172	CCN(CC)CC#CCOC(=O)C(C1CCCCC1)(C2=CC=CC=C2)O	0.0034
1173	CCOP(=S)(OCC)OC1=CC=C(C=C1)[N+](=O)[O-]	0.04
1174	CCN[C@@H]1C[C@@H]([C@H]([C@@H]([C@H]1O[C@@H]2[C@@H]([C@H]([C@@](CO2)(C)O)NC)O)O)O[C@@H]3[C@@H](CC=C(O3)CN)N)N	1
1175	C[C@H]1[C@@H]([C@H](C[C@@H](O1)O[C@H]2C[C@@](CC3=C2C(=C4C(=C3O)C(=O)C5=C(C4=O)C(=CC=C5)OC)O)(C(=O)CO)O)N)O	0.25
1176	C[C@@H]1[C@H]2[C@@H]([C@H]3[C@@H](C(=O)C(=C([C@]3(C(=O)C2=C(C4=C1C=CC=C4O)O)O)O)C(=O)N)N(C)C)O	0.12
1177	CC/C(=C(/CC)\C1=CC=C(C=C1)O)/C2=CC=C(C=C2)O	0.00935
1178	COC1=CC2=C(C=CN=C2C=C1)[C@@H]([C@H]3C[C@@H]4CCN3C[C@@H]4C=C)O	0.13
1179	C1=CC=C2C(=C1)C=CC3=CC4=CC=CC=C4C=C32	0.01121
1180	CCOP(=S)(OCC)OC1=CC2=C(C=C1)C(=C(C(=O)O2)Cl)C	2.9e-07
1181	C1=CC(=CC=C1[C@H]([C@@H](CO)NC(=O)C(Cl)Cl)O)[N+](=O)[O-]	0.34
1182	CN(C)C/C=C(/C1=CC=C(C=C1)Br)\C2=CN=CC=C2	0.086
1183	CN1C(=NN=N1)SCC2=C(N3[C@@H]([C@@](C3=O)(NC(=O)CSCC#N)OC)SC2)C(=O)O	0.15
1184	CC1(O[C@@H]2[C@H]([C@H](O[C@@H]2O1)[C@@H](CO)O)OCCCN(C)C)C.Cl	0.97
1185	C1C(O1)C(=O)N	0.98
1186	CC(=O)O.CC(=O)O.C1=CC(=CC=C1N/C(=N/C(=NCCCCCCN=C(/N=C(/NC2=CC=C(C=C2)Cl)\N)N)N)/N)Cl	0.00236
1187	COC1=CC=C(C=C1)C(=C(C2=CC=C(C=C2)OC)Cl)C3=CC=C(C=C3)OC	7.84e-07
1188	C1=CC(=N)C=CC1=C(C2=CC=C(C=C2)N)C3=CC=C(C=C3)N.Cl	0.235
1189	CCOC(=O)NC1=C(N=C(C=C1)NCC2=CC=C(C=C2)F)N	0.15
1190	COC1=CC=CC=C1N2CCN(CC2)CC(COC3=CC=CC4=CC=CC=C43)O	0.008
1191	CC[C@@]1(C[C@@H]2C[C@@](C3=C(CCN(C2)C1)C4=CC=CC=C4N3)(C5=C(C=C6C(=C5)[C@]78CCN9[C@H]7[C@@](C=CC9)([C@H]([C@@]([C@@H]8N6C=O)(C(=O)OC)O)OC(=O)C)CC)OC)C(=O)OC)O	0.4
1192	C1CN2CC3=CCO[C@H]4CC(=O)N5[C@H]6[C@H]4[C@H]3C[C@H]2[C@@]61C7=CC=CC=C75	0.457
1193	CN1CC[C@]23[C@@H]4[C@H]1CC5=C2C(=C(C=C5)O)O[C@H]3[C@H](C=C4)O	0.65
1194	CCC1(C(=O)NC(=NC1=O)[O-])C2=CC=CC=C2.[Na+]	0.247
1195	C1=CC=C(C=C1)C2(C(=O)NC(=O)N2)C3=CC=CC=C3	0.1624
1196	CCOC(=O)C1(CCN(CC1)C)C2=CC=CC=C2	0.42
1197	CCC1(C(=O)NC(=O)NC1=O)CCC(C)C	0.39
1198	CC(C)(C)NCC(COC1=CC=C(C=C1)NC(=O)NC2CCCCC2)O	0.39
1199	C[C@@]12CCN([C@@H]1N(C3=C2C=C(C=C3)OC(=O)NC)C)C	0.64
1200	CCCC(C)(COC(=O)N)COC(=O)N	1
1201	C[C@@]1([C@H]2C[C@H]3[C@@H](C(=O)C(=C([C@]3(C(=O)C2=C(C4=C(C=CC(=C41)Cl)O)O)O)O)C(=O)N)N(C)C)O	0.52
1202	CC1=C(C(=CC=C1)C)O	0.2086
1203	C[C@]12CC[C@H]3[C@H]([C@@H]1CC[C@]2(C#C)O)CCC4=C3C=CC(=C4)O	0.014
1204	CCCN(CCC)S(=O)(=O)C1=CC=C(C=C1)C(=O)O	0.13
1205	CC1=CC(=NC(=N1)NS(=O)(=O)C2=CC=C(C=C2)N)C	0.175
1206	C1=CC(=NC(=C1Cl)C(=O)O)Cl.C(CO)N	0.464
1207	CC1=NN=C2N1C3=C(C=C(S3)Br)C(=NC2)C4=CC=CC=C4Cl	0.092
1208	C1CN(CCC1N2C3=C(C=C(C=C3)Cl)NC2=O)CCCN4C5=CC=CC=C5NC4=O	0.082
1209	CC(=O)[C@H]1CC[C@@H]2[C@@]1(CC[C@H]3[C@H]2CCC4=CC(=O)CC[C@]34C)C	0.02311
1210	CC1=C(C(=CC=C1)C)N(C(C)C(=O)OC)C(=O)COC	0.7306
1211	CCC(=O)O[C@H]1CC[C@@H]2[C@@]1(CC[C@H]3[C@H]2CCC4=CC(=O)CC[C@]34C)C	3.71e-08
1212	CN1CCN(CC1)C2=NC3=C(C=CC(=C3)Cl)NC4=CC=CC=C42	0.05
1213	C[C@]12CC[C@H]3[C@H]([C@@H]1CC[C@H]2O)CCC4=C3C=CC(=C4)O	3.98e-05
1214	C[C@H]1[C@@]([C@H]([C@@H](O1)O[C@@H]2[C@H]([C@@H]([C@H]([C@@H]([C@H]2O)O)N=C(N)N)O)N=C(N)N)O[C@H]3[C@H]([C@@H]([C@H]([C@@H](O3)CO)O)O)NC)(C=O)O	0.65
1215	C[NH+]1CCC2=CC(=C3C=C2[C@@H]1CC4=CC=C(C=C4)OC5=C6[C@@H](CC7=CC(=C(C=C7)O)O3)[N+](CCC6=CC(=C5O)OC)(C)C)OC.[Cl-].[Cl-]	0.58
1216	C1=CC=C(C=C1)N2C(=O)C(C(=O)N2C3=CC=CC=C3)CCS(=O)C4=CC=CC=C4	0.017
1217	CCC1=C(C(=CC=C1)CC)N	0.08962
1218	CCNC(=O)NC(=O)/C(=N/OC)/C#N	0.437
1219	CC1=C2C=CC3=CC=CC=C3C2=C(C4=CC=CC=C14)C	0
1220	C1[C@@H]2N(C1=O)[C@H](/C(=C/CO)/O2)C(=O)O	0.91
1221	CN1CCC2=C3[C@H]1CC4=C(C3=CC=C2)C(=C(C=C4)O)O	0.05
1222	C1C(N(C2=C(N1)N=C(NC2=O)N)C=O)CNC3=CC=C(C=C3)C(=O)N[C@@H](CCC(=O)O)C(=O)O	0.087
1223	CN1C=NC2=C1C(=O)N(C(=O)N2C)C	1
1224	CCN(CC)C1=CC(=C(C=C1)C(=O)C2=CC=CC=C2C(=O)O)O	0.00517
1225	CCC1=C(C(=NC(=N1)N)N)C2=CC=C(C=C2)Cl	0.1177
1226	CC1=C(C(=O)N(N1C)C2=CC=CC=C2)N(C)C	1
1227	C[C@@]1(CO[C@@H]([C@@H]([C@H]1NC)O)O[C@H]2[C@@H](C[C@@H]([C@H]([C@@H]2O)O[C@@H]3[C@@H]([C@H]([C@@H]([C@H](O3)CN)O)O)O)N)NC(=O)[C@H](CN)O)O	0.95
1228	C[C@]12CCC(=O)C=C1CC[C@@H]3[C@@H]2CC[C@]4([C@H]3CC[C@]4(C)O)C	0.0329
1229	C[C@]12CC[C@H]3[C@H]([C@@H]1CC[C@@H]2O)CCC4=CC(=O)CC[C@]34C	0.057
1230	CN=C1CN(C(=C2C=C(C=CC2=N1)Cl)C3=CC=CC=C3)O	0.15
1231	C1CCN(CC1)C2=NC(=NC3=C2N=C(N=C3N4CCCCC4)N(CCO)CCO)N(CCO)CCO	0.009
1232	C1=CC=C2C(=C1)NC(=S)N2	0.4
1233	CN1CCN(CC1)CCCN2C3=CC=CC=C3SC4=C2C=C(C=C4)Cl	0.0027
1234	C1CN(CCN1CCCN2C3=CC=CC=C3SC4=C2C=C(C=C4)Cl)CCO	0.07
1235	CN(C)CCCN1C2=CC=CC=C2SC3=CC=CC=C31	0.11
1236	CC1=C(C(=O)CC1OC(=O)C2C(C2(C)C)C=C(C)C)CC=C	0.2902
1237	CC(C)(C)C1=CC(=CC=C1)O	0.116
1238	CN1C2=C(C(=O)N(C1=O)C)NC=N2	0.61
1239	CN1CCCC(CC1)N2C(=O)C3=CC=CC=C3C(=N2)CC4=CC=C(C=C4)Cl	0.17
1240	CC(C)NCC(C1=CC(=CC(=C1)O)O)O	0.9
1241	CN(C)CCOC(C1=CC=CC=C1)C2=CC=CC=C2	0.22
1242	COC1=C(C=C(C=C1)CC2=NC=CC3=CC(=C(C=C32)OC)OC)OC	0.073
1243	C1=CC=C(C=C1)NC(=O)CCl	0.401
1244	C1(C(C(C(C(C1Cl)Cl)Cl)Cl)Cl)Cl	0.0165
1245	C1NC2=CC(=C(C=C2S(=O)(=O)N1)S(=O)(=O)N)Cl	0.274
1246	C[C@H]1[C@H]([C@H](C[C@@H](O1)O[C@H]2C[C@@](CC3=C2C(=C4C(=C3O)C(=O)C5=CC=CC=C5C4=O)O)(C(=O)C)O)N)O	0.076
1247	C1[C@H]([C@@H]([C@H]([C@@H]([C@H]1N)O[C@@H]2[C@@H]([C@H]([C@@H]([C@H](O2)CN)O)O)O)O)O[C@@H]3[C@@H]([C@H]([C@@H]([C@H](O3)CO)O)N)O)N	0.99
1248	CC1=C(C(=O)N(C(=O)N1)C(C)(C)C)Cl	0.1029
1249	CN(CC1=CN=C2C(=N1)C(=NC(=N2)N)N)C3=CC=C(C=C3)C(=O)N[C@@H](CCC(=O)O)C(=O)O	0.432
1250	CC1=CC(=CC=C1)OCC(CNCCC2=CC(=C(C=C2)OC)OC)O	0.015
1251	CCCCCCCCCCCCN1CCCCCC1=O	0.00275
1252	C1=NC2=C(N1COCCO)N=C(NC2=O)N	0.85
1253	C1=CC(=CC=C1C(=O)N[C@@H](CCC(=O)O)C(=O)O)NCC2=CN=C3C(=N2)C(=O)NC(=N3)N	0.0436
1254	CN(CC1=NC2=C(N=C(N=C2NC1=O)N)N)C3=CC=C(C=C3)C(=O)N[C@@H](CCC(=O)O)C(=O)O	0.13
1255	C1=CC=C2C(=C1)N=CC(=N2)NS(=O)(=O)C3=CC=C(C=C3)N	0.0037
1256	CC1=NC=C2N1C3=C(C=C(C=C3)Cl)C(=NC2)C4=CC=CC=C4F	0.05
1257	C1C2=CN=C(N2C3=C(C=C(C=C3)Cl)C(=N1)C4=CC=CC=C4F)CO	0.1
1258	CC1=C(C=CC(=C1)O)Cl	0.0723
1259	CC(=O)NC1=NN=C(S1)S(=O)(=O)N	0.04
1260	C1=CC(=CN=C1)C(=O)O	0.594
1261	CC(C)N1CCC(CC1)N(C2=CC=C(C=C2)Cl)C(=O)CC3=CC=CC=C3	0.15
1262	CN(C)CCCC1(C2=C(CO1)C=C(C=C2)C#N)C3=CC=C(C=C3)F	0.2
1263	CN1C=C(C(=O)C(=C1)C2=CC(=CC=C2)C(F)(F)F)C3=CC=CC=C3	0.1378
1264	CN1C(=C(C2=C(S1(=O)=O)C=CS2)O)C(=O)NC3=CC=CC=N3	0.009
1265	CC[C@H]1C(=O)N(CC(=O)N([C@H](C(=O)N[C@H](C(=O)N([C@H](C(=O)N[C@H](C(=O)N[C@@H](C(=O)N([C@H](C(=O)N([C@H](C(=O)N([C@H](C(=O)N([C@H](C(=O)N1)[C@@H]([C@H](C)C/C=C/C)O)C)C(C)C)C)CC(C)C)C)CC(C)C)C)C)C)CC(C)C)C)C(C)C)CC(C)C)C)C	0
1266	C1=C(OC(=C1)[N+](=O)[O-])/C=N/NC(=O)N	0.856
1267	C1=CC(=C(C=C1C[C@@H](C(=O)O)N)O)O	0.76
1268	CC(C)(C1=CC=CC=C1)C2=CC=C(C=C2)O	0.0231
1269	C1=CC=NC(=C1)NS(=O)(=O)C2=CC=C(C=C2)N=NC3=CC(=C(C=C3)O)C(=O)O	0.004
1270	C1=C(N=C(S1)[C@H]2[C@@H]([C@@H]([C@H](O2)CO)O)O)C(=O)N	0.47
1271	C1=CC=C(C=C1)N=NC2=CC=C(C=C2)N	0.0171
1272	C1CCC(CC1)(CC(=O)O)CN	0.97
1273	C[C@@H](C(=O)NC1=C(C(=C(C(=C1I)C(=O)NC(CO)CO)I)C(=O)NC(CO)CO)I)O	1
1274	C1=CC=C(C(=C1)C(C2=CC=C(C=C2)Cl)(C3=CN=CN=C3)O)Cl	0.03671
1275	CC1=C(C(=CC=C1)[N+](=O)[O-])[N+](=O)[O-]	0.337
1276	CC(C)[N+]1([C@@H]2CC[C@H]1CC(C2)OC(=O)C(CO)C3=CC=CC=C3)C	0.95
1277	CCCC1COC(O1)(CN2C=NC=N2)C3=C(C=C(C=C3)Cl)Cl	0.0508
1278	CC[C@]12CC[C@H]3[C@H]([C@@H]1C=C[C@]2(C#C)O)CCC4=CC(=O)CC[C@H]34	0.023
1279	C(CCC(=O)O)CCN	0.92
1280	C1CCN(CC1)C(=O)N2CCN3C=C(C4=CC(=CC(=C43)C2)F)C5=C(C(=O)NC5=O)C6=CN=C7N6C=CC=C7	0.02
1281	C1=CC=C(C=C1)C2=NC(C(=O)NC3=C2C=C(C=C3)Cl)O	0.04
1282	CNC(=O)CSP(=S)(OC)OC	0.9649
1283	C[C@@]1([C@H]2C[C@H]3[C@@H](C(=O)C(=C([C@]3(C(=O)C2=C(C4=C1C=CC=C4O)O)O)O)C(=O)N)N(C)C)O	0.468
1284	C1CNP(=O)(OC1)N(CCCl)CCCl.O	0.772
1285	CC(C(C)(C)C)N=C(NC#N)NC1=CC=NC=C1	0.6
1286	CCCOC(C1=CC=CC=C1)(C2=CC=CC=C2)C(=O)OC3CCN(CC3)C	0.1
1287	C1[C@@H]2[C@H]3[C@@H]([C@H]1[C@H]4[C@@H]2O4)[C@]5(C(=C([C@@]3(C5(Cl)Cl)Cl)Cl)Cl)Cl	0.009376
1288	CC1=C(C=CC=C1[N+](=O)[O-])[N+](=O)[O-]	0.131
1289	C1=CN=CC=C1C2=CNC(=O)C(=C2)N	0.89
1290	C1C2=CC=CC=C2C3=C1C=C(C=C3)[N+](=O)[O-]	1
1291	CC1=CC(=O)N(N1C)C2=CC=CC=C2	0.97
1293	CCOC1=C(C=CC(=C1)[C@@H](CS(=O)(=O)C)N2C(=O)C3=C(C2=O)C(=CC=C3)NC(=O)C)OC	0.32
1294	C1(C(C(C(C(C1Cl)Cl)Cl)Cl)Cl)Cl	0.0174
1295	CC(CN1C2=CC=CC=C2SC3=CC=CC=C31)N(C)C	0.09
1296	C1C(=C(N2[C@H](S1)[C@@H](C2=O)NC(=O)CC3=CC=CC=C3CN)C(=O)O)CSC4=NN=NN4CC(=O)O	0.19
1297	C1C(=C(N2[C@H](S1)[C@@H](C2=O)NC(=O)[C@@H](C3=CC=CC=C3)O)C(=O)O)CSC4=NN=NN4CS(=O)(=O)O	0.02
1298	CC1=C(C=CC(=C1)C2=CC(=C(C=C2)N)C)N.Cl.Cl	0.115
1299	CC1([C@@H](N2[C@H](S1)[C@@H](C2=O)NC(=O)C3=C(C=CC=C3OC)OC)C(=O)O)C	0.43
1300	CC1([C@@H](N2[C@H](S1)[C@@H](C2=O)NC(=O)CC3=CC=CC=C3)C(=O)O)C	0.4
1301	CN1CCN2C(C1)C3=CC=CC=C3CC4=C2N=CC=C4	0.15
1302	COC1=C(C=C(C=C1)C2CC(=O)NC2)OC3CCCC3	0.11
1303	CCN1CCN(C(=O)C1=O)C(=O)N[C@H](C2=CC=CC=C2)C(=O)N[C@H]3[C@@H]4N(C3=O)[C@H](C(S4)(C)C)C(=O)O	0.5
1304	C[C@@]1([C@H]2[C@@H]([C@H]3[C@@H](C(=O)C(=C([C@]3(C(=O)C2=C(C4=C1C=CC=C4O)O)O)O)C(=O)N)N(C)C)O)O.O.O	0.3982
1305	CN(C)CCN1C(=NN=N1)SCC2=C(N3[C@@H]([C@@H](C3=O)NC(=O)CC4=CSC(=N4)N)SC2)C(=O)O	0.5
1306	CC(=O)N[C@@H](CS)C(=O)O	0.17
1307	CN(C)C1=CC2=C(C=C1)N=C3C=CC(=[N+](C)C)C=C3S2.[Cl-]	0.38
1309	CCOC(=O)N[C@@H]1CC[C@@H]2[C@@H](C1)C[C@@H]3[C@H]([C@H]2/C=C/C4=NC=C(C=C4)C5=CC(=CC=C5)F)[C@H](OC3=O)C	0.01
1310	CC(C)C1=CC(=CC=C1)O	0.14
1311	C1CNC[C@H]([C@@H]1C2=CC=C(C=C2)F)COC3=CC4=C(C=C3)OCO4	0.06
1312	CC(C)NC1=NC(=NC(=N1)N)Cl	0.486
1313	CCC1=CC(=CC=C1)O	0.255
1314	CN1CCC2=CC(=C3C=C2[C@@H]1CC4=CC=C(C=C4)OC5=C(C=CC(=C5)C[C@H]6C7=C(CCN6C)C(=C(C(=C7O3)OC)OC)Br)OC)OC	0.22
1315	CCOC1=CC=C(C=C1)NC(=O)C	0.6
1316	CS(=O)(=O)C1=C(C=C(C=C1)[C@@H](C[C@H]2CCC(=O)C2)C(=O)NC3=NC=CN=C3)Cl	0.48
1317	C[C@H](CS)C(=O)N1CCC[C@H]1C(=O)O	0.73
1318	CCCCCCOC(=O)C1=CC=CC=C1O	0
1319	CC1=C(C(=C(C=C1/C(=C/2\C=C(C(=O)C(=C2C)Br)Br)/C3=CC=CC=C3S(=O)(=O)[O-])Br)O)Br.[Na+]	0.00511
1320	C1=C(C=C(C=C1Cl)Cl)N	0.0522
1321	COP(=O)(OC)OC=C(Cl)Cl	1.18e-07
1322	CCN1CCN(C(=O)C1=O)C(=O)N[C@H](C2=CC=C(C=C2)O)C(=O)N[C@H]3[C@@H]4N(C3=O)C(=C(CS4)CSC5=NN=NN5C)C(=O)O	0.07
1323	CCN(CC1=C(C=CC=C1Cl)F)C2=C(C=C(C=C2[N+](=O)[O-])C(F)(F)F)[N+](=O)[O-]	0
1324	CC(C)(C)[C@@H](C(=O)N1C[C@@H](C[C@H]1C(=O)N[C@@]2(C[C@H]2C=C)C(=O)NS(=O)(=O)C3CC3)OC4=NC=C(C5=C4C=C(C=C5)Cl)OC)NC(=O)OC(C)(C)C	0.012
1325	CCCCCC(=O)O[C@@]1(CC[C@@H]2[C@@]1(CC[C@H]3[C@H]2CCC4=CC(=O)CC[C@]34C)C)C(=O)C	0.0175
1326	C[C@]12CCC(=O)C=C1CC[C@@H]3[C@@H]2CC[C@]4([C@H]3CCC4=O)C	0.1744
1327	CNC(=O)OC1=CC=CC2=CC=CC=C21	0.6922
1328	C1C2=C(C=C(C=C2)O)C3=CC=CC=C31	0.02488
1329	CCCCCCCCCC[N+](C)(C)CC1=CC=CC=C1.[Cl-]	0.0104
1330	C1=CC=C2C=C(C=CC2=C1)OC(=O)C3=CC=CC=C3N	0.00653
1331	CC1([C@@H](N2[C@H](S1)[C@@H](C2=O)NC(=O)[C@@H](C3=CC=CC=C3)NC(=O)C4=CNC5=C(C4=O)N=CC=C5)C(=O)O)C	0.1
1332	CC(=O)OCC1=C(N2[C@@H]([C@@H](C2=O)NC(=O)/C(=N\OC)/C3=CSC(=N3)N)SC1)C(=O)O	0.6
1333	COC1=C(C=C2C(=C1)C(=NC(=N2)N3CCN(CC3)C(=O)C4CCCO4)N)OC	0.08
1334	CC1(C(=O)N(C(=O)N1)C2=CC(=C(C=C2)[N+](=O)[O-])C(F)(F)F)C	0.167
1335	CC(C)NCC(COC1=CC=C(C=C1)CCOCC2CC2)O	0.4
1336	CC1=C(C(C(=C(N1)C)C(=O)OCC(C)C)C2=CC=CC=C2[N+](=O)[O-])C(=O)OC	0.003
1337	CCOC(=O)C(C)(C)OC1=CC=C(C=C1)Cl	7.42e-08
1338	CCOC(C)(C)C	0.7626
1339	C1C[N+]2=CC=CC=C2C3=CC=CC=[N+]31.O.[Br-].[Br-]	0.967
1340	CN(CCCC(=O)C1=CN=CC=C1)N=O	0.9647
1341	C1=CC=C(C(=C1)CC(=O)O)NC2=C(C=C(C=C2Cl)O)Cl	0.017
1342	CCO	0.9338
1343	C[C@H]([C@@H]1[C@H]2CC(=C(N2C1=O)C(=O)O)SCCN=CN)O	0.86
1344	C[N+]1(CCC2=CC(=C(C=C2C1CC3=CC(=C(C=C3)OC)OC)OC)OC)CCC(=O)OCCCCCOC(=O)CC[N+]4(CCC5=CC(=C(C=C5C4CC6=CC(=C(C=C6)OC)OC)OC)OC)C	0.52
1345	C1COCCN1CCOCCN2CCOCC2	1
1346	CN(C)CCCOC1=NN(C2=CC=CC=C21)CC3=CC=CC=C3	0.8
1347	CC(C)NCC(COC1=CC=CC=C1OCC=C)O	0.19
1348	CC(C)COCC(CN(CC1=CC=CC=C1)C2=CC=CC=C2)N3CCCC3	0.001
1349	CCCCNC(=O)NS(=O)(=O)C1=CC=C(C=C1)C	0.04
1350	CC(=O)N[C@H]1CCC2=CC(=C(C(=C2C3=CC=C(C(=O)C=C13)OC)OC)OC)OC	0.61
1351	CN1C(=NN=N1)SCC2=C(N3[C@@H]([C@@](C3=O)(NC(=O)C(C4=CC=C(C=C4)O)C(=O)O)OC)OC2)C(=O)O	0.39
1352	CCN1C=NC(=C1C(=O)NC)C(=O)NC	0.92
1353	CC1=C(N2[C@@H]([C@@H](C2=O)NC(=O)/C(=N\OC)/C3=CSC(=N3)N)SC1)C(=O)O	0.78
1354	CN1C(=NN=N1)SCC2=C(N3[C@@H]([C@@H](C3=O)NC(=O)/C(=N\OC)/C4=CSC(=N4)N)SC2)C(=O)O	0.31
1355	C1=CC(=CN=C1)C(=O)NCCO[N+](=O)[O-]	0.76
1356	CCOC1=CC2=CC=CC=C2OC1=O	0.22
1357	C1=CC(=C2C(=C1NCCNCCO)C(=O)C3=C(C=CC(=C3C2=O)O)O)NCCNCCO	0.25
1358	CC(=O)N1CCN(CC1)C2=CC=C(C=C2)OC[C@H]3CO[C@](O3)(CN4C=CN=C4)C5=C(C=C(C=C5)Cl)Cl	0.062
1359	CC[C@]12CC[C@H]3[C@H]([C@@H]1CC[C@]2(C#C)O)CCC4=CC(=O)CC[C@H]34	0.0392
1360	C1=CC(=C(C=C1O)O)C2=C(C(=O)C3=C(C=C(C=C3O2)O)O)O.O	5.73e-08
1361	CN1C[C@@H]2[C@@H](C1)C3=C(C=CC(=C3)Cl)OC4=CC=CC=C24	0.05
1362	CN1CCN(CC1)CC(=O)N(C)C2=CC=C(C=C2)N=C(C3=CC=CC=C3)C4=C(NC5=C4C=CC(=C5)C(=O)OC)O	0.02
1363	CN(C)C(=N)N=C(N)N	1
1364	C[C@]12CCC3=C4CCC(=O)C=C4CC[C@H]3[C@@H]1CC[C@]2(CC#N)O	0.1
1365	CC1=C(C(C(=C(N1)C)C(=O)OC(C)C)C2=CC(=CC=C2)[N+](=O)[O-])C(=O)OCCOC	0.016
1366	CC(=O)N(CC(CO)O)C1=C(C(=C(C(=C1I)C(=O)NCC(CO)O)I)C(=O)NCC(CO)O)I	1
1367	CC1([C@@H](N2[C@H](S1)[C@@](C2=O)(NC(=O)C(C3=CSC=C3)C(=O)O)OC)C(=O)O)C	0.21
1368	C1CC1NC2=NC(=NC(=N2)N)N	0.9352
1369	CC(C)[C@@H](C1=CC=C(C=C1)Cl)C(=O)O[C@H](C#N)C2=CC(=CC=C2)OC3=CC=CC=C3	3.58e-08
1370	CC(C)OC1=CC=CC(=C1)NC(=O)C2=CC=CC=C2C(F)(F)F	0.01882
1371	CN/C(=C\[N+](=O)[O-])/NCCSCC1=CC=C(O1)CN(C)C	0.95
1372	C(CC(O)(P(=O)(O)O)P(=O)(O)O)CN	0.22
1373	CCOC(=O)C(C)OC1=CC=C(C=C1)OC2=NC3=C(O2)C=C(C=C3)Cl	0
1374	CC(=O)C[C@H](C1=CC=C(C=C1)[N+](=O)[O-])C2=C(C3=CC=CC=C3OC2=O)O	0.012
1375	CC(=O)C[C@@H](C1=CC=C(C=C1)[N+](=O)[O-])C2=C(C3=CC=CC=C3OC2=O)O	0.009
1376	CC(C)NCC(COC1=CC=C(C=C1)COCCOC(C)C)O	0.66
1377	CC(C)NCC(COC1=CC=C(C=C1)NC(=O)C)O	0.93
1378	CN1CCCCC1CCC2=CC=CC=C2NC(=O)C3=CC=C(C=C3)OC	0.26
1379	CC1=C(C(=NO1)C2=CC=CC=C2)C(=O)N[C@H]3[C@@H]4N(C3=O)[C@H](C(S4)(C)C)C(=O)O	0.07
1380	C[C@H]1C[C@@H](C(=O)[C@@H](C1)[C@@H](CC2CC(=O)NC(=O)C2)O)C	0.629
1381	C1C(=O)NC(=O)N1/N=C/C2=CC=C(O2)[N+](=O)[O-]	0.415
1382	C1CNCC(C2=CC(=C(C(=C21)Cl)O)O)C3=CC=C(C=C3)O	0.12
1383	CNC1(CCCCC1=O)C2=CC=CC=C2Cl	0.88
1384	CC1(CN=C(NC1)NN=C(/C=C/C2=CC=C(C=C2)C(F)(F)F)/C=C/C3=CC=C(C=C3)C(F)(F)F)C	1.37e-08
1385	CO	0.9449
1386	CC(C)[C@H](C1=CC=C(C=C1)Cl)C(=O)O[C@@H](C#N)C2=CC(=CC=C2)OC3=CC=CC=C3	0
1387	CC(C)O	0.9214
1389	CCCN(CCOC1=C(C=C(C=C1Cl)Cl)Cl)C(=O)N2C=CN=C2	0.02237
1390	C[C@]12CCCC([C@@H]1CC[C@@]3([C@@H]2CCO3)C)(C)C	0.01541
1391	C1=CC=C(C=C1)NC(=O)NC2=CC(=NC=C2)Cl	0.02755
1392	C[C@]12CC[C@H]3[C@H]([C@@H]1CC[C@]2(C#C)O)CCC4=CC(=O)CC[C@H]34	0.0516
1393	C[C@@H]1CCC[C@@H](N1CCCC(C2=CC=CC=C2)(C3=CC=CC=N3)O)C	0.13
1394	C1=CN=C(N=C1)NS(=O)(=O)C2=CC=C(C=C2)N	0.44
1395	CC1(C(C1C(=O)OC(C#N)C2=CC(=C(C=C2)F)OC3=CC=CC=C3)C=C(Cl)Cl)C	1.82e-08
1396	CC1([C@@H](N2[C@H](S1(=O)=O)CC2=O)C(=O)O)C	0.62
1397	CC/C(=C(\C1=CC=C(C=C1)O)/C2=CC=C(C=C2)OCCN(C)C)/C3=CC=CC=C3	0.0153
1398	CC(=O)O[C@H]1C[C@@H]2CC[C@@H]3[C@@H]([C@]2(C[C@@H]1N4CC[N+](CC4)(C)C)C)CC[C@]5([C@H]3C[C@@H]([C@@H]5OC(=O)C)N6CC[N+](CC6)(C)C)C	0.98
1399	CO/N=C(/C1=CSC(=N1)N)\C(=O)N[C@H]2[C@@H]3N(C2=O)C(=CCS3)C(=O)O	0.72
1400	CC(C)C(C(C)(C)COC(=O)C(C)C)OC(=O)C(C)C	9.42e-07
1401	CCCOCC(=NC1=C(C=C(C=C1)Cl)C(F)(F)F)N2C=CN=C2	0.00839
1402	CC(C)(C(=O)O)O/N=C(/C1=NSC(=N1)N)\C(=O)N[C@H]2[C@@H]3N(C2=O)C(=C(CS3)C[N+]4=CC(=C(N4C)N)NC(=O)NCCN)C(=O)[O-]	0.81
1403	CC(=O)[C@]1(CC[C@@H]2[C@@]1(CC[C@H]3[C@H]2CCC4=CC(=O)CC[C@]34C)C)O	0.0828
1404	CCCC1=C2C(=CC3=C1OC(=CC3=O)C(=O)O)C(=O)C=C(N2CC)C(=O)O	0.11
1405	CN(C)CCCN1C2=CC=CC=C2SC3=C1C=C(C=C3)Cl.Cl	0.0235
1406	CCCCN=C(N)N=C(N)N	0.9
1407	C/C(=C\C(=O)NC)/OP(=O)(OC)OC	0.898
1408	C1CN(CCN1CCCN2C3=CC=CC=C3SC4=C2C=C(C=C4)C(F)(F)F)CCO	0.04
1409	CC(C)N1C(=NC(C)(C)C)SCN(C1=O)C2=CC=CC=C2	0.0003605
1410	C(C(=O)O)OC1=NC(=C(C(=C1Cl)N)Cl)F	0.09194
1411	CC1([C@@H](N2[C@H](S1)[C@@H](C2=O)NC(=O)[C@@H](C3=CC=CC=C3)N)C(=O)O)C	0.85
1412	C1C[C@@H](O[C@@H]1CO)N2C=NC3=C2N=CNC3=O	0.951
1413	CN1C(=NN=N1)SCC2=C(N3[C@@H]([C@@](C3=O)(NC(=O)C4SC(=C(C(=O)N)C(=O)O)S4)OC)SC2)C(=O)O	0.15
1414	CC1=C(SC(=N1)SCC2=C(N3[C@@H]([C@@H](C3=O)NC(=O)/C(=N\OC)/C4=CSC(=N4)N)SC2)C(=O)O)CC(=O)O	0.18
1415	C1=CN(C(=O)N=C1N)[C@H]2[C@H]([C@@H]([C@H](O2)CO)O)O.Cl	0.96
1416	CC(C(=O)OC)OC1=CC=C(C=C1)OC2=C(C=C(C=N2)C(F)(F)F)Cl	0.00819
1417	CCCCOC(=O)C(C)OC1=CC=C(C=C1)OC2=NC=C(C=C2)C(F)(F)F	0.00862
1418	C1=C(C(=C(C(=C1Cl)Cl)CC2=C(C(=CC(=C2Cl)Cl)Cl)O)O)Cl	8.62e-09
1419	CC(C)(C1=CC=CC=C1)C2=CC(=C(C(=C2)N3N=C4C=CC=CC4=N3)O)C(C)(C)C5=CC=CC=C5	5.21e-06
1420	CCN1C=C(C(=O)C2=CC(=C(C=C21)N3CCN(CC3)C)F)C(=O)O	0.75
1421	CCN1C=C(C(=O)C2=CC(=C(C=C21)N3CCNCC3)F)C(=O)O	0.13
1422	CCNC(=O)OC1CCN(CC1)C2=NN=CC3=CC(=C(C=C32)OC)OC	0.08
1423	CC1=CC(=O)C(=CN1)C(=O)N[C@H](C2=CC=C(C=C2)O)C(=O)N[C@H]3[C@@H]4N(C3=O)C(=C(CS4)CSC5=NN=NN5C)C(=O)O	0.03
1424	CCNCC(C1=CC(=CC=C1)O)O	0.77
1425	CCC(=O)NC1=CC(=C(C=C1)Cl)Cl	0.0713
1426	CC1=CN=C(S1)NC(=O)C2=C(C3=CC=CC=C3S(=O)(=O)N2C)O	0.003
1427	CCC(=O)N(C1=CC=CC=C1)C2(CCN(CC2)CCN3C(=O)N(N=N3)CC)COC	0.086
1428	CCOC(=O)[C@@H](C)OC1=CC=C(C=C1)OC2=NC3=C(O2)C=C(C=C3)Cl	0.00635
1429	C1COCCN1CCNC(=O)C2=CC=C(C=C2)Cl	0.77
1430	C1=CC=CC=C1	0.46
1431	CCC1=C[C@H]2C[C@@](C3=C(CN(C2)C1)C4=CC=CC=C4N3)(C5=C(C=C6C(=C5)[C@]78CCN9[C@H]7[C@@](C=CC9)([C@H]([C@@]([C@@H]8N6C)(C(=O)OC)O)OC(=O)C)CC)OC)C(=O)OC	0.87
1432	CC(Cl)(Cl)Cl	0.6658
1433	CCOC1=CC=CC=C1O[C@@H]([C@H]2CNCCO2)C3=CC=CC=C3	0.019
1434	C[C@@H]1[C@H]([C@H](C[C@@H](O1)O[C@@H]2[C@H](O[C@H](C[C@@H]2O)O[C@@H]3[C@H](O[C@H](C[C@@H]3O)O[C@H]4CC[C@]5([C@@H](C4)CC[C@@H]6[C@@H]5CC[C@]7([C@@]6(CC[C@@H]7C8=CC(=O)OC8)O)C)C)C)C)O)O	0.066
1435	CCCCCCCCCC[N+](C)(C)CCCCCCCCCC.[Cl-]	0
1436	CC[C@H](C)[C@H]1O[C@@]2(C[C@@H]3C[C@@H](C\C=C(C)\[C@@H](O[C@H]4C[C@H](OC)[C@@H](O[C@H]5C[C@H](OC)[C@@H](O)[C@H](C)O5)[C@H](C)O4)[C@@H](C)\C=C\C=C4/CO[C@@H]5[C@H](O)C(C)=C[C@@H](C(=O)O3)[C@]45O)O2)C=C[C@@H]1C	0.06687
1437	CCCNC(C)C(=O)NC1=CC=CC=C1C	0.72
1438	CS(=O)(=O)NC(=O)C1=C(C=CC(=C1)OC2=C(C=C(C=C2)C(F)(F)F)Cl)[N+](=O)[O-]	0.017
1439	C1[C@@H]2[C@@H]3[C@H]([C@H]1[C@H]4[C@@H]2O4)[C@@]5(C(=C([C@]3(C5(Cl)Cl)Cl)Cl)Cl)Cl	0.006423
1440	CC1=CC(=NO1)NS(=O)(=O)C2=CC=C(C=C2)N	0.23
1441	C1[C@@H]([C@H]([C@@H]([C@H](N1CCO)CO)O)O)O	1
1442	COC1=CC=C(C=C1)C(C2=CC=C(C=C2)OC)C(Cl)(Cl)Cl	0.0171
1443	CCOC(=O)NCCOC1=CC=C(C=C1)OC2=CC=CC=C2	0.00327
1444	CCOC(=O)C1=C(NC(=C(C1C2=C(C(=CC=C2)Cl)Cl)C(=O)OC)C)C	0.07
1445	C1=CC(=CC=C1C(C2=CC=C(C=C2)Cl)C(Cl)Cl)Cl	0.03115
1446	CC(C)(C(=O)O)O/N=C(/C1=CSC(=N1)N)\C(=O)N[C@H]2[C@@H]3N(C2=O)C(=C(CS3)C[N+]4=CC=CC=C4)C(=O)[O-]	0.79
1447	C1=CC(=CC=C1C(=C(Cl)Cl)C2=CC=C(C=C2)Cl)Cl	1.62e-06
1448	C[C@H]1/C=C\C=C(/C(=O)NC2=C(C3=C(C4=C(C(=C3O)C)O[C@@](C4=O)(OC=C[C@@H]([C@H]([C@H]([C@@H]([C@@H]([C@@H]([C@H]1O)C)O)C)OC(=O)C)C)OC)C)C5=NC6(CCN(CC6)CC(C)C)N=C25)O)\C	0.29
1449	CNCCC=C1C2=CC=CC=C2CCC3=CC=CC=C31	0.12
1450	CN1C2=CC=CC=C2C(C3=C(S1(=O)=O)C=C(C=C3)Cl)NCCCCCCC(=O)O	0.05
1451	CC(C)NC1=NC(=NC(=N1)SC)NC(C)C	0
1452	COC1=CC=CC=C1OCCNCC(COC2=CC=CC3=C2C4=CC=CC=C4N3)O	0.02
1453	CCOC1=CC(=CC(=C1N2C=CC=C2)OCC)CC3=CN=C(N=C3N)N	0.12
1454	COP(=S)(OC)SCN1C(=O)C2=CC=CC=C2C1=O	0.0477
1455	C[N+]1(CC[C@]23[C@@H]4C(=O)CC[C@]2([C@H]1CC5=C3C(=C(C=C5)O)O4)O)CC6CC6.[Br-]	0.87
1456	CC(=O)NCCC1=CNC2=C1C=C(C=C2)OC	0.498
1457	CN(CC(CO)O)C(=O)C1=C(C(=C(C(=C1I)C(=O)NCC(CO)O)I)NC(=O)COC)I	0.99
1458	CN1C(=NC(=O)C(=O)N1)SCC2=C(N3[C@@H]([C@@H](C3=O)NC(=O)/C(=N\OC)/C4=CSC(=N4)N)SC2)C(=O)O	0.1
1459	COC1=C(C=CC(=C1)S(=O)C)C2=NC3=C(N2)C=CC=N3	0.41
1460	CC1=CN=C(C(=C1OC)C)CS(=O)C2=NC3=C(N2)C=C(C=C3)OC	0.16
1461	CCCCCCCCN(C)C	0.5627
1462	COC1=CC(=CC(=C1OC)OC)CC2=CN=C(N=C2N)N	0.5
1463	CC(CN1C2=CC=CC=C2CCC3=CC=CC=C31)CN(C)C	0.051
1464	CCN1C=C(C(=O)C2=CC(=C(N=C21)N3CCNCC3)F)C(=O)O	0.8
1465	C1CN(CCC1C(=O)C2=CC=C(C=C2)F)CCN3C(=O)C4=CC=CC=C4NC3=O	0.055
1466	CCC/C(=N\OCC)/C1=C(CC(CC1=O)CC(C)SCC)O	0.05472
1467	C1CN2C(=CC=C2C(=O)C3=CC=CC=C3)C1C(=O)O	0.0068
1468	C1=CC=C(C(=C1)C2=NN=C(N=N2)C3=CC=CC=C3Cl)Cl	0
1469	CC1CC(=O)NN=C1C2=CC3=C(C=C2)N=C(N3)C4=CC=C(C=C4)OC	0.024
1470	CC(C)OP(=S)(OC(C)C)SCCNS(=O)(=O)C1=CC=CC=C1	0.006078
1471	COC1=C(C=C2C(=C1)C(=NC(=N2)N3CCN(CC3)C(=O)C4COC5=CC=CC=C5O4)N)OC	0.017
1472	CC1=NC(=NC(=N1)OC)NC(=O)NS(=O)(=O)C2=CC=CC=C2C(=O)OC	0.08599
1473	C1CC(CCC1OP(=O)([O-])OCC(CN(CCN(CC(=O)[O-])CC(=O)[O-])CC(=O)[O-])N(CC(=O)[O-])CC(=O)[O-])(C2=CC=CC=C2)C3=CC=CC=C3.[Gd+3]	0.16
1474	CC[C@@H](CO)NCCN[C@@H](CC)CO	0.18
1475	CC1=C(C(=CC=C1)C)NC(=O)NCCCNC(C)C	0.86
1476	C1C[C@@H](O[C@@H]1CO)N2C=CC(=NC2=O)N	0.96
1477	C[C@@H]1CCN([C@H](C1)C(=O)O)C(=O)[C@H](CCCN=C(N)N)NS(=O)(=O)C2=CC=CC3=C2NCC(C3)C	0.46
1478	C=CCl	0.5924
1480	C[C@H]1[C@@H]2CC[C@]3([C@H]([C@]2(CC[C@H]1O)C)[C@@H](C[C@@H]\4[C@@]3(C[C@@H](/C4=C(/CCC=C(C)C)\C(=O)[O-])OC(=O)C)C)O)C.[Na+]	0.02
1481	C[C@@]1([C@H]2C[C@H]3[C@@H](C(=O)C(=C([C@]3(C(=O)C2=C(C4=C1C=CC=C4O)O)O)O)C(=O)NCN5CCCC5)N(C)C)O	0.5
1482	CC[C@H](C)C(=O)O[C@H]1C[C@H](C=C2[C@H]1[C@H]([C@H](C=C2)C)CC[C@H](C[C@H](CC(=O)O)O)O)C	0.043
1483	CC[C@H](C)C(=O)O[C@H]1C[C@H](C=C2[C@H]1[C@H]([C@H](C=C2)C)CC[C@@H]3C[C@H](CC(=O)O3)O)C	0.01429
1484	C=C(Cl)Cl	0.428
1485	CC1=NC(=C(C(=N1)Cl)NC2=NCCN2)OC	0.93
1486	C(C(C(C(C(F)(F)S(=O)(=O)N)(F)F)(F)F)(F)F)(C(C(C(F)(F)F)(F)F)(F)F)(F)F	0.001515
1487	CC1=C(C(C(=C(N1)C#N)C(=O)OC)C2=CC(=CC=C2)[N+](=O)[O-])C(=O)OC(C)C	0.013
1488	C[As](=O)(C)O	0.9058
1490	CC1=C(C(C(=C(N1)C)C(=O)OC(C)C)C2=CC=CC3=NON=C32)C(=O)OC	0.04
1492	CCCN(CCC)C(=O)SCC	0
1494	C[C@]12C[C@@H]([C@]3([C@H]([C@@H]1C[C@@H]4[C@]2(OC(O4)(C)C)C(=O)CO)CCC5=CC(=O)C=C[C@@]53C)F)O	0.2
1495	C[C@@H](C(=O)N1CCC[C@H]1C(=O)O)N[C@@H](CCC2=CC=CC=C2)C(=O)O	0.62
1496	CN1CC[C@]23[C@@H]4C(=O)CC[C@]2([C@H]1CC5=C3C(=C(C=C5)OC)O4)O	0.55
1497	C1=CC(C2C1C3(C(=C(C2(C3(Cl)Cl)Cl)Cl)Cl)Cl)Cl	0.04333
1498	CNC[C@@H](CC12CCC(C3=CC=CC=C31)C4=CC=CC=C24)O	0.19
1499	C1C[C@H](N(C1)C(=O)[C@H](CCCCN)N[C@@H](CCC2=CC=CC=C2)C(=O)O)C(=O)O	1
1500	CN1CC[C@]23[C@@H]4[C@H]1CC5=C2C(=C(C=C5)OC)O[C@H]3[C@H](C=C4)O	1
1501	CC1=C(C(=C(C=C1C2(C3=CC=CC=C3S(=O)(=O)O2)C4=CC(=C(C(=C4C)Br)O)Br)Br)O)Br	0.00183
1502	CC(C)(C)[C@H]([C@@H](CC1=CC=C(C=C1)Cl)N2C=NC=N2)O	0.1538
1503	CCCC(C)C1(C(=O)NC(=O)NC1=O)CC	0.39
1504	CCCC(C)C1(C(=O)NC(=S)NC1=O)CC	0.14
1505	C1=C(N=C(S1)N=C(N)N)CSCC/C(=N/S(=O)(=O)N)/N	0.84
1506	CC(C)NCC(C1=CC(=C(C=C1)O)O)O	0.71
1507	C1=CC=C(C=C1)[Sn](C2=CC=CC=C2)C3=CC=CC=C3.O	0
1508	C1C2CC3CC1CC(C2)(C3)N	0.33
1509	CC(C)C[C@@H](C(=O)N[C@@H](CCCN=C(N)N)C(=O)N1CCC[C@H]1C(=O)NCC(=O)N)NC(=O)[C@@H](CC2=CC3=CC=CC=C3C=C2)NC(=O)[C@H](CC4=CC=C(C=C4)O)NC(=O)[C@H](CO)NC(=O)[C@H](CC5=CNC6=CC=CC=C65)NC(=O)[C@H](CC7=CN=CN7)NC(=O)[C@@H]8CCC(=O)N8	0.19
1510	CN1C(=NC(=N1)CO)NCCCOC2=CC=CC(=C2)CN3CCCCC3	0.96
1511	CC(=CC1C(C1(C)C)C(=O)OCN2C(=O)C3=C(C2=O)CCCC3)C	0
1512	CN/C(=C\[N+](=O)[O-])/NCCSCC1=CSC(=N1)CN(C)C	0.65
1513	CC(C)(C)C1=CC=C(C=C1)N	0.155
1514	CCC(=O)C(CC(C)N(C)C)(C1=CC=CC=C1)C2=CC=CC=C2	0.21
1515	C[C@@]12[C@H](C=C[C@@]3([C@@H]1[C@@H]([C@]45[C@H]3CC[C@](C4)(C(=C)C5)O)C(=O)O)OC2=O)O	0.24
1516	CCOC1=CC=C(C=C1)CC(CN(CCN(CC(=O)[O-])CC(=O)[O-])CC(=O)[O-])N(CC(=O)[O-])CC(=O)[O-].[Gd+3]	0.9
1517	C1CN(CCN(CCN(CCN1CC(=O)[O-])CC(=O)[O-])[C@H](CO)[C@@H](CO)O)CC(=O)[O-].[Gd+3]	1
1518	CN1CC[C@]23CCCC[C@H]2[C@H]1CC4=C3C=C(C=C4)O	0.6
1519	C1=CC=C2C(=C1)C(=O)OC2(C3=CC=C(C=C3)O)C4=CC=C(C=C4)O	0.03116
1520	C1CCC(CC1)(C2=CC=CC=C2)N3CCCCC3	0.35
1521	CCCCC1(C(=O)NC(=O)NC1=O)CC	0.6
1522	CC(=O)NCCCS(=O)(=O)O	1
1523	C1=CC=C2C(=C1)C(=O)NC2(C3=CC(=C(C=C3)Cl)S(=O)(=O)N)O	0.24
1524	CCC(C)(C1=CC=C(C=C1)O)C2=CC=C(C=C2)O	0.01823
1525	C1(=C(C(C(=C1Cl)Cl)(Cl)Cl)Cl)Cl	4.52e-07
1526	CCOC(=O)C(C)OC(=O)C1=C(C=CC(=C1)OC2=C(C=C(C=C2)C(F)(F)F)Cl)[N+](=O)[O-]	0
1527	CC1=C(NC(=O)N1)C(=O)C2=CC=C(C=C2)SC	0.3
1528	CN(CCCN1CC2=CC(=C(C=C2C1=O)OC)OC)CCC3=CC(=C(C=C3)OC)OC	0.12
1529	C/C(=C\C(=O)OC)/OP(=O)(OC)OC	0.674
1530	CCCCOC(=O)CC(CC(=O)OCCCC)(C(=O)OCCCC)OC(=O)C	0.00942
1531	C[C@H]1[C@@H](C(=O)N1S(=O)(=O)O)NC(=O)/C(=N\OC(C)(C)C(=O)O)/C2=CSC(=N2)N	0.4
1532	C1=CC(=CC=C1/C=C/C(=C\2/C(=C(C(=O)C(C2=O)([C@H]3[C@@H]([C@H]([C@@H]([C@H](O3)CO)O)O)O)O)[C@H]4[C@@H]([C@H]([C@@H]([C@H](O4)CO)O)O)O)O)/O)O	0.22
1533	CC1=C(C=C(C(=O)N1)C#N)C2=CC=NC=C2	0.035
1534	C1[C@@H]([C@H](C(=O)O1)CC2=CC(=CC=C2)O)CC3=CC(=CC=C3)O	0.0121
1535	CCCCSP(=O)(SCCCC)SCCCC	0.06651
1536	C[C@H]1[C@@H](SC(=O)N1C(=O)NC2CCCCC2)C3=CC=C(C=C3)Cl	0
1537	CN(C1=C(C(=C(C(=C1I)C(=O)NCC(CO)O)I)C(=O)NCC(CO)O)I)C(=O)CO	1
1538	CCOC(=O)C1=C2CN(C(=O)C3=C(N2C=N1)C=CC(=C3)F)C	0.58
1539	CC(CCl)Cl	0.5441
1540	C1=CC=C(C(=C1)C(C2=CC=C(C=C2)Cl)C(Cl)(Cl)Cl)Cl	1.59e-08
1541	CC#CCC(C)[C@@H](/C=C/[C@H]1[C@@H](C[C@H]2[C@@H]1C/C(=C/CCCC(=O)O)/C2)O)O	0.4
1542	CCC(=O)C	0.8744
1543	C(=C(Cl)Cl)Cl	0.295
1544	C1=CC=C(C=C1)P(=O)(C2=CC=CC=C2)C3=CC=CC=C3	0.101
1545	CCCCOC(=O)[C@@H](C)OC1=CC=C(C=C1)OC2=NC=C(C=C2)C(F)(F)F	0
1546	C=CC1=C(N2[C@@H]([C@@H](C2=O)NC(=O)/C(=N\OCC(=O)O)/C3=CSC(=N3)N)SC1)C(=O)O	0.31
1547	C[C@@H]1CN(CC[C@@]1(C2=CC=CC=C2)C(=O)O)C3CCC(CC3)(C#N)C4=CC=C(C=C4)F	0.453
1548	CC1=C(C(=C(C(=C1F)F)COC(=O)[C@H]2[C@H](C2(C)C)/C=C(/C(F)(F)F)\Cl)F)F	0
1549	C[C@@]1([C@H]2[C@@H]([C@H]3[C@@H](C(=O)C(=C([C@]3(C(=O)C2=C(C4=C1C=CC=C4O)O)O)O)C(=O)N)N(C)C)O)O	0.9
1550	CN[C@H]1CC[C@H](C2=CC=CC=C12)C3=CC(=C(C=C3)Cl)Cl	0.01
1551	C1=C(C=NC(=C1Cl)NC2=C(C=C(C(=C2[N+](=O)[O-])Cl)C(F)(F)F)[N+](=O)[O-])C(F)(F)F	0.004357
1552	CN1CCN(CC1)C2=C(C=C3C(=C2F)N(C=C(C3=O)C(=O)O)CCF)F	0.73
1553	CCC(C)(C)C1=CC(=C(C=C1O)C(C)(C)CC)O	0.0166
1554	CC[C@]12CC[C@H]3[C@H]([C@@H]1CC[C@]2(C#C)O)CCC4=CC(=O)CC[C@H]34	0.0369
1555	CN(C1=C(C(=C(C(=C1I)C(=O)NC(CO)C(CO)O)I)C(=O)NC(CO)C(CO)O)I)C(=O)CC(=O)N(C)C2=C(C(=C(C(=C2I)C(=O)NC(CO)C(CO)O)I)C(=O)NC(CO)C(CO)O)I	1
1556	CCOC(=O)N1CCC(=C2C3=C(CCC4=C2N=CC=C4)C=C(C=C3)Cl)CC1	0.00968
1557	CCC(C)(C)C(=O)O[C@H]1C[C@H](C=C2[C@H]1[C@H]([C@H](C=C2)C)CC[C@@H]3C[C@H](CC(=O)O3)O)C	0.00398
1558	CC(C)(C1=CC(=C(C(=C1)Br)O)Br)C2=CC(=C(C(=C2)Br)O)Br	0.00107
1559	CC(C)(C1=CC(=C(C(=C1)Cl)O)Cl)C2=CC(=C(C(=C2)Cl)O)Cl	0.00598
1560	CCCCC(CN1C=NC=N1)(C2=C(C=C(C=C2)Cl)Cl)O	0.041
1561	CC(C)(C1=CC=C(C=C1)O)C2=CC=C(C=C2)O	0.0385
1562	C1=CC(=CC=C1N)S(=O)(=O)C2=CC=C(C=C2)N	0.295
1563	C1=CC(=CC=C1O)S(=O)(=O)C2=CC=C(C=C2)O	0.0576
1564	CCN1CCC[C@H]1CNC(=O)C2=C(C=CC(=C2OC)Br)OC	0.16
1565	C[C@@H]1C/C=C/C=C/[C@@H]([C@@H](C[C@@H]([C@@H]([C@H]([C@@H](CC(=O)O1)O)OC)OC2C(C(C(C(O2)C)OC3CC(C(C(O3)C)O)(C)O)N(C)C)O)CC=O)C)OC4CCC(C(O4)C)N(C)C	0.26
1566	CC1=C(N=C(N1C2=CC=C(C=C2)F)C)C#CC3=CC(=NC=C3)Cl	0.01
1567	CCC(C)(C)C1=CC=C(C=C1)O	0
1568	CCC(=O)O[C@@]1([C@@H](C[C@@H]2[C@@]1(C[C@@H]([C@]3([C@H]2C[C@@H](C4=CC(=O)C=C[C@@]43C)F)F)O)C)C)C(=O)SCF	0.1
1569	C(CN(CC(=O)O)CC(=O)[O-])N(CCN(CC(=O)O)CC(=O)[O-])CC(=O)[O-].[Gd+3]	1
1570	CCCC(=O)N1CCCN(CC1)C2=NC3=CC(=C(C=C3C(=N2)N)OC)OC	0.06
1571	CC1=C2C(=CC=C1)C(=C3C=CC=C(C3=N2)C(=O)NC)NC4=C(C=C(C=C4)NS(=O)(=O)C)OC	0.0011
1572	C1=CC=C2C(=C1)C(=O)NS2(=O)=O	0.2258
1573	CC[C@H](C)C(=O)O[C@H]1C[C@@H](C=C2[C@H]1[C@H]([C@H](C=C2)C)CC[C@H](C[C@H](CC(=O)O)O)O)O	0.5
1574	CO[C@H]1CN(CC[C@H]1NC(=O)C2=CC(=C(C=C2OC)N)Cl)CCCOC3=CC=C(C=C3)F	0.02
1575	CC[C@@H]1[C@@]([C@@H]([C@H](C(=O)[C@@H](C[C@@]([C@@H]([C@H]([C@@H]([C@H](C(=O)O1)C)O[C@H]2C[C@@]([C@H]([C@@H](O2)C)O)(C)OC)C)O[C@H]3[C@@H]([C@H](C[C@H](O3)C)N(C)C)O)(C)OC)C)C)O)(C)O	0.23
1576	CC[C@H](C)C(=O)O[C@H]1C[C@@H](C=C2[C@H]1[C@H]([C@H](C=C2)C)CC[C@H](C[C@H](CC(=O)[O-])O)O)O.[Na+]	0.361
1577	CC(C)NCC(COC1=CC=C(C=C1)CCC(=O)OC)O	0.59
1579	CC(C)C1(C(=O)NC(=N1)C2=C(C=CC=N2)C(=O)O)C	0.9231
1580	CC(C)C1(C(=O)NC(=N1)C2=NC3=CC=CC=C3C=C2C(=O)O)C	0.1513
1581	CCC1=CC(=C(N=C1)C2=NC(C(=O)N2)(C)C(C)C)C(=O)O	0.2895
1582	CN(CCCNC(=O)C1CCCO1)C2=NC3=CC(=C(C=C3C(=N2)N)OC)OC	0.14
1583	CCCCCCC(C)OC(=O)COC1=NC(=C(C(=C1Cl)N)Cl)F	0
1584	CCC(C)(C)NCC(COC1=CC=CC=C1C(=O)CCC2=CC=CC=C2)O	0.017
1585	CC1(CON(C1=O)CC2=CC=CC=C2Cl)C	0.1734
1586	C1COCCN1C(=O)NCCNCC(COC2=CC=C(C=C2)O)O	0.97
1587	CC(=O)CC(C1=CC=CC=C1)C2=C(C3=CC=CC=C3OC2=O)O	0.01327
1588	CCCCC[C@@H](CC[C@H]1[C@@H](C[C@H]2[C@@H]1CC3=C(C2)C(=CC=C3)OCC(=O)O)O)O	0.09
1589	C1=CC=C(C(=C1)C(C2=CC=C(C=C2)O)C3=CC=C(C=C3)O)C(=O)O	0.00918
1590	CC1(C[C@@H]1C(=O)N/C(=C\CCCCSC[C@@H](C(=O)O)N)/C(=O)O)C	0.6
1591	CC1=NC(=NC(=N1)OC)NC(=O)NS(=O)(=O)C2=CC=CC=C2OCCCl	0.02305
1592	CO/N=C(/C1=CSC(=N1)N)\C(=O)N[C@H]2[C@@H]3N(C2=O)C(=C(CS3)CSC4=CN=NS4)C(=O)O	0.12
1593	C1=CC=C2C(=C1)C(=O)[N-]S2(=O)=O.O.[Na+]	0.698
1594	C1=NC2=C(N1COC(CO)CO)N=C(NC2=O)N	0.99
1595	CC1COC2=C3N1C=C(C(=O)C3=CC(=C2N4CCN(CC4)C)F)C(=O)O	0.75
1596	C1=CC(=CC=C1[N+](=O)[O-])[O-].[Na+]	0.17
1597	CCC(C)(CC)C1=NOC(=C1)NC(=O)C2=C(C=CC=C2OC)OC	0.0718
1598	CC1=CC=C(C=C1)C2=C(N3C=C(C=CC3=N2)C)CC(=O)N(C)C	0.08
1599	C1CCN(CC1)CCOC2=CC=C(C=C2)C(=O)C3=C(SC4=C3C=CC(=C4)O)C5=CC=C(C=C5)O.Cl	0.0129
1600	CC1=C(C=CC=C1C2=CC=CC=C2)COC(=O)[C@@H]3[C@@H](C3(C)C)/C=C(/C(F)(F)F)\Cl	0
1601	C1(=C(C(=C(C(=C1Cl)Cl)Cl)Cl)Cl)[N+](=O)[O-]	0
1602	C[C@@H](C(=O)N1CC2=CC=CC=C2C[C@H]1C(=O)O)N[C@@H](CCC3=CC=CC=C3)C(=O)O	0.32
1603	CC1=CC=CC=C1O[C@H](CCNC)C2=CC=CC=C2	0.02
1604	COC1=CC(=NC(=N1)NC(=O)NS(=O)(=O)CC2=CC=CC=C2C(=O)OC)OC	0.00905
1605	C[C@H]([C@H]1C(=O)N[C@@H](CSSC[C@@H](C(=O)N[C@H](C(=O)N[C@@H](C(=O)N[C@H](C(=O)N1)CCCCN)CC2=CNC3=CC=CC=C32)CC4=CC=CC=C4)NC(=O)[C@@H](CC5=CC=CC=C5)N)C(=O)N[C@H](CO)[C@@H](C)O)O	0.35
1606	C1CC2=CC=CC3=C2C1=CC=C3	0.04533
1607	CCC1=NN(C(=O)N1CCOC2=CC=CC=C2)CCCN3CCN(CC3)C4=CC(=CC=C4)Cl	0.01
1608	CC1=C(C(=CC=C1)[N+](=O)[O-])C	3.21e-08
1609	CCNC1=NC(=NC(=N1)SC)NC(C)C	0.003952
1610	C[C@H]1C[C@H]2[C@@H]3CC[C@@]([C@]3(C[C@@H]([C@@H]2[C@@]4(C1=CC(=O)C=C4)C)O)C)(C(=O)CO)O	0.23
1611	CC(C)(C)C(/C(=C\C1=C(C=C(C=C1)Cl)Cl)/N2C=NC=N2)O	0.01947
1612	CN1C=NC2=C1C(=O)NC(=O)N2C	0.955
1613	CC(=C)[C@H]1CC2=C(O1)C=CC3=C2O[C@@H]4COC5=CC(=C(C=C5[C@@H]4C3=O)OC)OC	0.003404
1614	C1CN(CCN1CCOCC(=O)O)C(C2=CC=CC=C2)C3=CC=C(C=C3)Cl	0.01
1615	CC1=C(C=CC(=C1)CC2=CC(=C(C=C2)N)C)N	0.2257
1616	CCN(CC)CCCC(C)NC1=C2C=C(C=CC2=NC3=C1C=CC(=C3)Cl)OC	0.13
1617	CC[C@@H]1[C@@]([C@@H]([C@H](N(C[C@@H](C[C@@]([C@@H]([C@H]([C@@H]([C@H](C(=O)O1)C)O[C@H]2C[C@@]([C@H]([C@@H](O2)C)O)(C)OC)C)O[C@H]3[C@@H]([C@H](C[C@H](O3)C)N(C)C)O)(C)O)C)C)C)O)(C)O	0.88
1618	C[C@@H]1C[C@H]2[C@@H]3CCC4=CC(=O)C=C[C@@]4([C@]3([C@H](C[C@@]2([C@]1(C(=O)CCl)OC(=O)C5=CC=CO5)C)O)Cl)C	0.01
1619	CC1=CC=CC=C1C(C2=CC=CC=C2)OCCN(C)C	0.175
1620	CCCN1CCCC[C@H]1C(=O)NC2=C(C=CC=C2C)C	0.06
1621	C1=CC(=C(C2=NC=C(C=C21)Cl)C(=O)O)Cl	0.02799
1622	CC[C@H](C1=CC=C(C=C1)O)[C@@H](CC)C2=CC=C(C=C2)O	0.00772
1623	C1=CC=C(C=C1)N=NC2=C(C=CC3=CC=CC=C32)O	0.00277
1624	C[C@@H]1CN[C@H](C(=O)N([C@@H](C(=O)N[C@@H](C(=O)NCCCC2=CC=CC=C2O1)CC3=CC=C(C=C3)F)C)C)C4CC4	0.01
1625	CC1=C(C=C(C=C1)[C@H]2[C@@H]([C@H]([C@@H]([C@H](O2)CO)O)O)O)CC3=CC=C(S3)C4=CC=C(C=C4)F	0.01
1626	CCN1CCC[C@H]1CNC(=O)C2=C(C(=CC(=C2OC)Cl)Cl)O	0.06
1627	CC#C[C@@]1(CC[C@@H]2[C@@]1(C[C@@H](C3=C4CCC(=O)C=C4CC[C@@H]23)C5=CC=C(C=C5)N(C)C)C)O	0.0167
1628	C1CCN(CC1)CCOC2=CC=C(C=C2)C(=O)C3=C(SC4=C3C=CC(=C4)O)C5=CC=C(C=C5)O	0.05
1629	CCC(C)N1C(=O)N(C=N1)C2=CC=C(C=C2)N3CCN(CC3)C4=CC=C(C=C4)OC[C@H]5CO[C@](O5)(CN6C=NC=N6)C7=C(C=C(C=C7)Cl)Cl	0.002
1630	C1=CC=C(C(=C1)C2=NC(C(=O)NC3=C2C=C(C=C3)Cl)O)Cl	0.09
1631	CN1C2=C(C=C(C=C2)Cl)C(=NC(C1=O)O)C3=CC=CC=C3	0.017
1632	CCOC(=O)C1=CC=CC=C1C(=O)OCC	0.19
1633	C[C@]12CC[C@@]34C[C@@]35CC[C@@H](C([C@@H]5[C@H](C[C@H]4[C@@]1(C[C@@H]([C@@H]2[C@]6(CC[C@H](O6)C(C)(C)O)C)O)C)O[C@H]7[C@@H]([C@H]([C@@H]([C@H](O7)CO)O)O)O)(C)C)O[C@H]8[C@@H]([C@H]([C@@H](CO8)O)O)O	0.14
1634	CC(C)COC(=O)C1=CC=CC=C1C(=O)OCC(C)C	0.000435
1635	CCCCOC(=O)C1=CC=CC=C1C(=O)OCCCC	0.028
1636	CCCCCCOC(=O)C1=CC=CC=C1C(=O)OCCCCCC	2.71e-06
1637	C[C@H]([C@@H]1[C@@H]2N(C1=O)C(=C(S2)COC(=O)N)C(=O)[O-])O.[Na+]	0.72
1639	CN1C2=C(C=C(C=C2)Cl)C(=NC(C1=O)O)C3=CC=CC=C3Cl	0.12
1640	COC1CNCCC1NC(=O)C2=CC(=C(C=C2OC)N)Cl	0.63
1641	CO/N=C(/C1=CSC(=N1)N)\C(=O)N[C@H]2[C@@H]3N(C2=O)C(=C(CS3)C[N+]4=CC=CC5=C4CCC5)C(=O)[O-]	0.9
1642	C1=CC=C2C(=C1)C=CC3=CC=CC=C32	7.6e-06
1643	CC(C)(C)OC(=O)N[C@H]1CCCCC/C=C\[C@@H]2C[C@]2(NC(=O)[C@@H]3C[C@H](CN3C1=O)OC(=O)N4CC5=C(C4)C(=CC=C5)F)C(=O)NS(=O)(=O)C6CC6	0.02
1644	CC[C@]1(CN2CC[C@H]1C[C@@H]2[C@H](C3=C4C=C(C=CC4=NC=C3)OC)O)O	0.47
1645	C[Si](CN1C=NC=N1)(C2=CC=C(C=C2)F)C3=CC=C(C=C3)F	0.02893
1646	CCC(C)N(C)C(=O)C1=CC2=CC=CC=C2C(=N1)C3=CC=CC=C3Cl	0.01614
1647	CN1N=C(N=N1)C2=NC=C(C=C2)C3=C(C=C(C=C3)N4C[C@@H](OC4=O)CO)F	0.11
1648	CCCCOC(=O)C1=CC=CC=C1C(=O)OCC2=CC=CC=C2	3.22e-06
1649	C1CC1N2C=C(C(=O)C3=CC(=C(C=C32)N4CCNCC4)F)C(=O)O	0.7
1650	C1=CC=C(C=C1)N(C2=CC=CC=C2)N=O	0.04368
1651	COC1=C(C=CC(=C1)S(=O)C)C2=NC3=C(N2)C=NC=C3	0.48
1652	C1=CC(=C(C=C1F)F)C(CN2C=NC=N2)(CN3C=NC=N3)O	0.7109
1653	COP(=S)(OC)SCN1C(=O)C2=CC=CC=C2N=N1	0.2137
1654	CC[C@@]1(C[C@H]2C[C@@](C3=C(CCN(C2)C1)C4=CC=CC=C4N3)(C5=C(C=C6C(=C5)[C@]78CCN9[C@H]7[C@@](C=CC9)([C@H]([C@@]([C@@H]8N6C)(C(=O)OC)O)OC(=O)C)CC)OC)C(=O)OC)O	0.14
1655	C1=CC=C2C(=C1)C=NN=C2NN	0.12
1656	C1C2=CC=CC=C2C3=CC=CC=C31	0.01567
1657	CC(C)(CC1=CC=C(C=C1)OC)NC[C@@H](C2=C3C(=CC(=C2)O)NC(=O)CO3)O	0.4
1658	CC(C)C[C@@H](C(=O)[C@]1(CO1)C)NC(=O)[C@H](CC2=CC=CC=C2)NC(=O)[C@H](CC(C)C)NC(=O)[C@H](CCC3=CC=CC=C3)NC(=O)CN4CCOCC4	0.02
1659	C1C[N+]2(CCC1(CC2)C(C3=CC=CC=C3)(C4=CC=CC=C4)O)CCOCC5=CC=CC=C5	0.11
1660	CC1=C(C(=O)N2C=CSC2=N1)CCN3CCC(=C(C4=CC=C(C=C4)F)C5=CC=C(C=C5)F)CC3	0.008
1661	CC1([C@@H](N2[C@H](S1)[C@@H](C2=O)NC(=O)COC3=CC=CC=C3)C(=O)O)C	0.45
1662	CC1=C2C(=C(N(C1=O)C)NC3=C(C=C(C=C3)I)F)C(=O)N(C(=O)N2C4=CC=CC(=C4)NC(=O)C)C5CC5	0.03
1663	CN1CCCC1=O	0.888
1664	C1[C@H]([C@@H]2[C@H](O1)[C@H](CO2)O[N+](=O)[O-])O[N+](=O)[O-]	0.72
1665	C1=CC(=C(C(=C1)Cl)Cl)Cl	0.01567
1666	CC1=C(C(=CC=C1)C)N	0.4311
1667	C1=C(N=C(S1)N)/C(=N/OCC(=O)O)/C(=O)N[C@H]2[C@H](N(C2=O)S(=O)(=O)O)COC(=O)N	0.72
1668	CC1=CSC(=C1N(C(C)COC)C(=O)CCl)C	0.2318
1669	CCOC(=O)[C@H](CCC1=CC=CC=C1)N[C@@H](C)C(=O)N2[C@H]3CCCC[C@@H]3C[C@H]2C(=O)O	0.17
1670	C[C@H](C1=C(C=CC(=C1Cl)F)Cl)OC2=C(N=CC(=C2)C3=CN(N=C3)C4CCNCC4)N	0.09
1671	CC1=CC=CC=C1CO[C@@H]2C[C@]3(CC[C@@]2(O3)C)C(C)C	0
1672	CC/C(=N\OCC)/C1=C(CC(CC1=O)C2=C(C=C(C=C2C)C)C)O	0.169
1673	COC1=C2C(=CC(=C1N3CCC/C(=C(/CN)\F)/C3)F)C(=O)C(=CN2C4CC4)C(=O)O	0.34
1674	C1(=C(C(=C(C(=C1Cl)Cl)Cl)Cl)Cl)O	0.05441
1675	C1CC1C2=CC=C(C3=CC=CC=C23)N4C(=NN=C4Br)SCC(=O)O	0.02
1676	CS(=O)(=O)C1=CC(=C(C=C1)C(=O)NC2=CC(=C(C=C2)Cl)C3=CC=CC=N3)Cl	0.01
1677	C[N+]1(CCCC1)CC2=C(N3[C@@H]([C@@H](C3=O)NC(=O)/C(=N\OC)/C4=CSC(=N4)N)SC2)C(=O)[O-]	0.78
1678	C1=C(C=C(C(=C1Cl)O)Cl)Cl	0.01512
1679	C=CN1CCCC1=O	0.953
1680	CCOC(=O)C1=C(NC(=C(C1C2=CC=CC=C2Cl)C(=O)OC)C)COCCN	0.005
1681	CC(C)(C)C1=CC=CC=C1O	0.000115
1682	CCC1=CC(=C(C(=C1)C(C)(C)C)O)CC2=C(C(=CC(=C2)CC)C(C)(C)C)O	0.00513
1683	CC(C)(C)C1=CC(=CC(=C1O)C(C)(C)C)CN(C)C	0.2649
1684	C[C@@H]1CC[C@H]2[C@H]([C@@H](O[C@H]3[C@@]24[C@H]1CC[C@](O3)(OO4)C)OC(=O)CCC(=O)O)C	0.25
1685	CC(C)(C)C1=CC(=C(C=C1O)C(C)(C)C)O	1.83e-07
1686	CC1=CC(=C(C=C1)C(C)(C)C)O	0.0264
1687	CCCC[C@@H]1CC(=O)[C@]2([C@@H](O1)O[C@@H]3[C@H]([C@@H]([C@@H]([C@@H]([C@H]3O2)NC)O)NC)O)O	0.65
1688	CCCCC(CN1C=NC=N1)(C#N)C2=CC=C(C=C2)Cl	0.08429
1689	CCC(C)C1=C(C(=CC(=C1)[N+](=O)[O-])[N+](=O)[O-])O	0.00043
1690	CC1=NN(C(=O)C1)C2=CC=CC=C2	0.89
1691	CN(C)CCNC(=O)C1=CC=CC2=CC3=CC=CC=C3N=C21	0.03
1692	C1=CC(=C(C=C1N)C(=O)O)O	0.39
1693	C[C@@]1([C@@H](N2[C@H](S1(=O)=O)CC2=O)C(=O)O)CN3C=CN=N3	0.7
1694	CC(=O)N(CC(COC)O)C1=C(C(=C(C(=C1I)C(=O)NCC(CO)O)I)C(=O)NCC(CO)O)I	1
1695	C1=CC(=CC=C1SC(P(=O)(O)O)P(=O)(O)O)Cl	0.1
1696	COC1=CC=CC=C1N	0.4532
1697	COC1=CC=CC=C1O	0.569
1698	C1=CC=C2C(=C1)C=CC=C2O	0.0682
1699	C1=CC=C(C=C1)NC2=CC=CC3=CC=CC=C32	0.006962
1700	CCC1=CC=C(C=C1)CC2=CC3=C(CO[C@@]34[C@@H]([C@H]([C@@H]([C@H](O4)CO)O)O)O)C=C2	0.46
1701	CC(CS(=O)(=O)C1=CC=C(C=C1)F)(C(=O)NC2=CC(=C(C=C2)C#N)C(F)(F)F)O	0.0323
1702	C1=CC=C(C=C1)C2=CC=CC=C2O	0.04105
1703	CCOC(=O)C1=C(NC(=C(C1C2=C3C(=CC=C2)OCO3)C(=O)OC)C)C	1
1704	CC(C)(C1=CC=C(C=C1)C(=O)CCCN2CCC(CC2)OC(C3=CC=CC=C3)C4=CC=CC=C4)C(=O)O	0.05
1705	CC[N+](CC)(CC1=CC=CC=C1)CC(=O)NC2=C(C=CC=C2C)C.C1=CC=C2C(=C1)C(=O)N=S2(=O)[O-]	0.488
1706	CN(C)C1=CC=C(C=C1)C(=O)C2=CC=C(C=C2)N(C)C	0.00959
1707	CC(C)CCCCCCC(=O)N[C@@H]1[C@H]([C@@H]([C@H](O[C@H]1OC2=C3C=C4C=C2OC5=C(C=C(C=C5)[C@H]([C@H]6C(=O)N[C@@H](C7=C(C(=CC(=C7)O)O[C@@H]8[C@H]([C@H]([C@@H]([C@H](O8)CO)O)O)O)C9=C(C=CC(=C9)[C@H](C(=O)N6)NC(=O)[C@@H]4NC(=O)[C@@H]1C2=CC(=CC(=C2)OC2=C(C=CC(=C2)[C@@H](C(=O)N[C@H](CC2=CC(=C(O3)C=C2)Cl)C(=O)N1)N)O)O)O)C(=O)O)O[C@H]1[C@@H]([C@H]([C@@H]([C@H](O1)CO)O)O)NC(=O)C)Cl)CO)O)O	0.09
1708	CCCCC/C=C\CCC(=O)N[C@@H]1[C@H]([C@@H]([C@H](O[C@H]1OC2=C3C=C4C=C2OC5=C(C=C(C=C5)[C@H]([C@H]6C(=O)N[C@@H](C7=C(C(=CC(=C7)O)O[C@@H]8[C@H]([C@H]([C@@H]([C@H](O8)CO)O)O)O)C9=C(C=CC(=C9)[C@H](C(=O)N6)NC(=O)[C@@H]4NC(=O)[C@@H]1C2=CC(=CC(=C2)OC2=C(C=CC(=C2)[C@@H](C(=O)N[C@H](CC2=CC(=C(O3)C=C2)Cl)C(=O)N1)N)O)O)O)C(=O)O)O[C@H]1[C@@H]([C@H]([C@@H]([C@H](O1)CO)O)O)NC(=O)C)Cl)CO)O)O	0.14
1709	CCCCCCCCCC(=O)N[C@@H]1[C@H]([C@@H]([C@H](O[C@H]1OC2=C3C=C4C=C2OC5=C(C=C(C=C5)[C@H]([C@H]6C(=O)N[C@@H](C7=C(C(=CC(=C7)O)O[C@@H]8[C@H]([C@H]([C@@H]([C@H](O8)CO)O)O)O)C9=C(C=CC(=C9)[C@H](C(=O)N6)NC(=O)[C@@H]4NC(=O)[C@@H]1C2=CC(=CC(=C2)OC2=C(C=CC(=C2)[C@@H](C(=O)N[C@H](CC2=CC(=C(O3)C=C2)Cl)C(=O)N1)N)O)O)O)C(=O)O)O[C@H]1[C@@H]([C@H]([C@@H]([C@H](O1)CO)O)O)NC(=O)C)Cl)CO)O)O	0.06
1710	CCC(C)CCCCCCC(=O)NC1C(C(C(OC1OC2=C3C=C4C=C2OC5=C(C=C(C=C5)C(C6C(=O)NC(C7=C(C(=CC(=C7)O)OC8C(C(C(C(O8)CO)O)O)O)C9=C(C=CC(=C9)C(C(=O)N6)NC(=O)C4NC(=O)C1C2=CC(=CC(=C2)OC2=C(C=CC(=C2)C(C(=O)NC(CC2=CC(=C(O3)C=C2)Cl)C(=O)N1)N)O)O)O)C(=O)O)OC1C(C(C(C(O1)CO)O)O)NC(=O)C)Cl)CO)O)O	0.044
1711	CC(C)CCCCCCCC(=O)N[C@@H]1[C@H]([C@@H]([C@H](O[C@H]1OC2=C3C=C4C=C2OC5=C(C=C(C=C5)[C@H]([C@H]6C(=O)N[C@@H](C7=C(C(=CC(=C7)O)O[C@@H]8[C@H]([C@H]([C@@H]([C@H](O8)CO)O)O)O)C9=C(C=CC(=C9)[C@H](C(=O)N6)NC(=O)[C@@H]4NC(=O)[C@@H]1C2=CC(=CC(=C2)OC2=C(C=CC(=C2)[C@@H](C(=O)N[C@H](CC2=CC(=C(O3)C=C2)Cl)C(=O)N1)N)O)O)O)C(=O)O)O[C@H]1[C@@H]([C@H]([C@@H]([C@H](O1)CO)O)O)NC(=O)C)Cl)CO)O)O	0.033
1712	C1=CC=C2C=CC=CC2=C1	0.0156
1713	C1=CC=C2C(=C1)C=CC=N2	0.2036
1714	C1CN(CCN1CCCCOC2=CC3=C(C=C2)C=CC(=O)N3)C4=C5C=CSC5=CC=C4	0.002
1715	CCCN(CCC)CCC1=C2CC(=O)NC2=CC=C1	0.6
1716	CC[C@@]1(C2=C(COC1=O)C(=O)N3CC4=CC5=C(C=CC=C5N=C4C3=C2)N)O	0.003
1717	CC(C)(C)NC[C@@H](COC1=NSN=C1N2CCOCC2)O.CC(C)(C)NC[C@@H](COC1=NSN=C1N2CCOCC2)O.O	0.9
1718	CCOC1=CC2=C(C=C1)NC(C=C2C)(C)C	0.01069
1719	C1=CC=C2C=C(C=CC2=C1)N	0.1099
1720	CC1=CC2=C(C=C1)N=CC=C2	0.101
1721	C1=CC=C2C(=C1)C=CC(=O)O2	0.1922
1722	CCN(CC)C1=CC=CC=C1	0.04287
1723	C1=CC(=C(C(=C1)C(=O)C2=CC=C(C=C2)Br)N)CC(=O)O	0.0011
1724	C1=CC=C(C=C1)C2=NC(=NC(=N2)N)N	0.343
1725	C1=CC=C(C=C1)C2=CC(=C(C=C2)O)Cl	1.17e-08
1726	CC(=O)N(CC(CN(C1=C(C(=C(C(=C1I)C(=O)NCC(CO)O)I)C(=O)NCC(CO)O)I)C(=O)C)O)C2=C(C(=C(C(=C2I)C(=O)NCC(CO)O)I)C(=O)NCC(CO)O)I	1
1727	CCCCN(CCCC)N=O	0.2602
1728	C1=CC=C(C=C1)C2=CC=CC=C2	0.01557
1729	CCN(CC)C(=O)[C@@]1(C[C@@H]1CN)C2=CC=CC=C2	0.87
1730	C/C=C/C1=C(N2[C@@H]([C@@H](C2=O)NC(=O)[C@@H](C3=CC=C(C=C3)O)N)SC1)C(=O)O	0.59
1731	C1=CC=C2C(=C1)NC3=CC=CC=C3S2	0.0043
1732	C1=CC(=CC=C1C2=CC=C(C=C2)N)N	0.1977
1733	COC1=C(C=C(C=C1)CC=C)OC	0.1416
1734	C1=CC=C(C=C1)C2(C(=O)N(C(=O)N2)COP(=O)(O)O)C3=CC=CC=C3	0.05
1735	CN(C)CC(C1=CC=C(C=C1)O)C2(CCCCC2)O	0.7
1736	CN(C)CC(C1=CC=C(C=C1)OC)C2(CCCCC2)O	0.73
1737	C1CCN[C@@H](C1)C2(CN(C2)C(=O)C3=C(C(=C(C=C3)F)F)NC4=C(C=C(C=C4)I)F)O	0.05
1738	CCC1=C(CN(C1=O)C(=O)NCCC2=CC=C(C=C2)S(=O)(=O)NC(=O)NC3CCC(CC3)C)C	0.005
1739	C=CC(=O)N1CCC[C@H](C1)N2C3=NC=NC(=C3C(=N2)C4=CC=C(C=C4)OC5=CC=CC=C5)N	0.03
1740	C1=C(C(=CC(=C1Cl)Cl)Cl)OCC(=O)O	0.0127
1741	CCOC1=CC=CC=C1C(=O)N	0.5
1742	CC(C)N1C2=CC=CC=C2C(=C1/C=C/[C@H](C[C@H](CC(=O)O)O)O)C3=CC=C(C=C3)F	0.0079
1743	CCOC(=O)C1=CC=C(C=C1)N	0.338
1744	CC1=NC(=NC(=N1)OC)NC(=O)NS(=O)(=O)C2=CC=CC=C2CCC(F)(F)F	0
1745	CCCOC(=O)C1=CC=C(C=C1)O	0.07639
1746	C1=CC=C(C=C1)COC(=O)C2=CC=C(C=C2)O	0.00674
1747	CCCNC(=O)NS(=O)(=O)C1=CC=C(C=C1)Cl	0.03
1748	CCCCOC(=O)C1=CC=C(C=C1)O	0.04157
1749	CCCCC(CC)C(=O)OCCOCCOCCOC(=O)C(CC)CCCC	0
1750	CC(C1CC1)C(CN2C=NC=N2)(C3=CC=C(C=C3)Cl)O	0.1086
1751	CC1=NC(=C(C(=O)N1)C#N)NCC2=CN=CC=C2	0.05
1752	C=CCC1=CC2=C(C=C1)OCO2	0.01789
1753	CC1=C(C=CC(=C1)Cl)OCC(=O)O	0.01797
1754	C1=CC(=C(C=C1Cl)Cl)OCC(=O)O	0.04001
1755	C1=CC(=C(C=C1Cl)Cl)OCCCC(=O)O	0.006623
1756	COC1=NN(C(=O)S1)CSP(=S)(OC)OC	0.2685
1757	C1=CN(C(=O)N=C1N)[C@H]2C([C@@H]([C@H](O2)CO)O)(F)F	1
1758	COC1=CC=CC=C1OCCNC[C@H](COC2=CC=CC3=C2C4=CC=CC=C4N3)O	0.0045
1759	COC1=CC=CC=C1OCCNC[C@@H](COC2=CC=CC3=C2C4=CC=CC=C4N3)O	0.0063
1760	C1=CC2=NNN=C2C=C1	0.287
1761	CCC[C@@H](C(=O)O)N[C@@H](C)C(=O)N1[C@H]2CCCC[C@H]2C[C@H]1C(=O)O	0.16
1762	C1CC(CCC1C2=CC=C(C=C2)Cl)C3=C(C4=CC=CC=C4C(=O)C3=O)O	0.001
1763	CCOC(=O)C1CC(=O)C(=C(C2CC2)O)C(=O)C1	0.137
1764	C1CCC(CC1)[C@@H]2C[C@H](N(C2)C(=O)CP(=O)(CCCCC3=CC=CC=C3)O)C(=O)O	0.006
1765	C[C@H]([C@@H]1[C@@H]2N(C1=O)C(=C(S2)SCCOC(=O)N)C(=O)O)O	0.35
1766	CC1=CC=CC=C1O	0.38
1767	CC1=CC=CC=C1N	0.713
1768	CC1=C(C(=CC=C1)C)NC(=O)CN2CCN(CC2)CC(COC3=CC=CC=C3OC)O	0.38
1769	CC1=CC(=C(C=C1)C)C	0.1556
1770	CC1=C(C=CC(=C1)Cl)N	8.75e-07
1771	C(C(=O)O)O.N.N.[Pt]	0.84
1772	CC(COC1=CC=C(C=C1)OC2=CC=CC=C2)OC3=CC=CC=N3	0.000907
1773	CC1=C(C=C(C=C1)N)Cl	0.145
1774	CN(C)C(=O)C(C1=CC=CC=C1)C2=CC=CC=C2	0.301
1775	CN1CC2CCC(C1)N2C(=O)[C@]34C[C@H]3C5=C(C=CC(=C5)OC)C6=C(C7=C(N6C4)C=C(C=C7)C(=O)NS(=O)(=O)N(C)C)C8CCCCC8	0.01
1776	C1=CC(=C(C=C1Cl)N)N	0.373
1777	C1=C(C(=CC(=C1Cl)Cl)Cl)Cl	0.000993
1778	C1=C(C(=CC(=C1Cl)Cl)Cl)O	0.005322
1779	C[C@@H]1[C@@H]2[C@H](C(=O)N2C(=C1S[C@H]3C[C@H](NC3)C(=O)N(C)C)C(=O)O)[C@@H](C)O	0.87
1780	CC(=O)O[C@@H]1[C@@H](SC2=C(C=CC(=C2)Cl)N(C1=O)CCN(C)C)C3=CC=C(C=C3)OC	0.1
1781	CCOP(=S)(OC1=CN=C(N=C1)C(C)(C)C)OC(C)C	0
1782	CCOP(=O)(OCC)OC1=NC(=NC(=C1)C)C(C)C	0.3269
1783	CC(C)(C)C1=CC=C(C=C1)CSC2=C(C(=O)N(N=C2)C(C)(C)C)Cl	0
1784	CCC1=CC(=C(C=C1)O)C(C)(C)C	0.0454
1785	CC(C)(C)C1=CC(=C(C=C1)O)C(C)(C)C	0.144
1786	C[C@H]([C@@H]1[C@@H]2N(C1=O)C(=C(S2)SC3CCS(=O)C3)C(=O)[O-])O.[Na+]	0.9
1787	CC1=C(C(=CC=C1)C)NC(=O)C2CCCCN2C	0.3
1788	CC1=NC(=O)[C@]([C@@H]2N1CCCC2)(CCN(C(C)C)C(C)C)C3=CC=CC=C3	0.7
1789	C[N@@+]1(CCC2=CC(=C(C=C2[C@H]1CC3=CC(=C(C=C3)OC)OC)OC)OC)CCC(=O)OCCCCCOC(=O)CC[N@+]4(CCC5=CC(=C(C=C5[C@H]4CC6=CC(=C(C=C6)OC)OC)OC)OC)C	0.62
1790	C1=CC(=C(C=C1Cl)CC2=C(C=CC(=C2)Cl)O)O	0.0045
1791	CC1(O[C@@H]2CO[C@@]3([C@H]([C@@H]2O1)OC(O3)(C)C)COS(=O)(=O)N)C	0.72
1792	CC1=C(C2=C(CCC(O2)(C)COC3=CC=C(C=C3)CC4C(=O)NC(=O)S4)C(=C1O)C)C	0.000941
1793	COC1=C(C=CC(=C1)CC=C)O	0.1922
1794	C/C=C/C1=CC(=C(C=C1)O)OC	0
1795	CC1=CC=CC=C1N=NC2=CC(=C(C=C2)N)C	0.00696
1796	CCC1=C2CN3C(=CC4=C(C3=O)COC(=O)[C@@]4(CC)O)C2=NC5=C1C=C(C=C5)OC(=O)N6CCC(CC6)N7CCCCC7	0.51
1797	CN(C)C(=S)SC(=S)N(C)C	0.6276
1798	CCN(CC)C(=S)SSC(=S)N(CC)CC	0.08601
1799	CCOC1=NC(=NC(=N1)NC(=O)NS(=O)(=O)C2=CC=CC=C2C(=O)OC)NC	0.01566
1800	CCCCCCCCCCCC(=O)N(C)CC(=O)O	0.003219
1801	CC(C)CC1=C(C(=NC(=C1C(=O)SC)C(F)(F)F)C(F)F)C(=O)SC	0
1802	C[C@]12CC[C@H]3[C@H]([C@@H]1CC[C@@H]2C(=O)NC(C)(C)C)CC[C@@H]4[C@@]3(C=CC(=O)N4)C	0.095
1803	CC(C)(C)C1=CC=C(C=C1)O	0.1052
1804	CC(=O)C1=CC=CC=C1	0.326
1805	C1=CC=C(C=C1)C(Cl)Cl	1.03e-07
1806	CCC(C)SP(=O)(N1CCSC1=O)OCC	0.4599
1807	CCNC1=CC2=C(C=C1C)C(=C3C=C(C(=[NH+]CC)C=C3O2)C)C4=CC=CC=C4C(=O)OCC.[Cl-]	3.14e-07
1808	C1=CC=C(C=C1)[N+](=O)[O-]	0.3844
1809	CC1=NC2=NC(=NN2C=C1)S(=O)(=O)NC3=C(C=CC=C3F)F	0.01727
1810	CN(C)C1=CC(=CC=C1)O	0.242
1811	CC1=CC(=CC=C1)[N+](=O)[O-]	0.07728
1812	C1CC2=C(C=CC(=C2)F)OC1C(CNCC(C3CCC4=C(O3)C=CC(=C4)F)O)O	0.02
1813	C1=C(C=C(C(=C1Cl)N)Cl)[N+](=O)[O-]	0
1814	CCC(C)(C)OC	0.8097
1815	C1=CC(=C(C=C1[N+](=O)[O-])Cl)Cl	1.21e-07
1816	COC1=C(C=C(C=C1)[N+](=O)[O-])N	0.3359
1817	CCCCCC(C)OC(=O)COC1=C2C(=C(C=C1)Cl)C=CC=N2	0.0028
1818	CC1=NC=CN1CC2CCC3=C(C2=O)C4=CC=CC=C4N3C	0.25
1819	CC(C)C1=CC(=CC=C1)C(C)C	0.01237
1820	C1=CC(=CC(=C1)[N+](=O)[O-])[N+](=O)[O-]	0.391
1821	CCCC(CCC)C(=O)O	0.214
1822	CO[C@@]1([C@@H]2N(C1=O)C(=C(CO2)CSC3=NN=NN3CCO)C(=O)O)NC(=O)CSC(F)F	0.64
1823	CCC(C)C1=CC=C(C=C1)O	0.0608
1824	CCCN(CCC1=CC=CS1)[C@H]2CCC3=C(C2)C=CC=C3O	0.08
1825	COC(=O)C1=CC=C(C=C1)O	0.07056
1826	CC1=CC=C(C=C1)N(C)C	0.05498
1827	CC1=CC=C(C=C1)[N+](=O)[O-]	0.2659
1828	NC1=CC2=C3N(CCC3=C1)C(=O)[C@H](NC(=O)C1=CC=CN=C1)N=C2C1=CC=CC=C1	0.198
1829	FC1(F)C[C@@H](C#N)N(C1)C(=O)CNC1CC2CCC(C1)N2C1=NC=CC=N1	0.702
1830	CC1=C2N=C(C3=CC=CC=C3Cl)C3=C(NC2=NN1)C=CC(=C3)[N+]([O-])=O	0.0135
