# Supplementary material for: Insights into pharmacokinetic properties for exposure chemicals: predictive modelling of human plasma fraction unbound (fu) and hepatocyte intrinsic clearance (Clint) data using machine learning
Source: Royal Society of Chemistry journal article supplement (doi:10.1039/d4dd00082j), 2024-01-01
Supplement: d4dd00082j7.xlsx [file d4dd00082j7.xlsx]

## Sheet: Sheet1
Insights into Pharmacokinetic Properties for Exposure Chemicals: Predictive Modelling of Human Plasma Fraction Unbound (fu) and Hepatocyte Intrinsic Clearance (Clint) Data Using Machine Learning
Souvik Pore, Kunal Roy*
Drug Theoretics and Cheminformatics Laboratory
Department of Pharmaceutical Technology, Jadavpur University
188 Raja S C Mullick Road, 700032, Kolkata, India
Supplementary Information -1 (SI-1)
*Corresponding Author
Prof. Kunal Roy, Phone: +919831594140; Fax: +91-33-2837-1078
Email: kunalroy_in@yahoo.com; kunal.roy@jadavpuruniversity.in

## Sheet: Fraction Unbound
					Training Set																	Test Set
		ID	GD	Eta_betaS_A	Eta_D_epsiB	Eta_D_epsiD	nN+	C-032	MaxsssN	B03[C-S]	B03[N-I]	B05[C-N]	ESOL	SAscore	log(1+res)			ID	GD	Eta_betaS_A	Eta_D_epsiB	Eta_D_epsiD	nN+	C-032	MaxsssN	B03[C-S]	B03[N-I]	B05[C-N]	ESOL	SAscore	log(1+res)
		3	-0.309278	0.523979	1.95369	-0.0561243	-0.141356	-0.180397	-0.722768	-0.531751	-0.0912874	-1.43628	-0.640765	0.184299	-0.256912			7	-0.619752	0.271003	-0.923404	-0.185654	-0.141356	-0.180397	-0.722768	-0.531751	-0.0912874	-1.43628	-0.0291635	1.02263	0.0527652
		4	0.499113	-1.10983	0.949991	0.364454	-0.141356	-0.180397	-0.722768	-0.531751	-0.0912874	-1.43628	0.104068	-0.903722	-0.674563			8	1.91552	0.306138	-1.41021	0.420148	-0.141356	-0.180397	1.11304	-0.531751	-0.0912874	-1.43628	1.91127	-1.19587	2.04036
		5	-0.975656	0.0338371	1.93463	0.147452	-0.141356	-0.180397	-0.722768	1.87885	-0.0912874	0.695605	-1.88315	0.038624	-0.841464			9	-0.454374	-0.652362	-0.458271	-0.18466	-0.141356	-0.180397	1.8542	-0.531751	-0.0912874	0.695605	-0.0308273	-0.0815604	-0.224527
		6	0.208514	1.61959	-0.588872	1.56431	-0.141356	-0.180397	0.0383378	-0.531751	-0.0912874	0.695605	1.69602	0.230404	1.13847			12	-0.0148443	-0.611086	-0.0997492	0.101871	-0.141356	-0.180397	-0.722768	-0.531751	-0.0912874	0.695605	0.341496	-0.745434	-0.260525
		10	0.520372	-2.7939	-1.41021	-0.246778	-0.141356	-0.180397	-0.722768	-0.531751	-0.0912874	-1.43628	0.343748	-1.15181	2.04036			26	1.19005	2.03896	-1.41021	2.1992	-0.141356	9.31662	-0.722768	-0.531751	-0.0912874	0.695605	0.985482	-0.432526	0.728425
		11	0.22274	0.197218	-0.718515	-1.00867	-0.141356	-0.180397	-0.722768	-0.531751	-0.0912874	-1.43628	1.38577	0.387825	2.04036			28	-0.650956	-1.15199	0.173735	-0.708801	-0.141356	-0.180397	-0.722768	-0.531751	-0.0912874	0.695605	-2.36143	-0.171267	-0.841633
		13	0.706392	0.976418	-0.610147	1.79575	-0.141356	-0.180397	0.886734	-0.531751	-0.0912874	0.695605	1.5613	0.615728	2.04036			33	0.706392	-0.531711	0.781767	0.0365746	-0.141356	-0.180397	-0.722768	-0.531751	-0.0912874	-1.43628	0.502478	-0.786013	-0.749566
		16	-0.813659	-0.238464	-1.01008	-0.651831	-0.141356	-0.180397	-0.722768	-0.531751	-0.0912874	-1.43628	-0.825204	0.956755	-0.333472			42	0.0445517	-0.456305	-0.630173	-0.481163	-0.141356	-0.180397	-0.722768	-0.531751	-0.0912874	-1.43628	-0.145327	0.286913	-0.445727
		17	-0.108181	1.50426	-0.979739	-1.00867	-0.141356	-0.180397	0.768776	-0.531751	-0.0912874	0.695605	0.922755	-0.653598	0.871852			45	0.22274	-2.11053	-0.415122	-1.00867	-0.141356	-0.180397	-0.722768	-0.531751	-0.0912874	-1.43628	-0.0931261	-1.00239	-0.801064
		18	-0.335468	-0.712031	0.983984	0.778377	-0.141356	-0.180397	-0.722768	-0.531751	-0.0912874	0.695605	-1.3183	0.0446091	-0.841489			51	-0.461815	1.16493	0.846212	-0.440522	-0.141356	-0.180397	-0.722768	1.87885	-0.0912874	0.695605	0.11873	0.371645	-0.759297
		22	1.51248	-0.456305	2.09831	0.406846	-0.141356	-0.180397	-0.722768	-0.531751	-0.0912874	-1.43628	0.866139	-1.53191	-0.293193			56	0.926234	0.0338371	-1.41021	0.96487	-0.141356	-0.180397	0.995163	-0.531751	-0.0912874	0.695605	1.6951	-0.771333	1.82709
		25	2.43372	-2.41687	0.422601	-1.00867	-0.141356	-0.180397	-0.722768	-0.531751	-0.0912874	-1.43628	0.556274	-1.1174	-0.153098			57	0.926234	-1.08012	-1.41021	1.04987	-0.141356	-0.180397	1.52308	-0.531751	-0.0912874	-1.43628	1.74329	-1.38568	2.04036
		27	-0.598702	1.60929	-0.326354	0.0935087	-0.141356	2.98528	-0.722768	1.87885	-0.0912874	0.695605	0.541514	0.167585	-0.802476			60	-0.59575	-1.66281	-1.41021	-1.00867	-0.141356	-0.180397	-0.722768	-0.531751	-0.0912874	-1.43628	-0.552594	-0.458304	-0.68412
		29	-1.11364	0.85074	-0.373966	-0.136064	-0.141356	-0.180397	1.23334	-0.531751	-0.0912874	0.695605	-1.65803	1.87712	-0.800261			62	0.679818	-1.01647	1.03354	-1.00867	-0.141356	-0.180397	-0.722768	-0.531751	-0.0912874	0.695605	-0.226629	-1.57016	-0.841621
		30	2.15735	5.4254	-1.41021	-1.00867	-0.141356	-0.180397	1.95194	-0.531751	-0.0912874	-1.43628	1.54584	1.23014	0.412308			65	-0.406009	0.720036	0.940918	-0.424354	-0.141356	-0.180397	-0.722768	1.87885	-0.0912874	0.695605	-0.229049	0.303681	-0.755222
		31	-0.41717	1.54197	-0.0129385	-0.486239	-0.141356	-0.180397	1.62356	-0.531751	-0.0912874	0.695605	0.2951	-0.0729863	1.48516			73	-0.568259	0.625388	-0.00336061	-0.588903	-0.141356	-0.180397	1.77092	1.87885	-0.0912874	0.695605	-0.611194	-0.322823	-0.783827
		34	-0.722582	0.553685	-0.116332	1.13293	-0.141356	-0.180397	1.24631	-0.531751	-0.0912874	0.695605	0.740459	0.680188	-0.820895			87	-0.979064	1.28642	-0.226743	-0.0956771	-0.141356	-0.180397	1.28287	-0.531751	-0.0912874	0.695605	-0.89462	1.54373	-0.787929
		36	0.520372	-0.316264	0.219306	-0.0991024	-0.141356	-0.180397	-0.722768	-0.531751	-0.0912874	-1.43628	0.211595	-1.14631	-0.508956			94	-0.598702	-0.316264	-0.0153861	0.284513	-0.141356	-0.180397	-0.722768	1.87885	-0.0912874	0.695605	0.232629	-0.173432	-0.800261
		37	1.19005	-1.08012	0.31593	-1.00867	-0.141356	-0.180397	-0.722768	-0.531751	-0.0912874	-1.43628	0.878621	-1.02666	1.60367			102	2.43372	-1.80419	0.108539	1.08291	-0.141356	-0.180397	-0.722768	-0.531751	-0.0912874	0.695605	0.834539	-0.740375	0.622193
		39	-0.260913	-0.316264	-0.497969	0.162142	-0.141356	-0.180397	1.68421	1.87885	-0.0912874	0.695605	0.894131	-0.675855	1.95636			109	5.54292	-2.41687	-1.41021	-1.00867	-0.141356	-0.180397	-0.722768	-0.531751	-0.0912874	-1.43628	1.06338	0.172755	1.15574
		40	0.679818	-0.666366	0.726833	0.866138	-0.141356	-0.180397	-0.722768	-0.531751	-0.0912874	-1.43628	0.190479	-1.65865	-0.284457			115	2.43372	-1.80419	0.448636	0.271672	-0.141356	-0.180397	-0.722768	-0.531751	-0.0912874	-1.43628	0.749138	-1.1401	0.446
		41	-0.0148443	-0.353117	-0.134917	-1.00867	-0.141356	-0.180397	1.57484	-0.531751	-0.0912874	0.695605	-0.28359	-0.526896	-0.837024			121	3.12466	-1.71667	0.971702	0.471485	-0.141356	-0.180397	-0.722768	-0.531751	-0.0912874	-1.43628	0.930337	-2.05276	1.16447
		43	0.499113	-1.10983	0.476553	1.2093	-0.141356	-0.180397	-0.722768	-0.531751	-0.0912874	0.695605	0.27487	-0.748083	0.122591			122	-0.392818	-1.52571	-1.41021	-1.00867	-0.141356	-0.180397	-0.722768	-0.531751	-0.0912874	-1.43628	0.034294	-1.20991	-0.841632
		47	1.51248	-1.43659	-0.322063	-0.0790772	-0.141356	-0.180397	-0.722768	-0.531751	-0.0912874	-1.43628	0.560295	-1.06026	-0.291736			124	-0.220768	0.779705	-0.644269	-0.5217	-0.141356	-0.180397	2.00334	-0.531751	-0.0912874	0.695605	0.0432189	0.528833	0.406153
		48	-0.750062	-0.0404268	0.0111881	0.117271	-0.141356	-0.180397	-0.722768	1.87885	-0.0912874	0.695605	-0.69201	-0.500972	-0.755222			125	5.54292	-0.456305	-1.41021	-1.00867	-0.141356	-0.180397	-0.722768	-0.531751	-0.0912874	-1.43628	1.57613	-1.78423	1.65987
		49	0.27964	1.66764	-0.189397	-1.00867	-0.141356	-0.180397	-0.722768	-0.531751	-0.0912874	-1.43628	-0.948119	2.52057	-0.797463			128	1.91552	-2.41687	-1.41021	-1.00867	-0.141356	-0.180397	-0.722768	-0.531751	-0.0912874	-1.43628	1.70701	-1.23996	1.89223
		50	-0.6445	0.0338371	-0.890086	-0.240465	-0.141356	-0.180397	2.03954	-0.531751	-0.0912874	0.695605	-0.37276	0.469743	-0.800261			129	-0.50646	-0.154679	0.621587	-0.451084	-0.141356	-0.180397	-0.722768	-0.531751	-0.0912874	0.695605	-0.388615	-0.264761	-0.706639
		52	-0.0536334	-0.549665	-0.231973	-0.566006	-0.141356	-0.180397	-0.722768	-0.531751	-0.0912874	0.695605	-0.60019	0.321004	-0.407721			135	-0.521932	1.08414	-0.0960023	0.789155	-0.141356	-0.180397	1.00676	-0.531751	-0.0912874	0.695605	0.060544	0.385048	0.98056
		53	2.43372	-0.316264	-1.41021	2.53263	-0.141356	-0.180397	-0.722768	1.87885	-0.0912874	-1.43628	1.72573	0.794265	0.545467			137	2.43372	-1.01647	-1.41021	4.52462	-0.141356	-0.180397	-0.722768	-0.531751	-0.0912874	0.695605	2.51935	-1.12568	1.97287
		54	-0.450169	-0.170389	-0.598067	0.474559	-0.141356	-0.180397	1.66063	-0.531751	-0.0912874	0.695605	0.462683	-0.395523	0.731844			141	1.91552	-3.64223	-1.41021	-1.00867	-0.141356	-0.180397	-0.722768	-0.531751	-0.0912874	-1.43628	0.37862	-1.83006	-0.433648
		58	-0.658757	1.10602	0.149261	-1.00867	-0.141356	-0.180397	1.53856	-0.531751	-0.0912874	0.695605	-1.11852	0.249162	-0.638771			142	1.91552	-1.80419	-1.41021	0.519133	-0.141356	-0.180397	-0.722768	-0.531751	-0.0912874	-1.43628	1.62249	-1.29476	1.67828
		61	-0.711211	-1.74081	-1.41021	-1.00867	-0.141356	-0.180397	-0.722768	-0.531751	-0.0912874	-1.43628	-0.95611	-0.42761	-0.713649			152	-0.335468	0.779705	0.651125	-1.00867	-0.141356	-0.180397	-0.722768	-0.531751	-0.0912874	0.695605	-0.712589	0.448677	-0.739614
		64	-0.184547	-0.946447	-0.441983	0.784837	-0.141356	-0.180397	-0.722768	-0.531751	-0.0912874	-1.43628	0.0791317	-1.20186	-0.837876			153	-1.06872	0.13595	-0.818091	-0.467053	-0.141356	-0.180397	1.41094	1.87885	-0.0912874	0.695605	-0.76831	2.1268	1.64823
		66	-0.108181	0.0338371	-0.205973	0.153321	-0.141356	-0.180397	1.58827	1.87885	-0.0912874	0.695605	0.814652	0.250997	1.67101			157	-0.406009	-0.0641913	0.0745528	-0.530764	-0.141356	-0.180397	-0.722768	1.87885	-0.0912874	0.695605	-0.11575	0.331951	-0.797792
		67	1.91552	-1.32767	-0.14134	0.0242108	-0.141356	-0.180397	-0.722768	-0.531751	-0.0912874	-1.43628	0.745805	-1.78235	-0.0353422			160	-0.471736	1.21381	-0.136025	-0.048153	-0.141356	-0.180397	1.35551	-0.531751	-0.0912874	0.695605	0.256138	-0.0107454	1.60229
		69	1.19005	-0.634538	0.598833	1.04987	-0.141356	-0.180397	-0.722768	-0.531751	-0.0912874	-1.43628	1.04472	-1.22138	1.91329			164	0.208514	0.177996	0.745168	0.555726	-0.141356	-0.180397	-0.722768	-0.531751	-0.0912874	-1.43628	0.147744	-0.662639	2.00696
		70	-0.108181	0.278908	-0.576563	0.206139	-0.141356	-0.180397	-0.722768	-0.531751	-0.0912874	0.695605	0.569924	0.392593	0.971967			166	-0.785209	0.103857	0.51535	-0.315962	-0.141356	-0.180397	0.786031	1.87885	-0.0912874	0.695605	-0.9838	-0.061052	-0.820895
		71	1.19005	-1.97129	-0.458557	0.551485	-0.141356	-0.180397	-0.722768	-0.531751	-0.0912874	0.695605	0.452483	-1.112	-0.599752			167	-0.760823	1.78434	-0.208794	0.142837	4.66476	-0.180397	0.518742	1.87885	-0.0912874	0.695605	0.999528	1.28885	1.46133
		74	-0.406009	-0.652362	-0.147264	-1.00867	-0.141356	-0.180397	-0.722768	-0.531751	-0.0912874	-1.43628	-0.72135	0.323443	-0.841633			168	0.520372	-1.01647	-1.41021	-1.00867	-0.141356	-0.180397	1.51215	1.87885	-0.0912874	-1.43628	0.312005	-0.917618	-0.841633
		77	0.706392	-1.28578	-1.41021	-1.00867	-0.141356	-0.180397	-0.722768	-0.531751	-0.0912874	-1.43628	0.406218	-1.0018	-0.564207			176	-0.00486173	1.12304	-0.763334	2.58396	-0.141356	-0.180397	0.492777	-0.531751	-0.0912874	0.695605	2.20002	0.0609056	2.04036
		78	-1.1664	-0.181137	-1.08887	-0.34817	-0.141356	-0.180397	0.554954	-0.531751	-0.0912874	0.695605	-1.80477	2.6034	-0.800261			177	-1.10873	0.0818902	-1.41021	0.243101	-0.141356	-0.180397	1.3177	-0.531751	-0.0912874	0.695605	-0.562194	1.92763	1.0214
		79	-1.37526	1.62276	-1.41021	2.40115	-0.141356	-0.180397	-0.722768	1.87885	-0.0912874	0.695605	3.22441	3.49768	-0.0490645			180	-0.267194	0.479421	-0.631388	0.141584	-0.141356	-0.180397	-0.722768	-0.531751	-0.0912874	0.695605	0.77098	0.393582	0.717009
		80	-0.919827	0.73404	-0.176211	0.764288	-0.141356	-0.180397	1.54767	-0.531751	-0.0912874	0.695605	-0.169404	1.12088	-0.48332			182	0.208514	-0.68696	1.68103	1.01456	-0.141356	-0.180397	-0.722768	-0.531751	-0.0912874	-1.43628	0.31461	-0.693427	-0.765416
		81	1.51248	-0.946447	0.345059	0.160363	-0.141356	-0.180397	-0.722768	-0.531751	-0.0912874	-1.43628	1.0533	-0.851518	1.912			184	-1.08322	1.30458	-0.0128037	-0.0737347	-0.141356	-0.180397	1.57839	1.87885	-0.0912874	0.695605	-1.72705	3.47268	-0.59936
		82	-0.560317	-0.841416	0.139057	-1.00867	-0.141356	-0.180397	1.57736	-0.531751	-0.0912874	0.695605	-1.30455	-0.315436	-0.834778			185	-1.15887	0.202852	-0.457807	0.0831478	-0.141356	-0.180397	-0.722768	-0.531751	-0.0912874	0.695605	-1.04646	2.20066	-0.678559
		84	-0.397598	0.238063	1.62213	-1.00867	-0.141356	-0.180397	-0.722768	-0.531751	-0.0912874	0.695605	-0.512584	-0.102015	-0.780548			192	-0.19182	-0.316264	-0.414709	0.162142	-0.141356	-0.180397	1.19579	1.87885	-0.0912874	0.695605	0.275466	-0.513682	-0.579794
		85	2.43372	-0.57884	-1.41021	0.400782	-0.141356	-0.180397	-0.722768	-0.531751	-0.0912874	-1.43628	1.4208	-1.54392	1.51121			202	-0.450169	-1.19152	-0.726298	0.436646	-0.141356	-0.180397	-0.722768	-0.531751	-0.0912874	-1.43628	-0.463521	-1.17636	-0.841633
		86	-0.345027	-0.374614	0.171796	-0.532253	-0.141356	-0.180397	0.655991	-0.531751	-0.0912874	-1.43628	-0.787782	-0.52414	-0.672567			204	-0.204382	0.256629	2.29401	1.76263	-0.141356	-0.180397	-0.722768	-0.531751	-0.0912874	-1.43628	0.422914	-0.326505	-0.769091
		88	-0.335468	-0.925136	-0.709158	-0.0467436	-0.141356	-0.180397	-0.722768	-0.531751	-0.0912874	0.695605	-0.165972	-0.555808	-0.722771			211	-0.406009	0.523979	0.0590279	-0.516462	-0.141356	-0.180397	-0.722768	1.87885	-0.0912874	0.695605	0.288973	0.174888	-0.690571
		89	0.360926	-2.06677	-0.803054	-1.00867	-0.141356	-0.180397	-0.722768	-0.531751	-0.0912874	-1.43628	0.41811	-1.06118	-0.111381			212	0.22274	1.25919	-0.491286	3.19893	-0.141356	-0.180397	-0.722768	-0.531751	-0.0912874	-1.43628	2.15298	-0.106006	1.55583
		90	-0.357644	1.11215	0.192191	0.515198	-0.141356	-0.180397	1.21256	-0.531751	-0.0912874	0.695605	0.108123	0.0655166	1.95636			217	0.926234	0.0338371	5.39737	-1.00867	-0.141356	-0.180397	-0.722768	-0.531751	-0.0912874	-1.43628	-1.31566	-0.442588	-0.800261
		95	-0.785209	-0.596345	-1.25515	0.251217	-0.141356	-0.180397	-0.722768	1.87885	-0.0912874	-1.43628	-0.710028	1.67754	-0.188837			218	-0.345027	0.646514	0.202246	-0.490938	-0.141356	-0.180397	-0.722768	1.87885	-0.0912874	0.695605	0.0912767	0.419423	-0.718732
		96	0.926234	-2.86246	-0.816508	-0.0990306	-0.141356	-0.180397	-0.722768	-0.531751	-0.0912874	-1.43628	0.633334	-1.07414	-0.841633			224	-0.471736	1.03227	0.688044	-1.00867	-0.141356	-0.180397	-0.722768	-0.531751	-0.0912874	0.695605	-1.03933	0.423339	-0.79409
		97	-0.577789	1.01412	-0.445713	-1.00867	-0.141356	-0.180397	1.89705	-0.531751	-0.0912874	0.695605	-0.735604	-0.300533	-0.445349			235	0.343653	-1.19152	0.27681	1.08291	-0.141356	-0.180397	-0.722768	-0.531751	-0.0912874	0.695605	-0.022302	-0.453429	-0.287003
		98	2.43372	-1.80419	0.448636	0.271672	-0.141356	-0.180397	-0.722768	-0.531751	-0.0912874	-1.43628	0.749138	-0.817033	0.331257			240	-0.122727	0.383938	1.8502	0.713896	-0.141356	-0.180397	-0.722768	1.87885	-0.0912874	0.695605	-0.405973	-0.19186	-0.838723
		99	2.43372	-1.19152	2.08086	-1.00867	-0.141356	-0.180397	-0.722768	-0.531751	-0.0912874	-1.43628	0.0652789	-1.57255	-0.747452			241	-1.41047	0.274103	-0.421769	1.19575	-0.141356	-0.180397	0.67076	-0.531751	-0.0912874	0.695605	-0.514505	2.8545	-0.296839
		100	2.43372	-1.19152	1.11458	1.48131	-0.141356	-0.180397	-0.722768	-0.531751	-0.0912874	-1.43628	0.654965	-1.595	0.132471			242	0.499113	-1.10983	1.07824	-0.287037	-0.141356	-0.180397	-0.722768	-0.531751	-0.0912874	-1.43628	-0.372182	-0.979477	-0.841619
		101	2.43372	-1.19152	1.69677	0.493003	-0.141356	-0.180397	-0.722768	-0.531751	-0.0912874	-1.43628	0.569564	-1.67166	0.0190983			243	0.520372	-0.316264	1.0725	0.0173601	-0.141356	-0.180397	-0.722768	-0.531751	-0.0912874	-1.43628	0.133229	-0.634772	-0.806321
		103	1.51248	-1.32767	-1.41021	3.0583	-0.141356	-0.180397	-0.722768	-0.531751	-0.0912874	0.695605	2.18304	-1.09437	1.78309			246	0.926234	-0.783066	0.491034	0.0490397	-0.141356	-0.180397	-0.722768	-0.531751	-0.0912874	-1.43628	0.844276	-1.07451	-0.423859
		105	1.19005	-0.456305	-1.41021	-1.00867	-0.141356	-0.180397	-0.722768	-0.531751	-0.0912874	-1.43628	1.75542	-1.34339	2.04015			247	1.51248	-0.946447	0.0928897	0.992536	-0.141356	-0.180397	-0.722768	-0.531751	-0.0912874	-1.43628	0.860567	-0.710544	0.570115
		106	-1.28749	0.497485	-0.349532	-1.00867	9.47088	-0.180397	-0.722768	-0.531751	-0.0912874	0.695605	-1.20021	1.69849	1.36463			251	1.91552	-0.783066	2.42184	0.473022	-0.141356	-0.180397	-0.722768	-0.531751	-0.0912874	-1.43628	0.206054	-1.28869	0.0190983
		107	0.0899721	2.21225	-0.719086	1.82393	-0.141356	-0.180397	-0.722768	-0.531751	-0.0912874	0.695605	1.6485	-0.108549	1.95636			258	0.315203	0.466315	-0.0356009	-0.401093	-0.141356	2.98528	-0.722768	-0.531751	-0.0912874	0.695605	-0.0601081	-0.920126	-0.83274
		110	5.54292	-3.64223	0.335325	-1.00867	-0.141356	-0.180397	-0.722768	-0.531751	-0.0912874	-1.43628	1.66829	-0.865022	1.74577			261	-1.10608	0.791329	-0.211959	-0.34353	-0.141356	-0.180397	0.806083	1.87885	-0.0912874	0.695605	-1.44425	1.71995	-0.751152
		111	0.706392	-1.59997	-1.41021	4.1127	-0.141356	-0.180397	-0.722768	-0.531751	-0.0912874	0.695605	2.21547	-0.91047	1.95657			263	0.360926	-0.456305	0.410259	1.53049	-0.141356	-0.180397	-0.722768	-0.531751	-0.0912874	-1.43628	0.89481	-1.17692	-0.735721
		112	-0.392818	-0.0727155	-0.26704	1.08275	-0.141356	-0.180397	-0.722768	-0.531751	-0.0912874	0.695605	0.331034	-0.141811	-0.800261			264	0.343653	0.952853	-1.41021	0.691279	-0.141356	-0.180397	0.72531	1.87885	-0.0912874	0.695605	1.60661	-0.0747121	1.95636
		113	-1.5442	0.352291	-1.26162	2.21884	-0.141356	-0.180397	-0.722768	1.87885	-0.0912874	0.695605	1.0894	6.3816	0.844225			266	-0.406009	0.523979	0.182701	-0.516462	-0.141356	-0.180397	1.47558	1.87885	-0.0912874	0.695605	0.0483324	-0.0055353	-0.833325
		114	-0.19182	-0.316264	-0.544939	-0.452706	-0.141356	-0.180397	-0.722768	-0.531751	-0.0912874	0.695605	-0.282458	-0.0368485	-0.575853			268	0.706392	1.73048	-1.41021	0.870946	-0.141356	9.31662	-0.722768	-0.531751	-0.0912874	0.695605	0.691308	-0.472802	0.199363
		116	2.43372	-1.80419	0.108539	1.08291	-0.141356	-0.180397	-0.722768	-0.531751	-0.0912874	-1.43628	0.834539	-1.0427	0.977876			269	0.679818	-0.666366	1.00316	0.395402	-0.141356	-0.180397	-0.722768	-0.531751	-0.0912874	-1.43628	0.105078	-1.69979	-0.606427
		117	2.43372	-1.19152	1.37828	1.74137	-0.141356	-0.180397	-0.722768	-0.531751	-0.0912874	-1.43628	1.05801	-1.73356	1.47279			281	-0.0318145	2.48455	-0.65236	1.72201	-0.141356	2.98528	-0.722768	-0.531751	-0.0912874	0.695605	0.937098	0.680735	0.926561
		118	0.0700071	0.162822	1.16944	-0.406124	-0.141356	-0.180397	-0.722768	-0.531751	-0.0912874	0.695605	-0.256906	-0.565314	-0.718732			284	4.09196	0.85074	-1.41021	-1.00867	-0.141356	-0.180397	-0.722768	-0.531751	-0.0912874	-1.43628	1.84846	-1.11819	1.91329
		123	-1.41954	1.60141	-0.8673	0.0512552	-0.141356	-0.180397	-0.722768	-0.531751	-0.0912874	0.695605	-2.65506	4.76861	-0.678559			286	1.19005	-2.41687	-1.41021	0.160363	-0.141356	-0.180397	-0.722768	-0.531751	-0.0912874	-1.43628	0.803435	-1.66146	-0.841633
		126	5.54292	-0.456305	1.19019	-1.00867	-0.141356	-0.180397	-0.722768	-0.531751	-0.0912874	-1.43628	1.27414	-1.47576	1.16729			294	-0.292456	-0.170389	1.32788	0.314708	-0.141356	-0.180397	-0.722768	-0.531751	-0.0912874	0.695605	-0.392197	-0.345356	-0.73248
		127	-0.968869	0.99281	-0.937361	-1.00867	-0.141356	2.98528	1.90598	-0.531751	-0.0912874	0.695605	-2.23856	1.13838	-0.81676			304	-0.785209	0.383938	0.735447	2.24641	-0.141356	-0.180397	-0.722768	-0.531751	-0.0912874	-1.43628	0.958084	0.692548	-0.841633
		131	-0.551105	-1.63265	-1.24489	-0.554599	-0.141356	-0.180397	0.673365	-0.531751	-0.0912874	0.695605	-0.469797	-1.15321	-0.841633			309	-0.0148443	-0.353117	-0.220544	0.261629	-0.141356	-0.180397	-0.722768	-0.531751	-0.0912874	0.695605	-0.669829	-0.80327	-0.610397
		132	0.926234	-0.634538	0.000182546	1.17988	-0.141356	-0.180397	-0.722768	-0.531751	-0.0912874	0.695605	1.79783	-0.591641	2.04036			310	-0.220768	0.99281	0.37407	0.644655	-0.141356	-0.180397	1.09122	-0.531751	-0.0912874	0.695605	0.465734	0.191218	1.57912
		133	-0.513074	0.306138	0.454068	-1.00867	-0.141356	-0.180397	1.21856	-0.531751	-0.0912874	0.695605	-0.442457	-0.351055	-0.467026			313	-0.483547	1.25919	0.149388	0.406144	-0.141356	-0.180397	1.21248	-0.531751	-0.0912874	0.695605	-0.209077	1.07839	0.871852
		134	3.12466	-4.05068	-1.41021	-1.00867	-0.141356	-0.180397	-0.722768	-0.531751	-0.0912874	-1.43628	0.683576	-1.8483	-0.107546			322	-1.51736	0.429113	-0.883976	1.41277	-0.141356	-0.180397	0.777781	-0.531751	-0.0912874	0.695605	1.24442	4.84678	2.04036
		138	0.343653	-0.272502	0.553516	1.05539	-0.141356	-0.180397	-0.130847	1.87885	-0.0912874	0.695605	0.347839	-0.241536	-0.560319			334	-0.713363	-1.15199	-0.773675	0.0651243	-0.141356	-0.180397	-0.722768	-0.531751	-0.0912874	-1.43628	-0.296244	0.343007	-0.445349
		139	2.43372	-1.01647	-1.41021	2.75397	-0.141356	-0.180397	-0.722768	-0.531751	-0.0912874	-1.43628	2.32681	-1.11056	1.97752			354	-0.204382	0.0338371	-0.210777	-0.482679	-0.141356	-0.180397	-0.722768	-0.531751	-0.0912874	0.695605	-0.508337	0.0952805	-0.306698
		140	0.520372	-1.66281	-1.41021	-1.00867	-0.141356	-0.180397	1.37296	1.87885	-0.0912874	0.695605	0.537222	-0.892473	-0.841633			363	-0.6445	-0.292924	0.280848	-0.227554	-0.141356	-0.180397	-0.722768	1.87885	-0.0912874	0.695605	-0.727239	-0.0790857	-0.771544
		144	0.22274	-2.09011	-1.41021	-1.00867	-0.141356	-0.180397	-0.722768	-0.531751	-0.0912874	-1.43628	0.144237	-1.5659	-0.693097			365	-0.658757	-0.119332	0.0996427	-0.36217	-0.141356	-0.180397	1.96856	-0.531751	-0.0912874	0.695605	-0.855117	0.217666	-0.759297
		145	1.51248	-3.50608	-1.41021	-1.00867	-0.141356	-0.180397	-0.722768	-0.531751	-0.0912874	-1.43628	0.2297	-1.81661	-0.516716			373	-0.345027	-0.374614	-0.0526167	0.314708	-0.141356	-0.180397	1.6794	-0.531751	-0.0912874	0.695605	0.0287597	0.0752859	1.1898
		146	1.51248	-2.96147	-1.41021	0.118892	-0.141356	-0.180397	-0.722768	-0.531751	-0.0912874	-1.43628	0.825683	-1.65621	1.23294			382	0.0899721	0.0338371	-0.210703	0.749686	-0.141356	-0.180397	-0.722768	-0.531751	-0.0912874	0.695605	0.793781	0.212846	1.06026
		147	0.926234	-0.634538	-1.41021	-1.00867	-0.141356	-0.180397	-0.722768	-0.531751	-0.0912874	-1.43628	1.6016	-1.37422	1.36194			388	-0.0536334	2.01774	-0.651728	1.03938	-0.141356	2.98528	-0.722768	-0.531751	-0.0912874	0.695605	0.62656	0.429245	0.844225
		148	-0.471736	0.669206	-0.0422096	-0.584451	-0.141356	-0.180397	1.89523	1.87885	-0.0912874	0.695605	-0.179159	-0.4868	-0.188837			390	0.706392	-1.28578	-0.163651	-1.00867	-0.141356	-0.180397	-0.722768	-0.531751	-0.0912874	-1.43628	0.454213	-1.20514	0.290607
		149	0.343653	0.952853	-0.0523038	-1.00867	-0.141356	-0.180397	1.51804	1.87885	-0.0912874	0.695605	0.337035	0.0142452	0.203245			393	0.0899721	-0.510765	1.16071	0.259068	-0.141356	-0.180397	-0.722768	-0.531751	-0.0912874	-1.43628	-0.461362	-0.72092	-0.829178
		150	0.101826	-1.80419	-1.41021	-1.00867	4.66476	-0.180397	-0.722768	-0.531751	-0.0912874	0.695605	0.538802	-1.2016	-0.692977			403	-0.122727	0.85074	-0.244192	0.0627033	-0.141356	-0.180397	1.64839	-0.531751	-0.0912874	0.695605	0.568264	0.459811	1.48516
		154	-0.50646	-1.09726	-0.231532	-0.587131	-0.141356	-0.180397	0.809159	-0.531751	-0.0912874	0.695605	-0.912777	-0.390671	-0.703501			406	0.360926	1.1775	-1.41021	0.574502	-0.141356	9.31662	-0.722768	-0.531751	-0.0912874	0.695605	0.31362	-0.315123	-0.692536
		155	0.706392	0.0338371	-1.41021	-1.00867	-0.141356	-0.180397	-0.722768	-0.531751	-0.0912874	-1.43628	2.00233	-1.11089	1.26563			408	-0.722582	0.999268	-0.479257	-0.616506	-0.141356	-0.180397	1.55081	1.87885	-0.0912874	0.695605	-0.0647525	-0.254251	-0.678559
		156	0.706392	-0.374614	-1.41021	0.163252	-0.141356	-0.180397	-0.722768	-0.531751	-0.0912874	-1.43628	2.04635	-1.08081	2.04036			410	-0.603997	-0.0506701	-0.104125	-0.606202	-0.141356	-0.180397	-0.722768	-0.531751	-0.0912874	0.695605	-0.586511	-0.155442	-0.370431
		158	-0.461815	0.599385	1.52552	-0.474573	-0.141356	-0.180397	0.287255	-0.531751	-0.0912874	0.695605	-0.91145	-0.303151	-0.803968			411	1.19005	-1.52571	1.13357	0.0359481	-0.141356	-0.180397	-0.722768	-0.531751	-0.0912874	-1.43628	0.761908	-1.14624	-0.639167
		161	-0.717263	0.493345	0.122436	0.546031	-0.141356	-0.180397	1.33609	1.87885	-0.0912874	0.695605	0.19502	0.0985021	-0.638771			418	-0.639735	-0.0506701	0.744434	-1.00867	-0.141356	-0.180397	-0.722768	-0.531751	-0.0912874	0.695605	-0.725937	0.00717824	-0.811804
		162	-0.721535	1.66764	0.492071	-0.0618625	-0.141356	-0.180397	-0.722768	-0.531751	-0.0912874	0.695605	-0.967986	1.69159	-0.832496			420	0.22274	0.523979	-0.870935	-1.00867	-0.141356	-0.180397	0.749092	-0.531751	-0.0912874	-1.43628	1.29603	-0.367196	1.70653
		165	-0.908462	1.34468	-0.0283516	-0.196804	-0.141356	-0.180397	1.65022	-0.531751	-0.0912874	0.695605	-0.799474	1.46329	-0.759297			423	-0.677855	-0.619685	-0.82357	0.18149	-0.141356	-0.180397	-0.722768	1.87885	-0.0912874	0.695605	0.115196	-0.177762	0.436838
		170	0.208514	-0.398641	-0.457438	-0.345398	-0.141356	-0.180397	-0.722768	-0.531751	-0.0912874	0.695605	0.507533	-0.209961	1.71621			441	-0.777542	-0.783066	-0.254159	0.0798232	-0.141356	-0.180397	-0.722768	-0.531751	-0.0912874	0.695605	-0.588088	0.427989	-0.800261
		172	-0.122727	-0.549665	0.405754	-1.00867	-0.141356	-0.180397	1.66918	1.87885	-0.0912874	0.695605	-1.05908	-0.493209	-0.800261			445	-0.513074	0.306138	0.343208	-0.0306273	-0.141356	-0.180397	-0.722768	-0.531751	-0.0912874	0.695605	-0.677992	0.174647	-0.521795
		173	-0.882752	0.442289	-0.599665	0.88337	-0.141356	-0.180397	0.73429	-0.531751	-0.0912874	0.695605	1.58155	-0.167022	2.04036			449	-0.483547	0.90909	0.192307	-0.593128	-0.141356	-0.180397	1.96862	1.87885	-0.0912874	0.695605	-0.844783	-0.324912	-0.836646
		174	-0.122727	0.150538	0.373969	-1.00867	-0.141356	-0.180397	1.59682	1.87885	-0.0912874	0.695605	-0.400944	0.113921	-0.759297			455	-0.568259	0.456373	0.0479095	-0.155595	-0.141356	-0.180397	0.756732	1.87885	-0.0912874	0.695605	-0.216948	0.225577	-0.333472
		175	-0.406009	0.720036	0.854807	-1.00867	-0.141356	-0.180397	-0.722768	-0.531751	-0.0912874	0.695605	-0.681865	-0.00927308	-0.819365			472	1.51248	-0.946447	1.09291	2.1734	-0.141356	-0.180397	-0.722768	-0.531751	-0.0912874	0.695605	1.27405	-1.03909	1.523
		181	-0.345027	-0.170389	0.394286	-1.00867	-0.141356	-0.180397	-0.722768	-0.531751	-0.0912874	0.695605	-0.661858	0.145466	-0.764191			473	-0.99372	0.197218	-0.389029	-0.0362162	-0.141356	-0.180397	1.71838	-0.531751	-0.0912874	0.695605	-0.544947	0.851539	0.249235
		183	-0.611144	0.0338371	0.308019	-0.241156	-0.141356	-0.180397	-0.722768	-0.531751	-0.0912874	0.695605	-0.92367	0.369658	-0.800261			485	-0.809595	-0.456305	-1.06173	-0.317158	-0.141356	-0.180397	-0.722768	1.87885	-0.0912874	0.695605	-1.01506	1.30522	-0.0148434
		186	-0.406009	-0.652362	-0.267757	-0.562942	-0.141356	-0.180397	1.77402	1.87885	-0.0912874	0.695605	-0.882639	-0.0559332	-0.678559			487	-0.461815	-0.154679	1.21831	-0.49885	-0.141356	-0.180397	-0.722768	-0.531751	-0.0912874	0.695605	-0.336518	0.141071	-0.759297
		187	-0.639735	-0.219685	0.0770245	-0.121128	-0.141356	-0.180397	1.59697	1.87885	-0.0912874	0.695605	0.276887	-0.230501	0.760225			490	-0.108181	-0.456305	-0.104189	-1.00867	-0.141356	-0.180397	1.21385	-0.531751	-0.0912874	0.695605	-0.0528956	-0.769844	-0.841633
		188	0.0700071	1.45267	-0.246907	-1.00867	-0.141356	-0.180397	-0.722768	1.87885	-0.0912874	-1.43628	-0.58793	2.15228	-0.407721			492	-0.0148443	-0.353117	1.44498	0.261629	-0.141356	-0.180397	-0.722768	-0.531751	-0.0912874	-1.43628	-0.616188	-0.919721	-0.820895
		189	-0.108181	-0.456305	1.97354	-0.333872	-0.141356	-0.180397	-0.722768	-0.531751	-0.0912874	-1.43628	-1.48762	-0.0680555	-0.841633			495	-0.406009	-0.260248	-0.616863	-0.527188	-0.141356	-0.180397	-0.722768	-0.531751	-0.0912874	0.695605	-0.372529	-0.47425	-0.81676
		190	-0.108181	0.0338371	2.56125	0.330386	-0.141356	-0.180397	-0.722768	-0.531751	-0.0912874	0.695605	-1.17826	-0.85653	-0.841633			503	1.45386	2.48455	-0.137424	2.74726	-0.141356	-0.180397	-0.722768	1.87885	-0.0912874	0.695605	1.30754	1.12456	1.61152
		191	-0.951003	0.810891	-1.23052	2.81001	-0.141356	-0.180397	-0.722768	-0.531751	-0.0912874	0.695605	2.87669	1.31586	1.69367			509	-1.19924	0.461739	-0.931455	-0.412304	-0.141356	-0.180397	-0.722768	-0.531751	-0.0912874	-1.43628	-2.21145	3.50897	-0.835903
		193	-0.278118	-0.0727155	1.39585	-1.00867	-0.141356	-0.180397	-0.722768	-0.531751	-0.0912874	-1.43628	-0.960092	-1.16302	-0.829791			512	-0.184547	-0.701376	-0.102097	-0.345202	-0.141356	-0.180397	-0.722768	-0.531751	-0.0912874	0.695605	-0.600277	0.164566	-0.798985
		195	0.360926	0.383938	-1.41021	-1.00867	-0.141356	-0.180397	-0.722768	-0.531751	-0.0912874	-1.43628	0.476813	0.335422	0.674494			513	-0.682159	-0.361439	-0.274448	0.0673292	-0.141356	-0.180397	1.77853	-0.531751	-0.0912874	0.695605	-0.347073	0.120492	-0.0835696
		196	0.706392	-0.783066	-1.41021	0.0937316	-0.141356	-0.180397	-0.722768	-0.531751	-0.0912874	0.695605	1.16211	-0.111735	0.790942			515	0.315203	-0.398641	0.576321	-1.00867	4.66476	-0.180397	-0.722768	-0.531751	-0.0912874	0.695605	-0.253887	-0.639323	1.10997
		197	-0.750062	0.108101	1.10311	0.137112	-0.141356	-0.180397	-0.722768	-0.531751	-0.0912874	0.695605	-1.19217	0.179894	-0.445349			522	-0.267194	-0.188955	1.91697	1.29906	-0.141356	-0.180397	-0.722768	-0.531751	-0.0912874	0.695605	0.10639	-0.75813	-0.800261
		198	1.19005	1.1478	-1.41021	1.42907	-0.141356	-0.180397	0.430879	-0.531751	-0.0912874	-1.43628	1.86316	-0.595175	1.87279			532	-0.00486173	-0.510765	-0.4415	-1.00867	-0.141356	-0.180397	1.04281	-0.531751	-0.0912874	-1.43628	-0.00321271	-0.341363	-0.321714
		199	-0.163418	1.41902	0.998627	-1.00867	-0.141356	-0.180397	-0.722768	-0.531751	-0.0912874	-1.43628	0.255719	0.866175	-0.428374			534	0.892413	1.73048	-1.41021	0.293781	-0.141356	-0.180397	-0.722768	-0.531751	-0.0912874	0.695605	1.83428	0.524268	2.04036
		200	-0.122727	-0.549665	0.341992	-0.514027	-0.141356	-0.180397	-0.722768	1.87885	-0.0912874	0.695605	-0.41049	-0.494324	-0.678559			535	-0.809595	0.243898	-0.0633149	0.462982	-0.141356	-0.180397	1.55448	-0.531751	-0.0912874	0.695605	-0.209145	0.00687312	-0.638771
		201	-0.813659	0.169988	-0.424519	-0.676921	-0.141356	-0.180397	1.76667	-0.531751	-0.0912874	0.695605	-1.09167	0.658904	-0.820895			542	-0.278118	0.5666	1.36025	-1.00867	-0.141356	-0.180397	0.763076	-0.531751	-0.0912874	0.695605	-0.246578	-0.354747	0.0861616
		203	-0.746516	0.799684	2.57761	0.113449	-0.141356	-0.180397	-0.722768	-0.531751	-0.0912874	0.695605	-1.51622	0.355232	-0.841633			543	-0.330006	-1.7485	-0.88249	0.73567	-0.141356	-0.180397	-0.722768	-0.531751	-0.0912874	0.695605	0.0627587	-0.615403	-0.833325
		205	-0.6445	-0.946447	1.37125	-0.625504	-0.141356	-0.180397	-0.722768	-0.531751	-0.0912874	-1.43628	-2.59451	0.16394	-0.794502			551	1.19005	-1.97129	-0.310522	-0.0990306	-0.141356	-0.180397	-0.722768	-0.531751	-0.0912874	-1.43628	0.367082	-1.1664	-0.695385
		206	-0.50646	0.222353	-0.399682	-1.00867	-0.141356	-0.180397	-0.722768	1.87885	-0.0912874	0.695605	-0.859218	0.00484253	-0.794543			553	0.360926	-0.316264	-1.41021	0.0684771	-0.141356	-0.180397	-0.722768	-0.531751	-0.0912874	0.695605	1.49377	-0.170803	1.93083
		207	0.315203	-0.398641	1.50596	0.248055	-0.141356	-0.180397	-0.722768	-0.531751	-0.0912874	0.695605	0.241489	-0.409458	-0.716714			568	1.19005	0.256629	1.95202	0.347824	-0.141356	-0.180397	-0.722768	-0.531751	-0.0912874	-1.43628	0.549188	-0.576636	0.668715
		208	-0.637088	-1.36657	-0.914979	-1.00867	-0.141356	-0.180397	-0.722768	-0.531751	-0.0912874	-1.43628	-1.0647	-0.123908	-0.841633			580	0.520372	0.383938	0.424291	-0.0548361	-0.141356	-0.180397	0.460194	-0.531751	-0.0912874	0.695605	0.494843	-0.92788	-0.0662812
		209	-0.637088	-1.36657	-0.914979	-1.00867	-0.141356	-0.180397	-0.722768	-0.531751	-0.0912874	-1.43628	-1.14757	-0.82863	-0.745867			583	-0.00486173	-0.238464	-0.286521	0.321164	-0.141356	-0.180397	-0.722768	-0.531751	-0.0912874	0.695605	1.28168	-0.589794	1.71621
		210	-0.184547	-0.456305	0.399901	0.679464	-0.141356	-0.180397	-0.722768	-0.531751	10.9443	0.695605	-0.983315	0.251553	2.04036			585	-0.711211	0.625388	-1.41021	-0.124234	-0.141356	-0.180397	-0.722768	1.87885	-0.0912874	-1.43628	-1.03987	0.143143	-0.826567
		213	-0.19182	-0.316264	-1.41021	-1.00867	-0.141356	-0.180397	1.96412	-0.531751	-0.0912874	0.695605	-0.1471	-0.126156	-0.819051			589	-0.598702	0.208888	-0.362564	0.589067	-0.141356	-0.180397	-0.722768	-0.531751	-0.0912874	0.695605	0.89092	0.374669	-0.188837
		214	-0.335468	-0.0727155	-0.476882	-0.0505928	-0.141356	-0.180397	1.74133	-0.531751	-0.0912874	0.695605	-0.0434822	-0.533739	1.03387			590	-0.406009	0.720036	-0.605263	0.404216	-0.141356	-0.180397	1.89827	-0.531751	-0.0912874	0.695605	0.394235	-0.607027	1.36463
		215	0.208514	-0.68696	1.11472	-0.317551	-0.141356	-0.180397	-0.722768	-0.531751	-0.0912874	-1.43628	0.0812533	-0.935006	-0.841633			591	-0.856178	0.646514	0.0362793	-1.00867	-0.141356	-0.180397	2.00146	-0.531751	-0.0912874	0.695605	-1.97859	0.698613	-0.779728
		220	-0.568259	-0.557713	-1.06983	-0.269339	-0.141356	-0.180397	-0.722768	-0.531751	-0.0912874	0.695605	-1.05644	0.394774	-0.718732			592	-0.915614	0.930438	0.72616	-0.0476442	-0.141356	-0.180397	-0.722768	1.87885	-0.0912874	0.695605	-0.437061	0.45476	-0.759297
		221	0.208514	1.90791	-1.41021	1.62973	-0.141356	-0.180397	0.512938	1.87885	-0.0912874	0.695605	1.88077	0.799202	1.89223			595	0.0700071	0.420791	0.931445	-0.41952	-0.141356	-0.180397	-0.722768	-0.531751	-0.0912874	0.695605	-0.136265	-0.299014	0.788414
		222	-0.471736	1.57688	-0.0535237	0.418509	-0.141356	-0.180397	1.59707	-0.531751	-0.0912874	0.695605	0.434682	0.0264781	1.64823			600	-0.554412	0.124604	-1.41021	0.811167	-0.141356	-0.180397	1.49683	1.87885	-0.0912874	0.695605	0.701627	0.796195	-0.59936
		223	1.19005	-0.634538	0.916495	0.170927	-0.141356	-0.180397	-0.722768	-0.531751	-0.0912874	-1.43628	0.898762	-1.12124	-0.418974			601	-0.603997	0.625388	0.563587	-0.584832	-0.141356	-0.180397	-0.722768	-0.531751	-0.0912874	0.695605	-0.305378	-0.250223	-0.560319
		225	1.51248	-0.946447	2.4441	-1.00867	-0.141356	-0.180397	-0.722768	-0.531751	-0.0912874	0.695605	0.116115	-0.730737	-0.590661			602	-0.397598	-1.19152	-0.143796	-0.547747	-0.141356	-0.180397	-0.722768	-0.531751	-0.0912874	-1.43628	-0.956313	-0.658951	-0.841633
		226	-0.454374	-1.63265	-0.442775	-0.214499	-0.141356	-0.180397	-0.722768	-0.531751	-0.0912874	-1.43628	-1.47205	-0.400988	-0.841633			607	-0.00486173	0.306138	1.57029	-1.00867	-0.141356	-0.180397	-0.722768	-0.531751	-0.0912874	-1.43628	-0.541416	-0.641677	-0.772934
		227	0.22274	-0.272502	-1.41021	-0.231161	-0.141356	-0.180397	1.20964	-0.531751	-0.0912874	0.695605	0.82571	-0.501757	0.198392			613	-0.278118	-0.0727155	1.58096	-0.497642	-0.141356	-0.180397	-0.722768	-0.531751	-0.0912874	0.695605	-1.01558	-0.464637	-0.710626
		228	0.343653	1.56553	-0.68924	1.51735	-0.141356	-0.180397	0.402238	-0.531751	-0.0912874	0.695605	1.46684	0.386004	2.04036			638	-0.94498	0.590816	0.294833	-1.00867	-0.141356	-0.180397	2.04042	-0.531751	-0.0912874	0.695605	-2.11111	0.149419	-0.837477
		229	-0.785209	0.243898	1.00144	0.113631	-0.141356	2.98528	-0.722768	1.87885	-0.0912874	0.695605	-1.52023	0.1033	-0.829178			639	-0.682159	-0.519549	-0.14334	-1.00867	-0.141356	-0.180397	1.80465	-0.531751	-0.0912874	0.695605	-2.29759	-0.264139	-0.841633
		230	0.679818	-1.36657	1.02081	-1.00867	-0.141356	-0.180397	-0.722768	-0.531751	-0.0912874	-1.43628	0.0194023	-0.822424	-0.578115			642	0.520372	-2.06677	-0.638002	-0.304098	-0.141356	-0.180397	-0.722768	-0.531751	-0.0912874	-1.43628	-0.162515	-1.2488	-0.826484
		231	1.19005	-1.08012	-1.41021	1.85858	-0.141356	-0.180397	-0.722768	-0.531751	-0.0912874	0.695605	1.30473	-1.28591	1.97752			644	-1.34202	-0.398641	-0.181643	-0.580846	-0.141356	-0.180397	-0.722768	-0.531751	-0.0912874	0.695605	-3.88755	3.05217	-0.825863
		232	-0.711211	-0.292924	-0.660224	-0.136946	-0.141356	-0.180397	1.09403	-0.531751	-0.0912874	0.695605	-0.242578	-0.466142	-0.743023			652	-1.60031	0.181248	-0.98827	1.53594	-0.141356	-0.180397	-0.722768	-0.531751	-0.0912874	0.695605	0.602003	6.3816	-0.800261
		234	-0.41717	0.976418	-0.181711	-0.050073	-0.141356	-0.180397	1.43953	-0.531751	-0.0912874	0.695605	0.0394941	0.169219	1.64823			671	-0.204382	0.0338371	-0.426388	0.0975688	-0.141356	-0.180397	1.25759	1.87885	-0.0912874	0.695605	0.246555	0.282737	-0.718732
		236	-0.50646	0.599385	2.65872	0.337865	-0.141356	-0.180397	-0.722768	1.87885	-0.0912874	0.695605	-1.15754	0.157104	-0.654243			678	0.679818	-0.666366	0.873754	-1.00867	-0.141356	-0.180397	-0.722768	1.87885	-0.0912874	0.695605	-0.0154883	-0.0974787	0.34722
		237	-0.19182	0.383938	0.512812	-1.00867	-0.141356	-0.180397	0.364461	1.87885	-0.0912874	0.695605	-0.0463184	0.407719	-0.634813			687	0.0899721	-0.238464	-0.137068	0.273824	-0.141356	-0.180397	-0.722768	-0.531751	-0.0912874	0.695605	0.733985	0.00564599	0.557364
		238	0.839264	-1.01647	0.953151	-1.00867	-0.141356	-0.180397	-0.722768	-0.531751	-0.0912874	-1.43628	-0.420185	-1.61643	-0.738154			690	-0.532521	0.963417	0.865722	-0.535987	-0.141356	-0.180397	0.884453	-0.531751	-0.0912874	0.695605	-0.401119	0.187328	-0.349324
		239	-1.27018	0.805978	-0.589807	-0.335028	-0.141356	-0.180397	1.92389	1.87885	-0.0912874	0.695605	-1.84264	3.06115	0.37524			697	-0.92453	1.11671	-0.587474	-0.194454	-0.141356	-0.180397	1.65982	-0.531751	-0.0912874	0.695605	-1.39178	1.48048	-0.802114
		244	-0.292456	1.46342	-0.977792	-0.44575	4.66476	-0.180397	0.695633	1.87885	-0.0912874	0.695605	1.17811	1.42655	1.87063			700	-0.560317	-0.141214	0.227144	0.827376	-0.141356	-0.180397	-0.722768	1.87885	-0.0912874	0.695605	0.0850716	0.0817427	0.217128
		245	-0.204382	-0.411746	-0.884455	-1.00867	-0.141356	-0.180397	1.66913	-0.531751	-0.0912874	0.695605	-0.412445	0.8184	-0.638771			702	-0.754911	0.898793	-0.539586	-0.631104	-0.141356	-0.180397	1.68539	1.87885	-0.0912874	0.695605	-0.246533	-0.147507	-0.638771
		250	1.91552	-0.783066	2.90998	-1.00867	-0.141356	-0.180397	-0.722768	-0.531751	-0.0912874	-1.43628	-0.296013	-1.27706	-0.841631			703	0.0899721	-0.510765	2.50611	0.505607	-0.141356	-0.180397	-0.722768	-0.531751	-0.0912874	-1.43628	-0.229548	-0.618937	-0.834986
		252	0.706392	-1.28578	-0.315939	-0.148882	-0.141356	-0.180397	-0.722768	-0.531751	-0.0912874	-1.43628	0.334154	-0.783807	-0.551895			709	-0.406009	0.523979	1.25433	-1.00867	-0.141356	-0.180397	-0.722768	-0.531751	-0.0912874	0.695605	-1.51767	0.215582	-0.521641
		254	0.706392	-0.154679	1.73837	-1.00867	-0.141356	-0.180397	-0.722768	-0.531751	-0.0912874	0.695605	0.454655	-0.619615	-0.46042			719	-0.260913	-0.783066	-0.680532	-1.00867	-0.141356	-0.180397	1.11339	-0.531751	-0.0912874	0.695605	-0.403602	-0.41387	-0.841633
		255	1.19005	-0.634538	0.916495	0.170927	-0.141356	-0.180397	-0.722768	-0.531751	-0.0912874	-1.43628	1.05282	-0.864999	0.31901			721	0.520372	-1.36657	-0.112388	-1.00867	-0.141356	-0.180397	1.64722	-0.531751	-0.0912874	0.695605	0.279438	-0.481895	-0.333472
		256	0.315203	1.61959	0.509878	0.257648	-0.141356	-0.180397	-0.722768	-0.531751	-0.0912874	0.695605	0.460593	-0.0418569	-0.30414			722	0.22274	0.646514	-0.0967211	-0.228313	-0.141356	-0.180397	1.25522	-0.531751	-0.0912874	0.695605	0.78151	-0.688168	1.7948
		257	-1.0991	0.128095	1.25871	1.17171	-0.141356	-0.180397	-0.722768	-0.531751	-0.0912874	-1.43628	-0.823692	1.11985	-0.521641			724	-0.260913	-1.24987	-0.65089	0.0947803	-0.141356	-0.180397	-0.722768	-0.531751	-0.0912874	-1.43628	0.320259	-0.495342	-0.293193
		259	-1.37047	-0.0801494	-1.34289	-0.432178	-0.141356	-0.180397	0.659049	-0.531751	-0.0912874	0.695605	-2.63265	2.59224	-0.751152			725	0.343653	2.17821	-1.41021	2.20617	-0.141356	-0.180397	0.506016	-0.531751	-0.0912874	0.695605	1.80253	0.373429	2.04036
		260	-0.278118	0.14039	-0.411981	-0.0224933	-0.141356	-0.180397	1.8497	1.87885	-0.0912874	0.695605	0.393722	0.032773	1.36463			726	-1.0991	-0.154679	0.97788	-0.275722	4.66476	-0.180397	1.41446	1.87885	-0.0912874	0.695605	-1.60124	0.68245	-0.779319
		265	0.101826	0.466315	0.39371	-1.00867	-0.141356	-0.180397	-0.722768	1.87885	-0.0912874	-1.43628	0.220775	-0.255927	-0.841633			732	-0.68801	0.0338371	-0.876822	0.59291	-0.141356	-0.180397	-0.722768	-0.531751	-0.0912874	-1.43628	-0.0160251	1.0018	-0.462013
		267	-1.05533	0.222353	1.27848	0.168732	-0.141356	-0.180397	-0.722768	-0.531751	-0.0912874	0.695605	-3.27633	2.41512	-0.296839			742	-0.292456	0.85074	0.344707	0.757371	-0.141356	-0.180397	-0.722768	-0.531751	-0.0912874	0.695605	0.253799	-0.479879	0.37524
		270	0.892413	-0.908743	0.72807	-0.293598	-0.141356	-0.180397	-0.722768	-0.531751	-0.0912874	-1.43628	-0.0132159	-1.85956	-0.825552			745	-0.335468	-0.285821	-0.0261986	0.106841	-0.141356	-0.180397	-0.722768	-0.531751	-0.0912874	-1.43628	0.0787074	-0.499902	-0.759297
		271	-0.551105	-1.09726	-0.871581	-0.129728	-0.141356	-0.180397	1.93828	1.87885	-0.0912874	0.695605	-0.0616429	-0.236853	1.11257			748	-0.41717	-0.154679	-0.0814211	-0.0829079	-0.141356	-0.180397	-0.722768	1.87885	-0.0912874	-1.43628	-0.702088	0.681598	-0.796146
		272	0.679818	-1.01647	0.726833	0.319319	-0.141356	-0.180397	-0.722768	-0.531751	-0.0912874	0.695605	0.100155	-1.48365	-0.841625			757	-0.598702	-0.316264	0.258486	-0.526892	-0.141356	-0.180397	-0.722768	1.87885	-0.0912874	-1.43628	0.0220257	0.165209	-0.837062
		273	-0.335468	0.99281	0.764384	-0.294354	-0.141356	-0.180397	-0.0223957	1.87885	-0.0912874	0.695605	-0.312777	0.110345	2.02641			771	0.22274	1.25919	-1.41021	0.470716	-0.141356	9.31662	-0.722768	-0.531751	-0.0912874	0.695605	0.617493	-0.199285	-0.654243
		274	-0.14157	1.37059	0.12477	-0.495801	-0.141356	-0.180397	1.33654	-0.531751	-0.0912874	0.695605	0.231486	0.00704285	-0.153451			801	-0.6445	0.85074	-0.398395	1.70264	-0.141356	-0.180397	0.654585	1.87885	-0.0912874	0.695605	0.855348	0.652572	1.60229
		276	1.51248	-0.946447	0.345059	0.160363	-0.141356	-0.180397	-0.722768	-0.531751	-0.0912874	-1.43628	1.12088	-1.46875	0.235459			805	-0.933308	0.452251	0.313025	-1.00867	-0.141356	-0.180397	1.6694	-0.531751	-0.0912874	0.695605	-2.45776	0.0279543	-0.829178
		279	-1.21969	0.728814	-0.669768	-0.135089	-0.141356	-0.180397	1.84327	-0.531751	-0.0912874	0.695605	-2.17995	3.63428	-0.445349			811	-0.568259	-0.557713	-0.818256	-1.00867	-0.141356	-0.180397	-0.722768	-0.531751	-0.0912874	-1.43628	-0.786129	0.569766	-0.746273
		280	0.343653	0.646514	-0.205853	-0.225465	-0.141356	-0.180397	0.701735	-0.531751	-0.0912874	0.695605	1.17856	0.030221	2.02912			813	-0.00486173	0.85074	-0.0285558	-1.00867	-0.141356	-0.180397	-0.722768	1.87885	-0.0912874	0.695605	-0.599771	0.0686481	-0.808783
		282	-0.19182	0.617339	0.861166	-0.343717	-0.141356	2.98528	-0.722768	1.87885	-0.0912874	0.695605	-0.30636	-0.190915	-0.70503			819	-0.0148443	-0.611086	1.51979	0.294912	-0.141356	-0.180397	-0.722768	-0.531751	-0.0912874	-1.43628	-0.831947	-0.182118	-0.841633
		287	1.19005	-3.39716	-1.41021	-1.00867	-0.141356	-0.180397	-0.722768	-0.531751	-0.0912874	-1.43628	0.08266	-1.80129	-0.57211			823	0.360926	-1.01647	-1.41021	-1.00867	-0.141356	-0.180397	-0.722768	1.87885	-0.0912874	-1.43628	0.485805	0.205999	-0.841626
		289	-0.532521	0.794402	-0.642074	-1.00867	-0.141356	-0.180397	2.12964	-0.531751	-0.0912874	0.695605	-0.458157	0.661796	0.12918			825	0.464566	0.952853	1.77924	-1.00867	-0.141356	-0.180397	-0.722768	-0.531751	-0.0912874	-1.43628	0.383187	-0.557225	-0.48332
		290	-0.0318145	0.278908	2.40347	-1.00867	-0.141356	-0.180397	-0.722768	-0.531751	-0.0912874	0.695605	-1.11084	-0.601254	-0.841633			827	1.51248	-1.92673	-0.322063	0.695583	-0.141356	-0.180397	-0.722768	-0.531751	-0.0912874	0.695605	0.826502	-0.714713	0.338464
		291	-1.43877	0.208888	-0.617226	0.704543	-0.141356	-0.180397	0.771305	-0.531751	-0.0912874	0.695605	-1.60124	3.21126	-0.153451			829	-0.330006	-1.97129	-0.463256	-0.534075	-0.141356	-0.180397	-0.722768	-0.531751	-0.0912874	-1.43628	-0.810839	-0.6886	-0.816884
		293	-0.521932	-0.141214	-0.837006	0.746173	-0.141356	-0.180397	-0.722768	-0.531751	-0.0912874	-1.43628	0.539646	0.80275	1.44889			833	-0.204382	0.0338371	-0.0872778	-1.00867	-0.141356	-0.180397	1.93318	-0.531751	-0.0912874	0.695605	-0.833007	-0.659739	-0.722771
		295	-0.278118	-0.0727155	-0.625349	-0.509671	-0.141356	-0.180397	-0.722768	-0.531751	-0.0912874	0.695605	-0.572021	0.372124	-0.787108			836	-0.0148443	0.93673	-0.770072	0.466874	4.66476	-0.180397	0.608176	-0.531751	-0.0912874	0.695605	1.36715	0.422487	1.85762
		296	-0.568259	-0.388699	0.797601	-0.196957	-0.141356	-0.180397	-0.722768	1.87885	-0.0912874	-1.43628	-1.20201	0.132266	-0.734505			837	1.19005	0.0338371	-1.41021	0.420931	-0.141356	-0.180397	-0.722768	1.87885	-0.0912874	-1.43628	1.56722	0.493139	1.75736
		297	-0.682159	1.694	0.504384	-0.537001	-0.141356	6.15095	-0.722768	-0.531751	-0.0912874	0.695605	-0.375489	0.0660797	-0.797792			838	0.343653	1.25919	-0.150151	0.648243	-0.141356	-0.180397	0.664718	-0.531751	-0.0912874	0.695605	1.48038	-0.0165193	2.04036
		298	-0.68801	-0.425671	-0.47057	-1.00867	-0.141356	-0.180397	1.87074	-0.531751	-0.0912874	0.695605	-1.59219	-0.145678	-0.841633			841	0.27964	0.85074	0.18494	-1.00867	-0.141356	-0.180397	-0.722768	-0.531751	-0.0912874	-1.43628	-1.24845	2.21521	-0.786288
		299	-0.767597	0.578439	-0.26252	-0.70276	-0.141356	-0.180397	2.0969	-0.531751	-0.0912874	0.695605	-1.29296	0.150835	-0.829178			844	-0.122727	-0.783066	0.825427	-0.50732	-0.141356	-0.180397	-0.722768	-0.531751	-0.0912874	0.695605	-1.06588	-0.543331	-0.841633
		300	0.0445517	0.278908	-0.751355	-1.00867	-0.141356	-0.180397	2.12274	-0.531751	-0.0912874	0.695605	-0.356993	0.677545	0.703268			847	-0.560317	-0.316264	-0.527869	-1.00867	-0.141356	-0.180397	1.73759	-0.531751	-0.0912874	0.695605	-0.432799	-0.253077	-0.0835696
		301	-1.22357	0.373166	-0.537124	-0.284617	-0.141356	-0.180397	1.93921	-0.531751	-0.0912874	0.695605	-2.65248	1.74978	-0.837477			852	1.83492	1.9944	0.152589	1.45733	-0.141356	-0.180397	-0.722768	-0.531751	-0.0912874	-1.43628	1.62536	0.84767	1.97752
		302	0.208514	-0.398641	-0.239602	0.864185	-0.141356	-0.180397	-0.722768	-0.531751	-0.0912874	0.695605	0.735793	-0.191195	1.01529			868	0.520372	0.383938	0.54588	-0.0637948	-0.141356	-0.180397	0.829832	-0.531751	-0.0912874	0.695605	0.0860536	-0.998583	-0.219154
		303	-0.19182	-1.01647	0.491712	0.57754	-0.141356	-0.180397	-0.722768	-0.531751	-0.0912874	-1.43628	-0.0729913	-0.540124	-0.213788			870	-1.19011	0.191947	-0.0955705	-0.192361	-0.141356	-0.180397	-0.722768	-0.531751	-0.0912874	0.695605	-1.44045	2.28682	-0.370431
		305	-0.990994	-0.188955	-0.858147	0.288419	-0.141356	-0.180397	-0.722768	1.87885	-0.0912874	0.695605	-0.407664	1.0626	-0.615828			884	-0.775769	0.587223	-1.41021	-0.186262	-0.141356	-0.180397	-0.722768	-0.531751	-0.0912874	-1.43628	-1.40433	0.0518429	-0.829841
		307	-0.260913	-1.19152	-1.41021	-1.00867	-0.141356	-0.180397	-0.722768	-0.531751	-0.0912874	-1.43628	-1.90292	1.68301	-0.812505			885	-0.260913	-0.549665	-0.373798	-0.371503	-0.141356	-0.180397	-0.722768	-0.531751	-0.0912874	0.695605	-0.45057	-0.256278	-0.841633
		308	-0.00486173	-0.975279	-1.41021	-1.00867	-0.141356	-0.180397	-0.722768	-0.531751	-0.0912874	-1.43628	0.277839	-0.737397	-0.699361			895	-0.357644	-0.0641913	1.72857	-0.037762	-0.141356	-0.180397	-0.722768	1.87885	-0.0912874	-1.43628	-0.474216	-0.142299	-0.49172
		314	-0.619752	0.271003	0.186451	-1.00867	-0.141356	-0.180397	2.02212	-0.531751	-0.0912874	0.695605	-1.14725	0.0407806	-0.832852			896	-0.278118	0.779705	0.997014	0.163425	-0.141356	-0.180397	0.0822123	1.87885	-0.0912874	0.695605	0.474116	-0.215542	-0.698597
		315	-0.68801	0.493345	0.271024	1.65298	-0.141356	-0.180397	0.763884	-0.531751	-0.0912874	0.695605	0.745364	0.843549	1.0865			901	-0.19182	0.150538	2.16315	0.304656	-0.141356	-0.180397	-0.722768	-0.531751	-0.0912874	0.695605	-0.480159	-0.903752	-0.715504
		316	-0.00486173	0.0338371	-1.41021	1.1739	-0.141356	-0.180397	0.523472	-0.531751	-0.0912874	0.695605	1.4621	-0.390701	2.04036			908	-0.122727	-0.549665	-0.627445	-0.527441	-0.141356	-0.180397	2.14617	-0.531751	-0.0912874	0.695605	-0.523247	0.678953	0.527558
		317	1.51248	1.01412	-1.41021	-1.00867	-0.141356	-0.180397	0.330562	-0.531751	-0.0912874	-1.43628	1.49113	-0.724987	1.80515			910	-0.554412	-0.601532	0.171039	-0.094511	-0.141356	-0.180397	-0.722768	-0.531751	-0.0912874	-1.43628	0.0983939	-0.479153	-0.638375
		318	0.360926	-2.09011	-0.919687	-1.00867	-0.141356	-0.180397	-0.722768	-0.531751	-0.0912874	-1.43628	0.00776499	-0.575507	-0.81538			914	-0.184547	0.0338371	-0.47588	0.722047	-0.141356	-0.180397	1.69287	-0.531751	-0.0912874	0.695605	0.565894	-0.957216	1.11257
		319	0.0899721	0.0338371	0.58481	1.01405	-0.141356	-0.180397	-0.722768	1.87885	-0.0912874	0.695605	0.625043	-0.604529	-0.525493			917	-0.184547	-0.946447	-0.801393	-0.479318	-0.141356	-0.180397	1.7181	-0.531751	-0.0912874	0.695605	-0.102745	-0.121872	-0.59936
		321	-0.220768	-0.712031	-1.41021	-0.556784	-0.141356	-0.180397	-0.722768	-0.531751	-0.0912874	-1.43628	-0.712067	0.243072	-0.800261			920	0.208514	1.61959	-1.41021	2.79214	-0.141356	-0.180397	-0.722768	-0.531751	-0.0912874	0.695605	2.26899	0.424013	2.04036
		323	0.360926	-2.09011	-0.708648	-0.353436	-0.141356	-0.180397	-0.722768	-0.531751	-0.0912874	-1.43628	-0.306151	-0.436615	-0.761213			930	-0.00486173	0.466315	-1.41021	0.464342	-0.141356	-0.180397	-0.722768	1.87885	-0.0912874	-1.43628	0.342112	-0.080688	-0.762029
		326	-0.14157	0.702212	0.00537658	-0.514173	-0.141356	-0.180397	-0.722768	-0.531751	-0.0912874	0.695605	-0.193314	0.604385	-0.775634			942	0.0899721	-0.238464	3.57996	-1.00867	-0.141356	-0.180397	-0.722768	-0.531751	-0.0912874	-1.43628	-2.1681	-0.518133	-0.841633
		327	-0.14157	0.702212	0.00537658	-0.514173	-0.141356	-0.180397	-0.722768	-0.531751	-0.0912874	0.695605	-0.193314	0.604385	-0.715101			949	-0.461815	-0.531711	0.0356818	-1.00867	-0.141356	-0.180397	-0.722768	-0.531751	-0.0912874	0.695605	-0.775364	-0.140178	-0.822633
		328	-0.933308	-0.743217	-0.920891	-0.361749	-0.141356	-0.180397	-0.722768	1.87885	-0.0912874	-1.43628	-2.43738	1.06007	-0.830671			951	-0.650956	0.429113	-0.00711802	-1.00867	-0.141356	-0.180397	1.97858	-0.531751	-0.0912874	0.695605	-1.03065	-0.272744	-0.638771
		330	-0.50646	0.787902	0.867269	-1.00867	-0.141356	-0.180397	-0.722768	-0.531751	-0.0912874	0.695605	-0.7568	0.0664889	0.660032			958	-0.461815	-0.343195	0.403612	0.556541	-0.141356	-0.180397	-0.722768	-0.531751	-0.0912874	0.695605	-0.0316198	0.156972	-0.445349
		331	-0.611144	0.68736	-0.0593173	-0.606227	-0.141356	-0.180397	1.97438	-0.531751	-0.0912874	0.695605	-1.02868	-0.561623	-0.800261			969	-0.775769	0.429113	-1.41021	-0.222853	-0.141356	-0.180397	-0.722768	1.87885	-0.0912874	0.695605	-1.101	0.139261	-0.841633
		332	-0.406009	-0.456305	0.108539	-1.00867	-0.141356	-0.180397	1.58723	-0.531751	-0.0912874	0.695605	-1.05651	-0.226315	-0.841633			983	-0.372525	0.787902	-0.324393	-1.00867	-0.141356	-0.180397	2.1547	-0.531751	-0.0912874	0.695605	-0.610653	0.34607	-0.759297
		336	0.22274	-1.10983	-1.41021	-1.00867	-0.141356	-0.180397	-0.722768	1.87885	-0.0912874	-1.43628	0.1575	0.300015	-0.716311			1005	-0.682159	0.587223	1.66844	-0.523168	-0.141356	-0.180397	1.01623	-0.531751	-0.0912874	0.695605	-0.984537	-0.116714	-0.783007
		338	-0.330006	-0.188955	0.417097	0.209073	-0.141356	-0.180397	0.816099	-0.531751	-0.0912874	0.695605	0.535765	-0.791618	-0.759297			1008	0.0154598	1.08414	-0.415112	-0.45031	-0.141356	-0.180397	1.93696	-0.531751	-0.0912874	0.695605	0.282771	1.24954	1.73862
		340	-0.882752	0.80406	-1.41021	0.955647	-0.141356	-0.180397	0.884839	-0.531751	-0.0912874	0.695605	2.63911	-0.654505	2.04036			1011	-0.461815	0.410869	-0.205552	0.476952	-0.141356	-0.180397	0.627469	1.87885	-0.0912874	0.695605	0.607718	0.442202	0.899296
		343	-0.330006	-1.08012	-0.655022	-1.00867	-0.141356	-0.180397	-0.722768	-0.531751	-0.0912874	-1.43628	-0.22161	-0.81314	-0.450644			1012	0.520372	-0.666366	0.308051	0.789649	-0.141356	-0.180397	-0.722768	-0.531751	-0.0912874	-1.43628	0.619255	-0.637756	-0.704627
		344	0.184806	1.12304	2.55254	-0.209417	-0.141356	-0.180397	-0.722768	-0.531751	-0.0912874	0.695605	0.028418	0.329285	-0.826762			1015	-0.915614	0.691344	-0.503483	-1.00867	-0.141356	-0.180397	1.94569	-0.531751	-0.0912874	0.695605	-1.52623	0.0925377	-0.789161
		346	0.0899721	-0.510765	1.83976	1.58136	-0.141356	-0.180397	-0.722768	-0.531751	-0.0912874	-1.43628	0.450606	-0.506687	-0.696991			1018	0.0700071	-0.0951476	1.88209	0.233893	-0.141356	-0.180397	-0.722768	-0.531751	-0.0912874	-1.43628	0.0123924	-0.471527	-0.830712
		347	0.343653	-0.885179	1.49483	0.395402	-0.141356	-0.180397	-0.722768	-0.531751	-0.0912874	-1.43628	0.174757	-0.655356	-0.794913			1020	0.637299	-0.783066	1.26099	-0.353436	-0.141356	-0.180397	-0.722768	-0.531751	-0.0912874	-1.43628	-0.283202	-1.23542	-0.819096
		348	0.208514	-0.68696	1.11472	-0.317551	-0.141356	-0.180397	-0.722768	-0.531751	-0.0912874	-1.43628	0.0829155	-0.56002	-0.802237			1023	0.0700071	-0.0951476	1.88209	0.233893	-0.141356	-0.180397	-0.722768	-0.531751	-0.0912874	-1.43628	0.155013	-0.112901	-0.617837
		351	-0.6445	0.523979	1.1202	-1.00867	-0.141356	-0.180397	-0.722768	-0.531751	-0.0912874	0.695605	-0.513565	-0.102799	-0.648167			1025	0.926234	-2.41687	-0.677084	-1.00867	-0.141356	-0.180397	-0.722768	-0.531751	-0.0912874	-1.43628	-0.125759	-0.684826	-0.672846
		352	-0.6445	-1.27321	-1.01176	-0.00161118	-0.141356	-0.180397	-0.722768	-0.531751	-0.0912874	-1.43628	-1.13749	0.596833	-0.834986			1029	-0.454374	-0.652362	0.290313	-1.00867	-0.141356	-0.180397	-0.722768	-0.531751	-0.0912874	-1.43628	-0.818161	-0.282742	-0.807884
		353	0.520372	-1.28578	-1.41021	-1.00867	-0.141356	-0.180397	-0.722768	1.87885	-0.0912874	-1.43628	0.358946	0.306066	-0.470143			1030	-0.521932	-0.316264	-0.8995	0.288338	-0.141356	-0.180397	-0.722768	-0.531751	-0.0912874	-1.43628	0.0638288	0.768595	0.312715
		355	-0.809595	0.523979	0.266406	1.27473	-0.141356	2.98528	-0.722768	-0.531751	-0.0912874	0.695605	0.140314	0.680109	0.344095			1033	-0.568259	0.456373	0.580833	-0.595517	-0.141356	-0.180397	-0.722768	-0.531751	-0.0912874	0.695605	-0.578323	-0.323923	-0.824662
		356	-0.809595	0.523979	0.266406	1.27473	-0.141356	2.98528	-0.722768	-0.531751	-0.0912874	0.695605	0.140314	0.680109	0.344095			1035	0.520372	1.08414	-1.41021	-0.00108419	-0.141356	-0.180397	1.11966	-0.531751	-0.0912874	-1.43628	0.678664	0.139829	1.76092
		358	1.07843	-0.154679	1.43025	-1.00867	-0.141356	-0.180397	-0.722768	-0.531751	-0.0912874	-1.43628	-0.0865613	-1.26942	-0.841633			1038	-0.41717	-0.343195	-0.910457	0.307431	-0.141356	-0.180397	-0.722768	-0.531751	-0.0912874	-1.43628	0.328098	0.55305	0.0861616
		359	-0.330006	0.925004	-1.41021	2.64438	-0.141356	-0.180397	-0.722768	-0.531751	-0.0912874	0.695605	1.62719	0.951438	1.38902			1043	0.0700071	0.93673	0.453299	-0.307398	-0.141356	-0.180397	0.307388	-0.531751	-0.0912874	0.695605	1.00038	-0.523042	0.557364
		361	-1.17762	0.241524	-0.437798	0.242099	-0.141356	-0.180397	1.58537	-0.531751	-0.0912874	0.695605	-1.71284	3.18785	-0.664829			1047	3.12466	-0.316264	0.381135	1.64731	-0.141356	-0.180397	-0.722768	-0.531751	-0.0912874	-1.43628	1.47542	-1.25956	2.04036
		362	-0.50646	0.0338371	0.913367	-1.00867	-0.141356	-0.180397	1.52814	-0.531751	-0.0912874	0.695605	-1.20077	-0.555466	-0.835608			1050	-0.0318145	-0.211234	-0.130151	-0.52174	-0.141356	-0.180397	1.98043	-0.531751	-0.0912874	0.695605	-0.276878	-0.762901	-0.153451
		364	0.343653	0.340176	1.97042	-1.00867	-0.141356	-0.180397	0.207673	1.87885	-0.0912874	-1.43628	-0.406686	-0.0296429	-0.84162			1053	-0.0148443	-0.611086	-0.0997492	0.101871	-0.141356	-0.180397	-0.722768	-0.531751	-0.0912874	0.695605	0.341496	-0.745434	-0.224527
		366	-0.0996956	-0.0951476	0.734615	-0.149845	-0.141356	-0.180397	-0.722768	-0.531751	-0.0912874	-1.43628	-0.139662	-0.679272	-0.688246			1061	0.706392	-0.531711	0.994748	0.0469115	-0.141356	-0.180397	-0.722768	-0.531751	-0.0912874	-1.43628	0.926817	-0.79365	0.931992
		367	0.184806	1.39534	0.6327	1.33096	-0.141356	-0.180397	-0.722768	-0.531751	-0.0912874	0.695605	0.991757	0.482318	1.73862			1066	0.0899721	0.0338371	-0.996218	0.321164	-0.141356	-0.180397	-0.722768	-0.531751	-0.0912874	0.695605	0.610703	-0.928308	1.16422
		368	-1.28749	0.762426	-0.357877	-1.00867	9.47088	-0.180397	-0.722768	-0.531751	-0.0912874	0.695605	-0.689906	1.6219	0.926561			1068	0.101826	-0.398641	-0.545323	0.788998	-0.141356	-0.180397	1.73349	-0.531751	-0.0912874	0.695605	0.937041	-1.06792	1.69367
		369	-0.220768	0.779705	1.06536	-1.00867	-0.141356	-0.180397	-0.722768	-0.531751	-0.0912874	0.695605	-0.605261	0.695187	-0.609178			1074	-0.461815	-0.154679	1.64473	-0.0552415	-0.141356	-0.180397	-0.722768	1.87885	-0.0912874	0.695605	-0.680757	-1.04998	-0.841633
		370	-0.267194	-0.634538	0.300931	1.39095	-0.141356	-0.180397	-0.722768	-0.531751	-0.0912874	0.695605	0.402498	-0.137737	0.926561			1078	0.464566	1.56553	0.12025	0.500688	-0.141356	-0.180397	-0.722768	1.87885	-0.0912874	0.695605	0.419954	-0.212928	1.36463
		372	-0.650956	0.429113	-0.4404	-1.00867	-0.141356	-0.180397	1.96312	-0.531751	-0.0912874	0.695605	-0.864208	-0.752851	-0.796146			1087	-1.01726	0.85074	-0.00123569	-1.00867	9.47088	-0.180397	-0.722768	-0.531751	-0.0912874	0.695605	-1.19748	2.60239	1.24051
		374	-0.108181	-0.456305	1.61743	0.283605	-0.141356	-0.180397	-0.722768	-0.531751	-0.0912874	0.695605	-0.0226065	-0.226662	-0.786698			1089	-0.122727	0.150538	-0.577946	-0.45031	-0.141356	-0.180397	1.90095	-0.531751	-0.0912874	0.695605	0.475285	0.649002	1.13847
		375	-0.933308	-0.384577	0.388326	0.107225	-0.141356	-0.180397	-0.722768	-0.531751	-0.0912874	0.695605	-1.49671	0.407243	-0.759297			1093	0.499113	0.197218	1.25289	0.564954	-0.141356	-0.180397	-0.722768	1.87885	-0.0912874	0.695605	0.719127	-0.854454	-0.725317
		377	0.499113	1.50426	-0.672552	1.51328	-0.141356	-0.180397	0.765888	-0.531751	-0.0912874	0.695605	1.49588	0.468533	1.91372			1096	-0.0318145	0.0338371	2.04019	0.784837	-0.141356	-0.180397	-0.722768	-0.531751	-0.0912874	-1.43628	0.146651	-0.391122	-0.841235
		378	0.499113	-1.43659	0.709794	-1.00867	-0.141356	-0.180397	-0.722768	-0.531751	-0.0912874	-1.43628	-0.160979	-0.227898	-0.764191			1099	1.71767	3.8213	-1.41021	-1.00867	-0.141356	-0.180397	1.97326	1.87885	-0.0912874	-1.43628	1.36583	0.802956	1.82709
		379	-0.750062	-0.337482	-0.402802	-0.321871	-0.141356	-0.180397	1.92271	-0.531751	-0.0912874	0.695605	-0.9601	-0.0101944	-0.779728			1101	0.343653	-0.272502	0.352569	-0.273881	-0.141356	-0.180397	-0.722768	1.87885	-0.0912874	0.695605	0.512663	-0.73834	-0.171106
		380	0.892413	-0.908743	1.12486	-1.00867	-0.141356	-0.180397	-0.722768	1.87885	-0.0912874	-1.43628	0.503969	0.0993282	-0.746273			1102	-0.108181	-0.211234	2.08958	2.57562	-0.141356	-0.180397	-0.722768	-0.531751	-0.0912874	-1.43628	0.713906	-0.704686	-0.841633
		381	1.45386	-1.08012	1.1677	-0.0990306	-0.141356	-0.180397	-0.722768	-0.531751	-0.0912874	-1.43628	0.307804	-1.53088	-0.84163			1109	0.706392	0.442289	-1.41021	0.439917	-0.141356	-0.180397	-0.722768	-0.531751	-0.0912874	-1.43628	0.869494	0.51932	1.35484
		384	0.360926	0.523979	-0.242044	-1.00867	-0.141356	-0.180397	1.30235	-0.531751	-0.0912874	0.695605	0.642246	-0.0893296	1.04233			1110	1.51248	-1.92673	-0.133787	-0.00161118	-0.141356	-0.180397	-0.722768	-0.531751	-0.0912874	-1.43628	0.379693	-0.670597	-0.411468
		392	-0.335468	-1.56445	-0.452572	0.488258	-0.141356	-0.180397	-0.722768	-0.531751	-0.0912874	0.695605	-0.903907	-0.849182	-0.805451			1114	-0.461815	-0.343195	0.149734	-0.540783	-0.141356	-0.180397	1.74754	-0.531751	-0.0912874	0.695605	-0.689428	-0.480284	-0.159092
		394	-0.406009	0.916092	0.522734	-0.432697	-0.141356	-0.180397	-0.722768	-0.531751	-0.0912874	0.695605	-0.107428	0.583388	0.616341			1115	-0.560317	-0.666366	0.473744	-1.00867	-0.141356	-0.180397	-0.722768	-0.531751	-0.0912874	0.695605	-1.61164	0.573889	-0.800261
		395	0.706392	-0.783066	-1.41021	-1.00867	-0.141356	-0.180397	1.32937	1.87885	-0.0912874	-1.43628	0.620962	-0.0535636	-0.841633			1119	0.421891	-0.398641	1.45661	-0.434003	-0.141356	-0.180397	-0.722768	-0.531751	-0.0912874	-1.43628	-0.548849	-1.2152	-0.841598
		398	-0.717263	-0.57884	-0.143334	-0.278153	-0.141356	-0.180397	0.907664	-0.531751	-0.0912874	0.695605	-0.698711	0.411227	-0.678559			1139	0.208514	-0.68696	-0.69601	-0.403624	-0.141356	-0.180397	1.91115	-0.531751	-0.0912874	0.695605	-0.02307	-0.567865	1.43737
		399	0.208514	1.33127	0.0375207	-0.171805	-0.141356	-0.180397	1.21162	-0.531751	-0.0912874	0.695605	0.633444	-0.0731622	1.25535			1142	-0.717263	1.10602	-0.0121033	1.8721	-0.141356	2.98528	-0.722768	-0.531751	-0.0912874	0.695605	0.740933	0.0642007	1.48516
		400	-0.658757	0.0338371	-0.19088	-0.657285	-0.141356	-0.180397	1.38738	-0.531751	-0.0912874	0.695605	-1.1066	0.595556	-0.445349			1150	-0.785209	0.243898	0.295185	-0.182479	-0.141356	-0.180397	-0.722768	-0.531751	-0.0912874	0.695605	-1.51936	0.933906	-0.833325
		401	0.22274	-0.783066	-0.738178	1.64239	-0.141356	-0.180397	-0.722768	-0.531751	-0.0912874	0.695605	1.30575	0.126105	-0.84162			1153	0.926234	-0.783066	-0.535458	-1.00867	-0.141356	-0.180397	-0.722768	1.87885	-0.0912874	-1.43628	1.39338	-0.051838	1.90728
		402	-0.392818	0.5666	-0.950821	3.58561	-0.141356	-0.180397	-0.722768	-0.531751	-0.0912874	0.695605	2.62709	0.385052	1.73862			1156	0.22274	-0.272502	-0.111102	-1.00867	-0.141356	-0.180397	-0.722768	1.87885	-0.0912874	-1.43628	0.00644018	-0.157327	-0.841633
		404	-0.513074	-0.0569299	-0.10184	-0.559419	-0.141356	-0.180397	1.89055	-0.531751	-0.0912874	0.695605	-0.456528	-0.15308	0.871026			1160	0.360926	-0.783066	0.230079	2.65806	-0.141356	-0.180397	-0.722768	-0.531751	-0.0912874	0.695605	1.19224	-0.427032	1.71621
		405	-0.335468	-0.925136	-0.406239	0.367065	-0.141356	-0.180397	-0.722768	1.87885	-0.0912874	0.695605	-0.665492	-0.22222	-0.813538			1172	-0.50646	-0.720227	-0.467168	-0.574992	-0.141356	-0.180397	1.65169	-0.531751	-0.0912874	-1.43628	-0.309184	-0.225233	-0.82752
		407	-0.695101	0.405157	0.943756	-0.288336	-0.141356	-0.180397	-0.722768	-0.531751	-0.0912874	0.695605	-0.983855	0.322425	-0.833325			1173	-0.00486173	0.306138	0.14979	-1.00867	-0.141356	-0.180397	-0.722768	1.87885	-0.0912874	-1.43628	0.15916	-0.602462	-0.678559
		409	-1.2445	-0.456305	-0.686643	1.34113	-0.141356	-0.180397	-0.722768	-0.531751	-0.0912874	0.695605	-0.955961	3.05475	-0.718732			1179	0.27964	-0.783066	1.06408	-1.00867	-0.141356	-0.180397	-0.722768	-0.531751	-0.0912874	-1.43628	-0.99039	-1.43866	-0.795283
		413	-0.750062	0.85074	-1.41021	2.61228	-0.141356	-0.180397	-0.722768	-0.531751	-0.0912874	0.695605	2.08923	1.06135	2.04036			1187	-0.513074	-0.419998	0.912088	-1.00867	-0.141356	-0.180397	-0.722768	-0.531751	-0.0912874	-1.43628	-1.28672	-0.026047	-0.84163
		415	0.360926	-2.09011	-0.708648	-0.353436	-0.141356	-0.180397	-0.722768	-0.531751	-0.0912874	-1.43628	-0.259443	-0.8588	-0.763293			1199	-0.0318145	1.25919	-0.491425	-0.414763	-0.141356	-0.180397	1.86464	-0.531751	-0.0912874	0.695605	0.326923	0.261938	1.21523
		416	-0.345027	0.238063	0.905267	-1.00867	-0.141356	-0.180397	-0.722768	1.87885	-0.0912874	0.695605	-0.313136	0.0976723	-0.773384			1204	-0.0996956	-0.869056	-0.292106	-0.315552	-0.141356	-0.180397	0.830113	1.87885	-0.0912874	0.695605	0.445688	-0.912661	-0.333472
		421	-0.850304	0.0966758	-1.09091	-0.696322	-0.141356	-0.180397	-0.722768	-0.531751	-0.0912874	-1.43628	-1.21568	1.04226	-0.800261			1206	1.19005	0.256629	1.95202	0.347824	-0.141356	-0.180397	-0.722768	-0.531751	-0.0912874	-1.43628	0.549188	-0.576636	0.74322
		422	-0.345027	-0.374614	0.0653822	-0.119797	-0.141356	-0.180397	-0.722768	-0.531751	-0.0912874	0.695605	-0.476609	-0.472154	-0.811473			1221	0.0445517	0.278908	0.397328	0.040643	-0.141356	-0.180397	1.86399	-0.531751	-0.0912874	0.695605	-0.169488	0.0953374	-0.638771
		424	-0.397598	0.442289	0.358255	-1.00867	-0.141356	-0.180397	0.742376	1.87885	-0.0912874	0.695605	-0.447513	-0.22087	-0.305967			1226	0.208514	0.466315	-0.059987	-1.00867	-0.141356	-0.180397	1.31618	-0.531751	-0.0912874	0.695605	0.553236	-0.799208	2.04036
		429	-0.357644	-0.0641913	1.72857	-0.037762	-0.141356	-0.180397	-0.722768	1.87885	-0.0912874	-1.43628	-0.474216	-0.142299	-0.289551			1231	-0.813659	1.66764	-1.21852	0.325468	-0.141356	6.15095	1.70663	-0.531751	-0.0912874	0.695605	0.31467	-0.0430507	-0.80438
		430	-0.0318145	1.01412	-0.210333	-0.455341	-0.141356	-0.180397	1.66775	-0.531751	-0.0912874	0.695605	0.448821	0.167956	1.73862			1233	-0.357644	0.720036	-0.0689099	-1.00867	-0.141356	-0.180397	2.07983	1.87885	-0.0912874	0.695605	-0.8291	-0.642684	-0.830422
		432	-0.554412	1.03227	0.081285	0.0256242	-0.141356	6.15095	-0.722768	1.87885	-0.0912874	0.695605	-0.138822	0.080595	-0.813947			1245	0.208514	0.466315	1.20471	2.19041	-0.141356	-0.180397	-0.722768	1.87885	-0.0912874	0.695605	1.10917	-0.364168	0.165235
		433	0.926234	-1.08012	-1.41021	-1.00867	-0.141356	-0.180397	-0.722768	-0.531751	-0.0912874	-1.43628	0.996548	-0.455296	1.98321			1246	-0.790628	0.306138	0.104914	0.992536	-0.141356	-0.180397	-0.722768	-0.531751	-0.0912874	0.695605	0.151604	0.98403	-0.537069
		434	-0.619752	1.06155	-0.409673	-0.600701	-0.141356	-0.180397	1.84637	-0.531751	-0.0912874	0.695605	-0.454111	0.139271	0.0527652			1253	-0.717263	1.10602	0.0662726	1.62443	-0.141356	-0.180397	-0.722768	-0.531751	-0.0912874	0.695605	0.950675	0.0925494	-0.664192
		435	-0.560317	0.90909	0.154026	-0.031122	-0.141356	2.98528	-0.722768	1.87885	-0.0912874	0.695605	0.480631	-0.0985825	-0.596067			1258	1.91552	-1.32767	0.957419	0.295957	-0.141356	-0.180397	-0.722768	-0.531751	-0.0912874	-1.43628	0.385628	-0.969555	-0.551391
		436	-0.611144	0.68736	0.132208	-0.578144	-0.141356	-0.180397	1.73496	1.87885	-0.0912874	0.695605	-0.768569	-0.209622	-0.829178			1261	-0.461815	-0.154679	-0.19857	-1.00867	-0.141356	-0.180397	1.96883	-0.531751	-0.0912874	0.695605	-0.87725	-0.737584	-0.260525
		437	-0.850304	0.348031	0.515998	-0.729593	-0.141356	-0.180397	-0.722768	-0.531751	-0.0912874	0.695605	-2.33529	0.361559	-0.825035			1266	0.520372	0.73404	0.941897	1.99883	-0.141356	-0.180397	-0.722768	-0.531751	-0.0912874	0.695605	1.35612	-0.373483	1.72967
		438	0.499113	-0.456305	-0.173175	-0.350208	-0.141356	-0.180397	-0.722768	-0.531751	-0.0912874	0.695605	0.159647	0.668824	-0.59936			1267	0.520372	-0.666366	0.519563	2.952	-0.141356	-0.180397	-0.722768	-0.531751	-0.0912874	0.695605	1.65861	-0.752525	1.50885
		439	-0.267194	0.0338371	-0.343567	0.8711	-0.141356	-0.180397	-0.722768	-0.531751	-0.0912874	0.695605	0.317282	0.0692039	-0.759297			1280	-0.803733	1.71064	0.447064	-0.679136	-0.141356	-0.180397	1.31674	-0.531751	-0.0912874	0.695605	-1.02636	0.133648	-0.759297
		440	-0.845012	-0.0951476	0.200026	0.129052	-0.141356	-0.180397	1.20669	-0.531751	-0.0912874	0.695605	-0.906952	0.630313	-0.59936			1286	-0.513074	-0.238464	-0.240637	-1.00867	-0.141356	-0.180397	1.72952	-0.531751	-0.0912874	0.695605	-0.401681	-0.489874	-0.445349
		442	-1.34268	0.375797	1.75417	0.845441	-0.141356	-0.180397	-0.722768	1.87885	-0.0912874	0.695605	-2.79395	1.5585	-0.829178			1296	-0.785209	0.523979	-0.0642385	0.811782	-0.141356	-0.180397	0.562073	1.87885	-0.0912874	0.695605	0.637868	0.769563	-0.118363
		443	-0.406009	1.30821	1.08179	-0.398986	-0.141356	2.98528	-0.722768	1.87885	-0.0912874	0.695605	-0.562785	0.21625	-0.814777			1298	0.343653	-1.19152	0.27681	1.08291	-0.141356	-0.180397	-0.722768	-0.531751	-0.0912874	0.695605	-0.022302	-0.453429	-0.389034
		444	0.892413	0.599385	-1.41021	1.14449	-0.141356	-0.180397	-0.722768	-0.531751	-0.0912874	-1.43628	1.59155	0.602131	1.75424			1299	-0.461815	0.787902	-0.302247	0.0171169	-0.141356	-0.180397	0.719009	1.87885	-0.0912874	0.695605	0.480098	0.186384	0.645519
		446	-0.122727	0.383938	1.37806	-0.410068	-0.141356	-0.180397	-0.722768	-0.531751	-0.0912874	0.695605	-0.0162326	-0.536239	-0.333472			1302	-0.0318145	0.278908	-0.494279	-0.416608	-0.141356	-0.180397	-0.722768	-0.531751	-0.0912874	0.695605	0.298905	-0.213759	-0.407721
		447	-0.521932	0.383938	0.674489	0.286043	-0.141356	-0.180397	1.43565	-0.531751	-0.0912874	0.695605	-0.480792	0.363882	-0.59936			1303	-0.813659	1.12304	-0.574123	0.0854553	-0.141356	-0.180397	0.71385	1.87885	-0.0912874	0.695605	0.503708	0.623473	0.844225
		448	-0.372525	0.787902	-0.458557	-0.146754	-0.141356	-0.180397	2.08137	-0.531751	-0.0912874	0.695605	-0.146877	0.868785	-0.0835696			1312	0.926234	1.66764	-1.41021	1.89077	-0.141356	9.31662	-0.722768	-0.531751	-0.0912874	0.695605	0.794142	-0.34585	0.805236
		451	0.208514	-0.68696	1.68103	1.01456	-0.141356	-0.180397	-0.722768	-0.531751	-0.0912874	-1.43628	0.31461	-0.560362	-0.760928			1313	1.91552	-1.87227	0.106201	0.118892	-0.141356	-0.180397	-0.722768	-0.531751	-0.0912874	-1.43628	0.635467	-1.40693	0.10276
		452	-0.0148443	1.96861	-0.816727	1.64326	-0.141356	-0.180397	-0.722768	-0.531751	-0.0912874	0.695605	1.45771	0.238921	1.89223			1318	0.22274	-1.19152	-0.354995	-0.265337	-0.141356	-0.180397	-0.722768	-0.531751	-0.0912874	-1.43628	0.214837	-1.15147	-0.841633
		454	-0.650956	-0.361439	0.502592	0.114577	-0.141356	-0.180397	-0.722768	-0.531751	-0.0912874	0.695605	-0.638376	0.247476	-0.820895			1322	-0.975656	1.1478	-0.317515	0.217876	-0.141356	-0.180397	0.679858	1.87885	-0.0912874	0.695605	0.329292	1.00619	-0.560319
		456	-0.889466	0.599385	0.319923	-0.35561	-0.141356	-0.180397	-0.722768	1.87885	-0.0912874	0.695605	-0.913521	0.147457	-0.759297			1332	-0.6445	1.1775	-0.497244	0.804947	-0.141356	-0.180397	0.444754	1.87885	-0.0912874	0.695605	1.03185	0.431533	1.11257
		458	-0.50646	-0.908743	-0.37567	-1.00867	-0.141356	-0.180397	1.68604	-0.531751	-0.0912874	0.695605	-0.649997	0.0450574	-0.0835696			1334	-0.267194	0.925004	0.815777	-0.255005	-0.141356	-0.180397	-0.152072	-0.531751	-0.0912874	0.695605	-0.0136283	-0.485	-0.199512
		459	-0.335468	-0.285821	2.45958	0.399384	-0.141356	-0.180397	-0.722768	-0.531751	-0.0912874	-1.43628	-0.916072	-0.144634	-0.813249			1335	-0.267194	-0.411746	-0.757659	0.0036706	-0.141356	-0.180397	-0.722768	-0.531751	-0.0912874	0.695605	0.617263	-0.180323	0.557364
		460	0.208514	1.61959	-0.73245	2.66786	-0.141356	-0.180397	0.375604	-0.531751	-0.0912874	0.695605	2.12186	0.215622	1.76092			1352	0.360926	1.1775	-0.851598	0.65609	-0.141356	-0.180397	-0.722768	-0.531751	-0.0912874	0.695605	1.57703	-0.705658	1.87063
		462	1.45386	-0.188955	1.20585	-0.0286069	-0.141356	-0.180397	-0.722768	-0.531751	-0.0912874	-1.43628	0.57632	-1.24493	-0.376375			1356	0.679818	0.0338371	0.852166	-1.00867	-0.141356	-0.180397	-0.722768	-0.531751	-0.0912874	-1.43628	0.593789	-0.429265	-0.0148434
		463	0.839264	1.08414	1.14188	-0.226631	-0.141356	-0.180397	-0.722768	1.87885	-0.0912874	0.695605	0.385024	-0.00838622	-0.303409			1358	-0.790628	1.39534	0.165597	-1.00867	-0.141356	-0.180397	1.7423	-0.531751	-0.0912874	0.695605	-0.977336	0.454417	-0.591523
		464	-0.0996956	-0.353117	-0.238145	0.876884	-0.141356	-0.180397	1.53534	-0.531751	-0.0912874	0.695605	0.652128	-0.0932352	-0.296839			1366	-0.832503	-0.110322	-0.536648	1.72171	-0.141356	-0.180397	0.510287	-0.531751	10.9443	0.695605	0.345043	0.656182	2.04036
		467	1.19005	-2.41687	-1.41021	0.160363	-0.141356	-0.180397	-0.722768	-0.531751	-0.0912874	-1.43628	0.887409	-1.1341	-0.327589			1369	-0.6445	-0.619685	0.681482	-1.00867	-0.141356	-0.180397	-0.722768	-0.531751	-0.0912874	0.695605	-1.55618	0.280369	-0.841633
		468	-0.0996956	-0.869056	-0.404512	0.776014	-0.141356	-0.180397	-0.722768	-0.531751	-0.0912874	0.695605	0.691685	-1.25169	0.217128			1371	-0.260913	0.383938	-0.426388	0.200634	-0.141356	-0.180397	1.50493	1.87885	-0.0912874	0.695605	0.929957	-0.0357199	1.93509
		474	-0.667621	0.85074	1.15214	-0.306541	-0.141356	-0.180397	1.06592	-0.531751	-0.0912874	0.695605	-1.06711	0.703574	-0.820895			1377	-0.0996956	-0.353117	-0.494279	0.776014	-0.141356	-0.180397	-0.722768	-0.531751	-0.0912874	0.695605	1.01147	-0.521143	1.89223
		475	-0.68801	-0.119332	0.509694	-0.300124	-0.141356	-0.180397	1.12357	-0.531751	-0.0912874	0.695605	-1.50187	0.247559	-0.800261			1382	-0.122727	-0.0828633	0.7344	1.07817	-0.141356	-0.180397	-0.722768	-0.531751	-0.0912874	0.695605	-0.175109	0.00741163	-0.370431
		476	0.706392	0.222353	0.297141	-0.0570656	-0.141356	-0.180397	0.866478	-0.531751	-0.0912874	0.695605	0.455303	-1.1945	0.717866			1383	0.343653	-0.57884	-0.290756	-0.303582	-0.141356	-0.180397	-0.722768	-0.531751	-0.0912874	0.695605	0.143065	-0.199375	1.78309
		477	-0.267194	0.0338371	0.595812	1.04677	-0.141356	-0.180397	-0.722768	-0.531751	-0.0912874	0.695605	0.0127511	-0.70181	-0.0835696			1403	-0.292456	-0.57884	-1.19383	-0.547747	-0.141356	-0.180397	-0.722768	-0.531751	-0.0912874	-1.43628	-0.388889	0.259706	-0.510876
		478	-0.532521	0.118344	2.40762	-0.196957	-0.141356	-0.180397	-0.722768	-0.531751	-0.0912874	-1.43628	-2.72701	0.542833	-0.829178			1405	-0.122727	0.150538	0.200046	-1.00867	-0.141356	-0.180397	1.87675	1.87885	-0.0912874	0.695605	-0.778234	-0.645975	-0.745054
		479	-0.532521	1.30145	-0.255014	-0.130729	-0.141356	-0.180397	1.45277	-0.531751	-0.0912874	0.695605	0.025927	0.286587	1.11257			1409	-0.19182	0.150538	-0.612936	-1.00867	-0.141356	-0.180397	1.22519	1.87885	-0.0912874	0.695605	-0.425639	-0.461914	-0.840134
		483	-0.357644	1.11215	0.808538	-0.486157	-0.141356	-0.180397	0.0312658	-0.531751	-0.0912874	0.695605	-0.0265921	0.0663786	-0.521641			1410	0.360926	0.85074	1.24409	1.98299	-0.141356	-0.180397	-0.722768	-0.531751	-0.0912874	0.695605	0.581965	-0.213593	-0.475926
		484	-0.0996956	-0.353117	-0.300846	-0.354285	-0.141356	-0.180397	0.280073	-0.531751	-0.0912874	0.695605	0.632599	0.0171399	0.15216			1418	-0.19182	-0.0828633	2.99092	0.343148	-0.141356	-0.180397	-0.722768	-0.531751	-0.0912874	-1.43628	-1.9224	-0.443834	-0.841633
		488	-0.544434	1.50426	-1.41021	0.376329	-0.141356	-0.180397	-0.722768	-0.531751	-0.0912874	-1.43628	0.847038	1.81383	1.60229			1423	-0.936679	0.73404	0.249574	0.515928	-0.141356	-0.180397	0.517849	1.87885	-0.0912874	0.695605	0.291392	1.1055	-0.718732
		489	-0.471736	-0.419998	-0.9199	-0.119386	-0.141356	-0.180397	-0.722768	-0.531751	-0.0912874	-1.43628	-0.138922	0.888384	-0.678559			1425	0.706392	-0.531711	0.661904	-0.0205824	-0.141356	-0.180397	-0.722768	-0.531751	-0.0912874	-1.43628	0.033946	-1.09465	-0.555271
		491	-0.0148443	-0.353117	1.44498	0.261629	-0.141356	-0.180397	-0.722768	-0.531751	-0.0912874	-1.43628	-0.616188	-0.919721	-0.824492			1428	-0.406009	0.720036	0.854807	-1.00867	-0.141356	-0.180397	-0.722768	-0.531751	-0.0912874	0.695605	-0.681865	-0.00927308	-0.815314
		496	-0.406009	0.131865	1.8359	0.432673	-0.141356	-0.180397	-0.722768	-0.531751	-0.0912874	0.695605	-0.854577	-0.24735	-0.833325			1432	4.09196	-1.43659	-1.41021	-1.00867	-0.141356	-0.180397	-0.722768	-0.531751	-0.0912874	-1.43628	0.691501	-0.573323	1.28013
		497	-0.889466	0.348031	0.564153	0.265207	-0.141356	-0.180397	1.14282	-0.531751	-0.0912874	0.695605	-0.445423	0.759452	-0.800261			1433	-0.278118	0.14039	0.0612605	-0.507666	-0.141356	-0.180397	-0.722768	-0.531751	-0.0912874	0.695605	0.0360319	-0.034481	-0.763375
		499	0.0899721	1.93994	-0.595106	-1.00867	-0.141356	-0.180397	1.06375	-0.531751	-0.0912874	0.695605	0.461398	0.299888	1.66783			1435	-0.450169	-1.99066	-1.41021	-1.00867	4.66476	-0.180397	-0.722768	-0.531751	-0.0912874	0.695605	-0.418165	-1.09624	-0.841633
		501	-0.278118	0.353495	-0.411981	-0.495036	-0.141356	-0.180397	1.61016	1.87885	-0.0912874	0.695605	0.383424	0.136509	1.11257			1437	0.22274	-0.885179	-0.541078	0.277051	-0.141356	-0.180397	-0.722768	-0.531751	-0.0912874	0.695605	0.550428	-0.447066	1.41326
		502	-0.889466	0.473708	-0.372654	0.80814	-0.141356	-0.180397	1.14717	1.87885	-0.0912874	0.695605	0.393019	0.180664	0.98056			1440	0.208514	0.177996	0.89535	1.1581	-0.141356	-0.180397	-0.722768	1.87885	-0.0912874	0.695605	0.721094	-0.741807	0.0190983
		504	0.706392	0.0338371	-1.41021	0.317901	-0.141356	-0.180397	0.044173	-0.531751	-0.0912874	0.695605	1.0544	-0.173214	0.0190983			1442	-0.19182	-0.316264	0.878985	-1.00867	-0.141356	-0.180397	-0.722768	-0.531751	-0.0912874	-1.43628	-1.01424	-0.0556942	-0.771135
		506	-0.677855	-1.10983	-0.585994	0.400908	-0.141356	-0.180397	-0.722768	-0.531751	-0.0912874	0.695605	0.0618199	0.390985	-0.370431			1445	0.0899721	-0.783066	1.51855	-1.00867	-0.141356	-0.180397	-0.722768	-0.531751	-0.0912874	-1.43628	-1.49349	-0.076425	-0.714092
		508	-0.713363	0.271003	-1.41021	1.45867	-0.141356	-0.180397	1.06488	-0.531751	-0.0912874	0.695605	0.949105	-0.18703	1.50885			1463	-0.204382	-0.188955	-0.310522	-1.00867	-0.141356	-0.180397	2.02216	-0.531751	-0.0912874	0.695605	-0.639845	-0.340643	-0.634813
		510	-0.754911	0.610475	-0.36225	-1.00867	-0.141356	-0.180397	1.84724	-0.531751	-0.0912874	0.695605	-0.327934	0.179149	0.184771			1467	0.0700071	0.162822	0.696704	-0.378748	-0.141356	-0.180397	-0.722768	-0.531751	-0.0912874	0.695605	0.242613	-0.0014344	-0.813455
		514	0.499113	-0.456305	1.28848	-0.27597	-0.141356	-0.180397	-0.722768	-0.531751	-0.0912874	-1.43628	-0.0189168	-1.35999	-0.359308			1471	-0.695101	1.74191	0.136394	-0.242728	-0.141356	2.98528	1.46323	-0.531751	-0.0912874	0.695605	-0.169228	0.187432	-0.771544
		516	1.14608	-0.374614	0.0407662	-0.065173	-0.141356	-0.180397	-0.722768	-0.531751	-0.0912874	-1.43628	0.539036	-0.691537	0.449049			1472	-0.50646	1.16493	0.0678335	0.0937316	-0.141356	6.15095	-0.722768	1.87885	-0.0912874	0.695605	0.530888	-0.186847	-0.498644
		518	1.51248	-0.946447	0.0928897	0.992536	-0.141356	-0.180397	-0.722768	-0.531751	-0.0912874	-1.43628	0.926927	-1.35965	0.802437			1480	-0.840425	-0.694752	-1.1282	-0.0947798	-0.141356	-0.180397	-0.722768	-0.531751	-0.0912874	-1.43628	-1.4667	0.886349	-0.759297
		519	-0.335468	0.14039	-0.463154	0.592468	-0.141356	-0.180397	1.78832	1.87885	-0.0912874	0.695605	0.905189	-0.475398	2.04036			1490	-0.513074	0.487672	-0.114695	-0.521945	-0.141356	-0.180397	-0.722768	-0.531751	-0.0912874	0.695605	0.150828	0.136093	-0.678559
		520	-0.345027	0.442289	0.137052	0.946425	-0.141356	-0.180397	0.621647	1.87885	-0.0912874	0.695605	0.766663	0.332163	1.71621			1496	-0.163418	1.20592	-0.460479	-0.475389	-0.141356	-0.180397	1.71846	-0.531751	-0.0912874	0.695605	0.48061	1.35977	0.98056
		521	0.360926	-1.76335	-0.444672	-0.279198	-0.141356	-0.180397	-0.722768	-0.531751	-0.0912874	-1.43628	0.136054	0.139238	-0.800261			1502	-0.108181	-0.211234	-0.45524	-0.419243	-0.141356	-0.180397	-0.722768	-0.531751	-0.0912874	0.695605	-0.196253	0.124991	-0.246809
		523	-0.345027	0.646514	1.16505	-0.460505	-0.141356	-0.180397	-0.722768	-0.531751	-0.0912874	0.695605	-0.475184	-0.161542	-0.826691			1503	0.22274	-0.272502	-1.41021	0.524512	-0.141356	-0.180397	-0.722768	-0.531751	-0.0912874	0.695605	0.977201	-0.638714	0.527558
		525	-0.392818	0.14039	0.169723	-1.00867	-0.141356	-0.180397	0.778142	-0.531751	-0.0912874	0.695605	-0.652741	-0.782973	-0.831168			1510	-0.461815	0.787902	-0.725158	-0.119087	-0.141356	-0.180397	2.00951	-0.531751	-0.0912874	0.695605	0.230293	-0.49735	1.95636
		526	0.184806	0.306138	-0.070613	1.14316	-0.141356	-0.180397	-0.722768	-0.531751	-0.0912874	0.695605	0.732099	0.554647	1.71621			1514	-0.335468	-1.13824	-0.306975	-1.00867	-0.141356	-0.180397	1.64354	-0.531751	-0.0912874	0.695605	-0.463895	-0.139406	-0.0490645
		527	-0.915614	-0.743217	0.180796	-0.48001	-0.141356	-0.180397	-0.722768	1.87885	-0.0912874	0.695605	-2.52966	0.480224	-0.833325			1515	-0.309278	0.523979	-0.740395	0.445478	-0.141356	-0.180397	-0.722768	-0.531751	-0.0912874	-1.43628	0.442062	2.14348	0.0527652
		531	0.926234	-0.634538	-1.41021	1.42907	-0.141356	-0.180397	0.876771	-0.531751	-0.0912874	0.695605	1.89638	-1.00855	1.91157			1516	-0.948209	0.0338371	-0.505837	-1.00867	-0.141356	-0.180397	0.635468	-0.531751	-0.0912874	0.695605	3.8037	0.653526	1.82709
		533	-0.682159	0.271003	-0.726817	1.11472	-0.141356	-0.180397	0.980085	-0.531751	-0.0912874	0.695605	0.634387	0.269107	1.89223			1517	-0.744566	0.903444	-1.41021	1.53211	-0.141356	-0.180397	1.12938	-0.531751	-0.0912874	0.695605	2.1982	0.194693	2.04036
		536	0.22274	1.25919	-1.41021	0.470716	-0.141356	9.31662	-0.722768	-0.531751	-0.0912874	0.695605	0.578809	-0.373973	-0.723175			1526	-0.713363	0.271003	1.3343	-1.00867	-0.141356	-0.180397	-0.722768	-0.531751	-0.0912874	0.695605	-1.20487	-0.0320098	-0.841633
		537	-0.554412	-0.783066	-0.165787	-0.581377	-0.141356	-0.180397	0.784636	-0.531751	-0.0912874	0.695605	-0.797019	-0.477826	-0.594695			1530	-0.675473	-0.666366	-1.41021	-1.00867	-0.141356	-0.180397	-0.722768	-0.531751	-0.0912874	-1.43628	0.470907	-0.784139	-0.802649
		538	-0.204382	-0.188955	0.419837	-0.501925	-0.141356	-0.180397	0.939989	1.87885	-0.0912874	0.695605	-0.396762	0.0034583	-0.741562			1534	-0.204382	-0.411746	0.471946	0.0359481	-0.141356	-0.180397	-0.722768	-0.531751	-0.0912874	-1.43628	-0.0883293	-0.177834	-0.791625
		540	-0.204382	-0.411746	1.18424	-1.00867	-0.141356	-0.180397	-0.722768	1.87885	-0.0912874	-1.43628	-0.113323	-0.0224455	-0.333472			1535	-0.00486173	-1.84023	-1.41021	-1.00867	-0.141356	-0.180397	-0.722768	1.87885	-0.0912874	-1.43628	-0.500361	0.136914	-0.573903
		541	-0.204382	0.479421	1.63245	-0.412255	-0.141356	-0.180397	-0.722768	-0.531751	-0.0912874	0.695605	-0.344907	-0.463111	-0.0490645			1540	-0.0148443	-0.611086	1.83835	-1.00867	-0.141356	-0.180397	-0.722768	-0.531751	-0.0912874	-1.43628	-1.79519	0.214593	-0.841633
		544	-0.461815	0.787902	0.94037	-0.442572	-0.141356	-0.180397	-0.722768	-0.531751	-0.0912874	0.695605	-0.73804	-0.212013	-0.800261			1542	4.09196	-3.39716	-1.41021	-1.00867	-0.141356	-0.180397	-0.722768	-0.531751	-0.0912874	-1.43628	1.58772	-1.667	1.77069
		545	-1.31516	0.192974	-1.13952	1.63905	-0.141356	-0.180397	0.225694	-0.531751	-0.0912874	0.695605	0.837099	2.63187	-0.698597			1551	-0.639735	0.963417	3.30236	-0.358922	-0.141356	-0.180397	-0.722768	-0.531751	-0.0912874	0.695605	-1.78543	-0.221821	-0.823556
		546	3.12466	-2.41687	-1.41021	-1.00867	-0.141356	-0.180397	-0.722768	-0.531751	-0.0912874	-1.43628	1.31908	-1.73894	1.83802			1557	-0.6445	-0.619685	-1.05458	-0.61301	-0.141356	-0.180397	-0.722768	-0.531751	-0.0912874	-1.43628	-0.799526	0.556595	-0.825117
		547	-0.0996956	-0.353117	1.48654	0.537877	-0.141356	-0.180397	-0.722768	-0.531751	-0.0912874	0.695605	0.239056	-0.407562	-0.800261			1560	-0.108181	0.0338371	-0.234689	-0.3813	-0.141356	-0.180397	-0.722768	-0.531751	-0.0912874	0.695605	-0.386059	0.0200735	-0.674563
		549	-0.695101	0.702212	0.20395	-0.0266507	-0.141356	-0.180397	2.01706	-0.531751	-0.0912874	0.695605	-0.548627	0.0981296	-0.718732			1565	-1.1861	0.407674	-1.19817	-0.130013	-0.141356	-0.180397	1.61864	-0.531751	-0.0912874	0.695605	-0.818555	2.29035	0.119292
		550	-1.00633	1.48198	-1.03481	1.41611	-0.141356	2.98528	-0.722768	1.87885	-0.0912874	0.695605	-0.524645	1.46616	-0.759297			1567	0.926234	-2.00842	-0.445673	-0.179386	-0.141356	-0.180397	-0.722768	-0.531751	-0.0912874	-1.43628	0.182361	-0.845139	-0.841633
		554	-0.335468	0.5666	-0.412636	-0.448524	-0.141356	-0.180397	1.59265	-0.531751	-0.0912874	0.695605	-0.221809	-0.190533	-0.638771			1569	-0.637088	0.669206	-1.41021	1.63629	-0.141356	-0.180397	0.732262	-0.531751	-0.0912874	0.695605	2.35333	-0.857901	2.04036
		556	-0.345027	1.46342	-0.286958	-0.428412	-0.141356	-0.180397	1.35863	-0.531751	-0.0912874	0.695605	0.656481	-0.221233	1.3401			1577	-0.260913	-0.549665	-0.59188	0.133273	-0.141356	-0.180397	-0.722768	-0.531751	-0.0912874	0.695605	0.817993	-0.419958	1.0865
		557	-0.260913	1.11215	-0.5532	-0.0813725	-0.141356	-0.180397	1.95953	-0.531751	-0.0912874	0.695605	0.247471	1.35184	1.57912			1582	-0.560317	1.25919	-0.610436	0.2979	-0.141356	2.98528	1.34384	-0.531751	-0.0912874	0.695605	0.497802	0.134514	-0.296839
		558	-0.833981	-0.176224	-0.468102	-1.00867	-0.141356	-0.180397	1.76906	-0.531751	-0.0912874	0.695605	-0.707801	0.119174	-0.560319			1586	-0.397598	0.85074	-0.514545	1.01559	-0.141356	-0.180397	1.14726	-0.531751	-0.0912874	0.695605	1.42743	-0.527329	1.97752
		559	-1.3274	0.332704	-0.253645	1.00139	-0.141356	-0.180397	0.136344	-0.531751	-0.0912874	0.695605	-0.777149	3.00308	-0.224527			1587	-0.278118	-0.498926	0.873932	-0.492229	-0.141356	-0.180397	-0.722768	-0.531751	-0.0912874	-1.43628	-0.199554	0.0227195	-0.786821
		560	-0.122727	-0.316264	0.155317	-1.00867	-0.141356	-0.180397	1.67202	-0.531751	-0.0912874	0.695605	-0.425352	-0.453845	-0.0835696			1589	-0.345027	-0.783066	1.29161	0.354159	-0.141356	-0.180397	-0.722768	-0.531751	-0.0912874	-1.43628	-0.600642	-0.303443	-0.803638
		561	-0.677855	0.0338371	0.10243	-0.549585	-0.141356	-0.180397	-0.722768	-0.531751	-0.0912874	0.695605	-0.617979	0.0341576	-0.825863			1591	-0.50646	1.16493	-0.00404102	0.0885632	-0.141356	6.15095	-0.722768	1.87885	-0.0912874	0.695605	0.20511	-0.135664	-0.746882
		562	1.19005	-0.456305	-1.41021	0.385719	-0.141356	-0.180397	-0.722768	-0.531751	-0.0912874	0.695605	1.43037	-0.0345595	1.40358			1594	0.0899721	2.21225	-0.750898	2.43426	-0.141356	-0.180397	-0.722768	-0.531751	-0.0912874	0.695605	1.99881	-0.266039	2.01952
		563	0.520372	1.08414	-0.547931	0.0742739	-0.141356	-0.180397	-0.722768	-0.531751	-0.0912874	0.695605	1.01599	0.086236	1.78309			1606	1.36592	-0.783066	0.464256	-1.00867	-0.141356	-0.180397	-0.722768	-0.531751	-0.0912874	-1.43628	-0.0615812	-0.695053	-0.657305
		566	0.499113	0.197218	1.25877	0.568426	-0.141356	-0.180397	0.584966	-0.531751	-0.0912874	0.695605	0.701945	-0.496207	0.637661			1612	0.892413	2.86158	-0.461549	0.0554243	-0.141356	-0.180397	0.688192	-0.531751	-0.0912874	-1.43628	1.36579	-0.488096	1.94574
		567	-0.345027	-0.170389	0.266588	-0.147108	-0.141356	-0.180397	-0.722768	-0.531751	-0.0912874	0.695605	-0.0289146	-0.344965	-0.370431			1618	-0.760823	0.103857	-0.484505	-0.640311	-0.141356	-0.180397	-0.722768	-0.531751	-0.0912874	-1.43628	-1.29376	1.16552	-0.800261
		569	-0.840425	0.894897	0.743117	-0.155094	-0.141356	-0.180397	1.2114	-0.531751	-0.0912874	0.695605	-1.52205	0.782615	-0.638771			1620	-0.108181	-0.456305	-0.750488	-0.479318	-0.141356	-0.180397	1.81215	-0.531751	-0.0912874	0.695605	-0.143859	-0.175912	-0.59936
		570	-0.919827	0.73404	-0.033164	-0.0532552	-0.141356	-0.180397	1.45199	1.87885	-0.0912874	0.695605	-0.210242	1.35021	-0.81676			1621	0.499113	0.197218	2.24419	-0.107666	-0.141356	-0.180397	-0.722768	-0.531751	-0.0912874	-1.43628	-0.0994927	-0.466572	-0.726854
		573	-1.46195	0.723099	0.0535387	0.988258	-0.141356	-0.180397	1.23297	-0.531751	-0.0912874	0.695605	-3.59071	6.3816	-0.759297			1628	-0.729048	-0.110322	0.518675	-0.350461	-0.141356	-0.180397	1.91671	1.87885	-0.0912874	0.695605	-1.51058	-0.206739	-0.638771
		574	-0.933308	1.04998	0.698395	0.158474	-0.141356	-0.180397	0.981578	-0.531751	-0.0912874	0.695605	-1.59326	1.14744	-0.759297			1639	-0.204382	0.479421	1.22751	-0.434345	-0.141356	-0.180397	0.755842	-0.531751	-0.0912874	0.695605	-0.602269	0.100607	-0.370431
		575	-0.713363	1.21966	0.0833277	0.342944	-0.141356	2.98528	0.538662	1.87885	-0.0912874	0.695605	0.634147	-0.0348403	-0.580184			1646	-0.406009	-0.260248	0.298422	-1.00867	-0.141356	-0.180397	1.16623	-0.531751	-0.0912874	0.695605	-1.16636	-0.302736	-0.775061
		576	-0.204382	0.0338371	-0.0872778	-1.00867	-0.141356	-0.180397	1.93318	-0.531751	-0.0912874	0.695605	-0.833007	-0.659739	-0.674563			1652	-0.204382	1.37059	0.311516	-0.356704	-0.141356	-0.180397	-0.722768	-0.531751	-0.0912874	0.695605	0.435661	-0.025408	1.39121
		577	-0.813659	1.25919	0.983426	-1.00867	-0.141356	-0.180397	0.116968	-0.531751	-0.0912874	0.695605	-1.30656	0.502936	-0.841633			1665	1.91552	-0.783066	2.90998	-1.00867	-0.141356	-0.180397	-0.722768	-0.531751	-0.0912874	-1.43628	-0.296013	-1.26539	-0.776985
		578	-0.568259	-0.388699	2.40762	-0.196957	-0.141356	-0.180397	-0.722768	-0.531751	-0.0912874	-1.43628	-2.3013	0.367948	-0.629278			1670	-0.611144	0.68736	0.300026	0.206306	-0.141356	-0.180397	-0.722768	-0.531751	-0.0912874	0.695605	-1.04547	0.295728	-0.48332
		579	0.499113	0.85074	2.13507	1.02845	-0.141356	-0.180397	-0.722768	1.87885	-0.0912874	0.695605	-0.00152241	-0.581707	-0.678559			1671	-0.0318145	-0.456305	-0.752787	-1.00867	-0.141356	-0.180397	-0.722768	-0.531751	-0.0912874	-1.43628	-0.271757	1.08543	-0.841633
		582	-0.521932	1.43424	-0.304098	0.387402	-0.141356	-0.180397	1.12483	-0.531751	-0.0912874	0.695605	0.439487	0.438704	0.249235			1674	0.926234	0.0338371	4.59704	0.331379	-0.141356	-0.180397	-0.722768	-0.531751	-0.0912874	-1.43628	-0.818512	-0.497455	-0.621345
		584	-0.345027	0.238063	0.818619	0.50325	-0.141356	-0.180397	0.991029	1.87885	-0.0912874	0.695605	-0.233257	0.0087474	-0.638771			1682	-0.554412	-1.69074	-0.549078	-0.276551	-0.141356	-0.180397	-0.722768	-0.531751	-0.0912874	-1.43628	-1.69546	-0.580292	-0.820358
		586	0.343653	-0.57884	1.49483	-0.265337	-0.141356	-0.180397	-0.722768	-0.531751	-0.0912874	-1.43628	0.15048	-1.01767	-0.658618			1683	-0.0996956	-1.38499	-0.852304	-0.472523	-0.141356	-0.180397	1.61526	-0.531751	-0.0912874	0.695605	-0.371285	-0.591954	0.13543
		587	-0.19182	1.08414	-0.254128	0.174973	-0.141356	-0.180397	-0.722768	-0.531751	-0.0912874	0.695605	0.257248	-0.509454	-0.841625			1687	-0.461815	0.976418	-1.41021	1.37971	-0.141356	-0.180397	-0.722768	-0.531751	-0.0912874	0.695605	1.59357	0.721807	1.24051
		588	-0.267194	0.925004	0.572742	0.952529	-0.141356	-0.180397	0.147629	1.87885	-0.0912874	0.695605	0.751254	-0.234573	-0.333472			1690	0.892413	-0.154679	0.263227	-1.00867	-0.141356	-0.180397	0.852211	-0.531751	-0.0912874	0.695605	0.787345	-0.831899	1.80515
		593	-0.956666	0.774749	0.465225	-0.103985	-0.141356	-0.180397	-0.722768	1.87885	-0.0912874	0.695605	-0.732015	0.469834	-0.806441			1693	-0.0318145	1.25919	-0.71785	-0.250609	-0.141356	-0.180397	0.309705	1.87885	-0.0912874	0.695605	1.48296	0.518478	1.36463
		594	0.360926	-2.09011	-0.708648	-0.353436	-0.141356	-0.180397	-0.722768	-0.531751	-0.0912874	-1.43628	-0.297641	-1.26172	-0.841633			1698	1.45386	-1.08012	1.1677	-0.0990306	-0.141356	-0.180397	-0.722768	-0.531751	-0.0912874	-1.43628	0.307804	-1.53689	-0.56732
		596	-0.554412	0.85074	-0.114064	-0.454316	-0.141356	-0.180397	0.320087	1.87885	-0.0912874	0.695605	0.414222	-0.176039	-0.804751			1699	0.315203	-0.68696	0.884788	-0.46185	-0.141356	-0.180397	-0.722768	-0.531751	-0.0912874	0.695605	-0.594393	-1.51452	-0.812786
		597	-0.204382	-0.411746	1.19136	0.062357	-0.141356	-0.180397	-0.722768	1.87885	-0.0912874	0.695605	-0.0964465	-0.279814	-0.759297			1715	-0.0148443	-0.353117	-0.692568	-0.44806	-0.141356	-0.180397	2.00471	-0.531751	-0.0912874	0.695605	0.337483	-0.775774	1.11257
		598	-1.06042	0.0338371	0.599839	-0.482752	-0.141356	-0.180397	1.75121	-0.531751	-0.0912874	0.695605	-2.93382	0.363024	-0.833325			1722	1.19005	-1.08012	-0.458557	-1.00867	-0.141356	-0.180397	1.80522	-0.531751	-0.0912874	-1.43628	0.49695	-1.50469	-0.667101
		599	-1.17903	0.278908	-0.527943	-0.36066	-0.141356	-0.180397	-0.722768	-0.531751	-0.0912874	0.695605	-1.35997	2.25844	0.0527652			1728	1.14608	-1.59997	0.706834	-1.00867	-0.141356	-0.180397	-0.722768	-0.531751	-0.0912874	-1.43628	-0.0872044	-1.17006	-0.777394
		603	-0.650956	1.21966	0.210224	-0.584637	-0.141356	-0.180397	1.8441	-0.531751	-0.0912874	0.695605	-0.707923	-0.32122	-0.487136			1741	0.926234	-0.783066	0.254983	0.854204	-0.141356	-0.180397	-0.722768	-0.531751	-0.0912874	0.695605	1.03715	-1.15075	0.844225
		604	-0.461815	-0.154679	0.442229	-0.0522012	-0.141356	-0.180397	-0.722768	-0.531751	-0.0912874	0.695605	-0.222768	0.377908	-0.128859			1747	0.101826	-0.398641	0.247321	0.552985	-0.141356	-0.180397	-0.722768	1.87885	-0.0912874	0.695605	0.532475	-1.06401	-0.718732
		605	0.101826	-0.975279	-0.472976	1.46504	-0.141356	-0.180397	-0.722768	-0.531751	-0.0912874	0.695605	0.977012	-0.287002	1.87063			1755	0.360926	-0.456305	0.648282	-0.0721606	-0.141356	-0.180397	-0.722768	-0.531751	-0.0912874	-1.43628	0.119253	-1.06588	-0.814186
		608	-0.392818	0.14039	0.169723	-1.00867	-0.141356	-0.180397	0.751809	-0.531751	-0.0912874	0.695605	-0.643562	-0.795192	-0.841633			1764	-0.6445	-0.456305	-0.819863	-0.232395	-0.141356	-0.180397	0.76097	-0.531751	-0.0912874	0.695605	-0.413549	0.164799	-0.81676
		609	-0.68801	0.493345	0.408107	0.80881	-0.141356	-0.180397	0.58109	-0.531751	-0.0912874	0.695605	0.228106	0.871663	-0.74546			1775	-0.987063	0.920264	-0.42746	-0.752166	-0.141356	-0.180397	1.83371	1.87885	-0.0912874	0.695605	-1.84453	1.90751	-0.800261
		611	-0.184547	-0.456305	-1.08784	1.28949	-0.141356	-0.180397	-0.722768	-0.531751	-0.0912874	0.695605	1.18941	-0.0367299	1.97752			1786	-0.122727	0.383938	-0.870279	0.284035	-0.141356	-0.180397	0.660142	1.87885	-0.0912874	0.695605	0.969003	1.20552	1.82709
		612	-0.345027	0.442289	2.10742	-0.36275	-0.141356	-0.180397	-0.722768	-0.531751	-0.0912874	0.695605	-0.925214	0.122842	-0.825863			1792	-0.650956	-0.045218	-0.0369551	-0.240824	-0.141356	-0.180397	-0.722768	1.87885	-0.0912874	0.695605	-1.03228	0.532879	-0.837722
		614	-0.554412	0.487672	0.858984	-1.00867	-0.141356	-0.180397	-0.233228	-0.531751	-0.0912874	0.695605	-0.536254	-0.0371301	1.53006			1793	0.926234	-1.19152	0.40351	-0.065173	-0.141356	-0.180397	-0.722768	-0.531751	-0.0912874	-1.43628	0.623468	-0.913479	-0.110684
		615	-1.1664	0.592771	-0.779857	1.61372	-0.141356	-0.180397	0.692567	1.87885	-0.0912874	0.695605	0.506095	1.69909	1.48516			1794	0.926234	-1.19152	0.40351	-0.065173	-0.141356	-0.180397	-0.722768	-0.531751	-0.0912874	-1.43628	0.530593	-0.936477	-0.841633
		616	-0.695101	0.999268	0.312551	-0.279713	-0.141356	-0.180397	1.84451	1.87885	-0.0912874	0.695605	-0.488584	-0.117159	-0.596615			1805	1.91552	-1.32767	1.19313	-1.00867	-0.141356	-0.180397	-0.722768	-0.531751	-0.0912874	-1.43628	0.0437811	-0.438736	-0.841632
		617	-0.611144	1.34088	1.60014	0.877422	-0.141356	-0.180397	0.786831	-0.531751	-0.0912874	0.695605	-0.373576	0.0919558	-0.224527			1807	-0.722582	-0.188955	0.126796	-0.352723	4.66476	-0.180397	-0.722768	-0.531751	-0.0912874	0.695605	-0.802147	0.5427	-0.841631
		619	0.520372	-1.36657	-0.442557	-0.219254	-0.141356	-0.180397	-0.722768	-0.531751	-0.0912874	-1.43628	0.285964	-1.40375	-0.838432			1812	-0.568259	0.287359	0.190745	0.290699	-0.141356	-0.180397	-0.722768	-0.531751	-0.0912874	0.695605	-0.302453	0.437601	-0.759297
		620	-0.392818	-0.0727155	-0.0691278	0.257732	-0.141356	-0.180397	0.920838	1.87885	-0.0912874	0.695605	0.282414	-0.731956	-0.821715			1823	1.19005	-1.97129	-0.310522	-0.0990306	-0.141356	-0.180397	-0.722768	-0.531751	-0.0912874	-1.43628	0.312854	-0.457212	-0.596223
		624	0.520372	-0.666366	-0.118935	-1.00867	-0.141356	-0.180397	1.12056	-0.531751	-0.0912874	-1.43628	0.233733	-0.954669	0.390725			1824	-0.204382	-0.634538	-0.360054	-0.538668	-0.141356	-0.180397	2.15853	1.87885	-0.0912874	0.695605	-0.566607	-0.217158	-0.521641
		625	-0.521932	1.78434	0.136681	-0.108588	-0.141356	2.98528	1.45744	-0.531751	-0.0912874	0.695605	0.126668	-0.24578	-0.59936			1828	-0.577789	0.85074	0.735071	0.0852447	-0.141356	-0.180397	1.12565	-0.531751	-0.0912874	0.695605	-0.198591	0.258615	-0.0905051
		626	-0.729048	0.466315	0.990559	-0.350281	-0.141356	-0.180397	1.0504	-0.531751	-0.0912874	0.695605	-1.58092	0.494034	-0.81676
		627	0.520372	-1.66281	-1.41021	-1.00867	-0.141356	-0.180397	1.39929	1.87885	-0.0912874	0.695605	0.528043	-0.877709	-0.76313
		629	0.22274	0.646514	-0.741508	-1.00867	-0.141356	-0.180397	-0.722768	-0.531751	-0.0912874	0.695605	1.11496	-0.323101	1.60229
		630	0.184806	0.0338371	0.643892	0.123195	-0.141356	-0.180397	-0.722768	-0.531751	-0.0912874	0.695605	0.119652	0.22568	-0.808502
		632	-0.619752	0.745333	0.737192	-0.168345	-0.141356	-0.180397	1.02103	-0.531751	-0.0912874	0.695605	-0.718486	0.536626	0.0861616
		633	-0.260913	-0.316264	0.154958	0.101654	-0.141356	-0.180397	0.764128	-0.531751	10.9443	0.695605	-1.09316	0.135043	2.04036
		634	-0.682159	-0.519549	-0.14334	-1.00867	-0.141356	-0.180397	1.80465	-0.531751	-0.0912874	0.695605	-2.29759	-0.264139	-0.840801
		635	-0.729048	0.466315	0.634821	-0.663653	-0.141356	-0.180397	1.64137	1.87885	-0.0912874	0.695605	-0.908405	0.544912	-0.800261
		636	0.0700071	-0.0951476	-0.555561	-0.425636	-0.141356	-0.180397	-0.722768	-0.531751	-0.0912874	0.695605	0.220705	-0.173657	-0.0835696
		637	-0.267194	0.256629	-0.220447	-1.00867	-0.141356	-0.180397	0.487951	-0.531751	-0.0912874	0.695605	-0.932223	-0.210533	-0.826526
		640	-0.41717	1.35345	-0.0422783	-1.00867	-0.141356	-0.180397	1.92763	-0.531751	-0.0912874	0.695605	-0.220798	-0.52391	-0.521641
		641	-0.760823	0.103857	0.120864	-0.394923	-0.141356	-0.180397	2.00461	-0.531751	-0.0912874	0.695605	-1.69678	-0.183916	-0.759297
		643	-0.639735	1.47046	0.297216	0.118915	-0.141356	2.98528	-0.722768	1.87885	-0.0912874	0.695605	0.225315	0.0251652	-0.826029
		645	0.360926	-1.71667	-1.41021	-1.00867	-0.141356	-0.180397	1.41775	1.87885	-0.0912874	-1.43628	0.35066	-0.822042	-0.841633
		646	-0.521932	0.208888	1.50775	0.233643	-0.141356	-0.180397	-0.722768	-0.531751	-0.0912874	0.695605	-0.754438	-0.219968	-0.825035
		647	-0.754911	0.177996	-0.452905	-0.674719	-0.141356	-0.180397	2.02963	-0.531751	-0.0912874	0.695605	-0.912691	-0.0193663	-0.333472
		648	1.91552	1.39534	0.473625	3.30422	-0.141356	-0.180397	-0.722768	-0.531751	-0.0912874	-1.43628	1.74094	0.254285	2.04036
		649	-0.345027	-0.170389	0.989203	-1.00867	-0.141356	-0.180397	-0.722768	1.87885	-0.0912874	0.695605	-0.634329	0.2956	-0.517793
		650	-0.667621	1.29632	-0.305132	0.890916	-0.141356	-0.180397	1.81543	-0.531751	-0.0912874	0.695605	0.72836	1.91996	1.2906
		653	-0.722582	0.405157	0.0943371	1.86324	-0.141356	-0.180397	0.626924	-0.531751	-0.0912874	0.695605	1.30059	0.959816	1.18546
		654	-0.858367	0.610475	-1.41021	-0.256142	-0.141356	-0.180397	-0.722768	-0.531751	-0.0912874	-1.43628	-1.73583	0.136911	-0.841633
		655	-0.327881	0.976418	-0.678725	0.273527	-0.141356	-0.180397	2.01334	-0.531751	-0.0912874	0.695605	0.0582075	1.40188	0.844225
		656	0.120918	-0.456305	1.23327	-1.00867	-0.141356	-0.180397	-0.722768	-0.531751	-0.0912874	-1.43628	-1.23537	-0.700765	-0.797833
		658	0.585479	-0.57884	1.16781	-1.00867	-0.141356	-0.180397	-0.722768	-0.531751	-0.0912874	-1.43628	-0.670885	-0.568404	-0.783458
		660	0.706392	-2.03984	-0.552127	-0.246778	-0.141356	-0.180397	-0.722768	-0.531751	-0.0912874	-1.43628	-0.0449493	-0.656525	-0.775634
		662	-0.845012	0.420791	0.0399727	0.931688	-0.141356	-0.180397	-0.722768	-0.531751	-0.0912874	0.695605	0.18055	0.970925	-0.59936
		663	-0.777542	0.85074	0.0766231	0.319599	-0.141356	2.98528	-0.722768	1.87885	-0.0912874	0.695605	0.624634	0.158662	-0.841633
		664	1.36592	-0.783066	1.06408	-1.00867	-0.141356	-0.180397	-0.722768	-0.531751	-0.0912874	-1.43628	-0.0351585	-0.500602	-0.795488
		665	-0.532521	1.47046	0.0119337	-0.110049	-0.141356	-0.180397	1.21171	-0.531751	-0.0912874	0.695605	0.405057	0.414538	1.48516
		666	-0.790628	1.53149	-0.715004	1.08783	-0.141356	-0.180397	1.24531	1.87885	-0.0912874	0.695605	0.909534	0.942482	1.16422
		667	-0.824372	0.291807	0.864894	-0.44806	-0.141356	-0.180397	1.23759	-0.531751	-0.0912874	0.695605	-1.82329	0.346228	-0.800261
		668	-0.19182	-0.0828633	0.983029	-1.00867	-0.141356	-0.180397	-0.722768	1.87885	-0.0912874	-1.43628	-0.411653	-0.566613	-0.799602
		670	0.360926	0.85074	-0.407513	0.902593	-0.141356	-0.180397	-0.722768	-0.531751	-0.0912874	0.695605	0.960529	-0.042205	0.860547
		672	-0.785209	0.80406	0.432248	0.576617	-0.141356	-0.180397	0.757697	-0.531751	-0.0912874	0.695605	-0.310048	-0.0750491	1.24051
		673	-0.184547	-0.946447	-0.752427	-1.00867	-0.141356	-0.180397	1.45158	-0.531751	-0.0912874	0.695605	-0.21257	-0.504681	-0.841633
		674	-0.204382	-0.188955	0.935438	-0.480492	-0.141356	-0.180397	-0.722768	-0.531751	-0.0912874	0.695605	-0.345962	-0.306671	-0.840012
		675	-0.68801	0.799684	-0.437073	0.448045	-0.141356	-0.180397	-0.722768	1.87885	-0.0912874	0.695605	-0.423782	0.922435	-0.718732
		676	-0.637088	0.124604	-0.332265	-1.00867	-0.141356	-0.180397	-0.722768	-0.531751	-0.0912874	-1.43628	-0.958314	-0.180471	-0.732723
		677	-1.44674	0.348031	-0.347775	0.849252	-0.141356	-0.180397	0.737612	-0.531751	-0.0912874	0.695605	-1.54836	3.46775	-0.445349
		679	-0.560317	0.73404	-0.150002	-0.0384997	-0.141356	-0.180397	0.522186	1.87885	-0.0912874	0.695605	0.832173	0.289467	0.98056
		681	-0.0318145	2.48455	-0.693545	2.28696	-0.141356	2.98528	-0.722768	-0.531751	-0.0912874	0.695605	1.51118	0.590173	1.50885
		682	0.22274	1.25919	-1.41021	0.522207	-0.141356	9.31662	-0.722768	-0.531751	-0.0912874	0.695605	0.543622	-0.25584	0.298516
		683	1.19005	0.702212	4.07394	-1.00867	-0.141356	-0.180397	-0.722768	-0.531751	-0.0912874	-1.43628	-0.577528	-0.107062	-0.841633
		684	-0.454374	0.131865	0.447532	-0.458065	-0.141356	-0.180397	-0.722768	-0.531751	-0.0912874	0.695605	0.251672	-0.478905	-0.662598
		685	-0.717263	1.41236	0.756529	-0.470117	-0.141356	2.98528	-0.722768	1.87885	-0.0912874	0.695605	-0.504116	0.278518	-0.79989
		686	-0.809595	-0.456305	-1.07697	-0.0179198	-0.141356	-0.180397	-0.722768	1.87885	-0.0912874	0.695605	-0.810306	1.34394	-0.0835696
		689	-0.0148443	-1.12703	0.789163	-0.403211	-0.141356	-0.180397	-0.722768	-0.531751	-0.0912874	-1.43628	-0.0763497	-0.0868266	-0.808502
		691	0.926234	-0.783066	-1.41021	-1.00867	-0.141356	-0.180397	1.44534	1.87885	-0.0912874	-1.43628	0.593545	-0.967424	-0.456173
		692	-1.26038	-0.214786	-1.0406	-0.640552	-0.141356	-0.180397	0.5786	-0.531751	-0.0912874	0.695605	-2.95245	3.10926	0.119292
		693	-0.554412	0.306138	0.753936	-0.0153631	-0.141356	-0.180397	-0.722768	-0.531751	-0.0912874	-1.43628	-0.0552678	-0.404596	0.0190983
		694	0.208514	-0.68696	0.558151	-0.317551	-0.141356	-0.180397	-0.722768	-0.531751	-0.0912874	-1.43628	0.1223	-0.292644	-0.833325
		695	-0.0996956	-0.611086	-0.522812	-0.374671	-0.141356	-0.180397	-0.722768	1.87885	-0.0912874	0.695605	-0.194183	-0.299594	-0.673046
		696	-0.840425	1.15984	-1.17835	1.23632	-0.141356	-0.180397	1.41819	1.87885	-0.0912874	0.695605	1.29029	0.993053	1.84892
		699	-0.122727	0.617339	0.998493	-1.00867	-0.141356	-0.180397	0.950321	-0.531751	-0.0912874	0.695605	-0.300564	-0.656211	-0.0490645
		706	-0.184547	-0.456305	0.399901	0.679464	-0.141356	-0.180397	-0.722768	-0.531751	10.9443	0.695605	-0.913813	0.0270493	1.99857
		710	0.22274	-0.885179	-0.364165	1.63486	-0.141356	-0.180397	-0.722768	-0.531751	-0.0912874	0.695605	0.888367	-0.625813	1.48516
		711	0.101826	-0.885179	-0.910372	-1.00867	-0.141356	-0.180397	1.21511	1.87885	-0.0912874	0.695605	-0.323561	-0.113319	-0.841633
		712	-0.560317	0.208888	0.728998	0.435595	-0.141356	-0.180397	-0.722768	1.87885	-0.0912874	0.695605	0.267181	-0.53027	-0.278642
		715	-0.397598	-0.57884	-0.224991	-1.00867	-0.141356	-0.180397	-0.722768	1.87885	-0.0912874	-1.43628	-0.478865	0.547413	-0.786698
		716	0.360926	0.383938	-1.41021	0.0278997	-0.141356	-0.180397	0.73958	-0.531751	-0.0912874	0.695605	1.54508	-0.0468413	1.58516
		717	2.43372	0.646514	-1.41021	2.51603	-0.141356	-0.180397	-0.722768	-0.531751	-0.0912874	-1.43628	1.99529	0.917229	2.04036
		723	-1.35988	0.667166	-0.320068	1.38256	-0.141356	-0.180397	-0.028533	1.87885	-0.0912874	0.695605	0.0681534	3.26333	-0.832081
		728	-0.357644	-0.0641913	1.01504	-1.00867	-0.141356	-0.180397	-0.722768	-0.531751	-0.0912874	0.695605	-1.2377	-0.358052	-0.802196
		729	-0.0148443	-0.0951476	-0.322747	0.64814	-0.141356	-0.180397	-0.722768	-0.531751	-0.0912874	0.695605	0.653727	0.192866	0.871852
		730	-0.0787583	2.03896	-1.41021	-1.00867	-0.141356	-0.180397	-0.722768	-0.531751	-0.0912874	-1.43628	-2.38673	1.75592	-0.779401
		731	-0.813659	-0.510765	-0.143384	-0.736491	4.66476	-0.180397	1.86857	-0.531751	-0.0912874	0.695605	-1.63663	0.525667	-0.841633
		734	0.22274	-0.885179	1.04953	-0.244994	-0.141356	-0.180397	-0.722768	-0.531751	-0.0912874	0.695605	-0.314343	-0.789277	-0.569811
		736	-0.108181	1.01412	-0.148333	-1.00867	-0.141356	2.98528	-0.722768	1.87885	-0.0912874	0.695605	0.0219369	-0.202418	-0.642733
		737	-0.568259	-1.06476	0.713174	-0.329657	-0.141356	-0.180397	-0.722768	-0.531751	-0.0912874	-1.43628	-1.82161	-0.325934	-0.841633
		738	0.926234	-2.00842	-0.445673	-0.179386	-0.141356	-0.180397	-0.722768	-0.531751	-0.0912874	-1.43628	0.130606	-0.490772	-0.73005
		740	-0.345027	0.442289	1.05216	-1.00867	-0.141356	-0.180397	-0.722768	-0.531751	-0.0912874	0.695605	-1.15725	0.121376	-0.818703
		741	1.51248	-1.92673	-0.133787	-0.00161118	-0.141356	-0.180397	-0.722768	-0.531751	-0.0912874	-1.43628	0.379693	-0.344955	-0.48027
		743	0.0445517	0.523979	-0.0144531	-1.00867	-0.141356	-0.180397	2.10743	-0.531751	-0.0912874	0.695605	-0.387585	-0.0238867	-0.638771
		744	-0.430398	0.669206	-0.152512	-1.00867	-0.141356	-0.180397	1.90855	-0.531751	-0.0912874	0.695605	-0.663476	0.73912	-0.759297
		746	-0.0536334	3.18475	-1.41021	-1.00867	-0.141356	-0.180397	0.440008	-0.531751	-0.0912874	0.695605	1.61216	0.569291	0.563299
		749	-0.0148443	1.71064	-1.41021	0.420278	-0.141356	-0.180397	1.15619	-0.531751	-0.0912874	0.695605	2.05157	-0.566768	2.04036
		750	-0.260913	-1.24987	-1.41021	-1.00867	-0.141356	-0.180397	2.08314	-0.531751	-0.0912874	0.695605	-0.51919	-0.716535	-0.830509
		751	0.706392	-0.908743	-1.41021	-1.00867	-0.141356	-0.180397	-0.722768	-0.531751	-0.0912874	-1.43628	0.882255	-0.437801	2.04036
		752	-0.108181	-0.211234	-0.0134604	-0.499607	-0.141356	-0.180397	1.50349	-0.531751	-0.0912874	0.695605	-0.176752	-0.226841	-0.418974
		753	0.499113	-1.10983	0.949991	0.364454	-0.141356	-0.180397	-0.722768	-0.531751	-0.0912874	-1.43628	0.104068	-0.865123	-0.668178
		754	1.83492	-0.456305	1.17318	0.0336007	-0.141356	-0.180397	-0.722768	1.87885	-0.0912874	-1.43628	0.29428	-0.854647	-0.691373
		755	-0.521932	0.208888	0.238491	-0.222943	-0.141356	-0.180397	-0.722768	1.87885	-0.0912874	0.695605	-0.562964	-0.166937	-0.581746
		756	0.343653	0.0338371	0.28206	-0.174201	-0.141356	-0.180397	0.205165	1.87885	-0.0912874	0.695605	0.657932	-0.486625	-0.753309
		758	-0.0148443	-0.611086	1.2297	-0.356324	-0.141356	-0.180397	-0.722768	-0.531751	-0.0912874	-1.43628	0.121223	-0.682327	-0.697794
		759	-0.330006	-0.188955	-0.559698	-0.442218	-0.141356	-0.180397	-0.722768	1.87885	-0.0912874	0.695605	-0.125918	-0.310668	-0.798203
		760	-1.05533	1.07068	-1.15492	-0.286285	-0.141356	-0.180397	-0.722768	-0.531751	-0.0912874	0.695605	-0.921481	4.00715	0.645519
		761	-0.869885	0.473708	0.0715376	1.20693	-0.141356	-0.180397	-0.722768	-0.531751	-0.0912874	0.695605	0.484342	1.01288	-0.235294
		762	-0.521932	0.383938	0.199887	-0.559873	-0.141356	-0.180397	1.82888	1.87885	-0.0912874	0.695605	-0.530126	-0.230925	-0.684561
		763	0.520372	-0.154679	-1.41021	-0.0467287	-0.141356	-0.180397	1.53335	-0.531751	-0.0912874	0.695605	1.41703	-1.17643	1.70157
		764	-0.92453	1.11671	-0.587474	-0.194454	-0.141356	-0.180397	1.65982	-0.531751	-0.0912874	0.695605	-1.39178	1.48048	-0.560319
		765	0.208514	1.61959	-0.793896	-1.00867	4.66476	-0.180397	1.36581	-0.531751	-0.0912874	0.695605	1.46729	1.07253	2.04036
		766	-0.00486173	-1.32767	-0.558549	-0.363119	-0.141356	-0.180397	-0.722768	-0.531751	-0.0912874	-1.43628	-0.0249044	-0.541958	-0.718732
		767	0.926234	0.85074	-1.41021	-1.00867	-0.141356	-0.180397	-0.722768	1.87885	-0.0912874	0.695605	0.19333	0.520759	-0.841633
		768	-0.568259	0.963417	-0.879782	-0.0435755	-0.141356	-0.180397	0.631203	1.87885	-0.0912874	0.695605	0.828629	0.690097	-0.153451
		769	-0.6445	0.0338371	1.59221	0.362244	-0.141356	-0.180397	-0.722768	1.87885	-0.0912874	0.695605	-0.464645	-0.0867317	-0.785057
		770	-0.0148443	0.162822	-0.197167	-1.00867	-0.141356	-0.180397	-0.722768	1.87885	-0.0912874	-1.43628	0.376165	0.0826242	-0.328691
		772	1.83492	-0.456305	1.43501	0.139236	-0.141356	-0.180397	-0.722768	1.87885	-0.0912874	-1.43628	0.835698	-0.466335	-0.841633
		773	0.520372	-1.36657	-1.07538	-1.00867	-0.141356	-0.180397	1.26332	1.87885	-0.0912874	0.695605	0.396095	-0.71653	-0.725924
		774	-0.19182	-0.783066	0.20441	0.956754	-0.141356	-0.180397	-0.722768	-0.531751	-0.0912874	0.695605	0.305958	0.0346589	1.21523
		776	-0.406009	0.523979	-0.263036	1.36179	-0.141356	-0.180397	0.69603	1.87885	-0.0912874	0.695605	0.844689	0.461416	1.71621
		777	-0.19182	0.85074	-1.41021	0.200634	-0.141356	-0.180397	1.55169	-0.531751	-0.0912874	0.695605	0.916963	0.0235662	0.557364
		779	-0.00486173	-1.32767	-1.41021	-1.00867	-0.141356	-0.180397	1.49433	-0.531751	-0.0912874	0.695605	-0.0534791	-1.39673	-0.789982
		780	1.51248	-1.92673	-0.322063	0.695583	-0.141356	-0.180397	-0.722768	-0.531751	-0.0912874	0.695605	0.587114	-1.06683	-0.311453
		781	-0.0148443	-0.353117	-0.695412	-0.425636	-0.141356	-0.180397	1.62587	-0.531751	-0.0912874	0.695605	0.257319	-0.246601	1.60229
		782	-0.19182	-0.549665	-0.800178	-0.50732	-0.141356	-0.180397	1.846	-0.531751	-0.0912874	0.695605	-0.278699	-0.204299	-0.718732
		784	0.892413	0.976418	1.4837	0.977639	9.47088	2.98528	-0.722768	-0.531751	-0.0912874	0.695605	1.27787	0.134257	1.62532
		785	-0.790628	0.85074	-0.342887	0.434904	-0.141356	2.98528	-0.722768	1.87885	-0.0912874	0.695605	-0.377615	1.24327	-0.833325
		786	-0.785209	0.944101	0.224593	-0.325704	-0.141356	9.31662	1.78149	-0.531751	-0.0912874	0.695605	-1.29515	0.0183888	-0.800261
		787	-0.14157	0.702212	-1.41021	0.00660493	-0.141356	-0.180397	1.14552	-0.531751	-0.0912874	0.695605	0.779028	0.925601	1.79436
		788	0.839264	1.08414	0.182097	-1.00867	9.47088	-0.180397	-0.722768	-0.531751	-0.0912874	0.695605	0.540197	0.468489	1.0865
		789	-0.722582	0.702212	1.19056	1.75194	-0.141356	-0.180397	-0.722768	-0.531751	-0.0912874	-1.43628	0.748663	0.776234	-0.445349
		790	-0.513074	-0.0569299	2.17851	0.497614	-0.141356	-0.180397	-0.722768	1.87885	-0.0912874	0.695605	-0.308514	-0.43275	-0.841632
		791	0.926234	-1.19152	-0.154557	-0.065173	-0.141356	-0.180397	-0.722768	-0.531751	-0.0912874	-1.43628	0.520465	-1.07007	-0.5576
		792	-0.711211	0.625388	-1.41021	-0.124234	-0.141356	-0.180397	-0.722768	1.87885	-0.0912874	-1.43628	-1.03987	0.143143	-0.826567
		793	-0.278118	-0.925136	0.942364	0.332089	-0.141356	-0.180397	-0.722768	-0.531751	-0.0912874	-1.43628	-0.69718	-0.313078	-0.783417
		794	0.22274	-0.885179	-0.254582	-1.00867	-0.141356	-0.180397	1.24909	1.87885	-0.0912874	0.695605	-0.112789	-0.577401	-0.841633
		795	1.91552	-1.32767	0.409874	2.06845	-0.141356	-0.180397	-0.722768	-0.531751	-0.0912874	0.695605	0.956791	-0.656112	1.12295
		796	-0.454374	-0.456305	0.506203	0.901803	-0.141356	-0.180397	-0.722768	1.87885	-0.0912874	0.695605	0.0843009	-0.857305	-0.714697
		798	-0.777542	-0.188955	-0.116474	0.187415	-0.141356	2.98528	0.296709	-0.531751	-0.0912874	0.695605	-0.140005	0.526159	-0.370431
		799	-0.41717	1.54197	0.0196434	-0.547404	-0.141356	-0.180397	1.71672	-0.531751	-0.0912874	0.695605	0.303172	-0.560688	1.80515
		800	-0.650956	-0.045218	0.288335	-0.629037	-0.141356	-0.180397	1.42781	-0.531751	-0.0912874	0.695605	-2.22588	-0.201397	-0.841633
		803	-0.0318145	0.278908	1.45371	-0.403433	-0.141356	-0.180397	-0.722768	-0.531751	-0.0912874	0.695605	-0.583468	-0.489218	-0.634813
		804	-0.14157	0.702212	0.813038	-1.00867	-0.141356	-0.180397	-0.722768	-0.531751	-0.0912874	0.695605	-0.78029	-0.160753	0.312715
		806	-0.406009	-0.0641913	0.495497	0.408959	-0.141356	-0.180397	-0.722768	-0.531751	-0.0912874	-1.43628	-0.373799	-0.24521	-0.789571
		807	-0.450169	0.238063	0.0971823	0.303003	-0.141356	-0.180397	0.714039	-0.531751	-0.0912874	0.695605	-0.443142	-0.604383	-0.841633
		808	-0.682159	0.271003	-0.391342	0.164345	-0.141356	-0.180397	-0.722768	1.87885	-0.0912874	0.695605	0.192818	-0.120867	-0.759297
		809	0.360926	-0.129544	0.72916	2.03716	-0.141356	-0.180397	-0.722768	-0.531751	-0.0912874	0.695605	0.464542	-0.595942	0.184771
		810	-0.0996956	-0.611086	-0.494279	1.26745	-0.141356	-0.180397	-0.722768	-0.531751	-0.0912874	0.695605	1.24459	-0.405025	1.91372
		814	-0.0996956	1.1947	-1.02622	-1.00867	-0.141356	2.98528	1.47736	1.87885	-0.0912874	0.695605	0.331537	0.0672914	-0.786288
		815	0.0700071	0.162822	0.796568	0.64814	-0.141356	-0.180397	0.85818	-0.531751	-0.0912874	0.695605	0.13704	-0.105896	1.36463
		816	-0.00486173	0.466315	-1.41021	0.464342	-0.141356	-0.180397	-0.722768	1.87885	-0.0912874	-1.43628	0.342112	-0.080688	-0.762029
		818	0.0899721	-0.783066	0.815718	-0.363119	-0.141356	-0.180397	-0.722768	-0.531751	-0.0912874	-1.43628	-0.116145	-0.502037	-0.759297
		820	-0.968869	1.41902	0.307613	-0.123	-0.141356	-0.180397	-0.722768	-0.531751	-0.0912874	-1.43628	-0.77093	1.60615	-0.823378
		821	0.22274	0.646514	0.711181	-1.00867	-0.141356	-0.180397	-0.722768	1.87885	-0.0912874	-1.43628	0.416432	-0.597794	-0.725519
		822	0.520372	-0.908743	-1.41021	-1.00867	-0.141356	-0.180397	-0.722768	1.87885	-0.0912874	-1.43628	0.530046	0.394865	-0.78834
		824	0.184806	0.0338371	1.14601	0.123195	-0.141356	-0.180397	0.952528	-0.531751	-0.0912874	0.695605	-0.0981067	-0.614154	0.883126
		828	-0.68801	-0.119332	-0.438263	-0.360746	-0.141356	-0.180397	1.8838	-0.531751	-0.0912874	0.695605	-0.498714	-0.434513	-0.59544
		832	-0.560317	0.0338371	0.677758	0.347623	-0.141356	-0.180397	-0.722768	-0.531751	-0.0912874	0.695605	-0.405134	0.101166	-0.840801
		835	-0.0996956	-0.611086	-0.334388	-0.341763	-0.141356	-0.180397	1.59566	-0.531751	-0.0912874	0.695605	-0.122097	-0.515631	-0.800261
		840	-0.184547	0.420791	-1.41021	0.299516	-0.141356	-0.180397	-0.722768	-0.531751	-0.0912874	-1.43628	-0.047948	-0.27911	-0.772525
		843	-0.611144	0.85074	0.178396	-0.104669	-0.141356	-0.180397	0.696288	1.87885	-0.0912874	0.695605	-0.743155	0.656453	-0.706639
		845	-0.00486173	-0.110322	-1.01646	-0.223883	-0.141356	-0.180397	-0.722768	1.87885	-0.0912874	0.695605	0.8173	-0.000327693	-0.801138
		848	-0.521932	2.3095	-0.538428	1.66196	-0.141356	2.98528	-0.722768	-0.531751	-0.0912874	0.695605	1.41361	0.704125	1.36463
		851	-0.345027	-0.783066	-0.310269	-0.560658	-0.141356	-0.180397	-0.722768	-0.531751	-0.0912874	0.695605	-1.01186	-0.394217	-0.749932
		853	0.706392	-1.28578	-0.437801	0.50887	-0.141356	-0.180397	-0.722768	-0.531751	-0.0912874	0.695605	0.607028	-0.251578	0.436838
		856	0.637299	-0.129544	-0.0163845	0.230787	-0.141356	-0.180397	-0.722768	-0.531751	-0.0912874	0.695605	0.166542	-1.07008	2.04036
		857	-0.6445	-1.27321	-1.01176	-0.00161118	-0.141356	-0.180397	-0.722768	-0.531751	-0.0912874	-1.43628	-1.14127	0.441738	-0.841633
		858	-0.430398	-0.601532	1.21062	-0.276551	-0.141356	-0.180397	-0.722768	-0.531751	-0.0912874	-1.43628	-1.44093	-0.155891	-0.841633
		862	0.343653	-0.57884	2.62225	-1.00867	-0.141356	-0.180397	-0.722768	-0.531751	-0.0912874	-1.43628	-1.52034	-0.817546	-0.841633
		863	-0.184547	-0.211234	-0.569916	0.125151	-0.141356	-0.180397	1.71511	-0.531751	-0.0912874	0.695605	0.819433	-0.834234	1.82709
		865	-0.204382	0.925004	-1.41021	-0.431502	-0.141356	-0.180397	1.64226	1.87885	-0.0912874	0.695605	0.334454	0.220848	1.82709
		866	-0.717263	0.952853	-1.41021	4.02096	-0.141356	-0.180397	-0.722768	-0.531751	-0.0912874	0.695605	3.16958	1.02656	2.04036
		867	0.0899721	-1.05537	0.827347	-0.344999	-0.141356	-0.180397	-0.722768	1.87885	-0.0912874	-1.43628	-0.0231073	-0.187892	-0.779728
		869	0.360926	0.523979	0.655377	-0.0689328	-0.141356	-0.180397	0.423547	-0.531751	-0.0912874	0.695605	0.124594	-0.756821	-0.426116
		873	-0.335468	-1.13824	1.10531	-0.0171044	-0.141356	-0.180397	-0.722768	-0.531751	-0.0912874	-1.43628	-0.00357146	-0.490453	-0.841633
		874	0.208514	0.754634	0.397796	-0.296937	-0.141356	-0.180397	1.37386	-0.531751	-0.0912874	0.695605	-0.138475	-0.626411	0.557364
		875	0.926234	-2.00842	-0.565129	0.429985	-0.141356	-0.180397	-0.722768	-0.531751	-0.0912874	0.695605	0.317404	-1.15338	-0.74546
		876	0.706392	-2.03984	-0.650556	0.32613	-0.141356	-0.180397	-0.722768	-0.531751	-0.0912874	0.695605	0.182152	-1.18415	-0.812836
		877	0.343653	-0.57884	2.62225	-1.00867	-0.141356	-0.180397	-0.722768	-0.531751	-0.0912874	-1.43628	-1.52034	-1.06173	-0.841633
		878	-0.603997	0.287359	-0.00165536	-1.00867	-0.141356	-0.180397	1.46958	1.87885	-0.0912874	0.695605	-0.337436	0.304656	-0.0148434
		879	-0.0996956	0.420791	-1.05783	-1.00867	-0.141356	-0.180397	-0.722768	1.87885	-0.0912874	0.695605	0.0850482	0.00530484	-0.68336
		881	-0.902975	1.55094	-0.022641	-0.0212851	-0.141356	-0.180397	-0.722768	-0.531751	-0.0912874	-1.43628	-0.106984	1.42927	-0.370431
		882	-0.598702	-0.141214	0.0965042	-1.00867	-0.141356	-0.180397	-0.722768	1.87885	-0.0912874	-1.43628	-0.148279	-0.0896425	-0.476079
		883	-0.551105	0.523979	-1.41021	0.00128316	-0.141356	-0.180397	-0.722768	-0.531751	-0.0912874	-1.43628	-0.733276	-0.115179	-0.82181
		886	0.208514	-0.110322	2.55724	-0.219543	-0.141356	-0.180397	-0.722768	-0.531751	-0.0912874	-1.43628	-0.918053	-0.901686	-0.823875
		887	-0.330006	-0.411746	-0.471043	-1.00867	-0.141356	-0.180397	1.17363	-0.531751	-0.0912874	0.695605	-0.534602	-0.768785	-0.841633
		888	0.0899721	-0.238464	3.57996	-1.00867	-0.141356	-0.180397	-0.722768	-0.531751	-0.0912874	-1.43628	-2.1681	-0.292035	-0.841633
		892	-0.00486173	-0.510765	-0.4415	-1.00867	-0.141356	-0.180397	1.04281	-0.531751	-0.0912874	-1.43628	-0.00711819	-0.254135	-0.225244
		894	-0.650956	0.587223	0.0990873	0.259157	-0.141356	-0.180397	0.57257	1.87885	-0.0912874	0.695605	0.464006	0.786377	0.0861616
		897	1.19005	-0.946447	-1.41021	0.322338	-0.141356	-0.180397	-0.722768	-0.531751	-0.0912874	-1.43628	1.6689	-0.581603	1.80537
		899	0.0899721	-0.238464	3.57996	-1.00867	-0.141356	-0.180397	-0.722768	-0.531751	-0.0912874	-1.43628	-2.1681	-0.534652	-0.841633
		902	-0.450169	0.5666	-1.41021	0.0965846	-0.141356	-0.180397	-0.722768	1.87885	-0.0912874	-1.43628	-0.358624	0.0162435	-0.836057
		903	-0.0148443	0.420791	0.631475	-1.00867	-0.141356	-0.180397	-0.722768	-0.531751	-0.0912874	0.695605	-0.20793	0.0257828	-0.720509
		906	0.360926	-0.456305	-1.41021	0.510272	-0.141356	-0.180397	1.07075	-0.531751	-0.0912874	0.695605	1.23315	-0.468907	1.65964
		907	-0.0536334	0.85074	-0.247683	-0.45031	-0.141356	-0.180397	1.82575	-0.531751	-0.0912874	0.695605	0.333668	0.684281	1.67101
		909	-1.10116	-0.382321	0.192885	-0.788343	4.66476	-0.180397	1.72773	1.87885	-0.0912874	0.695605	-2.54259	0.578695	-0.638771
		911	-0.568259	0.625388	0.294967	-1.00867	-0.141356	-0.180397	1.88164	1.87885	-0.0912874	0.695605	-1.30946	-0.23988	-0.707042
		912	-0.68801	1.25919	1.18073	-1.00867	-0.141356	-0.180397	-0.722768	-0.531751	-0.0912874	0.695605	-1.18324	0.0588788	-0.693779
		913	-0.163418	0.779705	-1.41021	0.38261	-0.141356	-0.180397	1.23123	-0.531751	-0.0912874	0.695605	0.649306	1.4896	2.04036
		915	0.679818	0.383938	1.17484	-0.0253253	-0.141356	-0.180397	-0.722768	1.87885	-0.0912874	0.695605	0.412661	-0.526218	-0.59936
		918	-0.568259	1.30145	0.394454	-0.538912	-0.141356	-0.180397	1.073	-0.531751	-0.0912874	0.695605	-0.0718667	0.00617651	-0.59936
		919	-0.19182	1.08414	0.199468	-0.341082	-0.141356	-0.180397	0.237768	-0.531751	-0.0912874	0.695605	-0.104073	-0.644419	-0.841633
		921	-0.00486173	0.466315	-1.41021	-1.00867	-0.141356	-0.180397	-0.722768	1.87885	-0.0912874	-1.43628	0.537886	0.240132	-0.756852
		923	-0.471736	-0.601532	1.29693	-1.00867	-0.141356	-0.180397	-0.722768	-0.531751	-0.0912874	-1.43628	-1.05549	0.17464	-0.841633
		924	-0.68801	1.25919	-0.443271	0.578308	-0.141356	-0.180397	0.664424	1.87885	-0.0912874	0.695605	0.562108	0.675289	1.24051
		925	-0.357644	0.916092	0.359386	-1.00867	-0.141356	-0.180397	1.53086	-0.531751	-0.0912874	0.695605	-0.745279	-0.0691601	0.281096
		927	0.343653	-0.57884	1.49483	-0.265337	-0.141356	-0.180397	-0.722768	-0.531751	-0.0912874	-1.43628	0.0735535	-1.18283	-0.811969
		928	-0.930586	0.891585	-1.41021	3.83737	-0.141356	-0.180397	-0.722768	-0.531751	-0.0912874	0.695605	3.69528	1.21535	1.78309
		929	-0.450169	-0.57884	-0.673681	0.440232	-0.141356	-0.180397	-0.722768	-0.531751	-0.0912874	0.695605	0.650631	-0.307622	1.46133
		931	-0.392818	0.479421	-1.41021	0.131231	-0.141356	-0.180397	-0.722768	-0.531751	-0.0912874	-1.43628	-0.392749	-0.197373	-0.834819
		932	-0.675473	0.558989	-1.41021	-0.102083	-0.141356	-0.180397	-0.722768	-0.531751	-0.0912874	-1.43628	-1.07029	-0.0321632	-0.83751
		933	-0.818639	0.365014	-0.911844	-0.681473	-0.141356	-0.180397	2.16045	-0.531751	-0.0912874	0.695605	-1.40512	1.18772	0.0861616
		934	0.520372	1.08414	-1.41021	-0.00108419	-0.141356	-0.180397	1.19907	-0.531751	-0.0912874	-1.43628	0.678664	0.16912	2.04036
		935	-0.521932	-0.316264	-0.8995	0.288338	-0.141356	-0.180397	-0.722768	-0.531751	-0.0912874	-1.43628	0.0638288	0.768595	0.436838
		936	-0.471736	0.85074	-0.348118	0.288169	-0.141356	-0.180397	1.67402	-0.531751	-0.0912874	0.695605	0.2259	0.294009	1.69367
		937	-0.471736	-0.0569299	1.28551	-1.00867	-0.141356	-0.180397	1.01576	-0.531751	-0.0912874	0.695605	-0.712443	-0.135899	-0.638771
		939	-0.640395	0.0338371	-1.41021	2.45318	4.66476	-0.180397	-0.722768	-0.531751	-0.0912874	-1.43628	-0.526385	0.237885	-0.826567
		941	-0.19182	-0.549665	-0.800178	-0.50732	-0.141356	-0.180397	1.846	-0.531751	-0.0912874	0.695605	-0.278699	-0.204299	-0.61508
		944	-0.450169	0.5666	-1.41021	0.0965846	-0.141356	-0.180397	-0.722768	1.87885	-0.0912874	-1.43628	-0.358624	0.0162435	-0.836057
		945	-0.345027	0.442289	-0.303737	0.946425	-0.141356	-0.180397	0.636799	1.87885	-0.0912874	0.695605	0.82162	0.37828	1.93509
		947	-1.05585	0.442289	-1.41021	-0.188441	-0.141356	-0.180397	1.39159	-0.531751	-0.0912874	0.695605	-0.537599	2.28501	0.557364
		948	-0.00486173	-0.783066	-0.367743	0.940277	-0.141356	-0.180397	-0.722768	1.87885	-0.0912874	0.695605	1.00386	-0.0320433	1.16422
		950	-0.50646	0.0338371	0.276034	-0.485608	-0.141356	-0.180397	-0.722768	-0.531751	-0.0912874	0.695605	0.130287	-0.163425	-0.759297
		952	0.0700071	1.45267	0.596236	2.04431	-0.141356	2.98528	-0.722768	-0.531751	-0.0912874	0.695605	0.418392	-0.394942	0.353463
		953	0.0899721	1.66764	-0.862745	2.21908	-0.141356	-0.180397	-0.722768	-0.531751	-0.0912874	0.695605	1.77447	-0.354546	1.69367
		954	0.520372	-1.36657	-0.542934	0.395402	-0.141356	-0.180397	-0.722768	-0.531751	-0.0912874	-1.43628	0.371365	-1.36159	-0.738154
		956	0.208514	-0.398641	-0.457438	-0.345398	-0.141356	-0.180397	-0.722768	-0.531751	-0.0912874	0.695605	0.507533	-0.209961	1.76092
		957	-0.184547	-0.456305	-0.257261	-0.32992	-0.141356	-0.180397	-0.722768	-0.531751	-0.0912874	0.695605	-0.341997	-0.605184	-0.841633
		959	-0.560317	-0.141214	0.357949	0.516443	-0.141356	-0.180397	1.69111	-0.531751	-0.0912874	0.695605	0.166987	0.0549285	0.0190983
		960	-0.19182	-0.316264	1.5371	0.267996	-0.141356	-0.180397	-0.722768	1.87885	-0.0912874	-1.43628	0.310414	-0.408011	-0.802649
		961	0.0899721	-1.05537	0.827347	-0.344999	-0.141356	-0.180397	-0.722768	1.87885	-0.0912874	-1.43628	0.0165187	0.222186	-0.81676
		963	0.679818	2.13445	-0.640663	0.803482	-0.141356	-0.180397	0.849954	-0.531751	-0.0912874	0.695605	1.26497	0.176179	0.98056
		965	0.0445517	0.278908	0.397328	0.040643	-0.141356	-0.180397	1.86399	-0.531751	-0.0912874	0.695605	-0.169488	0.0953374	-0.551391
		968	-0.972734	0.660763	-0.0880787	-1.00867	-0.141356	-0.180397	1.7308	-0.531751	-0.0912874	0.695605	-2.23292	0.593934	2.04036
		970	1.51248	-0.456305	-1.41021	1.72846	-0.141356	-0.180397	-0.722768	-0.531751	-0.0912874	-1.43628	1.5524	-1.01188	2.04036
		971	0.520372	-1.01647	-0.315613	1.09072	-0.141356	-0.180397	-0.722768	-0.531751	-0.0912874	0.695605	0.746895	0.0581597	1.76092
		972	-0.513074	0.487672	-0.152398	0.497614	-0.141356	-0.180397	0.55941	1.87885	-0.0912874	0.695605	0.678906	0.617344	0.844225
		974	0.679818	1.08414	0.610632	0.686888	-0.141356	-0.180397	-0.722768	-0.531751	-0.0912874	0.695605	0.178304	-0.887406	1.0073
		976	-0.603997	0.287359	-0.00165536	-1.00867	-0.141356	-0.180397	1.46958	1.87885	-0.0912874	0.695605	-0.337436	0.304656	-0.0905051
		978	-0.00486173	1.12304	-1.41021	-1.00867	-0.141356	2.98528	-0.722768	1.87885	-0.0912874	0.695605	0.0881574	0.451311	-0.578272
		979	-0.532521	-0.0506701	-0.94072	-1.00867	-0.141356	-0.180397	-0.722768	-0.531751	-0.0912874	-1.43628	-0.799209	1.0026	-0.605641
		980	-0.00486173	0.0338371	-0.202881	1.58918	-0.141356	-0.180397	-0.722768	-0.531751	-0.0912874	0.695605	1.53038	-0.441967	1.36463
		981	-0.397598	0.238063	2.01825	-1.00867	-0.141356	-0.180397	-0.722768	-0.531751	-0.0912874	0.695605	-1.11576	-0.537718	-0.363754
		982	0.0700071	2.48455	-0.73375	1.66858	-0.141356	2.98528	-0.722768	-0.531751	-0.0912874	0.695605	1.03098	0.435829	2.00864
		984	-0.108181	0.278908	-0.164438	-1.00867	-0.141356	-0.180397	-0.722768	-0.531751	-0.0912874	0.695605	-0.15553	-0.198616	-0.392018
		985	1.19005	0.0338371	-1.41021	-1.00867	-0.141356	-0.180397	-0.722768	-0.531751	-0.0912874	-1.43628	0.395576	-0.189202	0.726715
		986	-0.471736	2.30301	-0.196626	-1.00867	-0.141356	-0.180397	1.58766	-0.531751	-0.0912874	0.695605	0.229404	0.27116	-0.0835696
		987	0.0700071	-0.353117	0.385945	-1.00867	4.66476	-0.180397	-0.722768	-0.531751	-0.0912874	0.695605	-0.476767	-0.071652	1.71913
		988	0.926234	-1.19152	-0.305585	0.642095	-0.141356	-0.180397	-0.722768	-0.531751	-0.0912874	-1.43628	0.644537	-1.33567	-0.206643
		990	-0.406009	-0.260248	-0.302542	-1.00867	-0.141356	-0.180397	2.01922	-0.531751	-0.0912874	0.695605	-0.476436	-0.839092	-0.224527
		991	0.706392	-0.531711	0.994748	0.0469115	-0.141356	-0.180397	-0.722768	-0.531751	-0.0912874	-1.43628	0.933752	-0.754269	0.473364
		993	-0.0318145	0.278908	0.867448	-1.00867	-0.141356	-0.180397	1.04328	-0.531751	-0.0912874	0.695605	-0.363585	-0.449051	-0.787929
		994	2.43372	1.25919	-1.41021	-1.00867	-0.141356	-0.180397	1.13185	-0.531751	-0.0912874	-1.43628	1.92193	-0.962616	1.94106
		995	-0.956666	0.774749	0.397939	-0.695623	-0.141356	-0.180397	0.97344	1.87885	-0.0912874	0.695605	-0.763795	0.738336	-0.596223
		1000	-0.544434	0.0338371	-1.12247	-0.334069	-0.141356	-0.180397	-0.722768	-0.531751	-0.0912874	0.695605	-1.26926	1.33588	-0.544418
		1001	-0.722582	0.85074	1.1376	-0.184473	-0.141356	-0.180397	-0.722768	-0.531751	-0.0912874	0.695605	-0.431211	0.19541	-0.672966
		1002	-0.0318145	0.0338371	2.04019	0.784837	-0.141356	-0.180397	-0.722768	-0.531751	-0.0912874	-1.43628	0.18334	-0.0766375	-0.741968
		1004	-0.554412	-0.601532	0.877554	-0.094511	-0.141356	-0.180397	-0.722768	-0.531751	-0.0912874	-1.43628	-0.000194545	-0.419238	-0.841633
		1007	-0.239885	0.85074	-0.205241	-0.0353784	-0.141356	-0.180397	1.74385	-0.531751	-0.0912874	0.695605	0.395418	1.33674	1.00463
		1009	0.343653	-1.49786	-0.916406	-1.00867	-0.141356	-0.180397	-0.722768	-0.531751	-0.0912874	-1.43628	-0.147898	-0.14471	-0.841632
		1010	-0.454374	-0.848418	-0.305585	-1.00867	-0.141356	-0.180397	1.60222	-0.531751	-0.0912874	0.695605	-0.52022	0.0157006	0.0527652
		1014	0.0445517	-0.456305	-0.318159	-0.481163	-0.141356	-0.180397	-0.722768	-0.531751	-0.0912874	-1.43628	-0.408577	0.330555	-0.606034
		1016	-0.532521	0.287359	-0.284008	-0.626682	4.66476	-0.180397	-0.722768	-0.531751	-0.0912874	0.695605	0.0404561	1.44256	0.344095
		1017	-0.278118	1.41902	-0.737301	-0.488019	-0.141356	-0.180397	1.58847	-0.531751	-0.0912874	0.695605	0.476812	0.687179	1.11257
		1021	-0.560317	1.08414	0.206626	0.134086	-0.141356	-0.180397	0.652612	-0.531751	-0.0912874	0.695605	-0.343726	0.13636	1.16422
		1026	-0.122727	0.150538	1.62557	0.168557	-0.141356	-0.180397	-0.722768	-0.531751	-0.0912874	-1.43628	0.0898901	-0.0180705	-0.758074
		1028	-0.108181	-0.211234	0.742368	-0.414763	-0.141356	-0.180397	1.42973	-0.531751	-0.0912874	0.695605	-0.243708	-0.841233	-0.717118
		1031	-0.267194	-1.08012	0.178624	0.919855	-0.141356	-0.180397	-0.722768	-0.531751	-0.0912874	-1.43628	-0.34254	-0.175337	-0.841632
		1032	0.208514	0.177996	0.198692	0.415938	-0.141356	-0.180397	-0.722768	-0.531751	-0.0912874	0.695605	0.901217	-0.626924	0.816413
		1034	0.208514	-0.975279	1.39853	0.85735	-0.141356	-0.180397	-0.722768	-0.531751	-0.0912874	-1.43628	0.0749091	-1.01958	-0.841633
		1036	-0.357644	-0.456305	-1.18103	-0.108916	-0.141356	-0.180397	-0.722768	-0.531751	-0.0912874	-1.43628	0.0040143	0.450863	-0.307795
		1037	-0.41717	-0.343195	-1.16926	0.307431	-0.141356	-0.180397	-0.722768	-0.531751	-0.0912874	-1.43628	0.27507	0.47563	-0.0835696
		1039	0.0445517	-0.456305	-0.695412	-0.00161118	-0.141356	-0.180397	-0.722768	-0.531751	-0.0912874	-1.43628	-0.468717	0.311701	-0.841612
		1040	-0.0148443	-0.611086	1.83835	-1.00867	-0.141356	-0.180397	-0.722768	-0.531751	-0.0912874	-1.43628	-1.79519	-0.0982608	-0.841633
		1044	-0.729048	0.898793	0.257917	-0.29983	-0.141356	-0.180397	1.21976	-0.531751	-0.0912874	0.695605	-0.394085	-0.2202	-0.333472
		1046	-0.406009	0.523979	0.192191	1.36179	-0.141356	-0.180397	0.589443	1.87885	-0.0912874	0.695605	0.85422	0.40532	0.527558
		1048	1.83492	2.48455	0.0298566	1.26367	-0.141356	-0.180397	-0.722768	1.87885	-0.0912874	-1.43628	1.21125	1.28574	1.71621
		1051	-0.122727	-0.783066	-0.0830011	-1.00867	-0.141356	-0.180397	1.70588	-0.531751	-0.0912874	0.695605	-0.731467	-0.53839	-0.638771
		1052	-0.122727	-0.0828633	-0.22692	-1.00867	-0.141356	-0.180397	2.0021	-0.531751	-0.0912874	0.695605	-0.470865	-0.790657	-0.445349
		1054	-0.357644	-0.0641913	-0.246519	-1.00867	-0.141356	-0.180397	2.05386	1.87885	-0.0912874	0.695605	-1.22618	-0.103436	-0.752373
		1055	-0.122727	0.150538	0.200046	-1.00867	-0.141356	-0.180397	1.87675	1.87885	-0.0912874	0.695605	-0.778234	-0.645975	-0.638771
		1056	-0.960318	1.0364	-0.227298	-0.711716	-0.141356	-0.180397	1.98113	-0.531751	-0.0912874	0.695605	-0.904956	1.29199	-0.816785
		1057	-0.397598	0.238063	3.01045	-0.316824	-0.141356	-0.180397	-0.722768	-0.531751	-0.0912874	-1.43628	-0.94202	-0.546091	-0.795735
		1059	-0.19182	0.150538	2.37388	0.303739	-0.141356	-0.180397	-0.722768	-0.531751	-0.0912874	0.695605	-0.61103	-0.837878	-0.841633
		1062	0.926234	0.442289	-0.235544	3.54246	-0.141356	-0.180397	-0.722768	-0.531751	-0.0912874	-1.43628	2.30758	-0.0688193	0.119292
		1063	-0.122727	-0.316264	-0.0896551	-0.532471	-0.141356	-0.180397	1.97328	1.87885	-0.0912874	0.695605	-0.612503	-0.512471	-0.759297
		1064	-0.19182	0.150538	0.35597	0.154352	-0.141356	2.98528	-0.722768	1.87885	-0.0912874	0.695605	-0.513604	-0.299603	-0.819018
		1065	-0.695101	0.405157	0.170469	-1.00867	-0.141356	-0.180397	1.7523	-0.531751	-0.0912874	0.695605	-1.48244	0.365294	-0.656231
		1067	-0.397598	0.0338371	-0.726298	-1.00867	-0.141356	-0.180397	-0.722768	-0.531751	-0.0912874	-1.43628	0.258957	-0.666781	-0.841633
		1069	-0.908462	1.34468	-0.231312	-0.196804	-0.141356	-0.180397	1.7242	-0.531751	-0.0912874	0.695605	-0.853553	1.4973	-0.560319
		1071	1.91552	1.39534	0.896389	2.30012	-0.141356	-0.180397	-0.722768	-0.531751	-0.0912874	-1.43628	1.83615	-0.494132	1.21523
		1072	-0.0996956	-0.611086	-0.535449	-1.00867	-0.141356	-0.180397	1.19329	-0.531751	-0.0912874	-1.43628	-0.0431858	-0.0294769	-0.162975
		1073	0.0899721	1.66764	-1.41021	-1.00867	-0.141356	-0.180397	1.09155	-0.531751	-0.0912874	0.695605	0.392129	-0.706565	1.14621
		1075	-0.521932	0.208888	1.01414	-0.180521	-0.141356	-0.180397	-0.722768	1.87885	-0.0912874	0.695605	-0.714922	-0.714324	-0.722771
		1076	0.706392	0.222353	2.73822	0.246961	-0.141356	-0.180397	-0.722768	-0.531751	-0.0912874	-1.43628	0.746979	-1.11489	-0.729929
		1077	0.360926	-0.783066	-0.230035	1.82903	-0.141356	-0.180397	-0.722768	-0.531751	-0.0912874	0.695605	1.0513	-0.524052	1.13589
		1079	-0.619752	0.112892	-0.993381	-0.236281	-0.141356	-0.180397	-0.722768	-0.531751	-0.0912874	-1.43628	-0.152955	0.936221	-0.333472
		1080	-0.267194	0.0338371	1.11718	-1.00867	-0.141356	-0.180397	-0.722768	-0.531751	-0.0912874	-1.43628	-0.731356	-0.433272	-0.841633
		1081	-0.14157	0.925004	-0.449875	-0.44528	-0.141356	-0.180397	1.8395	-0.531751	-0.0912874	0.695605	0.795787	1.2391	1.82709
		1082	-0.0996956	-0.611086	-0.637929	0.19118	-0.141356	-0.180397	-0.722768	-0.531751	-0.0912874	0.695605	0.894846	-0.307026	1.78972
		1084	0.101826	0.754634	-0.959543	0.932538	-0.141356	-0.180397	-0.722768	1.87885	-0.0912874	0.695605	1.30798	0.278661	1.55583
		1085	-0.813659	1.12304	-0.479228	0.136768	-0.141356	-0.180397	0.612944	1.87885	-0.0912874	0.695605	0.498381	0.866024	1.36463
		1086	-0.397598	-0.783066	1.0155	0.664491	-0.141356	-0.180397	-0.722768	-0.531751	-0.0912874	0.695605	-1.97717	0.293199	-0.841633
		1090	1.19005	-1.08012	0.285736	2.55946	-0.141356	-0.180397	-0.722768	-0.531751	-0.0912874	0.695605	1.23616	-1.14207	1.76092
		1092	1.51248	-1.92673	-0.322063	0.695583	-0.141356	-0.180397	-0.722768	-0.531751	-0.0912874	0.695605	0.826502	-0.714713	1.60229
		1095	-0.204382	1.81617	-0.551181	0.144518	-0.141356	2.98528	1.49516	-0.531751	-0.0912874	0.695605	0.934277	-0.253757	1.36463
		1097	-0.0536334	-0.549665	-1.41021	-0.508997	-0.141356	-0.180397	-0.722768	-0.531751	-0.0912874	-1.43628	-0.446203	0.189291	-0.713488
		1100	-0.19182	-1.01647	0.799345	-1.00867	-0.141356	-0.180397	-0.722768	-0.531751	-0.0912874	0.695605	-0.196986	-0.517148	-0.812609
		1104	-0.611144	0.85074	0.214859	-0.0839188	-0.141356	-0.180397	0.654155	1.87885	-0.0912874	0.695605	-0.537708	0.664926	-0.666583
		1105	-0.777542	-0.337482	-0.454771	-1.00867	-0.141356	-0.180397	1.78348	-0.531751	-0.0912874	0.695605	-0.742726	0.139507	-0.445349
		1107	-0.461815	-0.343195	0.552093	-1.00867	-0.141356	-0.180397	-0.722768	-0.531751	-0.0912874	-1.43628	-1.20338	0.193332	-0.841633
		1108	1.51248	-1.87227	-1.41021	3.59957	-0.141356	-0.180397	-0.722768	1.87885	-0.0912874	-1.43628	1.9112	-0.504262	-0.370431
		1112	-0.184547	0.0338371	0.77711	0.597996	-0.141356	-0.180397	-0.722768	-0.531751	-0.0912874	-1.43628	0.169565	-0.637937	-0.203076
		1118	0.499113	0.197218	0.160772	-0.311475	-0.141356	2.98528	-0.722768	-0.531751	-0.0912874	0.695605	0.204766	-0.921821	-0.772648
		1120	0.0445517	-0.456305	-0.630173	-0.481163	-0.141356	-0.180397	-0.722768	-0.531751	-0.0912874	-1.43628	-0.472245	0.234795	-0.715504
		1121	-0.461815	0.410869	0.543292	0.182203	-0.141356	-0.180397	-0.722768	-0.531751	-0.0912874	0.695605	-0.885994	0.223824	-0.759297
		1122	0.0445517	0.0338371	0.117776	-0.52174	-0.141356	-0.180397	-0.722768	-0.531751	-0.0912874	0.695605	-0.14916	0.0812307	0.844225
		1124	1.91552	0.85074	-1.41021	-1.00867	-0.141356	-0.180397	1.68535	1.87885	-0.0912874	-1.43628	1.13834	0.15601	1.80823
		1125	0.520372	0.0338371	1.83598	0.12381	-0.141356	-0.180397	-0.722768	-0.531751	-0.0912874	-1.43628	0.548906	-0.787459	-0.830683
		1128	0.0700071	-0.0951476	1.11892	0.18175	-0.141356	-0.180397	-0.722768	-0.531751	-0.0912874	0.695605	-0.429174	0.60723	-0.837477
		1129	1.19005	-1.52571	-0.458557	-0.163586	-0.141356	-0.180397	-0.722768	-0.531751	-0.0912874	0.695605	0.712785	-0.67521	1.71621
		1130	-0.406009	0.131865	1.00536	-0.502672	-0.141356	-0.180397	-0.722768	-0.531751	-0.0912874	0.695605	-0.657225	-0.222796	-0.799026
		1131	0.0700071	2.22658	-0.889378	1.60071	-0.141356	-0.180397	-0.722768	-0.531751	-0.0912874	0.695605	1.55397	0.698877	1.95636
		1132	-0.292456	-0.783066	-0.625389	-0.577442	-0.141356	-0.180397	-0.722768	-0.531751	-0.0912874	-1.43628	-0.777958	0.545819	-0.759297
		1133	-0.267194	-0.188955	-0.535883	-0.517891	-0.141356	-0.180397	1.952	-0.531751	-0.0912874	0.695605	-0.420702	-0.583927	0.645519
		1134	-0.454374	-0.848418	-0.151253	-0.134164	-0.141356	-0.180397	-0.722768	-0.531751	-0.0912874	0.695605	0.0492397	-0.36971	-0.678559
		1136	-0.598702	0.558989	-0.0746935	0.15253	-0.141356	-0.180397	-0.722768	-0.531751	-0.0912874	0.695605	-0.330107	-0.165389	0.899296
		1137	1.07843	1.35345	-1.41021	-0.144625	-0.141356	-0.180397	-0.722768	-0.531751	-0.0912874	0.695605	0.987406	-0.412496	1.82709
		1138	-0.19182	0.150538	1.45063	1.46771	-0.141356	-0.180397	-0.722768	1.87885	-0.0912874	0.695605	0.522715	-0.690014	-0.792036
		1140	-0.0148443	-0.611086	-0.411763	0.101871	-0.141356	-0.180397	-0.722768	-0.531751	-0.0912874	0.695605	0.0914166	-0.141287	-0.167569
		1141	0.22274	0.523979	-1.41021	-1.00867	-0.141356	-0.180397	-0.722768	1.87885	-0.0912874	-1.43628	-0.126154	0.785109	-0.825283
		1144	1.51248	-0.456305	0.427735	2.19127	-0.141356	-0.180397	-0.722768	-0.531751	-0.0912874	0.695605	1.69388	-1.07658	2.04036
		1145	-0.560317	-0.141214	-0.0181376	-1.00867	4.66476	-0.180397	1.58081	-0.531751	-0.0912874	0.695605	-0.740206	0.143147	-0.784483
		1146	-0.267194	-0.411746	0.700796	-0.397383	-0.141356	-0.180397	-0.722768	-0.531751	-0.0912874	0.695605	-0.51488	-0.153584	-0.333472
		1147	-0.560317	-0.841416	0.139057	-1.00867	-0.141356	-0.180397	1.57736	-0.531751	-0.0912874	0.695605	-1.30455	-0.315436	-0.836646
		1148	-0.260913	0.916092	-0.447035	-0.134164	-0.141356	-0.180397	2.04797	-0.531751	-0.0912874	0.695605	-0.180033	1.40964	1.24051
		1149	-0.108181	0.278908	-0.28365	-0.376821	-0.141356	-0.180397	-0.722768	-0.531751	-0.0912874	0.695605	-0.111989	-0.00834554	-0.348955
		1151	-0.392818	0.14039	0.810235	-1.00867	-0.141356	-0.180397	0.630174	-0.531751	-0.0912874	0.695605	-0.616368	-0.634796	-0.841633
		1152	-0.50646	-0.343195	-0.798448	-1.00867	-0.141356	-0.180397	1.70343	1.87885	-0.0912874	0.695605	-0.668574	-0.200678	-0.841633
		1154	1.14608	0.0338371	0.789163	-1.00867	-0.141356	-0.180397	-0.722768	-0.531751	-0.0912874	0.695605	0.772511	-1.24898	0.309564
		1155	0.520372	0.73404	1.46595	0.137511	-0.141356	-0.180397	-0.722768	-0.531751	-0.0912874	-1.43628	0.175623	-0.470249	-0.749647
		1158	-0.278118	-0.498926	0.873932	-0.492229	-0.141356	-0.180397	-0.722768	-0.531751	-0.0912874	-1.43628	-0.199554	0.0227195	-0.796146
		1159	-0.278118	-0.498926	0.873932	-0.492229	-0.141356	-0.180397	-0.722768	-0.531751	-0.0912874	-1.43628	-0.199554	0.0227195	-0.747086
		1161	0.22274	0.85074	-1.41021	-1.00867	-0.141356	-0.180397	-0.722768	-0.531751	-0.0912874	-1.43628	1.56967	0.00597319	0.557364
		1163	-0.406009	0.131865	0.668268	0.475358	-0.141356	-0.180397	1.35314	1.87885	-0.0912874	0.695605	0.121501	-0.768691	-0.607213
		1165	0.22274	1.25919	0.577338	-1.00867	-0.141356	-0.180397	-0.722768	1.87885	-0.0912874	0.695605	-0.349038	0.170407	-0.841633
		1166	-0.809595	0.103857	0.290868	-0.643472	-0.141356	-0.180397	1.47949	-0.531751	-0.0912874	0.695605	-0.523597	0.00309969	-0.50627
		1167	-0.513074	-0.0569299	-0.445571	-1.00867	-0.141356	-0.180397	2.00861	1.87885	-0.0912874	0.695605	-0.348003	-0.641739	-0.540935
		1168	-0.397598	0.0338371	0.182701	0.47251	-0.141356	-0.180397	-0.722768	1.87885	-0.0912874	0.695605	0.263984	-0.573709	-0.800261
		1170	0.208514	0.466315	-0.938914	-0.256793	-0.141356	-0.180397	0.342219	-0.531751	-0.0912874	0.695605	0.794001	-0.545688	0.926561
		1171	-0.184547	0.162822	-1.41021	-1.00867	-0.141356	-0.180397	-0.722768	1.87885	-0.0912874	-1.43628	0.133073	0.639549	-0.841633
		1175	-0.869885	0.473708	0.0715376	1.20693	-0.141356	-0.180397	-0.722768	-0.531751	-0.0912874	0.695605	0.484342	1.01288	0.0861616
		1176	-0.68801	0.340176	0.0576264	1.5636	-0.141356	-0.180397	0.712859	-0.531751	-0.0912874	0.695605	0.980055	0.90853	-0.370431
		1177	-0.108181	-1.43659	0.288535	-0.00161118	-0.141356	-0.180397	-0.722768	-0.531751	-0.0912874	-1.43628	-0.670342	-0.442643	-0.802938
		1180	-0.267194	0.479421	0.274011	-1.00867	-0.141356	-0.180397	-0.722768	1.87885	-0.0912874	-1.43628	-0.464033	0.189099	-0.841632
		1182	-0.0148443	-0.611086	0.206228	-1.00867	-0.141356	-0.180397	1.60447	-0.531751	-0.0912874	0.695605	-0.386439	-0.257807	-0.498606
		1183	-0.6445	0.68736	-0.946236	-0.0677801	-0.141356	-0.180397	0.519212	1.87885	-0.0912874	0.695605	0.849117	0.869397	-0.260525
		1184	-0.19182	1.08414	-1.41021	0.280827	-0.141356	-0.180397	1.5297	-0.531751	-0.0912874	0.695605	1.67511	0.297382	1.97752
		1185	4.09196	0.85074	-1.41021	3.18741	-0.141356	-0.180397	-0.722768	-0.531751	-0.0912874	-1.43628	2.31389	-0.644853	1.99857
		1188	-0.204382	-0.85733	0.815876	0.947543	-0.141356	-0.180397	-0.722768	-0.531751	-0.0912874	0.695605	-0.242463	-0.128734	0.0359658
		1189	-0.267194	0.479421	0.466856	1.11178	-0.141356	-0.180397	-0.722768	-0.531751	-0.0912874	0.695605	0.0723019	-0.543483	-0.260525
		1192	-0.212548	1.70032	-0.360862	-1.00867	-0.141356	-0.180397	2.20962	-0.531751	-0.0912874	0.695605	-0.00551602	1.67954	0.723292
		1193	0.0154598	1.08414	-0.138696	0.0594956	-0.141356	-0.180397	1.91358	-0.531751	-0.0912874	0.695605	0.378273	1.41628	1.24051
		1194	0.208514	0.177996	0.198692	0.415938	-0.141356	-0.180397	-0.722768	-0.531751	-0.0912874	0.695605	0.667555	0.0799467	0.0761708
		1197	0.22274	-0.272502	-1.41021	0.524512	-0.141356	-0.180397	-0.722768	-0.531751	-0.0912874	0.695605	0.977201	-1.05743	0.527558
		1198	-0.50646	-0.154679	-0.812334	0.647912	-0.141356	-0.180397	-0.722768	-0.531751	-0.0912874	0.695605	0.116782	-0.566286	0.527558
		1200	0.22274	-0.456305	-1.41021	2.20957	-0.141356	-0.180397	-0.722768	-0.531751	-0.0912874	0.695605	1.47467	-0.921751	2.04036
		1201	-0.722582	0.405157	0.138386	1.5571	-0.141356	-0.180397	0.766392	-0.531751	-0.0912874	0.695605	0.616406	0.868703	0.899296
		1203	-0.14157	-0.634538	-0.307392	-0.0990306	-0.141356	-0.180397	-0.722768	-0.531751	-0.0912874	-1.43628	-0.740503	0.432475	-0.783827
		1208	-0.577789	1.50426	0.0911266	-0.223404	-0.141356	-0.180397	1.90317	-0.531751	-0.0912874	0.695605	-0.538966	-0.478426	-0.513949
		1209	-0.220768	-0.712031	-1.20775	-1.00867	-0.141356	-0.180397	-0.722768	-0.531751	-0.0912874	-1.43628	-0.666488	0.20668	-0.746639
		1211	-0.357644	-0.456305	-1.20911	-1.00867	-0.141356	-0.180397	-0.722768	-0.531751	-0.0912874	-1.43628	-0.805849	0.245523	-0.841633
		1212	-0.220768	1.20592	0.260516	-0.525108	-0.141356	-0.180397	1.84662	-0.531751	-0.0912874	0.695605	-0.595049	-0.607775	-0.638771
		1213	0.0445517	-0.456305	-0.695412	-0.00161118	-0.141356	-0.180397	-0.722768	-0.531751	-0.0912874	-1.43628	-0.468717	0.311701	-0.841467
		1215	-0.964408	0.74182	0.188589	-0.253376	9.47088	-0.180397	-0.722768	-0.531751	-0.0912874	0.695605	-0.712434	2.8064	1.06026
		1216	-0.568259	-0.219685	0.845772	-1.00867	-0.141356	-0.180397	0.820437	1.87885	-0.0912874	0.695605	-0.647194	-0.531062	-0.771544
		1217	1.19005	-1.97129	-0.458557	0.551485	-0.141356	-0.180397	-0.722768	-0.531751	-0.0912874	-1.43628	0.419238	-0.866499	-0.48477
		1219	0.0445517	-0.946447	0.626247	-1.00867	-0.141356	-0.180397	-0.722768	-0.531751	-0.0912874	-1.43628	-1.34525	-0.81858	-0.841633
		1220	0.679818	1.43424	-0.469897	1.03173	-0.141356	-0.180397	0.545341	-0.531751	-0.0912874	-1.43628	1.83111	0.319255	1.84892
		1222	-0.780775	1.18711	-0.11809	1.82524	-0.141356	-0.180397	0.641281	-0.531751	-0.0912874	0.695605	1.31776	0.428623	-0.494779
		1223	0.679818	2.83465	-0.640663	-1.00867	-0.141356	-0.180397	0.748383	-0.531751	-0.0912874	0.695605	1.20267	-0.5519	2.04036
		1224	-0.335468	-0.498926	0.432299	0.0152293	-0.141356	-0.180397	1.48833	-0.531751	-0.0912874	0.695605	-0.154314	-0.380434	-0.820192
		1225	0.208514	0.177996	0.342674	1.35716	-0.141356	2.98528	-0.722768	-0.531751	-0.0912874	0.695605	0.0118016	-0.401439	-0.378978
		1227	-0.909047	0.976418	-1.41021	3.42742	-0.141356	-0.180397	-0.722768	-0.531751	-0.0912874	0.695605	3.32952	1.23868	1.93509
		1228	-0.14157	-0.634538	-1.20787	-0.534075	-0.141356	-0.180397	-0.722768	-0.531751	-0.0912874	-1.43628	-0.598253	0.19194	-0.707042
		1229	-0.0536334	-0.549665	-1.19165	-0.508997	-0.141356	-0.180397	-0.722768	-0.531751	-0.0912874	-1.43628	-0.436908	0.172659	-0.611144
		1230	-0.122727	0.383938	0.806353	-0.452706	-0.141356	-0.180397	0.544806	-0.531751	-0.0912874	0.695605	-0.281921	0.353998	-0.260525
		1232	1.83492	0.523979	0.964113	0.953803	-0.141356	-0.180397	-0.722768	1.87885	-0.0912874	-1.43628	0.759128	-0.922561	0.557364
		1234	-0.471736	0.669206	-0.0964221	-0.586939	-0.141356	-0.180397	2.0281	1.87885	-0.0912874	0.695605	-0.569219	-0.609047	-0.560319
		1235	-0.0318145	0.0338371	0.0278425	-1.00867	-0.141356	-0.180397	1.94567	1.87885	-0.0912874	0.695605	-0.415314	-0.780769	-0.407721
		1237	1.19005	-1.97129	-0.310522	-0.0990306	-0.141356	-0.180397	-0.722768	-0.531751	-0.0912874	-1.43628	0.31744	-0.984113	-0.385307
		1238	0.892413	2.86158	-0.461549	0.0554243	-0.141356	-0.180397	0.714526	-0.531751	-0.0912874	0.695605	1.3862	0.272777	1.13847
		1240	0.360926	-0.783066	-0.230035	1.82903	-0.141356	-0.180397	-0.722768	-0.531751	-0.0912874	0.695605	1.0513	-0.664253	1.82709
		1241	-0.0148443	-0.611086	-0.01974	-1.00867	-0.141356	-0.180397	1.58708	-0.531751	-0.0912874	0.695605	0.0121	-0.707836	-0.0148434
		1242	-0.406009	0.327922	0.467758	-1.00867	-0.141356	-0.180397	-0.722768	-0.531751	-0.0912874	0.695605	-0.259753	-0.162279	-0.548678
		1243	1.19005	-0.634538	0.761051	0.0921193	-0.141356	-0.180397	-0.722768	-0.531751	-0.0912874	-1.43628	0.651866	-1.20518	0.560333
		1244	0.926234	0.0338371	-1.41021	-1.00867	-0.141356	-0.180397	-0.722768	-0.531751	-0.0912874	-1.43628	-0.579209	0.691988	-0.773588
		1247	-0.750062	0.999268	-1.41021	4.10438	-0.141356	-0.180397	-0.722768	-0.531751	-0.0912874	0.695605	3.37889	1.00932	2.01952
		1249	-0.750062	1.1478	-0.125919	1.48491	-0.141356	2.98528	1.29231	-0.531751	-0.0912874	0.695605	0.612584	0.206427	0.65133
		1250	-0.454374	-0.260248	-0.075253	-0.0813725	-0.141356	-0.180397	-0.722768	-0.531751	-0.0912874	0.695605	0.211589	-0.121302	-0.779728
		1251	-0.184547	-1.43659	-1.41021	-1.00867	-0.141356	-0.180397	1.56204	-0.531751	-0.0912874	0.695605	-0.447995	-1.45641	-0.830214
		1252	0.343653	2.48455	-0.658826	2.09965	-0.141356	-0.180397	-0.722768	-0.531751	-0.0912874	0.695605	1.82433	-0.240294	1.71621
		1256	-0.220768	0.779705	1.19849	-1.00867	-0.141356	-0.180397	-0.722768	-0.531751	-0.0912874	0.695605	-0.953375	-0.109681	-0.638771
		1257	-0.292456	0.85074	1.31618	-0.490938	-0.141356	-0.180397	-0.722768	-0.531751	-0.0912874	0.695605	-0.660823	-0.0451578	-0.445349
		1260	1.91552	-0.238464	1.00445	0.420148	-0.141356	-0.180397	-0.722768	-0.531751	-0.0912874	-1.43628	1.37595	-0.799462	1.09694
		1265	-1.36641	-0.0526585	-1.34277	-0.285653	-0.141356	-0.180397	0.673088	-0.531751	-0.0912874	0.695605	-2.46111	2.58745	-0.841633
		1268	0.343653	-1.49786	0.268999	-0.396346	-0.141356	-0.180397	-0.722768	-0.531751	-0.0912874	-1.43628	-0.319735	-0.594896	-0.746679
		1269	-0.560317	0.0338371	1.64146	0.348771	-0.141356	-0.180397	-0.722768	1.87885	-0.0912874	0.695605	-0.434287	-0.648539	-0.825035
		1270	0.208514	0.754634	-0.694617	2.62643	-0.141356	-0.180397	-0.722768	1.87885	-0.0912874	0.695605	2.0278	0.340745	0.760225
		1271	0.499113	-0.783066	0.993963	0.303696	-0.141356	-0.180397	-0.722768	-0.531751	-0.0912874	0.695605	-0.0310547	-1.39318	-0.771135
		1272	0.926234	-1.19152	-1.41021	1.59935	-0.141356	-0.180397	-0.722768	-0.531751	-0.0912874	0.695605	1.16189	-1.28222	1.97752
		1273	-0.744566	-0.203328	-0.407685	1.91386	-0.141356	-0.180397	-0.722768	-0.531751	10.9443	0.695605	0.151284	0.387011	2.04036
		1274	-0.204382	0.0338371	1.3581	-0.469557	-0.141356	-0.180397	-0.722768	-0.531751	-0.0912874	0.695605	-0.679885	0.201546	-0.691733
		1275	0.706392	-0.154679	1.73837	-1.00867	-0.141356	-0.180397	-0.722768	-0.531751	-0.0912874	-1.43628	0.454655	-0.727944	0.365921
		1276	-0.345027	0.0338371	-0.783998	-0.532253	4.66476	-0.180397	-0.722768	-0.531751	-0.0912874	0.695605	0.756235	1.10205	1.93509
		1277	-0.204382	0.925004	-0.197286	-1.00867	-0.141356	-0.180397	-0.722768	-0.531751	-0.0912874	0.695605	-0.543418	0.431117	-0.635605
		1278	-0.220768	-0.712031	-0.565002	-0.556784	-0.141356	-0.180397	-0.722768	-0.531751	-0.0912874	-1.43628	-0.596	0.575111	-0.747086
		1279	1.51248	-1.87227	-1.41021	2.56337	-0.141356	-0.180397	-0.722768	-0.531751	-0.0912874	0.695605	2.00344	-1.54621	1.87063
		1281	-0.0318145	0.278908	1.31691	0.155333	-0.141356	-0.180397	-0.722768	-0.531751	-0.0912874	0.695605	-0.16784	-0.0721752	-0.678559
		1282	0.706392	0.442289	-1.41021	0.158287	-0.141356	-0.180397	-0.722768	1.87885	-0.0912874	-1.43628	1.44124	0.143096	1.96674
		1283	-0.68801	0.340176	0.0576264	1.5636	-0.141356	-0.180397	0.788986	-0.531751	-0.0912874	0.695605	0.981442	0.833711	0.754565
		1284	0.520372	1.08414	-1.41021	-0.00108419	-0.141356	-0.180397	1.11966	-0.531751	-0.0912874	-1.43628	0.678664	0.139829	1.5371
		1285	-0.00486173	0.0338371	-0.743292	0.179143	-0.141356	-0.180397	-0.722768	-0.531751	-0.0912874	0.695605	0.510818	-0.307171	1.11257
		1287	0.23971	1.71064	-0.533763	-1.00867	-0.141356	-0.180397	-0.722768	-0.531751	-0.0912874	-1.43628	-0.957298	2.63374	-0.802831
		1288	0.706392	-0.154679	1.73837	-1.00867	-0.141356	-0.180397	-0.722768	-0.531751	-0.0912874	-1.43628	0.454655	-0.743734	-0.329794
		1291	0.679818	0.0338371	0.372842	-1.00867	-0.141356	-0.180397	1.27605	-0.531751	-0.0912874	0.695605	0.584767	-0.783245	1.97752
		1294	0.926234	0.0338371	-1.41021	-1.00867	-0.141356	-0.180397	-0.722768	-0.531751	-0.0912874	-1.43628	-0.579209	0.691988	-0.769909
		1295	-0.0318145	0.0338371	0.0278425	-1.00867	-0.141356	-0.180397	1.93187	1.87885	-0.0912874	0.695605	-0.516728	-0.340214	-0.48332
		1297	-0.785209	0.664019	0.177131	0.580377	-0.141356	-0.180397	0.443845	1.87885	-0.0912874	0.695605	0.680449	1.05847	-0.759297
		1300	-0.278118	0.353495	-0.268863	0.0691187	-0.141356	-0.180397	0.76744	1.87885	-0.0912874	0.695605	0.517044	0.190075	0.557364
		1301	0.0445517	1.01412	-0.0866721	-1.00867	-0.141356	-0.180397	1.98705	-0.531751	-0.0912874	0.695605	-0.190112	0.166838	-0.260525
		1304	-0.722582	0.405157	0.0943371	1.86324	-0.141356	-0.180397	0.626924	-0.531751	-0.0912874	0.695605	1.30059	0.959816	0.552015
		1305	-0.754911	1.04295	-0.743923	0.507074	-0.141356	-0.180397	1.45496	1.87885	-0.0912874	0.695605	0.613209	0.777946	0.844225
		1306	1.19005	-0.946447	-1.41021	2.72758	-0.141356	-0.180397	-0.722768	1.87885	-0.0912874	-1.43628	1.84678	-0.710621	-0.188837
		1310	1.51248	-1.92673	-0.133787	-0.00161118	-0.141356	-0.180397	-0.722768	-0.531751	-0.0912874	-1.43628	0.447486	-1.14926	-0.296839
		1311	-0.292456	0.646514	0.385835	-0.489094	-0.141356	-0.180397	-0.722768	-0.531751	-0.0912874	0.695605	-0.315329	0.126779	-0.59936
		1314	-1.00049	0.711693	0.214328	-1.00867	-0.141356	-0.180397	1.90388	-0.531751	-0.0912874	0.695605	-2.89695	2.37168	-0.0148434
		1315	0.706392	-0.531711	0.00405127	-0.0978052	-0.141356	-0.180397	-0.722768	-0.531751	-0.0912874	-1.43628	0.822204	-1.01807	1.11257
		1319	-0.746516	-1.34469	0.643702	-0.749716	-0.141356	-0.180397	-0.722768	1.87885	-0.0912874	-1.43628	-1.79849	0.405366	-0.82044
		1320	1.91552	-0.783066	1.75419	1.51317	-0.141356	-0.180397	-0.722768	-0.531751	-0.0912874	-1.43628	0.291454	-1.21705	-0.630069
		1323	-0.598702	0.383938	1.85864	-1.00867	-0.141356	-0.180397	0.39152	-0.531751	-0.0912874	0.695605	-1.47348	-0.456647	-0.841633
		1324	-1.08597	0.562421	-0.608876	-0.242809	-0.141356	-0.180397	0.695808	1.87885	-0.0912874	0.695605	-1.06797	1.2261	-0.792036
		1325	-0.650956	-0.677659	-1.24613	-1.00867	-0.141356	-0.180397	-0.722768	-0.531751	-0.0912874	-1.43628	-1.1599	0.369449	-0.7695
		1326	-0.0536334	-0.549665	-1.17305	-1.00867	-0.141356	-0.180397	-0.722768	-0.531751	-0.0912874	-1.43628	-0.43957	0.109845	-0.17323
		1328	0.839264	-0.666366	1.02081	-0.304098	-0.141356	-0.180397	-0.722768	-0.531751	-0.0912874	-1.43628	-0.0776295	-0.769399	-0.739452
		1329	-0.184547	-1.43659	-0.982552	-1.00867	4.66476	-0.180397	-0.722768	-0.531751	-0.0912874	0.695605	0.0189994	-0.811471	-0.798615
		1330	-0.0318145	-0.456305	1.29197	0.040643	-0.141356	-0.180397	-0.722768	-0.531751	-0.0912874	0.695605	-0.418722	-0.865426	-0.81457
		1333	-0.521932	1.78434	-0.552122	-0.108588	-0.141356	2.98528	1.49545	-0.531751	-0.0912874	0.695605	0.314914	0.0931085	-0.521641
		1336	-0.598702	-0.141214	0.00533037	-0.53357	-0.141356	-0.180397	-0.722768	-0.531751	-0.0912874	0.695605	-0.169815	-0.0696833	-0.829178
		1337	0.22274	-0.57884	-0.0604256	-1.00867	-0.141356	-0.180397	-0.722768	-0.531751	-0.0912874	-1.43628	0.148909	-0.89877	-0.841632
		1338	2.43372	-2.41687	-1.41021	-1.00867	-0.141356	-0.180397	-0.722768	-0.531751	-0.0912874	-1.43628	1.17654	-1.4455	1.51499
		1339	0.839264	1.08414	0.182097	-1.00867	9.47088	-0.180397	-0.722768	-0.531751	-0.0912874	0.695605	0.540197	0.468489	1.97118
		1341	-0.108181	-0.211234	1.57736	0.820924	-0.141356	-0.180397	-0.722768	-0.531751	-0.0912874	-1.43628	-0.479187	-0.773717	-0.771544
		1342	7.96118	-4.05068	-1.41021	2.80008	-0.141356	-0.180397	-0.722768	-0.531751	-0.0912874	-1.43628	1.92625	-2.01353	1.90041
		1343	-0.108181	0.523979	-0.932636	1.4186	-0.141356	-0.180397	0.685527	1.87885	-0.0912874	0.695605	1.55553	0.532003	1.73862
		1344	-1.23937	0.509348	-0.338528	-1.00867	9.47088	-0.180397	-0.722768	-0.531751	-0.0912874	0.695605	-1.00539	1.57295	0.899296
		1345	0.208514	1.61959	-1.41021	-1.00867	-0.141356	-0.180397	1.87856	-0.531751	-0.0912874	0.695605	1.67247	-1.10588	2.04036
		1346	-0.278118	0.14039	-0.0294182	-1.00867	-0.141356	-0.180397	1.61979	-0.531751	-0.0912874	0.695605	-0.301456	-0.688843	1.60229
		1348	-0.513074	-0.238464	-0.494009	-1.00867	-0.141356	-0.180397	2.12258	-0.531751	-0.0912874	0.695605	-0.641135	-0.490559	-0.837477
		1349	-0.00486173	-0.783066	-0.257429	0.355593	-0.141356	-0.180397	-0.722768	1.87885	-0.0912874	0.695605	0.572508	-0.692586	-0.678559
		1350	-0.603997	0.287359	0.12639	-0.565243	-0.141356	-0.180397	-0.722768	-0.531751	-0.0912874	0.695605	0.13054	0.0745761	1.13847
		1353	-0.461815	1.16493	-0.410855	0.989557	-0.141356	-0.180397	0.576424	1.87885	-0.0912874	0.695605	0.868224	0.407153	1.55583
		1355	0.360926	0.523979	0.269867	-0.0145222	-0.141356	-0.180397	-0.722768	-0.531751	-0.0912874	0.695605	1.44448	-0.522096	1.50885
		1357	-0.717263	0.340176	0.0407662	1.75106	-0.141356	-0.180397	-0.722768	-0.531751	-0.0912874	0.695605	1.18064	-0.467675	0.0861616
		1359	-0.220768	-0.712031	-0.801163	-0.556784	-0.141356	-0.180397	-0.722768	-0.531751	-0.0912874	-1.43628	-0.687975	0.38324	-0.681759
		1360	-0.204382	0.256629	2.29401	1.76263	-0.141356	-0.180397	-0.722768	-0.531751	-0.0912874	-1.43628	0.422914	-0.214355	-0.841633
		1361	0.0445517	0.523979	0.470785	-1.00867	-0.141356	-0.180397	1.86769	-0.531751	-0.0912874	0.695605	-0.719086	0.244503	-0.638771
		1362	-0.893382	0.76905	0.295987	-0.42583	-0.141356	-0.180397	1.73348	-0.531751	-0.0912874	0.695605	-0.942317	0.113616	-0.759297
		1363	1.51248	0.85074	-1.41021	4.15573	-0.141356	-0.180397	0.902069	-0.531751	-0.0912874	0.695605	1.97757	-0.55179	2.04036
		1364	-0.220768	-0.498926	-0.919696	-0.539944	-0.141356	-0.180397	-0.722768	-0.531751	-0.0912874	0.695605	-0.287326	0.331327	-0.445349
		1365	-0.677855	0.0338371	-0.0589077	-0.554702	-0.141356	-0.180397	-0.722768	-0.531751	-0.0912874	0.695605	0.0277696	-0.0902008	-0.775634
		1368	1.14608	2.48455	-1.41021	3.09247	-0.141356	9.31662	-0.722768	-0.531751	-0.0912874	0.695605	1.32586	-0.487283	1.90342
		1370	-0.335468	-0.285821	0.990887	-0.399206	-0.141356	-0.180397	-0.722768	-0.531751	-0.0912874	0.695605	-0.75386	-0.602834	-0.76411
		1373	-0.406009	0.720036	0.854807	-1.00867	-0.141356	-0.180397	-0.722768	-0.531751	-0.0912874	0.695605	-0.681865	-0.00927308	-0.841633
		1374	-0.461815	-0.154679	1.21831	-0.49885	-0.141356	-0.180397	-0.722768	-0.531751	-0.0912874	0.695605	-0.336518	0.141071	-0.792036
		1375	-0.461815	-0.154679	1.21831	-0.49885	-0.141356	-0.180397	-0.722768	-0.531751	-0.0912874	0.695605	-0.336518	0.141071	-0.80438
		1376	-0.392818	-0.498926	-0.76533	0.0152293	-0.141356	-0.180397	-0.722768	-0.531751	-0.0912874	0.695605	0.746979	-0.318296	1.26563
		1378	-0.461815	-0.154679	-0.231532	-0.587131	-0.141356	-0.180397	1.9579	-0.531751	-0.0912874	0.695605	-0.598342	-0.295711	0.119292
		1381	0.208514	1.61959	0.756108	-0.0795835	-0.141356	-0.180397	0.236715	-0.531751	-0.0912874	0.695605	1.19577	-0.141167	0.601675
		1384	-0.809595	-0.176224	0.805139	-0.2088	-0.141356	-0.180397	-0.722768	-0.531751	-0.0912874	0.695605	-1.98348	0.317967	-0.841633
		1385	12.7977	-4.86758	-1.41021	5.0595	-0.141356	-0.180397	-0.722768	-0.531751	-0.0912874	-1.43628	2.16345	-2.17911	1.9242
		1386	-0.6445	-0.619685	0.681482	-1.00867	-0.141356	-0.180397	-0.722768	-0.531751	-0.0912874	0.695605	-1.55618	0.280369	-0.841633
		1387	5.54292	-3.64223	-1.41021	1.74137	-0.141356	-0.180397	-0.722768	-0.531751	-0.0912874	-1.43628	1.70198	-2.03398	1.87366
		1389	-0.335468	0.99281	0.268475	-1.00867	-0.141356	-0.180397	1.09735	-0.531751	-0.0912874	0.695605	-0.704556	-0.628297	-0.749647
		1390	0.315203	-0.68696	-1.41021	-1.00867	-0.141356	-0.180397	-0.722768	-0.531751	-0.0912874	-1.43628	-0.436409	-0.116558	-0.778049
		1391	0.208514	0.466315	1.19105	0.351526	-0.141356	-0.180397	-0.722768	-0.531751	-0.0912874	0.695605	0.144274	-1.1772	-0.728634
		1392	-0.14157	-0.634538	-0.752602	-0.534075	-0.141356	-0.180397	-0.722768	-0.531751	-0.0912874	-1.43628	-0.551866	0.326901	-0.63244
		1395	-0.603997	-0.219685	0.843246	-1.00867	-0.141356	-0.180397	-0.722768	-0.531751	-0.0912874	0.695605	-1.35532	0.604241	-0.841633
		1396	0.499113	0.85074	-1.41021	0.00807208	-0.141356	-0.180397	0.328054	1.87885	-0.0912874	-1.43628	1.46621	0.0576343	1.16422
		1397	-0.603997	-0.726728	0.234621	-0.647161	-0.141356	-0.180397	1.55739	-0.531751	-0.0912874	0.695605	-1.20233	-0.249313	-0.7785
		1399	-0.406009	1.30821	-0.282502	1.08986	-0.141356	-0.180397	0.536297	1.87885	-0.0912874	0.695605	1.06555	0.474663	1.41326
		1400	-0.260913	-1.43659	-1.41021	-1.00867	-0.141356	-0.180397	-0.722768	-0.531751	-0.0912874	-1.43628	0.0806465	-0.63724	-0.841629
		1401	-0.335468	0.779705	0.50169	-1.00867	-0.141356	-0.180397	-0.722768	-0.531751	-0.0912874	0.695605	-0.585454	-0.337975	-0.806894
		1402	-1.00838	1.39534	-0.863304	1.7582	4.66476	-0.180397	0.371403	1.87885	-0.0912874	0.695605	1.42534	1.33736	1.62532
		1404	-0.513074	0.306138	0.506682	-0.0252566	-0.141356	-0.180397	0.868982	-0.531751	-0.0912874	0.695605	0.154401	-0.198485	-0.407721
		1406	0.926234	-0.188955	-1.41021	3.76357	-0.141356	-0.180397	-0.722768	-0.531751	-0.0912874	0.695605	1.72795	-0.814232	1.82709
		1407	0.360926	0.383938	-0.779634	0.0574106	-0.141356	-0.180397	-0.722768	-0.531751	-0.0912874	-1.43628	1.46541	-0.328222	1.82271
		1408	-0.611144	0.68736	0.112504	-0.569457	-0.141356	-0.180397	1.87135	1.87885	-0.0912874	0.695605	-0.808585	-0.444185	-0.678559
		1411	-0.345027	0.442289	-0.303737	0.946425	-0.141356	-0.180397	0.728234	1.87885	-0.0912874	0.695605	0.757133	0.385666	1.71621
		1412	0.315203	2.48455	-0.755779	0.531058	-0.141356	-0.180397	-0.722768	-0.531751	-0.0912874	0.695605	1.29748	0.297209	1.93722
		1413	-0.813659	0.85074	-0.522014	0.912236	-0.141356	-0.180397	0.443535	1.87885	-0.0912874	0.695605	0.673831	1.11248	-0.260525
		1414	-0.840425	0.894897	-0.324609	0.758493	-0.141356	-0.180397	0.55011	1.87885	-0.0912874	0.695605	0.190019	0.852786	-0.153451
		1415	0.208514	1.61959	-0.73245	2.66786	-0.141356	-0.180397	0.375604	-0.531751	-0.0912874	0.695605	2.12186	0.215622	1.95636
		1416	-0.454374	0.523979	1.22675	-1.00867	-0.141356	-0.180397	-0.722768	-0.531751	-0.0912874	0.695605	-0.726263	-0.128882	-0.807719
		1417	-0.554412	0.124604	0.396897	-1.00867	-0.141356	-0.180397	-0.722768	-0.531751	-0.0912874	0.695605	-0.791317	-0.0555461	-0.805946
		1419	-0.729048	-0.68696	0.347988	-0.704664	-0.141356	-0.180397	-0.722768	-0.531751	-0.0912874	0.695605	-2.19894	0.0100366	-0.841611
		1422	-0.461815	0.976418	-0.522604	-0.509885	-0.141356	-0.180397	1.6234	-0.531751	-0.0912874	0.695605	0.249382	-0.212087	-0.521641
		1424	0.706392	-0.908743	-0.174217	1.38235	-0.141356	-0.180397	-0.722768	-0.531751	-0.0912874	0.695605	1.13721	-0.624514	1.53241
		1426	-0.278118	0.5666	0.914007	0.123008	-0.141356	-0.180397	0.120394	1.87885	-0.0912874	0.695605	0.361843	-0.324783	-0.829178
		1436	-1.19011	0.429113	-0.903943	-0.393939	-0.141356	-0.180397	-0.722768	-0.531751	-0.0912874	-1.43628	-2.1525	3.45285	-0.5725
		1438	-0.598702	0.208888	2.21793	-0.410638	-0.141356	-0.180397	-0.722768	1.87885	-0.0912874	0.695605	-0.752168	-0.305658	-0.771544
		1439	0.23971	1.71064	-0.533763	-1.00867	-0.141356	-0.180397	-0.722768	-0.531751	-0.0912874	-1.43628	-0.957298	2.63374	-0.815012
		1441	0.520372	0.383938	-1.41021	3.28691	-0.141356	-0.180397	0.964767	-0.531751	-0.0912874	-1.43628	2.58456	-0.173857	2.04036
		1444	-0.454374	-0.0641913	0.306673	-0.478155	-0.141356	-0.180397	-0.722768	-0.531751	-0.0912874	0.695605	-0.452565	-0.114397	-0.560319
		1446	-0.840425	1.02737	-0.124969	0.40686	4.66476	-0.180397	0.475625	1.87885	-0.0912874	0.695605	0.724932	0.867597	1.57912
		1447	0.0899721	-0.783066	2.26951	-1.00867	-0.141356	-0.180397	-0.722768	-0.531751	-0.0912874	-1.43628	-1.53574	-0.0960569	-0.841626
		1449	-0.0318145	-0.946447	0.0235286	-0.543873	-0.141356	-0.180397	-0.722768	-0.531751	-0.0912874	0.695605	-0.538138	-0.502083	-0.370431
		1450	-0.603997	-0.219685	0.10964	-0.159781	-0.141356	-0.180397	0.69716	1.87885	-0.0912874	0.695605	-0.694472	-0.0424185	-0.638771
		1451	0.22274	0.646514	-1.41021	0.390023	-0.141356	9.31662	-0.722768	1.87885	-0.0912874	0.695605	0.299461	-0.28035	-0.841633
		1452	-0.611144	0.360598	0.484521	0.108719	-0.141356	-0.180397	-0.722768	-0.531751	-0.0912874	0.695605	-0.213419	0.113521	-0.759297
		1454	-0.0148443	0.93673	0.229254	-1.00867	-0.141356	-0.180397	0.535234	1.87885	-0.0912874	0.695605	0.423336	0.0151336	-0.647889
		1455	-0.327881	1.16493	-0.651804	-0.123343	4.66476	-0.180397	-0.722768	-0.531751	-0.0912874	0.695605	0.831738	1.80244	1.76092
		1456	0.208514	0.177996	0.0744625	0.305615	-0.141356	-0.180397	-0.722768	-0.531751	-0.0912874	0.695605	0.775614	0.0750451	0.838677
		1457	-0.775769	0.0338371	-0.488298	1.21648	-0.141356	-0.180397	0.577087	-0.531751	10.9443	0.695605	0.0183813	0.473674	2.01952
		1459	-0.0318145	0.76905	0.720966	-0.400008	-0.141356	-0.180397	-0.722768	1.87885	-0.0912874	0.695605	0.297379	0.387874	0.586957
		1460	-0.345027	0.646514	0.202246	-0.490938	-0.141356	-0.180397	-0.722768	1.87885	-0.0912874	0.695605	0.0912767	0.419423	-0.224527
		1465	-0.568259	0.625388	0.254649	-0.575547	-0.141356	-0.180397	1.61983	-0.531751	-0.0912874	0.695605	-0.40542	-0.579936	-0.619019
		1466	-0.330006	-1.30291	-1.17085	-0.468244	-0.141356	-0.180397	-0.722768	1.87885	-0.0912874	0.695605	0.0874224	0.24006	-0.620123
		1468	-0.0318145	0.0338371	1.82152	-1.00867	-0.141356	-0.180397	-0.722768	-0.531751	-0.0912874	0.695605	-0.885596	-0.00677865	-0.841633
		1470	-0.392818	-0.498926	-0.531695	-0.450128	-0.141356	-0.180397	-0.722768	1.87885	-0.0912874	0.695605	-0.0119915	-0.2874	-0.816438
		1473	-1.10873	0.370209	-0.367319	0.532657	-0.141356	-0.180397	0.572189	-0.531751	-0.0912874	0.695605	0.0425074	0.546292	-0.224527
		1476	0.499113	1.50426	-0.788362	1.44442	-0.141356	-0.180397	0.788459	-0.531751	-0.0912874	0.695605	1.55876	0.00465984	1.95636
		1477	-0.809595	0.243898	-0.791672	1.25998	-0.141356	-0.180397	0.672863	1.87885	-0.0912874	0.695605	0.319639	0.554504	0.731844
		1478	7.96118	-4.05068	0.749889	-1.00867	-0.141356	-0.180397	-0.722768	-0.531751	-0.0912874	-1.43628	1.35531	-0.416979	1.09277
		1481	-0.845012	0.678761	-0.333022	0.87053	-0.141356	-0.180397	1.41076	-0.531751	-0.0912874	0.695605	0.514157	0.982215	0.844225
		1483	-0.603997	-0.557713	-1.03179	-0.596408	-0.141356	-0.180397	-0.722768	-0.531751	-0.0912874	-1.43628	-0.612066	0.588414	-0.782638
		1485	0.343653	2.17821	-0.765296	0.581382	-0.141356	-0.180397	-0.722768	-0.531751	-0.0912874	0.695605	0.798099	-0.170062	1.89223
		1486	-0.711211	0.456373	-1.41021	0.684184	-0.141356	-0.180397	-0.722768	1.87885	-0.0912874	0.695605	-0.881319	0.119381	-0.835338
		1487	-0.598702	0.0338371	0.334347	-0.522122	-0.141356	-0.180397	-0.722768	-0.531751	-0.0912874	0.695605	0.143644	0.0201948	-0.787929
		1492	0.706392	-1.59997	-1.41021	-1.00867	-0.141356	-0.180397	1.37762	1.87885	-0.0912874	-1.43628	0.684262	-0.890826	-0.841633
		1495	-0.454374	-0.0641913	-0.514545	0.448798	-0.141356	-0.180397	0.717614	-0.531751	-0.0912874	0.695605	0.684807	-0.0576689	1.16422
		1497	0.315203	0.754634	0.819924	-1.00867	-0.141356	-0.180397	-0.722768	-0.531751	-0.0912874	-1.43628	-1.23851	2.30829	-0.665268
		1498	-0.14157	-0.411746	-0.128313	-0.131308	-0.141356	-0.180397	-0.722768	-0.531751	-0.0912874	0.695605	-0.259499	0.78472	-0.118363
		1499	-0.639735	-0.219685	-0.71735	0.951551	-0.141356	-0.180397	0.765385	-0.531751	-0.0912874	0.695605	0.730883	-0.0133946	2.04036
		1500	-0.0787583	1.1478	-0.256867	-0.480492	-0.141356	-0.180397	1.9559	-0.531751	-0.0912874	0.695605	0.282886	1.4882	2.04036
		1501	-0.650956	-0.519549	1.51647	-0.246882	-0.141356	-0.180397	-0.722768	1.87885	-0.0912874	-1.43628	-2.96118	0.208544	-0.834031
		1505	-0.184547	0.0338371	-0.852581	3.35156	-0.141356	-0.180397	-0.722768	1.87885	-0.0912874	0.695605	1.46876	0.19984	1.69367
		1506	0.360926	-0.783066	-0.230035	1.82903	-0.141356	-0.180397	-0.722768	-0.531751	-0.0912874	0.695605	1.0513	-0.524052	1.38902
		1512	-0.260913	0.383938	-0.700611	0.191011	-0.141356	-0.180397	1.55007	1.87885	-0.0912874	0.695605	0.979147	0.0999734	1.24051
		1518	0.154858	0.162822	-0.692903	-0.472523	-0.141356	-0.180397	2.08042	-0.531751	-0.0912874	0.695605	-0.262243	0.587145	1.11257
		1519	-0.292456	-0.170389	1.53538	-0.065173	-0.141356	-0.180397	-0.722768	-0.531751	-0.0912874	-1.43628	-0.573698	-0.284462	-0.714052
		1521	0.360926	-0.129544	-1.41021	0.650015	-0.141356	-0.180397	-0.722768	-0.531751	-0.0912874	0.695605	1.13401	-1.08145	1.11257
		1522	0.926234	-0.634538	-1.41021	1.63493	-0.141356	-0.180397	-0.722768	1.87885	-0.0912874	-1.43628	2.06173	-0.849917	2.04036
		1523	-0.204382	0.0338371	1.61538	1.20465	-0.141356	-0.180397	-0.722768	1.87885	-0.0912874	0.695605	0.309236	0.0783826	0.0527652
		1524	0.0899721	-1.32767	0.257139	0.118892	-0.141356	-0.180397	-0.722768	-0.531751	-0.0912874	-1.43628	-0.337181	-0.536995	-0.766518
		1525	1.19005	0.256629	4.26436	-1.00867	-0.141356	-0.180397	-0.722768	-0.531751	-0.0912874	-1.43628	-0.476693	0.74822	-0.841631
		1528	-0.682159	0.587223	-0.220918	-1.00867	-0.141356	-0.180397	1.75627	-0.531751	-0.0912874	0.695605	0.00250087	-0.432612	-0.370431
		1529	0.360926	0.383938	-0.707982	-1.00867	-0.141356	-0.180397	-0.722768	-0.531751	-0.0912874	-1.43628	1.31943	-0.356811	1.30055
		1531	-0.598702	0.90909	-0.893728	1.48969	-0.141356	-0.180397	-0.497451	1.87885	-0.0912874	0.695605	1.21873	0.440041	0.557364
		1532	-0.972734	0.318803	0.0796344	2.466	-0.141356	-0.180397	-0.722768	-0.531751	-0.0912874	-1.43628	2.14554	1.29922	-0.0148434
		1533	0.343653	0.0338371	0.820265	-0.293818	-0.141356	-0.180397	-0.722768	-0.531751	-0.0912874	0.695605	0.944985	-0.500981	-0.698597
		1536	-0.278118	0.14039	-0.474047	-0.483007	-0.141356	-0.180397	0.765379	1.87885	-0.0912874	0.695605	-0.877609	0.20161	-0.841633
		1537	-0.744566	-0.045218	-0.407685	1.61584	-0.141356	-0.180397	0.494287	-0.531751	10.9443	0.695605	0.224144	0.485176	2.04036
		1539	4.09196	-2.41687	-1.41021	-1.00867	-0.141356	-0.180397	-0.722768	-0.531751	-0.0912874	-1.43628	0.854052	0.0983004	0.964703
		1543	4.09196	-1.43659	3.23727	-1.00867	-0.141356	-0.180397	-0.722768	-0.531751	-0.0912874	-1.43628	0.740277	0.551612	0.233212
		1545	-0.554412	0.124604	0.396897	-1.00867	-0.141356	-0.180397	-0.722768	-0.531751	-0.0912874	0.695605	-0.791317	-0.0555461	-0.841633
		1546	-0.6445	1.01412	0.0201022	1.19358	-0.141356	-0.180397	0.462801	1.87885	-0.0912874	0.695605	0.977965	0.528275	0.281096
		1548	-0.554412	-0.0569299	0.868976	-1.00867	-0.141356	-0.180397	-0.722768	-0.531751	-0.0912874	-1.43628	-1.49397	0.67481	-0.841633
		1549	-0.722582	0.405157	0.0943371	1.86324	-0.141356	-0.180397	0.626924	-0.531751	-0.0912874	0.695605	1.30059	0.959816	1.82709
		1552	-0.461815	1.16493	0.247285	-0.437842	-0.141356	-0.180397	1.46506	-0.531751	-0.0912874	0.695605	0.119996	-0.335815	1.43737
		1553	-0.00486173	-1.87227	-0.755395	0.118892	-0.141356	-0.180397	-0.722768	-0.531751	-0.0912874	-1.43628	-0.468004	-0.571042	-0.773179
		1554	-0.220768	-0.712031	-0.801163	-0.556784	-0.141356	-0.180397	-0.722768	-0.531751	-0.0912874	-1.43628	-0.687975	0.38324	-0.690972
		1555	-1.26562	0.0704149	-0.471815	1.7691	-0.141356	-0.180397	0.302328	-0.531751	10.9443	0.695605	-0.804629	2.16249	2.04036
		1556	-0.471736	0.306138	0.0604316	-1.00867	-0.141356	-0.180397	1.22521	-0.531751	-0.0912874	0.695605	-1.09133	-0.289845	-0.801578
		1558	-0.19182	-1.48327	0.855811	-0.0271124	-0.141356	-0.180397	-0.722768	-0.531751	-0.0912874	-1.43628	-2.37567	-0.223842	-0.837186
		1559	-0.19182	-0.549665	1.40592	0.211174	-0.141356	-0.180397	-0.722768	-0.531751	-0.0912874	-1.43628	-1.58227	-0.488665	-0.816843
		1561	0.208514	-1.2636	0.441115	0.190495	-0.141356	-0.180397	-0.722768	-0.531751	-0.0912874	-1.43628	-0.206404	-0.502474	-0.684561
		1562	0.208514	-0.68696	1.19796	1.439	-0.141356	-0.180397	-0.722768	1.87885	-0.0912874	-1.43628	0.440002	-1.01908	0.233212
		1563	0.208514	-0.68696	1.76457	0.449514	-0.141356	-0.180397	-0.722768	1.87885	-0.0912874	-1.43628	0.2692	-1.09084	-0.608785
		1566	-0.278118	0.353495	1.45649	-1.00867	-0.141356	-0.180397	-0.722768	-0.531751	-0.0912874	0.695605	-0.887561	-0.39096	-0.800261
		1570	-0.513074	1.21381	-0.641446	-0.112319	-0.141356	2.98528	1.54053	-0.531751	-0.0912874	0.695605	0.0805621	-0.342452	-0.59936
		1571	-0.722582	0.256629	0.688841	0.0555102	-0.141356	-0.180397	-0.722768	1.87885	-0.0912874	0.695605	-0.723913	-0.159614	-0.837062
		1573	-0.677855	-0.783066	-0.996834	0.574068	-0.141356	-0.180397	-0.722768	-0.531751	-0.0912874	-1.43628	0.311878	0.589891	0.844225
		1576	-0.677855	-0.783066	-0.996834	0.574068	-0.141356	-0.180397	-0.722768	-0.531751	-0.0912874	-1.43628	0.311878	0.589891	0.439894
		1579	-0.0148443	0.420791	-0.465431	0.284372	-0.141356	-0.180397	-0.722768	-0.531751	-0.0912874	0.695605	0.759713	0.26148	1.87734
		1581	-0.19182	0.150538	-0.66667	0.13648	-0.141356	-0.180397	-0.722768	-0.531751	-0.0912874	0.695605	0.451069	0.278039	0.215516
		1583	-0.392818	-0.0727155	-0.640339	0.186521	-0.141356	-0.180397	-0.722768	-0.531751	-0.0912874	0.695605	-0.495298	-0.101559	-0.841633
		1584	-0.554412	-0.9646	-0.313231	-0.207297	-0.141356	-0.180397	-0.722768	-0.531751	-0.0912874	0.695605	-0.285694	-0.277889	-0.771544
		1588	-0.560317	-0.666366	-0.822022	0.198837	-0.141356	-0.180397	-0.722768	-0.531751	-0.0912874	-1.43628	-0.304145	0.385479	-0.48332
		1590	-0.450169	-0.783066	-1.10356	1.41214	-0.141356	-0.180397	-0.722768	1.87885	-0.0912874	0.695605	1.28876	0.0717018	1.11257
		1592	-0.68801	0.952853	-0.0527076	0.645553	-0.141356	-0.180397	0.597364	1.87885	-0.0912874	0.695605	0.481782	0.839368	-0.370431
		1595	-0.41717	1.54197	-0.0129385	-0.486239	-0.141356	-0.180397	1.62356	-0.531751	-0.0912874	0.695605	0.2951	-0.0729863	1.48516
		1596	1.51248	-0.456305	2.09831	0.406846	-0.141356	-0.180397	-0.722768	-0.531751	-0.0912874	-1.43628	0.866139	-1.53191	-0.188837
		1597	-0.397598	0.0338371	-0.30834	-0.487065	-0.141356	-0.180397	-0.722768	-0.531751	-0.0912874	0.695605	-0.232557	-0.367022	-0.553331
		1598	-0.278118	0.353495	0.0849004	-1.00867	-0.141356	-0.180397	1.03147	-0.531751	-0.0912874	0.695605	-0.361264	0.300682	-0.521641
		1599	-0.785209	-0.456305	0.526602	-0.0431316	-0.141356	-0.180397	1.91671	1.87885	-0.0912874	0.695605	-2.11069	-0.179051	-0.78834
		1600	-0.603997	-0.557713	0.582385	-1.00867	-0.141356	-0.180397	-0.722768	-0.531751	-0.0912874	-1.43628	-1.67562	0.627679	-0.841633
		1601	0.520372	0.383938	5.04764	-1.00867	-0.141356	-0.180397	-0.722768	-0.531751	-0.0912874	-1.43628	-1.01833	-0.431436	-0.841633
		1602	-0.6445	-0.129544	0.0308192	0.162711	-0.141356	-0.180397	0.720121	-0.531751	-0.0912874	0.695605	0.0156579	0.313167	0.312715
		1603	-0.0148443	-0.869056	-0.01974	-0.472523	-0.141356	-0.180397	-0.722768	-0.531751	-0.0912874	0.695605	-0.100865	-0.28325	-0.759297
		1604	-0.598702	0.90909	0.221907	0.0112998	-0.141356	2.98528	-0.722768	1.87885	-0.0912874	0.695605	0.384446	0.0757539	-0.804174
		1605	-1.27396	0.0683541	-0.372334	1.30922	-0.141356	-0.180397	-0.722768	1.87885	-0.0912874	0.695605	-0.250088	2.37085	0.406153
		1607	-0.722582	0.85074	-0.262027	-1.00867	-0.141356	-0.180397	1.93798	-0.531751	-0.0912874	0.695605	-0.862661	-0.575755	-0.800261
		1608	1.19005	-1.08012	0.598833	-1.00867	-0.141356	-0.180397	-0.722768	-0.531751	-0.0912874	-1.43628	0.376708	-0.711784	-0.841633
		1609	0.360926	0.85074	-1.41021	0.498121	-0.141356	9.31662	-0.722768	1.87885	-0.0912874	0.695605	0.488677	-0.352303	-0.825233
		1610	-0.471736	-0.419998	-0.947393	0.250871	-0.141356	-0.180397	-0.722768	-0.531751	-0.0912874	-1.43628	0.18117	0.65319	0.0190983
		1611	-0.19182	-0.0828633	0.0667045	-0.418213	-0.141356	-0.180397	-0.722768	-0.531751	-0.0912874	0.695605	-0.596095	0.166364	-0.761458
		1613	-0.532521	0.794402	0.470702	-1.00867	-0.141356	-0.180397	-0.722768	-0.531751	-0.0912874	-1.43628	-0.546472	0.689938	-0.827504
		1615	0.208514	-1.2636	0.113976	0.970294	-0.141356	-0.180397	-0.722768	-0.531751	-0.0912874	0.695605	-0.0894712	-0.431739	0.00453729
		1617	-1.12098	0.222353	-1.41021	0.198797	-0.141356	-0.180397	1.36611	-0.531751	-0.0912874	0.695605	-0.727341	1.94989	1.78309
		1619	-0.108181	-0.701376	-0.131504	-1.00867	-0.141356	-0.180397	1.59445	-0.531751	-0.0912874	0.695605	-0.170562	-0.178698	-0.171106
		1622	-0.108181	-1.43659	-0.0234791	-0.00161118	-0.141356	-0.180397	-0.722768	-0.531751	-0.0912874	-1.43628	-0.631166	0.0668126	-0.809658
		1623	0.0700071	-0.611086	1.35725	-0.44806	-0.141356	-0.180397	-0.722768	-0.531751	-0.0912874	0.695605	-0.703662	-1.12822	-0.830131
		1624	-0.889466	0.222353	-0.405408	-0.098616	-0.141356	-0.180397	0.844468	-0.531751	-0.0912874	0.695605	-0.933951	0.927175	-0.800261
		1625	-0.650956	-0.361439	0.511436	0.500464	-0.141356	-0.180397	-0.722768	1.87885	-0.0912874	-1.43628	-0.545459	0.874424	-0.800261
		1627	-0.658757	-0.425671	-0.3653	-0.684427	-0.141356	-0.180397	1.58751	-0.531751	-0.0912874	0.695605	-1.51387	0.838085	-0.77277
		1629	-1.03328	1.38423	0.0653262	-1.00867	-0.141356	-0.180397	1.85012	-0.531751	-0.0912874	0.695605	-2.31086	1.12045	-0.833325
		1630	-0.122727	0.383938	1.58561	0.156185	-0.141356	-0.180397	-0.722768	-0.531751	-0.0912874	0.695605	-0.495085	-0.00116288	-0.48332
		1631	-0.122727	0.383938	0.998493	-0.434262	-0.141356	-0.180397	0.792489	-0.531751	-0.0912874	0.695605	-0.275202	0.0334948	-0.771544
		1633	-1.10608	0.523979	-1.41021	0.936344	-0.141356	-0.180397	-0.722768	-0.531751	-0.0912874	-1.43628	-0.343591	2.47559	-0.296839
		1634	-0.184547	-0.946447	-0.504713	-1.00867	-0.141356	-0.180397	-0.722768	-0.531751	-0.0912874	-1.43628	0.00799301	-0.706477	-0.839825
		1635	-0.184547	-0.946447	-0.504713	-1.00867	-0.141356	-0.180397	-0.722768	-0.531751	-0.0912874	-1.43628	0.0491357	-0.781698	-0.726813
		1636	-0.450169	-1.19152	-0.76533	-1.00867	-0.141356	-0.180397	-0.722768	-0.531751	-0.0912874	-1.43628	-0.490541	-0.829251	-0.841621
		1637	-0.0148443	0.93673	-0.69715	1.81343	-0.141356	-0.180397	0.470368	1.87885	-0.0912874	0.695605	1.68207	0.43248	1.41326
		1640	-0.19182	0.617339	-0.33286	1.21982	-0.141356	-0.180397	-0.722768	-0.531751	-0.0912874	0.695605	0.826894	-0.186621	1.1898
		1641	-0.760823	1.22418	-0.177452	0.079932	4.66476	-0.180397	0.587953	1.87885	-0.0912874	0.695605	0.477589	1.04557	1.82709
		1642	0.839264	-1.01647	0.953151	-1.00867	-0.141356	-0.180397	-0.722768	-0.531751	-0.0912874	-1.43628	-0.420185	-1.67103	-0.841601
		1643	-1.07459	0.754634	-0.747676	-0.23196	-0.141356	-0.180397	0.721169	1.87885	-0.0912874	0.695605	-1.08554	1.5219	-0.759297
		1645	-0.204382	0.925004	0.67851	-1.00867	-0.141356	-0.180397	-0.722768	-0.531751	-0.0912874	0.695605	-0.684033	0.0361744	-0.723054
		1647	-0.471736	1.03227	0.681194	-0.497938	-0.141356	-0.180397	0.671107	-0.531751	-0.0912874	0.695605	0.085308	0.597874	-0.407721
		1648	-0.335468	-0.712031	0.300931	-1.00867	-0.141356	-0.180397	-0.722768	-0.531751	-0.0912874	-1.43628	-0.333461	-0.656394	-0.841619
		1649	-0.292456	1.25919	0.0784821	0.0501038	-0.141356	-0.180397	1.39689	-0.531751	-0.0912874	0.695605	0.409511	-0.330121	1.36463
		1651	-0.0318145	0.76905	0.720966	-0.400008	-0.141356	-0.180397	-0.722768	1.87885	-0.0912874	0.695605	0.434398	0.433593	0.788414
		1653	-0.0148443	0.678761	0.234047	-1.00867	-0.141356	-0.180397	0.638059	1.87885	-0.0912874	0.695605	0.190104	0.269879	-0.0363698
		1655	1.14608	-0.374614	0.619981	1.47024	-0.141356	-0.180397	-0.722768	-0.531751	-0.0912874	0.695605	0.876642	-0.632723	-0.370431
		1656	1.07843	-0.908743	0.72086	-1.00867	-0.141356	-0.180397	-0.722768	-0.531751	-0.0912874	-1.43628	-0.214446	-0.726374	-0.776985
		1660	-0.729048	0.322156	0.557234	-1.00867	-0.141356	-0.180397	1.84801	1.87885	-0.0912874	0.695605	-1.6149	0.0222362	-0.808502
		1662	-0.818639	1.02737	0.590264	-0.340687	-0.141356	-0.180397	0.713815	-0.531751	-0.0912874	0.695605	-1.31703	0.112033	-0.718732
		1663	3.12466	0.383938	-1.41021	-1.00867	-0.141356	-0.180397	1.18827	-0.531751	-0.0912874	-1.43628	1.67728	-1.42567	1.80075
		1664	0.343653	1.87187	-1.41021	-1.00867	-0.141356	-0.180397	-0.722768	-0.531751	-0.0912874	0.695605	1.53119	0.756812	1.41326
		1666	1.91552	-1.87227	-0.14134	0.869295	-0.141356	-0.180397	-0.722768	-0.531751	-0.0912874	-1.43628	0.650603	-0.373961	0.648716
		1667	-0.677855	1.34088	-0.796253	2.30353	-0.141356	-0.180397	-0.738397	1.87885	-0.0912874	0.695605	1.91983	0.517067	1.41326
		1668	0.101826	-0.398641	-0.629897	-1.00867	-0.141356	-0.180397	1.17072	1.87885	-0.0912874	-1.43628	0.257284	0.0606475	0.0251785
		1672	-0.397598	-0.987292	-0.511163	-0.532253	-0.141356	-0.180397	-0.722768	-0.531751	-0.0912874	0.695605	-0.420065	0.155814	-0.192392
		1673	-0.611144	0.85074	0.112624	0.293833	-0.141356	-0.180397	1.11639	-0.531751	-0.0912874	0.695605	-0.066539	-0.107248	0.37524
		1675	-0.292456	0.238063	0.498968	-0.518051	-0.141356	-0.180397	-0.722768	1.87885	-0.0912874	0.695605	-1.02861	-0.0591545	-0.759297
		1676	-0.513074	-0.0569299	1.5144	-0.531021	-0.141356	-0.180397	-0.722768	1.87885	-0.0912874	0.695605	-0.994374	-0.188776	-0.800261
		1677	-0.68801	1.41236	-0.769815	0.209345	4.66476	-0.180397	0.616442	1.87885	-0.0912874	0.695605	1.5557	0.772437	1.55583
		1678	1.51248	-0.456305	3.1469	0.433003	-0.141356	-0.180397	-0.722768	-0.531751	-0.0912874	-1.43628	-0.15903	-1.00281	-0.779237
		1679	2.43372	0.0338371	-0.66687	-1.00867	-0.141356	-0.180397	1.06789	-0.531751	-0.0912874	-1.43628	1.57565	-0.849706	1.94148
		1680	-0.598702	0.0338371	-0.0500881	0.318172	-0.141356	-0.180397	-0.722768	-0.531751	-0.0912874	0.695605	0.415051	-0.0133142	-0.820895
		1681	1.19005	-1.97129	-0.310522	-0.0990306	-0.141356	-0.180397	-0.722768	-0.531751	-0.0912874	-1.43628	0.31744	-0.827752	-0.841155
		1685	0.22274	-1.80419	-0.627537	0.271672	-0.141356	-0.180397	-0.722768	-0.531751	-0.0912874	-1.43628	-0.197169	-0.412527	-0.841632
		1686	0.926234	-2.00842	-0.445673	-0.179386	-0.141356	-0.180397	-0.722768	-0.531751	-0.0912874	-1.43628	0.130606	-0.246195	-0.73329
		1688	-0.108181	-0.211234	-0.343798	-1.00867	-0.141356	-0.180397	-0.722768	-0.531751	-0.0912874	0.695605	-0.221653	0.0487467	-0.505158
		1689	0.101826	-0.398641	0.447881	-0.140341	-0.141356	-0.180397	-0.722768	-0.531751	-0.0912874	0.695605	0.0832948	-0.382123	-0.839845
		1691	-0.204382	0.256629	0.224391	-0.514173	-0.141356	-0.180397	1.484	-0.531751	-0.0912874	0.695605	0.065225	-0.967656	-0.718732
		1692	1.19005	-0.634538	1.30082	2.99139	-0.141356	-0.180397	-0.722768	-0.531751	-0.0912874	-1.43628	1.15974	-1.16636	0.527558
		1694	-0.858367	-0.0361832	-0.59924	1.35642	-0.141356	-0.180397	0.61863	-0.531751	10.9443	0.695605	0.183203	0.668786	2.04036
		1696	1.91552	-0.783066	0.409874	1.22924	-0.141356	-0.180397	-0.722768	-0.531751	-0.0912874	-1.43628	1.04829	-1.43275	0.712434
		1697	1.91552	-0.783066	0.755413	0.31686	-0.141356	-0.180397	-0.722768	-0.531751	-0.0912874	-1.43628	0.962894	-1.53657	1.03122
		1701	-0.639735	-0.219685	1.40626	0.0352076	-0.141356	-0.180397	-0.722768	1.87885	-0.0912874	0.695605	-0.416513	0.123396	-0.709458
		1702	0.892413	-1.28578	1.03506	-0.246778	-0.141356	-0.180397	-0.722768	-0.531751	-0.0912874	-1.43628	0.0521119	-1.06886	-0.674364
		1704	-0.840425	-0.562281	-0.0824441	-0.706739	-0.141356	-0.180397	1.90159	-0.531751	-0.0912874	0.695605	-1.37451	-0.0181054	-0.638771
		1706	-0.108181	-0.211234	0.107147	-1.00867	-0.141356	-0.180397	1.45927	-0.531751	-0.0912874	0.695605	-0.147604	-0.356928	-0.801949
		1707	-1.46853	0.813608	0.135419	1.32023	-0.141356	-0.180397	-0.722768	-0.531751	-0.0912874	0.695605	-2.81095	6.3816	-0.48332
		1708	-1.46853	0.813608	0.223287	1.32023	-0.141356	-0.180397	-0.722768	-0.531751	-0.0912874	0.695605	-2.75233	6.3816	-0.296839
		1709	-1.46853	0.813608	0.135419	1.32023	-0.141356	-0.180397	-0.722768	-0.531751	-0.0912874	0.695605	-2.92357	6.3816	-0.59936
		1710	-1.47054	0.789319	0.105994	1.29915	-0.141356	-0.180397	-0.722768	-0.531751	-0.0912874	0.695605	-2.93293	6.3816	-0.662598
		1711	-1.47054	0.789319	0.105994	1.29915	-0.141356	-0.180397	-0.722768	-0.531751	-0.0912874	0.695605	-2.93293	6.3816	-0.706639
		1712	1.83492	-1.43659	0.771708	-1.00867	-0.141356	-0.180397	-0.722768	-0.531751	-0.0912874	-1.43628	0.165306	-1.93257	-0.777271
		1713	1.83492	-0.456305	0.866788	-1.00867	-0.141356	-0.180397	-0.722768	-0.531751	-0.0912874	-1.43628	0.521832	-1.62309	-0.0711147
		1714	-0.619752	0.587223	0.168092	-0.64789	-0.141356	-0.180397	2.05138	1.87885	-0.0912874	0.695605	-0.870032	-0.412784	-0.833325
		1717	-0.19182	0.85074	-1.41021	0.200634	-0.141356	-0.180397	1.55169	-0.531751	-0.0912874	0.695605	0.916963	0.0235662	1.82709
		1720	1.45386	-0.634538	0.474967	-1.00867	-0.141356	-0.180397	-0.722768	-0.531751	-0.0912874	0.695605	0.343718	-1.00496	-0.44157
		1721	1.45386	-0.188955	1.66029	-1.00867	-0.141356	-0.180397	-0.722768	-0.531751	-0.0912874	-1.43628	0.637868	-0.808239	-0.110684
		1723	-0.108181	-0.946447	1.11251	0.623169	-0.141356	-0.180397	-0.722768	-0.531751	-0.0912874	0.695605	-0.308001	-0.346507	-0.837062
		1724	0.679818	1.08414	0.469315	1.79486	-0.141356	6.15095	-0.722768	-0.531751	-0.0912874	0.695605	0.703177	-0.701514	0.384538
		1725	0.679818	-1.01647	1.48	-0.228212	-0.141356	-0.180397	-0.722768	-0.531751	-0.0912874	-1.43628	-0.306965	-0.98844	-0.841633
		1726	-1.22847	0.0338371	-0.427906	1.41105	-0.141356	-0.180397	0.437896	-0.531751	10.9443	0.695605	-1.38299	1.66095	2.04036
		1729	0.0899721	-0.510765	-0.624291	0.123195	-0.141356	-0.180397	1.35666	-0.531751	-0.0912874	0.695605	0.709099	-0.0388804	1.76092
		1730	-0.513074	0.306138	0.308051	1.15661	-0.141356	-0.180397	0.589443	1.87885	-0.0912874	0.695605	0.63112	0.468967	1.0865
		1731	0.839264	-0.316264	1.158	-0.315164	-0.141356	-0.180397	-0.722768	1.87885	-0.0912874	-1.43628	-0.251277	-1.05251	-0.823792
		1732	0.679818	-1.01647	0.726833	1.3522	-0.141356	-0.180397	-0.722768	-0.531751	-0.0912874	0.695605	0.341208	-0.830856	-0.0915464
		1733	0.706392	-0.908743	0.156893	-1.00867	-0.141356	-0.180397	-0.722768	-0.531751	-0.0912874	-1.43628	0.526546	-0.788541	-0.291007
		1735	-0.0148443	-0.611086	-0.695412	0.101871	-0.141356	-0.180397	1.58392	-0.531751	-0.0912874	0.695605	0.234447	-0.35414	1.36463
		1736	-0.108181	-0.456305	-0.752427	-0.45903	-0.141356	-0.180397	1.62624	-0.531751	-0.0912874	0.695605	0.138927	-0.26108	1.43737
		1737	-0.611144	0.523979	0.42089	0.247219	-0.141356	-0.180397	0.780305	-0.531751	-0.0912874	0.695605	-1.16044	0.0639788	-0.638771
		1738	-0.780775	0.0338371	-0.588848	0.0609528	-0.141356	-0.180397	0.580413	1.87885	-0.0912874	0.695605	-0.481044	-0.240141	-0.820895
		1739	-0.695101	0.85074	0.401018	-0.319188	-0.141356	-0.180397	1.22763	-0.531751	-0.0912874	0.695605	-1.00942	0.160561	-0.718732
		1740	0.520372	0.0338371	2.0476	0.0932452	-0.141356	-0.180397	-0.722768	-0.531751	-0.0912874	-1.43628	-0.0502369	-0.816036	-0.789161
		1742	-0.6445	-0.456305	0.398704	0.159022	-0.141356	-0.180397	-0.722768	-0.531751	-0.0912874	0.695605	-0.689274	0.315122	-0.808915
		1744	-0.598702	0.90909	0.0800803	0.0911373	-0.141356	6.15095	-0.722768	1.87885	-0.0912874	0.695605	-0.218953	-0.0626957	-0.841633
		1745	0.706392	-0.908743	0.18611	-0.0509851	-0.141356	-0.180397	-0.722768	-0.531751	-0.0912874	-1.43628	0.696806	-1.05084	-0.535563
		1746	0.208514	-0.68696	1.11472	-0.317551	-0.141356	-0.180397	-0.722768	-0.531751	-0.0912874	-1.43628	0.150741	-0.904034	-0.813703
		1748	0.520372	-1.01647	-0.0413765	-0.13441	-0.141356	-0.180397	-0.722768	-0.531751	-0.0912874	-1.43628	0.558887	-1.07186	-0.672287
		1749	-0.675473	-1.01647	-1.41021	-1.00867	-0.141356	-0.180397	-0.722768	-0.531751	-0.0912874	-1.43628	0.0799534	-0.310049	-0.841633
		1750	-0.0318145	0.278908	-0.359286	-0.419243	-0.141356	-0.180397	-0.722768	-0.531751	-0.0912874	0.695605	-0.0955847	0.394329	-0.412968
		1751	0.0899721	0.85074	0.209526	0.278127	-0.141356	-0.180397	-0.722768	-0.531751	-0.0912874	0.695605	1.13269	-0.260332	-0.638771
		1752	1.14608	0.0338371	0.7003	-1.00867	-0.141356	-0.180397	-0.722768	-0.531751	-0.0912874	-1.43628	0.560876	-0.770539	-0.767907
		1753	0.706392	-0.531711	0.781767	0.0365746	-0.141356	-0.180397	-0.722768	-0.531751	-0.0912874	-1.43628	0.498586	-0.930719	-0.76758
		1754	0.706392	-0.154679	1.67057	0.124134	-0.141356	-0.180397	-0.722768	-0.531751	-0.0912874	-1.43628	0.319012	-1.02165	-0.678519
		1756	0.22274	1.25919	-1.41021	-1.00867	-0.141356	-0.180397	0.65436	1.87885	-0.0912874	0.695605	0.75557	0.969908	0.147247
		1757	0.0899721	1.66764	-0.572585	2.20623	-0.141356	-0.180397	-0.156077	-0.531751	-0.0912874	0.695605	1.59878	0.320376	2.04036
		1758	-0.611144	0.360598	0.484521	0.108719	-0.141356	-0.180397	-0.722768	-0.531751	-0.0912874	0.695605	-0.213419	0.113521	-0.822964
		1759	-0.611144	0.360598	0.484521	0.108719	-0.141356	-0.180397	-0.722768	-0.531751	-0.0912874	0.695605	-0.213419	0.113521	-0.815521
		1761	-0.397598	0.0338371	-1.41021	0.522719	-0.141356	-0.180397	0.92675	-0.531751	-0.0912874	0.695605	0.623045	0.0566184	-0.224527
		1763	0.0899721	-0.238464	-0.914571	-0.258925	-0.141356	-0.180397	-0.722768	-0.531751	-0.0912874	-1.43628	1.12304	-0.597771	-0.307795
		1765	-0.19182	0.617339	-0.80163	1.52926	-0.141356	-0.180397	0.573109	1.87885	-0.0912874	0.695605	1.35957	0.618739	0.406153
		1766	2.43372	-1.80419	0.448636	0.271672	-0.141356	-0.180397	-0.722768	-0.531751	-0.0912874	-1.43628	0.749138	-0.933989	0.497538
		1767	2.43372	-1.80419	0.108539	1.08291	-0.141356	-0.180397	-0.722768	-0.531751	-0.0912874	-1.43628	0.834539	-0.897393	1.39631
		1769	1.91552	-2.41687	-0.362888	-1.00867	-0.141356	-0.180397	-0.722768	-0.531751	-0.0912874	-1.43628	0.242709	-0.20694	-0.240328
		1770	1.91552	-1.32767	0.566574	1.19123	-0.141356	-0.180397	-0.722768	-0.531751	-0.0912874	-1.43628	0.471029	-0.936255	-0.841629
		1771	4.09196	-1.43659	-1.41021	4.70168	-0.141356	-0.180397	-0.722768	-0.531751	-0.0912874	-1.43628	2.24158	-1.56454	1.69367
		1772	-0.345027	0.0338371	0.72241	-1.00867	-0.141356	-0.180397	-0.722768	-0.531751	-0.0912874	-1.43628	-0.605795	-0.48029	-0.837863
		1777	1.51248	-0.456305	3.73911	-1.00867	-0.141356	-0.180397	-0.722768	-0.531751	-0.0912874	-1.43628	-0.659217	-1.02343	-0.837506
		1778	1.51248	-0.456305	3.1469	0.433003	-0.141356	-0.180397	-0.722768	-0.531751	-0.0912874	-1.43628	-0.15903	-0.993263	-0.819563
		1780	-0.6445	0.360598	0.095545	-1.00867	-0.141356	-0.180397	1.44698	1.87885	-0.0912874	0.695605	-0.700627	0.407101	-0.445349
		1781	-0.184547	0.278908	-1.0929	-1.00867	-0.141356	-0.180397	-0.722768	1.87885	-0.0912874	-1.43628	0.0817614	0.10837	-0.841633
		1784	0.706392	-2.03984	-0.552127	-0.246778	-0.141356	-0.180397	-0.722768	-0.531751	-0.0912874	-1.43628	0.0138641	-0.729821	-0.657027
		1785	0.360926	-2.09011	-0.708648	-0.353436	-0.141356	-0.180397	-0.722768	-0.531751	-0.0912874	-1.43628	-0.306151	-0.456166	-0.282275
		1789	-1.23937	0.509348	-0.338528	-1.00867	9.47088	-0.180397	-0.722768	-0.531751	-0.0912874	0.695605	-1.00539	1.57295	1.16422
		1790	0.208514	-0.68696	1.6303	0.387843	-0.141356	-0.180397	-0.722768	-0.531751	-0.0912874	-1.43628	-0.619421	-0.904154	-0.822964
		1795	0.208514	-0.975279	0.464256	0.142528	-0.141356	-0.180397	-0.722768	-0.531751	-0.0912874	0.695605	-0.397527	-0.567114	-0.812794
		1796	-0.92453	1.11671	-0.385411	-0.721243	-0.141356	-0.180397	2.08265	-0.531751	-0.0912874	0.695605	-1.18381	0.391202	0.871852
		1797	0.926234	-0.634538	-1.41021	-1.00867	-0.141356	-0.180397	1.30414	1.87885	-0.0912874	0.695605	0.843747	-0.285979	1.18368
		1798	0.101826	-1.19152	-1.41021	-1.00867	-0.141356	-0.180397	1.62234	1.87885	-0.0912874	-1.43628	0.0784649	-0.433136	-0.498568
		1799	-0.598702	1.25919	-0.136742	0.474608	-0.141356	9.31662	-0.722768	1.87885	-0.0912874	0.695605	0.445886	-0.233719	-0.777026
		1800	-0.184547	-1.38499	-1.41021	-0.378748	-0.141356	-0.180397	0.66922	-0.531751	-0.0912874	0.695605	0.304645	-1.35884	-0.82827
		1801	-0.50274	-0.652362	-0.335073	-1.00867	-0.141356	-0.180397	-0.722768	1.87885	-0.0912874	0.695605	-0.95173	0.205857	-0.841633
		1802	-0.471736	-0.238464	-1.23386	-0.229062	-0.141356	-0.180397	-0.722768	-0.531751	-0.0912874	0.695605	-0.579642	0.385447	-0.464291
		1803	1.19005	-1.97129	-0.310522	-0.0990306	-0.141356	-0.180397	-0.722768	-0.531751	-0.0912874	-1.43628	0.31744	-0.739028	-0.42574
		1806	0.22274	0.0338371	-1.41021	-1.00867	-0.141356	-0.180397	0.809927	1.87885	-0.0912874	0.695605	0.463389	0.703559	0.731559
		1809	-0.204382	1.1478	1.28735	-0.327616	-0.141356	2.98528	-0.722768	1.87885	-0.0912874	0.695605	0.0658883	0.04675	-0.77044
		1810	1.51248	-0.456305	0.0928897	0.0828972	-0.141356	-0.180397	1.38359	-0.531751	-0.0912874	-1.43628	0.854586	-1.34704	0.0594659
		1811	1.51248	-0.946447	1.09291	-1.00867	-0.141356	-0.180397	-0.722768	-0.531751	-0.0912874	-1.43628	0.567194	-1.00114	-0.532126
		1813	0.926234	0.0338371	2.57526	1.34429	-0.141356	-0.180397	-0.722768	-0.531751	-0.0912874	-1.43628	0.206674	-0.908737	-0.841633
		1814	2.43372	-2.41687	-1.41021	-1.00867	-0.141356	-0.180397	-0.722768	-0.531751	-0.0912874	-1.43628	1.15276	-1.35711	1.62463
		1817	-0.335468	-0.285821	-0.249593	-1.00867	-0.141356	-0.180397	-0.722768	-0.531751	-0.0912874	0.695605	-0.51534	-0.381298	-0.830007
		1818	-0.14157	0.925004	0.00537658	-1.00867	-0.141356	-0.180397	-0.722768	-0.531751	-0.0912874	0.695605	-0.116956	0.0717159	0.0861616
		1819	0.926234	-2.41687	-0.677084	-1.00867	-0.141356	-0.180397	-0.722768	-0.531751	-0.0912874	-1.43628	-0.175516	-0.722238	-0.790516
		1821	1.19005	-2.41687	-1.41021	0.160363	-0.141356	-0.180397	-0.722768	-0.531751	-0.0912874	-1.43628	0.887409	-1.48086	-0.0353422
		1825	1.19005	-0.634538	0.916495	0.170927	-0.141356	-0.180397	-0.722768	-0.531751	-0.0912874	-1.43628	0.968251	-1.07066	-0.558144
		1826	1.51248	-0.946447	-0.322063	-1.00867	-0.141356	-0.180397	1.54881	-0.531751	-0.0912874	0.695605	0.550617	-0.604176	-0.619098
		1827	1.51248	-0.946447	1.09291	-1.00867	-0.141356	-0.180397	-0.722768	-0.531751	-0.0912874	0.695605	0.567194	-0.754802	0.138716
		1830	-0.357644	0.720036	1.49004	-0.0295645	-0.141356	-0.180397	-0.722768	-0.531751	-0.0912874	0.695605	-0.916042	0.146347	-0.785877

## Sheet: Hepatocyte Intrinsic Clearance
						Train Set														Test set
			sl no.	LOGPcons	SAacc	ESOL	MLOGP2	TPSA(NO)	SAscore	AMW	N%	Eta_B	gmin	log(1+res)			sl no.	LOGPcons	SAacc	ESOL	MLOGP2	TPSA(NO)	SAscore	AMW	N%	Eta_B	gmin	log(1+res)
			1	-0.6881	0.337888	0.506472	-0.939921	0.39294	-0.0191489	2.29097	1.73421	-0.153035	-0.184767	0			6	1.37965	2.85658	-2.19057	-0.615314	3.24904	0.438946	0.437812	0.697834	2.03942	-2.18148	0
			3	0.289449	0.525112	-0.725051	-0.209496	0.388155	0.635401	0.183726	-0.960374	0.326021	-0.105256	0			10	-0.240073	-0.233966	0.433631	-0.322221	-0.362307	-0.618424	-0.677543	-0.421456	-0.469331	0.271768	0
			4	0.140983	-0.482163	-0.354284	-0.425832	-0.45171	1.37149	1.54503	-0.161977	0.304723	-0.364673	0			20	-1.1774	0.135112	1.19328	-0.789015	0.404034	-0.19644	0.237807	4.71244	-0.808255	0.611566	0
			7	-2.21778	-0.24322	2.28534	-1.08151	-0.382972	-1.22587	-0.686338	0.117462	-1.10422	0.602551	0			24	-1.0166	0.472625	0.378901	-0.932549	0.366837	0.28843	-0.204251	0.445498	0.629886	-0.187801	0
			8	0.111182	-0.155859	-0.00556458	-0.35843	0.023365	0.276867	-0.745457	0.237221	0.187898	0.0312846	0			34	-0.264759	-0.307601	0.355038	-0.161877	-0.132818	-0.621996	-0.555762	0.526296	-0.643748	1.00375	0
			9	0.649282	-0.596055	0.436287	0.347062	-0.824765	-1.16646	-1.26579	-0.960374	-1.31967	0.774729	0			41	0.341272	0.843606	-0.7855	-0.330639	1.20627	-0.288746	-0.120576	0.0997921	0.663317	-1.68011	0
			12	0.116258	0.798418	-1.52427	-0.87478	0.753379	0.447017	3.50095	-0.344468	0.471431	-0.0212753	0			45	-1.98658	-0.437193	2.06648	-0.911125	-0.126727	1.45799	0.331476	0.47674	-0.778837	-0.988266	0
			18	1.87626	0.672373	-2.31094	2.21933	0.847567	0.461231	0.786219	0.697834	0.743454	-0.058314	0			53	-1.18059	-0.331965	0.991769	-0.994022	0.153445	0.725348	-0.428661	0.616946	0.144036	-1.26607	0
			19	-1.55572	-0.531633	1.56555	-1.08718	-0.466936	-0.471739	0.0785454	2.63241	-1.31915	0.892464	0			58	-0.900812	0.675431	0.703086	-0.826268	0.728799	0.916303	-0.347427	0.787467	0.522017	-0.0617711	0
			21	-1.41737	1.52038	0.669573	-1.0279	2.29454	0.612861	0.573952	2.04754	0.837219	-2.02033	0			68	-1.4186	1.15899	0.565623	-0.820426	0.929357	1.14814	0.125507	0.445498	0.885335	-0.0140398	0
			22	3.19724	-0.904	-2.75475	4.75618	-1.00314	0.15589	-0.657622	-0.612685	0.653328	0.539305	0			81	-0.646917	-0.718199	0.803401	-0.548793	-0.698818	-1.76414	0.22899	0.579391	-0.972248	0.958488	0
			23	-1.88075	-0.972816	1.85428	-0.943218	-0.982906	2.0458	-0.71578	2.95903	-0.826145	1.22076	0			92	-1.46214	-0.307601	1.48031	-0.994272	-0.132818	-1.70699	-0.582522	1.73421	-0.972248	0.953693	0
			26	-0.426212	-0.144923	0.623527	-0.569349	-0.252674	-0.673149	0.231296	-0.960374	-0.501867	-0.0103509	0			103	-1.98744	-0.0515228	2.15154	-1.0851	0.00117748	-0.411021	-0.381656	1.09265	-0.972762	0.369731	0
			27	-1.03531	0.522365	0.533996	-0.294478	1.22084	0.553912	0.2477	2.44332	-0.189328	0.181199	0			110	-2.86128	-0.0828037	3.00265	-0.989194	0.128865	-1.13121	-1.13437	2.27313	-1.48366	0.943272	0
			30	-0.943045	-0.551165	1.00388	-0.815299	-0.561342	-1.51869	-0.553924	0.836018	-0.757316	0.490541	0			118	0.879293	-1.1288	0.301756	1.35242	-1.26482	-2.063	-1.38829	-0.960374	-1.48366	1.32188	0
			35	-0.436854	-0.170308	0.472681	-0.503507	0.0679577	-1.23916	-0.355907	0.636419	-0.643748	0.958725	0			126	-2.05115	-0.184178	2.44468	-1.08211	-0.222438	-1.0707	-0.864654	-0.960374	-1.48366	0.590942	0
			37	1.21478	0.771746	-1.58987	1.35017	0.480603	0.297005	0.0500203	1.07328	0.66741	-1.94686	0			135	-1.195	3.02534	-0.632368	-1.0873	2.95321	2.98643	-0.768507	-0.77769	3.92282	-0.569976	0
			38	0.0231916	-0.283898	0.173154	0.0504693	-0.168275	-1.60998	-0.40115	1.26963	-0.899196	0.769954	0			141	0.0439926	-0.638942	-0.662727	0.0705062	-0.491952	3.28939	2.69987	-0.960374	0.888592	-0.494748	0
			42	0.725302	-0.991505	-1.08761	1.033	-0.992259	3.78606	2.92381	-0.960374	1.05503	-0.29359	0			147	-0.41383	-0.616715	0.593251	-0.42522	-0.291176	0.839204	0.873241	-0.960374	-0.92481	-1.42982	0
			43	-2.17242	1.08016	2.19684	-1.08882	0.636351	0.068717	-0.974121	-0.13127	0.231944	0.300096	0			153	1.48462	1.71683	-1.75774	0.236558	0.402729	0.865919	1.23092	0.0911729	1.87093	-2.66004	0
			44	0.970084	-0.904	-0.677188	1.71097	-1.00314	0.819759	-0.739297	-0.470449	-0.540164	0.700283	0			163	2.66783	-0.226532	-1.32289	3.71238	-0.120637	-0.730621	-0.872764	-0.960374	-0.76581	0.302672	0
			47	-1.65531	-0.0243181	2.0872	-1.05249	-0.314234	-1.48185	-1.05987	-0.241817	-1.31967	0.656136	0			175	0.825169	1.2743	-1.33464	-0.250713	0.577619	0.598726	2.11199	1.91385	1.64777	-2.40144	0
			49	2.69112	-0.226532	-1.09704	2.3585	-0.120637	-0.189811	-1.06534	-0.960374	-0.644776	0.519659	0			185	-0.836747	1.41405	0.165182	-0.830629	1.09772	2.36157	-0.174155	-0.960374	0.706361	-0.409236	0
			51	-0.220467	0.214728	-0.173919	-0.410289	0.227621	0.259211	0.0669084	0.0911729	0.282982	0.1227	0			194	-0.642033	-0.0506898	0.846271	-0.472298	0.0997163	-0.250757	-0.131525	3.35097	-0.89971	0.662869	0
			55	1.07837	-0.0088714	-1.68788	0.901972	0.201953	2.40147	-0.816143	-0.440935	1.98314	-1.20792	0			205	-1.67456	0.0712321	1.42104	-1.05798	0.256769	0.427614	-0.138745	3.03161	-0.684264	0.367844	0
			56	-1.34336	-0.122461	0.836818	-1.03263	0.0903627	-0.731935	-0.197627	0.787467	-0.331691	-1.38714	0			209	-0.137006	-0.282215	0.978537	-0.0338199	-0.45345	-1.85376	-1.00065	-0.960374	-1.13676	0.175433	0
			57	-1.24005	-0.0574181	1.26316	-0.955384	-0.191767	-1.26028	-0.306943	0.117462	-0.7168	0.48767	0			213	-1.51457	1.81657	0.667369	-1.00001	1.23802	1.46944	-0.440296	-0.960374	1.6326	-0.703705	0
			60	-1.16314	0.999191	0.708437	-0.977723	1.58846	0.0404248	0.337128	-0.361576	0.829623	-1.52835	0			218	1.94311	-0.815217	-1.84736	1.65838	-0.792789	0.190399	-0.807293	-0.656758	0.957081	0.686083	0
			64	0.529531	0.215135	-0.84578	0.276847	0.321809	0.848658	0.435888	0.999327	0.412511	0.366893	0			229	-0.173302	-1.1288	0.49925	-0.366814	-1.26482	0.889288	6.61794	-0.960374	-0.830368	0.496864	0
			65	0.41073	2.45025	-2.09812	-0.881126	2.61496	3.89776	-0.712874	-0.789289	2.78811	-0.860288	0			236	0.46922	1.14201	-1.35144	-0.116485	1.32656	1.56316	-0.161944	0.970077	0.950406	0.0328611	0
			69	1.92394	-0.95251	-1.50806	2.1431	-0.993564	-0.0385345	-0.665783	-0.582186	-0.313319	0.942129	0			240	3.16381	1.14683	-2.84435	3.31915	-0.0133967	1.81645	-0.535568	-0.960374	1.94803	-2.56659	0
			71	-1.52519	-0.59016	1.70679	-1.05005	-0.63182	-1.69525	-0.859535	0.17419	-1.2277	0.678814	0			248	-0.142447	-0.226532	0.607215	-0.0493237	-0.120637	-0.343095	-0.259605	-0.960374	-0.76581	0.224705	0
			77	-0.109382	-0.596055	0.777885	-0.25531	-0.824765	-1.06171	-1.07918	-0.960374	-0.881307	0.646611	0			260	0.0471274	-0.616505	-0.336939	-0.453623	-0.5	-0.279623	-0.347987	1.09265	-0.148811	1.12955	0
			87	-2.68042	0.763557	2.64418	-1.07788	1.13318	-0.840989	-0.602686	2.35604	-0.972762	0.429029	0			265	0.61892	-0.387304	-0.68317	1.21994	-0.32424	1.32438	0.245441	0.836018	-0.112227	0.204276	0
			89	-0.547886	0.0686881	0.0968163	-0.86988	0.664846	0.751221	-0.304937	0.636419	0.106637	0.131961	0			272	1.19902	0.43271	-1.10174	0.555691	0.450802	0.37311	-0.651453	-0.335542	0.412511	-0.033387	0
			90	0.491571	-0.178575	-0.30239	0.835474	-0.156746	0.337165	-0.44472	0.543582	0.407231	0.0680142	0			280	0.807694	-0.616715	-0.904926	0.846855	-0.291176	1.0857	1.33229	-0.960374	-0.43283	-1.69507	0
			96	-0.940088	-0.596055	1.12823	-0.818555	-0.824765	-2.38146	-0.416968	-0.960374	-1.2277	0.733529	0			287	0.522805	-0.095754	-0.507724	0.194578	-0.352736	0.180417	-0.571798	-0.568434	-0.149325	0.236818	0
			98	-0.390671	-0.343189	0.0817809	-0.487127	-0.173713	1.10003	-0.621122	0.874239	0.0256048	0.533911	0			297	-1.55553	-0.263879	1.55961	-1.03392	0.150617	-0.108338	-0.274778	-0.264996	-0.107525	-1.45262	0
			100	-1.39897	-1.01013	1.53378	-1.08673	-0.97899	-1.60333	-0.305065	-0.960374	-1.48315	1.46698	0			302	0.0848008	0.596426	-0.528589	-0.311439	0.558694	0.194955	0.220133	-0.960374	0.503775	-1.67323	0
			105	0.102096	-1.1288	0.837151	0.388089	-1.26482	-2.10574	-1.42754	-0.960374	-1.48366	1.31502	0			306	2.63126	0.136794	-2.72392	2.79649	0.321809	0.874451	-0.341438	0.28929	0.899467	0.0342426	0
			106	-0.239663	-0.419768	0.309273	-0.447328	-0.553511	0.0542956	-0.801975	-0.470449	-0.214236	0.152166	0			310	0.745755	0.155545	-0.768965	-0.157191	-0.339902	0.622385	-0.289698	-0.0981055	0.23109	-2.10237	0
			107	1.10634	0.416655	-1.34666	0.440948	0.461895	0.00822444	-0.11922	0.897963	0.270631	0.269929	0			321	-0.367301	-0.282215	1.07759	-0.582361	-0.45345	-1.14258	-1.00065	-0.960374	-1.01328	0.19078	0
			111	-0.511694	0.12991	0.441113	-0.71935	0.183028	0.0611264	-0.003082	0.579391	-0.294915	0.0782257	0			327	-0.528614	-0.551165	0.567878	-0.569349	-0.561342	-1.22403	-0.0589853	0.836018	-0.501867	0.467677	0
			114	0.624054	-1.1288	0.477423	1.02169	-1.26482	-2.08114	-1.39835	-0.960374	-1.48366	1.32054	0			337	-0.810952	0.137351	0.575069	-0.832599	0.622864	0.791282	0.679706	2.88904	-0.213883	0.148115	0
			115	-1.40498	-0.458763	1.9447	-1.02998	-0.623989	-1.35924	-1.061	-0.960374	-1.48366	0.632686	0			343	0.732889	-0.27632	-0.677291	0.5636	-0.260505	0.60879	0.311356	-0.361576	0.330723	-0.00884645	0
			120	-0.518938	-0.283133	0.428369	-0.769684	-0.127597	0.406069	0.572909	2.4887	-0.775719	0.828871	0			349	-1.51913	0.529766	1.09857	-1.06675	0.948064	-0.254257	-0.353685	0.445498	0.257363	-1.62606	0
			123	0.836268	0.172859	-0.809776	1.10117	-0.396023	0.991937	0.86131	0.941688	0.426272	-2.00381	0			358	-0.468525	0.0866026	0.713567	-0.326211	0.300492	-0.117477	-0.693483	2.11916	-0.297357	0.700443	0
			125	-1.98014	-0.579627	2.39276	-1.08211	-0.461716	-1.11128	-0.864654	-0.960374	-1.48366	0.900322	0			367	-1.88445	0.345081	1.79286	-1.08702	0.580447	0.156515	-0.175781	0.579391	0.22419	-1.28676	0
			128	-0.232182	0.256422	0.20508	-0.446885	0.179548	-0.506767	0.722146	-0.13127	0.037634	-0.165012	0			374	-0.672914	-0.0727104	0.678625	-0.87444	-0.17306	-0.390785	1.81604	0.579391	-0.542383	-0.113255	0
			129	-1.02402	-0.283898	1.02753	-0.797122	-0.109543	-0.279174	-0.589155	1.52694	-0.72478	0.651198	0			380	0.745995	0.300742	-2.14251	0.747842	0.766866	1.44659	3.4505	-0.960374	1.01923	-0.205831	0
			131	-0.485795	-0.452868	0.62949	-0.475763	-0.431045	0.103707	-0.67852	-0.361576	-0.856752	0.451615	0			388	-1.51675	0.367486	1.08174	-1.06565	1.44206	0.892131	-0.413258	0.666547	0.256499	-0.401466	0
			136	-0.588055	-0.315575	0.791779	-0.795011	-0.230269	-0.915425	-0.508137	-0.241817	-0.593322	0.268348	0			394	-1.18252	0.694225	1.18329	-0.936132	0.317024	-0.00018953	-0.741632	-0.393092	0.125503	0.185139	0
			137	-1.19635	0.812724	0.940253	-0.974508	0.929574	0.917637	-0.345211	0.616946	0.430562	-0.0830042	0			404	-0.404409	-0.0506898	0.622991	-0.287941	0.0997163	-0.1407	-0.256833	2.88904	-0.552806	0.66141	0
			140	-0.657359	0.563164	0.357417	-0.93356	1.01506	0.0760069	-0.194073	0.19445	1.13038	-1.29678	0			411	2.31096	-0.520005	-2.67946	2.02596	-0.336421	0.0306444	0.79566	-0.601095	0.148568	0.561086	0
			143	1.7552	0.596426	-3.03624	0.941707	0.558694	0.485035	3.01085	-0.960374	1.3635	-1.73661	0			418	-0.953306	-1.1288	1.43356	-1.08363	-0.662491	0.771333	-0.793033	-0.960374	-0.92481	-0.713495	0
			144	1.2839	-0.0574181	-1.35909	1.15732	-0.191767	-0.768247	1.56981	-0.161977	0.215982	0.234729	0			423	1.60108	-1.1288	-1.42645	2.59291	-1.26482	-0.558184	-0.194504	-0.960374	-0.493273	1.29702	0
			145	-0.626006	0.203613	0.355742	-0.775024	0.442971	-0.305886	-0.356445	0.579391	-0.00359319	-1.60013	0			430	-0.408278	0.705873	0.107629	-0.830988	1.04834	-0.0904726	-0.209091	0.836018	-0.140831	0.258145	0
			148	-1.16734	-0.208001	1.40163	-1.0155	-0.162184	0.236173	-0.389641	0.697834	-0.523388	0.241432	0			439	-0.594155	0.33697	0.67206	-0.596637	0.617208	0.041836	-0.0510119	3.49963	-0.194887	0.127102	0
			151	0.126005	0.662343	-0.48535	-0.312093	0.658103	0.301488	-0.0409525	-0.0981055	0.706276	-1.55705	0			452	0.302487	0.623969	-0.239977	0.816108	-0.0133967	-0.447832	0.405099	-0.960374	-0.0394664	-0.191748	0
			152	1.37367	0.920561	-0.515974	1.08499	0.627432	-1.19956	-0.7521	-0.960374	-0.418906	0.193538	0			460	-1.95016	0.144835	1.85339	-1.06401	0.27961	0.323689	-0.112685	1.43482	-0.542897	0.155426	0
			154	1.77678	1.33827	-2.20012	0.460624	1.38464	0.437674	0.223731	-0.31689	2.4469	-1.84665	0			469	1.99698	-1.05081	-1.89979	3.37009	-0.81998	1.09577	-0.74136	-0.109451	-0.00180722	1.06027	0
			159	2.15724	0.168918	-3.0297	2.029	0.118641	0.607945	2.27486	-0.960374	0.761344	0.302887	0			480	0.333578	-0.655501	-0.177699	0.307389	-0.605065	0.0809432	-0.664542	0.616946	-0.0394664	0.865426	0
			162	2.34448	-0.226532	-1.22513	2.42993	-0.120637	0.219758	-0.872764	-0.960374	-0.437824	0.302593	0			489	-2.10207	3.29891	0.602134	-1.00997	3.21772	1.75282	-0.157021	-0.643363	1.92488	-0.708608	0
			164	0.524162	-0.815217	-0.142721	0.201078	-0.792789	0.216725	-1.08153	-0.575432	0.208352	0.410659	0			496	-2.23315	1.45595	1.7712	-1.03622	2.20014	0.100404	0.529871	5.60036	-0.072002	0.0844496	0
			169	0.0246088	-0.741137	0.16777	-0.0455529	-0.747326	-0.598604	1.64954	0.697834	-0.889287	0.743083	0			504	-0.297481	0.389415	-0.168399	-0.320822	0.747288	0.313276	0.240679	0.656379	0.687742	-1.69967	0
			174	0.0583314	-0.307601	0.00449193	0.0219628	-0.132818	-0.224631	-0.625635	0.38692	-0.254399	1.01931	0			516	1.21697	1.3406	-2.09202	0.87087	1.20735	1.39698	-0.0137248	0.887344	1.75865	-2.1128	0
			178	0.662993	-0.596055	-0.408229	0.75679	-0.824765	-0.934052	-0.0130312	-0.960374	-0.684264	0.718289	0			524	0.723889	-0.503342	-0.889636	1.59509	-0.327938	0.170068	0.128869	1.50325	-0.229844	0.832371	0
			179	-0.0143949	-0.144923	0.187958	-0.252909	-0.252674	-0.469187	0.771229	-0.960374	-0.286935	-0.0358633	0			528	-1.46985	0.490473	1.49892	-0.987408	0.575009	-0.159353	-0.673207	0.0911729	-0.205902	0.243799	0
			184	-0.133657	-0.458763	0.42497	-0.34739	-0.623989	-0.670173	-0.770079	-0.960374	-0.154098	0.520413	0			534	-0.564201	1.59274	0.434357	-0.750939	-0.0821346	0.278043	2.83663	-0.960374	1.91953	-3.59484	0
			186	-0.338745	0.137974	0.567113	-0.490353	0.728581	-0.448746	0.392469	1.30875	-0.327451	0.180853	0			544	-0.722461	-0.718199	1.00575	-0.488878	-0.698818	-0.576994	-0.886188	-0.0231257	-0.972248	0.702211	0
			187	0.688448	0.406222	-1.08383	-0.32672	0.733149	-0.0159051	-0.160236	1.12576	0.47514	0.373343	0			551	0.0805006	1.77172	-0.0257602	0.069331	-0.45345	0.0104541	2.50213	-0.960374	2.05579	-3.76998	0
			189	-0.653327	-0.275487	0.574118	-0.28713	0.181506	0.33041	-0.139073	2.88904	-0.907177	0.933142	0			557	0.353732	0.700121	-0.524383	0.119758	0.591758	0.37708	-0.538834	-0.203998	0.353591	0.140843	0
			197	0.278903	0.0959429	-0.360012	-0.120272	0.0314135	0.0374719	-0.663039	-0.217039	0.432021	0.319972	0			563	2.02171	-1.1288	-1.7626	3.1974	-1.26482	-0.715674	1.66343	-0.960374	-0.254399	0.844387	0
			199	-0.0990457	0.600759	-0.338154	-0.401484	0.60568	0.535668	1.13301	1.65256	1.10922	-1.50089	0			575	-1.81396	0.490771	1.53148	-1.08165	0.877586	-1.03241	0.262771	0.764163	-0.1681	-1.62467	0
			202	-1.521	1.62386	0.749748	-1.06309	2.35784	0.41692	0.393175	1.43482	0.832576	-2.03932	0			582	2.70536	-1.1288	-2.52671	3.91336	-1.26482	-0.00697591	2.7433	-0.960374	0.175466	0.762775	0
			206	-2.49142	-0.0545812	2.41781	-1.07845	0.164756	-0.538295	0.307907	2.63241	-0.972248	0.382883	0			588	-0.587285	-0.321973	0.572461	-0.543781	-0.418428	-0.580831	0.711948	1.73421	-0.684264	0.412351	0
			207	-0.131307	0.21092	-0.00356048	0.102824	0.57044	0.338924	0.710426	0.430381	-0.181861	-0.214629	0			596	0.411761	-0.782	-0.214477	0.0883526	-0.676413	0.421628	0.192155	0.346093	-0.560787	0.45707	0
			208	-2.07251	-0.854212	2.21126	-1.06289	-0.863267	-1.12111	-0.743149	-0.960374	-1.48315	0.99017	0			604	-0.532549	0.0348787	0.206221	-0.506427	0.250026	-0.0736174	-0.660096	0.866466	-0.023406	0.55625	0
			210	1.1315	-1.1288	0.128306	1.69124	-1.26482	-2.04234	-1.38011	-0.960374	-1.48366	1.3228	0			611	-0.696727	0.618512	0.798288	-0.787753	0.642006	-0.0279972	-0.682279	-0.13127	0.132508	0.175247	0
			211	0.158897	-0.48101	-0.509646	-0.346909	-0.265943	1.27935	-0.671745	-0.253596	0.183546	0.589314	0			616	0.806643	2.5186	-0.834179	0.988998	-0.45345	0.23153	2.57906	-0.960374	3.259	-4.21482	0
			212	1.34565	-0.595279	-1.27956	1.11678	-0.783653	-0.423984	0.881598	-0.190491	-0.181347	0.373581	0			621	0.85174	0.357713	-1.31317	-0.0705158	0.74272	0.19033	-0.575416	0.597942	0.558615	0.489119	0
			214	0.152225	0.475324	-0.431838	-0.13422	0.248286	-0.0788844	-0.107438	-0.407638	0.0544003	-0.019275	0			628	0.820589	0.362771	-0.372623	0.413677	0.990264	-0.429284	-0.4259	0.697834	0.134436	0.226475	0
			216	0.976016	0.596426	-1.3871	0.32127	0.558694	0.565231	-0.137798	-0.960374	1.3635	-1.70655	0			636	-0.660555	0.657786	0.421153	-0.691271	0.812546	-0.808206	0.136221	0.237221	-0.0950486	-1.53762	0
			217	-0.233482	1.1791	-0.0851057	-0.0279759	1.93432	0.660954	0.171382	0.836018	0.219178	-0.333251	0			642	0.612075	-0.0499837	-0.911953	0.722832	0.0499031	1.73895	-0.434451	-0.960374	1.60901	-0.0279508	0
			220	-1.03782	0.134279	0.898747	-0.863009	0.305495	0.129015	-0.486053	0.346093	-0.268754	0.225055	0			646	0.653945	-0.638669	-0.689531	0.117493	-0.515009	0.853564	-0.589287	-0.13127	0.0698663	0.445636	0
			221	0.163741	0.783269	-0.0553015	-0.093447	0.426656	-0.341546	-0.381681	-0.960374	0.132669	0.0750082	0			652	0.644137	0.168918	-0.0232172	0.474974	0.118641	-0.212093	-0.628016	-0.960374	-0.510362	-0.0751761	0
			226	0.585028	-0.616715	0.358541	0.160136	-0.291176	-0.607585	-0.82615	-0.960374	-0.92481	-1.3095	0			658	-1.76042	0.246835	1.73369	-1.0662	0.559564	-0.296221	-0.102612	2.11916	-0.674355	0.260815	0
			232	-0.0310631	1.9928	-0.89248	-0.771459	2.36241	1.49769	-0.576599	0.346093	2.09473	-0.178632	0			671	-0.380179	0.923099	-0.0969858	-0.786924	0.992657	1.09234	-0.341624	-0.217039	0.852799	-0.023522	0
			233	0.0842768	0.567894	-0.734557	0.362941	1.31655	0.97726	-0.35177	1.82114	1.39997	0.0345984	0			685	-1.21034	-0.307601	1.26018	-0.903945	-0.132818	-0.676152	-0.695977	1.30875	-0.757316	0.920135	0
			234	0.773421	-0.596055	-0.330338	0.748144	-0.824765	-0.201955	-0.990442	-0.960374	0.591514	0.547615	0			691	0.627627	0.183246	-0.651395	-0.102191	0.420783	-0.0499807	-0.273393	-0.115013	0.066121	0.0975857	0
			237	0.996523	-1.1288	-0.776109	1.61805	-1.26482	-1.5888	-0.230984	-0.960374	-0.700225	1.30377	0			704	1.48326	-1.05081	-1.41561	0.879379	-1.0871	0.247366	-0.407567	-0.115013	-0.280783	0.960298	0
			238	0.00941614	-0.605452	-0.197235	-0.28007	-0.162401	1.20192	-0.445906	0.616946	-0.0554277	0.562717	0			717	-1.00057	-0.140566	1.13614	-0.737318	0.00465788	-1.05333	-0.777756	0.741471	-0.684778	0.527517	0
			239	0.00941614	-0.605452	-0.197235	-0.28007	-0.162401	1.20192	-0.445906	0.616946	-0.0554277	0.562717	0			724	1.01809	-0.40308	-0.831914	0.511937	-0.291176	-0.197446	0.354852	-0.960374	-0.0498893	0.170732	0
			242	1.44458	-1.05081	-1.21547	1.80298	-1.12386	0.0816524	-0.678892	-0.115013	-0.00693081	0.689822	0			728	0.470854	0.798418	-2.30149	-0.713332	0.753379	0.782262	4.74153	-0.344468	0.686364	-0.0214967	0
			243	0.179773	-0.386551	-0.546482	0.272427	-0.544375	-0.0255962	2.93972	0.237221	-0.550364	0.662191	0			732	-1.08209	0.0280026	0.879087	-1.06658	0.190642	-0.765447	0.38921	2.78862	-0.899196	0.384263	0
			245	1.82598	-0.0330156	-1.77257	1.24395	0.268733	-0.00314757	-0.429856	-0.203998	0.588739	0.458346	0			750	-0.993163	0.878208	0.43592	-0.841085	0.729234	1.06805	-0.536424	-0.960374	1.13382	-0.360718	0
			254	-0.265179	0.168918	0.64703	-0.295795	0.118641	-0.693884	-0.358794	-0.960374	-0.674355	-0.0791015	0			761	-0.961422	-0.880297	1.02552	-0.896081	-0.91395	0.24833	-0.761607	0.697834	-0.980229	0.895695	0
			258	0.52337	-0.178575	-0.568838	0.987102	-0.156746	0.515352	-0.303888	0.579391	0.361096	0.0289318	0			769	0.707064	-1.05081	-0.842353	1.125	-1.05839	0.579904	-0.698481	0.154628	0.46345	1.22936	0
			259	0.418432	-0.880297	-0.209708	0.0876091	-0.91395	0.265978	-0.419691	0.17419	-0.469331	0.732678	0			776	0.981984	0.737132	-0.696273	0.935897	0.799059	-0.46922	0.192861	0.787467	0.96108	-2.22271	0
			261	0.226449	-1.01013	-0.0713088	-0.112639	-0.97899	-1.32506	-0.151555	-0.960374	-0.947693	1.09371	0			783	-2.15334	0.190681	2.09748	-1.05968	0.621994	-0.0777102	0.120345	-0.960374	0.217934	-1.36034	0
			262	-0.0970252	3.53484	-1.98968	-1.0512	3.524	4.68595	-0.487806	-0.223392	3.60189	-0.59708	0			791	0.0381625	-0.23624	0.218546	-0.499018	0.334208	-0.425614	0.225525	-0.286727	-0.289922	-1.03269	0
			263	1.6104	0.347194	-1.38564	0.454746	0.857574	-0.362236	0.385819	1.66849	0.0330715	0.225943	0			798	1.6437	-0.71692	-1.48703	1.61493	-0.662491	0.351731	-0.177187	-0.960374	-0.240781	0.923984	0
			266	-0.468744	0.128383	0.483158	-0.446867	0.11255	-0.899954	1.26596	0.307668	-0.327451	-0.0915253	0			804	-0.674925	-0.0515228	0.475491	-0.704601	0.00117748	-0.304758	-0.10711	0.430381	-0.424364	-0.0887244	0
			269	1.57853	1.50863	-1.73473	0.917282	1.16689	0.936061	-0.378574	-0.393092	1.1813	-0.111748	0			810	-1.06593	0.458647	0.72224	-0.955412	0.866275	-0.429409	-0.00464975	1.65256	0.251856	-1.52658	0
			270	-0.223907	-0.775962	0.52326	-0.138685	-0.823025	-0.944337	-0.785682	-0.264996	-0.725294	0.622119	0			821	1.79206	-1.1288	-1.55607	2.69169	-1.26482	-0.717068	-0.457973	-0.960374	-0.310876	1.29386	0
			274	-0.897341	-0.233966	0.96715	-0.885628	-0.0188348	0.673898	-0.659853	0.17419	-0.469331	0.271888	0			825	-0.737743	-0.701029	0.683401	-0.446885	-0.608545	-0.690943	-0.567407	0.941688	-0.161015	0.56089	0
			275	-0.754673	-0.283133	0.788398	-0.769684	-0.127597	0.266389	0.0401637	2.35604	-0.593322	0.820197	0			833	0.561231	-0.363824	-0.190254	0.291273	-0.321412	0.900289	-0.740819	-0.960374	0.659496	0.332911	0
			276	-2.16916	2.43228	0.904251	-0.992046	2.3163	1.30415	-0.284007	0.117462	1.94591	-0.925254	0			840	0.679423	-0.596055	-0.545494	0.474329	-0.824765	-0.632455	3.23796	-0.960374	-0.367967	0.413176	0
			281	1.47966	-0.307601	-1.03546	1.57181	-0.132818	-0.758337	-0.893261	-0.146913	-0.149839	1.08428	0			845	-1.91871	2.90555	1.15222	-1.08629	3.37456	0.511669	0.0713768	1.99839	0.799932	-0.186936	0
			283	-0.175991	-0.551165	0.467968	-0.330449	-0.561342	-0.401774	-0.841289	0.145098	-0.469845	0.586892	0			851	-0.326295	0.575638	0.454744	-0.958717	0.945236	0.903192	-0.815591	0.117462	0.215982	0.344442	0
			284	-0.910908	0.18586	0.778015	-0.77758	0.613293	0.288192	0.35217	3.03161	-0.428815	0.154235	0			856	-1.75094	0.778934	1.63049	-1.08608	1.48557	-0.116816	0.503238	3.35097	-0.501867	0.0846611	0
			288	0.78124	0.337888	-0.75422	0.721191	0.39294	0.0871753	-0.473987	-0.0430671	1.3904	0.37798	0			863	-0.0752121	0.152086	-0.167185	0.071032	0.0770937	0.289523	0.276068	0.430381	-0.221863	-0.254534	0
			291	-1.20534	-0.282215	1.66588	-0.995332	-0.45345	-1.26692	-0.611724	-0.960374	-1.13676	0.0609741	0			867	-1.93573	-0.865005	2.00278	-1.0893	-0.814106	0.159587	0.115512	2.35604	-1.01276	0.982354	0
			292	-1.21004	16.8384	-3.11328	10.3581	15.6582	4.89865	0.458218	-0.960374	9.36501	-1.20243	0			879	-0.931871	0.135112	0.967575	-0.640195	0.404034	-0.0795498	0.0279594	3.93888	-0.461351	0.610107	0
			298	-1.07228	-0.718199	1.22897	-0.818555	-0.698818	-2.26775	-0.619476	0.579391	-1.2277	1.01492	0			889	-2.03283	3.00718	0.419234	-0.998741	3.52639	1.74379	0.222855	1.77217	1.72666	-0.24895	0
			299	0.5409	-0.0515228	-0.531412	0.158004	0.00117748	-0.249883	-0.496446	-0.0231257	0.382418	0.495521	0			901	0.154512	0.631651	-0.169515	-0.174323	1.13775	0.292884	-0.337507	-0.13127	0.688292	0.00266962	0
			300	-0.480693	1.37556	0.296353	-0.443018	2.36741	0.463196	-0.293115	0.67271	1.78525	-1.66829	0			907	0.56685	0.475324	-0.534453	0.118847	0.248286	-0.656567	0.559001	-0.264996	0.00104982	0.0298646	0
			303	-0.453536	1.38462	-0.346227	-0.29516	2.03156	0.901314	1.45147	1.73421	0.754259	-1.98504	0			914	-0.699391	0.167677	0.706134	-0.84214	0.372493	-0.547154	-0.323556	0.237221	-0.1681	-1.57232	0
			304	-0.842853	-0.703106	1.20634	-0.888621	-0.491952	-0.227148	-0.694246	-0.960374	-0.0850282	-1.02605	0			921	-1.0965	1.98605	0.529672	-1.08313	1.59259	0.0977825	0.343655	-0.960374	0.422934	0.037199	0
			305	-1.2655	1.17511	0.597756	-1.0051	1.70614	0.253911	0.13353	0.914122	0.754772	-1.89551	0			927	-0.604014	0.0406189	0.911942	-0.785382	0.0392444	-0.0423916	-0.835069	-0.561175	-0.205902	0.263951	0
			307	0.654122	1.31679	-0.662913	-0.238852	0.907822	0.964037	-0.548083	-0.638632	1.02477	-0.0995593	0			931	-0.643807	0.837413	0.526031	-0.760561	0.710744	0.662434	-0.489538	-0.0805082	-0.141345	0.133547	0
			308	0.261193	0.580037	-0.633066	0.0572205	0.877368	0.67849	1.08928	2.11916	0.582285	-1.82952	0			935	-1.67683	-0.596055	2.03847	-1.07523	-0.824765	-2.35614	-1.18639	-0.960374	-1.0453	0.45865	0
			309	-2.02634	0.70166	1.90821	-1.0892	0.558694	1.19888	-0.122149	-0.960374	-0.335431	-0.0418125	0			946	-0.353292	1.15093	-0.440675	-0.915505	1.14471	-0.376609	0.560087	0.914122	0.824004	-1.74592	0
			313	0.27538	-0.95251	0.0450728	0.182475	-0.993564	-0.567719	-0.711947	-0.421456	-0.72478	0.561489	0			951	-0.841434	0.661902	0.71729	-0.88863	0.593716	0.0988091	1.48415	1.1953	-0.112518	-0.150099	0
			315	0.562869	1.41168	-1.0468	-0.226546	1.90343	0.585717	-0.115886	0.624678	1.25855	-1.77723	0			960	-0.223665	0.201991	0.063157	-0.323916	0.594803	-0.0968431	-0.596596	1.12576	0.0348884	0.342452	0
			319	-0.627642	-0.709788	0.484977	-0.811314	-0.360567	0.375548	0.391587	2.11916	-0.907177	1.02532	0			967	-1.21796	0.249142	0.914176	-1.04259	0.585885	-0.871912	0.608779	1.62643	-0.259042	-1.44974	0
			323	-0.33508	0.237237	0.301143	-0.761421	0.216962	0.659133	-0.4053	-0.50172	-0.477826	0.530211	0			973	0.435333	-0.00173471	-0.503049	0.147119	0.141046	0.232584	0.0981946	-0.470449	0.341388	0.137628	0
			324	-1.5502	0.128383	1.53368	-1.08954	0.11255	-1.01444	-0.131508	0.307668	-0.757316	0.0287442	0			978	0.844495	-0.904	-0.603992	1.36667	-1.00314	-0.290244	-0.698191	-0.4346	-0.824216	1.12742	0
			326	0.688335	0.158901	-1.22797	0.747708	0.422306	1.33569	-0.00566879	0.697834	0.520541	-0.113584	0			993	-1.21615	1.38462	0.657039	-0.757627	1.98653	0.134878	0.294461	1.66849	0.49881	-1.89933	0
			329	1.89598	0.525112	-3.186	0.816411	0.388155	1.11891	3.1253	-0.960374	1.10472	-0.193426	0			1004	-0.481485	-0.568634	0.794953	-0.695019	-1.26482	0.209128	7.35787	-0.960374	-0.486889	-1.80422	0
			330	-0.436698	0.0291783	0.144271	-0.474717	0.351175	0.15776	-0.142405	1.87603	-0.230358	0.550041	0			1010	-0.0564805	-0.568634	0.324169	-0.163582	-1.26482	0.641122	5.16402	-0.960374	0.114715	-1.82593	0
			331	-0.817856	0.0765161	0.777018	-0.85641	0.181288	0.409973	-0.46861	0.204854	-0.0680649	-0.217709	0			1017	-1.07394	0.262318	1.18351	-1.02118	0.372493	-0.474502	-0.618331	0.307668	-0.242481	-0.0628649	0
			340	-1.81677	-0.0743929	1.57319	-1.06608	0.548906	1.90343	0.690608	5.7761	-0.72478	0.71378	0			1024	0.87058	-0.775962	-0.516414	0.922501	-0.823025	0.198856	-0.779186	-0.52924	-0.11849	0.22469	0
			341	0.920252	1.61515	-1.48033	-0.811871	1.90626	1.75397	-0.376389	0.359425	1.59881	-0.0378321	0			1030	0.627937	-1.1288	-0.531512	0.423896	-1.26482	1.3959	5.63799	-0.960374	-0.00741378	-0.277618	0
			342	0.789252	1.84825	-2.57784	-0.656029	2.25604	5.119	-0.699065	-0.804166	3.28293	-0.475647	0			1046	0.775512	-0.875887	-0.696004	1.75423	-0.893503	-0.710277	-0.171593	-0.960374	-0.625295	-1.01009	0
			345	0.411132	-1.1288	-0.268687	0.58455	-1.18042	-0.475324	-0.462918	-0.264996	-0.907177	1.06956	0			1064	-1.77645	-0.0571204	1.46503	-1.08616	0.11081	-0.58483	0.802778	0.307668	-0.340074	-1.44788	0
			346	-0.576624	-0.458763	0.66665	-0.698698	-0.623989	-0.545739	-0.554067	-0.960374	-0.275406	0.459302	0			1068	-1.13295	0.675431	0.926963	-0.911488	0.728799	0.739487	-0.263282	0.941688	0.266569	-0.065992	0
			347	-0.643723	-0.315575	0.650544	-0.835183	-0.230269	-0.208137	-0.452126	-0.264996	-0.111412	0.27976	0			1074	0.166144	0.168918	-0.204595	0.137145	0.203693	0.417497	-0.18712	-0.960374	-0.0474471	0.206597	0
			353	-1.03579	0.768826	0.833397	-0.575893	1.24999	0.0389401	-0.199007	0.836018	0.622671	-1.37576	0			1082	2.12484	-0.117501	-1.94577	2.39626	-0.692727	1.23334	-0.0540738	-0.960374	1.26323	-2.04057	0
			354	-0.137931	-0.155859	-0.117629	-0.408611	-0.089748	0.504169	-0.216736	0.787467	-0.32716	0.20654	0			1090	0.703238	-0.178575	-0.672358	1.01754	-0.156746	0.611215	0.0471107	0.741471	0.440274	0.141273	0
			356	-2.18061	0.292359	2.26779	-1.08929	0.250026	-0.973258	-0.511741	0.914122	-0.534403	0.0125412	0			1097	0.0442251	-0.0727104	-0.0865627	-0.180164	-0.17306	-0.242354	1.2603	0.117462	-0.294915	-0.0648333	0
			362	0.0241257	0.25365	-0.260066	-0.0389169	0.442536	-0.0915491	0.173411	0.887344	0.167485	0.250935	0			1109	0.687788	0.75658	-1.13202	-0.612567	0.883894	0.30787	-0.078226	0.0997921	0.759193	-0.0887126	0
			363	-1.12397	-0.991505	1.5868	-0.914791	-1.06404	-1.95825	-1.22462	-0.960374	-0.632863	0.575897	0			1116	0.269081	-0.535484	0.0342307	0.15169	-0.554164	-1.04419	-0.179121	0.764163	-1.07168	0.981676	0
			366	0.298664	-1.1288	0.66708	-1.00849	-1.26482	-0.698646	-1.33578	-0.553643	-1.07078	1.31309	0			1123	-1.85912	-0.775962	2.00934	-1.08495	-0.823025	-1.53578	-0.776746	0.38692	-1.01276	0.716594	0
			370	-1.53528	-0.208001	1.71808	-1.08923	-0.162184	0.340252	-0.116211	1.1953	-0.972762	0.244166	0			1133	-1.66867	-0.775962	1.88945	-1.06345	-0.823025	-0.759043	-0.658807	0.307668	-1.10422	0.669695	0
			371	-0.0817868	-0.208395	-0.176226	-0.25271	-0.307273	-0.574506	3.90789	0.579391	-0.633839	0.617064	0			1141	-0.550831	-0.557203	0.603297	-0.47336	-0.533499	0.165575	-0.58263	0.38692	-0.682447	0.419672	0
			373	-1.03472	-0.158917	0.85882	-0.634401	0.0601268	-0.28232	0.409904	1.85137	-0.550364	0.319448	0			1147	-0.239711	-0.596055	0.393888	-0.258468	-0.824765	-1.68577	-0.296796	-0.960374	-0.980229	0.749475	0
			375	0.774301	-0.0278197	-1.46759	-0.146259	0.386632	0.429521	-0.298584	0.624678	0.768009	0.36017	0			1156	-0.648647	0.39961	0.664466	-0.489424	0.821899	-0.231304	-0.266742	0.237221	0.213509	0.173761	0
			377	-1.66506	1.75274	0.778843	-1.05867	2.40961	0.339873	0.146106	1.57571	0.877736	-2.00514	0			1167	0.367702	-0.904	-0.265609	-0.112639	-0.921346	-1.03254	0.0744466	-0.0231257	-0.907177	1.2305	0
			378	1.14212	-1.05081	-0.951822	1.19478	-1.12386	-0.502856	-0.500588	-0.00229792	-0.221863	1.0114	0			1173	-1.10132	-0.267066	1.25422	-0.862999	-0.126727	-1.16503	-0.436612	-0.0231257	-0.889287	0.294009	0
			381	-0.576509	-0.37851	0.61452	-0.567267	-0.360567	-0.864468	0.04755	0.764163	-0.593322	0.362155	0			1185	-0.419933	-0.144923	0.618936	-0.569349	-0.252674	-0.868297	0.231296	-0.960374	-0.501867	-0.00546589	0
			383	1.84926	-0.557203	-1.36645	1.40772	-0.52197	0.162129	-0.82849	-0.161977	0.28852	0.818832	0			1190	0.0237987	0.850123	-1.0709	-0.317877	0.905429	1.63723	-0.531892	0.145098	1.00688	0.0608543	0
			384	0.906348	3.08651	-1.19583	0.709026	-0.0821346	0.579898	2.83617	-0.960374	4.32595	-4.45244	0			1198	-0.399435	-0.718199	0.586428	-0.365901	-0.698818	-0.875762	-0.0410215	0.307668	-0.757316	0.967607	0
			389	1.72861	-0.0650593	-2.30316	2.79342	0.294836	1.329	-0.421862	0.204854	1.11429	0.582594	0			1216	0.700697	-0.302248	-0.438127	0.145061	-0.161096	-0.377944	-0.485517	1.06057	-0.469331	0.990088	0
			391	-0.695444	1.12958	0.412543	-0.613095	1.79489	0.57436	0.201274	0.999327	0.592194	-2.03968	0			1225	-0.698631	-0.814957	0.96379	-0.561351	-0.893503	-0.716834	-0.47621	-0.960374	-1.01276	0.620503	0
			393	-0.14828	0.580436	-0.23198	-0.300664	0.380324	0.8965	-0.234243	-0.49175	0.888672	-0.0329504	0			1230	-0.512254	0.629466	0.108522	-0.407624	0.676593	0.449904	0.70553	2.51651	0.458807	-1.89347	0
			397	-1.16584	1.3609	0.299875	-1.00531	1.4736	1.56237	-0.0935579	0.19445	0.791951	-0.325353	0			1241	0.776672	-1.1288	-0.17624	0.953834	-1.26482	-0.587143	-1.04814	-0.960374	-0.542383	0.913934	0
			400	-0.0479842	0.422694	-0.545538	-0.219256	0.572398	0.228859	-0.0967509	0.930565	0.569038	0.193367	0			13	-0.236336	-0.495412	0.488038	-0.337447	-0.268119	-1.57016	0.967578	0.579391	-0.757316	0.292455	1
			401	0.586938	-0.353477	-0.58804	0.083392	-0.229834	-0.217341	3.63665	2.11916	-0.376462	0.510447	0			17	-0.259627	-1.1288	0.686985	-0.11788	-1.26482	-1.12005	-0.668748	-0.960374	-1.31915	1.21294	1
			405	-0.148467	-0.144923	0.266177	-0.267685	-0.252674	-0.811549	1.09843	-0.960374	-0.459422	-0.101869	0			31	-0.0697642	-0.493402	0.25549	-0.164416	-0.437135	-1.84998	-0.469765	0.697834	-0.899196	0.992052	1
			407	-0.792543	0.48589	0.180218	-0.905475	1.06161	0.0554031	-0.215022	1.23929	0.0981427	0.490138	0			39	0.360886	-0.677664	0.0358318	0.592388	-0.692727	-0.65069	-0.47621	-0.960374	-0.899196	0.457155	1
			410	1.22952	-0.294931	-1.06886	0.851178	-0.0192699	0.102936	0.062881	0.117462	0.910655	0.210943	0			50	0.614607	-0.712847	-0.236534	0.170077	-0.727096	-1.73063	-0.295101	0.836018	-1.15465	1.04299	1
			412	0.040388	-0.452529	-0.229656	0.395331	-0.268989	-0.319679	-0.241713	1.28512	-0.148811	0.516688	0			61	1.15096	-0.559001	-0.82011	0.733924	-0.406899	0.823049	-0.624992	-0.960374	0.434655	0.489035	1
			415	-0.788468	1.76823	0.267065	-0.884439	1.86102	0.80452	0.669564	1.6059	1.04322	-2.15899	0			67	-1.10511	-0.458763	1.27327	-0.883909	-0.623989	-0.761487	-0.531131	-0.960374	-1.15516	0.601577	1
			417	-2.47689	0.368274	2.41101	-1.02776	0.581099	0.0925745	-0.216412	-0.161977	-0.669361	-1.19284	0			74	0.188279	-0.677664	0.524005	0.0215283	-0.692727	-1.04424	-0.922557	-0.960374	-0.534403	0.426524	1
			419	-0.5367	-0.0330156	0.467502	-0.638857	0.268733	-0.53306	-0.435633	0.307668	-0.43731	0.89828	0			79	-0.688286	-0.596055	0.914489	-0.676485	-0.824765	-0.714981	-0.582737	-0.960374	-0.972248	0.73775	1
			421	-3.18438	3.45877	1.56499	-0.557537	3.12592	1.68125	-0.127732	-0.203998	2.26595	-1.14907	0			84	-0.967031	-1.1288	1.61379	-0.797056	-1.26482	-0.939839	-1.04814	-0.960374	-1.48366	1.47479	1
			422	1.85482	3.63893	-2.0168	2.6155	-0.45345	0.571495	2.645	-0.960374	5.06381	-4.67112	0			91	-0.820478	-0.718199	1.01523	-0.676485	-0.698818	-1.01931	-0.739758	0.307668	-0.972248	1.02404	1
			425	0.975288	-1.1288	-0.760581	1.61805	-1.26482	-0.379684	-0.230984	-0.960374	-0.740741	1.30606	0			97	1.17804	-0.226532	0.071253	0.66902	-0.120637	-1.24482	-0.976945	-0.960374	-0.972762	0.515072	1
			427	-0.783578	3.34254	-1.12875	-0.980223	3.15225	2.85147	-0.650314	-0.960374	3.54927	-0.0173645	0			104	0.228629	-0.364084	-0.491126	-0.262291	-0.220698	-0.0865693	-0.18377	-0.520441	-0.149325	0.527974	1
			428	-1.64719	2.07024	0.767622	-1.05423	2.91123	0.600827	0.302286	1.03562	1.42214	-2.05392	0			113	0.942698	0.0228161	-1.19051	0.594514	0.431442	0.158455	-0.0556983	0.415586	0.545861	-1.55027	1
			431	0.594493	-0.322631	-0.454789	0.22032	0.133433	-0.377268	0.272152	-0.344468	-0.190083	-0.949608	0			121	0.284627	-1.1288	0.666375	-0.825509	-1.26482	-1.2336	-1.33786	-0.52924	-0.632863	1.18392	1
			432	-1.06566	0.0475291	1.08862	-0.784164	0.340517	0.160709	-0.273955	2.11916	0.0203178	0.366048	0			130	0.0612305	-0.775962	0.398843	-0.524636	-0.823025	-0.850629	-0.791436	-0.344468	-0.980743	0.709767	1
			434	0.490452	0.0459533	-0.3773	0.285069	0.112768	-0.0267145	-0.179636	-0.37776	-0.436796	0.0682029	0			138	0.870956	-0.323657	-0.749933	1.21934	-0.0793068	0.583032	-0.0803911	1.14272	-0.386482	0.182057	1
			442	-0.0347031	1.60151	-0.56386	-0.182269	1.27892	0.762464	0.710571	1.38275	1.40043	-2.34133	0			149	-2.40001	0.295418	2.22859	-1.0232	0.250026	-0.415786	-0.316124	1.09265	-0.273285	0.0320011	1
			443	0.234612	0.0316254	-0.0592631	0.271041	-0.0821346	0.269765	-0.256221	-0.960374	-0.294915	0.0466231	0			157	0.401615	0.366588	-0.398066	0.0048217	-0.0107864	0.192798	0.102607	-0.447119	0.257363	-2.01329	1
			451	-0.761767	-0.307601	0.737543	-0.599873	-0.132818	-1.1088	-0.433586	0.999327	-0.765296	0.990066	0			165	0.101259	-0.144923	0.126647	0.338818	-0.252674	-0.874078	-0.199321	-0.960374	-0.72478	0.259045	1
			454	-1.06262	0.694225	1.07872	-0.937164	0.317024	-0.457105	-0.69368	-0.344468	0.257474	0.128912	0			170	2.05105	-0.0633134	-1.70565	2.08342	-0.384712	-0.153908	-0.853423	-0.960374	1.60533	0.479907	1
			455	0.673317	-0.775962	-0.350875	-0.00560187	-0.823025	0.234037	0.369954	-0.286727	0.0698786	0.54345	0			176	-0.270353	0.0404022	-0.023838	-0.397121	0.453412	0.936702	0.380979	1.57571	0.444564	-1.64646	1
			456	-0.943921	1.11909	0.345968	-0.860984	1.2141	-0.328256	0.0980411	-0.0430671	0.509121	-1.72758	0			182	-0.883452	-0.580906	1.04593	-0.791278	-0.498042	-0.571371	-0.6607	0.0661361	-0.848771	0.944574	1
			465	0.610073	2.37874	-1.85803	-0.0754905	2.9208	1.3072	0.0840848	-0.470449	3.02156	-2.2806	0			191	-0.929796	-0.0537502	1.13044	-1.06077	0.280915	0.70583	0.0847779	-0.960374	-0.290436	-0.938148	1
			466	-0.894771	0.672656	0.496162	-1.08657	0.926094	-0.496957	0.366732	1.43482	-0.17388	0.164657	0			196	0.320099	-0.904	0.01521	0.288026	-1.00314	-2.12092	-0.481925	-0.0621777	-1.15465	1.1823	1
			468	2.15733	-1.1288	-2.7846	3.98414	-1.26482	2.75487	5.63799	-0.960374	2.95429	-0.527806	0			203	-1.1193	-0.458763	1.35299	-0.883909	-0.623989	-1.59387	-0.531131	-0.960374	-1.31915	0.58868	1
			471	0.512576	-0.59016	-0.340001	0.641872	-0.63182	-0.67755	0.357918	-0.161977	0.111501	0.157089	0			222	-2.77784	4.74469	1.16096	-0.531695	4.01038	1.32082	0.173885	-0.960374	1.92141	-0.588222	1
			474	1.41494	-0.782	-1.33431	1.23876	-0.676413	0.550544	0.461566	0.145098	-0.140831	0.427199	0			227	0.845593	-0.0574181	-0.759335	0.322951	-0.191767	-0.696421	-0.0186027	-0.361576	0.0757886	0.360353	1
			476	0.311504	-1.05081	-0.426398	0.272585	-1.12386	0.354645	-0.634258	0.117462	-0.444776	0.830506	0			235	0.81028	0.480776	-0.890985	1.16325	0.173457	1.05511	0.640338	0.656379	0.728808	-1.20515	1
			483	0.331119	-0.0575615	-0.633277	0.265651	0.260902	0.161729	-0.252563	0.307668	0.143222	0.199382	0			247	0.103623	-0.226532	0.410475	0.068293	-0.120637	-0.624243	-0.51584	-0.960374	-0.76581	0.27934	1
			485	-1.06066	-0.0381668	0.806901	-0.800819	0.181288	-0.269398	0.0460669	0.579391	0.0897906	-1.5589	0			252	-0.175602	0.250527	0.236944	-0.0722839	-0.0133967	-0.496946	-0.0721956	-0.960374	-0.509848	0.402945	1
			487	-0.000492512	0.168918	0.173795	0.0804436	0.118641	-0.533319	-0.0628284	-0.960374	-0.509848	-0.0925356	0			257	0.211311	-0.789496	0.454215	-0.582361	-0.692727	0.799615	-0.30164	-0.960374	-0.92481	-0.80896	1
			490	0.387413	0.0493896	-0.594541	-0.0648756	0.17759	0.0754355	-0.191833	-0.115013	0.18767	-0.0820798	0			271	0.449902	-0.814957	-0.159093	0.682578	-0.893503	0.0795181	-0.407004	-0.960374	-0.72478	0.597054	1
			491	-1.28278	-0.413872	1.70234	-1.02528	-0.360567	-1.19966	-0.945926	0.346093	-0.881307	0.380801	0			279	-0.0313565	-0.677664	0.566593	-0.0525624	-0.692727	-1.23838	-0.637068	-0.960374	-1.10422	0.424284	1
			495	-0.432576	1.66459	-0.291894	-0.940005	2.40222	0.409405	0.617119	0.0194765	1.54641	-2.10309	0			289	-0.169818	-0.0506898	0.400748	-0.0891141	0.0997163	-0.0381128	-0.357889	2.51651	-0.205902	0.65995	1
			499	-0.436102	0.0866026	0.759199	-0.326211	0.300492	0.118104	-0.693483	2.11916	-0.735717	0.730535	0			295	0.0824688	0.664372	-0.338578	-0.114098	0.415345	0.518578	0.528742	-0.361576	1.12697	-2.0988	1
			502	0.0278514	-0.854212	0.185092	-0.194573	-0.863267	-0.668583	0.656721	-0.960374	-0.725294	0.825373	0			312	-0.476059	0.783269	0.401916	-0.557677	0.426656	-0.368838	0.0269375	-0.960374	-0.254399	0.342706	1
			503	-1.73992	1.5526	1.0272	-1.04921	1.62739	1.00912	-0.049409	0.509402	1.02257	-0.0421662	0			318	1.82581	-0.226532	-1.69699	1.5967	-0.120637	0.397067	-0.132185	-0.960374	0.857954	0.056165	1
			505	-1.2927	0.316161	1.11246	-0.910791	0.469726	0.418639	-0.488401	0.955778	0.0345613	0.225961	0			328	-0.998741	-0.458763	1.16664	-0.903945	-0.623989	-1.63511	-0.395259	-0.960374	-1.0637	0.698772	1
			509	-0.282262	0.383765	-0.272197	-0.384165	0.80167	0.445733	-0.0549614	1.28512	-0.0658506	0.303228	0			335	0.414655	-0.59016	-0.647781	0.728294	-0.63182	-0.919715	1.37256	-0.13127	-0.72478	0.511385	1
			514	0.906348	3.08651	-1.19583	0.709026	-0.0821346	0.579898	2.83617	-0.960374	4.32595	-4.45244	0			344	0.30429	-0.346624	0.00848514	-0.23202	-0.362959	-1.4472	-0.179121	0.764163	-0.990652	0.799246	1
			521	-1.05764	0.0501711	0.388423	-0.941672	0.34987	-0.369277	-0.334998	1.33289	0.0256048	0.422042	0			352	3.09714	0.460032	-2.95321	2.73649	0.266993	1.03448	-0.288143	-0.680416	1.51066	0.0397068	1
			522	2.30274	-0.346248	-2.59486	2.37805	-0.173713	0.115257	0.421917	0.636419	0.404531	0.443511	0			360	0.457996	-0.344719	-0.437224	0.265722	-0.292481	0.391522	-0.159793	0.697834	-0.222216	0.0529662	1
			523	1.06394	-0.503342	-1.27256	1.86478	-0.327938	0.25077	0.468255	1.50325	-0.0149115	0.799055	0			368	-0.829531	0.426815	0.322718	-0.684556	0.257857	2.20993	-0.460656	-0.511276	0.650194	0.0235853	1
			525	0.274566	0.926457	-0.410136	-0.242831	0.820377	0.0561707	-0.238009	-0.470449	0.46345	-0.309819	0			379	0.866931	1.20649	-1.51043	-0.166993	1.06205	1.06511	0.521108	0.259817	1.57938	-2.21762	1
			526	0.7044	1.14773	-0.491934	0.340156	1.36506	-0.428205	0.0330909	1.14272	0.788592	-2.28578	0			387	0.19351	0.70166	-0.473778	-0.150105	0.558694	0.406759	-0.473685	-0.960374	0.00104982	0.199683	1
			527	-0.913846	1.12532	0.258249	-1.04657	1.56627	0.223859	-0.264258	0.897963	0.53984	-1.66918	0			396	1.10919	0.737132	-0.728351	1.0258	0.799059	-0.685526	0.0513952	0.697834	0.614176	-2.20983	1
			529	-0.239663	-0.419768	0.334335	-0.447328	-0.553511	0.0542956	-0.849196	-0.470449	-0.214236	0.152166	0			403	-0.352865	1.12061	0.363937	-0.630363	2.10769	-0.600248	3.0552e-05	1.14272	0.614176	-1.87276	1
			531	0.830184	-0.660121	-0.676695	0.144295	-0.382102	0.479436	1.2557	-0.217039	-0.0749891	-1.09003	0			413	1.91373	0.112974	-1.97073	0.79331	-0.00621837	0.138831	-0.561428	-0.335542	0.354105	0.692175	1
			533	1.16183	1.65647	-1.54703	0.672586	-0.0116565	0.00362013	0.94701	-0.459055	2.54844	-2.94456	0			424	1.81571	-0.138727	-1.84242	2.02893	-0.372313	0.0360718	-0.386966	0.0661361	0.354105	0.411118	1
			539	-0.16735	-0.956016	0.656046	-0.881182	-0.863267	0.919367	0.0799251	-0.960374	-0.92481	-0.584306	0			435	1.21903	0.180733	-1.53325	1.17975	-0.169362	0.147735	1.31923	0.145098	0.248518	-0.101812	1
			542	-0.0200098	-0.365363	-0.0849278	-0.288693	-0.220263	-0.441382	-0.197493	0.47674	-0.517828	0.285958	0			440	0.712417	-0.919293	-0.650457	0.153728	-0.984428	0.242476	4.96574	0.999327	-0.367967	0.579059	1
			543	-0.549069	-0.421708	0.48281	-0.751229	-0.121072	-0.364608	0.192939	-0.960374	-0.568767	0.324054	0			446	-0.0281051	-0.144923	0.175066	-0.180571	-0.252674	-0.00779761	-0.351992	-0.960374	-0.345854	0.0979782	1
			547	-2.92699	-0.991505	2.85789	0.267565	-0.992259	0.911416	-1.0922	0.0194765	-0.468356	0.870318	0			450	0.0695569	-0.423126	-0.323748	-0.0470531	-0.381232	-0.498099	0.136909	0.307668	-0.0474471	0.403449	1
			548	-2.03095	1.03446	1.6435	-1.05085	1.63	0.956618	-0.0332612	2.40786	-0.222377	0.175016	0			459	0.761005	-0.501649	-0.534073	0.184673	-0.291176	1.12509	-0.496158	-0.960374	0.174402	-0.479755	1
			549	-1.87525	-0.309155	1.87951	-1.02078	-0.0597295	1.0519	0.245077	0.117462	-0.577906	-1.09097	0			464	0.062374	0.387819	0.40858	-0.444536	0.187379	-0.281153	-0.753433	-0.960374	-0.429329	0.262407	1
			552	1.34862	-1.1288	-1.44188	2.34586	-1.26482	3.37427	1.92653	-0.960374	0.880611	-0.21605	0			473	0.176799	-0.596055	0.184863	0.0625328	-0.824765	-0.27499	-0.890596	-0.960374	-0.062643	0.565905	1
			554	-0.0839469	0.0166707	0.374694	-0.230019	0.705524	-0.647764	0.0523183	-0.286727	-0.289922	-1.50168	0			479	1.6931	-0.95251	-0.581641	1.7338	-0.993564	-0.579451	-1.20341	-0.601095	-0.808255	0.787702	1
			555	1.46792	-0.180105	-1.22652	0.868163	-0.287043	-0.34587	-0.337919	0.204854	-0.221863	0.631767	0			486	0.778431	-0.29919	-0.936831	0.389664	-0.138039	-0.180294	0.918289	1.26963	-0.221863	0.831974	1
			558	-0.784102	-0.237324	0.687988	-0.70322	-0.0714759	0.124666	0.421789	0.636419	-0.24449	0.359668	0			494	-0.272761	-0.595081	0.258854	-0.576058	-0.503263	1.08915	2.10814	1.57571	-0.369031	-0.327547	1
			559	1.35258	-0.180105	-1.1628	1.22056	-0.156746	-0.144778	-0.637143	0.359425	0.9627	0.548693	0			501	0.221555	-0.796003	0.498036	0.17029	-0.786263	-0.579445	-0.683903	-0.30714	-1.10422	0.640283	1
			560	0.690501	-1.1288	-0.65244	0.911741	-1.26482	1.32006	2.65843	-0.960374	-0.193551	0.306663	0			510	-0.245211	0.215445	0.0364065	-0.0865406	-0.244191	0.130634	0.697788	1.26963	0.308302	-1.97544	1
			564	0.225345	-0.462121	-0.304665	0.165464	-0.45171	0.705784	0.465394	-0.217039	0.631258	0.239162	0			515	0.789559	0.469429	-0.791599	0.542284	0.0553412	-0.0353546	-0.336714	-0.960374	0.141052	0.283952	1
			571	2.02171	-1.1288	-1.7626	3.1974	-1.26482	-1.04498	1.66343	-0.960374	-0.173366	0.880009	0			520	1.53232	0.156192	-1.84342	0.670438	0.489521	0.195135	-0.519123	0.457831	1.08929	0.362174	1
			574	0.115171	0.0316254	-0.105843	-0.330762	0.0251052	-0.176759	0.045509	-0.326353	0.175466	0.0345242	0			536	0.354267	-0.144923	-0.106206	0.135963	-0.252674	-0.290182	-0.30261	-0.960374	-0.469331	0.0792184	1
			576	-0.367972	1.06326	-0.144111	-0.740105	0.792534	0.265967	0.541632	-0.960374	1.54845	-2.06267	0			541	1.394	-0.239653	-0.327803	1.09425	-0.0518986	0.0477357	-0.927919	-0.960374	-0.45085	-1.6373	1
			577	0.806643	2.5186	-0.834179	0.988998	-0.45345	0.23153	2.57906	-0.960374	3.259	-4.21482	0			553	-0.483608	-0.540372	0.648354	-0.461778	-0.406899	-0.360269	-0.180564	-0.960374	-0.775719	0.36024	1
			578	1.50976	3.26549	-1.62576	2.04559	-0.45345	0.456773	2.62714	-0.960374	4.46221	-4.54406	0			565	-0.116797	-0.551165	0.132309	-0.252909	-0.561342	-0.959817	0.435953	0.836018	-0.286935	0.436967	1
			583	-0.97837	-0.135214	0.876971	-0.905295	-0.000562718	-0.101535	-0.373354	1.82114	0.0608341	0.446461	0			569	0.165519	-0.718199	0.405211	0.0625328	-0.698818	-1.16857	-0.972026	-0.217039	-1.0637	1.03407	1
			584	-0.242487	-0.551165	0.412683	-0.406396	-0.561342	-0.547957	-0.757692	0.346093	-0.286935	0.493719	0			579	0.921155	0.362771	-0.500696	0.645428	0.990264	0.0412452	-0.488412	0.579391	0.746148	0.228038	1
			586	-0.202531	0.395967	-0.314284	-0.311439	0.620254	1.14816	0.293445	-0.960374	0.503775	-1.68202	0			589	-0.728897	1.19998	0.742014	-0.53018	1.59216	0.162873	-0.533281	0.874239	-0.305338	0.118668	1
			592	2.70536	-1.1288	-2.52671	3.91336	-1.26482	-0.334166	2.7433	-0.960374	0.175466	0.764326	0			597	-0.722953	-0.00347265	0.502116	-1.0583	0.552821	0.849576	0.947666	0.526296	-0.0424535	-1.28683	1
			594	0.397553	0.321919	-0.5356	0.381408	0.00117748	-0.831929	0.657985	0.47674	0.00104982	-0.105666	0			605	-0.215187	0.115512	-0.0919662	-0.60745	0.251766	-0.482197	0.435454	0.941688	0.430915	0.144159	1
			595	0.186797	2.33963	-0.392236	-0.116773	-0.0821346	0.408764	2.83635	-0.960374	3.12274	-4.09147	0			617	0.588323	-0.551165	-0.297956	0.0698293	-0.561342	0.111343	-0.883504	-0.0805082	-0.386371	0.578141	1
			598	-0.841735	0.100219	0.17597	-0.751677	0.613945	0.647981	-0.209091	0.836018	0.200021	0.236629	0			629	-0.360968	0.471687	0.227779	-0.519839	0.662236	0.460934	-0.44443	0.259817	-0.323742	0.237433	1
			599	3.3739	-0.0633134	-2.91468	4.05907	-0.384712	0.258392	-0.973944	-0.960374	3.16909	0.446192	0			640	0.108314	-0.148541	-0.367242	-0.236915	0.0203197	0.797713	-0.314311	-0.176493	0.371995	0.0367989	1
			603	-0.654394	-0.00327382	0.698332	-0.618724	0.205433	-0.90403	-0.451787	0.579391	-0.346368	0.433067	0			653	0.73649	-0.033182	-0.725912	0.636863	0.334208	0.262153	-0.470939	0.636419	-0.199751	0.854203	1
			607	-0.352383	0.885922	0.374135	-0.234861	0.814286	0.40509	-0.553995	-0.0621777	0.00104982	0.116224	0			662	-0.547968	0.920561	0.247069	-0.717645	0.712484	0.283506	0.192939	-0.960374	-0.00693081	0.322873	1
			608	1.11551	-0.187276	-1.21427	1.16707	-0.150873	0.622375	0.164033	-0.960374	0.159505	-0.180589	0			668	0.501761	-0.814957	-0.143663	0.389075	-0.893503	0.191704	-0.932056	-0.960374	0.0921523	0.690786	1
			610	0.0824875	-0.144923	0.117564	-0.049139	-0.252674	-1.20829	-0.0721956	-0.960374	-0.684264	0.0123357	0			673	1.00592	-0.207843	-1.76955	0.7081	-0.0394997	0.511653	-0.413809	0.0785036	1.17726	0.152569	1
			612	-0.564201	1.59274	0.434357	-0.750939	-0.0821346	0.278043	2.83663	-0.960374	1.91953	-3.59484	0			680	0.69024	-1.1288	-0.117547	0.584739	-1.26482	-0.536688	-1.04814	-0.960374	-1.48315	1.2326	1
			613	0.447019	2.14516	-0.43249	0.509533	-0.45345	0.120683	2.54561	-0.960374	2.65739	-3.99639	0			684	1.16512	-0.226532	-0.934309	1.0854	-0.120637	0.00555609	-0.208375	-0.960374	0.681721	-0.0773506	1
			614	1.16059	2.89204	-1.23172	1.50237	-0.45345	0.343483	2.60559	-0.960374	3.8606	-4.37945	0			693	-0.377557	0.564367	0.0355349	-0.397748	0.357919	0.994885	-0.741115	-0.960374	0.801668	0.310265	1
			618	2.70536	-1.1288	-2.52671	3.91336	-1.26482	-0.311889	2.7433	-0.960374	0.0944336	0.71411	0			700	0.500733	-0.865005	-0.295807	0.497449	-0.932657	-0.64198	-0.726232	0.0661361	-0.824216	1.14697	1
			619	-1.25762	-1.01181	1.69878	-0.831561	-1.05338	-1.45004	-1.21975	0.616946	-0.534403	1.22356	0			705	1.02141	-1.05081	-0.887211	0.607301	-1.0871	-0.484295	-0.164325	0.117462	-0.221863	1.00129	1
			620	0.186797	2.33963	-0.392236	-0.116773	-0.0821346	0.408764	2.83635	-0.960374	3.12274	-4.09147	0			712	1.6528	-0.462381	-1.7179	1.21685	-0.350996	0.879488	-0.490985	-0.276034	0.390064	-0.0180587	1
			622	-1.07467	0.280125	0.925899	-0.882955	0.305495	0.28015	-0.151748	0.526296	-0.171438	-0.127755	0			716	0.208171	-0.442335	0.336267	-0.557597	-0.26094	-0.512353	-0.7521	-0.960374	-0.907691	0.724062	1
			623	-0.185842	1.43294	-0.446416	-0.116346	0.710744	0.559222	1.24392	0.117462	0.339459	-0.21826	0			733	-0.488781	0.920561	0.20379	-0.717645	0.712484	-0.140604	0.192939	-0.960374	0.0335854	0.32151	1
			626	-0.919562	0.941016	0.524338	-0.216019	1.55474	-0.145755	-0.00193232	4.06952	-0.221863	0.579108	0			737	-1.35445	2.38149	0.872929	-1.08439	1.74682	-0.563472	0.284683	-0.960374	0.349882	0.0694275	1
			630	-0.674657	0.896128	0.396967	-0.667888	0.930009	-0.163381	0.308482	-0.960374	0.308302	-2.03011	0			741	-0.240073	-0.233966	0.433631	-0.322221	-0.362307	-0.618424	-0.677543	-0.421456	-0.469331	0.271768	1
			633	-0.00572021	-0.144923	0.0332804	-0.551793	0.0907978	1.15877	-0.554026	-0.447119	-0.129105	0.0907919	0			745	-0.196902	-0.596055	0.478688	-0.336666	-0.824765	-0.5175	-0.778647	-0.960374	-0.542383	0.78986	1
			635	-1.2566	0.0475291	1.10186	-0.630253	0.340517	0.107646	-0.123937	2.4887	-0.550364	0.36157	0			753	1.11911	2.76409	-3.1438	-0.79204	2.98627	4.26064	-0.724148	-0.810674	3.34994	-0.814033	1
			637	1.04055	2.8033	-1.26795	0.773814	-0.260505	0.574663	2.00072	-0.37776	4.17997	-4.40719	0			759	0.255353	0.0798744	0.0888831	-0.0172262	0.00900838	-0.111728	-0.649049	-0.545822	-0.560787	0.215832	1
			638	0.841166	0.0645821	-1.04865	0.195776	0.134955	0.149801	0.0713077	0.0194765	0.364014	0.0633129	0			767	-0.734081	-0.282215	0.989808	-0.684022	-0.45345	-0.821188	-0.554067	-0.960374	-0.7168	0.663481	1
			639	-1.23003	0.831518	1.01724	-0.869241	0.517799	0.60486	-0.735899	-0.520441	0.504943	0.125007	0			777	1.18738	-0.502465	-0.757856	0.0287674	-0.350996	0.116227	-0.65073	-0.217039	0.267514	0.338643	1
			643	-2.05836	0.627765	1.83604	-1.08805	0.775784	-0.209173	-0.477518	0.237221	-0.561301	0.0550857	0			785	0.701816	-0.40721	-0.515971	0.49696	-0.0107864	0.325457	1.06458	-0.217039	-0.0749891	-1.55902	1
			644	1.44331	0.339336	-1.28535	0.939776	0.133433	-0.338301	0.650463	-0.344468	0.604267	-1.98921	0			794	1.34255	-1.1288	-1.13747	2.09867	-1.26482	-1.5533	-0.289353	-0.960374	-0.659709	1.28734	1
			645	-1.86222	1.11309	1.24696	-0.98109	1.33047	0.974611	0.264831	2.51651	-0.0983862	0.139272	0			807	-0.274802	0.415241	0.205196	-0.217222	-0.167622	-0.041232	0.865914	-0.960374	0.225341	-2.05537	1
			648	-0.194816	0.17825	0.497424	-0.163582	-1.26482	0.131702	2.41752	-0.960374	0.344045	-2.73926	0			814	0.791339	-0.501117	-0.755395	0.87045	-0.522188	0.665584	-0.867361	-0.960374	0.678191	0.690388	1
			649	0.622439	-1.1288	-0.531598	0.881567	-1.07318	0.290229	-0.525038	0.237221	-0.517828	1.24132	0			820	-2.44465	0.718296	2.23337	-0.883752	0.988306	-0.372343	-0.065596	2.63241	-0.849285	0.0445335	1
			651	-1.00553	0.168918	1.13226	-0.743697	0.118641	-0.630338	0.0450404	-0.960374	-0.674355	-0.0879818	0			832	0.621415	-1.05081	-0.459108	0.182475	-1.0871	-0.666076	-0.461288	0.117462	-0.477312	1.15028	1
			654	0.251773	-0.566457	-0.398088	0.255944	-0.554164	-0.218725	0.0621363	0.346093	-0.26238	0.536556	0			847	0.918714	-0.523067	-1.09381	1.08953	-0.608328	0.238944	0.207214	0.836018	-0.0149115	0.387574	1
			655	-2.34483	-0.638669	2.29793	-1.04094	-0.622249	-0.911312	-0.577855	0.307668	-1.31915	0.942568	0			859	0.234618	-0.302248	-0.00583275	-0.23202	-0.161096	-1.49197	-0.297312	1.52694	-0.899196	0.963418	1
			657	-1.5597	0.168918	1.50328	-1.05554	0.203693	-0.320251	-0.014119	-0.960374	-0.327451	0.106909	0			873	0.690188	-1.05081	-0.578737	0.182475	-1.0871	-0.0719497	-0.461288	0.117462	-0.26238	0.83343	1
			661	0.079253	1.20182	-0.47786	-0.607063	1.26304	0.650385	0.100124	-0.13127	0.577019	-0.103099	0			878	-0.211437	-0.596055	0.558657	-0.336666	-0.824765	-1.16301	-0.778647	-0.960374	-0.757316	0.751091	1
			663	-0.935707	0.342606	0.603221	-0.499167	1.30415	1.16211	0.764464	4.84335	-0.26238	0.259709	0			884	0.325532	-0.144923	0.284222	0.32616	-0.252674	-1.166	-0.658908	-0.960374	-0.889287	0.299506	1
			666	0.966835	0.987754	-1.13057	-0.282722	0.298969	0.229458	0.288326	-0.0430671	0.544483	-1.28579	0			892	1.50675	-0.0499837	-1.33743	1.20922	0.0499031	0.885092	-0.831679	-0.960374	1.11982	0.0161745	1
			675	2.79498	0.861476	-3.34173	2.51531	0.550211	1.50479	-0.110086	0.0785036	1.98156	-1.96093	0			896	0.739742	-1.1288	0.0532114	-0.562597	-1.26482	-0.707481	-1.14778	-0.561175	-0.614329	1.17768	1
			677	0.549953	-0.880297	-0.374098	0.181007	-0.91395	0.267375	-0.68078	0.0422637	-0.651728	1.12293	0			905	0.614285	0.339612	-0.972816	0.899775	0.95546	0.504924	-0.286809	1.86673	0.51617	0.616508	1
			678	-1.3869	-0.566457	1.2888	-1.02196	-0.542635	0.264898	-0.482637	0.764163	-0.765296	0.682125	0			916	-0.596957	-0.540372	0.731237	-0.461778	-0.406899	-0.192043	-0.180564	-0.960374	-0.816236	0.313029	1
			686	-0.94574	0.843082	0.0963398	-0.790318	1.39878	1.42853	-0.215637	0.866466	1.3152	0.110878	0			926	0.895858	-0.0749113	-0.773533	0.352636	0.275041	0.374352	0.129496	-0.4346	0.0231625	0.166057	1
			687	-0.735777	1.28383	0.106092	-0.678514	0.797972	1.42337	-0.539015	-0.960374	1.6326	-0.56213	0			941	1.63805	0.034009	-1.56795	1.09907	0.0255403	1.20173	0.273062	-0.50172	0.773065	-0.123038	1
			690	-1.3044	0.262318	1.09388	-1.0171	0.372493	-0.458603	-0.151748	0.526296	-0.333423	-0.184997	0			950	0.538927	-0.527462	-0.471287	-0.0437885	-0.483686	-0.236073	-0.51942	0.509402	0.42391	0.445625	1
			694	-0.905859	1.09711	0.355274	-0.776608	0.797972	1.02829	-0.681374	-0.960374	1.13382	-0.316343	0			957	-0.61459	0.276663	0.324973	-0.769234	0.601764	0.10084	-0.427591	0.764163	-0.240781	0.35325	1
			695	-0.979911	1.09711	0.417826	-0.810589	0.797972	1.13269	-0.611583	-0.960374	1.13382	-0.326482	0			970	1.24987	-0.854212	-1.1656	1.0879	-0.863267	0.31175	0.397582	-0.960374	0.0424305	-0.266508	1
			698	1.62231	-1.1288	-1.44197	2.59291	-1.26482	-1.35411	-0.194504	-0.960374	-0.452757	1.29417	0			980	0.33904	-0.386551	-0.326095	0.272427	-0.544375	0.104985	0.831916	0.0661361	-0.294915	0.541904	1
			707	1.06849	1.04863	-1.08041	0.673257	0.744025	-0.349593	1.10985	-0.264996	0.910655	-2.02363	0			984	1.58163	-0.596055	-1.06287	1.78896	-0.824765	-0.265771	-1.06651	-0.960374	1.54164	0.524165	1
			710	-0.994343	0.168918	1.12408	-0.743697	0.118641	-0.683448	0.0450404	-0.960374	-0.542383	-0.0745114	0			990	0.259624	0.0999441	0.133924	-0.458694	0.0161867	0.710599	-0.698978	-0.537693	-0.346368	0.557321	1
			711	0.661286	0.361591	-0.575051	0.271569	0.369012	-0.0171823	0.277079	0.887344	0.0415661	0.0327115	0			996	-1.13119	-1.1288	1.62954	-0.91204	-1.26482	-0.175474	0.67868	-0.960374	-1.48366	1.2403	1
			720	-0.467975	-0.174626	0.493357	-0.464043	0.0431598	-0.566005	-0.623547	1.30875	-0.120499	0.314671	0			1002	-0.428634	1.01931	0.200243	-0.734691	1.65524	0.414092	-0.0857857	0.415586	0.637353	-0.0444701	1
			722	-0.821531	0.670716	0.911941	-0.857094	1.16863	-1.11667	0.821443	1.57571	-0.327451	0.0534964	0			1014	-0.754305	-0.282475	0.364494	-0.527449	-0.352736	2.39382	-0.512578	-0.459055	0.153533	0.249357	1
			723	-1.25482	0.694225	1.27093	-1.0036	0.317024	-0.319871	-0.636737	-0.286727	-0.286935	0.168868	0			1023	-0.193649	-0.718199	0.505994	-0.143636	-0.698818	-0.531358	-0.934059	-0.13127	-0.277576	0.68181	1
			725	-1.2251	0.0313653	0.969515	-0.848781	0.0903627	2.05788	-0.480574	-0.459055	-0.106367	0.218577	0			1034	-0.811757	-0.452868	1.00284	-0.785761	-0.431045	-1.06163	-0.367244	-0.0621777	-0.89971	0.430077	1
			726	-0.816678	-0.0966736	1.08637	-0.763067	-0.161531	-0.0271927	-0.817919	-0.470449	-0.552806	0.276562	0			1039	0.91247	-0.237324	-1.00443	0.009771	-0.190027	0.658746	-0.147628	0.0194765	-0.00693081	0.410899	1
			727	-1.57939	0.127466	1.5737	-1.00908	0.668762	0.762657	-0.276184	2.95903	-0.940227	0.835951	0			1044	-1.46602	-0.814957	1.90369	-1.03834	-0.893503	-1.86123	-1.00065	-0.960374	-1.13676	0.69575	1
			729	1.38476	-0.252877	-1.60852	0.483072	-0.033844	0.318877	0.00272692	0.17419	0.26265	0.487294	0			1050	1.87217	1.6926	-2.07531	1.30632	1.27065	0.0877129	1.94709	1.65256	1.99468	-2.41257	1
			730	-1.28545	-0.365363	1.43269	-1.00716	-0.206559	-0.494716	-0.117722	1.09265	-0.808255	0.480641	0			1055	2.12871	-0.0633134	-2.77156	2.21077	-0.384712	0.0849884	2.77027	-0.960374	0.791468	0.379079	1
			731	-0.633294	-0.105927	0.591449	-0.507348	-0.182196	1.26209	-0.645467	-0.470449	-0.313319	0.233801	0			1059	0.375365	-0.0633134	-0.212676	0.21653	-0.384712	-0.290772	-0.52786	-0.960374	-0.0682619	0.467248	1
			746	-0.99374	-0.27658	0.651278	-0.793399	-0.159791	0.673973	-0.488136	0.0911729	-0.363744	0.547614	0			1072	4.25533	-1.1288	-2.18698	7.86864	-1.26482	-0.462835	-1.25276	-0.960374	-1.07078	1.32567	1
			747	-0.35111	1.13613	0.23082	-0.4078	0.804932	-0.473455	0.337372	0.430381	1.10241	-2.22359	0			1081	1.58998	0.426815	-1.75109	0.381548	0.257857	0.108052	-0.236091	-0.606985	0.354105	0.505487	1
			749	0.783819	-0.0564985	-0.782455	0.828395	-0.382972	-0.260847	-0.268166	-0.520441	0.229873	0.101895	0			1088	-0.343907	-0.0506898	0.607247	-0.287941	0.0997163	-0.0882536	-0.463314	2.40786	-0.644262	0.730446	1
			754	0.524035	-0.282215	-0.526264	0.411894	-0.45345	0.703499	-0.693548	-0.960374	0.116707	0.534352	0			1098	1.14445	-0.0633134	-0.713728	0.85728	-0.384712	0.476961	-0.693548	-0.960374	-0.43731	0.72508	1
			757	-0.569728	0.670716	0.678293	-0.72441	1.16863	-0.675098	0.503066	1.1953	-0.112518	0.0652211	0			1105	-0.414745	-0.226532	0.756397	-0.295795	-0.120637	-0.657099	-0.358794	-0.960374	-0.76581	0.266445	1
			760	0.413026	-1.1288	-0.782505	-1.01127	-0.26094	3.14529	-0.355919	-0.960374	2.04097	-0.720117	0			1110	0.874586	-0.815217	-1.02098	0.501029	-0.792789	-0.533251	0.343876	-0.447119	-0.355763	0.85445	1
			763	-1.03251	1.00488	0.647398	-1.06707	1.40269	-0.543686	0.651051	0.38692	0.440274	-1.75835	0			1120	-0.343306	-0.190288	0.255048	-0.991407	0.176068	0.750813	0.616856	1.12576	-0.297902	-0.800672	1
			766	-1.62065	2.98702	0.904809	-0.949225	3.50616	0.473438	0.00746412	2.35604	0.799932	-0.180683	0			1127	-0.572997	-0.718199	0.798255	-0.514961	-0.698818	-0.11746	-0.823955	0.117462	-0.797832	1.06703	1
			768	-2.22752	0.0268844	2.02891	-1.08005	0.21457	-1.065	-0.131305	2.84375	-1.10422	0.381736	0			1134	-0.0614567	-0.596055	0.405254	-0.143636	-0.824765	-0.729437	-0.841338	-0.960374	-0.318092	0.571064	1
			770	0.850037	-0.206545	-0.576557	0.971598	-0.80236	0.179736	-0.246585	-0.421456	-0.0810466	-1.88434	0			1145	-0.998741	-0.458763	1.16664	-0.903945	-0.623989	-1.68534	-0.395259	-0.960374	-1.10422	0.654062	1
			772	1.92394	-0.95251	-1.50806	2.1431	-0.993564	-0.0385345	-0.665783	-0.582186	-0.313319	0.942129	0			1153	0.0478397	-1.1288	0.225796	0.280738	-1.26482	-2.21938	-0.457973	-0.960374	-1.19516	1.2898	1
			774	0.180748	-0.041283	-0.101303	0.297758	0.0440299	0.375603	-0.229267	0.741471	0.225341	0.130295	0			1158	-0.371904	-0.718199	0.494627	-0.258468	-0.698818	-1.60565	-0.44456	0.117462	-0.939713	1.01555	1
			778	-0.996299	-0.709788	0.942059	-0.966796	-0.704039	-1.2975	-0.220372	1.1953	-1.19516	1.21289	0			1165	-0.305281	-0.535484	1.11251	-0.594005	-0.554164	-0.907781	-1.03161	0.526296	-1.31967	1.01362	1
			779	-0.204544	0.0645821	0.237966	-0.492827	0.0277155	-0.247313	2.00024	0.237221	-0.286935	-0.0838447	0			1174	-0.927953	-0.267066	1.12745	-0.709658	-0.126727	-0.993297	-0.436612	-0.0231257	-0.848771	0.379183	1
			782	0.166144	0.168918	-0.204595	0.137145	0.203693	0.417497	-0.18712	-0.960374	-0.0474471	0.206597	0			1178	-0.279153	-0.144923	0.690066	-0.413829	-0.252674	-1.05863	-0.521301	-0.960374	-0.848771	0.364045	1
			787	-1.83191	-0.365363	1.81033	-1.08843	-0.206559	-0.414332	0.355619	1.91385	-0.7168	0.464513	0			1188	0.0378798	0.355696	0.0532899	-0.322494	0.15301	0.261672	-0.416879	0.145098	-0.469331	0.548129	1
			788	-0.0838457	-1.1288	0.483804	-0.497143	-1.26482	0.553248	7.69588	-0.960374	-0.486889	-0.354263	0			1197	0.0906492	-1.1288	0.317101	0.179781	-1.26482	0.107782	-0.939745	-0.960374	-0.757316	1.30966	1
			789	-1.11973	0.0765161	0.967409	-0.982347	0.181288	-0.34905	-0.444351	0.346093	-0.0130327	-0.125866	0			1204	-0.440804	-0.596055	0.697516	-0.514961	-0.824765	0.134931	-0.696159	-0.960374	-0.757316	0.768704	1
			793	-0.141927	-0.210263	-0.0181554	-0.515239	-0.273122	1.66428	-0.582666	-0.0621777	-0.157306	0.26906	0			1208	-0.0352988	-0.197706	0.289327	-0.0986466	0.269603	0.249091	-0.428005	0.117462	-0.0344729	-1.47439	1
			796	-1.1113	1.10871	0.796769	-0.909355	1.24499	0.649151	0.568921	0.38692	0.0514751	-0.193707	0			1213	0.895643	0.531007	-1.18689	-0.224112	0.581099	1.10549	-0.288104	-0.588706	1.14629	0.289603	1
			797	0.89217	1.80121	-0.886434	1.10407	2.59799	-0.165295	-0.189762	2.40786	0.378047	0.622274	0			1219	0.260457	-1.05081	0.123357	-0.718866	-1.12386	-0.197263	-0.0724462	0.237221	-0.725808	1.07068	1
			799	0.156261	0.0877055	-0.255211	-0.0127669	0.385979	0.213249	-0.372484	0.697834	-0.181347	0.832649	0			1228	-1.08289	3.72156	0.078088	-0.882157	3.02847	0.693587	0.186007	-0.960374	1.43675	-0.112286	1
			800	-0.571299	-0.599674	0.0242928	-0.0818751	-0.551771	2.65186	-0.45975	-0.0430671	0.269543	0.6107	0			1236	-0.162416	-0.495412	0.475167	-0.29764	-0.268119	-0.548101	-0.306943	0.117462	-0.542383	0.337182	1
			803	-0.927453	0.465927	0.818252	-0.787094	0.448409	0.494673	-0.151748	0.526296	-0.333423	-0.193752	0			1244	0.0407699	-0.596055	0.399845	-0.143636	-0.824765	-0.229732	-0.841338	-0.960374	-0.848771	0.746324	1
			805	-1.07394	0.262318	1.18351	-1.02118	0.372493	-1.03918	-0.618331	0.307668	-0.086357	-0.0504367	0
			806	-0.603917	-0.374877	0.416441	-0.672156	-0.290089	0.740104	-0.597412	0.616946	0.207649	0.310942	0
			809	0.818638	-0.0633134	-0.842704	0.826785	-0.384712	0.970088	-0.691392	-0.960374	0.381558	0.0353714	0
			812	-0.672914	-0.0727104	0.678625	-0.87444	-0.17306	-0.390785	1.81604	0.579391	-0.542383	-0.113255	0
			815	-0.57436	-0.187536	0.655633	-0.654964	-0.0501584	0.282045	-0.563931	-0.4346	-0.121013	0.155084	0
			817	0.414353	-0.616505	-0.671124	-0.0389515	-0.5	-0.432778	-0.229898	1.09265	-0.148811	0.950037	0
			822	-1.76546	-0.213621	1.44947	-1.02482	0.0799215	-0.357427	-0.122936	2.63241	-0.161015	0.349845	0
			823	0.254202	0.603363	-0.151231	0.216988	0.428397	-0.12619	-0.340596	-0.447119	-0.047961	-0.107679	0
			824	-0.092885	0.111409	0.0447208	0.0211033	0.427962	-0.154517	-0.0543578	1.91385	-0.345854	0.668165	0
			828	0.149912	-0.175519	-0.301757	0.605037	-0.216565	0.864254	0.0400804	0.887344	-0.313319	0.681435	0
			830	-0.888719	-0.679204	0.926272	-0.889481	-0.577874	-0.857294	0.324146	1.73421	-0.939713	0.93608	0
			831	0.823572	-1.01181	-0.947213	0.151956	-1.01662	-0.479856	-0.28161	0.359425	-0.148811	1.00726	0
			835	-1.99179	-0.213621	1.66597	-1.07023	0.316154	0.754721	0.0453689	3.14566	-0.375948	0.3438	0
			836	0.715428	0.27341	-1.20727	0.533953	0.0475103	0.598108	0.445787	-0.0805082	0.80186	0.144859	0
			837	0.27538	-0.95251	0.0450728	0.182475	-0.993564	-0.567719	-0.711947	-0.421456	-0.72478	0.561489	0
			841	-2.10742	0.797474	1.33918	-1.05384	1.30981	-0.104254	1.19401	1.62643	0.610047	-1.73759	0
			842	-0.938961	-0.237324	0.916815	-0.763867	-0.0714759	-0.413152	-0.146026	0.636419	0.326706	0.233093	0
			843	-1.48787	2.80122	0.753408	-0.884098	3.31495	0.665243	-0.0639106	2.17515	1.01486	-0.179085	0
			846	-0.714068	0.458647	0.338447	-0.844707	0.866275	-0.69644	0.225287	1.65256	0.0289424	-1.53368	0
			848	-0.267242	-0.596055	0.485689	-0.365901	-0.824765	-0.92067	0.15967	-0.960374	-0.757316	0.699345	0
			850	-1.65921	-0.0727104	1.65387	-1.08792	-0.17306	-0.691285	0.119113	0.579391	-1.01276	0.0225431	0
			853	0.76416	-0.215798	-0.862054	0.806418	-0.786263	0.194859	0.0751569	-0.393092	0.472809	-1.94978	0
			854	-1.24015	0.724122	0.569969	-1.06013	0.901731	-0.0930096	0.612416	0.999327	0.313106	-1.6155	0
			855	-0.0403316	4.02834	-2.87234	-1.0773	4.79978	3.87626	-0.797419	0.249441	6.43616	-0.353604	0
			858	0.177495	1.63382	-0.481489	-0.626397	1.80903	-0.487752	0.357836	1.09265	0.499324	-1.58329	0
			860	0.607327	-0.177046	-0.771197	0.476275	-0.263986	0.65866	0.445801	0.307668	-0.154913	-0.265941	0
			862	-0.584032	-0.403439	0.806754	-0.468216	-0.63182	-1.16957	-0.0655097	0.117462	-0.808255	0.368293	0
			864	-1.74465	-0.417379	1.73089	-1.0214	-0.230269	0.579835	0.381056	-0.0621777	-0.669361	-0.718906	0
			865	-2.58058	2.92603	1.18852	-0.859895	2.68587	1.51119	-0.17652	-0.190491	2.09154	-0.992419	0
			866	-0.885169	-0.622995	0.831356	-0.627786	-0.360567	0.575429	0.191373	0.526296	-0.824972	-1.04709	0
			868	0.787904	-0.991505	-1.09844	1.27907	-0.992259	3.93868	1.95163	-0.960374	1.08756	-0.221209	0
			871	-0.666081	-0.740025	0.720595	-0.454084	-0.679023	-0.669415	-0.416835	0.697834	-0.550364	0.558284	0
			876	-3.18438	3.45877	1.56499	-0.557537	3.12592	1.68125	-0.127732	-0.203998	2.26595	-1.14907	0
			882	-0.420323	0.695771	-0.0846603	-0.54608	1.0429	1.14498	0.117778	0.38692	0.768774	-1.40032	0
			885	2.23444	0.596426	-3.49267	1.36106	0.558694	0.77762	2.43593	-0.960374	1.67379	-1.86656	0
			886	0.837243	-1.1288	-1.03837	1.3452	-1.26482	-0.488333	6.13363	-0.960374	-0.7168	1.15627	0
			890	1.79982	0.923853	-1.70733	1.94398	0.799059	-0.228969	0.722597	0.656379	1.20855	-2.27715	0
			899	-0.282702	0.956224	0.0147235	-0.494739	0.806673	-0.267207	0.505329	1.06057	1.25484	-2.25747	0
			900	-0.391408	-0.0966736	0.758928	-0.615769	-0.161531	0.143677	-0.83464	-0.537693	-0.388299	0.277777	0
			903	-0.879017	-0.991505	1.41865	-0.788538	-1.06404	-1.56252	-1.23554	-0.960374	-0.632863	0.580783	0
			904	-0.823587	-1.1288	0.66802	-0.551308	-1.09602	1.01866	-0.469765	0.697834	-0.947693	1.15312	0
			906	-1.26489	-0.0121388	1.43374	-1.05254	0.0975411	-0.169493	-0.361044	1.34927	-0.848771	0.577147	0
			909	-2.1087	-0.638929	2.00366	-1.0829	-0.521535	-1.10452	-0.858277	0.0911729	-1.15465	1.02386	0
			911	-0.591004	-0.0966736	0.929752	-0.689107	-0.161531	-0.345576	-0.734691	-0.447119	-0.593322	0.244927	0
			913	1.14442	-0.913514	-0.725488	0.698406	-0.923086	-0.274703	-0.841257	-0.253596	-0.39628	0.800057	0
			915	-0.674496	0.27285	0.184786	-0.86599	0.542597	0.48743	-0.362549	-0.561175	0.272045	0.365583	0
			917	-2.17265	0.678933	1.95166	-1.02701	0.335731	0.116834	-0.376779	-0.0231257	-0.76581	0.391142	0
			919	-0.296005	1.45766	0.0784935	-0.622978	1.2117	0.873362	-0.451288	0.0997921	-0.0173537	0.125366	0
			922	-1.66766	0.54571	1.5948	-0.911742	0.970034	-0.270285	-0.308166	4.91873	-0.643748	0.641373	0
			923	2.07039	-0.152712	-1.80488	1.70167	0.0255403	0.76496	-0.128773	-0.545822	0.197579	-0.0309874	0
			925	-1.01768	0.111841	1.12778	-1.0378	0.611553	0.338687	-0.391782	1.0449	-0.297357	0.279487	0
			928	-1.29297	0.570263	1.04517	-0.965937	0.550863	0.341742	-0.657037	-0.459055	0.256499	0.136299	0
			929	-0.817922	-0.736966	0.429793	-0.879831	-0.409075	0.540867	0.144904	1.06057	-0.181347	0.600713	0
			930	-1.69683	0.721171	1.44134	-1.08852	1.36136	0.196483	0.657635	2.78862	-0.213883	0.163539	0
			932	2.23996	0.857074	-2.30893	3.01832	-0.203731	0.815664	-0.0231332	0.501098	1.77892	-1.93795	0
			933	-2.26162	-0.596055	2.58282	-1.01042	-0.824765	-2.55186	-1.07171	-0.960374	-1.48315	1.11523	0
			934	2.07039	-0.152712	-1.80488	1.70167	0.0255403	0.76496	-0.128773	-0.545822	0.197579	-0.0309874	0
			938	0.769543	-0.991505	-0.483991	0.935199	-1.06404	0.22967	-1.10187	-0.960374	0.409716	0.668952	0
			940	0.602923	-0.282215	-0.620186	0.660524	-0.45345	0.827712	-0.769489	-0.960374	0.381558	0.045094	0
			942	-2.18689	0.623702	1.76035	-1.08651	0.730974	0.464583	0.180381	-0.13127	0.626726	-1.45584	0
			947	1.02141	-1.05081	-0.887211	0.607301	-1.0871	-0.484295	-0.164325	0.117462	-0.221863	1.00129	0
			948	-1.74893	-0.0780775	1.7594	-1.07505	0.341822	-0.0557781	-0.164818	-0.190491	-0.413913	-1.44672	0
			949	0.647684	0.081094	-0.923013	-0.0460722	-0.576569	-0.212164	-0.219017	0.19445	0.454406	-1.89602	0
			952	-1.94482	0.498884	1.56132	-1.02491	0.758817	0.787669	-0.104175	2.01296	-0.568767	0.406778	0
			956	2.17689	-0.0633134	-2.23688	1.66913	-0.384712	-0.211691	2.28364	-0.960374	0.564815	0.410517	0
			958	-0.971705	-0.237324	0.902853	-0.904914	-0.190027	0.000148536	-0.404551	0.47674	-0.349786	0.056154	0
			962	-0.927241	-0.413872	0.810142	-0.788056	-0.360567	-0.923728	-0.265505	0.271438	-0.684264	0.521143	0
			963	-0.652537	-1.1288	0.9462	-0.481866	-1.26482	-2.83963	-0.668748	-0.960374	-1.48315	1.67802	0
			964	-0.46373	-1.1288	0.846499	-0.497143	-1.26482	-0.386318	2.83721	-0.960374	-0.486889	-0.057237	0
			968	0.444474	1.27372	-0.856463	-0.134952	1.30829	-0.025348	1.06857	0.17419	1.67	-2.04685	0
			969	0.787904	-0.991505	-1.09844	1.27907	-0.992259	3.93868	1.95163	-0.960374	1.08756	-0.221209	0
			971	-0.767636	1.52473	0.128484	-0.830614	1.68656	0.425111	-0.238285	0.430381	0.766851	-0.0428566	0
			974	1.94417	-1.1288	-1.73093	3.11873	-1.26482	0.283792	1.02818	-0.960374	-0.254399	0.251436	0
			976	0.406729	2.97205	-2.43909	-0.476711	3.20641	5.1846	-0.538666	-0.259343	4.01528	-0.554816	0
			977	0.104292	0.673749	-0.462059	-0.379507	1.03703	0.00280524	-0.179052	1.62643	-0.108295	0.435156	0
			985	-0.977164	-0.452868	0.94572	-0.867594	-0.0875727	0.488063	-0.486053	0.346093	-0.560787	0.55371	0
			986	-0.457235	-0.158662	0.13847	-0.938135	0.4123	0.952485	-0.143129	0.543582	0.0656071	-0.195093	0
			991	0.973923	-0.296896	-1.01386	1.98344	-0.143259	0.377716	0.820255	2.11916	-0.477312	0.76683	0
			998	0.75993	0.30621	-0.691198	0.633297	0.319417	1.18039	-0.767179	-0.960374	0.66796	0.216416	0
			1000	-1.10508	0.0866026	0.972243	-0.774042	0.288963	0.157514	0.0633121	2.88904	-0.560787	0.732618	0
			1003	-2.2764	-1.1288	2.15278	-0.918004	-0.45345	2.37191	1.05261	-0.960374	-0.486889	-1.20626	0
			1006	-0.211964	0.336088	0.0764485	-0.418729	-0.0656027	-0.196801	0.414622	0.579391	0.225341	-1.92113	0
			1007	-0.417648	-0.755355	0.864767	-0.695019	-1.26482	0.13057	5.42641	-0.960374	-0.486889	-1.44857	0
			1008	1.66396	0.684828	-1.58616	1.12086	0.635916	0.486379	-0.713775	-0.0744817	1.97627	0.376982	0
			1012	1.28479	-1.1288	-1.43015	2.04814	-1.26482	3.49979	2.93833	-0.960374	0.848076	-0.281396	0
			1013	0.338979	-0.371259	-0.275308	0.784501	-0.563082	1.44512	-0.664992	-0.481336	-0.284715	0.373066	0
			1016	0.327892	-0.178575	-0.200702	0.609199	-0.156746	0.555419	-0.380494	0.656379	0.225341	0.255358	0
			1018	-0.108687	-0.718199	0.364573	-0.317596	-0.698818	-0.842849	-0.668058	-0.241817	-0.970431	0.743626	0
			1019	-2.30688	1.65511	1.76336	-1.08878	2.55992	0.65636	0.411888	3.35097	0.297991	-1.65157	0
			1020	0.770252	-1.1288	-1.00334	3.16859	-1.26482	0.546487	0.636818	-0.960374	-0.947693	1.41346	0
			1025	-1.17848	1.2344	0.552259	-0.644654	0.998747	3.27753	-0.371983	-0.960374	1.46921	-0.163354	0
			1027	-1.24708	0.262318	1.36849	-1.06375	0.372493	-1.07157	-0.552259	0.430381	-0.433261	-0.0394154	0
			1028	0.147736	-0.386551	-0.142582	0.0550771	-0.544375	-0.383462	1.18741	0.237221	-0.550364	0.537683	0
			1031	1.43839	1.10431	-1.39048	1.03755	1.07684	0.34369	0.548466	-0.49175	1.28958	-2.04146	0
			1035	-1.42419	-0.165582	1.58721	-1.02146	0.280915	-0.0943317	-0.0504745	-0.960374	-0.413913	-1.46235	0
			1041	-0.625958	0.071397	0.332027	-0.445068	0.136696	-0.140719	-0.00806396	0.836018	0.07603	0.248992	0
			1048	-0.287804	-0.145183	0.239683	-0.643813	-0.15196	0.550764	-0.76138	-0.575432	-0.364258	0.463518	0
			1060	-0.781324	0.245481	0.549829	-0.581782	0.609813	-0.987452	0.039377	0.526296	-0.0682619	-1.40808	0
			1061	-0.516939	0.489768	0.34835	-0.581782	0.357919	-1.08423	0.283189	-0.960374	-0.0682619	-1.47061	0
			1065	-0.464997	1.76714	0.398693	-0.585139	1.4388	1.18238	-0.695243	-0.960374	0.850357	-0.0638823	0
			1066	-0.464997	1.76714	0.398693	-0.585139	1.4388	1.18238	-0.695243	-0.960374	0.850357	-0.0638823	0
			1067	-0.838335	-0.381913	1.25089	-0.695019	-1.26482	-0.244686	1.48518	-0.960374	-0.632863	-2.05044	0
			1069	-0.399133	0.675431	0.150177	-0.574603	0.728799	0.240631	-0.229253	0.656379	0.554553	-0.0685177	0
			1070	-0.68883	0.675431	0.562884	-0.72754	0.728799	0.761818	-0.418951	0.656379	0.430562	-0.0557263	0
			1073	-0.206727	-0.603307	0.254284	-0.23328	-0.622249	-0.0762382	-0.158059	-0.241817	-0.0846257	0.310839	0
			1075	0.661077	0.783269	-0.677722	0.481225	0.426656	-0.0223612	-0.151736	-0.960374	-0.00693081	-0.00608773	0
			1077	-1.29845	-0.0571204	1.1197	-0.974364	0.155838	0.278839	1.01331	0.38692	-0.340074	-1.51823	0
			1080	0.289553	-0.566457	-0.39535	0.00433681	-0.446707	0.792354	-0.504213	0.509402	0.248518	0.592399	0
			1085	-0.943378	1.3124	0.484295	-0.716791	1.90691	0.489019	0.163447	0.914122	0.472023	-1.77605	0
			1086	0.326858	-1.1288	-0.0418421	0.783316	-1.26482	-0.55048	-0.496296	-0.960374	-0.947693	1.24626	0
			1089	-0.822713	1.09711	0.244509	-0.724958	0.797972	1.26774	-0.647872	-0.960374	1.34875	-0.332491	0
			1093	0.144049	-0.0669318	-0.225582	-0.294956	-0.111718	0.142945	-0.334389	-0.13127	-0.181347	0.0331666	0
			1094	0.197881	-0.307601	-0.0747413	0.21653	-0.132818	-0.195379	-0.68353	0.271438	-0.213883	1.03042	0
			1095	0.501812	-0.95251	-0.170396	0.374492	-0.993564	0.145869	-0.753049	-0.459055	-0.509848	0.558883	0
			1099	1.01381	-0.180105	-0.799245	0.430631	-0.287043	-1.13464	-0.151502	0.430381	-0.692245	0.629769	0
			1103	0.267232	0.152086	-0.553207	0.25929	0.0770937	0.38529	0.659246	0.430381	-0.00693081	-0.290455	0
			1104	0.0286443	-0.033715	-0.293831	0.25929	-0.114111	0.432029	0.136909	0.307668	-0.0474471	-0.246718	0
			1111	0.769186	0.114011	-0.868272	0.310143	-0.0658202	-0.150829	-0.119547	0.0422637	0.281054	0.031196	0
			1112	0.815314	-0.337875	-0.776091	2.3767	-0.596799	0.435642	0.0262815	0.787467	-0.0497283	-0.699708	0
			1115	-0.942536	0.521134	0.513861	-0.756045	0.357266	-0.0583383	-0.19278	0.579391	0.200021	-0.165162	0
			1117	-0.827575	0.612347	0.544708	0.364062	0.511274	0.352593	0.193209	2.84375	-0.0255758	-0.401618	0
			1119	0.3637	1.55246	-0.958029	-0.184915	2.3163	1.48872	-0.362141	0.439412	1.56023	-0.0883872	0
			1122	0.672885	0.473575	-0.993239	1.3245	0.940451	1.04136	0.0103622	2.11916	0.141101	0.21749	0
			1126	0.611334	-1.1288	-0.31838	0.883392	-1.26482	-1.31963	2.30088	-0.960374	-0.797832	0.787376	0
			1130	0.596202	0.0999441	-0.464712	-0.194793	0.0161867	0.596987	-0.685858	-0.537693	0.207488	0.522968	0
			1131	1.03245	-0.596055	-0.934723	0.736517	-0.824765	-0.284002	4.15169	-0.960374	-0.193551	0.348038	0
			1135	2.4545	-0.0633134	-1.96918	2.62019	-0.384712	-0.395715	-0.896057	-0.960374	1.42242	0.478691	0
			1136	0.774116	-0.55706	-0.407171	0.626467	-0.754287	-0.411443	-1.02091	-0.511276	1.10241	0.524759	0
			1140	0.159327	0.670716	0.129055	-0.216914	1.16863	-0.128467	-0.0568396	0.526296	0.0109588	0.0880452	0
			1142	-0.503545	0.0111757	0.108957	-0.377656	0.186291	-0.248593	-0.268952	0.874239	0.240537	0.420604	0
			1143	1.13905	0.773109	-1.54848	0.158583	0.974167	1.36408	0.281975	1.03562	0.741012	0.205916	0
			1144	-1.13093	-0.580906	1.26738	-0.903945	-0.498042	-1.54533	-0.553971	0.237221	-1.10422	0.935455	0
			1149	-0.0439014	1.63021	-0.460522	-0.192521	1.06836	0.553268	0.538258	0.0422637	1.71016	-2.18318	0
			1150	0.114307	-0.596055	0.0922712	0.0791084	-0.824765	-1.05459	-0.361483	-0.960374	-0.980229	0.73676	0
			1151	-0.246047	-0.59016	0.23923	-1.08171	-0.63182	0.302342	-0.795712	-0.146913	-0.0564555	0.603011	0
			1160	-0.649929	-0.677664	0.783233	-0.476522	-0.607675	-0.703122	0.0510883	-0.960374	-0.939713	0.382414	0
			1162	-1.00857	0.320913	0.860272	-0.440151	0.708351	-0.559194	-0.106403	3.72587	-0.684264	0.628712	0
			1163	1.14464	0.525826	-1.49841	0.472671	0.734672	0.933051	0.399442	0.307668	1.06884	-1.60846	0
			1168	-0.407748	-0.307601	0.43329	-0.334074	-0.132818	-0.733623	-0.469765	0.697834	-0.684264	0.992356	0
			1171	-0.00602508	1.05915	-0.536643	-0.674838	1.44728	0.0630075	-0.425235	0.307668	1.09318	-1.68891	0
			1172	0.165445	-0.144923	-0.0284603	-0.0748194	-0.252674	-0.713636	1.72362	-0.960374	-0.286935	-0.0613333	0
			1180	0.176987	-0.178575	-0.0819529	0.609199	-0.156746	0.918645	-0.265482	0.741471	-0.0902446	0.0206238	0
			1181	-0.424071	0.823054	-0.238173	-0.245245	0.684859	0.23168	-0.082755	1.62643	0.545861	-2.02945	0
			1183	0.796014	-0.247548	-0.92789	0.699807	0.0440299	-0.174937	0.069967	-0.407638	0.184955	-1.27971	0
			1186	-0.246372	-0.144923	0.407109	-0.427102	-0.252674	-0.99092	1.09843	-0.960374	-0.501867	-0.0384688	0
			1187	0.128468	-0.144923	0.171471	-0.0657157	-0.252674	-1.05057	0.522553	-0.960374	-0.501867	0.083878	0
			1189	-0.959507	-0.259442	0.922076	-1.08115	0.0964534	1.69486	0.948472	0.636419	-0.381377	-0.770969	0
			1191	-1.27793	-0.712847	1.23284	-0.956584	-0.360567	0.976624	0.0210613	3.65892	-1.19516	1.06703	0
			1194	-1.45703	0.482758	1.35555	-1.0698	0.489956	-0.419288	-0.354783	-0.960374	-0.171438	0.161991	0
			1196	-0.820478	-0.718199	1.01523	-0.676485	-0.698818	-0.823353	-0.739758	0.307668	-1.01276	1.04098	0
			1201	0.0612913	-0.775962	0.0509563	0.248007	-0.823025	-0.356994	-0.555521	-0.344468	-0.550364	0.428635	0
			1202	-1.21034	-0.307601	1.26018	-0.903945	-0.132818	-0.424563	-0.695977	1.30875	-0.757316	0.957914	0
			1211	0.773421	-0.596055	-0.330338	0.748144	-0.824765	-0.228321	-0.990442	-0.960374	0.63203	0.547615	0
			1217	0.692675	-0.363824	-0.86072	0.973055	-0.321412	1.44857	-0.698228	-0.960374	0.838098	0.439172	0
			1220	-1.04255	1.60941	0.55677	-0.779119	2.24821	0.0716678	0.163522	1.85137	0.407354	-1.91387	0
			1223	0.415495	-0.0515228	-0.652951	0.504115	0.00117748	0.906667	-0.874158	-0.276034	1.43753	0.458297	0
			1226	-0.38017	-0.475656	0.577417	-1.04063	-0.250934	1.33567	-0.039297	-0.326353	-0.35459	-1.14499	0
			1227	0.711163	-0.315575	-0.915419	0.873157	0.158666	1.11874	-0.523403	-0.286727	0.396036	0.371197	0
			1229	-0.6617	-0.495412	0.92447	-0.663853	-0.268119	-1.96858	0.119113	0.579391	-1.01276	0.317954	0
			1231	-0.873804	-0.55706	1.03888	-0.791278	-0.754287	-1.42974	-0.6607	0.0661361	-0.757316	0.727641	0
			1233	-0.189151	-0.0848135	0.274594	-0.299995	0.297882	-0.838652	1.54856	1.73421	-0.327451	0.222593	0
			1240	-0.113765	-0.605452	-0.107162	-0.363648	-0.398634	0.483573	-0.445906	0.616946	-0.0554277	0.579131	0
			1242	-0.590548	0.137974	0.799287	-0.664508	0.728581	-1.37788	0.710008	1.73421	-0.542383	0.173349	0
			1243	-0.367301	-0.282215	1.07759	-0.582361	-0.45345	-1.61021	-1.00065	-0.960374	-1.01328	0.194818	0
			2	0.235749	-0.0633134	-0.0640537	0.0219628	-0.384712	-0.359041	-0.450538	-0.960374	-0.469331	0.69377	1
			5	-0.000374118	-0.0633134	0.153559	-0.161877	-0.384712	-0.831888	-0.356034	-0.960374	-0.72478	0.701353	1
			11	-1.64496	-0.144923	1.7515	-1.08957	-0.167622	-0.0902789	-0.228611	-0.960374	-0.889287	0.335202	1
			14	-1.03556	-0.0848135	1.15324	-0.872579	0.297882	-1.59482	0.0637433	1.73421	-0.757316	0.294192	1
			15	-0.903365	0.0373301	1.0525	-0.872579	0.171935	-1.67906	0.284798	0.47674	-0.757316	0.262926	1
			16	-0.171777	-1.1288	0.614343	-0.0553104	-1.26482	-1.38826	-0.879523	-0.960374	-1.31915	1.19387	1
			25	0.675238	-0.275487	-0.640245	0.688117	-0.161966	-0.443004	1.61124	3.14566	-0.428815	0.565243	1
			28	-0.0191113	-0.452868	0.280399	-0.413829	-0.431045	-1.15904	-0.0794917	-0.13127	-0.461351	0.287869	1
			29	-0.225787	-0.0884062	0.724932	-0.124917	0.178678	0.13268	-0.308479	0.999327	-0.991166	0.616556	1
			32	0.568306	-1.05081	-0.303725	0.634822	-1.12386	-0.323706	-0.773902	0.0911729	-0.213883	1.10821	1
			33	0.106748	-0.282215	-0.14063	0.193409	-0.45345	0.773785	-0.693548	-0.960374	0.116707	0.450924	1
			36	0.856248	-0.814957	-0.0790527	0.576024	-0.893503	-0.964947	-0.841296	-0.960374	-1.15516	1.05962	1
			40	-0.293017	-0.904	0.691728	-0.336666	-1.00314	-1.04299	-0.886188	-0.0231257	-1.0637	1.10935	1
			46	-1.83805	0.224601	2.05323	-1.04746	0.451454	-1.17481	-0.31861	-0.960374	-0.278954	0.127909	1
			48	1.99516	-0.226532	-0.621044	1.59294	-0.120637	-0.231204	-1.03414	-0.960374	-0.644776	0.473725	1
			52	0.419908	0.920561	0.124144	0.214277	0.627432	-1.23396	-0.59525	-0.960374	-0.418906	0.191574	1
			54	-0.536919	-0.904	0.910556	-0.514961	-1.00314	-2.01679	-0.823955	0.117462	-1.31915	1.10966	1
			59	-0.0840738	-0.718199	0.564552	-0.143636	-0.698818	-1.11276	-0.934059	-0.13127	-1.0637	1.03199	1
			62	0.196043	-0.854212	0.173003	0.0219628	-0.863267	-1.5336	-0.450538	-0.960374	-1.15465	0.864497	1
			63	0.275797	-0.677664	0.509977	0.367998	-0.692727	-0.964162	-0.987733	-0.960374	-1.0637	0.551697	1
			66	0.341224	2.45025	-2.06667	-0.90717	2.61496	3.82172	-0.728403	-0.78792	2.78811	-0.854461	1
			70	0.727977	-0.00685386	-0.573848	0.23746	-0.0107864	0.249282	0.346297	-0.37776	-0.0498893	0.0915338	1
			72	2.71062	1.32405	-3.24957	2.36349	1.55431	0.981296	0.0317029	0.879833	1.71569	0.330758	1
			73	0.942479	0.0706208	-0.898474	0.863943	0.0251052	-0.319989	-0.435209	-0.481336	0.556834	0.341872	1
			75	0.219057	-0.226532	0.728605	-0.119119	-0.120637	-1.26071	-0.888546	-0.960374	-0.972762	0.460109	1
			76	-1.04957	-0.243363	1.00054	-0.957452	0.192817	0.0565169	-0.0467199	1.85137	-0.775719	0.249719	1
			78	0.530843	0.0253438	-0.836925	0.470957	0.130822	-0.0184366	-0.429917	0.552377	0.313589	0.381989	1
			80	0.19387	-1.1288	0.107803	0.35595	-1.26482	-1.73387	1.311	-0.960374	-0.972248	0.955986	1
			82	-1.77849	-0.226532	2.1015	-1.06708	-0.120637	-1.42482	-0.393514	-0.960374	-0.972762	0.328584	1
			83	-1.3476	-0.854212	1.53386	-0.969834	-0.7197	1.34773	-0.716094	-0.960374	-0.907177	0.899056	1
			85	-0.867687	-1.1288	1.28517	-0.695019	-1.26482	0.619832	1.35239	-0.960374	-1.48366	0.865975	1
			86	-1.58243	-0.741137	1.99873	-1.08855	-0.747326	-0.779698	-0.299207	2.11916	-1.48366	1.21685	1
			88	-0.487528	-0.1076	0.0998438	-0.746736	0.393593	0.666216	-0.0720629	0.697834	-0.363744	0.173844	1
			93	-1.19776	-0.0633134	1.27883	-0.994272	-0.384712	-1.951	-0.201156	-0.960374	-0.972248	0.601952	1
			94	-0.400735	-1.1288	0.742041	-0.276552	-1.26482	-0.966661	-0.795213	-0.960374	-1.2277	1.29632	1
			95	-0.227173	-1.1288	0.530214	-0.100875	-1.26482	-2.23445	0.321128	-0.960374	-1.2277	0.99929	1
			99	-1.54214	-0.991505	1.89001	-1.06972	-1.06404	-2.01933	-1.00065	-0.960374	-1.48315	1.11523	1
			101	0.224637	-0.484991	-0.0816165	-0.0423793	-0.442356	-0.710638	-0.346837	1.1953	-0.735203	0.877587	1
			102	1.76883	0.0706208	-0.523377	1.81299	-0.0116565	-1.16835	-1.00843	-0.62355	-0.666374	0.0133185	1
			108	0.00703472	-0.677664	0.884181	0.203577	-0.692727	-1.75228	-1.03173	-0.960374	-1.22821	0.50633	1
			109	-1.9347	0.0480534	2.26515	-1.08566	0.280915	-1.07036	-0.537481	-0.960374	-0.789851	0.373311	1
			112	0.0507301	-0.775962	0.66451	-0.471178	-0.823025	-0.816718	-0.850837	-0.326353	-1.10473	0.691998	1
			116	1.14745	0.0497624	-1.05351	0.900282	0.365314	0.295285	-0.407334	0.154628	0.792927	0.256028	1
			117	1.00142	-0.677664	0.200943	1.26347	-0.692727	-1.7249	-1.11056	-0.960374	-1.22821	0.512295	1
			119	-1.51535	-0.226532	1.92006	-1.0155	-0.120637	-1.4664	-0.511891	-0.960374	-0.972762	0.385125	1
			122	1.30208	-1.0898	-0.0150373	1.79702	-1.19434	-1.80009	-1.31357	-0.49175	-1.13676	1.26179	1
			124	1.18232	-0.240383	-1.04592	1.61921	-0.190027	-0.139996	-0.662489	-0.161977	0.859716	0.236301	1
			127	0.0569101	0.0704774	-0.10574	-0.68862	0.22066	0.834523	-0.181819	-0.00229792	-0.19177	0.362995	1
			132	0.10888	-0.462121	0.25293	0.062987	-0.45171	1.30739	-0.803031	-0.481336	-0.270874	0.53743	1
			133	1.39676	-1.0898	-1.21849	1.66568	-1.19434	-0.278276	-0.120438	-0.407638	-0.221863	1.00176	1
			134	0.895858	-0.0749113	-0.773533	0.352636	0.275041	0.374352	0.129496	-0.4346	0.0231625	0.166057	1
			139	-0.476059	0.783269	0.401916	-0.557677	0.426656	-0.548288	0.0269375	-0.960374	-0.335431	0.165158	1
			142	1.67218	-0.596055	-1.72401	2.07932	-0.824765	0.295079	1.49214	-0.960374	0.533342	-0.552657	1
			146	1.38484	-0.616715	-1.10173	1.65209	-0.291176	-1.18158	0.0475645	-0.960374	-0.431288	-1.634	1
			150	-0.779469	0.0480534	0.332447	-0.668374	0.365967	1.55497	0.163359	-0.960374	0.100585	0.222487	1
			155	0.733271	0.107334	-0.87196	0.341484	0.161928	0.418154	0.56877	0.656379	0.157063	0.225942	1
			156	-1.0965	1.98605	0.529672	-1.08313	1.59259	-0.0534614	0.343655	-0.960374	0.422934	0.0528788	1
			158	1.42218	0.992873	-1.57018	1.13528	0.450802	0.0815649	-0.173673	-0.276034	1.05624	-2.02189	1
			160	0.930832	0.67495	-0.982741	0.414676	-0.143477	0.393389	0.265623	0.0422637	0.9531	-2.24305	1
			161	-0.507986	-0.0905182	0.315662	-0.443805	0.0438124	-0.165331	0.0473271	-0.13127	-0.302896	0.475586	1
			166	0.689947	-0.382185	-0.612903	0.333564	-0.244191	0.180303	-0.463787	0.415586	0.563751	0.437597	1
			167	-0.915341	-0.144923	1.09099	-0.622572	-0.252674	-1.12524	-0.151936	-0.960374	-0.889287	0.257037	1
			168	1.01886	-0.29944	-1.19521	1.16606	0.00552798	0.957767	0.270725	0.509402	0.248407	-0.0242949	1
			171	-0.752079	-0.105927	1.00481	-0.912424	-0.182196	-0.289805	-0.885684	-0.407638	-0.725294	0.431293	1
			172	0.217767	-0.814957	0.0536866	0.448271	-0.893503	-0.722252	-0.295245	-0.960374	-0.980229	0.594761	1
			173	-0.5367	-0.0330156	0.467502	-0.638857	0.268733	-0.53306	-0.435633	0.307668	-0.43731	0.89828	1
			177	0.707526	-1.1288	-0.464854	1.15299	-1.26482	-1.79303	-0.352585	-0.960374	-0.907177	1.29043	1
			180	-0.79576	-0.144923	1.02671	-0.709658	-0.252674	-1.06222	-0.308636	-0.960374	-0.848771	0.347917	1
			181	0.0220862	-0.0892391	0.291784	0.0378509	0.0801391	-0.768429	-0.269584	-0.960374	-0.72478	0.336039	1
			183	-1.19776	-0.0633134	1.27883	-0.994272	-0.384712	-2.04291	-0.201156	-0.960374	-1.01276	0.509457	1
			188	-1.16387	-0.144923	1.27271	-0.988068	-0.252674	-0.779668	-0.151936	-0.960374	-0.940227	0.574907	1
			190	0.251202	-0.484991	-0.0401044	0.0148445	-0.442356	-0.854011	-0.485517	1.06057	-0.611212	0.924003	1
			192	-1.00765	0.920561	1.08632	-0.96359	0.627432	-1.20032	-0.203127	-0.960374	-0.418906	0.186137	1
			193	-0.178261	-0.23624	0.291228	-0.64923	0.334208	0.0417181	0.383449	-0.217039	-0.0749891	-1.02237	1
			195	0.0624285	-0.371259	0.15475	-0.164416	-0.563082	-1.90545	-0.358472	-0.0981055	-0.899196	0.710659	1
			198	0.170776	-0.682262	0.148943	0.232764	-0.741453	-1.61397	-0.469765	0.697834	-1.15465	1.1446	1
			200	0.24162	0.454731	-0.375076	0.407417	0.836691	-0.0104705	-0.553895	1.1953	0.0556981	0.485056	1
			201	-0.286518	-0.139287	0.280697	-0.534679	0.0409846	-0.397044	-0.536358	-0.13127	-0.141345	0.457224	1
			204	0.652702	0.98214	-0.702529	0.00755914	1.15319	0.471021	-0.633683	-0.684006	0.586816	0.127877	1
			215	0.732421	-0.178575	-0.643961	1.31269	-0.156746	0.888699	-0.463787	0.415586	0.165204	0.131197	1
			219	0.427022	-0.95251	-0.390311	0.489434	-0.993564	1.30059	-0.833612	-0.481336	-0.244199	0.809024	1
			223	-2.40258	2.89214	1.45186	-1.08844	3.91424	1.81389	-0.160277	-0.960374	2.70966	-0.843148	1
			224	-0.336087	1.98377	-0.283668	-0.367034	2.05701	0.546894	0.352501	1.52694	1.77947	-2.07677	1
			225	1.36485	-0.616715	-2.2139	1.61317	-0.291176	2.65655	3.96046	-0.960374	-0.158464	-1.4584	1
			228	1.57169	-0.0522092	-1.78014	2.29239	0.244153	1.02101	-0.0991626	0.579391	1.42974	0.232209	1
			230	1.34778	-0.677925	-1.3225	0.933516	-0.592013	0.441854	-0.52521	-0.601095	-0.290692	0.537445	1
			231	0.413807	-0.814957	0.0399592	0.181554	-0.893503	-0.389262	-0.990442	-0.960374	0.0977712	0.656237	1
			241	0.78922	0.365059	-0.861927	0.0764854	0.0964534	0.476524	0.740143	0.145098	0.554392	-1.20924	1
			244	0.273987	-0.956016	0.216588	-0.625146	-0.863267	0.791454	-0.150241	-0.960374	-0.0740132	-0.616024	1
			246	-0.864522	-0.226532	1.04897	-0.609316	-0.120637	-0.619925	-0.123224	-0.960374	-0.76581	0.242916	1
			249	1.06261	-0.226532	-0.230613	0.918442	-0.120637	-0.709732	-0.712149	-0.960374	-0.76581	0.293051	1
			250	-0.176667	-0.0931103	0.0643216	-0.84711	-0.00230292	0.830927	0.652812	0.836018	-0.119393	-1.51024	1
			251	-0.772091	1.31601	0.562338	-0.880743	0.86671	-0.296453	0.11899	-0.960374	-0.0394664	0.211129	1
			253	0.00374851	-0.144923	0.128607	0.119836	-0.252674	-0.368378	-0.199321	-0.960374	-0.601303	0.438199	1
			255	0.862716	0.0342022	-0.951986	0.181358	0.211524	0.237171	-0.106703	-0.0231257	0.19774	-0.242521	1
			256	0.482379	0.540882	-0.575006	0.110166	0.987871	0.248225	0.0463788	0.415586	-0.240781	0.228179	1
			264	0.232976	0.603389	-0.133947	0.104173	0.364879	-0.529199	0.261805	0.47674	0.622671	-2.18278	1
			267	-1.04753	-0.267066	1.19173	-0.622572	-0.126727	-1.08786	-0.306943	0.117462	-0.889287	0.327386	1
			268	-0.0432037	0.883912	0.00413272	-0.400833	0.983303	0.0811853	0.126202	-0.264996	0.175466	0.0683708	1
			273	-0.663154	-0.421591	0.625285	-0.941863	-0.332723	0.520811	0.903473	1.30875	-0.856752	0.589785	1
			277	-0.504106	-0.017027	0.850741	-0.756571	0.159753	-0.25354	-0.437563	-0.344468	-0.725294	0.281646	1
			278	-0.347276	-0.233966	0.744052	-0.418051	-0.362307	-0.313988	-0.816132	-0.4346	-0.593322	0.273237	1
			282	-0.674706	-1.05081	0.763291	-1.06499	-1.12386	0.314623	0.541867	0.836018	-0.359986	1.02362	1
			285	1.22625	0.0559398	-1.27455	2.02886	0.630477	1.19002	-0.450366	1.1953	0.067938	0.282528	1
			286	-1.44613	0.928641	1.57107	-1.07073	1.37811	0.556921	-0.262746	1.34927	-0.327965	0.0241064	1
			290	-0.643889	0.575643	-0.0455829	-0.817069	1.20235	0.0439783	-0.315522	1.09265	0.929077	-1.52879	1
			293	0.792901	-0.596055	-0.275242	0.748144	-0.824765	-0.771308	-0.990442	-0.960374	0.427248	0.641751	1
			294	0.0957712	-0.226532	0.680072	-0.119119	-0.120637	-1.16862	-0.888546	-0.960374	-0.278954	0.450442	1
			296	0.864922	0.646817	-0.825522	0.916142	0.246546	0.396538	0.0205583	-0.0621777	0.472296	-1.94823	1
			301	0.371201	0.524166	-0.49709	0.210308	-0.0614697	0.0889952	0.473166	0.787467	0.695723	-2.04186	1
			311	1.47945	-1.1288	-0.749758	1.61375	-1.26482	1.78777	-0.17545	-0.960374	-0.92481	-0.624499	1
			314	0.611634	1.17949	-0.722234	0.0498136	0.707046	0.7206	-0.270853	-0.568434	0.536502	-0.0851939	1
			316	0.97363	1.05701	-1.04981	0.85728	-0.384712	0.191807	0.600292	-0.960374	1.13495	-2.65276	1
			317	-0.678512	-0.386551	0.71063	-0.628657	-0.544375	-1.29203	-0.132421	0.237221	-0.980229	0.686943	1
			320	-0.370897	-0.904	0.476693	-0.71567	-0.921346	-0.434376	0.93207	0.47674	-0.939713	1.02988	1
			322	0.365965	-0.0938367	-0.185274	-0.0765812	0.0314135	-0.385291	-0.44727	0.0661361	-0.305338	0.248735	1
			325	-0.211742	1.30146	-0.612024	-0.733999	1.30263	1.53523	-0.612664	0.211186	1.62434	0.0834908	1
			332	0.242655	-0.638669	-0.0315964	0.0594361	-0.622249	-0.651344	-0.631061	-0.4346	-0.477826	0.287056	1
			333	0.425824	-0.257877	-0.369036	0.810889	-0.130208	-0.561933	0.59622	-0.217039	-0.254399	-0.0887605	1
			334	0.867307	-0.0574181	-0.696061	0.810889	-0.191767	-0.853465	0.490821	-0.241817	-0.254399	0.051936	1
			336	1.52055	-0.271266	-1.32207	1.87223	-0.594406	0.880515	-0.383955	-0.520441	0.596287	0.168144	1
			338	-0.139455	0.857753	0.0287445	-0.630349	1.09511	0.279141	-0.197749	-0.229638	0.268027	-1.20502	1
			339	1.1832	-0.386551	-1.24968	1.3502	-0.544375	1.27479	-0.798904	-0.582186	0.495794	0.492554	1
			348	-0.895675	-0.580906	1.12421	-0.791278	-0.498042	-1.44675	-0.6607	0.0661361	-1.0637	0.945459	1
			350	0.249998	-0.282215	0.19129	0.157715	-0.45345	0.574632	-0.757796	-0.960374	-0.286935	0.11817	1
			351	1.124	0.737132	-0.739179	1.0258	0.799059	-0.669048	0.0513952	0.697834	0.614176	-2.2099	1
			355	-0.924975	0.882602	0.00667295	-0.922026	1.38986	1.05661	-0.415928	0.220816	1.77165	-1.37137	1
			357	0.232717	-0.638669	0.0270098	0.120867	-0.622249	-0.0734997	-0.465254	-0.393092	-0.733789	0.479034	1
			359	0.910819	-0.10309	-0.90937	1.0601	0.0107486	-0.257531	-0.603091	-0.176493	1.03413	0.214757	1
			361	0.160278	0.25273	-0.376056	-0.123846	0.63374	-0.237687	0.488946	1.06057	-0.00693081	0.277315	1
			364	-1.14097	0.19916	1.35171	-1.05423	0.65223	0.594514	-0.0610804	-0.960374	-0.290436	-1.40714	1
			365	0.0481188	-0.596055	0.463812	-0.143636	-0.824765	-1.18613	-0.841338	-0.960374	-1.0637	0.750595	1
			369	0.581998	-0.95251	-0.470949	0.398476	-0.993564	-0.225191	-0.619558	-0.447119	-0.477312	0.911005	1
			372	0.548827	0.582979	-0.893176	0.120992	0.431442	0.237886	0.374675	0.656379	1.208	-2.0397	1
			376	-0.190997	0.497907	0.0462092	-0.66435	0.923919	-0.0373212	-0.246409	-0.115013	0.199507	-0.0331455	1
			382	0.839688	-0.120747	-0.848791	0.54	0.166932	-0.0317304	0.0586176	0.47674	-0.149325	0.199126	1
			385	-0.0416104	-0.144923	0.208307	-0.049139	-0.252674	-0.985564	-0.0721956	-0.960374	-0.684264	0.305552	1
			386	-0.339389	0.295274	0.334251	-0.759771	0.589583	-0.300185	-0.346218	1.25057	-0.477826	0.173565	1
			390	1.23384	-0.596055	-0.3203	1.70243	-0.824765	-1.31467	-0.990442	-0.960374	-1.0637	0.75656	1
			392	1.8608	-0.144923	-1.09727	2.87895	-0.252674	-0.501794	-0.662057	-0.960374	-0.601303	0.448527	1
			395	0.652445	-0.226532	-0.607859	0.501439	-0.120637	-0.478499	1.85653	-0.960374	0.0534034	0.0939939	1
			398	1.09359	-0.380655	-1.16719	0.731224	-0.351431	-0.239745	0.468156	0.271438	-0.221863	0.382837	1
			399	0.43758	0.765794	-0.601769	0.103331	0.266993	0.336785	0.610503	0.117462	0.993616	-2.13542	1
			402	0.255669	-0.458763	0.368125	-0.170533	-0.623989	-1.50622	-0.819859	-0.960374	-1.0637	0.710514	1
			406	-0.138444	-0.775962	0.306513	-0.138685	-0.823025	-0.900595	-0.306229	-0.190491	-0.674355	0.517465	1
			408	0.0655376	-0.775962	0.653683	-0.471178	-0.823025	-0.796808	-0.850837	-0.326353	-1.10473	0.696036	1
			409	0.223484	-0.919293	-0.208024	-0.22519	-0.984428	0.161168	2.77439	0.579391	-0.277576	-0.288995	1
			414	0.990364	-0.596055	-0.160904	1.40621	-0.824765	-1.29725	-0.963033	-0.960374	-1.0637	0.755537	1
			416	0.177036	-0.775962	0.444441	-0.302535	-0.823025	-0.721737	-0.887343	-0.37776	-0.410926	0.68267	1
			420	1.28711	-0.991505	-1.31938	1.57605	-1.06404	-0.900207	2.00456	-0.960374	-0.643748	1.02171	1
			426	0.489121	-0.596055	-0.022223	0.280559	-0.824765	-0.498522	-0.930319	-0.960374	-0.367967	0.770632	1
			429	0.295727	-1.1288	-0.0106737	0.706047	-1.26482	-0.288246	-0.289353	-0.960374	-0.947693	1.30804	1
			433	-1.20768	0.371662	1.16385	-1.02203	0.804497	0.329941	0.830538	3.72587	-0.552806	0.113879	1
			436	1.35106	1.74971	-1.09963	1.64618	-0.692727	0.143478	1.22679	-0.960374	2.937	-3.91882	1
			437	0.128043	-0.531633	0.0125295	-0.487839	-0.466936	0.2554	1.19684	1.1953	-1.03117	0.972484	1
			438	-0.29246	0.00899856	0.278794	-0.330859	-0.561342	-0.821898	0.052486	0.636419	0.192806	-1.92601	1
			441	-0.485044	0.631651	0.327674	-0.577539	1.13775	-0.258987	-0.13583	0.0422637	0.341388	0.0067278	1
			444	-0.752045	-0.59016	0.992259	-0.676632	-0.63182	-1.49308	-0.375752	0.117462	-1.0637	0.448854	1
			445	-0.422953	-0.775962	0.730949	-0.791504	-0.823025	-0.917796	-0.685993	-0.217039	-1.10422	0.708465	1
			447	0.545712	-0.536604	-0.19826	0.588364	-0.230269	-0.0171703	-0.361783	-0.4346	-0.0344729	-1.30339	1
			448	0.328461	0.824541	-1.61095	0.0315515	1.30655	2.38341	-0.193611	0.338223	2.48126	-0.579488	1
			449	-1.04983	-0.195308	1.11331	-0.889323	-0.382972	0.757447	-0.933405	-0.241817	0.308061	0.310789	1
			453	-0.9413	-0.178283	0.859943	-0.954225	-0.0294935	-0.387841	-0.258906	-0.217039	-0.111412	0.14068	1
			457	0.341699	-0.465888	-0.309111	-0.762134	-0.098884	0.519084	0.610082	-0.361576	-0.0424535	-0.823703	1
			458	-0.848093	-0.180665	0.804309	-0.764861	0.00900838	0.0920213	-0.565474	1.50325	0.14293	0.300187	1
			461	0.941106	-0.638669	-0.445292	0.740084	-0.622249	-0.171282	-0.625305	-0.50172	-0.733789	0.491878	1
			462	0.527816	-0.0243181	-0.465194	0.151956	-0.314234	0.29002	-0.712842	-0.537693	-0.181347	0.261296	1
			463	-0.867308	-0.204368	0.952674	-0.817666	-0.0917057	-0.541196	-0.452014	1.12576	-0.552806	0.275609	1
			467	1.48699	-0.919293	-1.4292	1.80953	-0.877189	-0.0960057	-0.0820816	0.0661361	-0.456497	0.222684	1
			470	-0.872364	2.01729	0.0118963	-0.646586	1.81012	1.73787	-0.285626	-0.960374	2.4834	-2.22082	1
			472	0.0545023	-0.452145	0.0566764	-0.0289196	0.00552798	0.11388	0.0880303	0.836018	-0.472319	-1.03712	1
			475	-0.196902	-0.596055	0.478688	-0.336666	-0.824765	-0.078344	-0.778647	-0.960374	-0.5829	0.794759	1
			477	-0.0657433	0.838952	0.123643	-0.277825	0.75947	-0.287303	-0.344377	-0.960374	0.258427	0.072672	1
			478	-2.3125	0.341587	1.93251	-1.07372	0.988524	1.1546	-0.0657397	0.836018	0.0256048	0.218406	1
			481	-0.000374118	-0.0633134	0.153559	-0.161877	-0.384712	-0.779835	-0.356034	-0.960374	-0.684264	0.698894	1
			482	-0.345933	-0.919293	0.377934	-0.71567	-0.984428	-0.765707	0.93207	0.47674	-0.939713	1.02206	1
			484	-0.319003	0.562047	-0.455781	-0.563092	1.23172	1.28495	-0.614194	0.616946	1.76229	-0.0951478	1
			488	0.401852	-0.338382	-0.117735	-0.0232209	-0.0294935	-0.0321042	-0.323993	-0.49175	0.271915	-0.979826	1
			492	0.328461	0.824541	-1.61095	0.0315515	1.30655	2.38341	-0.193611	0.338223	2.48126	-0.579488	1
			493	0.473091	-0.144923	0.0014222	0.120867	-0.252674	-0.344019	-0.755233	-0.960374	0.138287	0.127355	1
			497	-0.287416	0.0316254	0.324056	-0.61041	0.0251052	0.316089	-0.303859	-0.326353	-0.0394664	0.0420504	1
			498	-0.56202	-0.194473	0.474526	-0.756571	0.0801391	0.498284	-0.244515	-0.960374	0.559108	-1.43288	1
			500	-1.01782	-0.610202	1.0166	-0.889481	-0.550031	-0.242035	0.562562	0.47674	-0.980229	0.560577	1
			506	1.09797	-0.775962	-0.0322848	1.23291	-0.823025	-1.49675	-1.12986	-0.520441	-1.10422	0.76658	1
			507	-0.336281	-0.718199	0.723364	-0.336666	-0.698818	-1.05185	-0.886188	-0.0231257	-1.0637	1.02918	1
			508	0.438944	-0.462817	-0.70535	0.29791	-0.00969877	0.434689	-0.20167	1.43482	-0.189328	0.815454	1
			511	2.07723	-0.596055	-1.74738	2.85306	-0.824765	0.0375716	-0.67896	-0.960374	0.539759	0.400653	1
			512	-0.253568	1.902	-0.333126	-0.865663	2.07832	-0.196742	0.698047	0.145098	1.208	-1.90961	1
			513	-0.273673	-0.458763	0.644744	-0.510863	-0.623989	-1.05623	-0.70881	-0.960374	-0.940227	0.668316	1
			517	0.462415	-0.775962	-0.102247	0.0534225	-0.823025	-0.391817	-0.135331	-0.286727	-0.684778	0.630587	1
			518	-1.07815	-0.185457	1.15944	-0.903945	-0.258765	-0.497966	-0.553971	0.237221	-0.757316	0.698355	1
			519	0.561231	-0.363824	-0.190254	0.291273	-0.321412	0.900289	-0.740819	-0.960374	0.659496	0.332911	1
			530	0.707103	-0.0499837	-0.896525	0.646835	0.0499031	1.15524	-0.671801	-0.960374	1.61699	-0.137765	1
			532	-0.313645	-0.411621	0.421883	-0.585179	-0.0312337	0.477606	-0.213385	0.697834	-0.217384	-1.00385	1
			535	0.989923	-1.1288	0.089418	0.132626	-0.662491	0.0485353	-1.00641	-0.960374	-1.07078	-0.777989	1
			537	0.903723	-0.0633134	-0.950571	0.634822	-0.384712	0.141256	0.737313	-0.960374	0.225341	-0.310745	1
			538	-0.422163	-0.23624	0.522026	-0.782756	0.334208	-0.419319	0.577817	-0.13127	-0.289922	-1.0112	1
			540	-0.0809786	-0.956016	0.603859	-0.762599	-0.863267	0.664665	-0.0456202	-0.960374	-0.92481	-0.585987	1
			545	0.916487	0.0189102	0.126766	1.13062	0.118641	-1.13759	-0.811059	-0.960374	-0.632863	-1.83188	1
			546	1.48335	-0.282215	-0.925672	1.20315	-0.45345	-0.541778	-0.841338	-0.960374	0.393736	0.0390044	1
			550	-0.367953	-0.568634	0.695211	-0.390379	-1.26482	0.176216	3.67921	-0.960374	-0.350627	-1.96272	1
			556	-0.749833	-0.338382	0.994892	-0.898892	-0.0294935	0.386416	-0.291404	-0.37776	-0.0670085	-0.876761	1
			561	-0.230732	-0.508694	0.227254	-0.506621	-0.418428	-1.05624	-0.555762	0.526296	-0.732761	1.08934	1
			562	1.60491	-0.0633134	-1.66893	2.04439	-0.384712	0.176625	-0.22819	-0.960374	0.0464197	0.275849	1
			566	-0.164692	-0.37851	0.177772	-0.25027	-0.360567	-0.63378	0.522691	0.764163	-0.37839	0.331444	1
			567	1.41235	-0.670793	-1.06022	1.77918	-0.656618	0.577082	-0.664916	0.47674	0.0415661	1.10605	1
			568	0.0396435	0.564367	0.0265866	-0.447541	0.357919	-0.27456	-0.18712	-0.960374	-0.13285	0.387484	1
			570	0.412824	-0.718199	0.245667	0.280559	-0.698818	-1.21007	-1.00287	-0.286727	-1.0637	1.03567	1
			572	0.108314	-0.148541	-0.367242	-0.236915	0.0203197	0.797713	-0.314311	-0.176493	0.371995	0.0367989	1
			573	0.0896233	-0.450616	0.131123	-0.381887	-0.101712	0.394012	-0.289439	0.117462	-0.0344729	-1.0054	1
			580	1.17501	-0.458763	-1.05214	0.674436	-0.623989	-0.829143	1.24691	-0.960374	-0.213883	0.523015	1
			581	1.17131	0.176969	-0.59982	0.886555	0.799059	-0.649915	-0.54259	0.47674	0.134436	0.25907	1
			585	0.239018	-0.638669	0.0224029	0.120867	-0.622249	0.0441354	-0.465254	-0.393092	-0.642333	0.479034	1
			590	0.598098	-0.599674	-0.820812	0.229704	-0.551771	-0.896631	0.0856078	0.0661361	-0.05787	0.521231	1
			591	0.218907	-0.59016	0.081525	0.148134	-0.63182	-0.248098	-0.481789	-0.326353	0.216958	0.434402	1
			593	0.329828	-0.775962	0.0328796	0.247069	-0.823025	-0.997508	-0.901645	-0.421456	0.152289	0.372139	1
			600	-0.081877	0.838952	0.146866	-0.660769	0.75947	-0.259321	-0.395259	-0.960374	0.114104	0.487482	1
			601	1.1043	-0.697971	-1.51385	0.931941	-0.682069	0.0633598	0.0603937	0.283282	0.281054	0.556523	1
			602	1.1662	0.653128	-1.36496	1.0514	0.837561	0.466261	0.383068	0.836018	-0.0658506	0.0376255	1
			606	-0.342761	-0.747746	0.665293	-0.932822	-0.26094	0.710696	0.0908812	-0.960374	-0.365961	-1.06372	1
			609	0.415989	0.472655	-0.875286	0.937546	1.00854	0.552681	-0.116267	2.11916	0.447489	0.498233	1
			615	-0.615327	0.214785	0.267158	-0.874981	0.429049	0.167345	-0.302431	1.28512	-0.114347	0.553107	1
			624	1.07289	-0.152712	-0.883825	0.422298	0.0255403	0.197816	-0.454274	-0.520441	0.689355	0.0178133	1
			625	-0.270835	0.631651	0.184487	-0.453244	1.13775	0.166465	-0.211824	-0.0231257	0.381904	0.0848404	1
			627	0.123476	-0.580906	0.468865	-0.170533	-0.498042	-1.44936	-0.893563	-0.30714	-1.0637	0.991907	1
			631	0.0579989	0.0316254	0.0502851	-0.30996	-0.0821346	0.686495	0.0788903	-0.960374	-0.294915	0.0638315	1
			632	1.21773	-0.703106	-0.986631	0.579947	-0.491952	0.177801	0.991184	-0.960374	-0.289922	-1.23885	1
			634	-0.0571152	-0.0243181	-0.169129	-0.299821	-0.314234	0.515429	-0.421908	-0.37776	-0.0554277	0.531066	1
			641	0.0451309	-0.452145	0.134791	-0.240564	0.00552798	0.99549	0.178042	0.887344	-0.0749891	-1.04678	1
			647	0.262483	-0.260185	-0.152665	0.23137	-0.024708	0.119007	-0.0994637	0.836018	0.225341	0.0749528	1
			650	-0.373421	-0.580906	0.7911	-0.510863	-0.498042	-1.41441	-0.803005	-0.161977	-1.0637	0.989046	1
			656	-0.337525	1.09353	-0.870179	-0.945829	1.47426	1.38257	-0.0160964	-0.0981055	1.9331	-2.06045	1
			659	-0.446553	0.161781	0.502184	-0.835183	0.179548	0.0247927	0.0740425	-0.361576	-0.136079	-1.46902	1
			660	1.11597	-0.233966	-1.46643	1.40499	-0.362307	2.18841	-0.914165	-0.656758	1.15913	0.489787	1
			664	-0.0895053	0.838952	0.0305701	-0.725823	0.75947	-0.17852	-0.210538	-0.960374	0.114104	0.357025	1
			665	-0.616408	-0.736966	0.299682	-0.719955	-0.409075	0.208414	-0.176717	0.887344	-0.181347	0.59175	1
			667	-0.992043	0.426815	0.497238	-0.810737	0.257857	2.18956	-0.404628	-0.481336	0.485687	-0.0109635	1
			669	0.995556	-0.638669	-0.582856	1.11831	-0.622249	0.408032	-0.745521	-0.561175	-0.0133051	0.169428	1
			670	-0.672234	0.387819	0.761277	-0.583628	0.187379	-0.473211	-0.311108	-0.960374	-0.24449	0.210138	1
			672	0.432819	-0.282215	-0.451161	0.339989	-0.45345	0.83264	-0.59994	-0.960374	0.116707	0.495921	1
			674	-0.192749	0.387819	0.0454177	-0.311322	0.272431	-0.249037	0.109785	-0.960374	-0.221863	0.355787	1
			676	0.419975	-0.596055	-0.303268	0.444473	-0.824765	-1.27922	-0.234306	-0.960374	-0.732761	0.7501	1
			679	-0.422825	0.387819	0.213654	-0.713982	0.272431	0.234601	0.109785	-0.960374	-0.221863	0.45445	1
			681	-0.371727	0.525112	0.136835	-0.60504	0.473207	0.362488	0.0571195	-0.960374	-0.0983862	0.348655	1
			682	0.430666	0.172731	-0.25668	-0.100215	0.15475	-0.747618	-0.259987	0.887344	-0.254399	-0.0168489	1
			683	1.15839	-0.452868	-0.571794	1.01344	-0.349255	-0.329004	-0.758873	-0.49175	-0.477826	0.64593	1
			688	0.516788	1.00217	-0.373263	-0.064696	0.495394	0.150401	-0.543642	-0.960374	0.256499	0.492011	1
			689	0.288943	-0.380655	-0.291939	0.19195	-0.351431	-0.910394	0.218766	0.579391	-0.651728	0.479315	1
			692	-0.0781644	0.469429	0.119163	-0.4	0.0553412	-0.988127	-0.199321	-0.960374	-0.388299	0.565661	1
			696	0.50685	-0.0633134	-0.522102	0.489434	-0.384712	0.807214	-0.778647	-0.960374	0.116707	0.502769	1
			697	2.24779	-1.1288	-2.08682	3.45475	-1.26482	0.254345	1.45242	-0.960374	0.225341	-0.267355	1
			699	0.183712	-0.324829	-0.213078	-0.342601	-0.250934	0.265172	0.74089	-0.161977	0.239782	-0.210285	1
			701	1.08703	-1.0898	-0.832044	1.61939	-1.19434	-0.339207	-0.739297	-0.470449	-0.477312	1.16493	1
			702	0.744332	-1.05081	-0.524636	0.706293	-1.12386	-0.679411	-0.764555	-0.00229792	-0.477312	1.15778	1
			703	-0.240073	-0.233966	0.433631	-0.322221	-0.362307	-0.618424	-0.677543	-0.421456	-0.469331	0.271768	1
			706	0.23024	0.498926	-1.03669	-0.720357	1.29719	2.12922	-0.414545	-0.447119	1.1275	0.175316	1
			708	0.61002	0.575967	-0.689975	0.436875	0.804932	-0.743093	0.976566	0.526296	0.215982	0.195888	1
			709	2.00561	-0.0243181	-1.88073	1.83256	-0.314234	0.766055	-0.773218	-0.676733	0.86826	0.00754008	1
			713	-0.809029	0.262318	0.751189	-0.91196	0.372493	-0.865045	-0.515744	0.237221	-0.333423	-0.112929	1
			714	-0.436945	0.207913	0.487413	-0.336411	0.274171	-0.176683	-0.263384	-0.326353	-0.222377	-0.16486	1
			715	0.717476	-0.144923	-0.621839	0.758633	-0.252674	-0.124822	0.29058	-0.960374	-0.0234556	-0.515512	1
			718	0.952981	0.137408	0.100455	1.24272	0.187379	-1.15739	-0.856464	-0.960374	-0.632863	-1.83691	1
			719	0.223814	-0.638669	-0.0201427	0.00465852	-0.622249	0.347106	-0.526412	-0.4346	-0.427401	0.503056	1
			721	0.721954	0.487222	-0.772227	0.0889646	0.997877	-1.02913	0.193682	0.616946	0.243875	-1.6656	1
			734	0.477814	-0.282215	-0.495545	0.639268	-0.45345	0.642133	-0.949541	-0.960374	0.463259	0.514362	1
			735	0.415035	-0.290005	-0.201567	0.167572	-0.175235	-0.310561	-0.25697	-0.361576	-0.733275	0.21775	1
			736	-0.703145	-0.452868	0.635541	-0.818194	-0.431045	-0.608858	-0.115235	-0.217039	-0.72478	0.50211	1
			738	0.739663	0.250267	-1.12498	0.641756	0.0873174	3.45935	-0.763206	-0.672951	2.12507	0.0410919	1
			739	1.12135	-0.152972	-0.845325	0.157153	0.126254	0.574995	-0.705376	-0.353143	0.306187	0.226245	1
			740	-0.337415	-0.307601	0.277887	-0.161877	-0.132818	-0.632066	-0.406876	0.636419	-0.436796	1.01858	1
			742	1.62008	-0.540372	-1.38872	1.41679	-0.491952	0.647583	0.0199366	-0.960374	0.434655	0.419679	1
			743	-0.440804	-0.596055	0.697516	-0.514961	-0.824765	-0.640763	-0.696159	-0.960374	-0.797832	0.768704	1
			744	-1.17214	-0.170364	1.05646	-1.06104	-0.0518986	1.08721	1.52554	-0.960374	0.052098	-1.54899	1
			748	-0.590548	0.137974	0.799287	-0.664508	0.728581	-1.40856	0.710008	1.73421	-0.5829	0.113683	1
			751	-0.920089	0.878208	0.374083	-0.810589	0.729234	0.963643	-0.611583	-0.960374	1.13382	-0.350579	1
			752	-0.157302	-0.484991	0.272344	-0.339941	-0.442356	-0.856297	-0.459342	1.34927	-0.643748	0.919145	1
			755	1.17065	-0.204224	-1.43518	1.18117	-0.312494	0.0815847	-0.458099	-0.31689	0.704705	0.0815017	1
			756	-1.34906	-1.05081	1.3736	-1.08495	-1.12386	0.597251	0.0323161	1.30875	-0.757316	1.09504	1
			758	0.594324	0.168918	-0.744468	0.225876	0.225881	0.0863981	0.0959309	-0.4346	0.331479	0.0151497	1
			762	0.19387	-1.1288	0.107803	0.35595	-1.26482	-1.71766	1.311	-0.960374	-0.972248	0.934152	1
			764	0.0763483	-0.252595	0.138635	-0.428554	-0.277255	0.19632	-0.767456	-0.447119	0.158038	0.206611	1
			765	0.271487	-0.869625	-0.118012	-0.484041	-0.662491	1.44565	1.54328	-0.960374	0.116767	-1.09306	1
			771	-0.158864	-0.243363	0.287049	-0.513511	0.192817	0.382055	-0.140521	0.999327	-0.611726	0.252628	1
			773	0.595789	-1.0898	-0.505766	0.467207	-1.19434	-0.349097	0.0210613	-0.264996	-0.651728	1.04677	1
			775	-0.203875	-0.423126	-0.0891057	-0.287113	-0.381232	0.0301089	-0.621195	-0.0430671	-0.229844	0.580452	1
			780	0.15315	-0.869625	0.0383964	-0.347158	-0.662491	0.174688	0.182944	-0.960374	-0.381377	-0.922013	1
			781	-0.621386	-0.452868	0.693944	-0.72881	-0.431045	-0.256857	1.12576	-0.0621777	-1.22821	0.334941	1
			784	0.380407	-0.660121	-0.380929	-0.256256	-0.382102	0.616667	1.92269	-0.0231257	-0.0749891	-1.06854	1
			786	0.444088	0.670646	-0.58684	0.0449059	1.20822	0.391038	-0.329556	0.0500968	0.80186	0.0590452	1
			790	0.14621	-0.783235	0.187773	-1.04275	-0.461716	1.24935	0.320708	-0.960374	-0.365961	-0.715931	1
			792	1.12432	-0.0633134	-0.75994	0.781055	-0.384712	-0.210084	-0.59994	-0.960374	-0.43731	0.712365	1
			795	0.564095	-0.418492	-0.516577	0.113335	-0.00534827	0.641874	0.378764	-0.960374	0.172479	-1.05994	1
			801	-0.707896	-0.330867	0.625524	-0.985309	-0.12651	-0.0513368	-0.0447084	-0.217039	-0.487735	0.50209	1
			802	-0.927952	0.112974	0.477013	-0.643867	-0.113458	2.29683	-0.453441	-0.421456	0.244988	0.217932	1
			808	-0.440804	-0.596055	0.697516	-0.514961	-0.824765	-0.249357	-0.696159	-0.960374	-0.797832	0.785639	1
			811	0.782778	0.814518	-0.0202504	-0.00828126	1.06205	0.49111	-0.705381	-0.960374	0.26483	-2.12892	1
			813	0.18402	0.0654634	-0.604968	-0.32293	0.449714	-0.258341	-0.193418	1.03562	0.313589	0.515673	1
			816	1.03495	-0.363824	-0.919786	1.06377	-0.321412	0.717967	-0.82928	-0.960374	0.627252	0.52932	1
			818	0.50685	-0.0633134	-0.522102	0.489434	-0.384712	0.807214	-0.778647	-0.960374	0.116707	0.502769	1
			819	-0.125272	-0.718199	0.525335	-0.143636	-0.698818	-0.78169	-0.934059	-0.13127	-0.980743	1.10611	1
			826	0.654767	-0.282215	-0.674904	0.750128	-0.45345	0.645706	-0.907661	-0.960374	0.874083	0.280093	1
			827	0.474313	-0.282215	-0.484581	0.542949	-0.45345	0.619704	-0.883574	-0.960374	0.463259	0.506137	1
			829	0.28676	-0.510224	-0.28606	0.282357	-0.311188	-0.640296	-0.384709	0.941688	-0.517828	0.932797	1
			834	-0.0614567	-0.596055	0.405254	-0.143636	-0.824765	-0.940303	-0.841338	-0.960374	-0.277576	0.622093	1
			838	-0.711219	-0.59016	0.799745	-0.637576	-0.63182	-1.23843	0.165014	0.17419	-1.0637	0.449722	1
			844	1.57474	-0.775962	-0.497659	1.76719	-0.823025	-1.57723	-1.14854	-0.568434	-1.10422	0.778304	1
			849	-0.668488	0.301109	0.630949	-1.05762	0.558042	1.06295	0.221283	1.25057	-0.0319997	0.152164	1
			852	1.02009	-0.736966	-1.00401	1.07012	-0.752547	-0.607837	-0.500005	-0.146913	0.0335854	0.639221	1
			857	0.633035	-0.596055	-0.346362	0.745661	-0.824765	-0.41541	-0.625743	-0.960374	-0.323711	0.534001	1
			861	0.630791	-0.436732	-0.61022	0.986387	-0.195248	0.968256	0.112682	0.697834	-0.17155	0.0104363	1
			869	-0.338745	0.137974	0.567113	-0.490353	0.728581	-0.616131	0.392469	1.30875	-0.367967	0.194193	1
			870	0.463029	-0.495412	-0.286897	0.618421	-0.268119	-0.578086	9.11207e-05	-0.0981055	-0.477312	0.35886	1
			874	1.37879	-1.1288	-1.13361	1.81041	-1.26482	-0.576049	4.28063	-0.960374	-0.367967	0.657102	1
			875	0.0583314	-0.307601	0.00449193	0.0219628	-0.132818	-0.224631	-0.625635	0.38692	-0.254399	1.01931	1
			877	-0.486341	-0.880297	0.223474	-0.485846	-0.848475	0.588222	-0.332375	0.741471	0.0335854	1.14947	1
			880	-0.000374118	-0.0633134	0.153559	-0.161877	-0.384712	-0.727781	-0.356034	-0.960374	-0.643748	0.711099	1
			881	-0.820289	-0.452868	1.00068	-0.752135	-0.431045	-0.986098	-0.536358	-0.13127	-0.808255	0.515533	1
			883	-1.47617	0.0706208	1.44569	-1.04063	-0.0116565	-0.144161	-0.329433	-0.217039	-0.459422	0.045531	1
			887	-0.225874	-0.718199	0.374601	-0.199671	-0.698818	-1.25444	1.07746	0.579391	-0.7168	0.872923	1
			888	-0.953331	-0.616715	1.1175	-0.903974	-0.291176	0.832691	1.3202	-0.960374	-0.577906	-1.40622	1
			891	1.10644	0.0486135	-1.41947	0.950423	0.092538	0.433092	-0.213289	-0.190491	1.35107	-0.0704905	1
			893	0.4901	-0.501117	-0.487721	0.458606	-0.522188	0.534994	-0.811994	-0.960374	0.463259	0.538619	1
			894	-0.321093	-0.452868	0.419736	-0.499264	-0.431045	-1.10651	-0.244515	-0.13127	-0.816236	0.297815	1
			895	0.184641	-0.596055	-0.0607728	0.291123	-0.824765	-0.650743	-0.295245	-0.960374	-0.692245	0.748096	1
			897	0.579025	-0.267066	-0.463128	1.14164	-0.126727	-0.780244	-0.162052	-0.30714	-0.436796	0.301477	1
			898	1.02577	-1.1288	-0.746817	1.47737	-1.26482	-0.928582	3.29076	-0.960374	-0.5829	0.722239	1
			902	0.126102	-0.540372	0.206453	-0.0630451	-0.491952	-0.82521	-0.213585	-0.960374	-0.1681	-0.00819448	1
			908	-1.95879	-0.596055	2.30301	-1.08606	-0.824765	-2.32856	-1.14817	-0.960374	-1.48366	0.693144	1
			910	0.560893	-0.744534	-0.3248	0.729154	-0.605935	-0.542106	-0.593844	0.445498	-0.436796	0.937981	1
			912	0.574189	-0.193575	-0.224534	0.0297592	-0.0107864	-0.329595	0.410524	-0.37776	-0.37839	0.246579	1
			918	0.453972	-0.115584	-1.12207	-0.0143548	0.23741	0.999678	-0.0498597	0.38692	0.751323	-0.0559677	1
			920	0.837495	-0.282215	-0.78074	0.87045	-0.45345	0.90369	-0.800759	-0.960374	0.235584	0.0499792	1
			924	0.975061	0.107296	-0.858459	0.997913	-0.431045	-0.426116	-0.0545524	-0.407638	0.48079	-2.02892	1
			936	-0.729528	-1.1288	1.09923	-0.695019	-1.26482	0.544469	5.32018	-0.960374	-1.0453	0.130358	1
			937	0.797591	-0.429165	-0.800299	0.269943	-0.23462	-0.460455	0.41726	0.697834	-0.130922	0.467118	1
			939	-0.300672	-0.155859	0.200986	-0.723317	-0.089748	-1.20069	0.250104	1.43482	-0.643748	0.37187	1
			943	1.67614	-0.419768	-1.38748	1.47576	-0.553511	0.0506385	-0.609401	-0.588706	-0.05787	0.706432	1
			944	0.504289	-0.226532	0.125931	0.25578	-0.120637	-0.472515	-0.93805	-0.960374	0.750549	0.319778	1
			945	0.781326	-0.0123325	-0.659807	0.612966	-0.407552	-0.0689302	0.224374	0.741471	0.133886	-2.00686	1
			953	-3.20654	1.57966	2.53376	-0.924424	1.58106	0.677643	-0.117475	1.1953	-0.171438	-0.184763	1
			954	0.83732	0.366588	-0.825906	0.299942	-0.0107864	0.21305	0.496394	-0.393092	0.644783	-2.00103	1
			955	1.19627	0.366588	-0.902644	0.695627	-0.0107864	0.311949	-0.100536	-0.50172	0.429851	-1.94944	1
			959	0.135453	-0.59016	0.0708426	0.0409963	-0.63182	-1.08937	0.505025	0.0194765	-0.593322	0.528159	1
			961	0.895858	-0.0749113	-0.773533	0.352636	0.275041	0.374352	0.129496	-0.4346	0.0231625	0.166057	1
			965	1.93342	-1.1288	-0.462471	0.0726253	-1.26482	-1.09151	-1.32698	-0.656758	-0.778837	1.25128	1
			972	0.1718	-0.178283	0.0913085	-0.419802	-0.0294935	-0.909738	-0.37886	-0.4346	-0.735203	0.308943	1
			975	2.02382	-1.1288	-1.78077	3.0063	-1.26482	0.257317	1.30464	-0.960374	-0.254399	0.66951	1
			979	-0.225342	-0.00763004	-0.226124	-1.07538	-0.0518986	1.35715	-0.260447	-0.618204	0.331528	-0.423098	1
			981	-0.109315	-0.0506898	0.384046	-0.0891141	0.0997163	0.00878202	-0.535122	2.11916	-0.297357	0.726498	1
			982	0.15797	0.0406189	-0.220951	-0.51357	0.382716	0.539951	-0.410316	-0.190491	-0.280783	0.198999	1
			983	-0.719499	-0.28934	0.53017	-0.965291	-0.0133967	0.407267	0.616745	-0.264996	-0.123486	-0.84218	1
			987	0.316429	-1.0898	0.661814	0.642204	-1.19434	-1.85755	-1.31798	-0.326353	-1.13676	1.25935	1
			988	0.946636	-1.05081	-0.723967	0.923287	-1.12386	-0.0725284	-0.798087	-0.0621777	-0.221863	0.901173	1
			989	0.137003	0.302233	-0.447437	-0.0344107	0.370317	-0.395236	-0.239578	0.307668	0.281054	0.323203	1
			992	0.0206403	-0.198179	0.0166543	-0.795634	0.141046	-0.000725987	0.00344917	-0.50172	0.57366	-1.4121	1
			994	-1.02651	-1.1288	1.68788	-0.720822	-1.26482	-2.88667	-1.61724	-0.960374	-1.48315	1.67802	1
			995	1.30749	-0.0954939	-1.19183	1.61958	-0.45345	-0.00794325	0.590693	-0.960374	0.285102	0.0427084	1
			997	-1.07225	-1.1288	1.49312	-0.867278	-1.26482	0.584075	2.94447	-0.960374	-1.48366	0.661878	1
			999	-0.757037	-1.1288	1.21266	-0.755487	-1.26482	-0.127661	2.65843	-0.960374	-1.0453	0.61498	1
			1001	0.656155	2.9891	-1.00881	0.352233	0.0438124	0.547853	2.63978	-0.264996	4.32595	-4.42117	1
			1005	-0.499199	0.61177	0.208717	-0.735923	0.987653	0.570391	-0.245162	0.38692	0.505895	0.146278	1
			1009	-0.201477	-0.775962	0.83796	-0.625146	-0.823025	-0.814497	-0.807266	-0.264996	-1.10473	0.685953	1
			1011	0.258941	0.592023	-0.739127	-0.517984	0.924354	-0.0268219	-0.125166	1.26963	0.138659	0.430887	1
			1015	0.782637	0.0159296	-0.740762	0.149338	0.269603	0.200597	0.0764065	0.0422637	0.0231625	0.169387	1
			1021	-0.308132	0.222509	0.302454	-0.126659	0.376191	-0.283861	-0.659467	0.999327	-0.447219	0.47004	1
			1022	0.268833	-0.0109883	-0.166441	0.423067	0.157143	0.702998	-0.581044	-0.520441	0.742971	0.369007	1
			1026	0.439447	0.387819	-0.645939	0.159879	0.187379	0.00323608	-0.0246839	-0.960374	0.0785528	-0.0678023	1
			1029	0.615727	-0.0633134	-0.366941	0.421042	-0.384712	-0.337325	-0.592294	-0.960374	-0.214236	0.490698	1
			1033	-0.511175	-0.59016	0.769956	-0.53082	-0.63182	-0.417893	-0.496446	-0.0231257	-0.808255	0.450236	1
			1036	0.162545	0.675734	0.586285	-0.240416	1.02355	-0.67062	-0.674756	-0.960374	-0.0222022	-0.624394	1
			1037	0.0348543	0.387819	-0.0733943	-0.197173	0.187379	0.147033	-0.341433	-0.960374	-0.140831	0.429546	1
			1038	1.56612	-0.875887	-0.559431	0.229402	-0.893503	0.571498	-0.448244	-0.960374	-0.92481	-0.606019	1
			1040	-0.531338	-0.814957	0.875841	-0.636699	-0.893503	-1.0324	-0.92757	-0.960374	-0.267425	0.667415	1
			1042	-0.60983	-1.1288	1.03825	-0.497143	-1.26482	0.519425	0.628721	-0.960374	-1.13676	0.621059	1
			1043	2.24779	-1.1288	-2.08682	3.45475	-1.26482	0.676255	1.45242	-0.960374	0.184825	-0.292388	1
			1045	-0.530923	-1.1288	0.904036	-0.571803	-1.26482	1.13075	4.63819	-0.960374	-1.13676	0.602821	1
			1047	1.19627	0.366588	-0.902644	0.695627	-0.0107864	0.311949	-0.100536	-0.50172	0.429851	-1.94944	1
			1049	1.83084	0.629383	-1.7315	3.02489	-0.692727	1.2969	0.608661	-0.960374	1.83497	-2.1376	1
			1051	0.997956	-0.0633134	-0.521261	0.648978	-0.384712	-0.383242	-0.9511	-0.960374	0.555015	0.480118	1
			1053	1.01918	-0.429165	-1.25654	0.377441	-0.341859	-0.00402253	-0.272659	-0.0981055	-0.0658506	0.431617	1
			1054	0.982514	0.30621	-0.912327	0.826909	0.319417	1.13747	-0.790733	-0.960374	1.09318	0.214198	1
			1056	1.86045	-0.0633134	-1.83566	1.66913	-0.384712	-0.272149	0.911961	-0.960374	0.791468	0.256516	1
			1057	0.832064	-0.0633134	-0.643427	0.634822	-0.384712	0.134649	-0.646816	-0.960374	0.361603	0.456931	1
			1058	0.612789	-0.178575	-0.424599	0.859312	-0.156746	0.413929	0.0151886	0.787467	-0.190083	-0.054232	1
			1062	0.168339	1.07315	-0.89263	-0.597274	1.59977	0.271796	-0.0746908	0.408306	1.49091	-1.71587	1
			1063	0.188136	-0.596055	0.245914	0.0625328	-0.824765	-0.752885	-0.890596	-0.960374	-0.423549	0.673994	1
			1071	0.972652	0.266452	-0.553458	0.310813	0.354438	0.249897	-0.0350641	0.0194765	0.0514751	-0.0175157	1
			1076	-0.807012	1.07078	0.272749	-0.654382	1.61521	0.203903	0.386085	1.6059	0.283877	-1.81072	1
			1078	-0.903365	0.0373301	1.0525	-0.872579	0.171935	-1.67906	0.284798	0.47674	-0.757316	0.262926	1
			1079	0.390075	0.0505092	-0.243527	-0.281205	0.335949	-0.108102	-0.525325	-0.0621777	-0.0345843	0.342289	1
			1083	1.31084	-0.495412	-1.17043	1.11031	-0.268119	-0.19497	4.36144	0.579391	0.0213817	0.114031	1
			1084	-1.3802	-0.40308	1.4855	-1.00599	-0.291176	0.18437	-0.602951	-0.960374	-0.461351	0.302972	1
			1087	-0.162416	-0.495412	0.475167	-0.29764	-0.268119	-0.573044	-0.306943	0.117462	-0.5829	0.350522	1
			1091	-1.95886	-0.0278197	1.64189	-1.07023	0.316154	-0.271382	0.0453689	3.14566	-0.335431	0.300341	1
			1092	0.180693	-0.128495	-0.613823	-0.641713	0.110375	1.3173	-0.246476	-0.960374	0.520027	0.296258	1
			1096	0.350555	-0.551165	-0.138897	-0.100303	-0.561342	0.149626	-0.856271	-0.0231257	-0.386371	0.577307	1
			1100	0.0237987	0.850123	-1.0709	-0.317877	0.905429	1.63723	-0.531892	0.145098	1.00688	0.0608543	1
			1101	1.52925	-0.24322	-1.75498	1.65838	-0.382972	1.51709	-0.702312	-0.638632	1.09941	0.0382845	1
			1102	1.03228	-0.226532	-0.802065	1.47568	-0.120637	-0.557739	-0.0246839	-0.960374	-0.436796	0.209467	1
			1106	0.462542	-0.226532	0.0402282	0.474974	-0.120637	-0.565887	-0.628016	-0.960374	-0.072002	0.276681	1
			1107	0.585828	-0.226532	0.0887603	0.474974	-0.120637	-0.667329	-0.628016	-0.960374	-0.76581	0.287465	1
			1108	1.53479	-0.226532	-0.547846	1.39429	-0.120637	-0.731459	-0.777585	-0.960374	-0.76581	0.297126	1
			1113	1.42898	-0.566457	-1.34505	1.37703	-0.542635	-0.0214076	-0.268134	-0.0231257	0.07603	0.50993	1
			1114	0.83332	-0.226532	-0.362553	0.911095	-0.120637	-0.498346	-0.408385	-0.960374	-0.601303	0.253804	1
			1118	1.01382	-0.122759	-0.915316	0.336172	-0.212215	-0.685764	-0.302342	0.415586	-0.108809	0.734216	1
			1121	0.472191	-1.1288	-0.222162	0.966731	-1.26482	-0.592719	-0.421316	-0.960374	-0.947693	1.17349	1
			1124	1.10355	0.445217	-1.64902	0.0439271	0.803627	0.201059	-0.112152	1.22654	0.732517	0.263905	1
			1125	0.98723	0.313025	-0.85454	0.400119	0.357919	-0.103452	-0.102441	-0.545822	0.290963	0.0944229	1
			1128	-0.302262	-0.638669	0.334294	-0.632779	-0.622249	0.468646	-0.195933	-0.344468	-0.335945	0.505975	1
			1129	0.556937	-0.854212	-0.289767	0.26516	-0.863267	1.85065	-0.856346	-0.960374	0.250093	0.509432	1
			1132	0.323783	-0.596055	-0.156793	0.222989	-0.824765	-0.965518	2.32423	-0.960374	-0.542383	0.478313	1
			1137	0.515751	-0.0633134	-0.201783	0.218625	-0.384712	-0.169471	-0.895841	-0.960374	0.846962	0.457521	1
			1138	0.176799	-0.596055	0.184863	0.0625328	-0.824765	0.0548431	-0.890596	-0.960374	-0.062643	0.566843	1
			1139	0.492259	-0.323657	-0.230664	0.535648	-0.0793068	0.452597	-0.221863	1.37008	-0.550989	0.220973	1
			1146	0.286095	-1.1288	0.0176027	0.526812	-1.26482	-1.19493	-0.578416	-0.960374	-0.980229	1.29892	1
			1148	0.966184	-0.904	-0.670351	1.09843	-1.00314	-1.65561	-0.392824	-0.241817	-0.907177	1.17977	1
			1152	0.28098	-0.736966	-0.143315	0.307389	-0.752547	-0.0944906	-0.599853	0.117462	-0.0394664	0.584033	1
			1154	-0.532941	-0.919293	0.646357	-0.579633	-0.984428	-1.80202	-0.293411	0.307668	-1.19516	1.14911	1
			1155	0.114789	0.367513	-0.555538	-0.102706	0.198038	-0.188705	-0.59824	0.0997921	0.791951	0.438441	1
			1157	0.218029	-0.766708	0.0368038	-0.135052	-0.80236	-0.415545	-0.772318	-0.344468	-0.111412	0.570433	1
			1159	-0.292071	-0.919293	0.436251	-0.418824	-0.984428	-0.968413	-0.44456	0.117462	-0.939713	1.15333	1
			1161	-0.155808	-1.0898	0.617005	-0.143636	-1.19434	-1.64234	-0.934059	-0.13127	-1.19568	1.16242	1
			1164	0.521813	-0.596055	-0.331299	0.517455	-0.824765	-0.946138	0.154974	-0.960374	-0.72478	0.618287	1
			1166	0.401858	-1.1288	-0.0720674	0.706047	-1.26482	-1.19107	-0.496296	-0.960374	-1.19516	1.27057	1
			1169	-0.242874	-0.854212	0.651918	-0.400245	-0.863267	-0.676558	-0.637068	-0.960374	-1.03168	0.979911	1
			1170	-0.897725	-0.144923	0.910058	-0.745391	-0.167622	-0.504973	0.192939	-0.960374	-0.684264	0.322175	1
			1175	-0.210726	1.49365	-0.227479	-0.190432	1.41444	0.302307	0.373726	1.48925	1.13467	-1.95034	1
			1176	-0.528745	-0.144923	0.852757	-0.569349	-0.252674	-1.03028	-0.427729	-0.960374	-0.848771	0.358	1
			1177	-0.0108396	-0.144923	0.208615	-0.0522621	-0.252674	-0.83231	-0.199321	-0.960374	-0.684264	0.330383	1
			1179	0.98232	0.0480534	0.125113	0.117417	0.280915	-0.0312702	-0.930186	-0.960374	-0.725808	0.483109	1
			1182	-0.580163	-0.371402	0.63125	-0.709658	-0.217653	-0.661667	-0.000682665	0.914122	-0.775719	0.890457	1
			1184	-0.410707	-0.854212	0.692413	-0.550336	-0.863267	-0.65228	-0.371189	-0.960374	-1.03117	0.743882	1
			1192	-0.665841	-0.919293	0.718449	-0.820404	-0.984428	-0.958187	0.416716	0.579391	-1.19516	1.17125	1
			1193	-0.66063	-0.452868	0.69362	-0.83283	-0.264203	-0.828417	0.984955	0.47674	-0.684264	0.295685	1
			1195	-0.688286	-0.596055	0.914489	-0.676485	-0.824765	-0.872706	-0.582737	-0.960374	-1.01276	0.759584	1
			1199	0.947959	-0.507415	-0.683801	0.438154	-0.382102	-0.260854	-0.336116	-0.459055	-0.570696	0.497808	1
			1200	-0.399435	-0.718199	0.586428	-0.365901	-0.698818	-0.391511	-0.0410215	0.307668	-0.757316	0.954006	1
			1203	-1.03678	-0.307601	1.04835	-0.815511	-0.132818	-1.32389	0.159885	1.73421	-0.757316	0.850777	1
			1205	1.02577	-1.1288	-0.746817	1.47737	-1.26482	-0.993324	3.29076	-0.960374	-0.542383	0.784892	1
			1206	0.323783	-0.596055	-0.156793	0.222989	-0.824765	-0.952642	2.32423	-0.960374	-0.542383	0.519132	1
			1207	0.0208933	-0.450616	0.127246	-0.661232	-0.101712	0.533005	-0.360018	0.0422637	0.536723	-1.02326	1
			1209	1.25769	-0.569515	-1.0961	1.61169	-0.505873	0.733692	-0.34503	-0.0805082	1.13495	0.337331	1
			1210	0.394243	-0.596055	0.0471538	0.280559	-0.824765	-0.597369	-0.930319	-0.960374	-0.154098	0.565436	1
			1212	0.80939	-0.0633134	-0.699874	0.674436	-0.384712	-0.832471	0.523856	-0.960374	-0.213883	0.635186	1
			1214	-0.428344	-0.458763	0.766247	-0.557421	-0.623989	-0.845047	-0.554067	-0.960374	-0.940227	0.649014	1
			1215	-0.373348	-0.458763	0.656691	-0.557421	-0.623989	-0.876062	-0.554067	-0.960374	-0.940227	0.649243	1
			1218	-0.946462	-1.05081	1.02609	-1.06499	-1.12386	0.00119117	0.211209	0.914122	-0.359986	0.999915	1
			1221	0.512825	0.0706208	0.390161	0.469456	-0.0116565	-1.44566	-0.96357	-0.511276	-0.666374	0.0146377	1
			1222	1.14284	0.641993	-1.09187	0.218758	-0.241798	0.664474	0.463128	-0.4346	1.04404	-2.31786	1
			1224	-0.0614567	-0.596055	0.405254	-0.143636	-0.824765	-0.609784	-0.841338	-0.960374	-0.277576	0.650545	1
			1232	-0.409898	-0.495412	0.699865	-0.489576	-0.268119	-0.963267	-0.131508	0.307668	-0.757316	0.329678	1
			1234	-0.840649	-0.991505	1.3906	-0.788538	-1.06404	-1.44332	-1.23554	-0.960374	-0.778837	0.599347	1
			1235	-0.961389	-0.0727104	0.915933	-0.844101	0.170412	0.900386	-0.0203272	1.09265	-0.469331	-0.0291743	1
			1237	0.184707	-0.495412	0.0515133	0.0665226	-0.268119	-1.22521	1.81604	0.579391	-0.542383	0.256655	1
			1238	-0.783756	-0.0848135	0.925386	-0.743884	0.297882	-0.465161	-0.151754	1.30875	-0.542383	0.292159	1
			1239	-1.07378	0.052479	1.15243	-0.922883	0.498657	-1.04722	-0.0139465	1.1953	-0.633839	0.26871	1
			1245	-1.02744	-0.144923	1.17296	-0.83283	-0.252674	-1.05702	-0.151936	-0.960374	-0.848771	0.328376	1
			1246	-0.372231	-1.0898	0.680311	-0.336666	-1.19434	-0.427925	-0.886188	-0.0231257	-0.757316	1.25885	1
			1247	-0.409898	-0.495412	0.699865	-0.489576	-0.268119	-0.631057	-0.131508	0.307668	-0.757316	0.325458	1

## Sheet: Common Compounds
																						Predicted Value for the compounds having only Fraction Unbound data							Predicted Value for the compounds having only clearance data
		Training Set											Test Set
	NAME	log(1+Fu)	LOGPcons	gmin	Eta_B	mindssC	SAacc	ESOL	log(1+clint)			NAME	log(1+Fu)	LOGPcons	gmin	Eta_B	mindssC	SAacc	ESOL	log(1+clint)			RF pred	SVM pred	LDA pred	LR pred				RF pred	SVM pred	LDA pred	LR pred
	1	-0.710507	0.775934	0.640773	0.454716	0.415521	-0.928604	-0.537356	0			2	0.804178	-0.922439	0.861751	-0.948454	0.415521	-0.820794	0.990308	0			0	0	0	0				1	1	1	1
	3	-0.781679	1.01981	0.155219	-0.00926268	-0.313214	-0.358153	-0.889464	0			11	0.784274	-1.24748	0.209044	0.0759915	0.415521	0.339118	1.07829	0			0	0	0	0				1	1	0	1
	8	-0.781679	2.05229	-0.0413723	0.24056	-0.336417	-0.115433	-1.87413	0			16	2.44425	-2.15515	0.57606	-1.07363	0.723017	-0.203176	2.26528	0			0	0	0	0				1	1	1	1
	10	-0.131222	-0.214672	0.253686	-0.432696	0.415521	-0.194205	0.391303	0			24	-0.703454	0.698381	0.287694	-0.154291	0.415521	-1.0617	-0.707831	0			0	0	0	0				0	0	0	0
	12	-0.730764	0.183897	0.190172	-0.00679717	-0.609773	0.196373	-0.2546	0			38	0.754259	-0.558547	0.157769	-0.506443	0.415521	0.166374	0.761356	0			0	0	0	0				0	0	0	1
	13	-0.781679	-0.0864416	0.619	-0.848591	2.53193	-0.545234	0.739697	0			44	1.5016	-0.726543	0.953723	-0.731477	0.415521	-0.26559	0.69887	0			0	0	0	0				1	1	1	1
	14	-0.756383	0.669716	0.0207072	0.0830629	-1.12526	0.383161	-0.629512	0			55	-0.180859	0.770653	-1.91138	0.51841	-0.0732234	-0.176592	-0.919967	0			1	1	0	0				1	1	0	1
	20	2.09949	-0.80167	-2.00948	-0.597783	0.415521	-0.337633	1.21839	0			65	-0.781679	2.6753	0.684783	0.136433	0.415521	-1.0617	-2.60464	0			0	0	0	0				1	1	1	1
	21	1.5933	-0.434117	-0.0669546	-0.450421	0.415521	-1.0617	0.809136	0			78	0.663034	-0.544886	0.436452	-0.236925	0.415521	-0.412135	0.627124	0			0	0	0	0				0	0	0	0
	22	0.656888	-0.0345362	-1.79068	0.156908	0.415521	-0.51865	0.280524	0			87	-0.75097	0.14693	0.0705729	-0.465541	-0.973579	-0.107881	0.125989	0			1	1	1	1				1	0	1	1
	25	0.392599	-1.23298	1.02873	-1.16543	0.415521	-0.658458	1.20012	0			94	-0.606758	-1.21306	1.18128	-0.498386	0.415521	-0.94829	1.67167	0			1	1	0	0				0	0	0	1
	26	-0.709315	0.620704	0.756186	-0.764322	0.415521	-1.0617	-0.369753	0			104	2.44425	-1.99165	0.564746	-1.45668	0.415521	-0.145938	2.42654	0			0	0	0	0				1	1	1	1
	37	-0.724461	0.782929	0.879526	-0.506443	0.415521	-1.0617	-0.225904	0			109	2.44425	0.657937	0.74386	-1.29112	0.415521	-0.545234	0.393991	0			1	0	0	0				0	0	0	0
	39	1.91339	0.0436358	0.739207	-0.866651	1.06033	-0.242611	0.127692	0			117	0.784274	-0.851104	0.90111	-0.907553	1.55282	-0.625842	0.889869	0			0	0	0	0				0	0	0	0
	40	-0.74792	0.551596	0.471751	0.427158	0.246758	-0.0173344	-0.585348	0			132	-0.781679	2.00453	0.811748	-0.215718	0.415521	-1.0617	-1.83134	0			0	1	1	1				0	0	0	0
	42	2.30201	-2.01261	0.953825	-1.45616	0.415521	-0.795505	2.19031	0			140	-0.781679	1.2806	0.217588	0.259139	-0.526374	-0.0230497	-1.42298	0			0	0	0	1				0	0	0	0
	48	-0.716974	0.824104	0.0232994	0.42629	0.415521	-0.0287649	-0.900383	0			155	-0.781679	3.15792	0.514421	0.700645	0.415521	-0.843773	-2.83543	0			0	0	0	0				1	1	0	1
	52	-0.781679	-0.164708	0.205761	-0.289465	0.415521	-0.0496082	0.230353	0			164	0.506902	-0.956659	1.17088	-1.16543	0.415521	-0.655493	0.905845	0			0	0	0	0				1	0	0	0
	53	1.40282	0.424272	1.0312	-0.874708	0.415521	-1.0617	-0.319463	0			170	0.539951	-0.407748	0.923179	-0.608772	0.415521	-0.132491	0.430822	0			1	1	0	1				0	0	0	0
	58	-0.474629	-0.214317	0.719249	-0.948454	0.415521	-0.545234	0.351081	0			182	-0.4568	-0.24133	0.670393	-0.72342	0.415521	-0.545234	0.443986	0			0	0	0	0				0	0	0	0
	60	-0.698788	-0.391146	-0.0164996	-0.465541	-1.23844	-0.107881	0.578836	0			196	2.3331	-2.27979	0.907433	-1.2906	0.415521	-0.586546	2.27802	0			0	1	0	1				1	1	1	1
	61	-0.678624	-0.397306	-0.0212605	-0.465541	-1.25293	-0.107881	0.583482	0			214	1.02273	-1.24037	0.457249	-0.774844	0.202644	-0.321588	1.40238	0			0	0	0	0				1	1	1	1
	66	-0.781679	2.6753	0.733722	0.218237	0.415521	-1.0617	-2.60464	0			222	1.79612	-0.662727	0.159619	0.17487	0.147317	0.632233	0.760346	0			0	1	1	1				1	1	0	1
	67	-0.781679	2.6753	0.73221	0.218237	0.415521	-1.0617	-2.60464	0			227	1.32712	-0.719583	0.788173	-0.557867	1.5393	-0.24187	0.750336	0			1	0	0	0				0	0	0	0
	75	-0.757864	2.42917	0.455349	1.47705	0.415521	-0.0287649	-2.04041	0			237	2.25426	-1.13938	0.169259	0.167798	0.415521	0.705634	1.14998	0			0	0	0	0				0	0	0	0
	80	-0.767737	1.88116	-0.199681	1.15633	-0.372277	0.541687	-3.27187	0			241	-0.397715	-0.198572	0.322573	0.0763218	0.125147	0.228436	0.0163725	0			0	0	0	0				0	1	0	0
	82	-0.722944	0.183211	-0.0709467	-0.248563	-1.40407	-0.107881	-0.0763467	0			248	1.29685	-0.997399	0.208161	-0.23021	0.0926858	0.162792	0.862012	0			0	0	0	0				0	1	0	0
	86	-0.599099	-0.220852	-0.0486635	-0.465541	-1.33628	-0.107881	0.364461	0			254	0.750912	-1.03284	-0.0603271	-0.0460773	-0.783846	0.28692	1.1502	0			0	0	0	0				0	1	1	1
	89	-0.656644	-0.785181	0.0409637	-0.289465	0.415521	0.682843	0.875365	0			263	0.966809	-1.75893	-1.59454	-0.128599	-1.31186	0.508394	1.50236	0			0	0	1	1				1	1	0	0
	90	-0.354971	-0.311486	0.165082	-0.289465	0.415521	0.166374	0.52639	0			267	1.43473	-0.600489	0.216685	-0.275199	-0.0747241	-0.070077	0.551018	0			0	0	0	0				0	1	0	0
	91	-0.155567	0.77974	0.52252	0.679145	0.415521	-0.545234	-0.381856	0			281	-0.739749	-0.904734	-1.74207	0.517616	-1.40605	1.30493	0.442576	0			0	0	1	1				1	1	1	1
	95	-0.500756	0.0450263	0.713019	-0.856648	0.415521	-0.685884	0.122244	0			287	0.726069	1.61265	1.2501	-0.415964	0.415521	-1.0617	-1.50686	0			1	1	0	0				0	0	0	0
	101	0.311987	0.780422	0.500245	1.154	0.415521	-0.50743	-0.459612	0			298	-0.63373	-0.0221939	-2.13885	1.76753	-1.71476	1.61303	-0.513605	0			1	1	1	1				1	1	1	1
	102	-0.691661	0.77974	0.52252	0.638243	0.415521	-0.545234	-0.381856	0			309	1.57707	-0.571761	0.246068	-0.16676	0.415521	0.0719928	0.875366	0			0	0	0	0				1	1	1	1
	105	-0.757679	0.270297	-0.116114	-0.00731598	-1.54146	0.617547	-0.200594	0			317	-0.401145	-0.748458	0.339351	-0.205715	-0.155986	-0.19746	0.648718	0			0	0	0	0				1	1	1	1
	107	0.95785	-1.08876	0.9005	-1.07363	0.415521	-0.530548	1.23508	0			327	2.44425	-2.09191	-1.33693	0.261109	0.415521	0.217471	2.07516	0			0	0	0	0				1	0	1	1
	108	2.03896	-1.35764	0.605429	-1.45668	0.415521	-0.412135	1.92055	0			337	-0.781492	1.08338	-2.27621	2.09992	-0.262884	2.43869	-2.03635	0			1	1	0	0				0	0	0	0
	112	1.10537	-1.0597	0.275362	-0.856648	-0.350634	-0.226294	1.22177	0			344	-0.768805	1.0156	0.602586	-0.65773	0.415521	-0.141989	-0.856402	0			0	0	0	0				0	0	0	0
	114	-0.206289	-0.339504	0.174757	-0.981818	-0.656663	-0.24098	1.04301	0			351	1.14891	0.0012478	0.267516	-0.481654	-0.374502	-0.321588	-0.133493	0			0	0	1	1				1	1	1	0
	115	0.973836	-0.170267	-2.6808	0.38842	0.415521	0.20542	0.455862	0			361	-0.466793	-1.97368	-0.253793	1.78419	-1.74455	2.94793	0.376732	0			0	0	0	0				0	1	0	0
	122	1.72334	-0.784149	1.00334	-0.9813	0.415521	-0.663647	0.979895	0			367	-0.770708	0.896253	0.595281	0.422746	0.622522	1.7788	-0.944639	0			1	1	1	1				0	0	0	0
	126	-0.594448	0.133036	0.706857	-0.948454	0.415521	-0.545234	0.0458368	0			373	0.710559	0.596767	0.486298	-0.338942	0.415521	-0.310066	-0.642657	0			1	1	1	1				1	1	0	0
	128	-0.457364	-0.110259	0.49601	-0.114463	0.415521	-0.412135	0.382537	0			380	-0.744918	0.835433	-1.07349	-0.0346013	0.415521	-0.607342	-0.732378	0			0	0	0	0				1	1	1	1
	134	-0.781679	2.00453	0.846464	-0.133915	0.415521	-1.0617	-1.83134	0			388	2.40875	-1.80628	0.124559	-0.058221	0.415521	1.11171	1.21441	0			0	0	0	0				1	1	1	1
	135	-0.160859	0.0781139	0.982222	-0.215718	0.415521	-0.26559	-0.0429982	0			396	0.908914	-0.639363	-0.121548	-0.506443	-1.55799	-0.0378749	0.639243	0			0	0	0	0				1	1	1	1
	138	-0.781539	0.13495	-0.0319071	0.517018	-1.28531	0.806644	-1.59015	0			405	-0.781679	-1.33991	0.653611	-0.731477	0.799954	-0.51654	1.25675	0			0	0	0	0				0	0	0	0
	141	2.2397	-1.97183	0.159394	-0.183392	-0.582625	1.03548	1.61573	0			410	-0.723404	0.290277	-0.313115	0.508962	-2.14071	0.930772	-0.462613	0			0	0	0	0				0	0	0	0
	143	0.226957	-0.83647	0.69797	-0.72342	0.415521	-0.50743	1.00383	0			415	1.48933	-1.24774	0.121661	0.300041	-0.055408	0.585458	1.0102	0			0	0	0	0				1	1	1	1
	150	-0.748474	0.101815	0.000849398	-0.649673	-1.18567	-0.107881	0.0714337	0			424	2.29096	-1.61538	0.613895	-0.608772	0.415521	0.561656	1.56644	0			1	1	1	0				0	0	0	0
	159	2.36137	-1.22019	0.551302	-0.815746	0.488744	0.0208465	1.40344	0			432	-0.479991	1.13108	1.278	-1.45668	0.415521	-1.0617	0.082305	0			1	1	1	1				1	1	0	0
	161	-0.781679	1.81248	0.435521	0.635443	0.415521	0.000607436	-1.84143	0			437	0.510429	-0.701043	-0.559011	1.68924	-0.682349	1.27723	0.0598244	0			0	0	0	0				1	1	1	1
	162	2.44425	-2.04812	0.986657	-1.12453	0.415521	-0.586798	1.98021	0			451	1.88356	-0.388904	-1.42292	-0.450421	0.415521	-0.699668	0.827624	0			0	0	0	0				1	1	1	1
	165	-0.0789062	0.181539	0.0619286	0.175032	-0.999874	0.791958	-0.103511	0			461	2.32881	-1.88732	0.385263	-0.533078	-0.0163266	0.516259	1.53255	0			0	0	0	0				1	1	1	1
	166	0.297615	-0.238893	0.967057	-0.608772	0.415521	-0.26559	0.311764	0			469	-0.640498	0.410949	-0.114152	0.0421612	-1.53549	0.344701	-0.589586	0			0	0	0	0				0	0	1	1
	169	0.165474	0.215036	0.993049	-0.174816	0.415521	-0.26559	-0.123184	0			481	2.21972	-2.21266	-1.18676	-0.450421	0.415521	-1.0617	2.13113	0			0	0	0	0				1	1	1	1
	171	-0.521042	-0.486325	-1.4444	-0.0278101	0.415521	0.507422	0.304996	0			486	0.442952	0.0810181	0.406565	-0.514499	0.589159	-0.719645	0.00402509	0			0	1	0	0				0	0	0	0
	172	-0.769408	-0.53812	0.0523903	-0.0724875	0.415521	0.682843	0.638907	0			493	-0.0909269	0.12997	0.0193165	0.230787	-0.179449	-0.118483	-0.0531756	0			0	0	0	0				1	1	0	0
	173	1.86515	-1.50013	0.0168408	-0.72342	-1.13703	0.157076	1.50459	0			505	0.304991	0.176786	0.563159	0.226394	0.757216	-0.433703	-0.56332	0			1	1	0	0				1	1	0	1
	183	0.308674	-0.613855	0.922947	-0.940398	0.415521	-0.663647	0.76552	0			510	-0.543982	1.31732	-0.230152	1.15633	-0.424415	0.153015	-2.8381	0			1	1	0	0				0	0	0	0
	185	2.44425	-0.702972	0.535458	-0.121446	0.440547	-0.647001	0.644076	0			517	-0.640498	0.535049	0.509595	0.158919	1.26896	-0.24098	-0.580138	0			0	0	0	0				0	0	1	1
	192	-0.703225	0.577058	0.0179326	0.0421612	-1.1337	0.493419	-0.588425	0			530	-0.744594	0.0152684	0.0773111	-0.089232	-0.953082	-0.107881	-0.0138634	0			0	0	0	0				0	1	1	1
	205	-0.0629266	-0.256498	-2.21126	1.30789	-1.07218	0.959631	-0.0326435	0			540	-0.466793	0.448017	0.122956	0.385737	-0.510847	0.0309328	-0.556644	0			0	0	0	0				0	0	0	0
	206	-0.0813078	-0.641336	-0.0976414	-0.387301	-0.375882	-0.0173344	0.433666	0			556	-0.571926	0.830513	-2.35157	1.70455	0.415521	1.26799	-1.39824	0			1	1	1	1				0	0	0	0
	213	0.590823	-0.968704	0.601556	-0.649673	0.415521	0.343725	0.823075	0			566	-0.781679	1.78681	-2.23043	1.26115	0.415521	0.928248	-1.77541	0			0	0	0	0				0	0	1	1
	215	1.96423	-1.76168	0.684461	-0.690575	0.893798	-0.039506	1.54456	0			575	-0.212874	0.854912	-1.84761	-0.0407164	0.415521	-0.167621	-0.631036	0			0	0	1	0				0	1	1	1
	216	-0.781679	1.7792	1.24979	-0.272733	0.415521	-1.0617	-1.62233	0			582	-0.583062	-1.8617	-0.193356	0.848644	-1.77642	2.84941	1.11854	0			1	1	1	1				1	1	1	1
	219	-0.380605	-0.51785	0.304643	-0.533078	-0.261566	-0.376212	0.441073	0			589	-0.769408	3.12512	-2.51251	2.00767	0.415521	1.14442	-2.9261	0			0	1	0	0				1	1	0	1
	223	-0.575353	0.341585	1.20341	-0.915609	0.415521	-1.0617	-0.0898895	0			598	-0.758466	0.0149692	-1.65714	1.14469	-0.768186	1.05941	-0.590642	0			0	0	0	0				1	1	1	1
	225	2.12748	-1.81906	-1.0744	-0.542303	-0.164509	-0.267097	1.85457	0			602	0.615018	-0.362434	0.509164	0.0669498	0.360566	-0.300092	0.0352203	0			1	1	1	1				1	1	1	1
	226	2.30201	-1.19582	0.464099	-0.682519	0.223483	-0.0230497	1.23081	0			608	-0.732237	0.732527	-0.297299	1.10617	0.761612	-0.928604	-1.14823	0			0	0	0	0				0	1	0	0
	229	0.531536	-0.664596	0.593556	-0.9813	0.617274	-0.757449	0.927838	0			613	1.4434	-0.438283	0.295498	-0.0805441	-0.289382	-0.136677	0.451747	0			0	0	0	0				0	1	1	1
	232	-0.730303	1.06925	-1.98336	0.960421	-2.17103	1.04921	-1.14095	0			620	-0.0669164	-0.323618	-2.17823	1.154	-1.13783	1.13404	0.186052	0			0	0	0	0				0	0	0	0
	234	-0.102979	-2.04161	-0.701766	1.98429	-1.20515	3.23076	0.561832	0			626	1.24836	-0.86297	-0.0713734	0.568086	-1.40536	0.687415	0.663998	0			1	1	1	1				0	0	0	0
	238	1.04573	-1.12448	0.224121	-0.487266	-0.506502	-0.169033	1.37095	0			630	1.56556	-0.872876	0.139141	-0.391794	0.886614	0.212798	0.739828	0			1	1	1	1				0	1	0	0
	239	2.32165	-1.82809	-1.26522	0.267425	-0.82721	0.367154	1.76688	0			642	2.44425	-2.1647	0.360859	-1.07363	-0.0905632	0.0586778	2.00577	0			0	0	0	0				1	1	1	1
	240	-0.719729	1.34411	-0.22173	0.930092	0.960894	-1.0617	-1.50677	0			652	-0.744594	0.251075	0.0342651	-0.25662	-1.08402	0.063274	-0.10752	0			1	1	1	1				1	1	0	1
	242	0.404156	0.571544	0.313275	0.706873	0.121237	-0.320096	-0.240087	0			657	-0.781679	1.36869	0.177445	-0.381791	-0.609432	0.925057	-0.569724	0			0	0	0	0				0	0	1	1
	243	-0.718351	-3.73808	-2.0608	4.03154	0.415521	1.64636	1.98746	0			662	-0.781679	0.482869	-0.0321229	0.733996	-1.28597	0.806644	-2.37671	0			0	0	0	0				1	1	0	0
	245	0.510429	0.731139	0.800037	-0.19093	1.9727	-0.455353	-0.947881	0			673	-0.295984	0.972699	0.671308	-0.504202	0.415521	-0.843773	-0.732877	0			1	0	0	0				1	1	1	1
	249	1.82279	-1.56926	-0.187262	0.848644	-1.75788	2.92839	0.868148	0			680	0.631536	-1.12036	-1.50067	0.878618	-1.1734	1.00128	0.669413	0			0	0	1	1				0	0	0	0
	250	-0.781679	2.28833	0.535649	0.191083	0.441128	-0.471507	-2.75923	0			684	0.770958	-1.9283	-0.974314	-0.745146	0.415521	-0.391224	2.04379	0			1	1	1	1				1	0	0	0
	253	-0.764815	0.389735	-4.13407	4.54577	-7.1404	2.27995	-0.64477	0			688	0.330714	-0.781576	-0.223347	-0.0276111	-0.758022	0.106793	0.738819	0			1	1	0	0				1	1	1	1
	255	2.08142	-1.68627	-0.0522669	1.0734	-1.34724	1.53779	0.992012	0			704	2.08142	-0.455767	0.428961	-0.823802	0.177	-0.40642	0.589517	0			0	0	0	0				1	1	1	1
	256	0.539251	-0.687977	0.673187	-0.940398	0.415521	-0.663647	0.9703	0			709	1.03881	-1.02471	0.345569	0.0616125	-0.0527923	0.0786918	1.05417	0			0	0	0	0				1	1	1	1
	261	-0.781679	1.9274	0.657468	1.00729	2.58285	-0.757701	-1.91713	0			713	-0.554607	0.326519	0.798219	-0.407907	0.415521	-0.986094	-0.479071	0			0	0	0	0				1	1	1	1
	264	2.30249	-1.42129	0.226429	-0.16676	-0.181012	0.508106	1.46941	0			719	1.87568	-0.888901	0.496722	-0.649673	0.322717	-0.368616	0.772342	0			1	0	0	0				0	0	1	0
	265	-0.689516	1.56969	-0.12008	1.23364	-1.48867	1.49516	-1.80314	0			724	0.0862035	-0.544773	0.341775	-0.557867	-0.148614	-0.334334	0.574367	0			0	0	0	0				1	1	1	1
	266	-0.238893	-0.375914	0.633422	-0.516965	0.415521	-0.0165269	0.58294	0			730	2.27844	-1.06339	0.70282	-0.525021	1.51644	0.116572	0.936393	0			0	0	1	0				0	0	0	0
	270	0.510429	-0.897207	0.241934	-0.223775	0.415521	0.364756	0.562932	0			747	-0.180041	-0.620145	0.898246	-0.874708	0.415521	-0.234457	0.533479	0			0	0	0	0				1	1	1	1
	274	-0.781679	1.98026	1.02214	0.0392769	2.39284	-0.986094	-1.97018	0			756	1.38825	-1.60709	0.0107973	-0.9813	-1.15541	-0.0378749	1.62622	0			0	0	0	0				1	1	1	1
	276	-0.510493	-0.627237	-1.5097	-0.0548516	-0.749784	0.670308	0.378675	0			765	2.17604	-1.80324	0.687203	-0.9813	0.90214	-0.719645	1.98596	0			0	0	0	1				1	0	0	0
	283	-0.682814	-1.0198	-1.53044	0.131746	-0.388791	-0.0043864	0.769062	0			774	-0.781679	1.47755	-2.60358	1.92983	-1.99063	1.697	-1.82643	0			0	0	0	0				0	0	1	0
	285	0.979577	-0.61937	1.62419	-1.45616	0.415521	-1.0617	0.910036	0			784	-0.679034	1.34799	0.523571	1.01296	0.415521	-0.141989	-1.22433	0			0	0	0	0				1	1	1	1
	286	-0.732651	1.59181	1.25287	-0.456865	0.415521	-1.0617	-1.49115	0			792	-0.764769	1.22725	0.194408	0.960421	-0.596887	-0.253307	-1.12926	0			0	1	1	1				0	0	0	0
	295	-0.777027	1.14375	0.768545	-0.358949	0.415521	-0.852996	-0.781758	0			796	-0.599144	-0.052915	-0.259236	-0.182873	-0.51214	0.180055	-0.21674	0			0	0	0	0				1	1	1	1
	296	-0.605861	0.401	-0.0911658	0.230557	-0.416458	0.0804956	-0.649235	0			800	0.778287	-3.10354	-1.13103	2.32861	-1.90562	3.38573	1.53627	0			1	1	1	1				0	0	0	0
	297	0.784274	-0.363158	0.259543	-0.350892	0.415521	-0.061106	0.720512	0			805	0.979577	-0.0614854	-1.47468	-0.251579	0.415521	0.048776	0.331657	0			0	1	1	1				1	1	1	1
	300	-0.781679	2.10572	-1.99987	1.31635	-1.5815	-0.0812975	-2.01672	0			811	-0.734955	-0.0131688	-2.29298	1.45486	0.415521	1.5852	-0.618186	0			0	0	0	0				1	1	0	1
	303	2.38029	-0.806103	-1.01113	-0.0447359	0.415521	-0.649014	1.1733	0			818	-0.774052	0.459483	-3.90596	2.72378	-6.50791	2.11225	-0.485236	0			0	0	0	0				1	1	1	1
	304	-0.638421	2.66133	0.495275	-0.609809	0.318317	-0.186997	-1.15777	0			823	-0.764815	0.910163	-4.35042	4.40821	0.415521	3.02485	-1.25776	0			0	0	0	0				0	1	1	1
	313	-0.732605	-0.208205	-0.335952	0.262364	-2.21018	1.1757	-0.133673	0			828	-0.719269	0.821227	0.290978	0.283927	1.34249	0.174993	-1.10994	0			0	0	0	0				0	0	0	0
	314	-0.0509779	-1.46731	-0.402432	0.300041	-0.474084	0.388876	1.0472	0			833	0.245656	-1.3025	-0.221938	-0.295494	-1.0675	0.289973	1.09659	0			0	1	0	0				0	0	0	0
	316	-0.689516	0.573152	-1.74322	1.31163	0.415521	1.40117	-1.10693	0			838	-0.739149	0.66951	-0.0171056	0.0341046	-1.24029	0.791958	-0.733417	0			0	0	0	0				1	1	1	1
	320	2.05113	-0.451539	-1.76952	-0.450421	0.415521	-0.51865	0.756971	0			845	0.181772	-0.654263	-0.191242	-0.113389	-1.76999	0.360182	0.465019	0			1	1	1	1				1	1	1	1
	321	1.10568	-0.0593659	0.590204	-0.598768	0.415521	-0.169415	-0.225889	0			854	-0.692575	-0.678285	-3.5489	1.97889	0.415521	1.39508	0.506096	0			0	0	0	0				0	0	0	0
	326	-0.554607	-0.501641	0.530936	0.0174726	0.523079	0.0664279	0.161157	0			858	1.10537	-0.435361	-0.0734309	0.899549	-1.41162	1.74578	0.355944	0			0	0	0	0				0	0	0	0
	330	1.40573	-1.20272	-0.0495861	-0.396282	-0.780831	0.28692	1.3374	0			862	1.04856	-0.953582	-0.362721	1.18571	-0.535294	0.883997	0.393619	0			0	0	0	1				1	1	1	1
	335	0.0579232	-0.37919	0.955955	-0.649673	0.415521	-0.26559	0.390958	0			867	-0.781679	0.712018	-2.23884	0.837197	0.415521	1.14529	-0.545395	0			0	0	0	0				0	1	1	1
	336	0.200653	0.1742	0.800308	-0.141971	1.24619	0.117641	-0.305825	0			885	-0.477418	0.523806	0.141923	0.153663	-0.0829163	-0.539519	-0.391635	0			0	0	0	0				0	0	0	0
	339	0.0707288	-0.505714	0.86427	-0.400369	0.415521	0.000607436	0.425581	0			896	-0.628773	-0.107954	-0.220345	-0.14249	-1.85852	0.237092	-0.0511474	0			0	0	0	0				1	1	1	1
	340	-0.774935	1.60096	0.209027	0.0744875	0.415521	0.369203	-1.44985	0			902	-0.781679	1.3412	0.352911	-0.141971	0.415521	-0.544481	-1.34249	0			0	0	0	0				1	1	1	1
	341	-0.781679	1.46116	0.604533	-0.182873	0.415521	-0.141989	-1.28881	0			912	0.403435	0.419952	-0.551884	4.09459	-0.765827	2.91388	-2.51597	0			0	0	0	0				1	1	1	1
	346	2.44425	-1.71133	0.329778	-0.121446	-0.185106	-0.174481	1.41936	0			921	-0.653157	-0.00959739	-0.185264	2.15576	-0.866475	1.96454	-0.950758	0			0	0	0	0				0	1	1	1
	348	1.85195	-1.47559	0.650384	-1.19828	0.79014	-0.539519	1.67977	0			926	-0.571926	-0.40701	0.70079	-0.701616	0.415521	0.116572	0.720786	0			0	0	0	0				1	1	1	1
	350	0.0161582	-0.124607	-0.0432854	0.93823	-0.340009	0.595321	-0.282314	0			935	1.6824	-1.25312	-1.4908	-0.302209	-0.711273	-0.022761	1.08562	0			1	1	1	1				0	0	0	0
	354	0.854549	-0.610721	0.261475	-0.0713711	-0.392875	-0.273321	0.610824	0			940	-0.0311312	-1.02498	-1.49894	0.295353	0.415521	0.477252	0.683383	0			1	1	0	1				0	0	0	0
	355	1.43618	-0.0613861	-0.356429	-0.450421	0.415521	-1.0617	0.442079	0			945	-0.738043	-0.641073	-1.98967	0.352337	-0.533536	0.901369	0.354197	0			0	0	0	0				1	1	1	1
	358	0.950799	-0.995407	-1.35195	0.669697	-0.696433	0.777956	0.795877	0			951	-0.735369	0.423877	-0.84959	2.85574	-1.53529	2.40802	-2.1709	0			0	1	0	0				0	0	0	0
	362	-0.735369	0.662687	-0.108201	1.07563	-1.46599	1.30918	-0.71843	0			955	-0.48418	0.503196	0.0551124	0.452207	0.415521	-0.140506	-0.353571	0			0	0	0	0				1	1	1	1
	363	-0.735369	0.162217	0.0211507	-0.141971	-1.12392	-0.0322727	-0.27584	0			963	-0.372499	-0.340162	-2.0214	1.60428	-1.09559	1.0634	-0.193389	0			1	1	1	1				1	1	1	1
	364	0.580416	-1.06949	-0.199955	0.0930662	-0.846066	1.10746	0.758808	0			968	1.82279	-1.02173	0.114462	0.301026	0.415521	0.705634	1.04415	0			0	0	0	0				1	1	1	1
	368	0.874155	-0.994357	0.300154	-0.514499	-0.275221	-0.121448	0.821605	0			975	-0.667485	0.841403	-1.96404	0.471429	0.415521	0.200194	-0.867059	0			0	0	0	0				1	1	1	1
	371	1.33953	0.0482078	0.793217	-0.691094	0.415521	-0.795505	0.139774	0			985	0.387895	-0.488286	0.796626	-0.741999	1.7324	-0.24187	0.385977	0			0	0	0	0				0	0	0	1
	372	-0.781679	1.11538	-0.187171	0.202124	-0.286609	-0.148941	-1.27642	0			991	-0.681766	1.47621	0.924712	-0.242353	0.415521	-0.986094	-1.48018	0			0	0	0	0				1	1	1	1
	374	-0.781679	1.63363	0.889321	-0.20197	1.51696	-0.662407	-1.55246	0			996	-0.423499	0.0605084	0.492379	-0.109126	0.309508	-0.406092	-0.279962	0			0	0	0	1				0	0	0	0
	375	1.68788	0.431434	0.702879	-0.432696	0.415521	-0.820794	-0.259775	0			1002	1.78219	-1.46517	-0.696988	1.68924	-1.09945	1.7937	0.627852	0			1	1	1	1				0	1	1	1
	377	-0.673574	1.02306	0.964663	-0.182873	0.415521	-0.986094	-0.945426	0			1011	-0.678715	-0.179812	-0.0928859	-0.248563	-1.4708	0.0952239	0.193283	0			0	0	0	0				1	0	0	0
	384	1.9019	-1.52877	0.803526	-0.908072	1.25598	0.156187	1.54508	0			1025	-0.333873	0.781791	-0.995584	-0.590143	0.415521	-0.816518	-0.751919	0			0	0	0	0				0	1	1	0
	386	1.68788	-0.903908	-0.172136	0.243026	-1.71187	0.53783	0.472498	0			1031	-0.182904	0.534396	0.0170236	0.405633	2.14622	-0.140506	-0.623224	0			0	0	0	0				1	1	1	1
	387	-0.490777	0.345766	0.18314	0.185686	-0.027836	-0.0231887	-0.688438	0			1040	1.13537	0.533842	0.219625	-0.109645	0.415521	-0.0602145	-0.561375	0			1	1	1	1				1	1	0	1
	391	-0.781679	0.976466	0.736162	-0.440752	0.415521	-0.255212	-1.07359	0			1045	-0.423499	0.304982	0.566166	0.291984	0.533959	-0.51654	-0.447649	0			0	1	0	0				1	1	1	1
	393	-0.037473	-0.181954	0.291764	-0.0443295	0.426983	-0.552264	0.209798	0			5	-0.338102	1.12112	0.20932	0.350202	0.415521	-0.115685	-0.903037	1			1	1	1	1				0	0	0	0
	394	-0.594671	1.14149	0.974515	-0.182873	0.415521	-0.986094	-1.01081	0			15	-0.707162	1.42295	0.485793	0.117855	0.289473	-0.51654	-1.40877	1			0	0	1	0				0	0	0	0
	397	0.99231	-0.639363	-0.121548	-0.506443	-1.55799	-0.0378749	0.639243	0			23	0.876436	-0.721902	0.588172	-1.01414	0.600899	-1.0617	1.1797	1			0	1	1	1				1	1	1	1
	398	-0.781679	0.671391	0.688855	-0.649673	0.415521	-0.545234	-0.460683	0			30	1.45406	-0.830469	0.832787	-1.45668	0.415521	-1.0617	1.25308	1			0	0	0	0				0	0	0	0
	403	1.43473	-0.640915	0.345116	0.315735	-0.0139469	0.29713	0.139464	0			34	-0.781679	0.213233	0.831346	-1.12453	0.415521	-0.795505	0.12754	1			0	0	0	0				1	1	1	1
	407	0.0365021	-0.61681	0.361519	-0.907553	-0.0885549	-0.62435	0.74511	0			43	-0.592749	0.698124	1.19009	-1.45616	0.415521	-1.0617	-0.166505	1			0	0	0	0				1	1	1	1
	408	-0.423672	0.752594	-2.0601	0.27439	0.415521	0.183408	-0.825757	0			49	-0.781679	0.518188	0.478814	0.158919	0.415521	-0.0287649	-0.575926	1			1	1	1	1				0	1	1	1
	409	-0.151501	-0.905267	-1.69483	0.555067	-0.981558	1.11752	0.302585	0			56	0.439373	-0.372309	1.25219	-1.19828	0.415521	-1.0617	0.703421	1			0	0	0	0				1	1	0	0
	411	-0.592883	0.0986417	-0.111651	0.62361	-1.52788	1.19772	-0.531151	0			63	-0.736245	0.861007	1.02151	-1.12505	1.92528	-0.757449	-0.127548	1			0	0	0	0				1	1	1	1
	413	0.494536	-0.562087	0.112698	-0.15564	0.415521	0.359292	0.632599	0			70	-0.75393	1.8463	0.238822	0.8401	0.415521	-0.0287649	-1.90529	1			0	0	0	0				1	1	1	1
	414	2.40687	-0.20693	-0.17199	0.0790935	-1.41496	0.281204	0.160002	0			74	-0.781679	2.03331	0.456534	1.6617	0.415521	-0.0287649	-1.7737	1			0	0	0	0				1	1	1	1
	417	1.88093	-0.847622	-1.03165	-0.79172	0.415521	-0.571351	0.793811	0			81	-0.756985	0.338567	0.494762	-0.506443	0.415521	-0.545234	-0.206223	1			1	0	1	0				0	0	0	0
	421	-0.301857	0.194536	0.00892675	-0.0500019	0.415521	-0.140506	-0.130483	0			88	-0.729383	-0.151415	0.381528	-0.473598	-0.0276889	0.275489	0.192249	1			1	1	1	1				0	0	1	1
	423	-0.517523	0.621431	-0.0384129	1.66542	-0.225251	-0.0158423	-0.970465	0			97	-0.769222	1.68211	0.756504	-0.774844	0.415521	-0.8908	-0.636181	1			1	1	1	1				0	0	0	0
	427	2.30009	-2.11867	0.00104972	-0.498386	-1.18506	0.316043	2.24752	0			103	-0.587523	0.0205138	0.669953	-0.649673	0.415521	-0.0287649	0.107862	1			0	0	0	0				0	0	1	0
	428	0.421439	-0.745732	-1.38346	-0.0278101	0.415521	0.270597	0.508898	0			113	1.42315	-1.5931	0.315508	-0.856648	-0.228516	-0.107881	1.72502	1			0	1	0	0				1	0	0	0
	429	-0.750231	0.787411	0.357198	1.44473	-0.101698	0.360182	-0.810836	0			120	0.798547	-0.845937	0.909388	-0.815746	0.415521	-0.530548	1.01097	1			0	0	0	0				0	0	0	0
	433	0.635314	-0.19881	0.59513	-0.691094	0.622063	-0.719645	0.48201	0			125	0.423954	-1.07735	0.562541	-1.2906	0.415521	-0.412135	1.32172	1			1	1	1	1				0	0	0	1
	434	0.97575	-1.13435	0.584846	-0.774844	0.415521	0.163599	1.16009	0			131	-0.781679	-0.190255	0.129321	0.476116	-0.794873	0.144598	-0.140616	1			0	0	0	0				0	0	0	0
	435	1.06799	-0.220534	0.576508	-0.0158914	0.565416	-0.539519	0.194563	0			139	-0.544866	-0.20074	0.839558	-0.682519	0.415521	-0.663647	0.331563	1			0	0	0	0				1	1	1	1
	441	-0.781679	2.32122	0.283728	-0.400888	-0.325186	-0.186997	-1.28741	0			146	1.73961	-0.588805	0.315254	-1.1988	-0.229288	-0.40642	0.654747	1			1	1	1	1				0	0	0	0
	443	-0.721566	0.267913	0.511743	-0.223775	0.368409	-0.51654	-0.45042	0			151	-0.270894	-0.0394187	0.595105	-0.239115	0.415521	-0.545234	0.362584	1			1	1	1	1				1	1	1	1
	450	-0.0105801	-0.12479	-0.110452	-0.422692	-1.52424	-0.107881	0.221835	0			156	-0.694995	0.875438	0.166255	-0.349058	0.415521	-0.281157	-0.806497	1			0	0	0	0				1	1	1	1
	454	-0.742148	0.00675705	-0.0461242	-0.248563	-1.32856	-0.107881	0.142674	0			163	-0.716515	0.795573	0.26556	0.183495	0.415521	0.487704	-0.848664	1			0	0	0	0				0	1	1	1
	458	-0.751618	0.277156	-1.79418	0.628926	0.415521	0.594934	-0.688225	0			175	-0.518403	0.0821339	0.68142	-0.866651	0.415521	-0.327304	0.109067	1			0	0	1	1				1	1	1	1
	460	2.07059	-1.50536	-1.42686	-0.0674465	-0.0382615	-0.223204	1.53083	0			179	0.693641	-0.996377	0.817975	-0.72342	0.415521	-0.26559	1.01341	1			0	0	0	0				1	1	0	0
	463	-0.738227	0.793949	-0.226758	1.13901	0.951316	-0.928604	-1.15919	0			186	1.05859	-0.85793	0.91025	-1.03272	0.415521	-0.530548	1.09019	1			0	0	0	0				1	1	1	0
	465	2.36871	-2.78652	0.908118	-1.45668	0.415521	-0.0476598	2.99122	0			190	2.44425	-1.00919	0.291715	0.352093	0.415521	-0.156727	1.07916	1			0	0	1	0				1	1	1	1
	468	2.08469	0.6316	1.19858	-0.481654	0.415521	-1.0617	-0.585536	0			195	-0.694995	0.462312	0.570702	-0.690575	0.547757	-0.757449	-0.208551	1			0	0	0	0				1	1	1	1
	470	-0.774238	0.317673	-0.198046	0.0012594	-1.79069	0.637524	-0.290407	0			200	0.315665	-0.381299	0.306011	-0.72342	0.415521	-0.447665	0.660739	1			0	0	0	0				1	1	1	1
	471	1.68788	-0.747943	-0.0280957	3.62415	-0.144543	3.27306	-1.18987	0			204	-0.111031	-0.169122	0.653304	-0.239115	0.415521	-0.663647	0.464536	1			0	0	0	1				1	1	1	1
	476	2.36185	-1.69092	-0.711802	-0.634629	0.281623	-0.372015	1.70417	0			210	-0.471145	0.291485	0.526498	-1.03272	0.413293	-0.62435	0.468567	1			0	0	0	0				1	1	1	1
	482	-0.691935	0.710878	0.126508	0.485564	1.41845	-0.140506	-0.727989	0			218	-0.260896	-0.644856	0.658307	-0.948454	0.415521	-0.342129	0.671633	1			1	1	1	1				1	1	1	1
	483	-0.674484	2.63848	0.283804	-0.731996	-0.324953	-0.186997	-1.38634	0			230	-0.738043	0.180365	-0.619693	0.0186879	-1.16633	0.687708	0.545793	1			0	0	1	1				0	1	1	1
	484	-0.779678	0.177208	0.0746341	0.0521644	0.415521	0.682843	0.0830628	0			236	-0.199713	0.249217	0.455683	-0.699669	0.197881	-0.586546	-0.0202095	1			0	0	0	0				0	0	0	0
	487	0.14378	0.291076	0.536042	-0.690575	0.415521	-0.8908	-0.00192919	0			251	-0.781679	1.40664	1.06675	0.0830629	0.415521	-0.617688	-1.12052	1			0	0	0	0				1	1	1	1
	488	0.82762	0.291076	0.536042	-0.690575	0.415521	-0.8908	-0.00192919	0			259	-0.781213	-0.458697	0.302164	0.0750064	-0.269106	0.925057	0.158697	1			0	1	1	1				1	1	0	0
	492	2.36682	-0.787199	1.11263	-0.915609	0.415521	-1.0617	0.628511	0			269	1.26697	-0.68846	-1.26529	-0.00175611	-0.610206	0.029248	0.460611	1			0	1	1	1				0	0	1	1
	499	1.01135	-0.624101	-1.27499	1.18224	0.415521	0.578576	0.314172	0			275	-0.689516	1.89858	0.663405	0.398576	0.415521	0.142138	-2.04198	1			1	1	0	0				0	0	0	0
	502	-0.756013	1.40918	0.405166	-0.101069	0.415521	-0.725499	-1.3979	0			280	-0.781679	-0.312118	0.15798	-0.441271	-0.707698	0.31887	0.290727	1			0	0	0	0				1	1	1	1
	504	-0.77526	0.795272	-0.474727	3.35527	-0.544814	1.82441	-2.65639	0			289	-0.486713	0.234547	0.568468	-0.948454	0.54096	-0.757449	0.00678822	1			0	0	0	0				1	1	0	1
	506	-0.295984	0.0640451	-0.493343	0.938148	0.59065	-0.58681	-0.718242	0			293	-0.781679	0.120233	0.241287	-0.690575	-0.454287	-0.107881	0.0806256	1			0	1	0	0				0	1	1	1
	507	2.12399	-1.96731	-0.0519222	-0.297522	-1.34619	0.712842	1.88362	0			302	-0.709774	0.415172	1.2271	-1.16543	0.415521	-1.0617	-0.120478	1			0	0	0	1				1	0	0	1
	508	-0.751895	0.793949	-0.226758	1.13901	0.951316	-0.928604	-1.15919	0			308	-0.781679	0.059778	0.366461	-0.0930129	-0.0735221	0.579743	-0.0206377	1			0	0	0	0				1	1	1	1
	512	-0.521483	0.628147	0.18791	-0.0721937	0.415521	-0.342859	-0.738931	0			315	-0.635038	1.09388	0.361932	-0.182873	-0.0872982	-0.336414	-1.22877	1			0	0	0	0				0	0	0	0
	515	1.30369	-1.15162	-0.566658	4.00125	-0.854917	2.96555	-0.687518	0			323	-0.528089	0.598127	0.552271	-0.348946	0.698537	-0.501714	-0.349084	1			0	0	0	0				1	1	0	1
	516	-0.781679	2.05229	-0.0413723	0.24056	-0.336417	-0.115433	-1.87413	0			329	0.169269	0.344499	0.351505	0.19484	0.757472	-0.719645	-0.0142691	1			0	0	0	0				1	1	0	1
	518	-0.781679	0.984375	-2.17737	1.01133	1.33522	0.747231	-0.752191	0			334	-0.592124	-0.253016	0.343617	-0.815746	-0.14301	-0.107881	0.650822	1			0	1	1	1				1	1	1	1
	519	-0.709361	-1.00204	-1.87639	0.452332	-1.49176	1.59287	0.515922	0			345	-0.781679	0.729242	-1.63443	0.287297	0.415521	0.504954	-0.829059	1			1	1	1	1				0	0	1	1
	527	1.85618	-0.841585	0.554845	-0.597783	0.415521	-0.928604	1.38817	0			353	1.06548	-1.00893	0.232198	-0.741999	-0.481934	-0.203315	0.965025	1			1	1	1	1				1	0	0	0
	535	-0.640046	0.0301197	0.537238	-0.0148537	0.775387	-0.554344	-0.247151	0			360	-0.689516	0.175877	0.182767	-0.242353	0.415521	0.0719928	-0.271153	1			1	1	0	0				1	1	0	0
	536	2.05619	-2.24257	-1.62076	0.341927	0.35455	1.63717	1.73703	0			370	1.30933	-0.694911	0.115872	-1.01414	0.415521	-1.0617	1.0649	1			0	0	0	0				1	1	1	1
	538	-0.711928	0.32829	-2.23867	3.09141	1.06485	1.97545	-1.6998	0			381	-0.781679	0.394125	-1.05254	-0.0346013	0.415521	-0.607342	-0.433054	1			1	1	1	1				1	1	0	0
	542	-0.61389	0.616773	-0.270353	-0.115286	0.415521	-0.139024	-0.828017	0			389	0.105475	0.0891281	0.382019	-0.00679717	-0.0261956	-0.377587	-0.375186	1			0	1	0	0				0	0	0	0
	554	1.29982	-0.904408	0.466898	-0.72342	0.231996	-0.501714	0.968415	0			399	1.12364	-1.16406	0.099811	-0.516965	0.561541	0.392924	1.1303	1			1	0	0	0				1	1	0	0
	555	-0.359305	0.428553	0.435473	1.49231	0.525751	-0.0173344	-0.708348	0			404	-0.184132	-0.349567	0.291204	0.850397	0.325178	0.579743	-0.0115819	1			1	1	1	1				1	1	1	1
	557	-0.707803	0.0301197	0.537238	-0.0148537	0.775387	-0.554344	-0.247151	0			418	-0.781679	-0.0186913	-0.355787	6.5385	-1.04926	3.93791	-2.95443	1			0	0	0	0				0	0	0	1
	561	1.71763	-0.791112	-0.40258	0.0152822	0.415521	0.626257	0.503715	0			425	2.35023	-3.12529	-0.191239	-0.131968	-0.743344	1.56402	2.51669	1			0	0	0	0				1	1	1	1
	565	1.34719	-0.593291	0.231489	0.117855	-0.48409	0.101831	0.288476	0			436	-0.0113689	0.512186	1.10663	-0.790957	0.415521	-0.805968	-0.346909	1			0	0	0	0				0	1	0	1
	567	-0.70199	-0.481728	-1.85651	0.504274	0.415521	0.642853	0.062283	0			442	2.35521	-0.118884	0.207819	-0.731996	-0.556091	-0.186997	0.566974	1			0	0	0	0				1	1	1	1
	569	0.256839	0.0445523	0.233383	0.21018	-0.0379738	0.278516	-0.310738	0			447	-0.653157	0.595678	0.268984	-0.731996	-0.370035	-0.186997	0.0422838	1			1	1	1	0				1	1	0	0
	573	-0.127177	0.30488	-0.113753	0.370224	-0.286524	0.541687	-0.781316	0			453	-0.760782	0.815031	0.607865	-0.174816	0.415521	-0.0287649	-0.755836	1			0	0	0	0				1	1	1	1
	576	-0.599144	0.656369	-1.85899	0.499831	0.415521	0.111231	-0.981659	0			459	-0.781679	1.66157	-0.549779	0.579518	0.415521	-0.545234	-1.79229	1			0	0	0	0				1	1	1	1
	577	-0.372329	-0.80471	-0.157455	-0.0724875	-1.66721	0.674298	0.678373	0			467	-0.728463	1.02056	-0.03485	0.291871	0.415521	-0.257679	-1.25712	1			0	0	0	0				1	0	0	0
	579	-0.648948	0.820843	-0.693092	-0.00910014	0.415521	-0.29494	-0.83297	0			475	0.188578	-0.275689	0.481939	-0.298041	0.277748	-0.586546	0.29077	1			0	0	0	0				1	1	1	1
	583	-0.703225	0.456986	-2.00598	1.72699	-1.71917	1.26743	-0.914309	0			480	2.44402	-1.72413	0.309058	-0.940917	-0.248135	-0.186997	2.07923	1			1	1	1	0				1	1	1	1
	584	-0.489029	-1.61282	-1.96534	0.927189	-1.58918	1.73182	0.740667	0			494	-0.781679	-0.058573	-0.582263	-0.892508	0.415521	-0.894199	0.563577	1			1	1	0	1				0	0	0	0
	587	0.979258	-0.352131	-1.12706	-0.316863	0.218689	-0.428512	0.536817	0			498	-0.615282	0.300148	1.14265	-0.597783	0.415521	-1.0617	0.626846	1			1	1	0	1				0	0	0	0
	590	1.46699	-1.35175	1.41851	-1.45616	0.415521	-0.946664	1.50468	0			509	-0.725703	0.0550789	0.407453	-0.101069	0.104233	0.408588	-0.121821	1			1	1	0	0				1	1	1	1
	591	-0.726163	-0.992191	-1.72482	0.485564	-1.76498	1.0068	0.60764	0			520	2.2876	-1.90103	0.66435	-1.45668	0.415521	-0.545234	2.28317	1			0	0	0	0				0	0	1	0
	597	0.219457	-1.1354	-0.170373	1.52429	-1.22531	1.22931	0.511357	0			524	-0.732191	0.234805	0.544759	-0.0713711	2.59419	-0.710674	-0.0102977	1			1	1	0	1
	599	-0.689516	-0.875758	-1.63792	0.586078	-0.74635	1.12356	0.213811	0			529	-0.314048	-0.759896	0.327899	-0.815746	-0.190822	-0.107881	0.991518	1			1	1	0	0
	600	-0.684956	0.355727	-1.64857	0.71073	-0.75834	0.850452	-0.842492	0			534	-0.781679	-1.30807	0.0564898	0.394313	-0.969567	2.34137	0.835884	1			1	1	0	1
	601	1.16089	-2.851	0.837019	-0.431711	0.415521	-0.928604	2.84472	0			543	-0.522847	0.850552	0.340019	0.117611	0.362775	-0.0230497	-0.816012	1			0	1	1	1
	603	-0.0176837	0.789942	0.088132	0.273162	0.484541	-0.0221582	-0.83941	0			547	-0.756753	0.899871	0.150663	0.0644843	-0.267348	-0.0400085	-0.830381	1			0	0	0	0
	604	-0.737858	-1.3698	-1.98014	0.886287	-1.61832	1.50655	0.630083	0			551	-0.760412	1.07357	0.00618776	0.737016	-0.116005	-0.115433	-0.942	1			0	1	1	0
	607	-0.584266	1.28148	-0.285415	0.897247	0.757596	-1.0617	-1.4949	0			559	-0.781679	1.19463	-1.91105	0.475042	-0.329499	0.388005	-0.961045	1			0	1	1	1
	609	-0.781679	0.636994	-0.281733	0.033617	0.481175	-1.0617	-0.585448	0			564	1.87305	0.450222	-2.09231	1.04417	-1.62842	0.775017	-0.656551	1			0	0	0	0
	610	-0.781679	2.15678	0.388908	0.61129	0.415521	-0.0287649	-2.31133	0			572	-0.709315	0.484182	1.13249	-0.915609	0.415521	-1.0617	-0.272379	1			0	0	0	0
	612	2.35046	-2.60907	0.406949	-0.940917	0.0496396	0.772848	2.62844	0			581	-0.694904	0.977583	-1.98851	0.526466	-0.952231	0.136633	-0.916328	1			0	0	0	0
	614	1.19753	-1.07776	-0.133838	0.0279447	-0.659854	0.106793	0.9315	0			592	-0.663127	-0.967798	0.170233	-0.381791	-0.669794	0.925057	1.05185	1			0	0	0	0
	617	-0.781679	2.21867	-1.89986	1.83695	1.03983	0.863508	-2.38424	0			596	0.0357212	0.205614	0.404508	-0.498386	0.0422119	-0.62435	0.482764	1			0	0	0	0
	618	0.345349	-2.04686	-1.70459	0.656953	0.415521	0.805729	1.30774	0			615	-0.781679	0.340283	0.280719	-0.856648	-0.334339	-0.107881	0.240097	1			0	0	0	0
	623	0.506902	-0.35214	-0.0340967	0.902015	-1.29197	0.927516	-0.145696	0			622	0.382462	-0.717037	0.409155	-0.691094	0.0563494	-0.070077	0.969355	1			1	1	0	1
	624	-0.646099	0.424889	0.434277	-0.525021	0.415521	-0.725499	-0.2646	0			637	-0.720647	0.739511	0.116689	0.207877	0.415521	-0.140506	-0.69925	1			1	0	0	0
	625	0.962972	-1.15294	-0.0920667	0.47576	-1.46831	0.820513	0.904018	0			641	-0.733066	0.415166	-0.966089	0.315604	-0.313334	-0.295431	-0.166695	1			0	1	1	1
	627	2.26177	-1.09073	-0.075487	0.310206	-1.41788	0.687415	0.890568	0			649	-0.599144	-0.468919	0.131386	0.55181	-0.486958	0.625698	0.163684	1			0	0	0	0
	628	-0.125964	-0.370737	-0.0779485	0.600931	-1.42536	0.687415	0.104439	0			665	-0.316574	-0.14071	0.311846	-0.340889	-0.239655	-0.334334	0.132366	1			0	0	0	0
	629	0.401631	-0.65498	-0.0654823	0.47576	-1.38744	0.687415	0.52211	0			671	1.2218	-1.09861	-1.38254	-0.252098	-0.681492	0.225691	1.32042	1			0	0	0	0
	632	-0.554607	0.367952	0.126089	0.398057	-0.0491899	0.71135	-0.578234	0			678	-0.745887	1.14379	0.695474	-0.400369	0.415521	-0.0287649	-0.769857	1			0	0	0	0
	635	-0.674029	-1.123	-0.328254	0.840588	-0.688626	1.35195	0.255938	0			694	-0.628323	-0.638695	0.193623	-0.205715	-0.599273	0.408588	0.722889	1			0	0	0	0
	636	-0.750693	-0.424116	-1.94575	0.802537	-1.67411	1.37494	-0.397935	0			698	-0.642304	0.443438	-0.0275933	-0.215718	-1.27219	0.200069	-0.307311	1			0	0	1	0
	644	2.25766	-1.62438	0.435817	-1.01414	0.415521	-0.545234	2.01544	0			703	-0.464358	-0.987213	0.308855	-0.815746	-0.248753	-0.107881	1.13952	1			0	0	1	1
	645	1.43184	-1.21031	0.153402	-0.248563	0.415521	0.705634	1.23867	0			720	-0.350218	-0.394109	0.679281	-1.07363	0.87804	-0.719645	0.692197	1			1	1	1	1
	646	0.28653	-0.217041	0.469994	-0.248563	0.241414	-0.501714	0.370103	0			732	-0.689516	-0.0436246	0.0596518	0.301987	-1.0068	0.845941	0.0775864	1			0	0	0	0
	653	2.44425	-0.114453	0.190116	-0.289171	0.0925304	-0.118483	-0.166588	0			736	-0.74926	1.29844	1.21854	-1.10647	0.415521	-1.0239	-0.0627623	1			0	0	0	0
	654	1.10537	-0.324867	0.102096	0.0421612	-0.780576	0.891476	0.331091	0			743	-0.751386	0.589004	0.28264	-0.399851	-0.328495	-0.226294	-0.516243	1			0	0	0	0
	655	-0.781679	1.43219	-2.00074	1.34295	-1.58314	1.10319	-1.45474	0			749	-0.766717	0.52405	0.00309286	-0.631614	-1.17885	0.101078	0.347309	1			1	1	0	0
	658	-0.781679	1.43826	0.661112	0.0341046	0.415521	-0.986094	-1.27764	0			755	-0.406294	0.456607	0.0463714	0.850591	-0.639747	0.682775	-0.641442	1			0	0	0	0
	659	1.82279	-0.97658	-0.194199	0.676981	-1.77899	0.490803	0.335914	0			761	-0.689516	-0.244855	0.0715109	0.426639	-0.625992	0.644971	0.139161	1			1	1	0	0
	661	0.0279059	0.353477	0.352409	-0.246323	0.415521	-0.327304	-0.326163	0			769	-0.781679	0.513194	0.662052	0.13413	0.962001	-0.757449	-0.192935	1			1	1	1	1
	663	0.425031	-0.151797	0.560799	-0.433215	0.517633	-0.501714	0.426053	0			776	-0.749399	0.968872	1.13861	-0.874708	0.415521	-0.843773	-0.725958	1			1	1	0	1
	667	-0.380605	0.283081	-0.294244	0.0341046	-0.579923	0.180055	-0.607404	0			783	-0.652161	0.238265	0.612833	-1.07363	0.675913	-0.739074	0.456482	1			0	0	0	0
	669	-0.715643	0.766503	0.199741	0.715417	-0.0977091	0.329472	-0.747055	0			791	-0.759393	-0.32534	-1.83633	0.661121	0.415521	1.11899	0.32077	1			1	0	0	0
	674	0.621908	0.652889	-0.0844376	-0.474116	-1.4451	0.196373	-0.0710406	0			812	-0.781679	1.30704	0.0999589	0.0626865	0.415521	-0.447665	-1.23205	1			1	1	0	1
	675	1.09916	-0.937885	0.52846	-0.525021	0.419262	-0.40642	0.90955	0			826	-0.781679	1.61046	0.397837	0.479892	0.0219217	-0.491251	-1.45297	1			0	0	0	0
	679	-0.781679	-1.59529	-2.01288	1.47678	-1.66878	2.03962	0.729311	0			842	-0.753468	0.356146	-0.813935	-0.00175611	-0.334779	-0.419042	-0.360373	1			1	1	1	1
	681	1.77091	-0.542665	0.139969	-0.0810629	-0.353637	-0.149193	0.615975	0			851	-0.0777058	-0.811244	0.281383	0.185392	-0.332318	-0.142531	0.766438	1			0	0	0	1
	682	1.66868	-1.21206	0.341205	-0.514499	-0.150348	0.0786918	1.06757	0			868	-0.675348	0.79732	0.661664	0.725745	0.985688	-0.453195	-0.812024	1			0	0	0	0
	683	0.105475	0.875068	0.207805	-0.0785162	0.884529	-0.719645	-0.57017	0			872	-0.781679	-0.0863762	0.696856	-0.259085	0.415521	-0.0165269	0.341121	1			1	1	1	1
	685	2.31423	-2.19816	1.07571	-1.45616	0.415521	-0.545234	2.56634	0			877	-0.736337	-0.714834	-0.865644	-0.0265447	-0.338891	-0.295431	0.959314	1			0	0	0	0
	686	0.621908	-1.82446	1.17855	-0.792904	0.415521	-0.910486	1.82904	0			883	0.374483	-0.214672	0.253686	-0.432696	0.415521	-0.194205	0.391303	1			1	1	1	0
	687	0.325214	-0.92056	-0.762542	-0.343904	0.0881822	-0.218902	0.885622	0			889	-0.774331	0.844758	0.182891	-0.109645	-0.631921	-0.0844439	-0.906544	1			0	0	0	0
	689	1.73148	-1.48549	0.226786	-0.940917	-0.498396	-0.169033	1.6912	0			895	-0.777445	0.950991	0.47398	-0.535025	0.415521	-0.459301	-0.739569	1			0	0	0	0
	690	0.889455	-1.43897	-0.185705	1.06562	-1.75315	2.74826	0.714926	0			906	-0.753884	0.246785	0.159687	1.17933	-0.529644	0.516301	-1.09671	1			1	1	1	1
	700	2.21776	-1.08193	0.550084	-0.597783	0.415521	-0.928604	1.55834	0			910	-0.753977	1.4763	0.0268402	0.438584	-1.10661	-0.24098	-0.984349	1			1	1	0	0
	705	0.181772	-0.786342	-0.335211	1.40269	-0.469719	1.09621	0.199905	0			918	-0.765882	0.198172	0.277553	0.566077	0.453515	-0.0919551	-0.66875	1			0	1	0	0
	706	1.40573	-0.621191	0.410885	-0.308563	0.0616112	0.0294408	0.659187	0			928	-0.599144	-0.610885	-1.50109	0.979019	-0.137326	0.590674	-0.0936753	1			0	0	0	0
	708	2.1637	-0.78042	0.258358	-0.516965	0.415521	-0.061106	1.05189	0			938	-0.0109745	-0.233858	1.17093	-1.2906	0.415521	-1.0617	0.647704	1			1	1	0	0
	710	2.35023	-1.70639	0.243012	-0.63967	0.415521	0.27191	1.707	0			956	-0.627062	1.18094	0.219121	0.908997	-0.0706303	-0.200426	-1.10604	1			0	0	0	0
	711	-0.397758	-1.17237	-1.86221	0.544657	-1.46558	1.37494	0.617398	0			967	-0.641401	0.289709	-0.611535	-0.0336161	0.415521	-0.894199	0.171649	1			0	1	0	0
	712	1.61615	-1.3765	-1.43634	-0.37675	-0.602122	-0.12791	1.55876	0			977	-0.397672	0.276434	1.03229	-0.691613	1.95186	-0.986094	0.0772969	1			1	1	1	1
	715	1.68788	-1.99872	0.0425126	-0.52554	-0.123757	0.641204	1.81058	0			981	1.48533	-0.907761	0.963322	-0.32231	1.74206	-0.986094	0.990887	1			0	0	0	0
	717	0.35265	-2.10744	-0.912904	2.00553	-1.68295	2.3906	0.867583	0			994	-0.720188	-0.0215093	0.05546	0.218237	-0.367086	0.889527	-0.0433617	1			0	0	0	0
	718	-0.71202	2.13759	-0.52556	3.0235	0.415521	-1.0617	-2.86564	0			1006	-0.559042	0.0743569	-1.02193	-0.435711	0.415521	-0.40572	0.00981397	1			0	1	0	0
	721	-0.620674	0.0203976	-0.101356	-0.473598	-1.49657	0.196373	0.128341	0			1012	-0.761802	1.17377	0.498545	-0.174816	0.415521	-0.412135	-1.11234	1			0	0	0	0
	722	0.09662	-0.239305	-0.0882632	-0.63967	-1.45674	0.196373	0.607268	0			1017	-0.74829	0.869518	-1.90988	0.517891	-0.738543	0.659674	-0.882995	1			0	0	0	0
	723	2.20063	-1.69512	-1.42111	-0.37675	-0.18502	-0.043078	1.73302	0			1022	-0.550177	0.949692	0.86709	-0.182873	0.415521	-0.986094	-0.780218	1			0	0	0	0
	725	0.69025	-0.965717	-0.0969177	-0.63967	-1.48307	0.196373	1.09833	0			1032	-0.777306	0.89966	0.271068	1.1983	-0.0586016	0.547402	-1.24871	1			0	0	0	0
	727	0.963931	-0.49778	0.444615	-0.465541	0.164213	-0.501714	0.527164	0			1038	1.38357	-1.08901	1.19759	-1.45668	0.415521	-1.0617	1.60159	1			0	0	0	0
	728	-0.781679	-1.05498	0.0250806	0.46806	-1.11196	1.95799	0.488498	0														0	1	0	1
	738	2.44425	-1.92914	0.349159	-0.940917	-0.126152	-0.0173344	2.12987	0														1	0	0	0
	739	-0.171869	-1.18598	0.110656	0.550848	0.415521	0.838733	0.981933	0														0	0	0	0
	740	1.82013	-1.03355	-0.135679	-0.131968	-1.60097	0.304183	0.889491	0														0	0	1	1
	748	2.44425	-1.60326	0.628282	-1.29112	0.415521	0.00903932	2.06476	0														1	1	1	1
	753	-0.781679	1.04184	-4.30632	4.26085	0.415521	2.75028	-1.33074	0														1	1	1	1
	754	0.0400141	0.121054	1.27042	-1.45668	0.415521	-1.0617	0.799676	0														1	1	0	0
	759	-0.767737	0.172484	-0.00857094	0.735942	-0.704768	0.644971	-0.219098	0														0	0	0	0
	763	0.833874	-1.644	0.148208	-0.174816	-0.662293	0.731757	1.41113	0														0	0	0	0
	764	2.09649	-1.69709	0.0713361	-0.465541	-0.971257	0.787755	1.60255	0														0	1	0	0
	768	-0.417987	0.883618	1.2771	-1.45668	0.415521	-1.0617	0.257841	0														0	0	0	0
	771	-0.547521	0.612451	0.0327749	0.42629	0.960721	-0.24098	-0.67519	0														0	0	0	0
	773	-0.254243	0.849475	1.08759	-0.790957	2.76203	-0.843773	-0.6588	0														0	1	0	0
	778	-0.749399	0.708385	0.953744	-0.432696	0.415521	-0.260401	-0.49094	0														1	1	0	1
	781	-0.325004	0.633185	1.27579	-1.45668	0.415521	-1.0617	0.435621	0														0	0	0	0
	782	-0.781679	-0.113545	0.1598	-1.10647	-0.702161	-0.24098	0.942762	0														1	1	1	1
	788	-0.0909269	-0.427745	-0.201305	0.107333	0.415521	-0.121201	0.0925915	0														0	0	0	0
	789	0.256839	-0.0907419	0.553235	-0.0148537	0.888468	-0.554344	-0.155995	0														0	0	0	0
	790	-0.0311312	0.513245	0.533502	-0.473598	0.415521	-0.8908	-0.21999	0														0	0	0	0
	793	1.93473	-1.89256	0.140302	-0.506962	-0.76147	0.173025	1.82814	0														0	0	0	1
	794	-0.779864	0.502098	0.0552963	-0.399851	-1.02005	0.0771642	-0.429382	0														0	1	0	1
	795	-0.506806	-1.22079	-1.85849	0.803055	-1.34471	1.17183	0.557401	0														0	1	1	1
	797	0.0279059	-0.558995	0.227528	-0.557867	0.415521	-0.061106	0.893391	0														0	0	0	1
	798	-0.246769	1.43701	-1.94981	0.651118	0.415521	0.361586	-1.34836	0														0	0	0	0
	799	-0.659499	0.170239	-0.0299577	0.0960193	0.160748	0.493419	-0.484576	0														0	0	0	0
	801	1.48733	-3.10354	-1.13103	2.32861	-1.90562	3.38573	1.53627	0														1	1	0	0
	802	-0.638918	1.92844	0.233871	-0.215718	0.415521	-1.0617	-1.7993	0														0	0	0	0
	804	-0.115869	0.342599	0.237694	0.268587	0.415521	-0.140506	-0.25066	0														0	1	0	1
	806	-0.599144	0.0583248	-1.01761	-0.251579	0.415521	-0.196409	0.173631	0														0	0	0	0
	808	-0.762682	0.636691	0.0839321	0.107852	-0.932942	0.210263	-0.706774	0														0	0	0	0
	810	-0.781679	0.826019	0.209545	0.176816	0.415521	0.384304	-0.424648	0														0	0	0	0
	815	0.750912	-1.03284	-0.0724393	-0.203687	-0.785156	0.28692	1.1502	0														0	0	0	0
	816	-0.692575	-0.532697	-3.51462	1.97889	0.415521	1.57671	0.392038	0														0	0	0	0
	817	-0.76848	1.50222	-4.43971	4.54577	-7.05063	3.19835	-1.69286	0														0	0	0	0
	819	-0.775446	0.204161	-3.99863	3.19355	0.415521	2.30078	-0.444498	0														0	0	0	0
	820	-0.704323	0.0998657	-3.68531	2.11645	-6.24243	1.75021	-0.0736142	0														0	0	0	0
	821	-0.777073	1.15962	-4.27928	3.93844	-6.90126	2.83632	-1.29408	0														1	1	0	1
	824	-0.759485	0.812336	-4.11884	3.33111	-6.7233	2.47428	-0.891756	0														0	0	0	0
	825	-0.781679	1.84078	-4.56354	5.15309	-7.17769	3.56039	-2.0886	0														0	0	0	0
	827	2.44425	-0.954148	0.522519	-0.326104	0.40119	-0.235517	0.611567	0														1	1	1	1
	829	-0.716056	0.969512	-1.26427	0.590765	-1.49916	0.990197	-1.19171	0														0	1	1	1
	831	2.37391	-0.632658	0.532918	-0.514499	0.432823	-0.684806	0.681718	0														0	0	0	0
	832	1.07424	-1.25896	-0.191467	-0.295494	-0.858948	0.28692	1.05949	0														0	0	0	0
	834	1.46384	-0.901507	0.703708	-1.19828	0.415521	-0.545234	1.09426	0														0	0	0	0
	835	-0.163711	0.104085	-1.64186	0.54967	0.415521	0.610822	-0.582491	0														0	1	0	0
	836	-0.390008	-0.177836	-1.65043	0.54967	0.415521	0.416486	-0.365608	0														0	0	0	0
	839	-0.761709	0.38166	1.18805	-0.874708	0.415521	-0.843773	-0.316348	0														0	0	0	0
	841	-0.722025	-0.143318	-0.580624	-0.892508	0.415521	-0.894199	0.616392	0														0	0	0	0
	844	1.52065	-0.571665	0.291864	0.250726	-0.300436	-0.330811	0.373905	0														0	0	0	0
	846	1.34719	-0.859564	0.253803	-0.432696	0.415521	-0.194205	0.931238	0														0	0	0	0
	849	1.0429	-0.391528	-1.37589	0.817191	-0.0896035	0.707133	-0.133223	0														0	0	0	0
	850	2.18097	-1.01685	0.400139	0.0669498	0.0289246	0.0812531	0.345551	0														0	0	0	0
	855	-0.775446	0.0585725	-4.02057	3.19355	0.415521	2.11915	-0.33044	0														0	0	0	0
	856	-0.764815	0.764575	-4.36565	4.40821	0.415521	2.84322	-1.1437	0														0	1	1	1
	857	-0.758466	0.696255	-0.121869	0.566595	-0.339032	0.186662	-1.29029	0														1	1	1	1
	859	0.652786	-0.868531	-0.21055	0.899549	-1.82872	1.55144	0.686902	0														0	0	0	0
	860	-0.510493	-0.756739	0.466504	0.140178	0.230799	0.503663	0.134841	0														0	0	0	0
	861	0.256839	-0.94058	-0.329355	1.18571	-0.466704	1.09621	0.375308	0														0	0	1	1
	863	2.05619	-0.960849	0.502933	-0.650192	0.34161	-0.103658	1.10226	0														0	0	0	0
	865	-0.76913	0.828946	0.970482	-0.109126	0.415521	-0.94829	-1.00615	0														0	0	0	0
	866	-0.555051	0.241983	0.221909	0.678365	0.150326	-0.415391	-0.355874	0														0	0	0	0
	875	2.06503	-1.23774	0.359948	-0.848591	-0.0933344	-0.368616	1.67527	0														1	1	1	1
	880	0.128113	-0.556102	0.250353	-0.557867	-0.426707	-0.273321	0.753758	0														0	0	0	0
	881	-0.740395	-0.661469	-1.999	0.63893	-1.9919	1.12769	0.36996	0														0	0	0	0
	887	-0.661766	0.97852	-1.67434	1.41758	0.415521	0.610822	-1.45133	0														0	0	0	0
	891	-0.670619	0.99864	1.25945	-0.665786	0.415521	-1.0617	-0.832987	0														0	0	0	0
	893	-0.26381	-0.0702552	0.640005	-0.308044	0.415521	0.14062	-0.00228546	0														0	0	0	0
	898	-0.653202	0.0642733	-0.0743578	-0.25662	-1.41444	-0.0378749	-0.135148	0														0	0	1	1
	899	-0.212874	-0.118374	0.251047	-0.117701	0.415521	-0.171226	-0.0659179	0														0	1	1	1
	901	-0.693625	-0.99494	0.16542	-0.150028	-0.685065	0.539024	0.492875	0														0	0	0	0
	904	2.32642	-0.977636	0.261209	-0.259085	1.09813	0.141039	1.0938	0														1	1	1	1
	905	-0.712386	1.19733	-0.0437109	0.457538	-1.32122	0.452107	-1.16254	0														0	0	0	0
	911	-0.781679	0.718653	0.350588	0.440906	-0.121807	-0.273321	-0.973973	0														0	1	0	0
	913	-0.583775	-0.0743174	-0.593073	3.67727	-0.840363	3.45948	-2.06115	0														0	0	0	0
	914	1.4859	-1.47148	-1.99865	0.8816	-1.64557	1.60687	0.711222	0														1	0	0	0
	919	0.165853	-1.72212	-1.42224	-0.302209	-0.502722	-0.022761	1.4351	0														0	0	0	0
	922	-0.712386	1.71694	0.55661	1.16599	0.50489	-0.0304575	-2.3784	0														1	1	0	0
	924	1.06173	-0.893444	0.583424	-0.424639	0.415521	0.163599	0.931669	0														0	0	0	0
	925	2.20553	-1.18116	0.201847	-0.0662776	-0.121699	0.0630218	0.933632	0														0	0	0	0
	929	0.38355	-0.609064	0.634844	-0.86717	0.415521	-0.0165269	0.808906	0														0	0	0	0
	931	-0.757957	1.93133	-1.84147	1.73081	0.415521	0.416486	-3.36534	0														1	1	1	1
	934	-0.50172	-1.91314	0.0587384	-0.289465	-1.00958	0.00203682	1.78254	0														0	0	0	0
	936	-0.756383	0.535173	0.389046	0.251436	0.415521	-0.757701	-0.191982	0														1	1	1	1
	937	0.970004	-0.539661	0.584002	0.313209	0.875026	-0.548742	-0.0229591	0														0	0	0	0
	939	1.46355	-2.12483	-1.43	0.673791	-1.69451	0.637265	1.73398	0														0	1	1	1
	941	-0.76449	-0.679742	-1.50587	0.0703192	0.415521	0.477252	0.294973	0														1	1	1	1
	942	-0.7631	0.195034	-1.55421	0.545176	-1.73253	1.61653	-0.534824	0														0	0	0	0
	943	2.42863	-0.0762999	-1.4739	1.16088	-1.45058	0.615023	-0.389766	0														0	0	0	0
	946	2.44425	-1.46965	-1.59589	0.300913	-0.194216	0.546198	1.06424	0														0	0	0	0
	947	2.03083	-1.13748	-1.24505	0.186508	0.415521	-0.289211	0.956153	0														0	0	0	0
	949	-0.781679	2.28027	0.421063	0.449481	0.0925718	-0.303057	-2.67362	0														0	0	0	0
	952	-0.774006	1.9086	0.907005	-0.275199	2.5615	-0.8908	-1.57374	0														0	0	0	0
	953	-0.776097	1.9086	0.907005	-0.275199	2.5615	-0.8908	-1.57374	0														1	1	1	1
	954	2.44425	-1.16637	-1.18304	9.49522	-3.05653	16.3566	-3.19827	0														0	0	0	0
	959	0.841104	-0.939068	0.423938	0.102514	0.101318	-0.0984692	0.839975	0														0	0	0	0
	961	-0.7631	2.6026	0.0221994	0.949127	-1.12073	0.16523	-2.80423	0														0	0	0	0
	962	-0.703225	0.0489858	-0.251618	-0.00679717	-0.365382	-7.06131e-05	-0.34491	0														0	0	0	0
	964	-0.73998	-1.19592	-1.58561	0.357187	-0.833739	0.734617	0.52928	0														0	1	0	0
	965	0.728761	-0.30789	0.505559	-0.441271	0.349599	0.262605	0.257221	0														0	0	0	0
	966	-0.325848	-0.9004	0.215994	0.370916	-0.32535	-0.19746	0.880298	0														0	1	1	1
	972	-0.728923	2.1375	0.284014	0.809689	-0.324316	0.196373	-3.11368	0														1	1	1	0
	973	2.26443	0.313922	1.26853	-1.03987	0.415521	-1.0617	0.627559	0														0	0	0	0
	974	0.243043	-0.149158	0.47306	-0.797167	0.25074	-1.0617	0.45771	0														0	1	1	1
	976	1.00501	-2.51111	-0.978361	2.15254	-1.7658	2.86926	1.15527	0														0	0	0	0
	983	1.43473	-1.9334	0.323887	-0.338423	-0.203026	-0.174481	1.63846	0														1	1	1	1
	984	-0.179223	-0.594944	0.988079	-0.874708	0.415521	-0.655493	0.443266	0														0	0	0	0
	986	2.02727	-0.774802	0.133177	-0.174816	0.849264	0.16577	0.534441	0														0	0	0	0
	988	-0.651482	-1.04083	0.363322	-0.866651	-0.0830708	0.0597618	0.842116	0														1	1	1	1
	990	0.873176	-0.857043	0.149298	-0.134433	-0.734107	0.684724	0.454585	0														0	0	0	0
	992	-0.488592	-0.593338	-1.57062	0.037474	-0.770169	0.230009	0.312476	0														1	1	1	1
	993	-0.599144	-0.665342	-1.54352	-0.128599	-0.736878	0.195169	0.667083	0														0	0	0	0
	995	-0.0549574	0.605857	0.4985	0.250563	0.328127	0.129506	-0.517845	0														0	0	1	0
	997	-0.507421	-0.0261998	0.177279	0.615554	-0.648993	0.442397	-0.599644	0														1	0	1	1
	1000	-0.230204	0.198226	0.11581	0.268587	0.415521	-0.0074074	-0.150066	0														1	1	1	1
	1001	-0.781679	0.68152	0.518462	0.111645	0.388847	-0.719645	-0.402639	0														1	1	1	1
	1003	0.55604	-0.881367	0.553213	-0.182873	0.415521	0.944887	0.4831	0														0	0	0	0
	1005	-0.338102	1.06479	0.767568	0.026048	1.7796	-0.455353	-1.33541	0														0	0	0	0
	1008	-0.622428	0.594894	-1.28738	-0.892508	0.415521	-0.565262	0.315309	0														1	0	0	0
	1016	1.57707	-1.92197	0.866261	-1.45668	0.415521	-0.529308	2.374	0														0	0	0	0
	1018	-0.764212	-0.752741	-2.11527	1.09425	-1.98246	1.74683	0.222733	0														0	0	0	0
	1023	-0.184132	-1.40871	0.1467	-0.131968	-0.435427	0.500627	1.32431	0														0	0	0	0
	1026	-0.781679	0.77663	1.36635	-0.915609	0.415521	-1.0617	-1.06295	0														1	0	1	1
	1027	-0.731777	0.813367	-1.66315	-0.395847	0.415521	-0.565262	-0.963354	0														0	0	0	0
	1030	0.915383	-0.385157	-1.40465	-0.892508	0.415521	-0.565262	0.552843	0														1	1	1	1
	1034	0.120835	-0.339504	0.178693	-0.981818	-0.644691	-0.24098	1.04301	0														0	0	1	1
	1037	-0.689516	0.662512	0.423134	0.111632	0.0988706	-0.586546	-0.745368	0														0	0	0	0
	1039	2.33358	-1.61637	0.641497	-1.07363	0.763106	-0.719645	1.86463	0														0	1	0	0
	1041	-0.720326	0.183897	0.190172	-0.00679717	-0.609773	0.196373	-0.2546	0														0	0	1	0
	1042	0.784274	-0.407594	0.524885	-0.191448	0.408385	0.0609016	0.0984625	0														0	0	0	0
	1044	-0.466793	-0.481179	0.0650643	-0.25662	-0.990335	0.158557	0.398874	0														0	0	0	0
	1046	-0.733941	0.739971	-0.0197942	0.374972	-0.261704	-0.235265	-0.732981	0														0	0	0	0
	4	0.0590888	0.127155	0.0246907	0.416636	-0.370829	-0.111389	-0.419203	1														0	0	0	0
	6	2.30057	-1.06342	0.57511	-1.12505	0.415521	-0.412135	1.24104	1														0	0	0	0
	7	-0.167788	0.0820805	0.244563	-0.392313	0.540713	0.408588	0.36595	1														0	0	0	0
	9	-0.669665	0.470254	0.0404469	-0.183229	0.287151	-0.301574	-0.490027	1														0	1	1	1
	17	2.25669	-2.33394	0.0200148	-0.234784	-0.484338	0.319009	2.20785	1														0	0	0	0
	18	-0.733987	0.604015	0.00359186	0.375734	-1.17733	0.196373	-0.800966	1														0	0	0	0
	19	-0.658593	-1.15433	0.485333	-0.9813	0.415521	-0.0287649	1.24667	1														1	0	1	1
	27	-0.777073	1.02733	0.753766	-0.506443	0.415521	-1.0617	-0.803344	1														1	1	1	1
	28	-0.108614	0.109823	1.26519	-0.72342	0.415521	-1.0617	0.273371	1														1	0	0	1
	29	-0.781679	-0.977773	0.535153	-0.948454	0.43962	-0.558948	0.981278	1														0	0	0	0
	31	1.24023	-0.577467	0.594097	-1.10647	0.415521	-1.0617	1.00319	1														0	0	0	0
	32	-0.781679	-0.138477	0.330438	-0.547344	0.415521	-0.447665	0.433338	1														0	0	1	1
	33	-0.469012	-0.558547	0.0996204	-0.547344	0.415521	0.166374	0.761356	1														0	0	0	0
	35	-0.781679	0.188441	1.10433	-1.12453	0.415521	-0.628807	0.10319	1														0	0	0	0
	36	1.11374	-0.927942	1.42613	-1.45668	0.415521	-1.0617	1.58565	1														0	1	0	0
	41	-0.676258	0.211101	0.92051	-0.940398	0.415521	-1.0617	0.0615555	1														0	0	0	0
	45	-0.722944	1.00786	0.137517	1.22956	0.422968	-0.168879	-1.83838	1														0	0	0	0
	46	-0.700937	1.49926	0.00459064	1.17158	0.0899754	-0.0158423	-1.40106	1														0	0	0	0
	47	-0.781492	0.518188	0.478814	0.158919	0.415521	-0.0287649	-0.575926	1														1	1	1	1
	50	-0.338525	0.125619	0.428287	0.158919	0.90788	-0.24098	-0.189865	1														0	1	1	1
	51	-0.631026	0.66332	0.2618	0.923501	0.98768	-0.24098	-0.730566	1														0	0	0	0
	54	-0.723864	1.09817	0.735918	-1.07363	1.05033	-0.719645	-0.0802172	1														0	0	0	0
	57	1.66648	-0.294166	0.279071	-0.782901	-0.339352	-0.40642	0.377241	1														0	0	0	0
	59	-0.592436	0.945615	0.322008	0.603234	-0.208742	0.101078	-0.956825	1														0	0	0	0
	62	-0.659771	1.3465	-3.83036	3.00604	-2.04876	1.72888	-1.1604	1														1	1	1	1
	64	0.549052	0.146513	0.936588	-0.999878	0.415521	-0.482779	-0.0348639	1														0	0	0	0
	68	-0.619775	-0.736673	0.194588	0.0012594	-0.596338	1.30843	0.521557	1														0	0	0	0
	69	-0.781679	0.515675	0.300475	0.798792	0.0382243	-0.186997	0.0799012	1														1	0	0	0
	71	-0.781679	0.907588	-0.314018	0.268587	0.415521	-0.0287649	-1.00955	1														1	1	1	1
	72	-0.594671	0.0205138	0.67235	-0.690575	0.415521	-0.0287649	0.107862	1														0	0	0	0
	73	1.22422	-0.340144	-1.92399	-0.312862	0.415521	-0.51865	0.656029	1														0	0	0	0
	76	-0.696366	-0.446214	0.149786	-0.297522	-0.282121	0.791958	0.359206	1														0	0	0	0
	77	-0.37719	-0.172313	0.763381	-0.547344	0.415521	-0.545234	0.436901	1														0	0	0	0
	79	-0.691342	-0.446214	0.322821	-0.215718	-0.20627	0.791958	0.359206	1														0	0	0	0
	83	-0.711836	0.338567	0.45498	-0.506443	0.415521	-0.545234	-0.206223	1														0	0	0	0
	84	-0.300178	-0.172313	0.758607	-0.506443	0.415521	-0.545234	0.436901	1														1	1	0	0
	85	-0.614788	-0.145739	0.632	-0.16676	0.415521	-0.0165269	0.358024	1														0	0	0	0
	92	-0.705056	1.00005	0.456739	0.601397	0.415521	-0.0287649	-0.575074	1														0	1	0	1
	93	-0.781679	0.526921	0.434717	0.896122	0.415521	-0.0287649	-0.251754	1														0	0	0	0
	96	-0.382227	-0.102032	1.06682	-0.948973	0.415521	-0.663647	0.48411	1														1	1	0	0
	98	0.886529	-0.541327	1.02873	-0.764322	0.415521	-0.663647	0.760312	1														1	1	1	1
	99	0.100087	-0.411623	0.754493	-0.764322	0.415521	-0.545234	0.658361	1														0	0	0	0
	100	-0.208757	-0.311486	0.178083	-0.330367	0.415521	0.166374	0.52639	1														0	0	0	0
	106	-0.641852	-0.47754	0.452322	-0.264677	0.187659	-0.0551386	0.271914	1														0	0	1	1
	110	-0.781679	0.532869	0.591396	-0.690575	0.415521	-0.545234	-0.382828	1														0	0	0	0
	111	0.787597	-0.676947	0.427116	-1.03272	0.110985	-0.539519	0.76182	1														0	0	0	0
	116	-0.737582	0.0245588	0.415886	-0.565923	0.076823	-0.107881	0.0826099	1														0	0	0	0
	118	-0.682677	-0.343033	0.992523	-0.907553	1.83089	-0.843773	0.434883	1														0	0	0	0
	119	-0.463749	-0.24764	0.640153	-0.908072	0.415521	-0.412135	0.604955	1														0	0	0	0
	121	1.31468	-0.959055	0.626261	-1.07363	0.415521	-0.412135	1.13312	1														1	0	0	0
	123	-0.296403	-0.344021	0.978557	-0.907553	0.415521	-0.663647	0.453032	1														0	0	0	0
	124	2.44425	0.475191	0.338564	-0.440752	0.415521	-0.447665	-0.337892	1														0	1	1	1
	127	-0.575041	0.407701	0.539889	-0.114463	0.415521	-0.545234	0.00017677	1														0	0	0	0
	129	-0.660406	0.19435	0.54126	-0.0221377	0.415521	-0.545234	0.139543	1														0	1	1	1
	130	-0.78112	-0.0394187	0.545373	-0.280017	0.415521	-0.545234	0.362584	1														0	0	0	0
	133	-0.776701	2.10951	0.358269	0.8401	0.415521	-0.0287649	-2.85243	1														0	0	0	0
	136	-0.275067	0.0781139	0.982222	-0.215718	0.415521	-0.26559	-0.0429982	1														1	1	1	1
	137	-0.781679	0.20211	0.238958	-0.506443	0.415521	-0.447665	0.0045887	1														0	0	0	0
	142	-0.151501	-0.371033	0.91858	-0.72342	0.415521	-0.663647	0.545937	1														0	0	0	0
	144	0.14378	-0.564836	0.293899	-0.782901	-0.294248	-0.491251	0.692488	1														0	0	0	0
	145	-0.667303	0.202045	0.717904	-0.65773	0.415521	-0.545234	-0.109048	1														0	0	0	0
	147	-0.171869	-0.186575	0.720823	-0.72342	0.415521	-0.545234	0.517832	1														0	1	0	0
	148	1.25497	-0.784149	0.986835	-0.940398	0.415521	-0.663647	0.979895	1														0	1	0	0
	149	-0.435235	-0.381299	0.310124	-0.72342	0.415521	-0.447665	0.660739	1														1	1	1	1
	152	-0.69399	0.798853	0.614263	0.472414	0.415521	-0.545234	-0.326096	1														1	1	0	0
	153	-0.316153	-0.0394187	0.622833	-0.239115	0.415521	-0.545234	0.362584	1														0	0	0	0
	154	-0.781679	0.205474	0.645687	-0.386478	0.415521	-0.545234	0.201328	1														0	0	0	0
	157	-0.506982	0.0608831	0.716178	-0.815746	0.415521	-0.545234	0.35711	1														0	1	0	1
	158	-0.778096	0.271736	0.681278	-1.03272	0.415521	-0.412135	0.325009	1														0	0	0	0
	160	-0.781679	1.59557	0.257663	0.0879627	0.415521	-0.0287649	-1.73655	1														0	0	0	0
	167	-0.741179	1.47268	1.04554	-0.110164	0.415521	-0.26559	-1.09545	1														1	1	1	1
	168	-0.776515	0.578486	1.06886	-0.174816	0.415521	-0.986094	-0.354923	1														0	0	0	0
	174	-0.0335084	0.501753	0.513753	0.508768	0.967975	-0.453195	-0.541131	1														0	0	0	0
	176	-0.510932	-0.0616099	0.994579	-1.03272	0.415521	-0.663647	0.523798	1														0	0	0	0
	177	-0.0709095	-0.345509	0.952729	-1.03272	0.415521	-0.530548	0.753071	1														0	0	0	0
	178	-0.617977	0.0680937	0.72034	-1.03272	0.415521	-0.545234	0.421846	1														0	0	0	0
	180	-0.550177	-0.244382	-1.61578	0.489895	0.415521	0.0717827	-0.0716688	1														0	0	0	0
	181	-0.781679	-0.371033	0.931835	-0.72342	0.415521	-0.663647	0.545937	1														0	0	0	0
	184	-0.675393	0.641997	0.509253	-0.285689	0.415521	-0.545234	-0.398072	1														1	1	1	1
	187	-0.764722	0.992597	0.725156	-1.03272	0.415521	-0.545234	-0.210383	1														0	0	0	0
	188	-0.749445	0.425932	0.998164	-1.03272	0.415521	-0.663647	0.201078	1														0	0	0	0
	189	-0.66585	0.142032	0.955517	-1.03272	0.415521	-0.530548	0.42696	1														0	0	1	0
	191	0.517475	-1.12107	0.549119	-0.908072	0.415521	-0.107881	1.24048	1														1	1	0	1
	193	-0.711011	1.66547	0.6773	-0.0173193	2.38292	-0.374331	-1.45171	1														0	0	0	0
	194	-0.65678	0.19435	0.540346	-0.0221377	0.415521	-0.545234	0.139543	1														1	1	1	1
	197	-0.781679	-0.995179	0.27554	-0.72342	0.415521	-0.0496082	1.11957	1														1	0	0	0
	198	-0.167788	-0.865475	0.245069	-0.72342	0.415521	0.0688044	1.01762	1														0	0	1	1
	199	-0.241794	0.319441	0.767754	-0.958977	0.415521	-0.303421	-0.0389569	1														1	1	0	1
	201	-0.781679	1.23149	0.726153	-1.03272	0.415521	-0.545234	-0.371696	1														1	1	1	1
	202	-0.674029	0.183283	0.996607	-1.03272	0.415521	-0.663647	0.362541	1														0	0	0	0
	203	-0.188227	-0.309068	0.991839	-1.03272	0.415521	-0.663647	0.68452	1														1	1	1	1
	207	-0.638241	0.489698	0.490113	0.508768	1.26187	-0.24098	-0.549049	1														1	0	0	0
	208	1.41735	-1.03697	0.669429	-0.72342	0.415521	-0.147178	1.12584	1														0	0	0	0
	209	-0.781679	0.619415	0.179735	0.259139	-0.641519	0.590989	-0.745818	1														1	1	1	1
	211	0.566154	-1.03268	0.250706	-0.598768	0.415521	0.0834906	1.11875	1														0	0	0	0
	212	-0.333873	-0.26569	1.11283	-0.907553	0.415521	-0.858598	0.393954	1														1	0	0	0
	217	-0.531175	-0.393982	0.431724	-0.182873	0.125001	0.408588	0.16868	1														0	0	0	0
	220	-0.756429	0.432949	0.719858	-0.698632	0.415521	-0.545234	-0.354459	1														0	0	0	0
	224	-0.730027	0.311039	1.26361	-0.915609	0.415521	-1.0617	-0.0583462	1														0	0	1	1
	228	-0.0917294	0.255398	0.455683	-0.607344	0.197881	-0.586546	-0.0248718	1														0	0	0	0
	231	-0.674938	-0.629787	0.563618	-0.823802	0.526207	-0.376099	0.585261	1														1	0	0	0
	233	2.11451	-1.53176	1.17474	-1.45668	0.415521	-0.685884	1.97522	1														0	0	0	0
	235	-0.319101	-0.743911	0.205659	0.142643	-0.562664	0.0792001	0.288902	1														0	1	1	1
	244	-0.752311	0.426897	0.628381	0.139803	0.723208	-0.757449	-0.00710433	1														0	0	0	0
	246	2.44425	-0.319857	0.255118	-0.557867	0.415521	-0.194205	0.705457	1														0	0	1	0
	247	-0.763331	-0.316551	0.700703	-0.60929	0.415521	-0.0165269	0.567007	1														0	0	0	0
	252	-0.554607	1.08744	1.12414	-0.440752	2.77995	-1.0239	-0.889595	1														0	0	0	0
	257	-0.781679	0.683405	0.5397	-0.391794	0.415521	-0.234457	-0.69549	1														1	1	1	1
	258	-0.66585	0.715085	1.24645	-0.874708	0.415521	-1.0617	-0.517989	1														0	0	0	0
	260	-0.4568	-0.0351589	0.506392	-0.0148537	0.415521	0.00903932	-0.218708	1														1	1	1	1
	262	1.20361	-0.954739	-0.0837898	-0.506443	-1.44313	0.196373	1.09006	1														0	0	0	0
	268	-0.308579	0.348178	0.832252	0.0012594	1.34336	-0.602863	-0.22738	1														0	0	0	0
	271	0.119685	-0.315961	-0.791489	-0.259635	0.078527	-0.151861	0.210571	1														0	0	0	0
	272	-0.781679	0.623916	1.0053	-1.12453	0.415521	-0.658458	-0.286923	1														1	1	1	1
	273	-0.565124	0.494177	0.211205	-0.20197	-0.545791	0.556975	-0.629466	1														0	0	0	0
	277	0.0555912	-0.902695	0.125931	-0.0713711	-0.485565	-0.140222	0.822742	1														0	0	0	0
	278	-0.781679	1.10919	-2.16482	0.661121	0.415521	0.747231	-0.784656	1														0	0	0	0
	279	-0.444533	0.427729	0.487212	-0.690575	0.293789	-0.539519	-0.703116	1														1	1	1	0
	282	-0.753468	0.0411326	-1.38738	0.62022	0.415521	-0.159511	-0.0306896	1														1	1	1	1
	284	-0.729797	1.33816	1.24344	-0.624885	0.415521	-1.0617	-1.1987	1														0	1	0	0
	288	0.573464	-0.8896	0.35837	-0.815746	-0.0981328	-0.226294	1.09347	1														0	0	0	0
	290	1.9539	0.571213	0.902962	-0.399851	0.415521	-0.689177	-0.376251	1														0	0	0	0
	291	-0.750416	0.0102453	0.310812	-0.649673	-0.242801	-0.107881	0.16358	1														0	0	0	0
	292	-0.781679	0.838511	0.236179	-0.565923	-0.469825	-0.186997	-0.414458	1														0	0	0	0
	294	-0.733527	0.746694	1.13657	-0.579073	0.415521	-1.0617	0.00630728	1														0	0	0	0
	299	2.04606	0.379955	0.231239	-0.267142	-0.484852	-0.0583558	-0.235046	1														0	1	1	1
	301	-0.688148	-0.343847	0.328619	-0.058221	-0.188633	0.541687	0.0909362	1														0	0	0	0
	305	-0.605368	1.97847	0.450509	-0.609809	0.182142	-0.186997	-0.676058	1														0	0	0	0
	306	-0.737259	0.29657	0.558012	0.0012594	0.509156	-0.68184	-0.192583	1														0	1	1	1
	307	-0.781679	-0.641121	0.986429	-0.32231	1.81235	-0.986094	0.724927	1														0	0	0	0
	310	-0.605861	0.389178	0.444197	-0.0278101	0.415521	-0.0287649	-0.262778	1														1	1	1	1
	311	-0.749907	0.976178	-2.59649	1.18685	0.415521	1.05734	-1.10998	1														0	0	0	0
	312	-0.6976	0.625015	0.46705	-0.175173	0.415521	-0.0287649	-0.418899	1														0	0	0	0
	318	-0.466793	0.343157	-0.575929	2.54597	-0.506981	0.83197	-1.67787	1														1	1	1	1
	319	-0.737443	0.343157	-0.575929	2.54597	-0.506981	0.83197	-1.67787	1														1	1	1	1
	322	-0.027172	0.0957916	0.190186	0.200644	0.415521	-0.212265	0.0927585	1														0	1	0	1
	324	-0.599144	0.746616	0.0288746	2.18639	0.415521	0.275237	-1.18606	1														0	0	0	0
	325	-0.780003	0.54966	0.423123	0.469045	0.412354	-0.478735	-0.5245	1														1	1	1	1
	328	-0.781679	0.944267	0.4682	-0.699669	0.235958	-0.586546	-0.498192	1														0	0	0	0
	331	-0.781679	0.924692	0.211068	0.794349	0.415521	0.384304	-0.554262	1														0	0	0	0
	332	0.485683	-0.00988526	0.402325	-1.07363	0.0355715	-0.62435	0.525863	1														1	1	1	1
	333	-0.781679	0.194584	0.654142	-0.373734	0.801572	-0.719645	0.402242	1														0	0	0	0
	338	0.560576	-0.505714	0.86427	-0.400369	0.415521	0.000607436	0.425581	1														0	0	0	0
	342	-0.574151	1.64256	-0.0287722	0.434877	-0.0864866	-0.415643	-1.7861	1														1	1	1	1
	343	-0.702767	0.251081	0.927752	-0.866651	0.415521	-0.260401	-0.053447	1														0	0	0	1
	347	0.315665	0.661293	0.113453	0.633501	-0.843142	0.984755	-0.758523	1														0	1	1	1
	349	1.7693	-1.42749	0.0332008	-0.422692	-1.08726	0.101078	1.41554	1														0	0	0	0
	352	-0.423499	-0.582137	0.333096	-0.20197	-0.175013	0.300827	0.281337	1														0	0	0	0
	356	-0.781679	1.18591	0.318861	0.31116	-0.218315	-0.454502	-0.814515	1														0	0	0	0
	357	-0.0311312	-0.669025	0.478172	-0.690575	0.266291	-0.40642	0.59564	1														0	0	0	0
	359	-0.781679	-2.70466	-0.584441	1.98079	-2.25914	4.63238	1.12738	1														0	0	1	0
	365	-0.131222	0.167971	0.652938	-0.275199	1.35323	-0.137544	-0.35293	1														0	0	0	0
	366	-0.763378	0.287256	-1.07645	0.158979	0.415521	-0.810447	-0.166976	1														0	1	1	1
	369	0.0746023	-0.202015	0.962712	-1.19828	0.415521	-1.0617	0.489047	1														0	0	0	0
	376	-0.554607	1.02306	0.964663	-0.182873	0.415521	-0.986094	-0.945426	1														1	1	0	0
	378	-0.4093	0.00212939	0.269378	-0.424639	-0.368837	-0.40642	0.236227	1														0	0	0	0
	379	-0.735369	1.39134	0.96512	-0.182873	2.59944	-1.0239	-1.28069	1														1	1	1	1
	382	-0.704781	0.661041	0.0804317	0.0950129	-0.94359	-0.186997	-0.662714	1														0	0	0	0
	383	-0.769454	-0.168239	0.335569	-0.182873	-0.167491	0.408588	-0.00158013	1														0	0	0	0
	385	-0.781679	0.567332	0.485308	0.293574	0.415521	-0.795505	-0.340797	1														0	0	0	0
	390	-0.713304	0.735151	0.078034	-0.00926268	-0.533445	0.0259701	-0.628294	1														0	0	0	0
	392	-0.781679	0.144609	-0.0191588	-0.128599	-0.225658	-0.491251	0.161392	1														0	0	0	0
	395	0.105475	0.178141	0.259093	0.0341046	-0.0523186	0.277625	-0.428123	1														0	0	0	0
	400	-0.737536	1.47988	0.20585	-0.419739	0.415521	-0.858598	-1.49394	1														0	1	0	1
	401	-0.554607	0.427432	0.914712	-0.109126	2.1337	-0.565059	-0.72674	1														1	1	1	1
	402	2.44425	-0.719222	0.231845	0.196095	0.415521	-0.241232	0.321333	1														0	0	0	0
	406	-0.781679	0.574355	-1.04417	0.215221	-0.561015	-0.373095	-0.570334	1														0	0	0	0
	412	-0.781679	-0.0669392	0.336776	0.156291	-0.163821	0.845941	-0.0166064	1														0	0	0	0
	416	-0.448994	1.11584	0.466162	1.21126	3.03987	-0.194205	-1.53161	1														1	1	1	1
	419	-0.781679	1.62809	-0.131083	0.821522	-0.477022	0.0655848	-1.63435	1														1	1	1	1
	420	0.905677	-2.37773	0.0322286	-0.816265	-1.09022	0.72897	2.21269	1														1	1	1	1
	422	-0.77173	0.267353	0.88934	-0.575926	0.415521	-0.437562	-0.0881309	1														0	0	0	0
	426	0.181772	-0.33329	0.220224	-0.285721	-0.518358	0.489893	0.182974	1														0	1	0	0
	430	2.18442	-1.30278	1.05603	-0.72342	2.09644	-0.986094	1.34257	1														0	0	0	0
	431	-0.781679	2.22634	-0.271731	0.268587	0.415521	-1.0617	-2.15946	1														0	0	0	0
	438	-0.356755	-1.25081	-2.44978	2.54813	-1.19689	1.6326	0.286572	1														0	0	1	1
	439	-0.0909269	-0.214672	0.253686	-0.432696	0.415521	-0.194205	0.391303	1														0	0	0	0
	440	0.947591	0.439862	0.777283	-0.205421	0.415521	-0.8908	-0.44255	1														0	1	0	0
	444	-0.604517	0.108817	-0.991015	0.00630046	0.415521	-0.404237	0.085156	1														0	0	0	0
	445	0.534693	-0.0137533	-1.44808	0.00630046	0.415521	-0.159052	0.245263	1														0	0	0	0
	446	-0.781679	0.243067	1.05473	-0.915609	0.415521	-0.946664	-0.119711	1														0	0	0	0
	448	1.36835	0.235814	0.437239	-0.940917	0.141779	-0.186997	0.689824	1														0	0	0	0
	449	-0.781679	1.17674	0.490805	-0.940917	0.304718	-0.186997	0.0245658	1														0	0	0	0
	452	1.70346	-1.03118	0.633879	-1.45668	0.415521	-1.0617	1.46353	1														0	0	0	0
	455	-0.781679	-0.9145	-1.38164	-0.542303	0.13641	-0.565262	1.08339	1														1	1	1	1
	456	-0.758466	0.871857	0.0394429	-0.215718	-1.06827	-0.0230497	-0.751977	1														1	1	0	0
	457	-0.762497	0.438687	-0.0976767	-0.215718	-1.48537	-0.217386	-0.421019	1														0	0	0	0
	462	-0.781679	1.9179	1.2083	-0.745146	0.415521	-1.0617	-0.515577	1														0	1	1	1
	464	0.0279059	-0.386055	0.248498	-0.731996	-0.43235	-0.186997	0.71795	1														1	1	1	0
	466	-0.738365	1.12403	0.683082	-0.400369	2.54458	-0.0287649	-0.816625	1														0	0	0	0
	472	-0.781679	1.52677	0.2784	-0.731996	-0.341394	-0.186997	-0.601979	1														0	0	0	0
	473	-0.779631	0.474714	0.258474	-0.0315858	-0.402004	-0.186997	-0.00683212	1														0	0	0	0
	474	0.14378	0.127155	0.0246907	0.416636	-0.370829	-0.111389	-0.419203	1														0	1	1	1
	477	-0.362366	0.245205	0.503379	-0.109645	0.342968	-0.320348	-0.544577	1														0	1	1	1
	478	1.68487	-1.46594	0.364161	-0.940917	-0.0805171	-0.186997	1.89561	1														0	0	0	0
	479	1.56584	-0.827363	0.225567	-0.731996	-0.502104	-0.186997	1.01404	1														0	1	0	0
	485	-0.344029	1.06348	0.274428	-0.731996	-0.353475	-0.186997	-0.280931	1														0	0	0	0
	489	-0.763656	0.334953	1.14107	-1.12453	0.415521	-0.843773	-0.0321512	1														0	1	1	1
	490	2.119	-0.473733	0.263314	-0.691094	-0.387284	0.0161077	0.813429	1														0	0	0	0
	495	-0.781679	1.1422	-2.2701	1.09508	-1.19659	0.654998	-1.15254	1														0	1	1	1
	496	-0.0849127	-0.093717	0.414685	-0.248563	0.0731711	-0.501714	0.0863562	1														0	0	0	0
	497	-0.607879	0.842606	0.0375359	0.278927	0.965458	-0.24098	-0.837675	1														0	0	0	0
	500	-0.414889	0.201436	0.49139	0.357674	0.306499	0.0960783	-0.659789	1														0	0	0	0
	501	0.066852	0.591921	0.876672	-0.440752	2.5714	-0.8908	-0.524157	1														0	0	0	0
	503	-0.631026	1.10439	0.531202	0.324829	0.427601	-0.644036	-1.5796	1														0	1	1	0
	511	-0.734632	0.60418	-0.936639	-0.15079	0.415521	-0.280161	-0.507803	1														0	0	0	0
	513	-0.781679	-0.176803	0.657342	-1.07414	0.811304	-0.719645	0.800495	1														0	0	0	0
	514	-0.517963	0.44555	0.472141	0.158919	1.20084	-0.24098	-0.504131	1														0	0	0	0
	521	-0.781679	0.164338	-0.708903	-0.328341	0.415521	-0.726696	0.142488	1														0	0	0	0
	522	-0.207523	-0.530557	-1.40763	0.605529	0.415521	-0.155918	0.432689	1														0	0	0	0
	523	-0.365855	0.228213	-0.799567	-0.892508	0.415521	-0.732766	0.412134	1														0	0	1	1
	525	-0.749168	0.428101	0.201041	-0.69915	-0.576709	-0.248532	-0.251536	1														0	0	0	0
	526	-0.781679	0.0809585	0.68055	-0.948973	0.881902	-0.719645	0.356095	1														0	0	0	0
	528	-0.0605344	-0.147662	1.15234	-1.2906	0.415521	-1.0617	0.574188	1														0	0	0	0
	531	-0.781679	1.5128	0.152697	0.643062	0.404624	-0.230365	-1.38552	1														0	0	0	0
	532	-0.781679	-0.246744	-0.330392	-0.331441	0.415521	-0.544289	0.214423	1														0	0	0	0
	533	0.0365021	-0.399398	0.621341	-0.908072	0.415521	-0.412135	0.727919	1														0	0	0	0
	537	-0.736752	0.867353	-0.247528	0.240723	-0.834294	0.065772	-1.01098	1														1	1	1	1
	539	-0.781679	-0.519089	-2.01215	1.26059	0.415521	1.51326	-0.156561	1														0	0	0	0
	541	-0.592973	0.556318	-1.28143	0.00630046	0.415521	-0.487599	-0.248189	1														0	0	0	0
	544	-0.781679	-0.154024	-1.00755	-0.0346013	0.415521	-0.196409	0.247186	1														0	0	0	0
	545	-0.743902	1.16406	-0.0865568	0.729308	-0.320097	-0.186997	-0.99309	1														0	0	0	0
	546	-0.689516	0.368477	0.0660317	-0.432696	-0.987393	-0.107881	-0.155028	1														0	0	0	0
	548	-0.781679	0.899871	0.150663	0.0644843	-0.267348	-0.0400085	-0.830381	1														0	1	0	0
	549	-0.752219	0.899871	0.150663	0.0644843	-0.267348	-0.0400085	-0.830381	1														0	1	1	1
	550	-0.766485	0.189446	0.289917	-0.701097	-0.306361	-0.140222	0.0448626	1														0	0	0	0
	552	-0.760319	1.14672	0.238346	0.841573	-0.169986	0.080857	-1.11373	1														0	0	0	0
	553	-0.781679	0.171147	-0.909746	-0.343904	0.415521	-0.810447	-0.00868588	1														0	0	0	0
	558	-0.741733	1.19463	-1.91105	0.475042	-0.329499	0.388005	-0.961045	1														0	0	0	0
	560	-0.761431	1.8578	-2.36241	2.05476	0.415521	1.67351	-2.14781	1														0	0	0	0
	562	-0.765047	-0.15246	-1.48301	-0.0794277	0.415521	-0.0576516	0.0175511	1														0	0	0	0
	563	-0.182086	0.385092	-2.00112	0.743444	-0.418117	0.54077	-0.550612	1														1	0	1	1
	568	-0.65284	-0.195435	0.108408	0.326776	-0.403074	0.240784	-0.223555	1														1	1	1	1
	570	0.289858	-0.266072	-1.88822	0.235742	-0.373382	0.0413383	0.234604	1														0	1	0	1
	571	-0.716561	0.977805	1.26168	-0.706688	0.415521	-1.0617	-0.817273	1														0	0	0	0
	574	-0.61618	1.16512	0.0254962	-0.0253758	0.577806	0.665793	-1.42892	1														0	1	1	1
	578	-0.781679	0.975219	-0.028243	0.0930662	-0.558045	0.290928	-0.607659	1														0	0	0	0
	580	-0.609986	0.249471	-2.13846	0.669697	-0.369284	0.617572	-0.183102	1														0	0	0	0
	585	-0.655194	-0.27413	0.351243	-0.608772	-0.119812	-0.118483	0.155859	1														0	0	0	0
	586	2.16938	-0.830097	0.257429	-0.516965	-0.405183	-0.165511	0.916589	1														0	1	0	0
	588	-0.781679	-1.39802	0.0123209	-0.289984	-1.13857	0.93289	1.54242	1														0	0	0	0
	593	-0.644111	0.485064	0.112944	0.180705	-0.84469	-0.107881	-0.0461048	1														0	0	1	0
	594	-0.670119	-0.516769	0.303492	0.0341046	-0.265067	0.925057	0.202496	1														0	1	0	0
	595	-0.717708	0.714632	1.18693	0.508962	2.42226	-0.986094	-0.900028	1														0	0	0	0
	605	-0.743717	0.842435	-1.96133	0.69202	-0.463386	0.388005	-0.883384	1														0	0	0	0
	606	1.46355	-0.772915	-0.121231	-0.295494	-0.784348	0.28692	0.71268	1														0	0	0	0
	611	-0.594671	0.622131	-0.064026	-0.15079	0.415521	-0.140506	-0.47725	1														0	0	0	0
	616	-0.781679	0.91617	0.38928	0.0341046	-0.00410951	-0.19746	-1.06406	1														0	1	1	1
	619	0.066852	-0.867922	-0.319473	1.18571	-0.443371	1.09621	0.312003	1														0	0	0	0
	621	-0.735369	0.266172	0.103993	-0.248563	-0.871919	-0.24098	0.146047	1														0	0	1	0
	631	-0.338102	0.751198	1.11717	-0.440752	0.415521	-0.986094	-0.578491	1														0	0	0	0
	633	0.439373	-0.186874	0.0701956	1.6809	0.0941537	1.29432	-0.666929	1														0	0	0	0
	634	-0.781679	0.871488	-2.17242	1.63551	-1.49527	1.20226	-1.57614	1														0	0	0	0
	638	-0.338102	1.22404	0.264173	0.109686	0.751723	0.0868457	-1.33743	1														0	0	0	0
	639	-0.486888	0.065162	-1.03134	-0.0346013	0.415521	-0.40572	0.0888677	1														0	0	0	0
	640	-0.781679	-0.345437	0.621565	-0.908072	0.415521	-0.412135	0.617046	1														0	0	0	1
	643	-0.781679	1.17014	0.241311	0.176816	0.415521	0.204178	-0.654579	1														0	0	0	0
	647	-0.45897	0.403612	0.322414	0.00618797	-0.207506	0.081581	-0.294	1														0	0	0	0
	648	-0.705285	0.101797	-2.05661	1.17879	-0.778164	0.676693	-0.390195	1														0	0	0	0
	650	-0.532498	0.155304	0.303814	0.324829	-0.264088	0.325615	-0.500363	1														0	1	1	1
	651	-0.50172	0.466305	-0.0657176	0.799574	0.630078	-0.079439	-1.18311	1														0	0	0	0
	656	-0.768897	1.56597	0.747345	-1.07363	1.08508	-0.719645	-0.551189	1														0	0	0	0
[truncated: 127 more rows]
